# Supplementary material for: Large-scale characterization of drug mechanism of action using proteome-wide thermal shift assays
Source: bioRxiv preprint, doi:10.1101/2024.01.26.577428, version 4 (2024-08-14)
Supplement: Figure 1 - source data 1 [file 577428_file06.xlsx]

## Sheet: Legend
This table contains PISA data for palbociclib-, ribociclib-, and abemaciclib-treated K562 cells using a full melting cuve or thermal window
Full curve - Full dataset
Unirpot Id
Gene Symbol
Description
Number of peptides	Number of quantified peptides
Veh_126_sn scaled	TMT SSN scaled to 100
Veh_127n_sn scaled	TMT SSN scaled to 100
Veh_127c_sn scaled	TMT SSN scaled to 100
Veh_128n_sn scaled	TMT SSN scaled to 100
Ribociclib_128c_sn scaled	TMT SSN scaled to 100
Ribocilcib_129n_sn scaled	TMT SSN scaled to 100
Ribociclib_129c_sn scaled	TMT SSN scaled to 100
Ribociclib_130n_sn scaled	TMT SSN scaled to 100
Abemaciclib_130c_sn scaled	TMT SSN scaled to 100
Abemaciclib_131_sn scaled	TMT SSN scaled to 100
Abemaciclib_131c_sn scaled	TMT SSN scaled to 100
Abemaciclib_132n_sn scaled	TMT SSN scaled to 100
Palbociclib_132c_sn scaled	TMT SSN scaled to 100
Palbociclib_133n_sn scaled	TMT SSN scaled to 100
Palbociclib_133c_sn scaled	TMT SSN scaled to 100
Palbociclib_134n_sn scaled	TMT SSN scaled to 100
Veh_mean	Average of 4 vehicle-treated samples
Veh_126_sn scaled	Fold change (compared to Veh_mean)
Veh_127n_sn scaled	Fold change (compared to Veh_mean)
Veh_127c_sn scaled	Fold change (compared to Veh_mean)
Veh_128n_sn scaled	Fold change (compared to Veh_mean)
Ribociclib_128c_sn scaled	Fold change (compared to Veh_mean)
Ribociclib_129n_sn scaled	Fold change (compared to Veh_mean)
Ribociclib_129c_sn scaled	Fold change (compared to Veh_mean)
Ribociclib_130n_sn scaled	Fold change (compared to Veh_mean)
Abemaciclib_130c_sn scaled	Fold change (compared to Veh_mean)
Abemaciclib_131_sn scaled	Fold change (compared to Veh_mean)
Abemaciclib_131c_sn scaled	Fold change (compared to Veh_mean)
Abemaciclib_132n_sn scaled	Fold change (compared to Veh_mean)
Palbociclib_132c_sn scaled	Fold change (compared to Veh_mean)
Palbociclib_133n_sn scaled	Fold change (compared to Veh_mean)
Palbociclib_133c_sn scaled	Fold change (compared to Veh_mean)
Palbociclib_134n_sn scaled	Fold change (compared to Veh_mean)
Veh_126_sn scaled	Fold change (compared to Veh_mean) - log2 transformed
Veh_127n_sn scaled	Fold change (compared to Veh_mean) - log2 transformed
Veh_127c_sn scaled	Fold change (compared to Veh_mean) - log2 transformed
Veh_128n_sn scaled	Fold change (compared to Veh_mean) - log2 transformed
Ribociclib_128c_sn scaled	Fold change (compared to Veh_mean) - log2 transformed
Ribociclib_129n_sn scaled	Fold change (compared to Veh_mean) - log2 transformed
Ribociclib_129c_sn scaled	Fold change (compared to Veh_mean) - log2 transformed
Ribociclib_130n_sn scaled	Fold change (compared to Veh_mean) - log2 transformed
Abemaciclib_130c_sn scaled	Fold change (compared to Veh_mean) - log2 transformed
Abemaciclib_131_sn scaled	Fold change (compared to Veh_mean) - log2 transformed
Abemaciclib_131c_sn scaled	Fold change (compared to Veh_mean) - log2 transformed
Abemaciclib_132n_sn scaled	Fold change (compared to Veh_mean) - log2 transformed
Palbociclib_132c_sn scaled	Fold change (compared to Veh_mean) - log2 transformed
Palbociclib_133n_sn scaled	Fold change (compared to Veh_mean) - log2 transformed
Palbociclib_133c_sn scaled	Fold change (compared to Veh_mean) - log2 transformed
Palbociclib_134n_sn scaled	Fold change (compared to Veh_mean) - log2 transformed
Full curve - pbFDR
Protein Id
Gene Symbol
Description
Number of peptides	Number of quantified peptides
Veh_126_sn scaled	TMT SSN Scaled to 100 - log2 transformed
Veh_127n_sn scaled	TMT SSN Scaled to 100 - log2 transformed
Veh_127c_sn scaled	TMT SSN Scaled to 100 - log2 transformed
Veh_128n_sn scaled	TMT SSN Scaled to 100 - log2 transformed
Ribociclib_128c_sn scaled	TMT SSN Scaled to 100 - log2 transformed
Ribocilcib_129n_sn scaled	TMT SSN Scaled to 100 - log2 transformed
Ribociclib_129c_sn scaled	TMT SSN Scaled to 100 - log2 transformed
Ribociclib_130n_sn scaled	TMT SSN Scaled to 100 - log2 transformed
Abemaciclib_130c_sn scaled	TMT SSN Scaled to 100 - log2 transformed
Abemaciclib_131_sn scaled	TMT SSN Scaled to 100 - log2 transformed
Abemaciclib_131c_sn scaled	TMT SSN Scaled to 100 - log2 transformed
Abemaciclib_132n_sn scaled	TMT SSN Scaled to 100 - log2 transformed
Palbociclib_132c_sn scaled	TMT SSN Scaled to 100 - log2 transformed
Palbociclib_133n_sn scaled	TMT SSN Scaled to 100 - log2 transformed
Palbociclib_133c_sn scaled	TMT SSN Scaled to 100 - log2 transformed
Palbociclib_134n_sn scaled	TMT SSN Scaled to 100 - log2 transformed
Significant	Palbociclib [yes (+) or no (-)]
-log10 p-value	Palbociclib (compared to Vehicle)
log2 difference	Palbociclib (compared to Vehicle)
Significant	Ribociclib [yes (+) or no (-)]
-log10 p-value	Ribociclib (compared to Vehicle)
log2 difference	Ribociclib (compared to Vehicle)
Significant	Abemaciclib [yes (+) or no (-)]
-log10 p-value	Abemaciclib (compared to Vehicle)
log2 difference	Abemaciclib (compared to Vehicle)
Thermal window - Full dataset
Unirpot Id
Gene Symbol
Description
Number of peptides	Number of quantified peptides
Veh_126_sn scaled	TMT SSN scaled to 100
Veh_127n_sn scaled	TMT SSN scaled to 100
Veh_127c_sn scaled	TMT SSN scaled to 100
Veh_128n_sn scaled	TMT SSN scaled to 100
Ribociclib_128c_sn scaled	TMT SSN scaled to 100
Ribocilcib_129n_sn scaled	TMT SSN scaled to 100
Ribociclib_129c_sn scaled	TMT SSN scaled to 100
Ribociclib_130n_sn scaled	TMT SSN scaled to 100
Abemaciclib_130c_sn scaled	TMT SSN scaled to 100
Abemaciclib_131_sn scaled	TMT SSN scaled to 100
Abemaciclib_131c_sn scaled	TMT SSN scaled to 100
Abemaciclib_132n_sn scaled	TMT SSN scaled to 100
Palbociclib_132c_sn scaled	TMT SSN scaled to 100
Palbociclib_133n_sn scaled	TMT SSN scaled to 100
Palbociclib_133c_sn scaled	TMT SSN scaled to 100
Palbociclib_134n_sn scaled	TMT SSN scaled to 100
Veh_mean	Average of 4 vehicle-treated samples
Veh_126_sn scaled	Fold change (compared to Veh_mean)
Veh_127n_sn scaled	Fold change (compared to Veh_mean)
Veh_127c_sn scaled	Fold change (compared to Veh_mean)
Veh_128n_sn scaled	Fold change (compared to Veh_mean)
Ribociclib_128c_sn scaled	Fold change (compared to Veh_mean)
Ribociclib_129n_sn scaled	Fold change (compared to Veh_mean)
Ribociclib_129c_sn scaled	Fold change (compared to Veh_mean)
Ribociclib_130n_sn scaled	Fold change (compared to Veh_mean)
Abemaciclib_130c_sn scaled	Fold change (compared to Veh_mean)
Abemaciclib_131_sn scaled	Fold change (compared to Veh_mean)
Abemaciclib_131c_sn scaled	Fold change (compared to Veh_mean)
Abemaciclib_132n_sn scaled	Fold change (compared to Veh_mean)
Palbociclib_132c_sn scaled	Fold change (compared to Veh_mean)
Palbociclib_133n_sn scaled	Fold change (compared to Veh_mean)
Palbociclib_133c_sn scaled	Fold change (compared to Veh_mean)
Palbociclib_134n_sn scaled	Fold change (compared to Veh_mean)
Veh_126_sn scaled	Fold change (compared to Veh_mean) - log2 transformed
Veh_127n_sn scaled	Fold change (compared to Veh_mean) - log2 transformed
Veh_127c_sn scaled	Fold change (compared to Veh_mean) - log2 transformed
Veh_128n_sn scaled	Fold change (compared to Veh_mean) - log2 transformed
Ribociclib_128c_sn scaled	Fold change (compared to Veh_mean) - log2 transformed
Ribociclib_129n_sn scaled	Fold change (compared to Veh_mean) - log2 transformed
Ribociclib_129c_sn scaled	Fold change (compared to Veh_mean) - log2 transformed
Ribociclib_130n_sn scaled	Fold change (compared to Veh_mean) - log2 transformed
Abemaciclib_130c_sn scaled	Fold change (compared to Veh_mean) - log2 transformed
Abemaciclib_131_sn scaled	Fold change (compared to Veh_mean) - log2 transformed
Abemaciclib_131c_sn scaled	Fold change (compared to Veh_mean) - log2 transformed
Abemaciclib_132n_sn scaled	Fold change (compared to Veh_mean) - log2 transformed
Palbociclib_132c_sn scaled	Fold change (compared to Veh_mean) - log2 transformed
Palbociclib_133n_sn scaled	Fold change (compared to Veh_mean) - log2 transformed
Palbociclib_133c_sn scaled	Fold change (compared to Veh_mean) - log2 transformed
Palbociclib_134n_sn scaled	Fold change (compared to Veh_mean) - log2 transformed
Thermal window - pbFDR
Protein Id
Gene Symbol
Description
Number of peptides	Number of quantified peptides
Veh_126_sn scaled	TMT SSN Scaled to 100 - log2 transformed
Veh_127n_sn scaled	TMT SSN Scaled to 100 - log2 transformed
Veh_127c_sn scaled	TMT SSN Scaled to 100 - log2 transformed
Veh_128n_sn scaled	TMT SSN Scaled to 100 - log2 transformed
Ribociclib_128c_sn scaled	TMT SSN Scaled to 100 - log2 transformed
Ribocilcib_129n_sn scaled	TMT SSN Scaled to 100 - log2 transformed
Ribociclib_129c_sn scaled	TMT SSN Scaled to 100 - log2 transformed
Ribociclib_130n_sn scaled	TMT SSN Scaled to 100 - log2 transformed
Abemaciclib_130c_sn scaled	TMT SSN Scaled to 100 - log2 transformed
Abemaciclib_131_sn scaled	TMT SSN Scaled to 100 - log2 transformed
Abemaciclib_131c_sn scaled	TMT SSN Scaled to 100 - log2 transformed
Abemaciclib_132n_sn scaled	TMT SSN Scaled to 100 - log2 transformed
Palbociclib_132c_sn scaled	TMT SSN Scaled to 100 - log2 transformed
Palbociclib_133n_sn scaled	TMT SSN Scaled to 100 - log2 transformed
Palbociclib_133c_sn scaled	TMT SSN Scaled to 100 - log2 transformed
Palbociclib_134n_sn scaled	TMT SSN Scaled to 100 - log2 transformed
Significant	Palbociclib [yes (+) or no (-)]
-log10 p-value	Palbociclib (compared to Vehicle)
log2 difference	Palbociclib (compared to Vehicle)
Significant	Ribociclib [yes (+) or no (-)]
-log10 p-value	Ribociclib (compared to Vehicle)
log2 difference	Ribociclib (compared to Vehicle)
Significant	Abemaciclib [yes (+) or no (-)]
-log10 p-value	Abemaciclib (compared to Vehicle)
log2 difference	Abemaciclib (compared to Vehicle)

## Sheet: Full curve - Full dataset
Protein Id	Gene Symbol	Description	Number of peptides	Veh_126_sn scaled	Veh_127n_sn scaled	Veh_127c_sn scaled	Veh_128n_sn scaled	Ribociclib_128c_sn scaled	Ribocilcib_129n_sn scaled	Ribociclib_129c_sn scaled	Ribociclib_130n_sn scaled	Abemaciclib_130c_sn scaled	Abemaciclib_131_sn scaled	Abemaciclib_131c_sn scaled	Abemaciclib_132n_sn scaled	Palbociclib_132c_sn scaled	Palbociclib_133n_sn scaled	Palbociclib_133c_sn scaled	Palbociclib_134n_sn scaled	Veh_mean	Veh_126_sn scaled	Veh_127n_sn scaled	Veh_127c_sn scaled	Veh_128n_sn scaled	Ribociclib_128c_sn scaled	Ribociclib_129n_sn scaled	Ribociclib_129c_sn scaled	Ribociclib_130n_sn scaled	Abemaciclib_130c_sn scaled	Abemaciclib_131_sn scaled	Abemaciclib_131c_sn scaled	Abemaciclib_132n_sn scaled	Palbociclib_132c_sn scaled	Palbociclib_133n_sn scaled	Palbociclib_133c_sn scaled	Palbociclib_134n_sn scaled	Veh_126_sn scaled	Veh_127n_sn scaled	Veh_127c_sn scaled	Veh_128n_sn scaled	Ribociclib_128c_sn scaled	Ribociclib_129n_sn scaled	Ribociclib_129c_sn scaled	Ribociclib_130n_sn scaled	Abemaciclib_130c_sn scaled	Abemaciclib_131_sn scaled	Abemaciclib_131c_sn scaled	Abemaciclib_132n_sn scaled	Palbociclib_132c_sn scaled
sp|P55011|S12A2_HUMAN	SLC12A2	S12A2_HUMAN Solute carrier family 12 member 2	42	6.5643	6.04683	6.033	6.20011	6.31439	6.56423	6.42497	6.39034	6.01498	6.20307	6.47815	6.41858	6.22173	5.95196	6.14515	6.02822	6.21106	1.05687	0.973558	0.971332	0.998237	1.01664	1.05686	1.03444	1.02886	0.968431	0.998714	1.043	1.03341	1.00172	0.958284	0.989388	0.970562	0.0798017	-0.0386605	-0.0419639	-0.00254569	0.0238039	0.0797863	0.0488502	0.0410532	-0.0462796	-0.0018571	0.0607424	0.0474147	0.00247628
sp|Q76L83|ASXL2_HUMAN	ASXL2	ASXL2_HUMAN Putative Polycomb group protein ASXL2	3	6.3425	5.96975	7.17933	7.76204	5.9111	5.67046	5.87218	6.11602	6.12662	6.14163	6.06329	6.81093	5.53355	6.94424	6.45064	5.10572	6.8134	0.930886	0.876177	1.05371	1.13923	0.867569	0.832251	0.861857	0.897645	0.899201	0.901404	0.889906	0.999637	0.812156	1.0192	0.946757	0.749364	-0.103324	-0.190705	0.0754732	0.18806	-0.204949	-0.26491	-0.21448	-0.155783	-0.153285	-0.149754	-0.168275	-0.000524161	-0.300171
sp|Q99453|PHX2B_HUMAN	PHOX2B	PHX2B_HUMAN Paired mesoderm homeobox protein 2B	1	7.00858	5.12423	6.58748	4.50415	6.90731	6.60126	5.71934	9.81319	6.84628	5.49696	5.15961	5.66101	5.97957	6.75407	5.75982	6.07715	5.80611	1.2071	0.882558	1.13458	0.77576	1.18966	1.13695	0.985055	1.69015	1.17915	0.946754	0.888652	0.975009	1.02988	1.16327	0.992027	1.04668	0.27155	-0.180237	0.182155	-0.366317	0.250552	0.18517	-0.0217232	0.75715	0.237748	-0.0789379	-0.17031	-0.0365124	0.0424698
sp|Q9NYV4|CDK12_HUMAN	CDK12	CDK12_HUMAN Cyclin-dependent kinase 12	20	7.03574	6.52939	7.03258	6.35517	6.95241	6.51775	5.78539	7.63802	5.7495	5.35575	4.7543	4.84063	5.52839	8.25119	5.90184	5.77194	6.73822	1.04415	0.969008	1.04369	0.943153	1.03179	0.967281	0.858593	1.13354	0.853267	0.794832	0.705572	0.718384	0.820453	1.22454	0.875875	0.856597	0.0623346	-0.0454193	0.0616865	-0.0844368	0.0451456	-0.0479935	-0.219953	0.180831	-0.228931	-0.331279	-0.503135	-0.477173	-0.285508
sp|P24941|CDK2_HUMAN	CDK2	CDK2_HUMAN Cyclin-dependent kinase 2	36	6.48588	6.01521	6.04875	6.47745	6.25955	6.41938	6.45511	5.81186	6.02634	6.33126	6.54554	6.44562	6.31994	6.22913	6.06691	6.06206	6.25682	1.03661	0.961384	0.966745	1.03526	1.00044	1.02598	1.03169	0.928884	0.963163	1.0119	1.04614	1.03017	1.01009	0.995574	0.969647	0.968872	0.0518722	-0.0568151	-0.0487931	0.0499958	0.000628769	0.0370038	0.0450115	-0.10643	-0.0541481	0.0170625	0.065082	0.042889	0.0144807
sp|Q14004|CDK13_HUMAN	CDK13	CDK13_HUMAN Cyclin-dependent kinase 13	15	6.53714	6.71839	7.23726	6.86643	6.75228	6.44601	6.02177	6.28957	5.88568	5.81332	5.26744	5.77459	5.71721	6.32277	6.23052	6.11961	6.83981	0.955749	0.982249	1.05811	1.00389	0.987204	0.942426	0.880401	0.919554	0.860504	0.849925	0.770116	0.844262	0.835873	0.924408	0.910921	0.894705	-0.0652956	-0.0258396	0.0814884	0.00560501	-0.0185805	-0.0855488	-0.183768	-0.120994	-0.216746	-0.234593	-0.376853	-0.244237	-0.258644
sp|P07947|YES_HUMAN	YES1	YES_HUMAN Tyrosine-protein kinase Yes	12	5.52288	7.15367	7.61574	5.11002	6.25788	6.13475	5.04196	5.59756	7.45485	5.61644	5.56067	5.91485	6.9925	6.42761	7.13748	6.46115	6.35058	0.869666	1.12646	1.19922	0.804654	0.985403	0.966015	0.793937	0.881425	1.17389	0.884398	0.875616	0.931388	1.10108	1.01213	1.12391	1.01741	-0.201467	0.171796	0.262096	-0.313559	-0.0212138	-0.0498832	-0.332903	-0.18209	0.231292	-0.177232	-0.191629	-0.102546	0.138921
sp|P12931-2|SRC_HUMAN	SRC	SRC_HUMAN Isoform 2 of Proto-oncogene tyrosine-protein kinase Src	6	6.48622	6.21979	5.96895	6.60661	6.24583	5.79112	6.07427	7.75699	5.89337	6.79943	6.55336	6.54933	5.86979	5.58487	5.76132	5.83876	6.32039	1.02624	0.984083	0.944395	1.04528	0.988203	0.91626	0.961059	1.2273	0.932437	1.07579	1.03686	1.03622	0.928707	0.883627	0.911545	0.923797	0.0373638	-0.0231483	-0.082537	0.063896	-0.0171209	-0.126172	-0.0573031	0.295483	-0.100921	0.1054	0.0522206	0.0513332	-0.106705
sp|P50750-2|CDK9_HUMAN	CDK9	CDK9_HUMAN Isoform 2 of Cyclin-dependent kinase 9	15	6.51642	6.44104	6.73545	6.28641	6.36408	6.00686	5.64731	6.21935	6.21262	6.06103	6.01897	6.09912	5.96619	6.83188	6.30823	6.28503	6.49483	1.00332	0.991718	1.03705	0.96791	0.979869	0.924868	0.869509	0.957585	0.956549	0.933208	0.926732	0.939073	0.918606	1.0519	0.971269	0.967697	0.00478783	-0.0119981	0.0524826	-0.0470554	-0.0293398	-0.112681	-0.201728	-0.062528	-0.06409	-0.0997288	-0.109775	-0.0906907	-0.122482
sp|Q00534|CDK6_HUMAN	CDK6	CDK6_HUMAN Cyclin-dependent kinase 6	25	5.55444	5.5655	5.62974	5.65089	6.49386	5.96584	6.55401	5.44711	5.99374	6.27252	6.22385	6.34636	7.11745	7.09664	6.93764	7.15041	5.60014	0.991839	0.993814	1.00529	1.00906	1.15959	1.0653	1.17033	0.972673	1.07028	1.12006	1.11137	1.13325	1.27094	1.26722	1.23883	1.27683	-0.0118221	-0.00895223	0.00760476	0.0130146	0.213613	0.0912617	0.226914	-0.0399725	0.097993	0.163582	0.152344	0.180466	0.345897
sp|Q00536-2|CDK16_HUMAN	CDK16	CDK16_HUMAN Isoform 2 of Cyclin-dependent kinase 16	6	5.90013	5.39043	6.04726	5.70569	6.54681	6.28679	6.42536	6.62173	5.78012	6.66435	6.88727	6.58421	6.06884	6.4934	6.36885	6.22877	5.76088	1.02417	0.935696	1.04971	0.99042	1.13643	1.09129	1.11534	1.14943	1.00334	1.15683	1.19552	1.14292	1.05346	1.12715	1.10553	1.08122	0.0344582	-0.0958882	0.069993	-0.0138872	0.184504	0.126035	0.157489	0.20092	0.00481086	0.210176	0.257644	0.192722	0.0751322
sp|P06493|CDK1_HUMAN	CDK1	CDK1_HUMAN Cyclin-dependent kinase 1	53	6.33917	6.1471	5.90087	6.05457	6.27096	6.03372	6.25455	6.50407	6.56233	6.5606	6.32706	6.1837	6.46071	6.22939	6.2012	5.97	6.11043	1.03743	1.006	0.965705	0.990859	1.02627	0.987446	1.02359	1.06442	1.07396	1.07367	1.03545	1.01199	1.05733	1.01947	1.01486	0.977018	0.0530206	0.00863264	-0.0503456	-0.0132488	0.037413	-0.0182256	0.0336328	0.0900695	0.102935	0.102554	0.050262	0.017197	0.0804194
sp|Q13188|STK3_HUMAN	STK3	STK3_HUMAN Serine/threonine-protein kinase 3	24	6.54636	6.13283	6.31552	6.22811	6.27547	6.55815	6.44539	6.11389	5.97271	6.38544	6.39274	6.41864	6.12345	6.09143	5.99017	6.0097	6.30571	1.03816	0.972584	1.00156	0.987694	0.995205	1.04003	1.02215	0.969581	0.947191	1.01264	1.0138	1.01791	0.971097	0.966019	0.94996	0.953058	0.0540353	-0.0401047	0.00224385	-0.0178633	-0.00693416	0.0566312	0.03161	-0.0445671	-0.078272	0.0181284	0.0197767	0.02561	-0.042313
sp|Q13043|STK4_HUMAN	STK4	STK4_HUMAN Serine/threonine-protein kinase 4	24	6.60371	5.90774	6.29788	6.33787	6.34176	6.2101	6.44813	6.5361	6.06135	6.20473	6.55287	6.46114	5.89452	6.04475	6.09328	6.00404	6.2868	1.05041	0.939705	1.00176	1.00812	1.00874	0.9878	1.02566	1.03965	0.964139	0.986946	1.04232	1.02773	0.937603	0.961499	0.969218	0.955023	0.0709509	-0.0897195	0.0025404	0.0116722	0.0125574	-0.0177094	0.036555	0.0561042	-0.0526867	-0.0189574	0.059801	0.0394629	-0.0929515
sp|P11802|CDK4_HUMAN	CDK4	CDK4_HUMAN Cyclin-dependent kinase 4	12	4.81039	5.18608	5.79555	5.48347	6.99822	6.07514	6.9217	5.71298	6.11643	6.34797	6.36756	6.32796	7.44944	6.11384	6.96753	7.32575	5.31887	0.9044	0.975034	1.08962	1.03095	1.31573	1.14219	1.30135	1.0741	1.14995	1.19348	1.19716	1.18972	1.40057	1.14946	1.30996	1.37731	-0.144967	-0.036476	0.123825	0.0439687	0.395868	0.191797	0.380006	0.103123	0.201569	0.255175	0.25962	0.25062	0.486012
sp|P07948|LYN_HUMAN	LYN	LYN_HUMAN Tyrosine-protein kinase Lyn	12	5.36652	6.32808	7.2911	5.69109	5.33663	5.4375	5.54259	5.7042	7.98985	6.16176	5.66247	6.07872	6.74586	6.66124	6.79811	7.20429	6.1692	0.869889	1.02575	1.18186	0.922501	0.865044	0.881395	0.89843	0.924626	1.29512	0.998794	0.917862	0.985334	1.09347	1.07976	1.10194	1.16778	-0.201096	0.036685	0.241054	-0.116378	-0.209154	-0.182139	-0.154523	-0.113058	0.373086	-0.00174034	-0.123651	-0.0213153	0.12892
sp|P07948-2|LYN_HUMAN	LYN	LYN_HUMAN Isoform 2 of Tyrosine-protein kinase Lyn	1	5.08436	6.22347	6.32086	6.00663	5.17333	6.82816	5.75198	5.23685	8.15707	7.27887	5.88975	5.53737	5.74275	7.45812	5.63628	7.67415	5.90883	0.860468	1.05325	1.06973	1.01655	0.875525	1.15559	0.973455	0.886275	1.38049	1.23186	0.996771	0.937135	0.971893	1.2622	0.953874	1.29876	-0.216806	0.0748467	0.0972484	0.0236833	-0.191779	0.208624	-0.0388138	-0.174173	0.465179	0.300842	-0.00466609	-0.0936716	-0.0411307
sp|Q00535|CDK5_HUMAN	CDK5	CDK5_HUMAN Cyclin-dependent kinase 5	16	6.32878	6.21836	6.12137	6.04387	6.39806	5.98899	6.4246	6.36076	6.41043	6.54995	6.51806	6.27134	6.37557	5.97881	5.92197	6.0891	6.17809	1.02439	1.00652	0.990818	0.978274	1.0356	0.969391	1.0399	1.02957	1.03761	1.06019	1.05503	1.01509	1.03196	0.967743	0.958543	0.985595	0.0347654	0.00937209	-0.0133075	-0.0316894	0.0504725	-0.0448493	0.0564446	0.0420371	0.0532591	0.0843218	0.0772806	0.0216117	0.0453923
sp|P22607-2|FGFR3_HUMAN	FGFR3	FGFR3_HUMAN Isoform 2 of Fibroblast growth factor receptor 3	3	5.82536	5.74081	5.69769	6.29852	6.3088	6.37355	6.60327	6.6891	6.61725	6.07249	6.58986	6.67935	6.04383	6.76259	5.84117	5.85636	5.8906	0.988926	0.974572	0.967252	1.06925	1.071	1.08199	1.12099	1.13556	1.12336	1.03088	1.11871	1.1339	1.02601	1.14803	0.99161	0.994188	-0.0160662	-0.0371591	-0.0480362	0.0965995	0.0989522	0.113684	0.164767	0.183399	0.167818	0.0438748	0.161834	0.181294	0.0370497
sp|Q00537|CDK17_HUMAN	CDK17	CDK17_HUMAN Cyclin-dependent kinase 17	8	6.08233	6.39929	6.64112	7.04049	6.08505	5.92592	5.5282	5.71317	6.81531	6.29215	6.4621	6.69763	6.18725	6.16629	6.17148	5.79222	6.54081	0.929905	0.978364	1.01534	1.07639	0.930321	0.905992	0.845186	0.873466	1.04197	0.961984	0.987967	1.02398	0.945946	0.942741	0.943535	0.885551	-0.104845	-0.0315569	0.0219578	0.106207	-0.1042	-0.14243	-0.242659	-0.195177	0.0593105	-0.0559157	-0.0174657	0.0341819	-0.0801704
sp|P41240|CSK_HUMAN	CSK	CSK_HUMAN Tyrosine-protein kinase CSK	30	6.46985	6.2436	6.14861	6.14101	6.52482	5.87938	6.3824	5.81838	6.34756	6.50634	6.37915	6.294	6.38289	6.25229	6.13082	6.0989	6.25077	1.03505	0.998853	0.983657	0.982441	1.04384	0.940585	1.02106	0.930826	1.01548	1.04089	1.02054	1.00692	1.02114	1.00024	0.980811	0.975704	0.0496989	-0.00165523	-0.023773	-0.0255574	0.0619048	-0.0883693	0.0300657	-0.103416	0.0221688	0.0578129	0.0293309	0.00994384	0.0301764
sp|P42679-2|MATK_HUMAN	MATK	MATK_HUMAN Isoform 2 of Megakaryocyte-associated tyrosine-protein kinase	2	6.03877	6.80594	7.1222	6.56115	6.87221	5.49692	6.73945	6.60211	5.85565	6.13501	6.16162	5.38346	6.48724	6.33207	5.58496	5.82122	6.63201	0.910548	1.02623	1.07391	0.989315	1.03622	0.828846	1.0162	0.995491	0.882937	0.92506	0.929072	0.811738	0.97817	0.954773	0.842121	0.877745	-0.135193	0.0373472	0.102876	-0.0154986	0.0513269	-0.270824	0.0231836	-0.00652009	-0.179618	-0.112382	-0.106138	-0.300914	-0.0318425
sp|P36578|RL4_HUMAN	RPL4	RL4_HUMAN 60S ribosomal protein L4	102	5.88387	6.3294	7.24899	5.96988	6.95758	7.43917	5.09852	6.71062	6.49787	5.95676	4.81557	5.40574	6.02847	7.00321	6.44882	6.20552	6.35804	0.925423	0.995496	1.14013	0.93895	1.0943	1.17004	0.801902	1.05546	1.02199	0.936887	0.757399	0.850222	0.948166	1.10147	1.01428	0.976012	-0.111816	-0.00651221	0.189199	-0.090879	0.130005	0.226561	-0.318502	0.0778651	0.0313859	-0.0940531	-0.400874	-0.234089	-0.0767891
sp|Q6SPF0|SAMD1_HUMAN	SAMD1	SAMD1_HUMAN Atherin	6	6.18571	6.66502	7.4568	6.78647	6.39729	5.58121	6.16857	4.81183	7.1993	5.88683	5.98184	5.92855	6.83235	6.43664	5.98325	5.69835	6.7735	0.913222	0.983985	1.10088	1.00191	0.944459	0.823977	0.910692	0.71039	1.06286	0.869097	0.883124	0.875257	1.00869	0.950268	0.883332	0.841271	-0.130962	-0.0232923	0.138655	0.00275985	-0.0824406	-0.279324	-0.134965	-0.493316	0.0879551	-0.202411	-0.179312	-0.192222	0.0124804
sp|O76031|CLPX_HUMAN	CLPX	CLPX_HUMAN ATP-dependent Clp protease ATP-binding subunit clpX-like, mitochondrial	40	6.19812	6.38428	6.55439	6.21148	5.97599	6.0643	6.32618	6.02346	6.59742	6.29072	6.16464	6.24623	6.60658	5.92558	6.25917	6.17145	6.33707	0.978074	1.00745	1.03429	0.980182	0.943021	0.956957	0.998282	0.950512	1.04108	0.992686	0.972791	0.985666	1.04253	0.935067	0.987708	0.973865	-0.0319847	0.0107085	0.0486461	-0.0288783	-0.0846376	-0.0634743	-0.00248078	-0.0732229	0.0580866	-0.0105902	-0.0397987	-0.0208297	0.0600882
sp|Q8WUQ7-2|CATIN_HUMAN	CACTIN	CATIN_HUMAN Isoform 2 of Cactin	11	5.94517	6.23068	6.4149	5.98386	6.65522	6.38397	6.25432	6.68663	6.56339	6.09429	5.94071	6.26865	6.04947	6.21019	6.16259	6.15595	6.14365	0.967693	1.01417	1.04415	0.973991	1.08327	1.03912	1.01801	1.08838	1.06832	0.991965	0.966967	1.02035	0.98467	1.01083	1.00308	1.002	-0.0473786	0.020293	0.0623302	-0.0380202	0.11539	0.0553573	0.0257564	0.122183	0.0953445	-0.0116385	-0.0484613	0.0290582	-0.0222879
sp|P82914|RT15_HUMAN	MRPS15	RT15_HUMAN 28S ribosomal protein S15, mitochondrial	17	5.99834	6.78744	6.81299	5.80524	5.96763	5.43198	5.7167	5.79491	7.5638	6.28023	5.82279	5.93046	6.70824	6.17735	6.71327	6.48864	6.351	0.944471	1.06872	1.07274	0.914067	0.939636	0.855295	0.900126	0.91244	1.19096	0.988856	0.91683	0.933783	1.05625	0.972657	1.05704	1.02167	-0.082421	0.0958832	0.101304	-0.129629	-0.0898262	-0.225506	-0.151802	-0.132198	0.252127	-0.0161669	-0.125274	-0.0988403	0.07895
sp|Q9BTD8|RBM42_HUMAN	RBM42	RBM42_HUMAN RNA-binding protein 42	10	6.17763	6.03923	6.58998	6.48565	6.55879	6.59272	6.04701	6.53379	6.40977	6.06479	5.64665	5.90048	5.94441	6.40954	6.2563	6.34327	6.32312	0.97699	0.955102	1.0422	1.0257	1.03727	1.04264	0.956333	1.03332	1.0137	0.959145	0.893016	0.933159	0.940107	1.01367	0.989432	1.00319	-0.0335837	-0.0662726	0.0596369	0.036614	0.0527925	0.0602366	-0.0644152	0.0472829	0.0196354	-0.0601795	-0.163242	-0.0998048	-0.0891035
sp|Q9P258|RCC2_HUMAN	RCC2	RCC2_HUMAN Protein RCC2	85	6.55905	6.19562	6.12336	6.34562	6.54625	6.07968	6.49996	6.11351	5.97407	6.239	6.44163	6.28154	6.17896	6.16397	6.12853	6.12925	6.30591	1.04014	0.98251	0.971051	1.0063	1.03811	0.964124	1.03077	0.969489	0.947376	0.989389	1.02152	0.996135	0.979868	0.977491	0.97187	0.971985	0.0567817	-0.0254565	-0.0423816	0.00905598	0.0539635	-0.0527098	0.0437257	-0.0447042	-0.077991	-0.0153903	0.0307206	-0.00558685	-0.0293411
sp|Q9H3U1|UN45A_HUMAN	UNC45A	UN45A_HUMAN Protein unc-45 homolog A	65	6.09455	6.33543	6.82026	6.31755	6.28119	5.45094	6.18748	5.68957	6.52737	6.23444	6.25108	6.15338	6.52296	6.27403	6.50577	6.35401	6.39195	0.953473	0.991158	1.06701	0.988361	0.982672	0.852782	0.968012	0.890115	1.02119	0.975358	0.977962	0.962677	1.0205	0.981552	1.01781	0.994065	-0.0687359	-0.012813	0.0935712	-0.0168904	-0.0252176	-0.229751	-0.0469036	-0.167936	0.0302463	-0.0359956	-0.0321501	-0.0548765	0.0292712
sp|P17542|TAL1_HUMAN	TAL1	TAL1_HUMAN T-cell acute lymphocytic leukemia protein 1	11	6.13543	5.98978	6.36334	6.42033	6.40124	6.06553	6.63623	5.66715	6.14589	6.4555	6.60192	6.45859	6.45506	5.92218	6.23109	6.05074	6.22722	0.98526	0.961871	1.02186	1.03101	1.02795	0.974035	1.06568	0.910061	0.98694	1.03666	1.06017	1.03715	1.03659	0.951015	1.00062	0.97166	-0.0214238	-0.0560852	0.031196	0.0440592	0.0397632	-0.0379545	0.0917756	-0.135965	-0.0189663	0.0519406	0.0842974	0.052631	0.0518423
sp|P12980|LYL1_HUMAN	LYL1	LYL1_HUMAN Protein lyl-1	3	5.94591	4.25131	4.13026	7.59185	5.37063	6.1443	7.4594	6.38423	4.85875	5.43752	4.57561	4.57345	4.79559	19.0864	4.83984	4.55498	5.47983	1.08505	0.77581	0.75372	1.38542	0.980072	1.12126	1.36125	1.16504	0.88666	0.992279	0.834991	0.834597	0.875134	3.48303	0.883209	0.831226	0.117766	-0.366224	-0.407899	0.47032	-0.0290405	0.165117	0.444928	0.220381	-0.173547	-0.011183	-0.260168	-0.260849	-0.192423
sp|Q99856|ARI3A_HUMAN	ARID3A	ARI3A_HUMAN AT-rich interactive domain-containing protein 3A	21	6.42372	6.15185	6.07261	6.85058	6.12772	5.02535	6.59	6.20594	6.21012	6.61226	6.43296	6.20124	6.54674	6.40272	6.26296	5.88323	6.37469	1.00769	0.965043	0.952613	1.07465	0.961258	0.788329	1.03378	0.973528	0.974184	1.03727	1.00914	0.972791	1.02699	1.0044	0.982473	0.922904	0.0110538	-0.0513349	-0.0700385	0.103871	-0.0570048	-0.343131	0.0479233	-0.0387054	-0.037734	0.0527883	0.0131275	-0.0397985	0.0384215
sp|Q8IVW6|ARI3B_HUMAN	ARID3B	ARI3B_HUMAN AT-rich interactive domain-containing protein 3B	11	6.08979	5.93839	6.15418	6.20412	5.83926	5.747	6.3928	6.5025	6.36579	6.61714	6.80924	6.88513	6.04633	6.37244	5.84626	6.18964	6.09662	0.99888	0.974046	1.00944	1.01763	0.957786	0.942653	1.04858	1.06657	1.04415	1.08538	1.11689	1.12934	0.991751	1.04524	0.958935	1.01526	-0.00161715	-0.0379378	0.013557	0.025217	-0.0622241	-0.0852006	0.0684383	0.0929849	0.0623299	0.118198	0.159484	0.175474	-0.0119499
sp|Q8NFZ5|TNIP2_HUMAN	TNIP2	TNIP2_HUMAN TNFAIP3-interacting protein 2	3	5.69087	6.32129	6.4124	6.3799	6.92474	5.83478	6.80544	5.83368	6.84311	6.23808	6.38394	5.84161	6.0405	5.86761	6.22135	6.36068	6.20111	0.917717	1.01938	1.03407	1.02883	1.11669	0.940924	1.09745	0.940747	1.10353	1.00596	1.02948	0.942026	0.974099	0.946219	1.00326	1.02573	-0.123878	0.0276914	0.0483368	0.0410062	0.159232	-0.0878494	0.134161	-0.0881214	0.142124	0.00857441	0.0419194	-0.0861616	-0.0378597
sp|Q9UPT8|ZC3H4_HUMAN	ZC3H4	ZC3H4_HUMAN Zinc finger CCCH domain-containing protein 4	32	6.19619	6.17656	6.88527	5.98216	6.36266	7.11955	6.02676	6.08142	5.97929	6.1169	6.13857	6.28767	5.96288	5.93409	6.25344	6.49658	6.31005	0.981957	0.978846	1.09116	0.948038	1.00834	1.12829	0.955106	0.963768	0.947583	0.969391	0.972825	0.996454	0.944982	0.94042	0.991029	1.02956	-0.0262689	-0.0308467	0.125863	-0.0769838	0.0119797	0.174136	-0.0662677	-0.0532421	-0.0776761	-0.0448496	-0.0397477	-0.00512479	-0.081641
sp|Q96L91|EP400_HUMAN	EP400	EP400_HUMAN E1A-binding protein p400	17	5.84383	6.54353	7.36153	6.20143	6.26866	5.5599	5.67259	6.71493	6.87479	5.68502	5.20339	5.34744	6.34099	7.50868	6.35561	6.51768	6.48758	0.900772	1.00862	1.13471	0.955893	0.966256	0.857007	0.874377	1.03504	1.05968	0.876293	0.802054	0.824258	0.977405	1.15739	0.979658	1.00464	-0.150766	0.0123887	0.182325	-0.0650795	-0.0495233	-0.222621	-0.193673	0.0496919	0.0836352	-0.190515	-0.318229	-0.278832	-0.0329723
sp|Q6ZTU2-6|E400N_HUMAN	EP400NL	E400N_HUMAN Isoform 5 of EP400 N-terminal-like protein	5	4.36878	6.37106	6.5197	7.01213	2.70089	6.27242	7.01554	7.09197	6.44501	6.70217	6.68507	6.90157	6.13296	6.75481	6.63497	6.39094	6.06792	0.71998	1.04996	1.07445	1.15561	0.44511	1.0337	1.15617	1.16877	1.06215	1.10453	1.10171	1.13739	1.01072	1.1132	1.09345	1.05323	-0.473971	0.070332	0.103604	0.208651	-1.16777	0.0478207	0.209353	0.224985	0.0869811	0.143427	0.139741	0.185723	0.0153821
sp|P52701|MSH6_HUMAN	MSH6	MSH6_HUMAN DNA mismatch repair protein Msh6	84	6.27292	6.38969	6.10269	6.2802	6.37227	5.44527	6.47183	5.97654	6.47515	6.61845	6.50607	6.19525	6.38668	6.16808	6.24598	6.09291	6.26138	1.00184	1.02049	0.974657	1.00301	1.01771	0.86966	1.03361	0.954509	1.03414	1.05703	1.03908	0.989439	1.02001	0.9851	0.997541	0.973095	0.00265766	0.0292664	-0.0370342	0.004331	0.0253279	-0.201476	0.0476942	-0.067169	0.0484341	0.0800139	0.0553068	-0.015317	0.0285867
sp|P20585|MSH3_HUMAN	MSH3	MSH3_HUMAN DNA mismatch repair protein Msh3	40	5.8993	6.08859	6.22849	6.27944	6.28435	5.81383	5.94903	6.23783	6.53316	6.6668	6.30043	6.63891	6.03094	6.4131	6.25464	6.38116	6.12396	0.963315	0.994225	1.01707	1.02539	1.02619	0.949359	0.971436	1.0186	1.06682	1.08864	1.02882	1.08409	0.984811	1.04722	1.02134	1.042	-0.0539199	-0.00835552	0.0244188	0.0361722	0.0372999	-0.0749748	-0.0418092	0.0265806	0.0933173	0.122531	0.0409866	0.116483	-0.0220808
sp|P55036|PSMD4_HUMAN	PSMD4	PSMD4_HUMAN 26S proteasome non-ATPase regulatory subunit 4	37	6.77949	6.20424	6.09934	6.24113	6.31746	6.59226	6.20799	6.25649	5.97388	6.28005	6.3469	6.25542	6.07541	6.10348	6.19594	6.07051	6.33105	1.07083	0.97997	0.963401	0.985797	0.997853	1.04126	0.980562	0.988223	0.943584	0.991944	1.0025	0.988054	0.959621	0.964055	0.978659	0.958847	0.098732	-0.0291903	-0.0537917	-0.0206375	-0.00310016	0.0583284	-0.0283186	-0.0170913	-0.0837765	-0.0116687	0.00360732	-0.017338	-0.059463
tr|Q5VWC4|Q5VWC4_HUMAN	PSMD4	Q5VWC4_HUMAN 26S proteasome non-ATPase regulatory subunit 4	2	6.15779	5.83915	6.5539	6.13574	5.44228	6.73082	5.70417	6.13152	6.68294	6.55185	6.9548	6.82715	5.48477	6.56347	5.97828	6.26136	6.17164	0.997755	0.946125	1.06194	0.994182	0.88182	1.0906	0.924254	0.993498	1.08285	1.06161	1.1269	1.10621	0.888705	1.06349	0.968669	1.01454	-0.00324241	-0.0798967	0.0866986	-0.00841773	-0.181444	0.125127	-0.113638	-0.00941032	0.114828	0.0862472	0.172354	0.145628	-0.170224
sp|Q99755|PI51A_HUMAN	PIP5K1A	PI51A_HUMAN Phosphatidylinositol 4-phosphate 5-kinase type-1 alpha	11	6.04467	6.3178	6.86046	5.93977	6.74059	6.64621	5.68604	5.08066	6.47747	6.23215	6.17726	6.0328	6.13865	6.63846	6.64284	6.34418	6.29067	0.960894	1.00431	1.09058	0.944218	1.07152	1.05652	0.903884	0.807649	1.02969	0.990697	0.981971	0.959007	0.975833	1.05529	1.05598	1.00851	-0.0575512	0.00620744	0.12509	-0.0828078	0.09966	0.079317	-0.145791	-0.308199	0.0422156	-0.0134849	-0.0262478	-0.0603871	-0.0352934
sp|Q9BQE4|SELS_HUMAN	VIMP	SELS_HUMAN Selenoprotein S	6	6.30446	5.92914	5.78253	6.55433	5.897	6.8512	6.64966	6.2662	5.84868	6.52315	6.63895	6.53824	6.09956	6.25968	5.89665	5.96056	6.14262	1.02635	0.965247	0.941379	1.06703	0.960015	1.11536	1.08255	1.02012	0.952148	1.06195	1.0808	1.06441	0.992991	1.01906	0.959958	0.970362	0.0375198	-0.0510301	-0.0871521	0.0935953	-0.0588718	0.157504	0.114428	0.0287379	-0.0707419	0.0867158	0.112102	0.0900494	-0.0101478
sp|O60518|RNBP6_HUMAN	RANBP6	RNBP6_HUMAN Ran-binding protein 6	11	6.07902	6.10656	6.42584	6.74846	6.17099	5.5907	6.19493	5.74405	6.79818	6.40851	6.87445	5.98741	6.18393	6.13602	6.24435	6.3066	6.33997	0.95884	0.963184	1.01354	1.06443	0.973347	0.881818	0.977123	0.906006	1.07227	1.01081	1.0843	0.944391	0.975388	0.967831	0.984918	0.994737	-0.0606372	-0.0541161	0.019409	0.0900823	-0.0389741	-0.181447	-0.033388	-0.142408	0.100673	0.015513	0.116768	-0.0825439	-0.035952
sp|O00410-3|IPO5_HUMAN	IPO5	IPO5_HUMAN Isoform 3 of Importin-5	90	6.56763	6.14697	6.28278	6.26476	6.49779	6.06173	6.44398	5.80496	5.95782	6.11261	6.4619	6.5283	6.29024	6.13706	6.2718	6.16966	6.31553	1.03992	0.973309	0.994814	0.99196	1.02886	0.959813	1.02034	0.919156	0.94336	0.967869	1.02318	1.03369	0.995995	0.97174	0.993075	0.976902	0.0564679	-0.0390295	-0.00750189	-0.0116457	0.0410442	-0.0591754	0.0290471	-0.121619	-0.0841204	-0.0471164	0.0330535	0.0478024	-0.00578989
sp|Q8N8D1|PDCD7_HUMAN	PDCD7	PDCD7_HUMAN Programmed cell death protein 7	3	5.71138	6.57828	6.69303	5.59292	6.27246	6.00162	5.8929	6.92384	6.97852	6.58653	4.96423	6.24994	6.31447	6.21551	6.26488	6.7595	6.1439	0.929601	1.0707	1.08938	0.91032	1.02092	0.976842	0.959146	1.12694	1.13584	1.07204	0.807993	1.01726	1.02776	1.01166	1.01969	1.1002	-0.105316	0.0985551	0.123504	-0.135554	0.029876	-0.0338033	-0.0601775	0.172417	0.183766	0.100363	-0.307585	0.024687	0.0395063
sp|O95159|ZFPL1_HUMAN	ZFPL1	ZFPL1_HUMAN Zinc finger protein-like 1	7	6.74046	6.37582	6.25918	6.4522	6.27095	6.01967	6.72542	5.88068	5.88353	5.96189	6.44641	6.49622	6.04456	5.98857	6.29271	6.16172	6.45692	1.04391	0.987441	0.969376	0.99927	0.971199	0.932283	1.04158	0.910757	0.911198	0.923334	0.998373	1.00609	0.936137	0.927466	0.974569	0.954282	0.062002	-0.0182341	-0.0448714	-0.00105388	-0.042161	-0.101161	0.0587793	-0.134862	-0.134163	-0.115075	-0.00234909	0.00875546	-0.0952077
sp|Q6P2E9|EDC4_HUMAN	EDC4	EDC4_HUMAN Enhancer of mRNA-decapping protein 4	71	5.93411	7.01832	7.21949	5.98301	6.49745	5.82284	5.83492	6.34071	7.44535	5.66125	5.28246	4.79143	6.35287	6.93139	6.63415	6.25025	6.53873	0.907532	1.07335	1.10411	0.915011	0.993686	0.890515	0.892363	0.969715	1.13865	0.865802	0.807872	0.732777	0.971575	1.06005	1.01459	0.955881	-0.139979	0.102115	0.142886	-0.12814	-0.00913738	-0.167288	-0.164298	-0.0443666	0.187329	-0.20789	-0.307801	-0.448555	-0.0416025
sp|Q9UNF1|MAGD2_HUMAN	MAGED2	MAGD2_HUMAN Melanoma-associated antigen D2	24	6.12546	6.20012	6.55357	6.30783	6.42684	5.29296	6.17424	6.15712	6.69321	6.3455	6.12724	6.02143	6.43499	6.44885	6.50858	6.18208	6.29674	0.972798	0.984655	1.04079	1.00176	1.02066	0.840587	0.980545	0.977826	1.06296	1.00774	0.973081	0.956277	1.02195	1.02416	1.03364	0.98179	-0.0397881	-0.0223101	0.0576748	0.00253754	0.0295033	-0.250531	-0.0283447	-0.0323506	0.088092	0.0111276	-0.0393689	-0.0645001	0.0313317
sp|Q9NQP4|PFD4_HUMAN	PFDN4	PFD4_HUMAN Prefoldin subunit 4	16	5.76311	5.1938	5.7251	7.36721	5.86506	6.61111	6.62505	7.0227	5.49041	6.22178	6.68155	6.97241	6.04999	6.3326	6.14226	5.93586	6.01231	0.958553	0.863862	0.95223	1.22536	0.975509	1.0996	1.10192	1.16805	0.913196	1.03484	1.11131	1.15969	1.00627	1.05327	1.02161	0.987285	-0.0610706	-0.211128	-0.0706173	0.2932	-0.0357723	0.136974	0.140013	0.224108	-0.131004	0.0494092	0.152265	0.213739	0.00901456
sp|O95551-2|TYDP2_HUMAN	TDP2	TYDP2_HUMAN Isoform 2 of Tyrosyl-DNA phosphodiesterase 2	6	6.53802	6.33758	6.20792	6.06266	6.04378	5.88379	6.41706	5.90778	6.49681	6.54704	6.74508	6.73584	6.14266	5.72288	5.88445	6.32665	6.28655	1.04	1.00812	0.987493	0.964387	0.961383	0.935934	1.02076	0.93975	1.03345	1.04144	1.07294	1.07147	0.977112	0.910338	0.936039	1.00638	0.0565864	0.0116647	-0.0181574	-0.0523164	-0.0568162	-0.0955216	0.0296451	-0.0896512	0.0474642	0.0585754	0.101568	0.0995905	-0.0334038
sp|O15357|SHIP2_HUMAN	INPPL1	SHIP2_HUMAN Phosphatidylinositol 3,4,5-trisphosphate 5-phosphatase 2	29	6.13827	6.37505	6.51389	6.32693	6.00027	5.28705	6.25432	6.35404	6.6937	6.31706	6.17855	6.1466	6.50262	6.30382	6.37656	6.23127	6.33854	0.968405	1.00576	1.02766	0.998169	0.946634	0.834112	0.986714	1.00245	1.05603	0.996612	0.97476	0.969719	1.02589	0.994523	1.006	0.983077	-0.0463173	0.00828722	0.0393699	-0.0026438	-0.079122	-0.261686	-0.0192964	0.00352474	0.0786545	-0.00489616	-0.0368811	-0.0443608	0.0368717
sp|Q6UW63|KDEL1_HUMAN	KDELC1	KDEL1_HUMAN KDEL motif-containing protein 1	13	6.48569	6.28329	6.04198	6.06477	6.26292	6.64212	6.15859	6.37375	6.10424	6.44636	6.3637	6.60996	5.95865	6.0628	6.04008	6.10109	6.21893	1.04289	1.01035	0.971546	0.975211	1.00707	1.06805	0.990297	1.02489	0.981558	1.03657	1.02328	1.06288	0.958147	0.974894	0.971241	0.981051	0.0605931	0.0148532	-0.0416455	-0.036214	0.0101685	0.0949768	-0.0140669	0.0354755	-0.0268553	0.0518178	0.0331989	0.0879746	-0.0616814
sp|Q96P70|IPO9_HUMAN	IPO9	IPO9_HUMAN Importin-9	42	6.4037	6.43193	6.24051	6.2003	6.43345	6.0248	6.38415	5.94027	6.02855	6.17029	6.45412	6.33924	6.31682	6.30613	6.17667	6.14908	6.31911	1.01339	1.01785	0.987562	0.981198	1.01809	0.953425	1.01029	0.940049	0.954019	0.976449	1.02137	1.00319	0.999638	0.997946	0.977459	0.973093	0.0191843	0.0255303	-0.0180574	-0.0273834	0.0258712	-0.068808	0.0147732	-0.0891929	-0.0679103	-0.0343831	0.030499	0.00458851	-0.000522917
sp|P30260-2|CDC27_HUMAN	CDC27	CDC27_HUMAN Isoform 2 of Cell division cycle protein 27 homolog	34	6.60043	6.30321	6.31767	6.24397	6.57604	6.14072	6.05316	6.22305	6.29828	6.25343	5.92676	6.10738	6.15822	6.25834	6.27587	6.26345	6.36632	1.03677	0.990087	0.992358	0.980782	1.03294	0.964564	0.95081	0.977496	0.989313	0.982268	0.930955	0.959327	0.967312	0.983039	0.985792	0.983842	0.0521003	-0.0143729	-0.0110671	-0.0279961	0.0467594	-0.0520519	-0.0727712	-0.0328378	-0.0155018	-0.025812	-0.103216	-0.0599061	-0.0479463
tr|G5EA36|G5EA36_HUMAN	CDC27	G5EA36_HUMAN Cell division cycle 27, isoform CRA_c	2	6.70582	6.79253	6.54739	6.87202	6.70803	6.61223	5.60361	5.82035	5.91331	6.62115	6.28299	6.04654	5.51767	4.81175	6.33439	6.81022	6.72944	0.99649	1.00938	0.972947	1.02119	0.996818	0.982583	0.832701	0.864909	0.878722	0.983908	0.933657	0.898521	0.81993	0.71503	0.941295	1.012	-0.0050727	0.0134626	-0.0395665	0.0302478	-0.00459731	-0.0253495	-0.26413	-0.209381	-0.186521	-0.0234046	-0.0990352	-0.154377	-0.286427
sp|P02786|TFR1_HUMAN	TFRC	TFR1_HUMAN Transferrin receptor protein 1	122	6.48945	5.97901	6.09483	6.52703	6.15582	6.72416	6.6217	6.1738	5.73921	6.31154	6.55213	6.40667	6.2342	6.05666	5.95384	5.97995	6.27258	1.03457	0.953198	0.971662	1.04057	0.981386	1.07199	1.05566	0.984252	0.914968	1.00621	1.04457	1.02138	0.993881	0.965577	0.949185	0.953348	0.0490372	-0.0691523	-0.041473	0.0573677	-0.0271079	0.100295	0.0781427	-0.0229002	-0.128207	0.0089331	0.062905	0.0305157	-0.00885453
sp|Q9UP52|TFR2_HUMAN	TFR2	TFR2_HUMAN Transferrin receptor protein 2	13	6.54459	6.22298	5.934	6.45397	6.11039	6.25436	6.52256	6.28114	5.95386	6.48805	6.60126	6.47595	6.17674	5.9217	6.02974	6.0287	6.28889	1.04066	0.98952	0.943569	1.02625	0.971617	0.99451	1.03716	0.998768	0.946727	1.03167	1.04967	1.02975	0.982168	0.941614	0.958793	0.958628	0.0574986	-0.0151986	-0.0837993	0.0373826	-0.0415398	-0.00794199	0.0526341	-0.00177783	-0.078979	0.0449807	0.0699372	0.0422876	-0.0259587
sp|Q9NP50|FA60A_HUMAN	FAM60A	FA60A_HUMAN Protein FAM60A	4	5.76712	6.46283	6.83898	7.29023	6.38891	5.64445	5.91399	6.52192	6.66919	6.14103	6.02057	5.96093	5.68436	6.53605	6.40088	5.75857	6.58979	0.87516	0.980734	1.03781	1.10629	0.969516	0.856545	0.897447	0.989701	1.01205	0.931901	0.913621	0.904571	0.862601	0.991845	0.971333	0.873862	-0.192381	-0.0280664	0.0535487	0.145732	-0.0446627	-0.223399	-0.156101	-0.0149357	0.0172791	-0.101752	-0.130332	-0.144695	-0.213235
sp|Q01780|EXOSX_HUMAN	EXOSC10	EXOSX_HUMAN Exosome component 10	33	5.513	6.55625	7.26555	5.58303	6.4744	5.4308	5.1234	6.59681	7.72747	6.26271	4.97722	5.24714	6.05901	7.66759	6.67714	6.8385	6.22946	0.884989	1.05246	1.16632	0.896231	1.03932	0.871793	0.822447	1.05897	1.24047	1.00534	0.798981	0.842311	0.972638	1.23086	1.07187	1.09777	-0.176269	0.0737643	0.221965	-0.158058	0.05564	-0.197942	-0.282005	0.082662	0.31089	0.00768055	-0.323766	-0.247575	-0.0400244
sp|O94766|B3GA3_HUMAN	B3GAT3	B3GA3_HUMAN Galactosylgalactosylxylosylprotein 3-beta-glucuronosyltransferase 3	8	6.83603	6.24092	6.31738	6.39876	6.50715	6.19775	6.27275	5.95236	6.04826	6.45601	6.39853	6.11178	5.92274	6.00653	6.08864	6.24442	6.44827	1.06013	0.967844	0.979701	0.992322	1.00913	0.961149	0.97278	0.923094	0.937966	1.0012	0.992286	0.947817	0.9185	0.931494	0.944228	0.968386	0.084246	-0.047154	-0.0295864	-0.0111204	0.0131131	-0.0571682	-0.0398146	-0.115451	-0.0923926	0.0017301	-0.0111722	-0.0773201	-0.122648
sp|P07954|FUMH_HUMAN	FH	FUMH_HUMAN Fumarate hydratase, mitochondrial	84	6.51927	6.17026	5.98563	6.11454	6.52755	6.24615	6.4256	6.06679	6.17037	6.14017	6.68075	6.39014	6.25217	6.05313	6.20982	6.04767	6.19742	1.05193	0.995617	0.965825	0.986626	1.05327	1.00786	1.03682	0.978921	0.995634	0.990761	1.07799	1.0311	1.00883	0.976717	1.002	0.975836	0.0730415	-0.00633762	-0.0501658	-0.0194249	0.0748727	0.0112983	0.0521623	-0.0307355	-0.00631191	-0.0133903	0.108341	0.0441786	0.0126881
sp|Q9Y490|TLN1_HUMAN	TLN1	TLN1_HUMAN Talin-1	181	6.32534	6.28771	6.19152	6.24655	6.50998	5.86281	6.36471	6.18664	6.36141	6.47093	6.2998	6.06491	6.39669	6.18497	6.194	6.05204	6.26278	1.00999	1.00398	0.988622	0.997408	1.03947	0.936135	1.01628	0.987842	1.01575	1.03324	1.00591	0.968405	1.02138	0.987576	0.989018	0.96635	0.0143398	0.00573148	-0.0165096	-0.0037436	0.0558499	-0.0952109	0.0232916	-0.0176471	0.0225434	0.0471699	0.00850283	-0.046317	0.0305224
sp|Q9Y4G6|TLN2_HUMAN	TLN2	TLN2_HUMAN Talin-2	43	6.31439	6.22808	6.02877	6.15814	6.45567	6.08572	6.25593	6.31169	6.15923	6.39146	6.26836	6.05822	6.20595	7.0032	6.14153	5.93369	6.18235	1.02136	1.0074	0.975159	0.996085	1.04421	0.984371	1.0119	1.02092	0.996261	1.03382	1.01391	0.979923	1.00382	1.13277	0.993398	0.95978	0.0304892	0.0106333	-0.0362905	-0.0056595	0.0624127	-0.0227262	0.0170702	0.0298722	-0.00540416	0.0479914	0.0199339	-0.0292602	0.00549791
sp|P18621-3|RL17_HUMAN	RPL17	RL17_HUMAN Isoform 3 of 60S ribosomal protein L17	64	6.00113	6.07488	6.90872	6.06784	6.7758	7.08187	5.50975	6.51818	6.3582	6.02702	5.31206	5.71906	6.09345	6.94264	6.4053	6.20411	6.26314	0.958166	0.969941	1.10308	0.968817	1.08185	1.13072	0.87971	1.04072	1.01518	0.9623	0.848146	0.913129	0.972906	1.10849	1.0227	0.990575	-0.0616525	-0.0440308	0.141532	-0.0457037	0.113505	0.177244	-0.1849	0.0575825	0.0217317	-0.0554419	-0.237615	-0.131109	-0.0396274
sp|O94826|TOM70_HUMAN	TOMM70A	TOM70_HUMAN Mitochondrial import receptor subunit TOM70	68	6.48365	6.15554	6.29572	6.36205	6.50667	5.87271	6.3473	6.07066	6.32702	6.34794	6.39595	6.15492	6.30136	6.00686	6.30472	6.06693	6.32424	1.02521	0.973325	0.99549	1.00598	1.02885	0.928603	1.00365	0.959903	1.00044	1.00375	1.01134	0.973227	0.996382	0.949815	0.996913	0.959314	0.0359141	-0.0390067	-0.00652074	0.00859959	0.0410273	-0.106866	0.00525091	-0.0590387	0.000634038	0.00539637	0.0162665	-0.039152	-0.00522888
sp|Q8N4T8|CBR4_HUMAN	CBR4	CBR4_HUMAN Carbonyl reductase family member 4	10	6.27221	5.95062	6.1057	6.16759	5.89388	6.71204	7.13273	6.09925	6.05479	6.14871	6.80843	6.14881	6.44595	5.82546	6.31805	5.91578	6.12403	1.0242	0.971684	0.997007	1.00711	0.962419	1.09602	1.16471	0.995954	0.988694	1.00403	1.11176	1.00405	1.05257	0.951246	1.03168	0.965995	0.0344925	-0.0414414	-0.00432464	0.0102255	-0.0552637	0.13227	0.219973	-0.0058495	-0.0164044	0.00580241	0.152841	0.00582588	0.0739116
sp|P23381|SYWC_HUMAN	WARS	SYWC_HUMAN Tryptophan--tRNA ligase, cytoplasmic	64	6.40839	5.8351	6.20926	6.66868	6.39556	6.37555	6.79858	5.94972	5.6051	6.05888	6.52468	6.23548	6.45697	6.12861	6.25239	6.09706	6.28036	1.02039	0.929103	0.988679	1.06183	1.01834	1.01516	1.08251	0.947354	0.892481	0.964735	1.0389	0.992854	1.02812	0.975838	0.995547	0.970814	0.0291153	-0.106089	-0.0164253	0.0865545	0.026224	0.0217031	0.114387	-0.0780249	-0.164107	-0.0517956	0.0550605	-0.0103461	0.0400106
sp|P35221-2|CTNA1_HUMAN	CTNNA1	CTNA1_HUMAN Isoform 2 of Catenin alpha-1	42	6.52043	6.07536	6.15565	6.32858	6.41314	6.36658	6.36709	6.09899	5.90358	6.00311	6.68438	6.54853	6.03078	5.89166	6.21759	6.39454	6.27001	1.03994	0.968956	0.981762	1.00934	1.02283	1.0154	1.01548	0.972725	0.941559	0.957433	1.06609	1.04442	0.961846	0.939658	0.99164	1.01986	0.0565005	-0.0454967	-0.0265554	0.0134152	0.0325643	0.022052	0.0221676	-0.0398962	-0.0868765	-0.0627565	0.0923272	0.0627045	-0.056122
sp|Q96C19|EFHD2_HUMAN	EFHD2	EFHD2_HUMAN EF-hand domain-containing protein D2	25	6.64596	6.17506	6.25167	6.03232	6.58823	6.10328	6.30899	6.33524	6.18313	6.12474	6.22102	6.11172	6.36801	6.27205	6.09726	6.18133	6.27625	1.05891	0.983877	0.996083	0.961134	1.04971	0.97244	1.00522	1.0094	0.985163	0.975859	0.9912	0.973785	1.01462	0.99933	0.971481	0.984876	0.0825742	-0.0234502	-0.00566177	-0.0571904	0.0699875	-0.0403186	0.00750567	0.0134959	-0.0215661	-0.0352548	-0.0127523	-0.0383249	0.0209392
sp|Q9Y3B7|RM11_HUMAN	MRPL11	RM11_HUMAN 39S ribosomal protein L11, mitochondrial	18	5.96372	6.78163	7.00607	6.1693	6.45662	5.65273	5.70897	5.78816	7.10601	6.10691	5.60637	5.60043	6.46674	6.72585	6.66396	6.19653	6.48018	0.920302	1.04652	1.08115	0.952026	0.996364	0.872311	0.880989	0.89321	1.09658	0.942398	0.865157	0.86424	0.997926	1.03791	1.02836	0.956228	-0.119821	0.0655982	0.112572	-0.0709271	-0.00525477	-0.197086	-0.182803	-0.162929	0.133006	-0.0855913	-0.208967	-0.210496	-0.00299528
sp|Q96T51|RUFY1_HUMAN	RUFY1	RUFY1_HUMAN RUN and FYVE domain-containing protein 1	34	6.13936	6.42317	6.31971	6.24828	6.32081	5.78473	6.11099	6.15954	6.57659	6.37727	6.38661	6.20067	6.38017	6.22894	6.24751	6.09564	6.28263	0.977196	1.02237	1.0059	0.994533	1.00608	0.92075	0.97268	0.980408	1.04679	1.01506	1.01655	0.986955	1.01553	0.991454	0.99441	0.970237	-0.0332803	0.0319169	0.00848974	-0.00790951	0.00874083	-0.119119	-0.0399625	-0.028546	0.0659711	0.0215703	0.0236817	-0.0189445	0.0222262
sp|Q8WXA3|RUFY2_HUMAN	RUFY2	RUFY2_HUMAN RUN and FYVE domain-containing protein 2	6	5.82047	6.38495	6.66642	6.3422	5.59101	5.5138	6.56909	7.12599	6.42413	6.14765	6.78161	6.27106	5.77454	6.36154	6.44075	5.78477	6.30351	0.92337	1.01292	1.05757	1.00614	0.886968	0.874719	1.04213	1.13048	1.01914	0.975274	1.07585	0.994852	0.916083	1.00921	1.02177	0.917706	-0.11502	0.0185199	0.0807568	0.00882798	-0.173046	-0.193108	0.0595381	0.176935	0.0273457	-0.0361204	0.105472	-0.00744607	-0.126449
sp|Q5VSL9|STRP1_HUMAN	STRIP1	STRP1_HUMAN Striatin-interacting protein 1	20	6.34919	6.41985	6.05493	6.27655	6.36188	5.9039	6.32131	5.89979	6.46662	6.37527	6.25878	6.44852	6.3391	6.37403	6.20773	5.94256	6.27513	1.0118	1.02306	0.964909	1.00023	1.01382	0.940841	1.00736	0.940186	1.03052	1.01596	0.997394	1.02763	1.01019	1.01576	0.989259	0.947002	0.0169272	0.0328942	-0.0515351	0.000326431	0.0198078	-0.0879771	0.0105782	-0.0889817	0.0433665	0.0228411	-0.00376388	0.0393227	0.0146327
sp|Q9ULQ0|STRP2_HUMAN	STRIP2	STRP2_HUMAN Striatin-interacting protein 2	8	6.1585	6.37036	6.21721	6.60626	6.55779	5.90721	6.26459	5.93293	6.0866	6.5257	6.67074	6.0447	5.95342	6.32973	6.50353	5.87072	6.33808	0.971666	1.00509	0.980929	1.04231	1.03466	0.932018	0.988405	0.936076	0.960322	1.0296	1.05249	0.953711	0.939309	0.998682	1.0261	0.926261	-0.0414674	0.00732847	-0.0277791	0.0597873	0.0491633	-0.10157	-0.0168263	-0.0953017	-0.0584099	0.0420862	0.0738004	-0.0683757	-0.0903278
sp|P17544-6|ATF7_HUMAN	ATF7	ATF7_HUMAN Isoform 6 of Cyclic AMP-dependent transcription factor ATF-7	4	5.98628	6.17599	6.5349	6.08446	6.23469	6.20634	5.87825	6.70921	6.67911	6.18224	6.38876	6.20723	5.97378	6.23754	6.1672	6.35402	6.19541	0.966245	0.996866	1.0548	0.982092	1.00634	1.00176	0.948808	1.08293	1.07807	0.997875	1.03121	1.00191	0.964227	1.0068	0.995447	1.0256	-0.0495394	-0.00452876	0.076966	-0.0260699	0.00911865	0.00254356	-0.0758125	0.114944	0.108457	-0.00306952	0.0443368	0.00275043	-0.0525551
sp|Q8NFD5-3|ARI1B_HUMAN	ARID1B	ARI1B_HUMAN Isoform 3 of AT-rich interactive domain-containing protein 1B	22	5.94538	6.35779	6.72521	6.62761	6.27032	5.39701	6.24429	5.84154	6.5033	6.5095	6.10566	6.26385	6.26547	6.30906	6.34828	6.28572	6.414	0.926938	0.991237	1.04852	1.0333	0.977599	0.841442	0.973541	0.910749	1.01392	1.01489	0.951927	0.976591	0.976843	0.983639	0.989754	0.98	-0.109455	-0.0126984	0.0683555	0.0472649	-0.0326847	-0.249063	-0.0386863	-0.134875	0.0199482	0.0213229	-0.0710765	-0.0341741	-0.0338011
sp|O14497|ARI1A_HUMAN	ARID1A	ARI1A_HUMAN AT-rich interactive domain-containing protein 1A	51	6.11995	6.23022	6.46173	6.39419	6.21756	5.27348	6.0195	6.36299	6.5541	6.6681	6.20052	6.15286	6.1794	6.52729	6.33307	6.30504	6.30152	0.971186	0.988685	1.02542	1.01471	0.986676	0.836858	0.955245	1.00975	1.04008	1.05817	0.983972	0.976408	0.98062	1.03583	1.00501	1.00056	-0.0421806	-0.0164173	0.03622	0.0210612	-0.0193519	-0.256945	-0.0660568	0.0140044	0.0566972	0.0815753	-0.0233112	-0.0344433	-0.0282337
sp|Q8TAP8|PPR35_HUMAN	PPP1R35	PPR35_HUMAN Protein phosphatase 1 regulatory subunit 35	6	6.1117	6.23512	6.45284	6.32765	5.87503	6.3725	6.61729	5.91426	5.85763	6.25379	6.44764	6.96119	5.91899	5.94379	6.13999	6.57057	6.28183	0.972918	0.992565	1.02722	1.00729	0.935242	1.01443	1.0534	0.941487	0.932472	0.995537	1.0264	1.10815	0.94224	0.946188	0.977421	1.04596	-0.0396106	-0.010767	0.0387499	0.0104855	-0.0965881	0.0206751	0.0750562	-0.0869867	-0.100867	-0.00645355	0.0375869	0.14815	-0.0858333
sp|P58107|EPIPL_HUMAN	EPPK1	EPIPL_HUMAN Epiplakin	98	5.81203	6.48316	6.83664	6.2873	6.0702	5.24698	6.10521	5.81752	6.87828	6.3131	6.03087	6.07909	6.57355	6.39857	6.53164	6.53586	6.35478	0.914591	1.0202	1.07583	0.989381	0.955218	0.825674	0.960727	0.915455	1.08238	0.993441	0.949029	0.956617	1.03443	1.00689	1.02783	1.02849	-0.128801	0.0288544	0.105445	-0.0154021	-0.0660987	-0.276355	-0.0578018	-0.127438	0.114205	-0.00949414	-0.0754766	-0.0639874	0.04883
sp|Q15149|PLEC_HUMAN	PLEC	PLEC_HUMAN Plectin	216	5.78101	6.73335	6.79511	6.53684	6.2004	5.93125	6.44556	6.67884	6.3171	5.6603	5.57016	5.68096	6.21699	6.35949	6.47882	6.61382	6.46158	0.894675	1.04206	1.05162	1.01165	0.95958	0.917926	0.997521	1.03362	0.977641	0.875994	0.862043	0.879191	0.962147	0.984201	1.00267	1.02356	-0.160565	0.059438	0.0726105	0.016707	-0.0595251	-0.12355	-0.00358071	0.0477111	-0.032624	-0.191008	-0.214168	-0.185752	-0.0556702
sp|Q9UPN3-3|MACF1_HUMAN	MACF1	MACF1_HUMAN Isoform 3 of Microtubule-actin cross-linking factor 1, isoforms 1/2/3/5	276	6.04257	6.42781	6.54319	6.33771	6.42515	5.88103	6.15566	6.39498	6.53905	6.25577	5.8866	5.99106	6.21577	6.39165	6.31284	6.19918	6.33782	0.953415	1.0142	1.0324	0.999983	1.01378	0.927926	0.971258	1.00902	1.03175	0.987054	0.928805	0.945287	0.980743	1.00849	0.996059	0.978125	-0.0688244	0.0203406	0.0460075	-2.50398e-05	0.0197434	-0.107918	-0.0420731	0.0129532	0.0450944	-0.0187992	-0.106552	-0.0811754	-0.0280536
tr|H3BQK9|H3BQK9_HUMAN	MACF1	H3BQK9_HUMAN Microtubule-actin cross-linking factor 1, isoforms 1/2/3/5	36	5.88383	6.36236	6.72246	6.42833	6.24701	5.56965	6.3883	6.44823	6.77869	6.16395	5.78984	5.81628	6.25282	6.71911	6.13952	6.28962	6.34924	0.926698	1.00207	1.05878	1.01246	0.983898	0.877215	1.00615	1.01559	1.06764	0.970816	0.911894	0.916059	0.984813	1.05825	0.966969	0.990609	-0.109829	0.00297696	0.0824042	0.0178589	-0.0234192	-0.188998	0.00884702	0.0223182	0.0944214	-0.0427299	-0.133062	-0.126488	-0.0220781
sp|P46783|RS10_HUMAN	RPS10	RS10_HUMAN 40S ribosomal protein S10	55	6.27819	6.0852	6.24738	6.2505	6.36077	7.06536	5.74352	6.26389	6.15251	6.17477	6.03509	6.17202	6.11279	6.49816	6.37817	6.18168	6.21532	1.01012	0.979065	1.00516	1.00566	1.0234	1.13677	0.924091	1.00781	0.989895	0.993476	0.971003	0.993034	0.983504	1.04551	1.0262	0.994588	0.0145206	-0.0305234	0.00742319	0.00814351	0.0333733	0.184935	-0.113893	0.0112308	-0.014653	-0.00944269	-0.0424528	-0.0100854	-0.0239971
tr|E9PLY5|E9PLY5_HUMAN	MACF1	E9PLY5_HUMAN Microtubule-actin cross-linking factor 1, isoforms 1/2/3/5 (Fragment)	1	5.44003	6.616	6.41367	7.37598	6.95039	5.13355	6.90962	6.80714	5.75003	5.04439	6.25039	6.58566	6.40826	7.13737	5.91087	5.26666	6.46142	0.841925	1.02392	0.99261	1.14154	1.07568	0.794493	1.06937	1.05351	0.889902	0.780694	0.96734	1.01923	0.991773	1.10461	0.914794	0.815093	-0.248237	0.034108	-0.0107011	0.190983	0.105243	-0.331894	0.0967551	0.0751975	-0.168282	-0.357171	-0.047905	0.0274768	-0.0119186
sp|Q03001|DYST_HUMAN	DST	DYST_HUMAN Dystonin	19	6.02393	6.19979	5.87835	6.11665	6.03489	6.26979	6.11019	7.17835	6.4015	6.44676	6.37046	6.57443	5.89058	6.745	5.85441	5.90493	6.05468	0.994921	1.02397	0.970877	1.01024	0.996731	1.03553	1.00917	1.18559	1.05728	1.06476	1.05215	1.08584	0.972897	1.11401	0.966923	0.975267	-0.00734571	0.0341686	-0.0426395	0.014691	-0.00472324	0.0503664	0.0131665	0.245602	0.0803593	0.0905236	0.0733468	0.118815	-0.039641
sp|Q9NZJ9|NUDT4_HUMAN	NUDT4	NUDT4_HUMAN Diphosphoinositol polyphosphate phosphohydrolase 2	18	6.39913	6.37128	6.42339	6.45663	5.98636	5.66953	6.39313	6.01594	6.27786	6.44198	6.50733	6.21552	6.35266	6.02291	6.39738	6.06898	6.41261	0.997898	0.993555	1.00168	1.00686	0.93353	0.884122	0.996963	0.938143	0.978987	1.00458	1.01477	0.969266	0.990652	0.939229	0.997625	0.946414	-0.00303533	-0.00932786	0.00242379	0.00987025	-0.0992321	-0.177682	-0.00438868	-0.0921209	-0.0306382	0.00659308	0.0211546	-0.045036	-0.0135503
sp|O95989|NUDT3_HUMAN	NUDT3	NUDT3_HUMAN Diphosphoinositol polyphosphate phosphohydrolase 1	8	6.58554	6.06376	5.84282	6.64128	6.39818	6.49951	6.78737	6.17305	5.93106	6.29028	6.76793	6.05317	6.16216	6.12814	5.82346	5.85229	6.28335	1.04809	0.965052	0.929889	1.05696	1.01828	1.0344	1.08022	0.982446	0.943933	1.0011	1.07712	0.963367	0.980713	0.975298	0.926808	0.931396	0.0677678	-0.0513213	-0.104869	0.0799274	0.0261276	0.048797	0.111319	-0.0255505	-0.083244	0.00159029	0.107181	-0.0538431	-0.0280978
tr|H0YD69|H0YD69_HUMAN	MACF1	H0YD69_HUMAN Microtubule-actin cross-linking factor 1, isoforms 1/2/3/5 (Fragment)	1	5.57094	6.66312	7.23726	8.00324	5.83358	5.7246	6.20509	5.73496	6.63032	6.4403	5.64572	5.1267	5.57054	7.35323	6.74797	5.51243	6.86864	0.811069	0.970079	1.05367	1.16519	0.849306	0.83344	0.903394	0.834948	0.965303	0.937638	0.821956	0.746392	0.811011	1.07055	0.982432	0.80255	-0.302104	-0.0438266	0.0754191	0.22056	-0.235643	-0.26285	-0.146572	-0.260241	-0.050946	-0.0928966	-0.282867	-0.421994	-0.302207
sp|P08107|HSP71_HUMAN	HSPA1A	HSP71_HUMAN Heat shock 70 kDa protein 1A/1B	231	6.41753	5.95584	5.86002	6.21554	6.37132	6.5484	6.30966	6.17505	6.08798	6.2568	6.63802	6.40639	6.32451	6.26566	6.19889	5.96837	6.11223	1.04995	0.974413	0.958736	1.0169	1.04239	1.07136	1.0323	1.01028	0.996032	1.02365	1.08602	1.04813	1.03473	1.0251	1.01418	0.976463	0.0703187	-0.0373944	-0.0607938	0.0241803	0.0598929	0.099443	0.0458628	0.0147514	-0.0057358	0.0337256	0.119054	0.0678122	0.0492543
sp|P34931|HS71L_HUMAN	HSPA1L	HS71L_HUMAN Heat shock 70 kDa protein 1-like	6	6.57692	5.91249	6.26881	6.23112	6.20768	6.42535	6.68408	6.49894	5.71676	6.47769	6.83368	6.26761	5.90765	6.31479	5.66587	6.01055	6.24734	1.05276	0.946402	1.00344	0.997404	0.993652	1.02849	1.06991	1.04027	0.915072	1.03687	1.09386	1.00325	0.945627	1.0108	0.906926	0.962098	0.0741712	-0.0794751	0.00495071	-0.00374939	-0.0091867	0.0405341	0.0974881	0.0569635	-0.128043	0.0522385	0.129422	0.00467452	-0.0806565
sp|P11021|GRP78_HUMAN	HSPA5	GRP78_HUMAN 78 kDa glucose-regulated protein	168	6.4581	6.00943	5.89123	6.35264	6.34878	6.75692	6.55848	6.35236	5.82232	6.37926	6.44386	6.19057	6.2151	6.07623	6.08262	6.0621	6.17785	1.04536	0.972738	0.953605	1.02829	1.02767	1.09373	1.06161	1.02825	0.942451	1.0326	1.04306	1.00206	1.00603	0.983551	0.984585	0.981264	0.0640049	-0.0398767	-0.068536	0.0402514	0.0393745	0.129261	0.0862567	0.0401878	-0.0855107	0.0462842	0.0608203	0.00296741	0.00867276
sp|P38646|GRP75_HUMAN	HSPA9	GRP75_HUMAN Stress-70 protein, mitochondrial	217	6.40453	6.03429	5.95348	6.40592	6.3398	6.81451	6.64797	6.27195	5.7381	6.17754	6.55911	6.21683	6.34992	5.92318	6.16556	5.99732	6.19956	1.03306	0.973342	0.960308	1.03329	1.02262	1.09919	1.07233	1.01168	0.925566	0.996449	1.058	1.00279	1.02425	0.95542	0.994517	0.967379	0.046928	-0.0389806	-0.0584314	0.0472411	0.0322727	0.136445	0.100749	0.0167494	-0.111592	-0.00513222	0.0813354	0.00401447	0.0345738
sp|P11142|HSP7C_HUMAN	HSPA8	HSP7C_HUMAN Heat shock cognate 71 kDa protein	480	6.36084	6.00443	6.06364	6.23988	6.43262	6.49647	6.47913	6.42843	5.9405	6.28151	6.38572	6.23492	6.32986	6.14715	6.17462	6.00028	6.1672	1.0314	0.973608	0.983208	1.01179	1.04304	1.05339	1.05058	1.04236	0.963241	1.01854	1.03543	1.01098	1.02638	0.996749	1.0012	0.972935	0.0446022	-0.0385878	-0.0244309	0.0169032	0.0607914	0.075041	0.0711851	0.0598514	-0.0540307	0.0264964	0.0502342	0.015756	0.0375585
tr|E9PN89|E9PN89_HUMAN	HSPA8	E9PN89_HUMAN Heat shock cognate 71 kDa protein (Fragment)	1	6.42613	5.62229	5.98702	5.73183	6.20737	6.17449	7.26535	7.09654	5.89147	6.09299	6.2651	7.04144	5.73422	7.09636	5.35206	6.01533	5.94182	1.08151	0.946224	1.00761	0.964659	1.04469	1.03916	1.22275	1.19434	0.991527	1.02544	1.05441	1.18507	0.965062	1.19431	0.900745	1.01237	0.113046	-0.0797464	0.0109338	-0.0519085	0.0630778	0.0554157	0.290128	0.256211	-0.0122766	0.0362461	0.0764332	0.244966	-0.051307
sp|Q96NB2|SFXN2_HUMAN	SFXN2	SFXN2_HUMAN Sideroflexin-2	8	6.09981	5.78624	6.58487	6.44623	5.77497	6.14729	6.66629	6.44082	6.0768	6.1981	6.07265	6.58822	6.18116	6.54528	6.18791	6.20336	6.22929	0.979215	0.928877	1.05708	1.03483	0.927068	0.986837	1.07015	1.03396	0.975521	0.994993	0.974855	1.05762	0.992274	1.05073	0.993358	0.995838	-0.0303029	-0.106441	0.0800878	0.0493885	-0.109254	-0.0191166	0.0978169	0.0481772	-0.0357553	-0.00724113	-0.0367409	0.0808216	-0.0111895
sp|Q9Y618|NCOR2_HUMAN	NCOR2	NCOR2_HUMAN Nuclear receptor corepressor 2	26	6.28867	6.21641	6.25491	6.68454	6.21271	5.6772	6.14577	6.76536	5.97089	6.45	6.49172	6.50526	6.21894	6.04969	5.98603	6.08192	6.36113	0.988609	0.977249	0.983301	1.05084	0.976667	0.892483	0.966144	1.06355	0.938652	1.01397	1.02053	1.02266	0.977647	0.95104	0.941032	0.956106	-0.0165287	-0.033202	-0.0242945	0.0715446	-0.0340609	-0.164104	-0.0496899	0.0888831	-0.0913376	0.0200155	0.0293171	0.0323231	-0.0326149
sp|O75376|NCOR1_HUMAN	NCOR1	NCOR1_HUMAN Nuclear receptor corepressor 1	24	6.04061	6.25195	6.2624	6.52907	6.10242	5.80453	6.40897	6.23498	6.35026	6.44153	6.32625	6.32526	6.12394	6.04744	6.40335	6.34704	6.27101	0.96326	0.996961	0.998627	1.04115	0.973116	0.925614	1.022	0.994255	1.01264	1.02719	1.00881	1.00865	0.976548	0.964349	1.0211	1.01212	-0.054003	-0.004391	-0.00198158	0.0581803	-0.0393158	-0.111518	0.0313953	-0.00831231	0.0181184	0.0387062	0.0126533	0.0124275	-0.0342371
sp|Q8TAE8|G45IP_HUMAN	GADD45GIP1	G45IP_HUMAN Growth arrest and DNA damage-inducible proteins-interacting protein 1	13	6.37097	6.29455	6.83977	6.35222	6.28866	6.42046	5.96747	6.19862	6.10693	5.8689	6.3593	6.07799	6.0186	6.37622	6.31355	6.1458	6.46438	0.98555	0.973729	1.05807	0.98265	0.972818	0.993206	0.923131	0.958889	0.944705	0.907883	0.983745	0.940228	0.931041	0.986363	0.976668	0.950718	-0.0209984	-0.0384082	0.0814364	-0.0252506	-0.0397588	-0.00983479	-0.115392	-0.0605644	-0.0820641	-0.139421	-0.0236435	-0.0889171	-0.103084
sp|Q7L2E3-2|DHX30_HUMAN	DHX30	DHX30_HUMAN Isoform 2 of Putative ATP-dependent RNA helicase DHX30	69	4.98689	7.76397	7.99703	4.7054	5.22772	4.99206	4.30366	4.95111	10.2586	5.2505	4.28308	4.93658	7.92911	7.43971	7.83471	7.13984	6.36332	0.783693	1.22011	1.25674	0.739456	0.821539	0.784505	0.676323	0.77807	1.61215	0.825119	0.673089	0.775787	1.24606	1.16915	1.23123	1.12203	-0.35164	0.287014	0.329684	-0.435463	-0.283598	-0.350145	-0.564216	-0.362028	0.688982	-0.277325	-0.571132	-0.366268	0.317379
sp|Q7L2E3|DHX30_HUMAN	DHX30	DHX30_HUMAN Putative ATP-dependent RNA helicase DHX30	1	7.4156	5.29515	6.98978	7.18966	7.103	5.96761	5.65628	7.98304	6.16466	4.63099	5.80149	6.01045	6.89897	6.31425	5.49672	5.08236	6.72255	1.10309	0.78767	1.03975	1.06948	1.05659	0.887701	0.841389	1.1875	0.917012	0.688874	0.86299	0.894073	1.02624	0.939264	0.817654	0.756017	0.141555	-0.344336	0.056239	0.0969155	0.0794204	-0.171855	-0.249155	0.24793	-0.124987	-0.537687	-0.212585	-0.161535	0.0373729
sp|Q16853|AOC3_HUMAN	AOC3	AOC3_HUMAN Membrane primary amine oxidase	1	6.51126	7.23404	7.51678	7.44131	5.12226	9.37669	6.18608	7.34036	3.50752	6.24074	6.54263	6.34211	4.97921	6.00214	4.76922	4.88766	7.17585	0.907386	1.00811	1.04751	1.03699	0.71382	1.3067	0.86207	1.02293	0.488795	0.869687	0.911757	0.883813	0.693885	0.836436	0.664621	0.681127	-0.140212	0.0116523	0.0669655	0.0524074	-0.486369	0.38593	-0.214124	0.0327016	-1.0327	-0.201432	-0.133279	-0.178186	-0.527232
sp|O15269|SPTC1_HUMAN	SPTLC1	SPTC1_HUMAN Serine palmitoyltransferase 1	19	6.408	6.34668	6.61033	6.2878	6.51292	5.94949	6.34493	5.84578	6.28837	6.15348	6.33415	6.11574	6.23229	6.21374	6.2652	6.09107	6.4132	0.999189	0.989627	1.03074	0.980446	1.01555	0.927694	0.989354	0.911523	0.980535	0.959502	0.987673	0.953617	0.971791	0.968898	0.976922	0.94977	-0.00117081	-0.0150429	0.0436773	-0.0284896	0.0222595	-0.108279	-0.0154407	-0.133649	-0.0283589	-0.0596424	-0.0178939	-0.0685179	-0.0412826
sp|Q14008|CKAP5_HUMAN	CKAP5	CKAP5_HUMAN Cytoskeleton-associated protein 5	156	6.18568	6.42007	6.53707	6.12363	6.4491	5.7383	5.92691	6.02233	6.79514	6.37207	5.88124	5.99359	6.4017	6.41756	6.39937	6.33624	6.31661	0.979272	1.01638	1.0349	0.969448	1.02097	0.908446	0.938305	0.953411	1.07576	1.00878	0.931075	0.948861	1.01347	1.01598	1.0131	1.00311	-0.0302189	0.023438	0.0494931	-0.044764	0.0299468	-0.138528	-0.0918709	-0.0688293	0.105352	0.012611	-0.103031	-0.0757307	0.019304
sp|Q7Z392|TPC11_HUMAN	TRAPPC11	TPC11_HUMAN Trafficking protein particle complex subunit 11	32	6.00995	6.21675	6.39606	6.62467	6.31946	6.56403	6.25516	6.22512	6.23527	6.25328	6.21855	6.17204	6.32261	6.13197	6.00476	6.0503	6.31186	0.952168	0.984932	1.01334	1.04956	1.0012	1.03995	0.991017	0.986258	0.987866	0.990719	0.985217	0.977848	1.0017	0.9715	0.951346	0.958561	-0.0707116	-0.0219041	0.0191188	0.069784	0.00173665	0.0565172	-0.0130178	-0.019963	-0.0176126	-0.0134515	-0.0214864	-0.0323172	0.0024556
sp|P31948|STIP1_HUMAN	STIP1	STIP1_HUMAN Stress-induced-phosphoprotein 1	201	6.70204	5.95213	5.99146	6.37768	6.50606	6.42763	6.54532	6.3429	5.80844	6.15921	6.47494	6.24153	6.31846	6.06666	6.1349	5.95064	6.25583	1.07133	0.951454	0.957741	1.01948	1.04	1.02746	1.04628	1.01392	0.928485	0.984556	1.03503	0.997715	1.01001	0.969761	0.98067	0.951215	0.0993996	-0.0717947	-0.0622931	0.027831	0.0565834	0.0390862	0.065263	0.0199419	-0.10705	-0.0224554	0.0496661	-0.00330101	0.0143722
sp|Q13423|NNTM_HUMAN	NNT	NNTM_HUMAN NAD(P) transhydrogenase, mitochondrial	72	6.63102	6.10483	5.90738	6.17505	6.54783	6.5247	6.51709	6.15659	6.00799	6.19738	6.46441	6.33951	6.20556	6.06356	6.03436	6.12273	6.20457	1.06873	0.983925	0.952101	0.995242	1.05532	1.0516	1.05037	0.992267	0.968317	0.998841	1.04188	1.02175	1.00016	0.977273	0.972567	0.98681	0.0958996	-0.0233801	-0.0708128	-0.00688041	0.0776856	0.0725803	0.0708967	-0.0111997	-0.0464488	-0.0016728	0.0591875	0.0310401	0.000230178
sp|P35251|RFC1_HUMAN	RFC1	RFC1_HUMAN Replication factor C subunit 1	25	5.68515	6.26441	7.30519	6.09107	6.37125	5.58651	5.08036	6.46786	7.36386	6.40913	5.11749	5.79937	6.02013	6.99462	6.67161	6.77198	6.33646	0.897213	0.98863	1.15288	0.961274	1.00549	0.881646	0.801767	1.02074	1.16214	1.01147	0.807627	0.915239	0.950079	1.10387	1.05289	1.06873	-0.156478	-0.0164973	0.205246	-0.0569803	0.00790051	-0.181729	-0.318745	0.0296125	0.216786	0.0164526	-0.30824	-0.12778	-0.0738813
sp|Q92575|UBXN4_HUMAN	UBXN4	UBXN4_HUMAN UBX domain-containing protein 4	10	6.45756	6.0314	6.11329	6.29746	6.25317	6.03693	6.38651	6.05378	6.22322	6.11067	6.78269	6.76578	6.08505	6.30802	6.16897	5.92552	6.22493	1.03737	0.968911	0.982066	1.01165	1.00454	0.969799	1.02596	0.972506	0.999726	0.981645	1.0896	1.08688	0.977529	1.01335	0.991011	0.951902	0.0529321	-0.0455641	-0.026108	0.016713	0.0065307	-0.044242	0.0369707	-0.0402208	-0.000395786	-0.0267265	0.123801	0.120199	-0.0327879
sp|O95273|CCDB1_HUMAN	CCNDBP1	CCDB1_HUMAN Cyclin-D1-binding protein 1	7	6.18817	6.3136	6.16918	6.24185	5.6524	6.17368	6.24278	6.12638	6.40712	5.94158	6.45077	6.36746	6.55471	6.22057	6.51617	6.43358	6.2282	0.993573	1.01371	0.990524	1.00219	0.90755	0.991246	1.00234	0.983652	1.02873	0.95398	1.03574	1.02236	1.05242	0.998775	1.04624	1.03298	-0.00930244	0.0196476	-0.0137365	0.00315841	-0.139952	-0.0126846	0.00337335	-0.0237804	0.0408607	-0.0679686	0.0506561	0.0319027	0.0737167
sp|P52848|NDST1_HUMAN	NDST1	NDST1_HUMAN Bifunctional heparan sulfate N-deacetylase/N-sulfotransferase 1	10	6.25333	5.94438	6.24172	6.55112	6.27637	6.36437	6.60369	5.91637	6.05943	6.32873	6.62931	6.40675	5.93489	6.2001	6.04392	6.24552	6.24764	1.00091	0.95146	0.999053	1.04858	1.0046	1.01868	1.05699	0.946977	0.969875	1.01298	1.06109	1.02547	0.949941	0.992391	0.967393	0.999661	0.00131391	-0.0717844	-0.00136711	0.0684308	0.00661966	0.026707	0.0799616	-0.0785985	-0.0441287	0.0186053	0.085548	0.0362819	-0.0740895
sp|Q96GI7|FA89A_HUMAN	FAM89A	FA89A_HUMAN Protein FAM89A	2	5.18673	6.47208	6.48176	6.6913	3.72934	6.34024	5.9379	6.63229	7.12092	7.22243	5.85587	6.3211	6.3518	6.35475	7.31036	5.99112	6.20797	0.835496	1.04254	1.0441	1.07786	0.600734	1.02131	0.956497	1.06835	1.14706	1.16341	0.943283	1.01822	1.02317	1.02364	1.17758	0.965069	-0.259296	0.0601084	0.0622646	0.108166	-0.735201	0.0304164	-0.0641682	0.0953861	0.197943	0.218363	-0.0842375	0.0260546	0.0330445
sp|O60885|BRD4_HUMAN	BRD4	BRD4_HUMAN Bromodomain-containing protein 4	45	6.31493	6.08809	6.1841	6.61967	6.04358	5.27661	6.44661	6.18198	6.27065	6.72512	6.54874	6.45491	6.34211	6.0395	6.26192	6.20148	6.3017	1.0021	0.966103	0.981339	1.05046	0.95904	0.837332	1.023	0.981002	0.995073	1.06719	1.0392	1.02431	1.00641	0.958393	0.993688	0.984097	0.00302624	-0.0497508	-0.0271769	0.0710188	-0.0603371	-0.256129	0.0328002	-0.0276715	-0.00712551	0.0938195	0.0554769	0.0346565	0.0092224
sp|Q15059|BRD3_HUMAN	BRD3	BRD3_HUMAN Bromodomain-containing protein 3	19	6.11705	6.09291	6.12926	6.39124	6.13924	5.72094	6.28063	6.27586	6.29867	6.83581	6.62522	6.572	6.35981	5.7857	6.21826	6.15738	6.18261	0.989395	0.985491	0.99137	1.03374	0.992984	0.925327	1.01585	1.01508	1.01877	1.10565	1.07159	1.06298	1.02866	0.935801	1.00577	0.995918	-0.0153811	-0.0210857	-0.0125043	0.0478787	-0.0101571	-0.111965	0.0226921	0.021596	0.0268301	0.144895	0.0997512	0.0881153	0.0407665
sp|P25440-2|BRD2_HUMAN	BRD2	BRD2_HUMAN Isoform 2 of Bromodomain-containing protein 2	20	6.35058	6.03976	6.16962	6.57375	6.0694	5.47034	6.67469	6.25581	6.27591	6.46962	6.57111	6.43609	6.18212	6.3174	6.09983	6.044	6.28343	1.01069	0.961221	0.981888	1.0462	0.965938	0.870598	1.06227	0.995605	0.998804	1.02963	1.04578	1.0243	0.983877	1.00541	0.970781	0.961895	0.0153366	-0.0570605	-0.0263701	0.0651649	-0.0499978	-0.199921	0.0871491	-0.00635504	-0.00172708	0.0421292	0.0645854	0.0346328	-0.0234501
sp|Q9BWH6|RPAP1_HUMAN	RPAP1	RPAP1_HUMAN RNA polymerase II-associated protein 1	37	6.35866	6.1373	6.32617	6.54101	6.18966	5.61244	6.45577	5.77784	6.27595	6.25397	6.57465	6.41697	6.3396	6.39752	6.37678	5.9657	6.34079	1.00282	0.967909	0.997695	1.03158	0.976166	0.885133	1.01813	0.911218	0.989775	0.986308	1.03688	1.01202	0.999813	1.00895	1.00568	0.940846	0.00406131	-0.0470574	-0.00332913	0.044852	-0.0348013	-0.176033	0.0259277	-0.134131	-0.0148276	-0.0198892	0.0522526	0.0172308	-0.000269644
sp|P98172|EFNB1_HUMAN	EFNB1	EFNB1_HUMAN Ephrin-B1	3	6.15527	6.34092	6.21292	6.51169	6.29005	6.44787	6.70145	6.31534	5.83148	6.17295	6.41121	6.61502	6.07118	5.90748	5.91747	6.0977	6.3052	0.976221	1.00567	0.985364	1.03275	0.997597	1.02263	1.06284	1.00161	0.924868	0.979025	1.01681	1.04914	0.962885	0.936922	0.938506	0.967091	-0.03472	0.00815004	-0.0212707	0.0464899	-0.00347065	0.0322805	0.0879312	0.00231827	-0.11268	-0.030582	0.0240545	0.0692034	-0.0545652
sp|Q9NV92|NFIP2_HUMAN	NDFIP2	NFIP2_HUMAN NEDD4 family-interacting protein 2	2	6.42466	5.76643	5.96856	6.47673	5.80506	7.00694	5.48576	6.70197	6.38169	6.58069	6.87906	6.71581	5.99837	6.60837	5.29406	5.90584	6.15909	1.04312	0.936246	0.969064	1.05157	0.942518	1.13766	0.890676	1.08814	1.03614	1.06845	1.11689	1.09039	0.973904	1.07294	0.859552	0.958881	0.0609017	-0.09504	-0.0453355	0.0725472	-0.0854074	0.186066	-0.167027	0.121867	0.0512201	0.0955205	0.159493	0.124843	-0.0381479
sp|Q14498|RBM39_HUMAN	RBM39	RBM39_HUMAN RNA-binding protein 39	37	6.27299	6.4718	6.6714	6.41331	6.22021	5.78179	6.21854	6.78716	6.40351	6.20141	5.77424	6.06423	5.94519	6.09497	6.31866	6.36057	6.45737	0.971446	1.00223	1.03314	0.993176	0.963272	0.895378	0.963014	1.05107	0.991658	0.960361	0.894209	0.939117	0.920682	0.943877	0.978518	0.985009	-0.0417945	0.00321921	0.0470417	-0.00987867	-0.0539845	-0.159432	-0.0543719	0.0718602	-0.0120849	-0.0583515	-0.161317	-0.0906233	-0.119225
sp|Q86U06|RBM23_HUMAN	RBM23	RBM23_HUMAN Probable RNA-binding protein 23	7	6.16098	5.90895	6.7496	6.62167	5.97049	5.79367	6.02985	6.58523	6.20374	6.6703	6.08921	6.24822	6.0499	6.45712	6.3603	6.10077	6.3603	0.968662	0.929036	1.06121	1.04109	0.938712	0.910911	0.948045	1.03536	0.975385	1.04874	0.957378	0.982378	0.951197	1.01522	1	0.959195	-0.045935	-0.106193	0.0857072	0.0581003	-0.0912455	-0.134617	-0.0769727	0.050139	-0.0359566	0.0686568	-0.0628397	-0.0256496	-0.0721835
sp|Q15042|RB3GP_HUMAN	RAB3GAP1	RB3GP_HUMAN Rab3 GTPase-activating protein catalytic subunit	41	6.06339	6.21722	6.30477	6.02723	6.29457	5.656	6.13799	5.97332	6.6541	6.50208	6.41761	6.27468	6.44347	6.53057	6.24345	6.25955	6.15315	0.985412	1.01041	1.02464	0.979535	1.02298	0.919204	0.997536	0.970774	1.08141	1.05671	1.04298	1.01975	1.04718	1.06134	1.01467	1.01729	-0.0212011	0.0149439	0.035118	-0.0298306	0.0327821	-0.121544	-0.00355945	-0.0427927	0.112918	0.0795756	0.0607104	0.0282161	0.0665121
sp|Q9NX63|CHCH3_HUMAN	CHCHD3	CHCH3_HUMAN Coiled-coil-helix-coiled-coil-helix domain-containing protein 3, mitochondrial	31	6.41792	5.95087	6.30058	6.54544	6.21217	6.59516	6.75834	6.36061	5.54153	6.17137	6.30678	6.45588	6.17831	6.12165	6.08878	5.9946	6.3037	1.01812	0.944028	0.999505	1.03835	0.98548	1.04624	1.07212	1.00903	0.879091	0.979007	1.00049	1.02414	0.980108	0.97112	0.965905	0.950965	0.0259064	-0.0830988	-0.000714807	0.0542907	-0.0211021	0.0652082	0.100469	0.0129657	-0.185915	-0.0306087	0.000704159	0.0344143	-0.0289872
sp|Q969S8|HDA10_HUMAN	HDAC10	HDA10_HUMAN Histone deacetylase 10	2	6.5337	5.50988	5.87469	6.85487	6.66585	6.52365	6.40918	7.30664	5.71622	6.18931	5.98746	5.96873	5.35942	6.41834	6.49127	6.19079	6.19328	1.05497	0.889654	0.948558	1.10682	1.0763	1.05334	1.03486	1.17977	0.922971	0.999358	0.966766	0.963742	0.86536	1.03634	1.04811	0.999597	0.0771954	-0.168684	-0.0761921	0.146424	0.106084	0.0749745	0.049435	0.238503	-0.115643	-0.000926254	-0.0487607	-0.0532808	-0.208628
sp|P26641|EF1G_HUMAN	EEF1G	EF1G_HUMAN Elongation factor 1-gamma	86	6.51318	6.31592	6.0445	5.9884	6.73179	6.03464	6.12274	6.0066	6.4509	6.42731	6.20385	6.07132	6.39884	6.26895	6.35182	6.06923	6.2155	1.04789	1.01616	0.972488	0.963462	1.08306	0.970902	0.985076	0.96639	1.03787	1.03408	0.998126	0.976803	1.0295	1.0086	1.02193	0.976467	0.0674916	0.0231224	-0.0402474	-0.0536999	0.11512	-0.0426027	-0.021693	-0.0493219	0.05363	0.0483446	-0.00270665	-0.0338602	0.0419399
sp|P20810-6|ICAL_HUMAN	CAST	ICAL_HUMAN Isoform 6 of Calpastatin	50	6.56209	5.78743	5.73996	6.44155	6.046	6.57371	6.64277	6.55802	5.63103	6.4247	6.49025	6.6581	6.22085	6.00369	6.19338	6.02647	6.13276	1.07001	0.943691	0.935951	1.05035	0.985853	1.0719	1.08316	1.06934	0.918189	1.0476	1.05829	1.08566	1.01436	0.978954	1.00989	0.982669	0.0976195	-0.0836131	-0.0954952	0.070872	-0.0205549	0.100172	0.115249	0.0967244	-0.123137	0.0670932	0.0817381	0.118575	0.0205758
sp|P31350-2|RIR2_HUMAN	RRM2	RIR2_HUMAN Isoform 2 of Ribonucleoside-diphosphate reductase subunit M2	72	6.75715	5.99398	6.05238	6.41039	6.33625	6.47997	6.73982	5.92158	5.63815	6.09636	6.60216	6.1732	6.35037	6.14566	6.17427	6.12832	6.30347	1.07197	0.950901	0.960166	1.01696	1.0052	1.028	1.06922	0.939415	0.894451	0.967143	1.04738	0.979333	1.00744	0.974964	0.979503	0.972213	0.100267	-0.0726331	-0.0586448	0.0242647	0.00748188	0.0398398	0.0965627	-0.0901652	-0.160926	-0.0481993	0.0667907	-0.0301288	0.0106933
sp|Q7LG56-6|RIR2B_HUMAN	RRM2B	RIR2B_HUMAN Isoform 6 of Ribonucleoside-diphosphate reductase subunit M2 B	7	6.58636	5.97909	6.07526	6.22893	6.07323	6.47291	6.70124	6.02029	5.91087	6.23954	6.90469	6.62018	6.23815	5.82223	6.10471	6.02233	6.21741	1.05934	0.961669	0.977137	1.00185	0.97681	1.04109	1.07782	0.968295	0.950697	1.00356	1.11054	1.06478	1.00334	0.93644	0.981873	0.968624	0.0831677	-0.0563878	-0.0333676	0.00267064	-0.0338497	0.0581007	0.108114	-0.0464807	-0.0729432	0.00512595	0.151263	0.0905567	0.00480452
sp|Q16643-3|DREB_HUMAN	DBN1	DREB_HUMAN Isoform 3 of Drebrin	24	6.12561	6.86258	6.91926	4.85368	5.49781	6.00844	5.00806	5.79063	8.38759	5.27635	5.24755	5.62152	7.12731	6.67677	7.26245	7.33439	6.19028	0.989553	1.10861	1.11776	0.784081	0.888136	0.970625	0.80902	0.935439	1.35496	0.85236	0.847708	0.90812	1.15137	1.07859	1.1732	1.18482	-0.0151517	0.148746	0.160613	-0.350926	-0.171148	-0.0430148	-0.305753	-0.0962849	0.438251	-0.230465	-0.238361	-0.139045	0.203352
tr|D6RCR4|D6RCR4_HUMAN	DBN1	D6RCR4_HUMAN Drebrin (Fragment)	1	6.0732	6.83337	7.14315	5.41709	5.63092	6.52624	3.89495	6.1072	8.9523	5.74662	5.85003	6.41176	6.41639	7.64462	5.37576	5.97641	6.3667	0.9539	1.0733	1.12195	0.850847	0.884433	1.02506	0.611769	0.959241	1.40611	0.902605	0.918848	1.00708	1.0078	1.20072	0.844355	0.938698	-0.0680895	0.102051	0.166014	-0.233028	-0.177176	0.0357057	-0.708942	-0.0600353	0.491712	-0.147833	-0.122102	0.0101741	0.0112155
sp|Q8TF74|WIPF2_HUMAN	WIPF2	WIPF2_HUMAN WAS/WASL-interacting protein family member 2	10	6.65957	5.95392	6.25012	6.6182	5.86605	6.33245	6.55318	6.67457	5.85317	6.43607	6.74685	6.07927	6.04328	5.87369	6.00912	6.05048	6.37045	1.04538	0.934615	0.981111	1.03889	0.920822	0.994035	1.02868	1.04774	0.9188	1.0103	1.05908	0.954292	0.948642	0.922021	0.94328	0.949772	0.0640332	-0.097556	-0.027512	0.055043	-0.119006	-0.00863207	0.0407993	0.067279	-0.122178	0.0147842	0.0828182	-0.0674978	-0.0760641
sp|P53618|COPB_HUMAN	COPB1	COPB_HUMAN Coatomer subunit beta	74	6.25867	6.06333	6.12254	6.17306	6.37868	6.05911	6.41452	6.89004	6.09509	6.21826	6.433	6.43505	6.22223	6.07705	5.97163	6.18776	6.1544	1.01694	0.985202	0.994823	1.00303	1.03644	0.984517	1.04227	1.11953	0.990363	1.01038	1.04527	1.0456	1.01102	0.987432	0.970303	1.00542	0.0242379	-0.0215079	-0.00748792	0.0043676	0.0516397	-0.0225123	0.0597231	0.162894	-0.0139707	0.0148927	0.0638735	0.0643331	0.0158135
sp|O95801|TTC4_HUMAN	TTC4	TTC4_HUMAN Tetratricopeptide repeat protein 4	25	6.09893	6.30084	6.47565	6.4201	6.44348	5.601	6.29066	5.72835	6.37926	6.43433	6.44846	6.18289	6.40834	6.19268	6.38577	6.20927	6.32388	0.964428	0.996357	1.024	1.01522	1.01891	0.88569	0.994747	0.905828	1.00876	1.01747	1.0197	0.977705	1.01336	0.979253	1.00979	0.981877	-0.0522538	-0.00526582	0.034215	0.0217858	0.0270301	-0.175126	-0.0075986	-0.14269	0.0125791	0.0249799	0.0281447	-0.0325287	0.0191407
sp|P57086|SCND1_HUMAN	SCAND1	SCND1_HUMAN SCAN domain-containing protein 1	2	5.49252	6.89871	6.53771	5.27512	4.81523	6.34845	5.03179	5.47802	4.96816	6.28653	9.67501	8.47836	4.76716	7.28304	7.40007	5.26411	6.05102	0.907702	1.14009	1.08043	0.871774	0.795772	1.04915	0.831561	0.905306	0.821046	1.03892	1.59891	1.40115	0.787828	1.20361	1.22295	0.869955	-0.139709	0.189149	0.111608	-0.197973	-0.329572	0.0692272	-0.266105	-0.143523	-0.284466	0.0550867	0.677086	0.486608	-0.344047
sp|Q8N0Y2|ZN444_HUMAN	ZNF444	ZN444_HUMAN Zinc finger protein 444	2	6.33992	7.02103	6.83356	6.0678	6.17136	6.80983	5.93298	6.8097	5.81355	5.27537	6.77617	6.28707	5.70041	5.66772	6.24821	6.24532	6.56558	0.96563	1.06937	1.04082	0.924184	0.939957	1.0372	0.903649	1.03718	0.885459	0.803489	1.03208	0.957581	0.868227	0.863248	0.951662	0.951222	-0.0504573	0.0967608	0.0577154	-0.113748	-0.0893335	0.0526969	-0.146165	0.0526693	-0.175503	-0.31565	0.0455482	-0.0625341	-0.203856
sp|Q9H2M9|RBGPR_HUMAN	RAB3GAP2	RBGPR_HUMAN Rab3 GTPase-activating protein non-catalytic subunit	57	6.25334	6.42832	6.32771	6.32811	6.34404	5.52928	6.27522	5.86934	6.65773	6.40334	6.26871	6.13091	6.36561	6.36573	6.32437	6.12823	6.33437	0.987208	1.01483	0.998949	0.999012	1.00153	0.872901	0.990662	0.926586	1.05105	1.01089	0.989634	0.96788	1.00493	1.00495	0.998421	0.967457	-0.0185742	0.0212406	-0.00151766	-0.00142646	0.00220073	-0.19611	-0.0135351	-0.110003	0.0718292	0.0156235	-0.0150325	-0.0470999	0.00709763
sp|O95429|BAG4_HUMAN	BAG4	BAG4_HUMAN BAG family molecular chaperone regulator 4	9	6.63449	6.29498	5.81362	6.13566	6.46917	6.40744	6.16248	6.62146	5.80989	6.20772	6.29436	6.26277	6.57103	6.05522	6.23033	6.02939	6.21969	1.06669	1.01211	0.934713	0.98649	1.04011	1.03019	0.990802	1.0646	0.934113	0.998076	1.01201	1.00693	1.05649	0.973557	1.00171	0.969404	0.0931435	0.0173597	-0.0974053	-0.0196236	0.0567385	0.042906	-0.013331	0.0903073	-0.0983312	-0.00277861	0.0172176	0.0099588	0.0792774
sp|P30154-2|2AAB_HUMAN	PPP2R1B	2AAB_HUMAN Isoform 2 of Serine/threonine-protein phosphatase 2A 65 kDa regulatory subunit A beta isoform	50	5.9828	6.22502	6.35266	6.32485	6.20214	6.07036	6.16945	5.8422	6.57717	6.3762	6.39219	6.53181	6.24962	6.17914	6.35799	6.1664	6.22133	0.961659	1.00059	1.02111	1.01664	0.996915	0.975733	0.991661	0.939059	1.0572	1.02489	1.02746	1.04991	1.00455	0.993218	1.02197	0.99117	-0.0564028	0.000854859	0.0301372	0.0238077	-0.00445752	-0.0354415	-0.0120817	-0.0907119	0.0802433	0.0354733	0.0390867	0.0702592	0.00654486
sp|P30153|2AAA_HUMAN	PPP2R1A	2AAA_HUMAN Serine/threonine-protein phosphatase 2A 65 kDa regulatory subunit A alpha isoform	64	6.66044	6.13402	6.32938	6.24589	6.4513	6.37819	6.55129	5.87157	5.93938	6.0051	6.41109	6.30861	6.28863	5.95338	6.34991	6.12183	6.34243	1.05014	0.96714	0.997942	0.984778	1.01716	1.00564	1.03293	0.92576	0.936451	0.946813	1.01083	0.994667	0.991517	0.938659	1.00118	0.965218	0.0705812	-0.0482034	-0.00297207	-0.0221291	0.0245536	0.00811081	0.0467428	-0.11129	-0.0947239	-0.078848	0.0155334	-0.00771409	-0.0122905
tr|H0YDG7|H0YDG7_HUMAN	PPP2R1B	H0YDG7_HUMAN Serine/threonine-protein phosphatase 2A 65 kDa regulatory subunit A beta isoform (Fragment)	1	6.10959	7.39981	5.85337	7.57376	5.37338	6.53678	4.9113	8.31168	5.27053	6.13105	5.15471	6.60133	6.26865	6.36248	5.67702	6.46457	6.73413	0.907257	1.09885	0.869209	1.12468	0.797932	0.970694	0.729314	1.23426	0.782659	0.910444	0.76546	0.980279	0.930877	0.944811	0.843022	0.959971	-0.140417	0.135996	-0.202225	0.169518	-0.325662	-0.042912	-0.455387	0.303648	-0.353544	-0.135358	-0.385601	-0.0287354	-0.103337
sp|Q7Z5L9|I2BP2_HUMAN	IRF2BP2	I2BP2_HUMAN Interferon regulatory factor 2-binding protein 2	18	6.26538	6.1719	6.5076	7.16108	6.00649	6.27361	6.40281	5.95152	5.70856	6.37773	6.56752	6.81407	6.10735	5.8624	5.87894	5.94305	6.52649	0.959992	0.945669	0.997106	1.09723	0.920325	0.961253	0.98105	0.911902	0.874675	0.977207	1.00629	1.04406	0.935779	0.898247	0.900781	0.910604	-0.0589053	-0.0805926	-0.00418173	0.13387	-0.119785	-0.0570115	-0.0276021	-0.133049	-0.19318	-0.0332643	0.00904138	0.0622095	-0.0957608
sp|Q9H1B7|I2BPL_HUMAN	IRF2BPL	I2BPL_HUMAN Interferon regulatory factor 2-binding protein-like	18	5.92868	6.10401	6.04987	7.13305	6.13496	6.10862	6.30617	6.10193	6.12221	6.4076	6.47957	6.42672	6.26655	5.96475	6.06638	6.39893	6.3039	0.940478	0.968291	0.959702	1.13153	0.9732	0.969022	1.00036	0.967961	0.971178	1.01645	1.02787	1.01948	0.994075	0.9462	0.962321	1.01507	-0.0885343	-0.0464879	-0.0593411	0.178274	-0.0391913	-0.0453987	0.000518841	-0.0469796	-0.0421927	0.0235389	0.0396529	0.0278374	-0.00857382
sp|Q8IU81|I2BP1_HUMAN	IRF2BP1	I2BP1_HUMAN Interferon regulatory factor 2-binding protein 1	29	5.95553	6.10948	6.34146	6.68356	5.82814	5.32515	6.45121	6.15541	6.19864	6.61222	6.60393	6.73595	6.15716	6.30473	6.27506	6.26238	6.27251	0.949466	0.974009	1.01099	1.06553	0.929156	0.848967	1.02849	0.981332	0.988224	1.05416	1.05284	1.07388	0.981611	1.00514	1.00041	0.998385	-0.0748124	-0.0379927	0.0157727	0.0915745	-0.106007	-0.23622	0.0405275	-0.0271873	-0.0170906	0.0760924	0.0742825	0.102839	-0.0267772
sp|Q9UNS1|TIM_HUMAN	TIMELESS	TIM_HUMAN Protein timeless homolog	24	5.94218	6.09963	6.41584	6.49656	5.67601	5.10485	6.28548	6.13688	6.37108	6.73587	6.66094	6.81413	6.30907	6.38123	6.28844	6.28181	6.23855	0.952493	0.977732	1.02842	1.04136	0.909828	0.818275	1.00752	0.983703	1.02124	1.07972	1.06771	1.09226	1.0113	1.02287	1.008	1.00693	-0.070219	-0.0324896	0.0404268	0.0584647	-0.136334	-0.289343	0.0108116	-0.023706	0.0303266	0.110653	0.0945145	0.127318	0.016216
sp|Q96P48|ARAP1_HUMAN	ARAP1	ARAP1_HUMAN Arf-GAP with Rho-GAP domain, ANK repeat and PH domain-containing protein 1	42	6.10115	6.36836	6.5936	6.39861	6.18838	5.16035	6.28409	6.3413	6.71867	6.25649	6.21049	6.14537	6.49046	6.42231	6.24145	6.07893	6.36543	0.958482	1.00046	1.03585	1.00521	0.972186	0.810684	0.987222	0.996209	1.05549	0.982886	0.975659	0.965429	1.01964	1.00894	0.980523	0.954991	-0.0611768	0.000663918	0.0508084	0.00750056	-0.0406962	-0.302789	-0.0185541	-0.00547934	0.0779177	-0.0249045	-0.0355509	-0.0507581	0.0280628
sp|P08559-4|ODPA_HUMAN	PDHA1	ODPA_HUMAN Isoform 4 of Pyruvate dehydrogenase E1 component subunit alpha, somatic form, mitochondrial	36	6.26081	6.54676	6.45312	5.91694	6.32375	5.9281	5.84333	5.87471	6.88923	6.34325	6.26763	6.0251	6.26718	6.33279	6.48938	6.23793	6.29441	0.994662	1.04009	1.02521	0.940031	1.00466	0.941804	0.928337	0.933322	1.0945	1.00776	0.995746	0.957215	0.995674	1.0061	1.03098	0.991027	-0.00772126	0.0567105	0.0359263	-0.0892193	0.00670975	-0.0865008	-0.10728	-0.0995529	0.130272	0.0111516	-0.00615057	-0.0630854	-0.00625415
sp|Q5JUR7|TEX30_HUMAN	TEX30	TEX30_HUMAN Testis-expressed sequence 30 protein	12	6.19618	6.37196	6.53621	6.13679	6.4058	5.42273	6.27915	5.78116	6.81722	6.30455	6.3566	6.14365	6.50514	6.34449	6.40942	5.98896	6.31029	0.981918	1.00977	1.0358	0.972506	1.01514	0.859348	0.995066	0.916149	1.08033	0.999091	1.00734	0.973593	1.03088	1.00542	1.01571	0.949079	-0.0263261	0.014032	0.0507492	-0.0402209	0.0216736	-0.218686	-0.00713589	-0.126346	0.111478	-0.00131177	0.0105501	-0.0386091	0.0438749
sp|Q99733|NP1L4_HUMAN	NAP1L4	NP1L4_HUMAN Nucleosome assembly protein 1-like 4	25	6.56607	6.14026	5.8942	6.05329	6.44439	6.45624	6.31276	6.09285	6.21636	6.20999	6.58938	6.42772	6.13912	6.0973	6.37644	5.98364	6.16345	1.06532	0.996237	0.956314	0.982126	1.04558	1.0475	1.02422	0.988545	1.00858	1.00755	1.0691	1.04288	0.996052	0.989267	1.03456	0.970826	0.0912908	-0.00543955	-0.0644433	-0.0260198	0.0643045	0.0669549	0.0345316	-0.0166221	0.0123308	0.0108516	0.0964034	0.0605678	-0.00570743
sp|P55209|NP1L1_HUMAN	NAP1L1	NP1L1_HUMAN Nucleosome assembly protein 1-like 1	47	6.15877	6.15664	5.96748	6.10381	6.29097	6.41185	6.11178	6.30035	6.24549	6.28577	6.60827	6.60287	6.28095	6.11117	6.26713	6.09669	6.09668	1.01019	1.00984	0.978809	1.00117	1.03187	1.0517	1.00248	1.03341	1.02441	1.03102	1.08391	1.08303	1.03023	1.00238	1.02796	1	0.0146196	0.0141206	-0.0309008	0.00168741	0.0452598	0.072718	0.00356997	0.0474093	0.0347921	0.0440668	0.11625	0.115071	0.0429601
tr|B7Z9C2|B7Z9C2_HUMAN	NAP1L1	B7Z9C2_HUMAN Nucleosome assembly protein 1-like 1	1	5.8918	4.08768	4.0804	7.09315	5.37249	5.75154	7.62468	5.82715	4.5581	5.43015	5.74135	4.7457	4.83811	20.2498	4.50164	4.20624	5.28826	1.11413	0.772973	0.771596	1.3413	1.01593	1.08761	1.44181	1.1019	0.861929	1.02683	1.08568	0.897403	0.914878	3.8292	0.851252	0.795392	0.155916	-0.37151	-0.374082	0.423634	0.0227985	0.121156	0.527884	0.139998	-0.21436	0.0381996	0.118598	-0.156172	-0.128349
sp|Q8N1S5|S39AB_HUMAN	SLC39A11	S39AB_HUMAN Zinc transporter ZIP11	2	5.8631	4.80135	7.36027	7.07143	6.39732	7.2667	6.82628	5.66472	5.67725	5.85443	7.01754	5.85066	6.15781	6.06805	6.10464	6.01847	6.27404	0.934502	0.765273	1.17313	1.12709	1.01965	1.15822	1.08802	0.902883	0.90488	0.93312	1.1185	0.932519	0.981475	0.967168	0.973	0.959266	-0.0977305	-0.385954	0.230365	0.172608	0.0280735	0.211906	0.121705	-0.14739	-0.144202	-0.0998654	0.161571	-0.100795	-0.0269768
sp|Q9NVC6|MED17_HUMAN	MED17	MED17_HUMAN Mediator of RNA polymerase II transcription subunit 17	16	6.31137	6.10045	6.50233	6.06765	6.43892	5.77498	5.78191	7.72348	6.47731	6.21076	5.66099	6.12725	6.00411	6.53964	6.04567	6.23318	6.24545	1.01055	0.976783	1.04113	0.971531	1.03098	0.92467	0.92578	1.23666	1.03712	0.994446	0.906418	0.981074	0.961357	1.0471	0.968012	0.998035	0.0151477	-0.0338899	0.0581513	-0.0416677	0.0440132	-0.11299	-0.111259	0.306446	0.0525893	-0.00803571	-0.141751	-0.0275658	-0.0568551
tr|J9JID7|J9JID7_HUMAN	LMNB2	J9JID7_HUMAN Lamin B2, isoform CRA_a	27	6.41301	7.32975	6.91492	5.93368	5.78889	6.1006	5.72623	6.48665	7.01024	5.53981	5.31972	5.61369	6.10831	6.17713	6.3883	7.14906	6.64784	0.964676	1.10258	1.04018	0.892573	0.870793	0.917682	0.861367	0.975753	1.05451	0.833325	0.800218	0.844438	0.918841	0.929194	0.960959	1.0754	-0.051884	0.140878	0.0568269	-0.163959	-0.199599	-0.123935	-0.2153	-0.0354121	0.0765782	-0.263049	-0.321535	-0.243936	-0.122112
sp|P02545|LMNA_HUMAN	LMNA	LMNA_HUMAN Prelamin-A/C	85	7.02545	6.60144	6.33256	6.06571	6.44076	6.90411	6.25459	6.34197	6.0631	5.62602	5.71552	5.9517	6.06248	6.14418	6.08038	6.39004	6.50629	1.07979	1.01462	0.973298	0.932284	0.989928	1.06114	0.961314	0.974744	0.931883	0.864705	0.878461	0.914761	0.931788	0.944345	0.934539	0.982133	0.110756	0.0209456	-0.0390463	-0.101159	-0.0146042	0.0856203	-0.0569198	-0.0369041	-0.10178	-0.20972	-0.18695	-0.128533	-0.101927
sp|P02545-2|LMNA_HUMAN	LMNA	LMNA_HUMAN Isoform C of Prelamin-A/C	1	4.62852	7.31379	8.15647	9.32247	7.90673	5.04604	6.40336	5.34758	5.56878	5.96461	5.7862	5.92445	7.3093	6.24239	4.49972	4.57959	7.35531	0.629276	0.994355	1.10892	1.26745	1.07497	0.68604	0.870576	0.727036	0.75711	0.810925	0.786669	0.805465	0.993744	0.848691	0.611765	0.622623	-0.668236	-0.00816743	0.149158	0.341926	0.104295	-0.543635	-0.199958	-0.4599	-0.401425	-0.302359	-0.34617	-0.312105	-0.00905339
sp|P20700|LMNB1_HUMAN	LMNB1	LMNB1_HUMAN Lamin-B1	50	6.43496	7.26758	6.76099	5.66012	5.82261	6.33501	5.65991	6.16355	7.13081	5.5025	5.24425	5.71606	6.28617	6.19337	6.49256	7.32954	6.53091	0.985308	1.1128	1.03523	0.866666	0.891546	0.970004	0.866634	0.94375	1.09186	0.842532	0.802989	0.875231	0.962526	0.948316	0.994128	1.12228	-0.0213534	0.15419	0.0499499	-0.206452	-0.165619	-0.0439377	-0.206505	-0.083523	0.126781	-0.247197	-0.316548	-0.192264	-0.0551033
sp|P19338|NUCL_HUMAN	NCL	NUCL_HUMAN Nucleolin	108	5.99038	6.19231	6.77115	5.59681	7.09314	6.48219	5.27944	6.69139	6.93167	6.1659	5.3196	5.4958	6.05945	7.16572	6.51951	6.24553	6.13766	0.976003	1.0089	1.10321	0.91188	1.15567	1.05613	0.860171	1.09022	1.12937	1.0046	0.866714	0.895422	0.987257	1.1675	1.06221	1.01757	-0.0350418	0.0127884	0.141712	-0.133085	0.208735	0.078792	-0.217304	0.124617	0.175514	0.00662218	-0.206372	-0.15936	-0.0185025
tr|H7BY16|H7BY16_HUMAN	NCL	H7BY16_HUMAN Nucleolin (Fragment)	1	6.0386	5.68114	6.38583	6.73059	5.91227	5.68387	5.63564	8.277	6.67204	7.58074	6.36316	5.84005	5.25159	6.76127	5.99805	5.18815	6.20904	0.97255	0.914979	1.02847	1.084	0.952204	0.915418	0.907651	1.33306	1.07457	1.22092	1.02482	0.940572	0.845797	1.08894	0.966019	0.83558	-0.0401561	-0.12819	0.0405039	0.116363	-0.0706581	-0.127497	-0.139791	0.414738	0.103758	0.287968	0.0353732	-0.0883895	-0.241616
sp|P49006|MRP_HUMAN	MARCKSL1	MRP_HUMAN MARCKS-related protein	26	6.40226	5.91845	6.11079	6.35859	6.22652	6.31745	6.59987	6.16804	5.7198	6.31394	6.61252	6.43219	6.36518	5.82016	6.40997	6.22427	6.19752	1.03304	0.95497	0.986005	1.02599	1.00468	1.01935	1.06492	0.995243	0.922917	1.01878	1.06696	1.03786	1.02705	0.939111	1.03428	1.00432	0.0468897	-0.0664722	-0.0203327	0.0370153	0.00673446	0.0276507	0.090746	-0.00687948	-0.115727	0.0268489	0.0935086	0.0536184	0.0385097
sp|Q7KZF4|SND1_HUMAN	SND1	SND1_HUMAN Staphylococcal nuclease domain-containing protein 1	107	5.90063	6.61366	6.94598	5.79622	6.27668	5.24337	5.72727	6.16431	7.4372	6.20813	5.5149	5.65837	6.6915	6.89545	6.67654	6.24978	6.31412	0.934513	1.04744	1.10007	0.917977	0.99407	0.830419	0.907057	0.976273	1.17787	0.983213	0.873423	0.896145	1.05977	1.09207	1.0574	0.98981	-0.0977133	0.0668666	0.137596	-0.12347	-0.00858059	-0.268088	-0.140735	-0.0346428	0.236177	-0.0244235	-0.195248	-0.158196	0.0837474
sp|P11274|BCR_HUMAN	BCR	BCR_HUMAN Breakpoint cluster region protein	33	5.7326	6.66112	6.78751	6.16114	5.9392	5.52456	6.04393	5.90348	6.97155	6.20558	6.06352	6.22291	6.59327	6.37208	6.56598	6.25155	6.33559	0.904825	1.05138	1.07133	0.972465	0.937434	0.871988	0.953964	0.931796	1.10038	0.979479	0.957057	0.982214	1.04067	1.00576	1.03636	0.986735	-0.14429	0.0722852	0.0994029	-0.0402822	-0.0932109	-0.19762	-0.0679926	-0.101914	0.138	-0.0299135	-0.063324	-0.0258902	0.0575146
sp|Q12979|ABR_HUMAN	ABR	ABR_HUMAN Active breakpoint cluster region-related protein	1	5.77205	5.05218	5.57358	6.65316	5.50571	6.56457	7.18364	7.84637	6.409	5.50948	7.2365	7.96361	5.22381	7.16546	5.49304	4.84783	5.76274	1.00162	0.876697	0.967175	1.15451	0.955398	1.13914	1.24657	1.36157	1.11214	0.956052	1.25574	1.38191	0.90648	1.24341	0.953199	0.841237	0.00232824	-0.18985	-0.0481513	0.207284	-0.0658269	0.187945	0.317959	0.44527	0.153344	-0.0648394	0.328537	0.466667	-0.141653
sp|Q6UWP2|DHR11_HUMAN	DHRS11	DHR11_HUMAN Dehydrogenase/reductase SDR family member 11	9	6.49698	6.07653	6.35606	6.26482	6.46284	6.31695	6.64795	5.89705	5.69514	5.9032	6.62532	6.38142	6.25624	5.89813	6.25902	6.46235	6.2986	1.0315	0.964743	1.00912	0.994637	1.02608	1.00291	1.05547	0.936248	0.904192	0.937225	1.05187	1.01315	0.993275	0.93642	0.993716	1.026	0.0447386	-0.0517829	0.0131021	-0.00775756	0.0371377	0.00419753	0.0778789	-0.0950372	-0.145299	-0.0935334	0.0729595	0.0188469	-0.00973476
sp|P28290|SSFA2_HUMAN	SSFA2	SSFA2_HUMAN Sperm-specific antigen 2	13	5.82392	6.3849	6.87848	6.44211	6.14616	5.36778	6.01704	6.22077	6.58395	6.14895	6.0316	6.26015	6.3784	6.80622	6.36891	6.14068	6.38235	0.912504	1.0004	1.07773	1.00936	0.962993	0.841035	0.942762	0.974683	1.03159	0.96343	0.945043	0.980853	0.999381	1.06641	0.997894	0.962134	-0.132098	0.000575733	0.108002	0.013445	-0.054403	-0.249763	-0.0850343	-0.0369951	0.0448651	-0.0537482	-0.0815475	-0.0278911	-0.000893717
sp|O75528|TADA3_HUMAN	TADA3	TADA3_HUMAN Transcriptional adapter 3	8	6.27439	6.44695	6.25858	6.13261	6.35993	6.29808	5.79112	5.66099	6.51399	6.66572	6.02464	6.21812	6.32846	6.50511	6.1932	6.32809	6.27813	0.999404	1.02689	0.996886	0.976821	1.01303	1.00318	0.922427	0.9017	1.03757	1.06174	0.959623	0.990441	1.00802	1.03615	0.986472	1.00796	-0.000860271	0.0382813	-0.00450011	-0.0338343	0.0186754	0.00457661	-0.116493	-0.149281	0.053206	0.0864252	-0.0594604	-0.013857	0.011519
sp|Q9NXC5|MIO_HUMAN	MIOS	MIO_HUMAN WD repeat-containing protein mio	25	6.46555	6.15652	6.47359	5.91774	6.30974	6.46263	5.64881	6.24207	6.57269	6.14755	5.94308	6.27882	6.24357	6.59016	6.23791	6.30959	6.25335	1.03393	0.984515	1.03522	0.946331	1.00902	1.03347	0.903325	0.998196	1.05107	0.983081	0.950383	1.00407	0.998436	1.05386	0.997531	1.00899	0.0481438	-0.0225142	0.0499367	-0.079583	0.0129513	0.0474921	-0.146682	-0.00260473	0.0718547	-0.0246177	-0.0734185	0.00586419	-0.00225809
sp|P18206|VINC_HUMAN	VCL	VINC_HUMAN Vinculin	226	6.59865	5.89882	5.94948	6.30187	6.32378	6.73986	6.67941	6.11308	5.61587	6.19619	6.66408	6.3637	6.34049	5.84416	6.26954	6.10103	6.18721	1.0665	0.95339	0.961578	1.01853	1.02207	1.08932	1.07955	0.98802	0.907659	1.00145	1.07707	1.02853	1.02477	0.944556	1.01331	0.986072	0.0928831	-0.0688614	-0.0565243	0.0264922	0.0314993	0.123431	0.110433	-0.0173884	-0.139778	0.00209355	0.107118	0.040578	0.0353065
sp|Q8IYI6|EXOC8_HUMAN	EXOC8	EXOC8_HUMAN Exocyst complex component 8	23	6.08033	6.4165	6.26027	6.17248	6.21859	5.66637	6.21106	6.24817	6.3212	6.39287	6.31502	6.41305	6.52931	6.41965	6.13357	6.20155	6.2324	0.975601	1.02954	1.00447	0.990387	0.997785	0.90918	0.996577	1.00253	1.01425	1.02575	1.01326	1.02899	1.04764	1.03005	0.984143	0.995051	-0.035637	0.0419999	0.00643821	-0.0139364	-0.00319917	-0.137362	-0.00494717	0.00364703	0.0204118	0.0366771	0.0190006	0.041224	0.0671439
sp|P42858|HD_HUMAN	HTT	HD_HUMAN Huntingtin	15	5.69478	6.44122	6.66337	6.41589	6.13346	5.48042	5.94969	5.80674	6.74373	6.31674	6.49115	6.40938	6.36209	6.27557	6.30592	6.50987	6.30382	0.903386	1.0218	1.05704	1.01778	0.972976	0.869381	0.943824	0.921147	1.06979	1.00205	1.02972	1.01675	1.00924	0.995519	1.00033	1.03269	-0.146585	0.0311088	0.0800268	0.0254242	-0.039524	-0.201939	-0.0834107	-0.118497	0.0973216	0.002955	0.0422489	0.0239596	0.0132756
sp|P19404|NDUV2_HUMAN	NDUFV2	NDUV2_HUMAN NADH dehydrogenase [ubiquinone] flavoprotein 2, mitochondrial	18	5.88492	5.9395	5.87884	6.5115	4.98336	6.99477	6.34133	6.13275	6.19289	6.61023	6.84827	6.65727	6.20415	6.06014	6.47398	6.28612	6.05369	0.972121	0.981137	0.971117	1.07562	0.823194	1.15546	1.04751	1.01306	1.02299	1.09193	1.13126	1.0997	1.02485	1.00107	1.06943	1.03839	-0.040792	-0.0274733	-0.0422833	0.105175	-0.280696	0.208462	0.0669707	0.0187193	0.032798	0.126886	0.177925	0.137116	0.0354188
sp|Q9UBF2|COPG2_HUMAN	COPG2	COPG2_HUMAN Coatomer subunit gamma-2	41	6.49171	6.09292	6.30625	6.36187	6.46593	6.1818	6.45622	6.05806	6.11562	6.12327	6.45791	6.13806	6.21044	5.93202	6.33293	6.27501	6.31319	1.02828	0.96511	0.998901	1.00771	1.02419	0.979188	1.02266	0.959588	0.968706	0.969917	1.02292	0.97226	0.983725	0.939624	1.00313	0.993953	0.04023	-0.0512348	-0.00158624	0.0110823	0.0344893	-0.0303416	0.0323211	-0.0595127	-0.0458698	-0.0440663	0.0326987	-0.0405859	-0.0236731
sp|Q9Y678|COPG1_HUMAN	COPG1	COPG1_HUMAN Coatomer subunit gamma-1	62	6.48241	6.34921	6.27321	6.00304	6.5912	6.10388	6.25047	5.7629	6.2172	6.17333	6.66192	6.28948	6.23675	6.02606	6.3586	6.22032	6.27697	1.03273	1.01151	0.999401	0.95636	1.05006	0.972425	0.995779	0.918103	0.990478	0.983489	1.06133	1.00199	0.993593	0.960027	1.01301	0.990975	0.0464625	0.0165094	-0.00086388	-0.0643745	0.0704734	-0.0403411	-0.00610306	-0.123273	-0.0138027	-0.0240188	0.0858703	0.002873	-0.00927331
sp|Q92521|PIGB_HUMAN	PIGB	PIGB_HUMAN GPI mannosyltransferase 3	2	6.44088	5.60121	6.40896	6.21938	6.21326	6.25454	6.19097	6.62658	6.51141	5.97628	6.15517	6.95365	6.08314	6.35167	6.24431	5.76858	6.16761	1.04431	0.908166	1.03913	1.00839	1.0074	1.0141	1.00379	1.07442	1.05574	0.968979	0.997983	1.12745	0.986305	1.02984	1.01244	0.935303	0.0625469	-0.138972	0.0553793	0.0120598	0.0106395	0.0201928	0.00545451	0.103554	0.078259	-0.0454632	-0.00291225	0.173059	-0.0198947
sp|P54802|ANAG_HUMAN	NAGLU	ANAG_HUMAN Alpha-N-acetylglucosaminidase	4	6.81445	5.83847	6.10103	6.24162	6.34858	6.56411	6.53224	6.60639	5.99762	6.6179	6.38816	5.927	5.62227	6.28422	5.89965	6.21629	6.24889	1.09051	0.934321	0.976338	0.998836	1.01595	1.05044	1.04534	1.05721	0.959789	1.05905	1.02229	0.948488	0.899723	1.00565	0.944111	0.994783	0.124997	-0.0980102	-0.0345477	-0.00168	0.0228334	0.0709989	0.0639773	0.0802616	-0.0592104	0.082773	0.0317999	-0.0762985	-0.152448
sp|O00330|ODPX_HUMAN	PDHX	ODPX_HUMAN Pyruvate dehydrogenase protein X component, mitochondrial	25	6.55926	6.32117	6.36147	6.22272	6.34121	6.4006	6.1982	6.68158	6.07995	6.24549	6.04396	5.7483	5.89971	6.37315	6.22386	6.29937	6.36616	1.03033	0.992934	0.999264	0.977469	0.996082	1.00541	0.973618	1.04955	0.955043	0.981046	0.949389	0.902947	0.92673	1.0011	0.977648	0.989509	0.0431108	-0.0102307	-0.0010621	-0.032877	-0.00566413	0.00778487	-0.038573	0.069767	-0.0663628	-0.0276075	-0.0749282	-0.147287	-0.109778
sp|P13995|MTDC_HUMAN	MTHFD2	MTDC_HUMAN Bifunctional methylenetetrahydrofolate dehydrogenase/cyclohydrolase, mitochondrial	33	6.6211	5.9883	5.95836	6.00989	6.43766	6.67786	6.25099	6.07958	6.35095	6.27309	6.57779	6.43803	6.1955	5.97891	6.23528	5.92671	6.14441	1.07758	0.974593	0.96972	0.978107	1.04773	1.08682	1.01735	0.989449	1.03361	1.02094	1.07053	1.04779	1.00831	0.973065	1.01479	0.964569	0.107796	-0.0371286	-0.0443598	-0.0319365	0.0672613	0.120111	0.0248096	-0.0153034	0.0476973	0.0299012	0.0983279	0.0673442	0.0119456
sp|Q9H903|MTD2L_HUMAN	MTHFD2L	MTD2L_HUMAN Probable bifunctional methylenetetrahydrofolate dehydrogenase/cyclohydrolase 2	1	5.19301	9.20647	6.0888	7.12697	5.40353	5.90384	5.27683	5.22117	5.43479	5.94768	6.6274	7.02329	6.24463	6.03185	6.84058	6.42914	6.90381	0.752195	1.33353	0.881947	1.03232	0.782688	0.855156	0.764336	0.756273	0.787216	0.861507	0.959962	1.01731	0.904519	0.873698	0.990841	0.931245	-0.410822	0.415255	-0.181235	0.0458956	-0.353491	-0.22574	-0.387722	-0.40302	-0.345169	-0.215066	-0.0589503	0.0247537	-0.144777
sp|P49585|PCY1A_HUMAN	PCYT1A	PCY1A_HUMAN Choline-phosphate cytidylyltransferase A	16	6.48426	6.2003	5.84047	6.21907	6.33394	5.88605	6.43662	6.14958	6.28359	6.60344	6.6909	6.31853	6.22598	5.97688	6.27752	6.07287	6.18603	1.04821	1.00231	0.944139	1.00534	1.02391	0.951508	1.04051	0.994108	1.01577	1.06748	1.08162	1.02142	1.00646	0.966191	1.01479	0.981708	0.0679293	0.00332536	-0.0829282	0.00768619	0.0340905	-0.0717129	0.0572906	-0.00852478	0.0225764	0.0942051	0.113188	0.0305763	0.00928828
sp|Q96F24|NRBF2_HUMAN	NRBF2	NRBF2_HUMAN Nuclear receptor-binding factor 2	13	6.2294	6.03849	5.82221	6.13215	6.02801	6.47175	6.24517	6.2506	6.14825	6.43205	6.67432	6.6711	6.12421	6.39163	6.22431	6.11635	6.05556	1.02871	0.997181	0.961465	1.01265	0.99545	1.06873	1.03131	1.03221	1.01531	1.06217	1.10218	1.10165	1.01134	1.0555	1.02787	1.01004	0.0408322	-0.00407315	-0.0566941	0.018132	-0.00657917	0.0958949	0.0444799	0.0457337	0.0219149	0.0870176	0.14036	0.139664	0.0162628
sp|Q9H7E9-2|CH033_HUMAN	C8orf33	CH033_HUMAN Isoform 2 of UPF0488 protein C8orf33	9	5.78637	6.46939	7.85414	5.61584	6.81881	6.05808	5.05443	6.27067	7.21439	6.12024	4.91407	5.15134	5.93386	7.65751	6.59883	6.48205	6.43144	0.899701	1.0059	1.22121	0.873186	1.06023	0.941948	0.785895	0.975003	1.12174	0.951613	0.764071	0.800963	0.922634	1.19064	1.02603	1.00787	-0.152482	0.00848901	0.288313	-0.195639	0.0843793	-0.08628	-0.347592	-0.0365211	0.165737	-0.0715524	-0.388222	-0.320193	-0.11617
sp|O43765|SGTA_HUMAN	SGTA	SGTA_HUMAN Small glutamine-rich tetratricopeptide repeat-containing protein alpha	32	6.40642	6.28633	6.16258	6.37934	5.8702	6.08428	6.72307	6.0821	6.25918	6.41079	6.5342	6.16503	6.35337	6.06211	6.19067	6.03033	6.30867	1.01549	0.996459	0.976843	1.0112	0.930498	0.964432	1.06569	0.964086	0.992156	1.01619	1.03575	0.977232	1.00709	0.960918	0.981296	0.95588	0.0221831	-0.00511731	-0.0338008	0.0160719	-0.103926	-0.0522488	0.0917849	-0.0527658	-0.0113616	0.0231668	0.0506753	-0.0332274	0.0101867
sp|O95336|6PGL_HUMAN	PGLS	6PGL_HUMAN 6-phosphogluconolactonase	12	4.75148	5.55083	6.40675	6.97587	3.88287	5.98314	6.36946	5.992	5.26946	7.04182	5.55789	7.25684	5.70498	7.15064	7.62429	8.48167	5.92123	0.802448	0.937445	1.082	1.17811	0.655754	1.01046	1.0757	1.01195	0.889926	1.18925	0.938637	1.22556	0.963478	1.20763	1.28762	1.43242	-0.317521	-0.093194	0.113695	0.236476	-0.608774	0.0150053	0.105274	0.0171401	-0.168242	0.250051	-0.0913602	0.293444	-0.0536757
sp|P55060|XPO2_HUMAN	CSE1L	XPO2_HUMAN Exportin-2	121	6.48609	6.25945	6.04425	6.05944	6.55863	5.95923	6.44373	5.95118	6.26372	6.35279	6.53389	6.31348	6.37657	6.06212	6.24675	6.08867	6.21231	1.04407	1.00759	0.972948	0.975393	1.05575	0.959262	1.03725	0.957966	1.00828	1.02261	1.05177	1.01629	1.02644	0.975824	1.00554	0.980098	0.0622198	0.0109067	-0.0395659	-0.0359448	0.0782652	-0.0600033	0.0527668	-0.0619535	0.0118905	0.0322611	0.0728129	0.0233062	0.0376514
sp|P38398|BRCA1_HUMAN	BRCA1	BRCA1_HUMAN Breast cancer type 1 susceptibility protein	12	6.41827	6.17759	6.81987	6.57932	6.12169	5.90694	5.88684	6.82294	6.51449	6.32619	6.14395	6.13131	5.90086	6.24607	5.61401	6.38966	6.49876	0.987614	0.950579	1.04941	1.0124	0.941978	0.908933	0.90584	1.04988	1.00242	0.973445	0.945403	0.943458	0.907997	0.961117	0.863858	0.983212	-0.0179805	-0.0731209	0.0695792	0.0177735	-0.086235	-0.137754	-0.142672	0.0702285	0.00348721	-0.0388281	-0.0809985	-0.0839697	-0.13924
sp|Q9BUH6|CI142_HUMAN	C9orf142	CI142_HUMAN Uncharacterized protein C9orf142	14	6.49793	6.06641	5.95267	6.4917	5.86127	6.39064	6.56234	6.47256	5.72185	6.39881	7.1949	6.67845	6.23373	5.32362	6.21901	5.93411	6.25218	1.03931	0.970288	0.952095	1.03831	0.937477	1.02215	1.04961	1.03525	0.915177	1.02345	1.15078	1.06818	0.997049	0.851483	0.994695	0.949127	0.0556215	-0.0435157	-0.0708218	0.0542376	-0.0931454	0.0316017	0.0698516	0.0499777	-0.127877	0.0334449	0.202616	0.0951546	-0.00426307
sp|Q96JP0|FEM1C_HUMAN	FEM1C	FEM1C_HUMAN Protein fem-1 homolog C	3	6.25016	6.21267	6.56166	6.24109	5.74412	5.37716	7.37541	6.53699	5.37582	5.98501	7.43401	6.25932	6.19872	6.64613	5.78854	6.01319	6.31639	0.989514	0.983578	1.03883	0.988078	0.909398	0.851302	1.16766	1.03492	0.85109	0.947536	1.17694	0.990964	0.98137	1.0522	0.916431	0.951997	-0.0152083	-0.023888	0.0549594	-0.0173034	-0.137016	-0.232257	0.223622	0.0495251	-0.232617	-0.0777477	0.235039	-0.0130955	-0.0271311
sp|Q9BSK4|FEM1A_HUMAN	FEM1A	FEM1A_HUMAN Protein fem-1 homolog A	3	6.11123	6.43643	6.5841	6.45907	6.67166	5.63272	6.03359	6.16079	6.41597	6.5912	6.00055	5.72214	6.46009	6.2883	6.24146	6.1907	6.39771	0.955222	1.00605	1.02913	1.00959	1.04282	0.880428	0.943086	0.962968	1.00285	1.03024	0.937922	0.894405	1.00975	0.982899	0.975578	0.967643	-0.0660923	0.00870568	0.0414312	0.0137714	0.0604907	-0.183723	-0.0845384	-0.0544397	0.00411236	0.0429861	-0.0924603	-0.161	0.0139992
sp|O95235|KI20A_HUMAN	KIF20A	KI20A_HUMAN Kinesin-like protein KIF20A	11	6.08197	6.67889	6.76998	6.25274	6.00618	5.46103	5.98933	6.16845	7.03353	6.2061	5.7768	5.96259	6.20148	6.46285	6.41078	6.5373	6.4459	0.943542	1.03615	1.05028	0.970034	0.931784	0.847211	0.92917	0.956958	1.09116	0.962799	0.896198	0.925021	0.962082	1.00263	0.994552	1.01418	-0.083842	0.0512277	0.0707709	-0.0438922	-0.101933	-0.239208	-0.105986	-0.0634727	0.125868	-0.0546937	-0.15811	-0.112442	-0.0557681
sp|Q9P265|DIP2B_HUMAN	DIP2B	DIP2B_HUMAN Disco-interacting protein 2 homolog B	66	6.56121	6.01593	6.00868	6.26359	6.3608	6.42728	6.38388	6.1203	6.06679	6.21791	6.57209	6.478	6.14778	6.15384	6.04868	6.17323	6.21235	1.05616	0.968382	0.967215	1.00825	1.0239	1.0346	1.02761	0.985182	0.976569	1.00089	1.05791	1.04276	0.989606	0.990581	0.973654	0.993702	0.0788222	-0.0463519	-0.0480916	0.0118501	0.0340685	0.0490686	0.0392938	-0.0215373	-0.0342063	0.00129004	0.0812125	0.0604088	-0.0150742
sp|Q14689|DIP2A_HUMAN	DIP2A	DIP2A_HUMAN Disco-interacting protein 2 homolog A	13	5.76732	6.35776	6.58889	6.60038	6.23798	5.56441	6.32068	6.30349	6.02463	6.53541	6.58796	6.57871	5.9447	6.21907	6.31678	6.05181	6.32859	0.911312	1.00461	1.04113	1.04295	0.985683	0.87925	0.998751	0.996034	0.951971	1.03268	1.04098	1.03952	0.939341	0.982695	0.998134	0.956266	-0.133982	0.00663502	0.0581519	0.0606656	-0.0208046	-0.185655	-0.00180376	-0.00573272	-0.0710109	0.0463942	0.0579483	0.0559212	-0.0902795
sp|Q8TDX7|NEK7_HUMAN	NEK7	NEK7_HUMAN Serine/threonine-protein kinase Nek7	8	6.36427	6.23739	6.51712	6.31159	6.40614	6.15456	6.42809	5.49258	5.87188	6.00297	6.85245	6.1509	6.26077	6.13823	6.35203	6.45903	6.35759	1.00105	0.981093	1.02509	0.992764	1.00764	0.968065	1.01109	0.86394	0.923601	0.944221	1.07784	0.967489	0.984771	0.965496	0.999125	1.01596	0.00151449	-0.0275381	0.035754	-0.0104771	0.0109748	-0.0468248	0.0159096	-0.210997	-0.114658	-0.0828041	0.108139	-0.047683	-0.0221404
sp|Q9HC98-2|NEK6_HUMAN	NEK6	NEK6_HUMAN Isoform 2 of Serine/threonine-protein kinase Nek6	5	6.2794	6.72976	6.0241	6.37706	6.11312	5.61465	6.10883	5.77716	6.38312	6.77309	6.02901	6.73777	6.59393	5.74753	6.24112	6.47036	6.35258	0.98848	1.05937	0.948292	1.00385	0.962305	0.883838	0.96163	0.909419	1.00481	1.0662	0.949065	1.06064	1.03799	0.904755	0.982454	1.01854	-0.0167159	0.0832124	-0.0765969	0.00554882	-0.0554338	-0.178147	-0.0564465	-0.136982	0.00691913	0.0924715	-0.0754215	0.0849285	0.0537959
sp|P13796|PLSL_HUMAN	LCP1	PLSL_HUMAN Plastin-2	103	6.54059	5.81869	5.80593	6.00773	6.2563	6.91441	6.44026	6.31285	5.93893	6.27203	6.68996	6.50202	6.29442	6.04411	6.19913	5.96264	6.04324	1.0823	0.962844	0.960732	0.994125	1.03526	1.14416	1.0657	1.04461	0.98274	1.03786	1.10702	1.07592	1.04156	1.00014	1.0258	0.986664	0.1141	-0.0546267	-0.0577939	-0.00850107	0.0499886	0.194285	0.0917979	0.0629704	-0.025118	0.0536114	0.146677	0.105567	0.0587524
sp|Q14651|PLSI_HUMAN	PLS1	PLSI_HUMAN Plastin-1	28	6.3803	6.19297	6.33351	6.43031	6.50779	6.02766	6.42979	6.20959	6.1926	6.26875	6.48648	6.31195	6.22454	5.79708	6.2227	5.98397	6.33427	1.00727	0.977692	0.99988	1.01516	1.02739	0.951595	1.01508	0.980316	0.977634	0.989656	1.02403	0.996476	0.982676	0.915193	0.982386	0.944697	0.0104453	-0.0325475	-0.000173678	0.0217094	0.0389888	-0.0715809	0.0215927	-0.0286809	-0.0326337	-0.0150011	0.0342569	-0.00509316	-0.0252117
sp|P13797|PLST_HUMAN	PLS3	PLST_HUMAN Plastin-3	24	6.63085	6.05116	6.04564	6.27793	6.44611	6.46444	6.55845	6.14657	5.59422	6.16288	6.5366	6.62779	6.25721	6.1309	6.02859	6.04068	6.2514	1.0607	0.96797	0.967087	1.00424	1.03115	1.03408	1.04912	0.983232	0.894875	0.985841	1.04562	1.06021	1.00093	0.980725	0.964359	0.966293	0.0850157	-0.0469664	-0.0482831	0.00611078	0.0442506	0.0483472	0.0691767	-0.0243966	-0.160241	-0.0205735	0.0643623	0.0843497	0.00134136
sp|Q9P2G1|AKIB1_HUMAN	ANKIB1	AKIB1_HUMAN Ankyrin repeat and IBR domain-containing protein 1	4	5.99204	6.59813	6.20472	5.54884	5.96628	6.34819	6.4934	6.42569	6.10245	6.2573	5.66461	6.64067	6.73784	6.17885	6.27363	6.56737	6.08593	0.984572	1.08416	1.01952	0.911749	0.980339	1.04309	1.06695	1.05583	1.00271	1.02816	0.930771	1.09115	1.10712	1.01527	1.03084	1.07911	-0.0224311	0.116579	0.0278878	-0.133292	-0.0286466	0.060867	0.0934958	0.078373	0.00391024	0.0400619	-0.103502	0.12585	0.146808
sp|Q9HC38-2|GLOD4_HUMAN	GLOD4	GLOD4_HUMAN Isoform 2 of Glyoxalase domain-containing protein 4	41	6.43667	6.10882	6.05475	6.14226	6.65413	5.83287	6.39035	6.03317	6.37484	6.35698	6.52587	6.20424	6.47298	6.01902	6.27005	6.12302	6.18562	1.04059	0.987583	0.978842	0.992989	1.07574	0.942972	1.0331	0.975353	1.03059	1.0277	1.05501	1.00301	1.04646	0.973066	1.01365	0.989879	0.0573951	-0.0180256	-0.030852	-0.0101498	0.105331	-0.0847135	0.0469756	-0.0360031	0.0434698	0.0394222	0.0772509	0.00433512	0.0655107
sp|Q01813|K6PP_HUMAN	PFKP	K6PP_HUMAN 6-phosphofructokinase type C	67	6.58178	5.84836	6.73671	6.86426	6.20822	6.25948	6.69594	5.61275	5.25471	5.90347	6.59589	6.41199	6.44044	6.00035	6.37386	6.2118	6.50778	1.01137	0.898672	1.03518	1.05478	0.953969	0.961846	1.02891	0.862468	0.807451	0.907141	1.01354	0.985281	0.989653	0.922028	0.979422	0.954519	0.0163129	-0.154133	0.0498793	0.0769393	-0.0679852	-0.0561221	0.0411217	-0.213457	-0.308554	-0.140602	0.0194024	-0.0213928	-0.0150057
sp|P08237-3|K6PF_HUMAN	PFKM	K6PF_HUMAN Isoform 3 of 6-phosphofructokinase, muscle type	39	6.59494	5.94228	5.99805	6.38461	6.10158	6.6221	6.71217	6.01421	5.57516	6.25725	6.62176	6.59552	6.27899	6.09649	6.11853	6.08636	6.22997	1.05858	0.953822	0.962773	1.02482	0.979392	1.06294	1.0774	0.965367	0.894894	1.00438	1.06289	1.05868	1.00787	0.978575	0.982112	0.976949	0.0821343	-0.0682086	-0.0547317	0.0353733	-0.0300423	0.0880636	0.107554	-0.05085	-0.160212	0.00630353	0.0879895	0.0822612	0.0113073
sp|P17858-2|K6PL_HUMAN	PFKL	K6PL_HUMAN Isoform 2 of 6-phosphofructokinase, liver type	39	6.67089	5.91876	6.03902	6.57175	6.07598	6.42156	6.5159	6.33014	5.6508	6.2697	6.68057	6.41738	6.12535	6.13048	6.02138	6.16034	6.30011	1.05885	0.93947	0.958559	1.04312	0.964425	1.01928	1.03425	1.00477	0.896937	0.995174	1.06039	1.01861	0.972262	0.973076	0.955759	0.977815	0.0825034	-0.0900809	-0.0610614	0.0609017	-0.0522588	0.0275479	0.0485886	0.00686153	-0.156921	-0.00697946	0.0845953	0.0266085	-0.0405836
sp|Q99575|POP1_HUMAN	POP1	POP1_HUMAN Ribonucleases P/MRP protein subunit POP1	52	6.47182	5.98535	6.39674	6.36917	6.41177	6.50449	6.2799	5.87419	6.15507	6.12763	6.28798	6.1792	6.17728	6.40643	6.14078	6.2322	6.30577	1.02633	0.949186	1.01443	1.01005	1.01681	1.03151	0.995897	0.931558	0.976101	0.97175	0.997179	0.979928	0.979623	1.01596	0.973835	0.988333	0.0374989	-0.0752369	0.0206643	0.0144328	0.0240501	0.0447634	-0.00593096	-0.102283	-0.0348973	-0.0413434	-0.00407592	-0.0292525	-0.0297008
sp|Q53H12|AGK_HUMAN	AGK	AGK_HUMAN Acylglycerol kinase, mitochondrial	30	6.13977	5.95382	6.44383	6.60926	6.35329	6.0773	6.55562	6.26309	5.78018	6.14062	6.70812	6.77246	6.2368	5.61571	6.16124	6.18888	6.28667	0.976633	0.947055	1.025	1.05131	1.0106	0.966696	1.04278	0.996249	0.919434	0.976768	1.06704	1.07727	0.992067	0.893273	0.980048	0.984445	-0.0341114	-0.0784804	0.0356224	0.0721927	0.0152078	-0.0488655	0.0604362	-0.00542142	-0.121182	-0.0339117	0.0936125	0.107384	-0.01149
sp|Q05086|UBE3A_HUMAN	UBE3A	UBE3A_HUMAN Ubiquitin-protein ligase E3A	43	6.42237	6.18104	6.29672	6.13249	6.43354	6.37335	6.40727	5.99552	5.87864	6.08767	6.50826	6.67943	6.18483	6.02757	6.15709	6.23423	6.25816	1.02624	0.987678	1.00616	0.97992	1.02803	1.01841	1.02383	0.958033	0.939357	0.972758	1.03996	1.06732	0.988283	0.963154	0.983851	0.996177	0.0373684	-0.0178878	0.00886312	-0.0292644	0.0398754	0.0263145	0.0339724	-0.0618525	-0.090255	-0.0398472	0.0565345	0.0939876	-0.0170035
sp|Q8NCG7|DGLB_HUMAN	DAGLB	DGLB_HUMAN Sn1-specific diacylglycerol lipase beta	3	6.15963	6.02943	6.47878	6.36826	5.85955	5.96458	6.50711	6.09792	6.00707	6.23517	6.6224	6.59318	6.08521	6.31542	6.06825	6.60803	6.25902	0.98412	0.963318	1.03511	1.01745	0.936176	0.952957	1.03964	0.97426	0.959745	0.996189	1.05806	1.05339	0.97223	1.00901	0.96952	1.05576	-0.0230942	-0.0539163	0.0497842	0.0249613	-0.0951481	-0.0695174	0.056079	-0.0376207	-0.0592765	-0.00550904	0.0814162	0.0750365	-0.0406309
sp|Q9UGR2|Z3H7B_HUMAN	ZC3H7B	Z3H7B_HUMAN Zinc finger CCCH domain-containing protein 7B	21	5.56145	6.4791	6.87848	6.09267	6.10676	5.92173	5.31752	6.07168	7.39011	6.17075	5.66703	5.96451	6.46369	6.71299	6.69645	6.50507	6.25292	0.889416	1.03617	1.10004	0.974371	0.976625	0.947034	0.850405	0.971014	1.18186	0.986858	0.906301	0.953875	1.03371	1.07358	1.07093	1.04032	-0.16907	0.0512622	0.137559	-0.0374566	-0.0341241	-0.0785125	-0.233778	-0.0424355	0.241065	-0.0190854	-0.141938	-0.0681276	0.0478268
sp|Q8IWR0|Z3H7A_HUMAN	ZC3H7A	Z3H7A_HUMAN Zinc finger CCCH domain-containing protein 7A	18	5.63437	6.23755	6.48304	5.92122	5.91234	5.39062	5.85024	6.03098	7.00593	6.32199	6.57227	6.77572	6.57813	6.45105	6.4102	6.42435	6.06904	0.928378	1.02776	1.06821	0.975643	0.97418	0.888216	0.963947	0.993728	1.15437	1.04168	1.08292	1.11644	1.08388	1.06294	1.05621	1.05854	-0.107215	0.03951	0.095201	-0.0355751	-0.0377403	-0.171018	-0.0529737	-0.00907707	0.207107	0.0589092	0.114922	0.158905	0.116208
sp|O60749|SNX2_HUMAN	SNX2	SNX2_HUMAN Sorting nexin-2	34	6.40643	6.2649	6.11943	6.1302	6.55628	5.97859	6.13142	5.87506	6.62274	6.47541	6.53904	6.34001	6.27883	5.9339	6.19626	6.15148	6.23024	1.02828	1.00556	0.982214	0.983943	1.05233	0.959608	0.984139	0.942991	1.063	1.03935	1.04956	1.01762	1.0078	0.952435	0.994546	0.987358	0.0402329	0.00800374	-0.0258905	-0.0233536	0.0735897	-0.0594825	-0.0230665	-0.0846842	0.0881405	0.0556838	0.0697911	0.0251974	0.011208
sp|Q13596|SNX1_HUMAN	SNX1	SNX1_HUMAN Sorting nexin-1	42	6.56437	6.49995	6.19724	6.31958	6.56707	5.73499	6.29262	6.07976	6.40903	6.36468	6.30715	6.20791	6.28681	6.01943	6.13834	6.01104	6.39528	1.02644	1.01637	0.969033	0.988162	1.02686	0.896753	0.983947	0.950663	1.00215	0.995214	0.986219	0.970701	0.983038	0.941229	0.959823	0.939917	0.0376479	0.02342	-0.0453828	-0.01718	0.0382412	-0.157218	-0.0233478	-0.0729943	0.00309737	-0.00692067	-0.0200204	-0.042901	-0.0246805
sp|Q9UBQ7|GRHPR_HUMAN	GRHPR	GRHPR_HUMAN Glyoxylate reductase/hydroxypyruvate reductase	28	6.57152	5.90242	6.01436	6.35124	6.29723	6.2791	6.45689	5.87572	6.19234	6.31844	6.83215	6.28927	6.23712	5.86151	6.3502	6.1705	6.20988	1.05824	0.950488	0.968514	1.02276	1.01407	1.01115	1.03978	0.946188	0.997175	1.01748	1.10021	1.01278	1.00439	0.9439	1.0226	0.993658	0.0816606	-0.07326	-0.0461553	0.0324717	0.0201508	0.0159912	0.0562729	-0.0798009	-0.00408186	0.0250019	0.137773	0.018326	0.00631346
sp|P43304|GPDM_HUMAN	GPD2	GPDM_HUMAN Glycerol-3-phosphate dehydrogenase, mitochondrial	59	6.35906	6.03344	6.03452	6.27067	6.03583	6.69157	6.39944	6.09558	5.75333	6.4367	6.77547	6.84893	6.03293	5.94674	6.1352	6.15058	6.17442	1.0299	0.977167	0.977342	1.01559	0.977554	1.08376	1.03644	0.987231	0.931801	1.04248	1.09734	1.10924	0.977084	0.963125	0.993648	0.996139	0.0425093	-0.0333234	-0.0330652	0.0223154	-0.032752	0.116041	0.0516415	-0.0185407	-0.101907	0.060017	0.134017	0.149574	-0.0334454
sp|Q13586|STIM1_HUMAN	STIM1	STIM1_HUMAN Stromal interaction molecule 1	31	6.32525	5.94	6.20224	6.28307	6.31876	5.95549	6.44332	8.00289	5.77125	6.15972	6.24148	6.25644	6.23637	5.9845	5.94664	5.93259	6.18764	1.02224	0.959978	1.00236	1.01542	1.02119	0.962482	1.04132	1.29337	0.932706	0.995488	1.0087	1.01112	1.00788	0.96717	0.961051	0.958781	0.0317332	-0.0589263	0.00340009	0.0220804	0.0302522	-0.055169	0.058415	0.371132	-0.100505	-0.00652449	0.0124989	0.0159527	0.0113173
sp|Q9P246|STIM2_HUMAN	STIM2	STIM2_HUMAN Stromal interaction molecule 2	10	5.85109	6.12626	6.46648	6.59058	5.83403	5.83051	6.27288	6.51377	6.63075	6.40604	6.56383	6.75442	6.05331	6.03906	5.8963	6.17072	6.2586	0.934888	0.978854	1.03321	1.05304	0.932162	0.931599	1.00228	1.04077	1.05946	1.02356	1.04877	1.07922	0.967198	0.964921	0.942111	0.985958	-0.0971351	-0.030834	0.0471401	0.0745649	-0.101348	-0.102218	0.00328741	0.0576522	0.0833315	0.0335923	0.0686973	0.109991	-0.0481163
sp|Q9NXH9|TRM1_HUMAN	TRMT1	TRM1_HUMAN tRNA (guanine(26)-N(2))-dimethyltransferase	37	6.60462	5.90456	5.98486	6.43368	6.0371	6.583	6.65305	6.26758	5.60997	6.27982	6.68559	6.45183	6.16701	6.13115	6.087	6.11919	6.23193	1.0598	0.947469	0.960354	1.03237	0.968737	1.05633	1.06757	1.00572	0.900198	1.00768	1.0728	1.03529	0.989583	0.983828	0.976744	0.981909	0.0837965	-0.0778495	-0.0583615	0.0459652	-0.0458233	0.0790662	0.0943368	0.00822948	-0.151686	0.0110442	0.101376	0.0500294	-0.0151078
sp|P06753|TPM3_HUMAN	TPM3	TPM3_HUMAN Tropomyosin alpha-3 chain	80	6.54445	6.28568	5.98709	6.76023	6.17679	6.8998	6.58861	6.29239	5.44815	6.15774	6.39444	6.41251	6.21325	5.62217	6.13232	6.08438	6.39436	1.02347	0.983003	0.936308	1.05722	0.965974	1.07904	1.03038	0.984053	0.852024	0.962995	1.00001	1.00284	0.971676	0.879239	0.95902	0.951523	0.0334714	-0.0247317	-0.0949456	0.0802718	-0.0499433	0.109754	0.0431736	-0.0231924	-0.231034	-0.0543996	1.74854e-05	0.00408864	-0.0414524
sp|P09493-9|TPM1_HUMAN	TPM1	TPM1_HUMAN Isoform 9 of Tropomyosin alpha-1 chain	8	6.39296	6.22634	5.38791	6.25928	6.22141	6.96986	6.47271	6.30966	5.77212	6.42739	6.33976	6.41084	6.46828	6.30672	5.87665	6.15811	6.06662	1.05379	1.02633	0.888123	1.03176	1.02551	1.14889	1.06694	1.04006	0.951455	1.05947	1.04502	1.05674	1.06621	1.03958	0.968686	1.01508	0.0755905	0.0374908	-0.171168	0.0451032	0.036348	0.200236	0.0934763	0.0566687	-0.0717922	0.0833395	0.0635347	0.0796199	0.0924886
sp|P67936-2|TPM4_HUMAN	TPM4	TPM4_HUMAN Isoform 2 of Tropomyosin alpha-4 chain	17	6.41914	5.92915	5.74389	6.23995	6.18604	7.03822	6.66132	6.32008	5.90821	6.51505	6.60261	6.4735	5.9916	5.77344	6.152	6.0458	6.08303	1.05525	0.974703	0.944248	1.0258	1.01693	1.15702	1.09507	1.03897	0.971261	1.07102	1.08541	1.06419	0.984969	0.949106	1.01134	0.993879	0.0775893	-0.0369654	-0.0827626	0.0367438	0.0242255	0.21042	0.131017	0.0551521	-0.0420696	0.0989855	0.118246	0.0897552	-0.0218494
sp|P67936|TPM4_HUMAN	TPM4	TPM4_HUMAN Tropomyosin alpha-4 chain	4	5.83707	6.00092	6.32034	7.07694	6.08903	6.91655	5.80221	6.81371	5.68744	6.34983	6.08275	6.40636	5.93445	6.61163	5.85019	6.22058	6.30882	0.925224	0.951196	1.00183	1.12175	0.965162	1.09633	0.919699	1.08003	0.901507	1.0065	0.964166	1.01546	0.94066	1.048	0.927304	0.986014	-0.112125	-0.0721859	0.00263255	0.165756	-0.0511572	0.132683	-0.120767	0.111071	-0.14959	0.00934835	-0.0526459	0.0221353	-0.0882553
sp|P06753-2|TPM3_HUMAN	TPM3	TPM3_HUMAN Isoform 2 of Tropomyosin alpha-3 chain	54	6.43864	5.86212	5.62273	6.36472	6.27728	6.80434	6.82268	6.47399	5.67596	6.2297	6.57889	6.4233	6.41341	5.85354	6.25721	5.90147	6.07205	1.06037	0.965426	0.926002	1.0482	1.0338	1.1206	1.12362	1.06619	0.934768	1.02596	1.08347	1.05785	1.05622	0.964013	1.03049	0.971907	0.0845717	-0.0507618	-0.110913	0.0679128	0.0479553	0.164271	0.168154	0.0924709	-0.0973198	0.0369784	0.11566	0.0811304	0.0789074
sp|P06753-3|TPM3_HUMAN	TPM3	TPM3_HUMAN Isoform 3 of Tropomyosin alpha-3 chain	2	6.97701	5.80058	6.2665	6.81581	5.84641	6.46686	6.37083	6.69008	5.14879	5.83157	7.09053	6.62782	6.07356	5.64999	6.05265	6.291	6.46497	1.0792	0.897232	0.9693	1.05427	0.904321	1.00029	0.985438	1.03482	0.796413	0.902025	1.09676	1.02519	0.939456	0.873938	0.936222	0.97309	0.109964	-0.156448	-0.0449849	0.0762403	-0.145094	0.000420587	-0.0211635	0.0493787	-0.328411	-0.14876	0.133249	0.0358896	-0.0901024
tr|H7BYY1|H7BYY1_HUMAN	TPM1	H7BYY1_HUMAN Tropomyosin 1 (Alpha), isoform CRA_m	13	6.64102	6.08032	5.95059	6.68613	6.16619	6.41485	6.58258	6.46318	5.47378	6.14734	6.52014	6.53556	6.07304	6.07109	6.09825	6.09593	6.33952	1.04756	0.959114	0.938651	1.05468	0.97266	1.01188	1.03834	1.01951	0.863438	0.969686	1.02849	1.03092	0.957966	0.957658	0.961943	0.961577	0.0670324	-0.0602252	-0.0913398	0.0767989	-0.0399931	0.0170431	0.0542807	0.0278717	-0.211835	-0.0444102	0.0405305	0.0439384	-0.0619536
sp|Q6P1J9|CDC73_HUMAN	CDC73	CDC73_HUMAN Parafibromin	37	5.94141	6.25192	6.23394	6.28236	6.08666	5.52498	6.32026	6.06452	6.65307	6.59307	6.43212	6.52247	6.22702	6.21723	6.3317	6.31725	6.17741	0.961797	1.01206	1.00915	1.01699	0.98531	0.894385	1.02312	0.981726	1.077	1.06729	1.04123	1.05586	1.00803	1.00645	1.02498	1.02264	-0.0561962	0.0172978	0.0131428	0.0243051	-0.0213507	-0.161032	0.0329824	-0.026608	0.107019	0.0939489	0.0582928	0.0784169	0.0115404
sp|O75061-2|AUXI_HUMAN	DNAJC6	AUXI_HUMAN Isoform 2 of Putative tyrosine-protein phosphatase auxilin	24	6.40612	6.29696	5.9726	6.0491	6.45792	6.16479	6.35778	6.14235	6.50116	6.18913	6.45039	6.18561	6.33387	6.15445	6.34566	5.9921	6.18119	1.03639	1.01873	0.966253	0.97863	1.04477	0.997346	1.02857	0.993716	1.05176	1.00128	1.04355	1.00071	1.0247	0.995673	1.02661	0.969408	0.051565	0.0267697	-0.0495267	-0.0311653	0.0631838	-0.00383403	0.0406373	-0.00909506	0.0728114	0.00185085	0.0615006	0.0010301	0.0352015
tr|S4R305|S4R305_HUMAN	DNAJC6	S4R305_HUMAN Putative tyrosine-protein phosphatase auxilin (Fragment)	1	5.83888	7.40758	6.09044	6.06502	7.2452	7.32983	5.35308	3.19446	6.20128	6.01296	6.77405	6.17355	5.7086	7.16652	6.43956	6.99901	6.35048	0.919439	1.16646	0.959052	0.955049	1.14089	1.15422	0.842941	0.503027	0.976506	0.946851	1.0667	0.972139	0.898924	1.1285	1.01403	1.10212	-0.121174	0.222137	-0.0603192	-0.0663532	0.19016	0.206914	-0.246496	-0.991294	-0.0342996	-0.0787903	0.093153	-0.0407653	-0.153729
sp|P51452|DUS3_HUMAN	DUSP3	DUS3_HUMAN Dual specificity protein phosphatase 3	8	6.64243	6.13707	6.17324	6.44586	6.49276	5.7993	6.40769	6.42086	6.29642	6.20124	6.50557	6.03075	6.4572	6.02855	6.00573	5.95532	6.34965	1.04611	0.966521	0.972217	1.01515	1.02254	0.913326	1.00914	1.01121	0.991617	0.976627	1.02456	0.949777	1.01694	0.94943	0.945836	0.937897	0.065034	-0.049127	-0.0406492	0.0216958	0.0321548	-0.130798	0.0131273	0.0160895	-0.0121453	-0.0341203	0.0349984	-0.0743396	0.0242316
sp|Q9Y277|VDAC3_HUMAN	VDAC3	VDAC3_HUMAN Voltage-dependent anion-selective channel protein 3	58	6.61198	6.03293	6.08844	6.42829	6.40062	6.79326	6.9113	6.49739	5.46733	6.24399	6.29809	6.38313	6.25011	5.65462	5.85229	6.08623	6.29041	1.05112	0.959068	0.967892	1.02192	1.01752	1.07994	1.0987	1.0329	0.869153	0.992621	1.00122	1.01474	0.993593	0.898927	0.930351	0.967541	0.0719283	-0.0602952	-0.0470814	0.031281	0.0250576	0.11095	0.135803	0.0467063	-0.202318	-0.0106858	0.00176032	0.02111	-0.00927247
sp|P21796|VDAC1_HUMAN	VDAC1	VDAC1_HUMAN Voltage-dependent anion-selective channel protein 1	84	6.54458	5.88581	5.86821	6.2008	6.3048	7.07844	6.71054	6.38322	5.87617	6.35795	6.4942	6.29179	6.17496	5.88573	5.99986	5.94296	6.12485	1.06853	0.960972	0.958099	1.0124	1.02938	1.15569	1.09563	1.04218	0.959398	1.03806	1.0603	1.02726	1.00818	0.960959	0.979593	0.970303	0.0956261	-0.0574335	-0.061754	0.0177798	0.0417761	0.208757	0.131754	0.0596099	-0.0597984	0.0538872	0.0844773	0.038796	0.0117553
sp|Q92979|NEP1_HUMAN	EMG1	NEP1_HUMAN Ribosomal RNA small subunit methyltransferase NEP1	18	6.132	6.01307	6.31887	5.92744	6.29735	7.31136	5.93049	6.56469	6.08088	6.13108	6.02234	6.41857	5.93424	6.22381	6.16194	6.53187	6.09785	1.0056	0.986098	1.03625	0.972055	1.03272	1.19901	0.972555	1.07656	0.997218	1.00545	0.987618	1.0526	0.97317	1.02066	1.01051	1.07118	0.00805822	-0.0201977	0.0513671	-0.0408903	0.0464454	0.26184	-0.0401482	0.106427	-0.00401936	0.00784175	-0.0179753	0.0739524	-0.0392362
sp|P53814-6|SMTN_HUMAN	SMTN	SMTN_HUMAN Isoform B3 of Smoothelin	9	5.84345	6.23739	6.53138	6.85489	5.9502	5.55572	6.33407	5.82581	5.97257	6.50014	6.39831	6.44917	6.52257	6.38327	6.38196	6.2591	6.36678	0.917803	0.979678	1.02585	1.07667	0.93457	0.872611	0.994863	0.915033	0.938084	1.02095	1.00495	1.01294	1.02447	1.00259	1.00238	0.983088	-0.123743	-0.0296209	0.0368245	0.10657	-0.0976252	-0.196589	-0.00743054	-0.128105	-0.0922115	0.0299074	0.00712755	0.0185502	0.0348772
sp|Q9UPP1|PHF8_HUMAN	PHF8	PHF8_HUMAN Histone lysine demethylase PHF8	5	5.75078	6.53068	7.01969	5.99087	6.01942	5.17502	5.51272	6.92193	6.77344	6.47234	5.71671	6.53954	6.05438	6.39008	6.61654	6.51587	6.32301	0.909501	1.03284	1.11018	0.947472	0.951987	0.818443	0.871851	1.09472	1.07124	1.02362	0.904113	1.03425	0.957516	1.01061	1.04642	1.0305	-0.136853	0.0466229	0.150797	-0.0778448	-0.0709859	-0.289046	-0.197846	0.130564	0.0992784	0.033677	-0.145425	0.0485788	-0.0626311
sp|Q86VP6|CAND1_HUMAN	CAND1	CAND1_HUMAN Cullin-associated NEDD8-dissociated protein 1	102	6.70166	5.83065	5.88932	6.084	6.35155	6.88198	6.53639	5.87951	5.56948	5.98252	6.85705	6.51355	6.33891	6.18896	6.16669	6.22775	6.12641	1.0939	0.951724	0.961301	0.993078	1.03675	1.12333	1.06692	0.959699	0.909094	0.976514	1.11926	1.06319	1.03469	1.01021	1.00658	1.01654	0.129477	-0.0713846	-0.0569403	-0.0100212	0.0520674	0.167782	0.0934527	-0.0593454	-0.137499	-0.034288	0.162547	0.0884027	0.0491935
sp|O75155|CAND2_HUMAN	CAND2	CAND2_HUMAN Cullin-associated NEDD8-dissociated protein 2	23	6.39631	5.98589	6.20562	6.46889	6.32195	6.09239	6.51567	5.44926	6.16481	6.3371	6.59145	6.34015	6.42303	6.05433	6.37831	6.27482	6.26418	1.02109	0.955575	0.990652	1.03268	1.00922	0.972576	1.04015	0.869908	0.984137	1.01164	1.05225	1.01213	1.02536	0.9665	1.01822	1.0017	0.0301148	-0.0655593	-0.0135497	0.0463931	0.0132445	-0.0401168	0.0567884	-0.201065	-0.0230687	0.0166977	0.0734708	0.0173919	0.0361289
sp|P12259|FA5_HUMAN	F5	FA5_HUMAN Coagulation factor V	13	10.6977	5.06646	4.88056	5.45208	4.37865	7.67313	5.30526	16.6812	5.01889	5.33003	5.17447	5.85661	4.51319	4.82101	4.151	4.99982	6.5242	1.6397	0.776564	0.74807	0.83567	0.67114	1.1761	0.813166	2.55682	0.769273	0.816963	0.793119	0.897675	0.691761	0.738943	0.636247	0.76635	0.713428	-0.364823	-0.418754	-0.258994	-0.575315	0.234014	-0.298378	1.35435	-0.378433	-0.291657	-0.33439	-0.155735	-0.531653
sp|P98194-7|AT2C1_HUMAN	ATP2C1	AT2C1_HUMAN Isoform 7 of Calcium-transporting ATPase type 2C member 1	18	6.54578	5.73653	6.07612	6.31672	6.09986	6.48871	6.25368	6.73144	5.85486	6.22933	6.67825	6.47158	6.19349	6.29754	5.91826	6.10785	6.16879	1.06111	0.929928	0.984978	1.02398	0.988826	1.05186	1.01376	1.09121	0.94911	1.00981	1.08259	1.04908	1.004	1.02087	0.959388	0.990122	0.0855782	-0.104809	-0.0218366	0.0341887	-0.0162108	0.0729447	0.0197184	0.125928	-0.0753523	0.0140901	0.114483	0.069131	0.00576564
sp|Q96ST3|SIN3A_HUMAN	SIN3A	SIN3A_HUMAN Paired amphipathic helix protein Sin3a	36	6.08491	6.50145	6.83853	6.57593	6.2839	5.35416	6.14853	6.39734	6.39695	6.26037	5.92497	5.74454	6.08875	6.57334	6.43411	6.39223	6.5002	0.93611	1.00019	1.05205	1.01165	0.966723	0.823691	0.945898	0.984175	0.984115	0.963103	0.911505	0.883748	0.936701	1.01125	0.989832	0.983389	-0.0952493	0.000276296	0.073201	0.0167097	-0.048825	-0.279825	-0.0802437	-0.0230131	-0.023101	-0.0542373	-0.133677	-0.178294	-0.0943391
sp|Q12888-2|TP53B_HUMAN	TP53BP1	TP53B_HUMAN Isoform 2 of Tumor suppressor p53-binding protein 1	63	6.16497	6.3431	6.28894	6.2296	6.11955	5.80741	6.20666	6.25392	6.52912	6.57444	6.64611	6.12783	6.13672	6.06184	6.26776	6.24202	6.25665	0.985346	1.01382	1.00516	0.995676	0.978087	0.928198	0.99201	0.999563	1.04355	1.05079	1.06225	0.97941	0.980831	0.968863	1.00178	0.997661	-0.0212971	0.0197971	0.00742589	-0.00625145	-0.0319654	-0.107496	-0.0115739	-0.000630213	0.0614976	0.071477	0.0871192	-0.0300147	-0.0279232
sp|Q9H0R6|GATA_HUMAN	QRSL1	GATA_HUMAN Glutamyl-tRNA(Gln) amidotransferase subunit A, mitochondrial	21	6.22917	6.18342	6.17097	6.44882	6.51417	5.781	6.47458	5.8584	6.19163	6.55117	6.46962	6.30572	6.28171	6.19044	6.19447	6.15471	6.25809	0.995378	0.988067	0.986078	1.03048	1.04092	0.923764	1.03459	0.936132	0.989379	1.04683	1.0338	1.00761	1.00377	0.989189	0.989833	0.98348	-0.00668361	-0.0173186	-0.0202263	0.0433116	0.0578578	-0.114404	0.0490631	-0.0952169	-0.0154043	0.066029	0.0479574	0.0109376	0.00543378
sp|Q8NFC6|BD1L1_HUMAN	BOD1L1	BD1L1_HUMAN Biorientation of chromosomes in cell division protein 1-like 1	69	6.28488	5.93062	6.22415	6.48991	6.25263	6.97072	6.26016	6.61313	5.88553	6.33695	6.20109	6.31287	5.83723	6.18271	6.05881	6.15861	6.23239	1.00842	0.95158	0.998678	1.04132	1.00325	1.11847	1.00446	1.06109	0.944346	1.01678	0.994978	1.01291	0.936596	0.992029	0.972149	0.988162	0.0120997	-0.0716026	-0.00190869	0.058413	0.00467763	0.161522	0.00641402	0.0855477	-0.0826132	0.0240031	-0.00726369	0.0185105	-0.0945016
sp|Q96IK1|BOD1_HUMAN	BOD1	BOD1_HUMAN Biorientation of chromosomes in cell division protein 1	5	3.57399	3.70275	4.31254	5.26633	1.96763	3.81209	4.71677	33.1116	3.93022	5.02192	3.61963	6.15313	3.67628	5.4802	5.79685	5.85813	4.2139	0.848143	0.878699	1.02341	1.24975	0.466938	0.904646	1.11934	7.8577	0.932679	1.19175	0.858973	1.4602	0.872417	1.3005	1.37565	1.39019	-0.237621	-0.18656	0.0333809	0.321641	-1.0987	-0.144575	0.162642	2.97411	-0.100547	0.253082	-0.219315	0.546164	-0.19691
sp|Q96QT4|TRPM7_HUMAN	TRPM7	TRPM7_HUMAN Transient receptor potential cation channel subfamily M member 7	14	5.99082	6.22034	6.50892	6.14394	6.36605	6.00876	5.85344	6.08447	6.71267	6.54001	6.05191	6.18264	6.13679	6.82871	6.19997	6.17056	6.21601	0.963773	1.0007	1.04712	0.988407	1.02414	0.966659	0.941672	0.978839	1.0799	1.05212	0.973601	0.994632	0.987256	1.09857	0.99742	0.992689	-0.0532342	0.00100578	0.0664305	-0.0168235	0.0344108	-0.0489204	-0.0867029	-0.0308561	0.110899	0.0733052	-0.0385971	-0.00776466	-0.0185034
sp|Q9UJP4|KLH21_HUMAN	KLHL21	KLH21_HUMAN Kelch-like protein 21	2	6.5617	6.46339	6.71065	7.15137	5.35521	4.18758	6.8457	5.80099	6.787	7.01561	5.86492	6.34281	7.11334	6.37751	5.32338	6.09884	6.72178	0.976185	0.96156	0.998345	1.06391	0.796696	0.622987	1.01844	0.863014	1.0097	1.04371	0.872525	0.943621	1.05825	0.948783	0.79196	0.907325	-0.0347732	-0.0565517	-0.00239027	0.0893769	-0.3279	-0.682726	0.0263553	-0.212544	0.0139312	0.0617258	-0.196731	-0.0837207	0.0816843
sp|P78362-2|SRPK2_HUMAN	SRPK2	SRPK2_HUMAN Isoform 2 of SRSF protein kinase 2	28	6.04577	6.43943	7.08238	5.90514	6.69305	6.64735	5.38438	6.29686	6.6169	6.16443	5.28748	5.80185	5.94696	7.02084	6.27626	6.39093	6.36818	0.949372	1.01119	1.11215	0.927288	1.05101	1.04384	0.845513	0.988801	1.03906	0.968005	0.830297	0.911069	0.933856	1.10249	0.985566	1.00357	-0.074955	0.0160519	0.153353	-0.10891	0.0717827	0.0618982	-0.242101	-0.0162485	0.0552744	-0.0469136	-0.268301	-0.134368	-0.0987287
sp|Q96SB4|SRPK1_HUMAN	SRPK1	SRPK1_HUMAN SRSF protein kinase 1	30	6.05268	6.54844	7.11161	5.85536	7.00169	6.3547	5.3058	6.03262	6.93132	6.04978	5.20057	5.70691	5.90609	7.11578	6.50959	6.31705	6.39202	0.946912	1.02447	1.11258	0.916042	1.09538	0.994161	0.830066	0.943773	1.08437	0.946458	0.813603	0.892818	0.923978	1.11323	1.01839	0.988271	-0.0786984	0.0348788	0.153904	-0.126515	0.131431	-0.00844847	-0.268702	-0.0834878	0.116858	-0.0793898	-0.297603	-0.163563	-0.114069
sp|O95782|AP2A1_HUMAN	AP2A1	AP2A1_HUMAN AP-2 complex subunit alpha-1	73	6.29389	6.45756	6.68148	5.93217	6.15491	6.4138	5.7877	5.85006	6.67319	5.86065	5.65012	6.07237	6.4525	6.48657	6.62331	6.60973	6.34127	0.992528	1.01834	1.05365	0.935485	0.970611	1.01144	0.912703	0.922537	1.05234	0.924207	0.891007	0.957594	1.01754	1.02291	1.04448	1.04233	-0.010821	0.0262162	0.0753948	-0.096213	-0.0430352	0.0164064	-0.131783	-0.116322	0.0736036	-0.113712	-0.166491	-0.0625132	0.0250853
sp|O94973|AP2A2_HUMAN	AP2A2	AP2A2_HUMAN AP-2 complex subunit alpha-2	24	6.23015	6.29558	6.43082	5.92371	6.11837	6.13642	5.75655	5.98341	6.7133	6.01393	6.13047	6.48281	6.36192	6.33433	6.53308	6.55514	6.22006	1.00162	1.01214	1.03388	0.952355	0.98365	0.986552	0.925481	0.961953	1.0793	0.96686	0.985596	1.04224	1.02281	1.01837	1.05032	1.05387	0.00233724	0.0174096	0.0480731	-0.0704286	-0.0237823	-0.0195324	-0.111725	-0.0559617	0.110092	-0.0486216	-0.020932	0.0596896	0.0325326
sp|Q15293|RCN1_HUMAN	RCN1	RCN1_HUMAN Reticulocalbin-1	10	6.13448	5.7846	6.03431	6.54919	5.80376	7.06184	6.6117	6.58252	5.61518	6.35534	6.53337	6.95775	6.07242	5.73108	6.00298	6.16949	6.12564	1.00144	0.944325	0.98509	1.06914	0.947453	1.15283	1.07935	1.07458	0.916668	1.0375	1.06656	1.13584	0.991311	0.935588	0.979975	1.00716	0.0020793	-0.0826446	-0.0216729	0.0964547	-0.0778739	0.205182	0.11016	0.103778	-0.125529	0.0531075	0.0929656	0.183759	-0.0125902
sp|O15382|BCAT2_HUMAN	BCAT2	BCAT2_HUMAN Branched-chain-amino-acid aminotransferase, mitochondrial	28	6.15169	5.86395	6.35488	6.65084	5.89453	6.56022	6.43181	6.52846	5.67265	6.21661	6.4741	6.7859	6.1887	5.99868	6.12107	6.10592	6.25534	0.98343	0.937431	1.01591	1.06323	0.94232	1.04874	1.02821	1.04366	0.906849	0.993808	1.03497	1.08482	0.989347	0.958969	0.978535	0.976113	-0.0241055	-0.0932155	0.0227766	0.0884483	-0.0857115	0.0686559	0.0401365	0.0616544	-0.141065	-0.00896023	0.0495913	0.117452	-0.0154519
sp|P30038|AL4A1_HUMAN	ALDH4A1	AL4A1_HUMAN Delta-1-pyrroline-5-carboxylate dehydrogenase, mitochondrial	29	6.43189	6.126	6.1097	6.27338	6.28769	6.42178	6.24495	6.39294	6.08084	6.43148	6.47722	6.47435	6.12692	5.90505	6.05312	6.16267	6.23524	1.03154	0.98248	0.979866	1.00612	1.00841	1.02992	1.00156	1.02529	0.975237	1.03147	1.03881	1.03835	0.982627	0.947044	0.970791	0.988361	0.0447971	-0.0255003	-0.0293441	0.00879728	0.0120844	0.0425276	0.00224435	0.0360339	-0.036175	0.0447051	0.0549291	0.0542897	-0.0252837
sp|P67809|YBOX1_HUMAN	YBX1	YBOX1_HUMAN Nuclease-sensitive element-binding protein 1	22	5.68842	5.91294	6.48126	5.47315	6.33523	7.24523	5.14994	6.13392	7.08426	6.15756	5.89786	5.87491	6.17647	7.32317	6.57298	6.49271	5.88894	0.965949	1.00408	1.10058	0.929394	1.07578	1.23031	0.87451	1.0416	1.20298	1.04561	1.00151	0.997617	1.04882	1.24355	1.11616	1.10253	-0.0499806	0.00586705	0.138266	-0.105637	0.105388	0.299023	-0.193453	0.0588008	0.266609	0.0643502	0.00218299	-0.00344184	0.068774
sp|P16989|YBOX3_HUMAN	YBX3	YBOX3_HUMAN Y-box-binding protein 3	31	5.93227	6.33457	6.56598	6.07762	6.49339	7.51845	5.41444	5.97099	6.66735	6.16603	5.43714	6.02165	6.1884	6.85277	6.22062	6.13835	6.22761	0.952576	1.01718	1.05433	0.975915	1.04268	1.20728	0.869425	0.958793	1.07061	0.990112	0.87307	0.966928	0.993704	1.10039	0.998878	0.985667	-0.0700943	0.0245681	0.0763318	-0.0351721	0.0602933	0.271757	-0.201866	-0.0607084	0.0984349	-0.0143367	-0.195831	-0.0485197	-0.00911215
sp|P16989-2|YBOX3_HUMAN	YBX3	YBOX3_HUMAN Isoform 2 of Y-box-binding protein 3	4	5.64048	6.71465	5.40581	5.43606	5.51339	8.72961	5.08169	6.90281	6.52461	6.8882	5.6114	6.60508	5.28437	7.42982	5.91443	6.31761	5.79925	0.972622	1.15785	0.932157	0.937373	0.950707	1.5053	0.876267	1.19029	1.12508	1.18777	0.967608	1.13895	0.911216	1.28117	1.01986	1.08938	-0.0400484	0.211446	-0.101356	-0.093305	-0.0729267	0.590051	-0.190558	0.251317	0.170025	0.248261	-0.0475056	0.18771	-0.134135
sp|Q6XR72|ZNT10_HUMAN	SLC30A10	ZNT10_HUMAN Zinc transporter 10	8	5.85582	5.7764	6.28033	6.78843	6.29744	6.65356	6.47972	6.23343	5.70882	6.28219	6.59365	6.80161	6.05528	5.93644	5.94002	6.31686	6.17525	0.948273	0.935412	1.01702	1.0993	1.01979	1.07746	1.04931	1.00942	0.924469	1.01732	1.06776	1.10143	0.980573	0.961329	0.961908	1.02293	-0.0766252	-0.0963257	0.024344	0.136582	0.0282691	0.10763	0.0694351	0.0135299	-0.113304	0.0247712	0.0945809	0.13938	-0.0283027
sp|O94964-2|SOGA1_HUMAN	SOGA1	SOGA1_HUMAN Isoform 2 of Protein SOGA1	13	5.69463	6.83025	7.36038	5.98215	6.40941	5.48131	5.37695	6.33221	7.34717	5.92842	5.03104	5.55645	6.37528	7.53148	6.40801	6.35486	6.46685	0.880588	1.05619	1.13817	0.925048	0.991117	0.847601	0.831463	0.97918	1.13613	0.91674	0.777974	0.85922	0.98584	1.16463	0.990901	0.982682	-0.183462	0.0788747	0.186717	-0.1124	-0.0128721	-0.238543	-0.266276	-0.0303546	0.184125	-0.125416	-0.362207	-0.2189	-0.020575
sp|Q9BUN8|DERL1_HUMAN	DERL1	DERL1_HUMAN Derlin-1	9	6.18068	6.02789	6.05765	6.09201	5.63891	6.82625	6.24007	6.04544	6.10289	6.38135	6.82889	6.94277	6.00192	6.23638	5.89063	6.50626	6.08956	1.01496	0.989873	0.99476	1.0004	0.925997	1.12098	1.02472	0.992755	1.00219	1.04792	1.12141	1.14011	0.985609	1.02411	0.967333	1.06843	0.0214282	-0.0146843	-0.00757917	0.000580912	-0.110921	0.164756	0.0352248	-0.0104901	0.00315519	0.0675243	0.165314	0.189174	-0.0209133
sp|O60784|TOM1_HUMAN	TOM1	TOM1_HUMAN Target of Myb protein 1	9	6.44898	6.18263	6.89889	6.91388	5.70433	5.84677	6.53479	5.93339	5.98518	6.15932	6.42859	6.63351	6.31578	6.0366	5.89202	6.08535	6.61109	0.975478	0.93519	1.04353	1.0458	0.862842	0.884388	0.988458	0.89749	0.905324	0.931664	0.972394	1.00339	0.95533	0.913101	0.891232	0.920475	-0.0358183	-0.0966686	0.061475	0.0646063	-0.212832	-0.177249	-0.0167484	-0.156033	-0.143495	-0.102118	-0.0403869	0.0048832	-0.0659283
tr|E9PCH4|E9PCH4_HUMAN	FNIP1	E9PCH4_HUMAN Folliculin-interacting protein 1	23	5.95702	6.19384	6.3832	6.05826	6.10798	5.49845	6.09465	6.07195	7.05197	6.56311	6.42962	6.13132	6.38835	6.49194	6.3134	6.26494	6.14808	0.968924	1.00744	1.03824	0.985391	0.993478	0.894336	0.991309	0.987617	1.14702	1.06751	1.04579	0.997274	1.03908	1.05593	1.02689	1.01901	-0.0455451	0.0106982	0.0541439	-0.0212324	-0.0094406	-0.161111	-0.0125926	-0.017976	0.19789	0.0942437	0.0645975	-0.00393824	0.0553074
sp|Q9Y4G8|RPGF2_HUMAN	RAPGEF2	RPGF2_HUMAN Rap guanine nucleotide exchange factor 2	11	6.09693	6.31763	6.43451	5.79237	6.20392	5.7896	5.95269	6.28516	6.73781	6.50424	6.48009	6.70625	6.17832	6.03284	6.31018	6.17746	6.16036	0.989704	1.02553	1.0445	0.940265	1.00707	0.939815	0.966289	1.02026	1.09374	1.05582	1.0519	1.08861	1.00292	0.9793	1.02432	1.00278	-0.0149317	0.0363688	0.0628156	-0.0888609	0.0101654	-0.089551	-0.0494729	0.0289348	0.129265	0.0783658	0.0729992	0.122492	0.00419993
sp|Q8TF40|FNIP1_HUMAN	FNIP1	FNIP1_HUMAN Folliculin-interacting protein 1	9	6.50854	6.20896	6.44522	6.64745	6.14076	5.78221	6.7376	6.46616	6.30512	5.97566	6.55094	6.16929	6.0248	6.13085	6.16326	5.7432	6.45254	1.00868	0.96225	0.998865	1.03021	0.951681	0.896113	1.04418	1.00211	0.977153	0.926094	1.01525	0.956102	0.933709	0.950145	0.955168	0.890068	0.0124662	-0.0555161	-0.00163813	0.0429333	-0.0714505	-0.158247	0.062367	0.00304147	-0.0333439	-0.11077	0.0218342	-0.0647633	-0.0989544
tr|H0Y8T6|H0Y8T6_HUMAN	RAPGEF2	H0Y8T6_HUMAN Rap guanine nucleotide exchange factor 2 (Fragment)	1	6.51357	5.83479	6.52964	6.49496	4.85259	6.87694	6.71371	6.90446	4.32234	6.48187	7.68892	6.49073	5.6011	6.74995	5.86857	6.07586	6.34324	1.02685	0.919844	1.02939	1.02392	0.765002	1.08414	1.0584	1.08848	0.681409	1.02185	1.21214	1.02325	0.883003	1.06412	0.925169	0.957848	0.0382286	-0.120539	0.0417835	0.0341007	-0.386465	0.116547	0.0818903	0.122309	-0.553407	0.0311902	0.277561	0.0331608	-0.17951
sp|Q674X7-3|KAZRN_HUMAN	KAZN	KAZRN_HUMAN Isoform 3 of Kazrin	1	6.01419	6.40144	6.95053	6.91123	5.67643	6.55164	6.71606	5.44304	5.4054	6.21567	6.33619	6.82556	5.75826	6.41606	6.07035	6.30794	6.56935	0.915493	0.974441	1.05802	1.05204	0.864078	0.997305	1.02233	0.828551	0.822821	0.946162	0.964508	1.039	0.876535	0.976666	0.924042	0.960208	-0.12738	-0.0373536	0.0813729	0.0731924	-0.210766	-0.003894	0.031865	-0.271337	-0.281349	-0.0798402	-0.0521345	0.0551973	-0.190117
sp|Q674X7|KAZRN_HUMAN	KAZN	KAZRN_HUMAN Kazrin	8	6.47711	6.09979	6.27457	6.16021	6.11783	6.48595	6.4023	6.37104	6.03885	6.23119	6.30147	6.59627	6.32633	6.04916	6.14372	5.9242	6.25292	1.03585	0.975511	1.00346	0.985173	0.978396	1.03727	1.02389	1.01889	0.965765	0.996525	1.00776	1.05491	1.01174	0.967414	0.982536	0.947429	0.0508202	-0.0357705	0.00498653	-0.0215505	-0.03151	0.0527878	0.0340602	0.0269988	-0.0502562	-0.00502235	0.0111584	0.0771204	0.0168388
sp|Q1ED39|KNOP1_HUMAN	KNOP1	KNOP1_HUMAN Lysine-rich nucleolar protein 1	12	5.43749	6.72197	7.88124	5.57934	6.46951	6.71863	4.83079	5.84956	7.50013	5.69342	4.84541	5.32176	5.97423	7.23498	6.97131	6.97022	6.40501	0.848943	1.04949	1.23048	0.87109	1.01007	1.04896	0.754221	0.913279	1.17098	0.888901	0.756503	0.830875	0.932743	1.12958	1.08842	1.08824	-0.23626	0.0696833	0.299222	-0.199106	0.0144556	0.0689663	-0.406942	-0.130873	0.227715	-0.169905	-0.402582	-0.267297	-0.100448
sp|P12270|TPR_HUMAN	TPR	TPR_HUMAN Nucleoprotein TPR	146	6.47178	6.44581	6.17194	6.1789	6.54011	5.91604	6.30825	6.36664	6.4374	6.26477	6.15875	5.98089	6.3611	6.1566	6.17884	6.06219	6.31711	1.02448	1.02037	0.97702	0.978122	1.0353	0.936511	0.998598	1.00784	1.01904	0.991715	0.974932	0.946777	1.00696	0.974592	0.978112	0.959646	0.0348984	0.0290975	-0.0335401	-0.0319141	0.0500508	-0.0946323	-0.00202429	0.0112681	0.027214	-0.0120026	-0.0366266	-0.0789039	0.0100121
sp|Q15154|PCM1_HUMAN	PCM1	PCM1_HUMAN Pericentriolar material 1 protein	58	4.57701	7.32249	7.6828	5.37219	6.35357	5.36941	4.91199	5.44534	9.19536	5.87204	5.61924	4.54458	6.34062	7.26565	7.53994	6.58778	6.23862	0.733657	1.17374	1.23149	0.861118	1.01843	0.860672	0.787352	0.872843	1.47394	0.94124	0.900718	0.728459	1.01635	1.16462	1.20859	1.05597	-0.446822	0.231107	0.300405	-0.215717	0.0263399	-0.216464	-0.34492	-0.196205	0.559679	-0.0873657	-0.150852	-0.457081	0.0233964
tr|E7ETA6|E7ETA6_HUMAN	PCM1	E7ETA6_HUMAN Pericentriolar material 1 protein	1	6.19195	6.85079	7.2413	7.1554	6.34066	6.10214	5.43	5.80175	6.00805	6.27527	6.88727	5.63529	5.98879	5.9848	5.63541	6.47113	6.85986	0.902635	0.998678	1.0556	1.04308	0.924313	0.889543	0.791561	0.845753	0.875827	0.914781	1.004	0.821488	0.873019	0.872438	0.821505	0.943333	-0.147785	-0.00190877	0.0780696	0.0608533	-0.113546	-0.168864	-0.337227	-0.241691	-0.191282	-0.128502	0.0057531	-0.283689	-0.195915
sp|P27482|CALL3_HUMAN	CALML3	CALL3_HUMAN Calmodulin-like protein 3	17	5.43529	6.78172	6.33896	6.71035	3.54494	6.77173	6.8887	6.09124	5.7002	6.5791	6.46984	7.22086	6.24154	6.11743	6.57048	6.53763	6.31658	0.86048	1.07364	1.00354	1.06234	0.561212	1.07206	1.09057	0.964326	0.902419	1.04156	1.02426	1.14316	0.98812	0.968472	1.0402	1.035	-0.216787	0.102508	0.00510252	0.0872444	-0.833382	0.100381	0.125088	-0.0524077	-0.148131	0.0587466	0.0345864	0.193027	-0.0172416
sp|P62158|CALM_HUMAN	CALM1	CALM_HUMAN Calmodulin	24	5.26442	6.37536	6.15952	6.50467	3.21949	7.25377	6.56131	6.63231	5.98769	6.76499	6.67438	7.02098	6.3746	5.82214	6.61356	6.77083	6.07599	0.86643	1.04927	1.01375	1.07055	0.529871	1.19384	1.07987	1.09156	0.985467	1.1134	1.09848	1.15553	1.04915	0.95822	1.08847	1.11436	-0.206845	0.0693867	0.0196978	0.0983558	-0.916288	0.255611	0.110864	0.126391	-0.0211206	0.154968	0.135514	0.208552	0.0692147
sp|P02585|TNNC2_HUMAN	TNNC2	TNNC2_HUMAN Troponin C, skeletal muscle	4	5.38378	6.1832	6.51865	6.78759	3.36301	6.76487	7.12328	6.64099	5.7095	6.60007	6.39887	6.58972	6.4313	6.38288	6.59413	6.52818	6.21831	0.865795	0.994355	1.0483	1.09155	0.540824	1.0879	1.14553	1.06797	0.918176	1.06139	1.02904	1.05973	1.03425	1.02647	1.06044	1.04983	-0.207902	-0.00816771	0.0680518	0.126378	-0.886768	0.121541	0.19602	0.0948769	-0.123157	0.0859599	0.0412958	0.0836958	0.048589
sp|Q9NU22|MDN1_HUMAN	MDN1	MDN1_HUMAN Midasin	167	6.4853	6.35918	6.30476	6.49385	6.1874	5.83701	6.15267	6.02801	6.44305	6.34619	6.38615	6.36737	6.19065	6.1826	6.05512	6.18068	6.41077	1.01163	0.991952	0.983463	1.01296	0.965157	0.9105	0.959739	0.940294	1.00503	0.989926	0.996159	0.99323	0.965664	0.964408	0.944523	0.964108	0.0166751	-0.0116575	-0.0240568	0.0185758	-0.0511649	-0.135269	-0.0592856	-0.0888164	0.00724558	-0.0146075	-0.00555177	-0.00980061	-0.0504073
sp|Q969T9|WBP2_HUMAN	WBP2	WBP2_HUMAN WW domain-binding protein 2	13	6.70556	6.16705	6.20221	6.54787	6.42887	6.95528	6.35462	5.65818	5.84185	6.32637	6.39672	5.87877	6.3188	5.29094	6.47719	6.44971	6.40567	1.04682	0.962748	0.968237	1.0222	1.00362	1.0858	0.99203	0.883308	0.911981	0.98762	0.998602	0.917744	0.986438	0.825977	1.01116	1.00687	0.0660078	-0.0547695	-0.0465677	0.0316756	0.00521514	0.118759	-0.0115442	-0.179012	-0.132925	-0.0179721	-0.00201771	-0.123836	-0.0196994
sp|O75569|PRKRA_HUMAN	PRKRA	PRKRA_HUMAN Interferon-inducible double-stranded RNA-dependent protein kinase activator A	16	5.4699	6.85654	7.72677	5.20244	6.41285	5.74358	4.91663	5.91802	8.18066	5.99936	4.86924	5.27254	6.84876	7.07389	6.84094	6.66788	6.31391	0.866325	1.08594	1.22377	0.823965	1.01567	0.909671	0.778698	0.937298	1.29566	0.950181	0.771192	0.835067	1.08471	1.12037	1.08347	1.05606	-0.20702	0.118946	0.291331	-0.279346	0.0224314	-0.136584	-0.360864	-0.0934197	0.373683	-0.0737257	-0.374838	-0.260036	0.117309
sp|Q8N163|CCAR2_HUMAN	CCAR2	CCAR2_HUMAN Cell cycle and apoptosis regulator protein 2	58	5.87887	5.98927	5.94069	6.05701	6.3012	5.75674	6.24825	6.38047	6.67534	6.74921	6.36122	6.39521	6.19632	6.36256	6.3935	6.31415	5.96646	0.98532	1.00382	0.995681	1.01518	1.0561	0.96485	1.04723	1.06939	1.11881	1.13119	1.06616	1.07186	1.03853	1.06639	1.07157	1.05827	-0.0213363	0.00550496	-0.0062447	0.0217306	0.0787514	-0.0516232	0.066577	0.0967875	0.161966	0.177843	0.0924283	0.100117	0.0545364
sp|O94776|MTA2_HUMAN	MTA2	MTA2_HUMAN Metastasis-associated protein MTA2	52	6.01422	6.60712	6.57562	6.47411	6.38114	5.4137	6.24133	5.84087	6.36735	6.51068	6.00065	6.02589	6.34079	6.56782	6.32047	6.31823	6.41777	0.93712	1.0295	1.0246	1.00878	0.994293	0.843549	0.972508	0.910109	0.992144	1.01448	0.935006	0.938939	0.988006	1.02338	0.984839	0.98449	-0.0936939	0.04195	0.0350554	0.0126104	-0.00825734	-0.245457	-0.040218	-0.135888	-0.0113785	0.0207367	-0.0969527	-0.0908972	-0.0174089
sp|Q13330-3|MTA1_HUMAN	MTA1	MTA1_HUMAN Isoform 3 of Metastasis-associated protein MTA1	22	6.1924	6.30787	6.41305	6.4071	6.2028	5.41479	6.25502	6.4975	6.29206	6.46744	6.17545	6.26451	6.04692	6.55555	6.16984	6.33772	6.3301	0.978246	0.996487	1.0131	1.01216	0.979889	0.855403	0.988138	1.02644	0.99399	1.0217	0.975568	0.989638	0.955264	1.03561	0.974682	1.0012	-0.0317308	-0.0050765	0.0187812	0.0174421	-0.0293098	-0.225324	-0.0172149	0.0376553	-0.008697	0.0309653	-0.0356852	-0.0150278	-0.0660289
sp|Q9BTC8|MTA3_HUMAN	MTA3	MTA3_HUMAN Metastasis-associated protein MTA3	7	5.99946	6.28553	6.79328	6.84965	6.23868	5.68027	6.08573	6.18573	6.29478	6.31266	6.09913	6.05369	5.97809	6.68341	6.49802	5.9619	6.48198	0.92556	0.969693	1.04803	1.05672	0.962465	0.876317	0.938869	0.954296	0.97112	0.973878	0.940936	0.933926	0.922263	1.03108	1.00247	0.919765	-0.111602	-0.0444002	0.0676738	0.0795957	-0.0551938	-0.190475	-0.0910042	-0.0674907	-0.0422786	-0.0381865	-0.0878311	-0.0986198	-0.11675
sp|P55884-2|EIF3B_HUMAN	EIF3B	EIF3B_HUMAN Isoform 2 of Eukaryotic translation initiation factor 3 subunit B	102	6.28625	6.30717	6.32484	6.08407	6.37043	5.74258	6.11419	6.21706	6.65416	6.45778	6.21024	6.07174	6.38727	6.42794	6.25352	6.09076	6.25058	1.00571	1.00905	1.01188	0.97336	1.01917	0.918727	0.978179	0.994637	1.06457	1.03315	0.993546	0.971388	1.02187	1.02837	1.00047	0.974431	0.00820901	0.0130022	0.0170383	-0.0389539	0.0274001	-0.122292	-0.0318293	-0.00775814	0.0902659	0.0470477	-0.00934162	-0.0418806	0.0312088
tr|C9JQN7|C9JQN7_HUMAN	EIF3B	C9JQN7_HUMAN Eukaryotic translation initiation factor 3 subunit B (Fragment)	1	6.99288	6.10428	5.61842	5.64813	7.62405	4.6769	7.23646	6.75541	7.44316	6.13714	6.29137	5.05441	5.68264	6.12399	5.78832	6.82244	6.09093	1.14808	1.00219	0.922424	0.927302	1.25171	0.767847	1.18807	1.10909	1.22201	1.00759	1.03291	0.829826	0.932968	1.00543	0.950318	1.1201	0.199225	0.00315921	-0.116497	-0.108889	0.323896	-0.381109	0.248622	0.149381	0.289253	0.0109046	0.0467123	-0.269119	-0.100101
sp|Q8IZ83|A16A1_HUMAN	ALDH16A1	A16A1_HUMAN Aldehyde dehydrogenase family 16 member A1	21	6.53335	6.28729	6.24321	6.68176	6.1912	6.0945	6.62467	6.1673	5.60705	6.23846	6.52036	6.34591	6.18615	6.03281	6.0916	6.15439	6.4364	1.01506	0.976833	0.969984	1.03812	0.961904	0.94688	1.02925	0.958191	0.871147	0.969246	1.01304	0.985941	0.961119	0.937295	0.946429	0.956185	0.0215684	-0.0338162	-0.0439666	0.0539736	-0.0560355	-0.0787467	0.041594	-0.0616155	-0.199013	-0.0450646	0.0186971	-0.0204275	-0.0572127
sp|Q14692|BMS1_HUMAN	BMS1	BMS1_HUMAN Ribosome biogenesis protein BMS1 homolog	30	5.72585	6.38627	6.6683	5.36342	6.72614	6.82513	5.40379	6.10185	7.27131	6.02972	5.58556	6.05972	6.0739	6.67556	6.188	6.91549	6.03596	0.948623	1.05804	1.10476	0.888578	1.11434	1.13074	0.895266	1.01092	1.20467	0.998966	0.925381	1.00394	1.00629	1.10596	1.02519	1.14572	-0.0760934	0.0813903	0.143736	-0.17043	0.156196	0.177273	-0.159612	0.0156635	0.268632	-0.00149224	-0.111881	0.00566789	0.00903991
sp|P55263|ADK_HUMAN	ADK	ADK_HUMAN Adenosine kinase	40	6.31364	5.65943	5.54301	5.86448	6.33469	6.63041	6.56803	6.16543	6.07259	6.60923	6.89609	6.84481	6.07988	6.26188	6.08686	6.06956	5.84514	1.08015	0.968228	0.948311	1.00331	1.08375	1.13435	1.12367	1.0548	1.03891	1.13072	1.1798	1.17103	1.04016	1.0713	1.04135	1.03839	0.111234	-0.0465808	-0.076568	0.00476561	0.116036	0.181861	0.168223	0.0769639	0.0550744	0.177245	0.238541	0.227773	0.0568053
sp|Q14554|PDIA5_HUMAN	PDIA5	PDIA5_HUMAN Protein disulfide-isomerase A5	22	6.29687	6.22798	6.27668	6.31705	6.64356	6.63503	6.26352	5.89226	6.05662	6.24664	6.50839	6.32407	6.04085	5.94114	6.12076	6.20857	6.27965	1.00274	0.991773	0.999528	1.00596	1.05795	1.05659	0.997432	0.938311	0.964484	0.994744	1.03643	1.00707	0.961973	0.946095	0.974698	0.988682	0.00395188	-0.0119187	-0.000681344	0.00856799	0.0812735	0.07942	-0.00370935	-0.0918619	-0.0521701	-0.00760261	0.0516177	0.0101703	-0.0559314
sp|Q2NKX8|ERC6L_HUMAN	ERCC6L	ERC6L_HUMAN DNA excision repair protein ERCC-6-like	37	6.02211	6.36127	6.32078	6.07974	6.1484	5.69747	6.15715	6.01753	6.94028	6.35638	6.36218	6.28792	6.50076	6.2047	6.3996	6.14373	6.19597	0.971939	1.02668	1.02014	0.98124	0.992322	0.919544	0.993734	0.9712	1.12013	1.02589	1.02682	1.01484	1.04919	1.00141	1.03286	0.991568	-0.0410623	0.0379835	0.0287713	-0.0273217	-0.0111203	-0.12101	-0.00906861	-0.0421599	0.163663	0.0368741	0.0381899	0.0212515	0.0692771
sp|P53992|SC24C_HUMAN	SEC24C	SC24C_HUMAN Protein transport protein Sec24C	47	6.19058	6.53939	6.25864	6.30918	6.37185	5.76785	6.28022	5.72603	6.15418	6.313	6.30716	6.24087	6.64578	6.51626	6.22276	6.15624	6.32445	0.978833	1.03399	0.989595	0.997586	1.0075	0.911993	0.993007	0.90538	0.973078	0.99819	0.997267	0.986785	1.05081	1.03033	0.983922	0.973404	-0.0308649	0.0482166	-0.0150903	-0.00348694	0.0107729	-0.132906	-0.0101244	-0.143404	-0.0393728	-0.0026137	-0.00394892	-0.0191923	0.0714991
sp|Q63HN8-4|RN213_HUMAN	RNF213	RN213_HUMAN Isoform 2 of E3 ubiquitin-protein ligase RNF213	53	6.06729	6.31006	6.45916	6.27162	6.19762	5.73532	6.09492	6.52023	6.42982	6.42911	6.26716	6.50952	6.33535	6.20116	6.04473	6.12696	6.27703	0.966586	1.00526	1.02901	0.999138	0.987349	0.913699	0.970987	1.03874	1.02434	1.02423	0.998427	1.03704	1.00929	0.987913	0.962992	0.976092	-0.0490304	0.00757104	0.0412639	-0.00124453	-0.0183684	-0.130209	-0.0424754	0.0548402	0.0346957	0.0345364	-0.00227085	0.0524685	0.0133416
sp|P27708|PYR1_HUMAN	CAD	PYR1_HUMAN CAD protein	162	6.41015	6.17118	6.24635	6.18209	6.38865	5.85036	6.26826	5.8003	6.57375	6.36865	6.51589	6.33963	6.34951	6.20861	6.20767	6.11895	6.25244	1.02522	0.987003	0.999026	0.988748	1.02178	0.935692	1.00253	0.927685	1.05139	1.01859	1.04214	1.01394	1.01552	0.99299	0.992839	0.97865	0.0359382	-0.0188735	-0.00140648	-0.0163252	0.0310912	-0.0958945	0.00364514	-0.108292	0.0722967	0.0265677	0.0595424	0.0199788	0.0222254
sp|P31327-3|CPSM_HUMAN	CPS1	CPSM_HUMAN Isoform 3 of Carbamoyl-phosphate synthase [ammonia], mitochondrial	7	4.59622	5.02141	4.52887	5.89544	2.97885	7.39662	8.20436	11.1243	3.83025	5.81233	4.33358	5.90666	5.30113	6.1012	8.74257	10.2262	5.01049	0.91732	1.00218	0.903879	1.17662	0.594523	1.47623	1.63744	2.2202	0.764447	1.16003	0.864902	1.17886	1.05801	1.21769	1.74486	2.04096	-0.124502	0.00314227	-0.145799	0.234649	-0.750195	0.561916	0.711441	1.15069	-0.387512	0.214166	-0.209391	0.237392	0.0813497
sp|O94855-2|SC24D_HUMAN	SEC24D	SC24D_HUMAN Isoform 2 of Protein transport protein Sec24D	24	6.20775	6.19109	6.207	6.49592	6.34305	5.99616	6.26433	6.12123	6.30807	6.43449	6.48266	6.40911	6.21149	5.86643	6.27402	6.18721	6.27544	0.989214	0.986559	0.989094	1.03513	1.01077	0.955496	0.99823	0.975426	1.0052	1.02534	1.03302	1.0213	0.989809	0.934824	0.999774	0.98594	-0.0156462	-0.0195232	-0.0158205	0.0498172	0.0154601	-0.0656777	-0.0025564	-0.035895	0.00748205	0.0361092	0.0468693	0.0304074	-0.0147772
sp|Q08211|DHX9_HUMAN	DHX9	DHX9_HUMAN ATP-dependent RNA helicase A	93	5.50437	6.66214	6.88466	5.31557	6.18913	6.07634	5.22687	6.46828	7.71015	5.62522	5.22338	5.7738	6.38033	6.81315	6.85139	7.29523	6.09169	0.903587	1.09364	1.13017	0.872594	1.016	0.997481	0.858034	1.06182	1.26568	0.923426	0.857461	0.947817	1.04738	1.11843	1.12471	1.19757	-0.146264	0.129144	0.176544	-0.196617	0.0228953	-0.00363874	-0.220894	0.0865408	0.339918	-0.114932	-0.221858	-0.0773202	0.0667897
sp|P06454-2|PTMA_HUMAN	PTMA	PTMA_HUMAN Isoform 2 of Prothymosin alpha	18	7.00929	5.99642	5.9458	6.73549	6.66506	6.77129	6.59523	6.0744	5.57433	6.15164	6.35814	6.00566	6.16403	5.57602	6.18867	6.18852	6.42175	1.09149	0.933767	0.925885	1.04886	1.03789	1.05443	1.02701	0.94591	0.868039	0.957938	0.990095	0.935206	0.959868	0.868302	0.963705	0.963681	0.126302	-0.0988651	-0.111096	0.0688164	0.0536514	0.0764642	0.0384565	-0.0802246	-0.204168	-0.0619954	-0.0143617	-0.0966437	-0.0590926
sp|Q9NW82|WDR70_HUMAN	WDR70	WDR70_HUMAN WD repeat-containing protein 70	34	6.6745	6.04776	6.07265	6.29032	6.5295	6.49345	6.59628	6.29809	5.86034	6.18308	6.44606	6.29746	6.11788	6.15587	5.89369	6.04309	6.27131	1.06429	0.964354	0.968323	1.00303	1.04117	1.03542	1.05182	1.00427	0.934469	0.985932	1.02787	1.00417	0.975535	0.981593	0.939786	0.963609	0.0898935	-0.0523654	-0.04644	0.00436715	0.0582063	0.0502189	0.0728864	0.00614811	-0.0977819	-0.0204406	0.0396514	0.00600379	-0.0357345
sp|Q9BZD4|NUF2_HUMAN	NUF2	NUF2_HUMAN Kinetochore protein Nuf2	25	6.10077	6.31492	6.47057	5.87606	6.20716	5.51696	6.07919	6.11303	6.99319	6.41402	6.24357	6.2042	6.60249	6.20664	6.43696	6.22026	6.19058	0.985492	1.02009	1.04523	0.949194	1.00268	0.891186	0.982007	0.987473	1.12965	1.03609	1.00856	1.0022	1.06654	1.00259	1.0398	1.00479	-0.0210832	0.0286899	0.0638182	-0.0752255	0.00385875	-0.166201	-0.0261955	-0.0181869	0.175876	0.0511543	0.0122966	0.00317061	0.0929356
sp|Q7Z460|CLAP1_HUMAN	CLASP1	CLAP1_HUMAN CLIP-associating protein 1	49	5.96794	6.34644	6.57429	6.28274	6.22614	5.4649	6.25448	6.20535	6.58457	6.20031	6.13829	6.03493	6.48292	6.45307	6.33485	6.44878	6.29285	0.948368	1.00852	1.04472	0.998393	0.989399	0.86843	0.993902	0.986095	1.04636	0.985294	0.975438	0.959013	1.0302	1.02546	1.00667	1.02478	-0.0764811	0.0122334	0.063121	-0.00232025	-0.0153761	-0.203519	-0.00882418	-0.0202015	0.0653751	-0.0213738	-0.0358773	-0.0603771	0.0429296
tr|B7ZLX3|B7ZLX3_HUMAN	CLASP1	B7ZLX3_HUMAN CLASP1 protein	4	5.08771	6.33498	5.78766	6.02614	5.65572	4.48235	6.22825	4.93251	7.96001	7.61108	6.74066	8.02296	7.0001	6.40762	6.01754	5.70471	5.80912	0.875814	1.09052	0.996305	1.03736	0.973593	0.771605	1.07215	0.849097	1.37026	1.31019	1.16036	1.3811	1.20502	1.10303	1.03588	0.982026	-0.191304	0.12502	-0.00534008	0.0529139	-0.0386096	-0.374065	0.100507	-0.235998	0.45445	0.389781	0.21457	0.465814	0.269055
tr|F5H604|F5H604_HUMAN	CLASP2	F5H604_HUMAN CLIP-associating protein 2	53	6.25595	6.37337	6.32102	6.21641	6.4805	5.81701	6.33304	5.93214	6.5286	6.311	6.23026	6.0287	6.50177	6.21495	6.29072	6.16454	6.29169	0.99432	1.01298	1.00466	0.988035	1.03001	0.924555	1.00657	0.942854	1.03765	1.00307	0.990237	0.958201	1.03339	0.987803	0.999846	0.979791	-0.00821803	0.0186094	0.00671036	-0.0173654	0.0426581	-0.113169	0.00945118	-0.0848944	0.0533266	0.00442161	-0.0141546	-0.0616001	0.0473855
sp|O14964|HGS_HUMAN	HGS	HGS_HUMAN Hepatocyte growth factor-regulated tyrosine kinase substrate	45	6.50081	6.24469	6.09357	6.16746	6.59185	5.90123	6.27291	6.5052	6.29264	6.15422	6.5282	6.22346	6.19728	5.92799	6.21538	6.18311	6.25163	1.03986	0.998889	0.974717	0.986536	1.05442	0.94395	1.0034	1.04056	1.00656	0.984418	1.04424	0.995494	0.991306	0.948231	0.994201	0.989039	0.0563865	-0.00160302	-0.0369453	-0.0195565	0.0764504	-0.0832173	0.00490189	0.0573604	0.00943244	-0.022657	0.0624523	-0.00651609	-0.0125978
sp|P09496-2|CLCA_HUMAN	CLTA	CLCA_HUMAN Isoform Non-brain of Clathrin light chain A	24	6.25865	6.40172	6.39028	5.7726	5.2841	6.73651	6.18749	5.75569	6.5229	6.28238	6.19092	5.96185	6.80932	6.46056	6.57297	6.41205	6.20581	1.00851	1.03157	1.02972	0.930192	0.851476	1.08552	0.997048	0.927468	1.0511	1.01234	0.9976	0.960688	1.09725	1.04105	1.05916	1.03323	0.0122314	0.0448395	0.042259	-0.104399	-0.231962	0.118381	-0.00426582	-0.108631	0.0718934	0.0176911	-0.00346629	-0.05786	0.133891
sp|Q8NEC7|GSTCD_HUMAN	GSTCD	GSTCD_HUMAN Glutathione S-transferase C-terminal domain-containing protein	13	5.95299	6.08389	6.2039	6.20132	6.08166	5.97496	6.33276	6.63607	6.36454	6.50207	6.37378	6.53794	6.13208	6.86112	5.68597	6.07497	6.11052	0.974219	0.995641	1.01528	1.01486	0.995276	0.977815	1.03637	1.08601	1.04157	1.06408	1.04308	1.06995	1.00353	1.12284	0.930521	0.994181	-0.0376819	-0.00630227	0.0218791	0.021279	-0.00683117	-0.0323673	0.0515381	0.119033	0.0587599	0.0896028	0.0608529	0.0975398	0.00508018
sp|P20962|PTMS_HUMAN	PTMS	PTMS_HUMAN Parathymosin	24	6.4732	5.67349	6.36984	6.57546	6.04228	6.41298	6.47062	6.22331	5.52146	6.24717	6.96637	6.39486	6.30295	6.09389	6.23386	5.99826	6.273	1.03191	0.90443	1.01544	1.04822	0.963221	1.02232	1.0315	0.992079	0.880195	0.995883	1.11053	1.01943	1.00477	0.971448	0.993761	0.956203	0.0453241	-0.144919	0.0221021	0.0679368	-0.0540619	0.0318399	0.044749	-0.0114729	-0.184105	-0.0059522	0.151252	0.0277578	0.00687223
sp|Q13356|PPIL2_HUMAN	PPIL2	PPIL2_HUMAN Peptidyl-prolyl cis-trans isomerase-like 2	41	6.22611	6.19879	6.15515	6.31454	6.30357	5.57704	6.4394	6.10313	6.52748	6.55172	6.26744	6.2278	6.37749	6.2823	6.3068	6.14125	6.22365	1.0004	0.996006	0.988994	1.0146	1.01284	0.896105	1.03467	0.980636	1.04882	1.05271	1.00704	1.00067	1.02472	1.00942	1.01336	0.986761	0.000570716	-0.00577372	-0.0159663	0.0209173	0.0184088	-0.158261	0.0491659	-0.028211	0.0687658	0.0741134	0.0101159	0.000962264	0.0352284
sp|Q9UKK6|NXT1_HUMAN	NXT1	NXT1_HUMAN NTF2-related export protein 1	5	5.63008	6.55211	7.06476	6.23287	5.50353	5.80536	5.87116	5.97904	6.98373	5.47755	5.23635	6.22292	6.88285	7.167	6.87226	6.51843	6.36995	0.883849	1.0286	1.10908	0.978479	0.863983	0.911366	0.921696	0.938631	1.09635	0.859904	0.822039	0.976917	1.08052	1.12513	1.07886	1.02331	-0.178128	0.0406764	0.149357	-0.0313866	-0.210926	-0.133898	-0.117638	-0.0913693	0.132715	-0.217752	-0.282722	-0.0336915	0.111723
tr|F5H2F4|F5H2F4_HUMAN	MTHFD1	F5H2F4_HUMAN C-1-tetrahydrofolate synthase, cytoplasmic	88	6.32875	6.16401	6.17071	6.13825	6.5725	5.88526	6.44639	5.92376	6.45768	6.43085	6.42599	6.14727	6.37608	6.15246	6.2936	6.08645	6.20043	1.0207	0.994126	0.995207	0.989972	1.06001	0.94917	1.03967	0.955379	1.04149	1.03716	1.03638	0.991426	1.02833	0.992263	1.01503	0.981617	0.0295523	-0.00849907	-0.00693177	-0.0145409	0.084074	-0.0752621	0.0561232	-0.0658551	0.0586477	0.0526412	0.0515505	-0.0124224	0.0403015
sp|Q6UB35|C1TM_HUMAN	MTHFD1L	C1TM_HUMAN Monofunctional C1-tetrahydrofolate synthase, mitochondrial	55	6.39707	6.62237	6.27895	6.1701	6.51294	6.03889	6.50304	5.87011	6.26827	6.30639	6.25744	6.33694	6.2745	5.88146	6.19529	6.08622	6.36712	1.0047	1.04009	0.986152	0.969056	1.0229	0.948449	1.02135	0.921941	0.984475	0.990462	0.982774	0.99526	0.985453	0.923723	0.973013	0.955882	0.00676975	0.0567061	-0.0201182	-0.0453476	0.0326674	-0.0763581	0.0304728	-0.117254	-0.0225742	-0.0138271	-0.025069	-0.00685517	-0.021141
tr|Q5JYA5|Q5JYA5_HUMAN	MTHFD1L	Q5JYA5_HUMAN Monofunctional C1-tetrahydrofolate synthase, mitochondrial (Fragment)	3	6.22968	6.18593	5.42843	5.66737	6.52132	6.31772	6.6879	6.64397	6.43223	6.10285	6.70202	6.28405	6.29485	7.35051	5.64137	5.50981	5.87785	1.05986	1.05241	0.92354	0.964191	1.10947	1.07483	1.13781	1.13034	1.09432	1.03828	1.14022	1.06911	1.07094	1.25054	0.959767	0.937385	0.0838689	0.0737014	-0.114754	-0.0526098	0.149875	0.104115	0.186264	0.176756	0.13003	0.054194	0.189307	0.0964055	0.0988828
sp|Q8WUM4|PDC6I_HUMAN	PDCD6IP	PDC6I_HUMAN Programmed cell death 6-interacting protein	93	6.20477	6.38979	6.27473	6.14058	6.50765	5.54227	6.30294	5.98147	6.65006	6.38946	6.19517	5.90241	6.69024	6.24937	6.45212	6.12697	6.25247	0.992371	1.02196	1.00356	0.982105	1.04081	0.886413	1.00807	0.956658	1.06359	1.02191	0.990836	0.944013	1.07002	0.999505	1.03193	0.979928	-0.0110479	0.0313429	0.00512773	-0.0260507	0.057711	-0.173949	0.0115993	-0.0639256	0.0889417	0.0312684	-0.0132818	-0.0831215	0.0976323
sp|Q1KMD3|HNRL2_HUMAN	HNRNPUL2	HNRL2_HUMAN Heterogeneous nuclear ribonucleoprotein U-like protein 2	30	5.39111	6.43349	6.4635	5.53134	5.95968	6.40248	5.57529	6.887	6.81968	6.03557	5.8671	6.23028	6.11991	6.56465	6.66656	7.05235	5.95486	0.905329	1.08038	1.08542	0.928878	1.00081	1.07517	0.936259	1.15653	1.14523	1.01355	0.985262	1.04625	1.02772	1.1024	1.11952	1.1843	-0.143485	0.111534	0.118248	-0.106439	0.00116728	0.104563	-0.0950207	0.209808	0.195636	0.0194224	-0.02142	0.0652294	0.0394428
sp|Q8WUB8|PHF10_HUMAN	PHF10	PHF10_HUMAN PHD finger protein 10	4	6.09209	5.95886	6.28657	6.32756	5.9776	6.60626	5.74499	6.44049	6.8483	6.54151	6.26905	6.64537	5.72881	6.38117	5.81594	6.33543	6.16627	0.98797	0.966364	1.01951	1.02616	0.969403	1.07135	0.93168	1.04447	1.11061	1.06085	1.01667	1.0777	0.929056	1.03485	0.943186	1.02743	-0.0174608	-0.0493617	0.027875	0.0372512	-0.0448317	0.0994357	-0.102094	0.0627724	0.151348	0.0852256	0.0238488	0.107951	-0.106163
sp|Q9NVR2|INT10_HUMAN	INTS10	INT10_HUMAN Integrator complex subunit 10	18	6.25678	6.0219	6.24631	6.41518	6.5154	5.6929	6.15502	6.02181	6.19626	6.28107	6.57638	6.64236	6.04123	6.21217	6.22054	6.50467	6.23504	1.00349	0.965815	1.00181	1.02889	1.04496	0.913049	0.987166	0.965801	0.99378	1.00738	1.05475	1.06533	0.968916	0.996332	0.997674	1.04324	0.00502098	-0.0501806	0.00260478	0.0410904	0.0634544	-0.131236	-0.0186358	-0.0502022	-0.00900171	0.010611	0.0768943	0.0912965	-0.0455571
sp|Q9P253|VPS18_HUMAN	VPS18	VPS18_HUMAN Vacuolar protein sorting-associated protein 18 homolog	24	6.04585	6.35111	6.20774	6.08553	6.32652	5.74909	6.20587	6.20513	6.56518	6.37658	6.25749	6.3283	6.30868	6.54206	6.07707	6.3678	6.17256	0.979472	1.02893	1.0057	0.985901	1.02494	0.931395	1.0054	1.00528	1.06361	1.03305	1.01376	1.02523	1.02205	1.05986	0.98453	1.03163	-0.0299232	0.0411404	0.00819976	-0.0204855	0.0355438	-0.102535	0.0077651	0.00759306	0.0889662	0.0469145	0.0197157	0.0359496	0.0314698
sp|P40818|UBP8_HUMAN	USP8	UBP8_HUMAN Ubiquitin carboxyl-terminal hydrolase 8	37	5.98542	6.38642	6.50583	6.4741	6.36054	5.39888	6.28132	6.0657	6.61701	6.34714	6.28935	6.07625	6.49179	6.12158	6.38112	6.21754	6.33794	0.944379	1.00765	1.02649	1.02148	1.00357	0.851835	0.991066	0.957046	1.04403	1.00145	0.992333	0.95871	1.02427	0.965862	1.00681	0.981003	-0.0825621	0.0109929	0.0377186	0.0306651	0.00513468	-0.231354	-0.0129468	-0.0633404	0.0621649	0.00209209	-0.0111036	-0.0608333	0.0346018
sp|P42338|PK3CB_HUMAN	PIK3CB	PK3CB_HUMAN Phosphatidylinositol 4,5-bisphosphate 3-kinase catalytic subunit beta isoform	27	6.43717	6.37627	6.21903	6.43679	6.37231	5.81552	6.37231	5.74396	6.36371	6.44528	6.3784	6.40773	6.2967	6.22495	5.99301	6.11685	6.36731	1.01097	1.00141	0.976712	1.01091	1.00078	0.913339	1.00078	0.902101	0.999434	1.01224	1.00174	1.00635	0.98891	0.977641	0.941215	0.960664	0.0157414	0.00202758	-0.0339956	0.0156563	0.00113131	-0.130777	0.00113131	-0.148639	-0.000817046	0.0175579	0.00250944	0.00912822	-0.0160892
sp|O00329|PK3CD_HUMAN	PIK3CD	PK3CD_HUMAN Phosphatidylinositol 4,5-bisphosphate 3-kinase catalytic subunit delta isoform	6	5.91903	6.0926	6.16292	6.50723	6.22649	5.56058	5.91096	6.12073	6.58253	6.24542	6.87282	6.68207	6.42884	6.20669	6.4271	6.05398	6.17044	0.959255	0.987384	0.99878	1.05458	1.00908	0.901164	0.957947	0.991943	1.06678	1.01215	1.11383	1.08292	1.04188	1.00587	1.04159	0.981125	-0.0600138	-0.0183165	-0.00176047	0.076669	0.0130446	-0.150139	-0.0619821	-0.0116708	0.0932677	0.0174241	0.155528	0.114921	0.0591839
sp|Q92614|MY18A_HUMAN	MYO18A	MY18A_HUMAN Unconventional myosin-XVIIIa	51	5.71581	6.76831	6.721	4.98522	6.19391	5.14441	5.58601	5.35905	8.2085	5.87527	6.01505	5.72397	6.9397	6.70829	6.99619	7.05934	6.04758	0.945139	1.11918	1.11135	0.824332	1.0242	0.850655	0.923676	0.886147	1.35732	0.971507	0.99462	0.946489	1.14752	1.10925	1.15686	1.1673	-0.0814012	0.162437	0.152317	-0.278702	0.0344913	-0.233354	-0.114541	-0.174382	0.440759	-0.041704	-0.00778241	-0.079343	0.198514
sp|P49917|DNLI4_HUMAN	LIG4	DNLI4_HUMAN DNA ligase 4	12	5.97667	6.32333	6.27864	6.40988	6.40441	5.34456	6.42774	6.14571	6.25496	6.47796	6.7232	6.60908	6.37719	6.23053	6.1178	5.89834	6.24713	0.956707	1.0122	1.00504	1.02605	1.02518	0.855522	1.02891	0.983765	1.00125	1.03695	1.07621	1.05794	1.02082	0.997343	0.979298	0.944168	-0.0638517	0.017491	0.00725854	0.0371038	0.0358721	-0.225122	0.041118	-0.0236139	0.00180711	0.052346	0.105955	0.0812559	0.0297273
sp|Q9HCS7|SYF1_HUMAN	XAB2	SYF1_HUMAN Pre-mRNA-splicing factor SYF1	23	5.95708	6.11855	6.21469	5.97132	6.17643	5.39909	5.91019	7.35249	6.97512	6.16863	5.98186	5.89033	6.13271	6.46784	6.47319	6.81046	6.06541	0.98214	1.00876	1.02461	0.984487	1.0183	0.890144	0.974409	1.2122	1.14998	1.01702	0.986225	0.971135	1.0111	1.06635	1.06723	1.12284	-0.0259998	0.0125846	0.0350773	-0.0225553	0.026168	-0.167889	-0.0374007	0.277628	0.201613	0.0243449	-0.020011	-0.0422567	0.0159196
sp|Q9NVM6|DJC17_HUMAN	DNAJC17	DJC17_HUMAN DnaJ homolog subfamily C member 17	10	5.96126	6.38578	6.33185	6.88968	6.02593	5.7683	6.1484	6.35217	6.33162	6.27014	6.70736	6.72933	6.08881	5.84124	6.0017	6.16643	6.39214	0.932592	0.999005	0.990568	1.07784	0.942709	0.902405	0.961868	0.993747	0.990532	0.980914	1.04931	1.05275	0.952546	0.913816	0.938918	0.964689	-0.100682	-0.00143672	-0.0136725	0.108137	-0.0851157	-0.148153	-0.0560885	-0.00905005	-0.0137249	-0.0278019	0.0694455	0.0741633	-0.0701393
sp|Q9BZL4|PP12C_HUMAN	PPP1R12C	PP12C_HUMAN Protein phosphatase 1 regulatory subunit 12C	12	6.33116	6.05641	6.11396	6.30589	5.8923	5.85415	6.15696	7.22427	6.47058	6.34672	6.51757	6.19793	6.3041	5.97438	6.13849	6.11512	6.20186	1.02085	0.976548	0.985828	1.01677	0.950087	0.943935	0.992761	1.16486	1.04333	1.02336	1.05091	0.999367	1.01649	0.963321	0.989783	0.986015	0.0297701	-0.0342369	-0.0205927	0.0240002	-0.0738689	-0.0832401	-0.0104816	0.220152	0.0611952	0.0333114	0.0716344	-0.000913335	0.0235906
sp|Q9UHV9|PFD2_HUMAN	PFDN2	PFD2_HUMAN Prefoldin subunit 2	31	5.58623	6.03144	5.6934	7.37766	5.42107	7.63065	6.52919	7.38987	5.26419	6.42112	6.1753	7.07517	6.08625	5.9619	5.662	5.69456	6.17218	0.905066	0.977197	0.922429	1.19531	0.878307	1.2363	1.05784	1.19729	0.85289	1.04033	1.00051	1.1463	0.986077	0.965931	0.917342	0.922617	-0.143906	-0.0332782	-0.11649	0.257383	-0.187203	0.306025	0.0811233	0.259768	-0.229569	0.0570442	0.000728505	0.196984	-0.0202271
sp|Q9NR33|DPOE4_HUMAN	POLE4	DPOE4_HUMAN DNA polymerase epsilon subunit 4	6	4.08148	5.59164	6.29954	7.20476	2.72691	6.08577	7.09338	5.97679	6.21129	7.09259	5.51478	8.02439	5.64943	7.17518	7.69377	7.5783	5.79436	0.704389	0.965015	1.08719	1.24341	0.470615	1.05029	1.22419	1.03148	1.07196	1.22405	0.95175	1.38486	0.974989	1.23831	1.3278	1.30788	-0.505556	-0.0513766	0.120598	0.314302	-1.08738	0.0707917	0.291825	0.0447228	0.100245	0.291664	-0.0713447	0.469744	-0.0365428
sp|O94822-3|LTN1_HUMAN	LTN1	LTN1_HUMAN Isoform 3 of E3 ubiquitin-protein ligase listerin	55	6.20456	6.74788	6.32547	6.15871	6.36801	5.50168	6.1677	6.04605	6.49582	6.38033	6.23749	6.35091	6.40663	6.34929	6.13491	6.12457	6.35915	0.975689	1.06113	0.994703	0.968479	1.00139	0.865159	0.969893	0.950763	1.02149	1.00333	0.980868	0.998703	1.00747	0.998449	0.964737	0.963111	-0.0355062	0.0855992	-0.00766239	-0.0462069	0.00200753	-0.208963	-0.0441025	-0.0728422	0.0306766	0.00479597	-0.0278695	-0.00187175	0.0107306
sp|P05023|AT1A1_HUMAN	ATP1A1	AT1A1_HUMAN Sodium/potassium-transporting ATPase subunit alpha-1	110	6.43834	5.92311	5.99074	6.3996	6.21928	6.61024	6.48184	6.15449	5.73248	6.24197	6.57681	6.50357	6.25736	6.08389	6.21951	6.16676	6.18795	1.04046	0.957201	0.96813	1.0342	1.00506	1.06824	1.04749	0.994593	0.926394	1.00873	1.06284	1.05101	1.01122	0.983184	1.0051	0.996576	0.0572278	-0.0631061	-0.0467267	0.0485208	0.00728661	0.0952417	0.0669425	-0.00782165	-0.110302	0.0125405	0.087927	0.0717709	0.0160932
sp|Q9BUK6|MSTO1_HUMAN	MSTO1	MSTO1_HUMAN Protein misato homolog 1	15	6.32731	6.19942	6.49448	6.64475	6.49716	6.0689	6.44793	5.77788	6.25748	6.40775	6.27048	6.34075	6.41236	6.16096	6.02662	5.66577	6.41649	0.986101	0.96617	1.01215	1.03557	1.01257	0.945829	1.0049	0.900474	0.975219	0.998638	0.977245	0.988196	0.999356	0.960176	0.939239	0.883001	-0.020192	-0.0496511	0.0174297	0.0504306	0.0180249	-0.0803493	0.00705176	-0.151244	-0.0362025	-0.00196646	-0.0332084	-0.0171308	-0.000928896
sp|P55196-5|AFAD_HUMAN	MLLT4	AFAD_HUMAN Isoform 5 of Afadin	91	6.13419	6.15057	6.26893	6.34018	6.3839	5.83648	6.28515	5.99207	6.43436	6.43773	6.49189	6.43934	6.40108	5.97229	6.19223	6.23961	6.22347	0.985655	0.988287	1.00731	1.01875	1.02578	0.937818	1.00991	0.962819	1.03389	1.03443	1.04313	1.03469	1.02854	0.95964	0.994981	1.00259	-0.0208458	-0.0169985	0.0105006	0.0268052	0.0367194	-0.0926201	0.0142286	-0.0546641	0.048078	0.0488334	0.0609199	0.0491942	0.0405967
sp|P55196-1|AFAD_HUMAN	MLLT4	AFAD_HUMAN Isoform 2 of Afadin	3	7.09405	5.98118	6.82608	6.52241	6.75226	5.67706	6.09647	6.33069	6.1222	6.81756	6.25853	5.75299	6.0062	5.82473	6.07902	5.85856	6.60593	1.07389	0.905426	1.03333	0.987357	1.02215	0.859388	0.922878	0.958334	0.926773	1.03204	0.947411	0.870883	0.909213	0.881743	0.920237	0.886864	0.102848	-0.143332	0.0472956	-0.0183566	0.0316088	-0.218618	-0.115788	-0.0613989	-0.109712	0.0454938	-0.0779378	-0.19945	-0.137309
tr|E9PFY5|E9PFY5_HUMAN	MLLT4	E9PFY5_HUMAN Afadin (Fragment)	1	5.76188	5.03387	8.39742	10.6502	6.29249	3.10517	6.99756	6.44841	4.61455	4.64695	6.9009	6.36414	6.10406	5.97843	6.02836	6.67556	7.46084	0.772283	0.674705	1.12553	1.42748	0.843402	0.416196	0.937905	0.864301	0.618503	0.622845	0.924949	0.853006	0.818146	0.801308	0.808	0.894746	-0.372799	-0.567671	0.170608	0.51347	-0.245708	-1.26467	-0.0924866	-0.210395	-0.693149	-0.683054	-0.112554	-0.229373	-0.289569
sp|O43395|PRPF3_HUMAN	PRPF3	PRPF3_HUMAN U4/U6 small nuclear ribonucleoprotein Prp3	33	6.38974	6.6634	6.6328	6.30641	6.57507	6.16263	6.10442	6.44586	6.53561	6.05018	5.54739	5.82614	5.99586	6.10894	6.3256	6.32995	6.49809	0.983326	1.02544	1.02073	0.970502	1.01185	0.948376	0.939418	0.991963	1.00577	0.931071	0.853696	0.896593	0.922711	0.940114	0.973456	0.974125	-0.0242579	0.0362433	0.0296029	-0.0431962	0.0169911	-0.076469	-0.0901609	-0.0116423	0.00830673	-0.103037	-0.228206	-0.157475	-0.116048
sp|O75717|WDHD1_HUMAN	WDHD1	WDHD1_HUMAN WD repeat and HMG-box DNA-binding protein 1	56	6.23839	6.21469	6.09159	6.34087	6.34178	5.61501	6.49708	5.85448	6.47162	6.69066	6.50703	6.42547	6.39519	5.98654	6.21754	6.11206	6.22138	1.00273	0.998924	0.979137	1.01921	1.01935	0.902534	1.04431	0.941025	1.04022	1.07543	1.04591	1.0328	1.02794	0.962252	0.999382	0.982428	0.00393796	-0.00155336	-0.0304169	0.027445	0.027652	-0.147947	0.0625557	-0.0876948	0.0568911	0.104913	0.0647634	0.0465662	0.0397514
sp|Q96I15|SCLY_HUMAN	SCLY	SCLY_HUMAN Selenocysteine lyase	16	6.35435	6.10675	6.16962	6.51959	6.3142	6.21751	6.65203	5.3492	5.99076	6.30176	6.72655	6.49169	6.22036	5.93469	6.53355	6.1174	6.28758	1.01062	0.971241	0.98124	1.0369	1.00423	0.988856	1.05796	0.850757	0.952793	1.00226	1.06982	1.03246	0.989309	0.943875	1.03912	0.972934	0.0152403	-0.0420995	-0.0273226	0.052277	0.00609568	-0.0161674	0.0812904	-0.233181	-0.0697652	0.00325053	0.0973625	0.0460898	-0.0155062
sp|Q15583|TGIF1_HUMAN	TGIF1	TGIF1_HUMAN Homeobox protein TGIF1	2	6.36021	6.1004	5.8938	6.52598	6.28733	5.56243	6.30676	7.62016	6.36024	5.85156	5.99169	6.74935	6.7198	5.54183	6.09665	6.03181	6.2201	1.02253	0.980756	0.947541	1.04918	1.01081	0.894267	1.01393	1.22509	1.02253	0.940751	0.963279	1.08509	1.08034	0.890955	0.980153	0.969729	0.0321372	-0.0280334	-0.0777391	0.0692574	0.0155103	-0.161222	0.0199618	0.292884	0.032144	-0.0881159	-0.0539742	0.117811	0.111481
sp|P78318|IGBP1_HUMAN	IGBP1	IGBP1_HUMAN Immunoglobulin-binding protein 1	15	6.45533	6.07736	6.09303	6.58954	6.53104	6.05868	6.11451	6.09334	5.98706	6.34913	6.70967	6.41638	6.33766	5.79587	6.29014	6.10125	6.30381	1.02404	0.964077	0.966562	1.04533	1.03605	0.961113	0.96997	0.966611	0.949752	1.00719	1.06438	1.01786	1.00537	0.919423	0.997831	0.967866	0.0342657	-0.0527804	-0.0490654	0.0639526	0.0510875	-0.0572217	-0.0439883	-0.048992	-0.0743775	0.0103337	0.0900166	0.0255344	0.00772507
sp|P33176|KINH_HUMAN	KIF5B	KINH_HUMAN Kinesin-1 heavy chain	64	6.54132	6.2502	6.12871	6.20747	6.66034	6.16	6.30837	5.92869	6.20535	6.20617	6.44554	6.2372	6.34274	6.00535	6.23238	6.14018	6.28193	1.04129	0.99495	0.97561	0.988148	1.06024	0.980591	1.00421	0.94377	0.98781	0.987941	1.02605	0.99288	1.00968	0.955973	0.992113	0.977436	0.0583751	-0.00730436	-0.0356233	-0.0172013	0.0843891	-0.0282764	0.00606056	-0.0834934	-0.0176941	-0.0175035	0.0370945	-0.0103082	0.0138995
sp|Q12840|KIF5A_HUMAN	KIF5A	KIF5A_HUMAN Kinesin heavy chain isoform 5A	29	6.38719	6.19703	6.22888	6.19148	6.30871	6.33815	6.27135	6.14768	6.36938	6.2725	6.63831	6.34676	6.13087	6.01265	6.25926	5.89979	6.25114	1.02176	0.991343	0.996438	0.990455	1.00921	1.01392	1.00323	0.983449	1.01891	1.00342	1.06194	1.0153	0.98076	0.961848	1.0013	0.943793	0.0310609	-0.0125435	-0.00514769	-0.0138362	0.0132246	0.0199413	0.00465557	-0.0240784	0.0270325	0.0049201	0.0866955	0.0218998	-0.0280287
sp|Q96CW6|S7A6O_HUMAN	SLC7A6OS	S7A6O_HUMAN Probable RNA polymerase II nuclear localization protein SLC7A6OS	6	6.76849	5.77974	6.23815	6.55268	6.30926	6.24272	6.3427	5.70013	5.97621	6.38252	6.43727	6.46687	6.20221	5.96213	6.30023	6.3387	6.33476	1.06847	0.912384	0.984748	1.0344	0.995974	0.98547	1.00125	0.899817	0.943399	1.00754	1.01618	1.02085	0.979075	0.941176	0.994548	1.00062	0.0955429	-0.132287	-0.0221729	0.048794	-0.0058203	-0.0211163	0.00180601	-0.152296	-0.0840603	0.0108351	0.0231579	0.0297765	-0.0305087
sp|O60524|NEMF_HUMAN	NEMF	NEMF_HUMAN Nuclear export mediator factor NEMF	38	6.04888	6.44274	6.84253	5.54326	6.79977	6.22439	5.30689	6.8306	7.18408	6.12963	5.34557	5.5983	6.1881	6.91376	6.48296	6.11854	6.21935	0.97259	1.03592	1.1002	0.891292	1.09332	1.00081	0.853287	1.09828	1.15512	0.985574	0.859506	0.900142	0.994975	1.11165	1.04239	0.983791	-0.0400963	0.05091	0.137765	-0.16603	0.128722	0.00116807	-0.228898	0.135248	0.208039	-0.0209644	-0.218421	-0.151776	-0.00726788
sp|Q8IXQ3|CI040_HUMAN	C9orf40	CI040_HUMAN Uncharacterized protein C9orf40	9	4.77574	5.82743	6.63761	6.99725	4.95478	6.47351	6.71045	5.16053	5.71532	6.77719	6.63701	7.15717	6.23615	6.45992	6.69635	6.78358	6.05951	0.78814	0.9617	1.0954	1.15476	0.817687	1.06832	1.10742	0.851642	0.943199	1.11844	1.09531	1.18115	1.02915	1.06608	1.1051	1.11949	-0.343476	-0.0563408	0.131463	0.207587	-0.29038	0.0953476	0.147209	-0.231681	-0.0843663	0.161487	0.131333	0.240189	0.0414551
sp|Q16877|F264_HUMAN	PFKFB4	F264_HUMAN 6-phosphofructo-2-kinase/fructose-2,6-bisphosphatase 4	14	6.33608	6.00288	6.09893	6.44666	6.27855	5.99264	6.34218	5.61009	5.94201	6.24166	6.87053	6.57565	6.33664	6.37441	6.22595	6.32512	6.22114	1.01848	0.964917	0.980356	1.03625	1.00923	0.963271	1.01946	0.901779	0.955132	1.0033	1.10438	1.05699	1.01857	1.02464	1.00077	1.01671	0.0264122	-0.0515236	-0.0286222	0.0513735	0.013253	-0.0539867	0.0278004	-0.149154	-0.0662274	0.00475138	0.143243	0.0799551	0.0265397
sp|O60825|F262_HUMAN	PFKFB2	F262_HUMAN 6-phosphofructo-2-kinase/fructose-2,6-bisphosphatase 2	28	6.48533	6.20923	6.12751	6.25065	6.22546	6.23441	6.26315	6.14071	6.10964	6.18619	6.87919	6.56976	6.06871	6.11587	6.12767	6.00652	6.26818	1.03464	0.990595	0.977558	0.997203	0.993185	0.994612	0.999198	0.979664	0.974707	0.98692	1.09748	1.04811	0.968177	0.975701	0.977584	0.958256	0.0491334	-0.0136322	-0.0327457	-0.00404039	-0.00986617	-0.00779357	-0.00115818	-0.0296411	-0.0369592	-0.0189955	0.134192	0.0677941	-0.0466567
sp|Q16875|F263_HUMAN	PFKFB3	F263_HUMAN 6-phosphofructo-2-kinase/fructose-2,6-bisphosphatase 3	20	6.58016	6.24876	6.05676	6.44303	6.17842	6.51456	6.408	6.11263	5.8984	6.25736	6.62702	6.47319	6.06571	5.97278	6.02438	6.13884	6.33218	1.03916	0.986826	0.956505	1.01751	0.975718	1.0288	1.01197	0.965328	0.931496	0.988185	1.04656	1.02227	0.957919	0.943243	0.951392	0.969467	0.055421	-0.0191318	-0.0641555	0.0250376	-0.0354638	0.040966	0.0171725	-0.0509085	-0.102378	-0.0171476	0.0656586	0.0317752	-0.0620252
sp|P49327|FAS_HUMAN	FASN	FAS_HUMAN Fatty acid synthase	382	6.4166	6.21468	6.22862	6.34287	6.65045	6.00755	6.46434	5.98205	6.1929	6.16324	6.46431	6.13035	6.38555	6.0992	6.17065	6.08664	6.30069	1.0184	0.986349	0.988561	1.00669	1.05551	0.953475	1.02597	0.949427	0.982892	0.978185	1.02597	0.972964	1.01347	0.968021	0.979361	0.966027	0.0262986	-0.0198303	-0.0165978	0.00962537	0.0779416	-0.0687337	0.0369927	-0.0748704	-0.0248953	-0.0318214	0.036986	-0.039541	0.0193005
sp|Q9NS91|RAD18_HUMAN	RAD18	RAD18_HUMAN E3 ubiquitin-protein ligase RAD18	19	6.28224	6.28071	6.18872	6.33869	6.10746	5.35177	6.48397	6.57628	6.08861	6.56897	6.36195	6.41166	6.12136	6.11623	6.2966	6.42477	6.27259	1.00154	1.00129	0.986629	1.01054	0.973674	0.853199	1.0337	1.04842	0.970669	1.04725	1.01425	1.02217	0.97589	0.975072	1.00383	1.02426	0.00221779	0.00186639	-0.0194202	0.0151234	-0.0384888	-0.229045	0.0478162	0.0682105	-0.0429484	0.0666059	0.0204078	0.0316367	-0.035209
sp|P35606|COPB2_HUMAN	COPB2	COPB2_HUMAN Coatomer subunit beta'	84	6.52471	6.2007	6.11166	6.16371	6.50398	6.13692	6.30188	5.95258	6.34918	6.2515	6.53069	6.25234	6.31809	6.20535	6.08997	6.10676	6.25019	1.04392	0.992081	0.977835	0.986163	1.0406	0.981877	1.00827	0.952383	1.01584	1.00021	1.04488	1.00034	1.01086	0.992825	0.974365	0.977051	0.0620126	-0.0114701	-0.0323369	-0.0201022	0.0574216	-0.0263864	0.0118811	-0.0703861	0.0226691	0.000301194	0.0633342	0.000495033	0.0155873
sp|P53985|MOT1_HUMAN	SLC16A1	MOT1_HUMAN Monocarboxylate transporter 1	20	6.45893	5.85097	5.9327	6.74456	6.36496	6.62596	6.78678	6.65093	5.19012	6.22096	6.25548	6.65047	6.24864	6.28682	5.83816	5.89357	6.24679	1.03396	0.936636	0.94972	1.07968	1.01892	1.0607	1.08644	1.0647	0.830846	0.995865	1.00139	1.06462	1.0003	1.00641	0.934586	0.943456	0.0481802	-0.0944392	-0.0744262	0.110609	0.0270364	0.0850145	0.119612	0.0904411	-0.267347	-0.0059778	0.00200556	0.0903413	0.000427194
sp|Q709C8|VP13C_HUMAN	VPS13C	VP13C_HUMAN Vacuolar protein sorting-associated protein 13C	80	6.43707	6.2606	6.06725	6.33953	6.33475	6.37037	6.30739	6.26361	6.11802	6.29642	6.5416	6.43631	6.17012	6.09874	5.84905	6.10917	6.27611	1.02565	0.997528	0.966721	1.0101	1.00934	1.01502	1.00498	0.998008	0.97481	1.00324	1.0423	1.02552	0.983112	0.971738	0.931954	0.9734	0.0365329	-0.00357028	-0.0488285	0.0145047	0.0134165	0.021506	0.00717193	-0.00287683	-0.0368064	0.00466057	0.0597723	0.0363626	-0.0245727
sp|Q96RL7|VP13A_HUMAN	VPS13A	VP13A_HUMAN Vacuolar protein sorting-associated protein 13A	40	6.49517	6.08478	5.78397	6.09497	6.09848	6.67329	6.30827	6.27794	6.10116	6.37796	6.6737	6.88286	5.88911	6.17067	5.8441	6.24358	6.11472	1.06222	0.995103	0.945909	0.99677	0.997344	1.09135	1.03165	1.02669	0.997782	1.04305	1.09142	1.12562	0.963103	1.00915	0.955742	1.02107	0.0870803	-0.00708193	-0.080227	-0.00466791	-0.00383732	0.126111	0.0449574	0.0380042	-0.00320346	0.060808	0.1262	0.170721	-0.0542374
sp|Q9BY42|RTF2_HUMAN	RTFDC1	RTF2_HUMAN Protein RTF2 homolog	6	6.22258	6.19528	6.02649	7.29109	6.27195	6.07428	6.26134	6.28826	5.65566	6.50409	5.79349	7.04193	5.79812	6.40443	5.82457	6.34645	6.43386	0.967161	0.962918	0.936683	1.13324	0.974835	0.944111	0.973186	0.97737	0.879046	1.01092	0.900469	1.09451	0.901188	0.995426	0.905299	0.986414	-0.0481717	-0.0545151	-0.0943666	0.18045	-0.0367705	-0.0829711	-0.0392131	-0.0330237	-0.185989	0.0156627	-0.151252	0.130286	-0.150099
tr|A2A2L6|A2A2L6_HUMAN	RTFDC1	A2A2L6_HUMAN Protein RTF2 homolog	1	7.06165	6.27644	6.47926	6.64753	7.5178	6.67541	5.81907	5.35418	5.93632	6.39354	5.96743	6.07635	6.30054	6.49411	5.30543	5.69494	6.61622	1.06732	0.948644	0.979299	1.00473	1.13627	1.00895	0.879516	0.809251	0.897237	0.966343	0.901939	0.918402	0.952287	0.981544	0.801882	0.860754	0.0939981	-0.0760607	-0.0301782	0.00681118	0.184303	0.0128492	-0.185219	-0.305342	-0.156438	-0.0493923	-0.148897	-0.122802	-0.0705317
sp|Q5HYK3|COQ5_HUMAN	COQ5	COQ5_HUMAN 2-methoxy-6-polyprenyl-1,4-benzoquinol methylase, mitochondrial	8	6.52318	6.06861	6.39134	6.44642	6.24471	6.89253	6.75423	6.58642	5.50923	6.13311	6.59175	6.52041	6.21773	5.85915	5.66222	5.59897	6.35739	1.02608	0.954576	1.00534	1.014	0.982276	1.08418	1.06242	1.03603	0.866587	0.964722	1.03686	1.02564	0.978032	0.921629	0.890652	0.880703	0.0371414	-0.0670679	0.00768441	0.0200642	-0.0257995	0.1166	0.0873573	0.0510605	-0.206583	-0.0518152	0.0522275	0.0365287	-0.0320461
sp|Q9GZS1-2|RPA49_HUMAN	POLR1E	RPA49_HUMAN Isoform 2 of DNA-directed RNA polymerase I subunit RPA49	15	5.72548	7.00452	7.56282	5.30542	6.50083	5.52943	4.99402	6.59419	7.80222	5.86321	4.7747	5.51265	6.12658	7.2516	6.52989	6.92243	6.39956	0.894668	1.09453	1.18177	0.829029	1.01582	0.864033	0.780369	1.03041	1.21918	0.91619	0.746098	0.861411	0.957344	1.13314	1.02037	1.0817	-0.160576	0.130313	0.240952	-0.270506	0.0226512	-0.210842	-0.357771	0.0432227	0.285912	-0.126282	-0.422563	-0.215227	-0.0628908
sp|P56192|SYMC_HUMAN	MARS	SYMC_HUMAN Methionine--tRNA ligase, cytoplasmic	83	5.97249	6.46508	6.69066	5.582	6.59255	6.0486	5.60219	5.61675	7.47575	6.21671	5.67356	5.81216	6.36414	6.89757	6.66809	6.3217	6.17756	0.966804	1.04654	1.08306	0.903593	1.06718	0.979125	0.906862	0.909219	1.21015	1.00634	0.918415	0.940851	1.0302	1.11655	1.07941	1.02333	-0.048704	0.0656317	0.115112	-0.146254	0.0938001	-0.0304353	-0.141046	-0.137301	0.275182	0.00911475	-0.122782	-0.0879621	0.042929
sp|Q9Y5A7|NUB1_HUMAN	NUB1	NUB1_HUMAN NEDD8 ultimate buster 1	22	6.14111	6.36529	6.38665	6.34499	6.42927	5.58633	6.09792	6.10247	6.63919	6.35872	6.44879	6.27751	6.28628	6.21354	6.23661	6.08532	6.30951	0.97331	1.00884	1.01223	1.00562	1.01898	0.885383	0.966465	0.967186	1.05225	1.0078	1.02207	0.994928	0.996318	0.98479	0.988446	0.964468	-0.0390285	0.0126983	0.0175314	0.00808992	0.027127	-0.175627	-0.0492107	-0.0481347	0.0734793	0.0112084	0.0315005	-0.00733555	-0.00532144
tr|G3V262|G3V262_HUMAN	ADCY4	G3V262_HUMAN Adenylate cyclase type 4	2	6.35567	5.60139	5.59876	6.66246	5.7602	7.55346	6.1213	6.63162	5.87765	6.05442	5.67523	6.63283	5.97612	7.61433	5.46437	6.42021	6.05457	1.04973	0.925151	0.924716	1.1004	0.951381	1.24756	1.01102	1.09531	0.970779	0.999975	0.937347	1.09551	0.987043	1.25762	0.90252	1.06039	0.0700197	-0.11224	-0.112917	0.13803	-0.0719056	0.319113	0.0158136	0.131337	-0.042785	-3.57427e-05	-0.0933456	0.1316	-0.0188154
sp|Q8N3D4|EH1L1_HUMAN	EHBP1L1	EH1L1_HUMAN EH domain-binding protein 1-like protein 1	41	6.24816	6.48445	6.42284	6.51825	6.18385	5.57052	6.3714	6.05776	6.3231	6.44557	6.27945	6.32962	6.20567	6.31825	6.175	6.06609	6.41843	0.973472	1.01029	1.00069	1.01555	0.963453	0.867895	0.992673	0.943808	0.985148	1.00423	0.978347	0.986164	0.966852	0.984393	0.962074	0.945106	-0.0387879	0.0147649	0.000992036	0.0222654	-0.053714	-0.204407	-0.0106089	-0.0834349	-0.0215873	0.00608862	-0.0315811	-0.0201004	-0.0486323
sp|Q8NDI1-2|EHBP1_HUMAN	EHBP1	EHBP1_HUMAN Isoform 2 of EH domain-binding protein 1	16	6.12629	6.16229	6.34388	6.22039	6.20708	5.78368	6.25723	6.13611	6.83312	6.42893	6.26165	6.15793	6.2219	6.25526	6.34468	6.25956	6.21321	0.98601	0.991804	1.02103	1.00116	0.999013	0.930868	1.00708	0.987591	1.09977	1.03472	1.0078	0.991102	1.0014	1.00677	1.02116	1.00746	-0.0203257	-0.0118728	0.0300261	0.00166564	-0.00142466	-0.103352	0.0101847	-0.0180151	0.137205	0.0492392	0.0112035	-0.0128939	0.00201581
sp|Q9UIF9|BAZ2A_HUMAN	BAZ2A	BAZ2A_HUMAN Bromodomain adjacent to zinc finger domain protein 2A	10	5.78196	7.56995	7.85534	5.78044	5.65008	5.66827	5.10841	6.25111	8.24597	5.44872	4.5445	5.00124	6.17713	6.41084	6.90338	7.60264	6.74692	0.856977	1.12199	1.16428	0.856752	0.837431	0.840127	0.757147	0.926513	1.22218	0.807586	0.673566	0.741262	0.915548	0.950187	1.02319	1.12683	-0.222671	0.166054	0.219444	-0.22305	-0.255958	-0.251321	-0.401355	-0.110117	0.28946	-0.308312	-0.570108	-0.431944	-0.127293
sp|P52272|HNRPM_HUMAN	HNRNPM	HNRPM_HUMAN Heterogeneous nuclear ribonucleoprotein M	116	5.39465	6.68893	7.02	5.04956	6.75494	5.66158	4.81656	6.67588	8.16289	6.29176	4.68479	5.32351	6.40745	7.47749	6.83607	6.75393	6.03829	0.893408	1.10775	1.16258	0.836257	1.11869	0.937614	0.79767	1.10559	1.35186	1.04198	0.775848	0.881626	1.06114	1.23835	1.13212	1.11852	-0.162609	0.147637	0.217332	-0.257981	0.161804	-0.0929341	-0.326136	0.144819	0.434941	0.0593248	-0.366154	-0.181761	0.0856115
tr|M0R019|M0R019_HUMAN	HNRNPM	M0R019_HUMAN Heterogeneous nuclear ribonucleoprotein M (Fragment)	1	5.63559	5.15884	4.58505	6.24631	6.16179	4.71986	6.49633	6.98178	6.70629	7.77579	7.63344	7.29936	6.68833	6.64314	5.92489	5.3432	5.40645	1.04238	0.954201	0.848071	1.15534	1.13971	0.873006	1.20159	1.29138	1.24042	1.43824	1.41191	1.35012	1.2371	1.22874	1.09589	0.988301	0.0598857	-0.0676342	-0.237743	0.208323	0.188669	-0.195937	0.264944	0.368914	0.310834	0.524308	0.497652	0.433089	0.306965
tr|M0QZM1|M0QZM1_HUMAN	HNRNPM	M0QZM1_HUMAN Heterogeneous nuclear ribonucleoprotein M (Fragment)	1	5.57058	6.72191	6.72916	4.69111	7.21243	6.01412	4.55705	6.79186	8.27861	5.98013	4.84188	5.60826	6.13376	7.4034	6.83978	6.62594	5.92819	0.939676	1.13389	1.13511	0.791322	1.21663	1.0145	0.768708	1.14569	1.39648	1.00876	0.816755	0.946032	1.03468	1.24885	1.15377	1.1177	-0.0897641	0.18128	0.182835	-0.337662	0.282894	0.020762	-0.379491	0.196215	0.481797	0.0125852	-0.292024	-0.0800385	0.04918
sp|Q8IXK2|GLT12_HUMAN	GALNT12	GLT12_HUMAN Polypeptide N-acetylgalactosaminyltransferase 12	6	6.0396	5.83864	6.39403	6.50087	6.43778	6.06829	6.54661	6.42073	6.05333	5.89788	6.40312	6.58676	6.22614	6.61122	5.91732	6.05769	6.19328	0.975185	0.942737	1.03241	1.04966	1.03948	0.979818	1.05705	1.03672	0.977402	0.952302	1.03388	1.06353	1.0053	1.06748	0.955441	0.978106	-0.0362518	-0.0850725	0.0460207	0.069928	0.0558584	-0.0294148	0.0800432	0.0520325	-0.0329758	-0.0705084	0.0480702	0.0888641	0.00763318
sp|Q8N4A0|GALT4_HUMAN	GALNT4	GALT4_HUMAN Polypeptide N-acetylgalactosaminyltransferase 4	7	6.4782	6.22086	5.76398	6.28823	6.50123	6.22267	6.47224	6.2676	6.06096	6.24743	6.51408	6.351	6.2539	6.30985	6.1119	5.93587	6.18782	1.04693	1.00534	0.931505	1.01623	1.05065	1.00563	1.04596	1.01289	0.979499	1.00963	1.05273	1.02637	1.01068	1.01972	0.987731	0.959283	0.0661624	0.00768339	-0.102365	0.0232233	0.071282	0.00810309	0.0648345	0.0184825	-0.0298843	0.0138322	0.0741308	0.0375531	0.0153255
sp|Q10471|GALT2_HUMAN	GALNT2	GALT2_HUMAN Polypeptide N-acetylgalactosaminyltransferase 2	42	6.52769	6.2379	5.85949	6.13058	6.47088	6.04861	6.31052	6.11711	6.40428	6.21885	6.59119	6.54511	6.20917	6.18112	6.08856	6.05895	6.18891	1.05474	1.00791	0.946772	0.990574	1.04556	0.97733	1.01965	0.988398	1.0348	1.00484	1.065	1.05755	1.00327	0.99874	0.983785	0.979	0.076886	0.0113739	-0.0789114	-0.0136629	0.0642754	-0.0330829	0.0280724	-0.0168363	0.0493499	0.00696131	0.0908525	0.0807309	0.00471392
sp|Q9NVZ3|NECP2_HUMAN	NECAP2	NECP2_HUMAN Adaptin ear-binding coat-associated protein 2	18	6.64463	6.04113	6.23858	6.32314	6.33018	6.24115	6.43537	5.74987	5.75447	6.04403	6.77068	6.48093	6.19317	6.39592	6.24761	6.10913	6.31187	1.05272	0.957106	0.988389	1.00179	1.0029	0.988796	1.01957	0.910961	0.91169	0.957566	1.07269	1.02678	0.981194	1.01332	0.989819	0.96788	0.0741214	-0.0632491	-0.0168498	0.00257367	0.00417903	-0.0162556	0.0279556	-0.134538	-0.133384	-0.0625567	0.101233	0.0381334	-0.0273894
sp|P15882|CHIN_HUMAN	CHN1	CHIN_HUMAN N-chimaerin	1	6.63075	5.98909	5.99397	5.19151	6.74427	5.44239	6.345	6.14639	7.66841	6.59339	7.4597	5.97033	5.68991	6.59391	5.84928	5.69168	5.95133	1.11416	1.00634	1.00716	0.872328	1.13324	0.914483	1.06615	1.03278	1.28852	1.10789	1.25345	1.00319	0.956074	1.10797	0.982853	0.956371	0.15596	0.0091247	0.0102997	-0.197058	0.18045	-0.128972	0.092408	0.0465272	0.365715	0.147808	0.325905	0.00459856	-0.0648063
tr|F2Z2U4|F2Z2U4_HUMAN	TRRAP	F2Z2U4_HUMAN Transformation/transcription domain-associated protein	85	6.40425	6.28223	6.5416	6.10854	6.32456	6.65265	5.91385	6.43577	6.22868	5.96147	5.85341	6.16076	5.99357	6.61656	6.10096	6.42113	6.33415	1.01107	0.991802	1.03275	0.964381	0.998485	1.05028	0.933645	1.01604	0.983348	0.941163	0.924103	0.972625	0.94623	1.04458	0.963185	1.01373	0.0158775	-0.0118754	0.0464914	-0.0523246	-0.00218706	0.070777	-0.0990545	0.0229606	-0.0242257	-0.0874841	-0.113875	-0.0400438	-0.0797366
sp|P31483|TIA1_HUMAN	TIA1	TIA1_HUMAN Nucleolysin TIA-1 isoform p40	14	6.39986	5.65256	6.54632	6.59523	6.1751	6.38424	6.57937	5.71402	5.73984	6.29103	6.77743	6.42448	6.327	6.19988	5.93418	6.25947	6.29849	1.01609	0.897446	1.03935	1.04711	0.980409	1.01361	1.04459	0.907204	0.911304	0.998815	1.07604	1.02	1.00453	0.984343	0.942159	0.993804	0.0230338	-0.156102	0.0556776	0.0664164	-0.0285441	0.0195083	0.0629429	-0.1405	-0.133996	-0.00171033	0.105732	0.0285731	0.00651502
sp|Q01085-2|TIAR_HUMAN	TIAL1	TIAR_HUMAN Isoform 2 of Nucleolysin TIAR	24	6.52821	6.14172	6.15148	6.31092	6.44288	6.3386	6.18956	6.3022	6.28453	6.42128	6.42226	6.5486	5.91417	5.85345	6.11079	6.03935	6.28308	1.03901	0.977501	0.979054	1.00443	1.02543	1.00884	0.985115	1.00304	1.00023	1.022	1.02215	1.04226	0.941285	0.931621	0.972578	0.961208	0.0552149	-0.0328298	-0.030539	0.00637781	0.0362332	0.0126917	-0.0216357	0.00438302	0.000332331	0.0313884	0.0316085	0.059714	-0.0872968
sp|P62258|1433E_HUMAN	YWHAE	1433E_HUMAN 14-3-3 protein epsilon	200	6.63794	5.97736	5.87777	6.09711	6.22937	6.5526	6.40243	6.37333	5.72704	6.21834	6.76298	6.45259	6.22806	6.08293	6.24323	6.13694	6.14755	1.07977	0.972317	0.956117	0.991796	1.01331	1.06589	1.04146	1.03673	0.931598	1.01152	1.10011	1.04962	1.0131	0.989489	1.01556	0.998275	0.110725	-0.040502	-0.0647415	-0.0118848	0.0190759	0.0920571	0.0586092	0.052037	-0.102221	0.0165191	0.137649	0.069868	0.0187725
sp|P61981|1433G_HUMAN	YWHAG	1433G_HUMAN 14-3-3 protein gamma	44	6.38719	6.04	5.3351	6.20374	6.3631	7.25217	6.21268	7.03656	5.87214	6.28325	6.40111	6.25745	6.25152	6.13543	6.00638	5.96217	5.99151	1.06604	1.00809	0.890444	1.03542	1.06202	1.21041	1.03691	1.17442	0.980077	1.04869	1.06836	1.04439	1.0434	1.02402	1.00248	0.995103	0.0922623	0.0116295	-0.167404	0.0502192	0.0868108	0.275494	0.0522967	0.231951	-0.0290327	0.0685919	0.0954031	0.0626558	0.061288
sp|Q04917|1433F_HUMAN	YWHAH	1433F_HUMAN 14-3-3 protein eta	24	6.65759	6.02318	5.73627	6.00977	6.37623	6.59063	6.2499	6.28769	6.06506	6.25026	6.56638	6.43411	6.24141	6.09917	6.34205	6.07029	6.1067	1.09021	0.986323	0.93934	0.984127	1.04414	1.07925	1.02345	1.02964	0.993181	1.02351	1.07527	1.05361	1.02206	0.998767	1.03854	0.994037	0.124606	-0.0198682	-0.0902806	-0.0230838	0.0623101	0.110023	0.0334395	0.0421365	-0.00987165	0.0335226	0.104705	0.075347	0.0314784
sp|P27348|1433T_HUMAN	YWHAQ	1433T_HUMAN 14-3-3 protein theta	32	6.34014	5.9834	6.10571	6.6865	6.60238	6.64496	6.4277	5.6208	6.09318	5.94855	6.7517	6.0858	6.24255	5.80362	6.44856	6.21445	6.27894	1.00975	0.952932	0.972411	1.06491	1.05151	1.05829	1.02369	0.895183	0.970416	0.947382	1.07529	0.96924	0.994205	0.9243	1.02701	0.98973	0.0139942	-0.0695549	-0.0403614	0.0907308	0.0724657	0.0817401	0.0337821	-0.159745	-0.0433251	-0.0779824	0.10473	-0.0450735	-0.00838498
sp|P31946|1433B_HUMAN	YWHAB	1433B_HUMAN 14-3-3 protein beta/alpha	32	6.58454	5.84213	6.01165	6.19717	6.39123	6.09913	6.44475	6.93978	5.92048	5.9933	6.56771	6.42008	6.36331	5.91755	6.14864	6.15856	6.15887	1.06911	0.948571	0.976096	1.00622	1.03773	0.9903	1.04642	1.12679	0.961293	0.973116	1.06638	1.04241	1.03319	0.960817	0.998339	0.999949	0.0964164	-0.0761718	-0.0349052	0.00894328	0.0534273	-0.0140628	0.0654581	0.172224	-0.0569521	-0.0393157	0.0927242	0.059925	0.0471111
sp|P63104|1433Z_HUMAN	YWHAZ	1433Z_HUMAN 14-3-3 protein zeta/delta	87	6.44771	6.00111	5.88053	6.73267	6.47597	6.85063	6.50974	5.9729	5.64209	5.93054	6.52115	6.15393	6.34574	6.12383	6.29419	6.11726	6.2655	1.02908	0.957801	0.938556	1.07456	1.03359	1.09339	1.03898	0.953299	0.9005	0.946538	1.0408	0.982192	1.01281	0.977388	1.00458	0.976339	0.0413561	-0.0622014	-0.0914846	0.103748	0.0476655	0.128806	0.0551691	-0.0689992	-0.151201	-0.0792673	0.0576956	-0.0259228	0.0183576
sp|P31947|1433S_HUMAN	SFN	1433S_HUMAN 14-3-3 protein sigma	23	6.05775	6.18153	5.6946	6.10639	5.92588	5.89496	6.14935	9.5206	5.38131	5.74556	6.62664	6.30198	5.96621	6.04704	5.95608	6.44413	6.01007	1.00793	1.02853	0.94751	1.01603	0.985992	0.980848	1.02317	1.58411	0.895383	0.955989	1.10259	1.04857	0.992703	1.00615	0.991017	1.07222	0.0114008	0.0405828	-0.0777867	0.0229385	-0.0203518	-0.0278992	0.0330527	0.663671	-0.159424	-0.0649337	0.140896	0.068424	-0.0105664
sp|Q13439|GOGA4_HUMAN	GOLGA4	GOGA4_HUMAN Golgin subfamily A member 4	79	6.01941	6.51273	6.38631	6.28714	6.27519	5.57046	6.14386	6.3516	6.55279	6.3405	6.31826	6.15987	6.21993	6.60904	6.16945	6.08346	6.3014	0.95525	1.03354	1.01348	0.997737	0.995841	0.884004	0.975	1.00797	1.03989	1.00621	1.00268	0.97754	0.987072	1.04882	0.979061	0.965414	-0.0660497	0.0475906	0.0193108	-0.00326793	-0.00601268	-0.177875	-0.0365265	0.0114482	0.0564375	0.00892479	0.00385549	-0.0327719	-0.0187735
sp|P35580-3|MYH10_HUMAN	MYH10	MYH10_HUMAN Isoform 3 of Myosin-10	186	6.29225	6.29772	6.16169	5.78771	6.70196	5.69162	6.34248	5.43974	6.70016	6.42887	6.77646	6.12681	6.48935	6.04996	6.47192	6.24129	6.13484	1.02566	1.02655	1.00438	0.943416	1.09244	0.927753	1.03385	0.886696	1.09215	1.04793	1.10459	0.998691	1.05779	0.986164	1.05494	1.01735	0.0365497	0.0378033	0.00629979	-0.0840337	0.127557	-0.108187	0.0480208	-0.173489	0.127169	0.0675389	0.143506	-0.00189019	0.0810477
sp|P35579|MYH9_HUMAN	MYH9	MYH9_HUMAN Myosin-9	188	6.38632	6.21578	6.06332	5.82961	6.63912	6.10816	6.43116	5.89073	6.2866	6.17003	6.71151	6.24619	6.34286	6.06003	6.37353	6.24505	6.12376	1.04288	1.01503	0.990131	0.951966	1.08416	0.997453	1.0502	0.961947	1.02659	1.00756	1.09598	1.01999	1.03578	0.989593	1.04079	1.01981	0.0605677	0.0215183	-0.0143092	-0.0710178	0.116575	-0.0036793	0.0706618	-0.0559707	0.0378628	0.0108604	0.13222	0.0285593	0.0507163
sp|P35749-2|MYH11_HUMAN	MYH11	MYH11_HUMAN Isoform 2 of Myosin-11	11	6.47882	6.00518	6.07887	5.837	6.50397	6.30351	6.17129	6.0085	6.51069	6.29792	6.73485	6.0255	6.27851	6.13371	6.44469	6.18699	6.09997	1.06211	0.984461	0.996541	0.95689	1.06623	1.03337	1.01169	0.985005	1.06733	1.03245	1.10408	0.987792	1.02927	1.00553	1.05651	1.01427	0.0869295	-0.0225941	-0.00499839	-0.0635745	0.092519	0.0473538	0.0167705	-0.0217967	0.0940089	0.0460739	0.142844	-0.0177206	0.0416207
sp|Q7Z406-2|MYH14_HUMAN	MYH14	MYH14_HUMAN Isoform 2 of Myosin-14	29	6.32694	6.19858	5.74884	5.47372	6.61043	6.00849	6.21434	5.58689	6.77382	6.27097	6.94019	6.30121	6.4892	6.18718	6.52926	6.33993	5.93702	1.06568	1.04406	0.968304	0.921964	1.11343	1.01204	1.04671	0.941026	1.14095	1.05625	1.16897	1.06134	1.09301	1.04214	1.09975	1.06786	0.0917689	0.0621988	-0.0464681	-0.117217	0.155005	0.0172635	0.0658622	-0.0876936	0.190231	0.0789496	0.225236	0.0858899	0.128302
sp|P49257|LMAN1_HUMAN	LMAN1	LMAN1_HUMAN Protein ERGIC-53	39	6.31166	6.15145	5.87959	6.08586	6.26353	6.7103	6.32794	6.45687	6.08894	6.42362	6.53604	6.6586	5.99732	6.21493	5.97035	5.923	6.10714	1.03349	1.00726	0.96274	0.996516	1.02561	1.09876	1.03615	1.05727	0.99702	1.05182	1.07023	1.0903	0.982018	1.01765	0.977602	0.969848	0.0475226	0.0104296	-0.0547814	-0.00503577	0.036479	0.13588	0.051239	0.0803381	-0.00430582	0.0728896	0.0979199	0.124722	-0.026179
sp|P50851-2|LRBA_HUMAN	LRBA	LRBA_HUMAN Isoform 2 of Lipopolysaccharide-responsive and beige-like anchor protein	104	6.35161	6.29166	6.16307	6.2913	6.33754	6.00908	6.33019	6.03786	6.23159	6.28963	6.60004	6.41745	6.22963	6.28734	6.03593	6.09609	6.27441	1.0123	1.00275	0.982255	1.00269	1.01006	0.957712	1.00889	0.962299	0.993175	1.00243	1.0519	1.0228	0.992863	1.00206	0.961992	0.97158	0.0176425	0.00396091	-0.0258306	0.00387835	0.0144431	-0.0623357	0.012769	-0.0554425	-0.00987949	0.00349535	0.072995	0.0325203	-0.0103333
sp|P50416|CPT1A_HUMAN	CPT1A	CPT1A_HUMAN Carnitine O-palmitoyltransferase 1, liver isoform	38	6.25764	6.3162	6.41129	6.37083	6.41968	5.83995	6.4244	5.7796	6.38626	6.42125	6.31282	6.30702	6.32967	6.32927	6.00372	6.09039	6.33899	0.987167	0.996405	1.01141	1.00502	1.01273	0.921275	1.01347	0.911754	1.00746	1.01298	0.995872	0.994957	0.99853	0.998467	0.94711	0.960782	-0.0186343	-0.00519614	0.0163617	0.00722835	0.0182484	-0.118297	0.0193087	-0.133283	0.0107183	0.0186012	-0.00596838	-0.00729448	-0.00212271
sp|O00273|DFFA_HUMAN	DFFA	DFFA_HUMAN DNA fragmentation factor subunit alpha	25	6.62681	6.12349	6.21173	6.43825	6.34685	6.40248	6.56053	5.99551	5.56912	6.08622	6.60909	6.60165	6.27585	5.73538	6.20337	6.21369	6.35007	1.04358	0.964319	0.978214	1.01389	0.999493	1.00825	1.03314	0.944164	0.877017	0.958449	1.04079	1.03962	0.988312	0.903199	0.976898	0.978523	0.0615421	-0.0524184	-0.0317774	0.0198961	-0.000731749	0.0118583	0.0470399	-0.08289	-0.189323	-0.061226	0.0576791	0.0560542	-0.0169616
sp|O00273-2|DFFA_HUMAN	DFFA	DFFA_HUMAN Isoform DFF35 of DNA fragmentation factor subunit alpha	1	6.41871	5.72063	5.91429	8.23931	5.83227	6.14724	7.8909	4.43313	5.23047	6.19253	7.26722	7.0853	5.4637	6.36836	5.88334	5.91262	6.57324	0.976492	0.870291	0.899753	1.25346	0.887275	0.935192	1.20046	0.674421	0.795722	0.942083	1.10558	1.0779	0.831204	0.968832	0.895045	0.899499	-0.0343202	-0.20043	-0.152399	0.32592	-0.172546	-0.0966648	0.263586	-0.568278	-0.329663	-0.0860746	0.1448	0.108225	-0.266725
tr|Q9H552|Q9H552_HUMAN		Q9H552_HUMAN Uncharacterized protein	3	1.9817	10.2506	11.2577	3.95219	10.0385	4.97469	4.86349	8.46288	4.21231	16.4668	12.4541	4.58275	0.563984	3.50966	1.34952	1.07923	6.86055	0.288854	1.49414	1.64093	0.576075	1.46322	0.725116	0.708907	1.23356	0.61399	2.40022	1.81532	0.667986	0.0822069	0.511571	0.196707	0.15731	-1.79159	0.579313	0.714516	-0.795671	0.549148	-0.463717	-0.496332	0.302825	-0.703712	1.26316	0.860225	-0.58211	-3.6046
sp|P17661|DESM_HUMAN	DES	DESM_HUMAN Desmin	10	7.02476	7.50184	6.12352	5.18256	6.20783	5.81301	6.37242	6.16433	8.16451	6.41069	6.35804	4.59742	6.01072	6.01994	5.64551	6.4029	6.45817	1.08773	1.1616	0.948182	0.802481	0.961237	0.900102	0.986722	0.954501	1.26421	0.992648	0.984496	0.711877	0.930716	0.932143	0.874166	0.991442	0.121324	0.216119	-0.0767642	-0.317461	-0.0570364	-0.15184	-0.0192841	-0.0671813	0.338241	-0.0106458	-0.0225433	-0.490301	-0.103588
sp|P08670|VIME_HUMAN	VIM	VIME_HUMAN Vimentin	53	6.02358	8.28985	7.18407	4.98486	5.30349	6.0759	6.06353	6.52895	8.13593	5.18019	4.85351	4.60304	6.23813	6.30485	6.55863	7.67148	6.62059	0.909825	1.25213	1.08511	0.752933	0.80106	0.917728	0.915859	0.986158	1.22888	0.782436	0.733093	0.695261	0.942232	0.952309	0.990641	1.15873	-0.136339	0.324386	0.117842	-0.409407	-0.320018	-0.123862	-0.126802	-0.0201088	0.297347	-0.353955	-0.447931	-0.524373	-0.0858462
sp|P12036|NFH_HUMAN	NEFH	NFH_HUMAN Neurofilament heavy polypeptide	12	6.30269	7.85843	7.15121	5.35162	5.60366	6.13252	6.0276	6.09677	7.6952	5.55989	5.08776	5.01627	6.2982	6.40332	6.32123	7.09363	6.66599	0.9455	1.17888	1.07279	0.802825	0.840635	0.919972	0.904232	0.914609	1.1544	0.834068	0.763242	0.752517	0.944826	0.960596	0.948281	1.06415	-0.0808509	0.237422	0.101369	-0.316843	-0.250449	-0.120339	-0.145235	-0.128773	0.20714	-0.261762	-0.389788	-0.410204	-0.081879
sp|P31040|DHSA_HUMAN	SDHA	DHSA_HUMAN Succinate dehydrogenase [ubiquinone] flavoprotein subunit, mitochondrial	63	6.49869	5.87143	6.15226	6.39217	6.2552	6.79784	6.63724	6.16509	5.73259	6.24255	6.55158	6.45474	6.24976	5.96204	5.98427	6.05254	6.22864	1.04336	0.942651	0.987738	1.02625	1.00426	1.09138	1.0656	0.989798	0.92036	1.00223	1.05185	1.0363	1.00339	0.957198	0.960767	0.971728	0.0612323	-0.0852047	-0.0178001	0.0373892	0.0061394	0.12616	0.0916668	-0.0147947	-0.11973	0.00321886	0.0729263	0.0514424	0.00488418
sp|Q9UID3|VPS51_HUMAN	VPS51	VPS51_HUMAN Vacuolar protein sorting-associated protein 51 homolog	29	6.16902	6.43758	6.37409	6.44333	6.18091	5.45788	6.26429	6.06389	6.25402	6.36748	6.41136	6.36015	6.34624	6.24129	6.3984	6.23007	6.356	0.970581	1.01283	1.00285	1.01374	0.972452	0.858697	0.98557	0.954041	0.983955	1.00181	1.00871	1.00065	0.998464	0.981952	1.00667	0.980186	-0.0430789	0.0183982	0.00409913	0.0196862	-0.040301	-0.21978	-0.0209693	-0.0678767	-0.0233364	0.00260226	0.0125102	0.000940531	-0.00221818
sp|Q5T5Y3-3|CAMP1_HUMAN	CAMSAP1	CAMP1_HUMAN Isoform 3 of Calmodulin-regulated spectrin-associated protein 1	22	6.28409	6.25238	6.45919	6.27655	6.44774	6.06749	5.93825	6.09675	6.44574	6.30762	6.04447	6.26343	6.43355	6.37222	6.10898	6.20157	6.31805	0.994625	0.989606	1.02234	0.993431	1.02053	0.960342	0.939886	0.964973	1.02021	0.998349	0.956698	0.991355	1.01828	1.00857	0.966909	0.981564	-0.00777608	-0.0150745	0.0318733	-0.00950815	0.0293136	-0.0583801	-0.0894421	-0.0514395	0.0288661	-0.00238418	-0.0638641	-0.012527	0.0261351
sp|Q5JTZ9|SYAM_HUMAN	AARS2	SYAM_HUMAN Alanine--tRNA ligase, mitochondrial	43	6.24908	6.94794	6.23015	6.23894	6.20585	5.65644	6.4146	5.91361	6.72123	6.32072	6.14826	6.26684	6.47333	6.13435	6.10617	5.97249	6.41653	0.973904	1.08282	0.970954	0.972323	0.967166	0.881542	0.9997	0.921622	1.04749	0.985069	0.958191	0.976672	1.00885	0.956023	0.951632	0.930798	-0.0381489	0.114793	-0.0425259	-0.0404918	-0.0481639	-0.181898	-0.000433445	-0.117754	0.0669325	-0.0217038	-0.0616146	-0.0340546	0.0127153
sp|Q96SB8-2|SMC6_HUMAN	SMC6	SMC6_HUMAN Isoform 2 of Structural maintenance of chromosomes protein 6	22	6.25833	6.28594	6.40498	6.1501	6.25777	6.01008	6.23147	6.54567	6.50549	6.14012	6.22829	6.35778	6.1539	6.09928	6.14104	6.22974	6.27484	0.997369	1.00177	1.02074	0.980121	0.99728	0.957806	0.993089	1.04316	1.03676	0.978531	0.992582	1.01322	0.980727	0.972022	0.978677	0.992813	-0.00380036	0.0025504	0.029616	-0.0289682	-0.00392946	-0.0621939	-0.0100056	0.0609628	0.0520796	-0.0313112	-0.010742	0.018945	-0.0280771
sp|P04406|G3P_HUMAN	GAPDH	G3P_HUMAN Glyceraldehyde-3-phosphate dehydrogenase	417	6.50003	5.98619	6.00282	6.54482	6.14536	6.54982	6.58053	6.02953	5.53635	6.22761	6.83375	6.57956	6.31443	5.73292	6.19399	6.24228	6.25846	1.0386	0.956495	0.959152	1.04575	0.981928	1.04655	1.05146	0.96342	0.884618	0.99507	1.09192	1.05131	1.00894	0.916027	0.989698	0.997414	0.0546375	-0.0641708	-0.0601684	0.0645447	-0.0263113	0.0656464	0.0723949	-0.0537633	-0.176874	-0.00713025	0.126869	0.0721823	0.0128437
sp|P05091|ALDH2_HUMAN	ALDH2	ALDH2_HUMAN Aldehyde dehydrogenase, mitochondrial	23	6.66829	6.00785	5.82367	6.47994	6.29874	6.30412	6.37255	6.22047	5.8903	6.32817	6.52579	6.49778	6.07168	6.14586	6.05761	6.30717	6.24494	1.06779	0.962035	0.932543	1.03763	1.00862	1.00948	1.02043	0.996082	0.943212	1.01333	1.04497	1.04049	0.972256	0.984135	0.970003	1.00997	0.0946297	-0.0558383	-0.100759	0.0532933	0.0123761	0.0136079	0.0291837	-0.00566354	-0.084346	0.0191012	0.0634654	0.0572598	-0.0405914
sp|O94788|AL1A2_HUMAN	ALDH1A2	AL1A2_HUMAN Retinal dehydrogenase 2	85	6.65426	5.9751	5.90075	6.20608	6.45749	6.71859	6.59547	6.1418	5.64668	6.21708	6.60536	6.31864	6.3339	6.1188	6.1086	6.00141	6.18405	1.07604	0.966212	0.954189	1.00356	1.04422	1.08644	1.06653	0.993168	0.913104	1.00534	1.06813	1.02176	1.02423	0.989449	0.9878	0.970466	0.105727	-0.0495885	-0.0676531	0.00513089	0.0624221	0.119607	0.0929241	-0.00988987	-0.131149	0.00768574	0.0950858	0.0310627	0.0345427
sp|P00352|AL1A1_HUMAN	ALDH1A1	AL1A1_HUMAN Retinal dehydrogenase 1	28	6.55184	5.81806	6.07757	6.41699	6.2417	6.29824	6.76989	5.78562	5.72981	6.22667	6.68803	6.50972	6.3375	6.11534	6.25936	6.17366	6.21612	1.05401	0.935964	0.977712	1.03232	1.00412	1.01321	1.08909	0.930745	0.921767	1.0017	1.07592	1.04723	1.01953	0.983788	1.00696	0.99317	0.0758869	-0.095475	-0.0325186	0.0458835	0.00592582	0.0189355	0.123119	-0.103542	-0.117526	0.00244763	0.105568	0.0665823	0.0279006
sp|P30837|AL1B1_HUMAN	ALDH1B1	AL1B1_HUMAN Aldehyde dehydrogenase X, mitochondrial	43	6.37699	6.32562	6.27949	6.30106	6.41243	6.17087	6.23945	5.65801	6.34789	6.43615	6.54798	6.41012	6.31758	5.93492	6.16335	6.07809	6.32079	1.00889	1.00076	0.993466	0.996879	1.0145	0.976281	0.987131	0.895143	1.00429	1.01825	1.03594	1.01413	0.999492	0.938952	0.975092	0.961603	0.0127707	0.00110201	-0.00945749	-0.00451034	0.0207663	-0.034631	-0.018686	-0.15981	0.00617224	0.0260931	0.050945	0.0202465	-0.000732856
sp|Q9UBI1|COMD3_HUMAN	COMMD3	COMD3_HUMAN COMM domain-containing protein 3	5	3.36348	5.41724	4.74262	6.07651	2.43579	5.69576	6.04207	8.51621	6.74033	7.80452	4.80998	8.96733	5.30969	8.28673	8.02465	7.7671	4.89996	0.68643	1.10557	0.967889	1.24011	0.497104	1.16241	1.23308	1.73802	1.37559	1.59277	0.981636	1.83008	1.08362	1.69118	1.6377	1.58513	-0.542816	0.144787	-0.0470864	0.310472	-1.00838	0.217118	0.302272	0.797441	0.460049	0.671539	-0.0267398	0.871908	0.115857
tr|R4GMX3|R4GMX3_HUMAN	COMMD3-BMI1	R4GMX3_HUMAN Protein COMMD3-BMI1	3	6.16298	6.16639	6.47121	6.46683	5.99094	6.44597	6.72006	7.00526	6.498	5.99741	5.64033	5.14123	6.3626	6.24845	6.87271	5.80963	6.31685	0.975641	0.976181	1.02444	1.02374	0.948406	1.02044	1.06383	1.10898	1.02868	0.94943	0.892902	0.813891	1.00724	0.989171	1.088	0.919703	-0.0355778	-0.0347797	0.0348296	0.0338528	-0.0764235	0.0291916	0.0892682	0.149233	0.0407899	-0.0748663	-0.163426	-0.297092	0.0104105
sp|Q86XP3|DDX42_HUMAN	DDX42	DDX42_HUMAN ATP-dependent RNA helicase DDX42	49	6.0308	6.10589	6.06261	6.49139	5.9251	5.53409	6.53366	6.37047	6.35495	6.63024	6.48064	6.5623	6.28315	6.21025	6.20793	6.21652	6.17267	0.977016	0.989181	0.982169	1.05163	0.959892	0.896547	1.05848	1.03204	1.02953	1.07413	1.04989	1.06312	1.0179	1.00609	1.00571	1.0071	-0.0335459	-0.0156937	-0.0259562	0.0726322	-0.0590557	-0.157549	0.0819961	0.0455046	0.0419855	0.103166	0.070241	0.0883063	0.0255928
sp|Q13123|RED_HUMAN	IK	RED_HUMAN Protein Red	15	5.96048	6.23518	6.42258	5.72647	5.98976	6.31864	6.1492	6.51984	7.00552	6.09848	5.83426	6.04183	6.17051	6.53387	6.32209	6.67129	6.08618	0.979347	1.02448	1.05527	0.940898	0.984158	1.0382	1.01036	1.07125	1.15105	1.00202	0.958608	0.992713	1.01386	1.07356	1.03876	1.09614	-0.0301079	0.0348948	0.0776165	-0.0878903	-0.0230382	0.0540777	0.0148623	0.0993002	0.202956	0.0029133	-0.0609867	-0.0105508	0.0198533
sp|Q8TDW7|FAT3_HUMAN	FAT3	FAT3_HUMAN Protocadherin Fat 3	3	6.62233	7.47674	7.01892	5.60429	5.75925	7.9383	7.1963	7.89293	5.13794	6.46714	5.82735	5.42899	5.78628	5.85662	4.59608	5.39053	6.68057	0.991282	1.11918	1.05065	0.838894	0.86209	1.18827	1.0772	1.18148	0.769087	0.968052	0.872283	0.812654	0.866136	0.876665	0.687977	0.806897	-0.0126323	0.162438	0.0712779	-0.25344	-0.21409	0.248859	0.107284	0.24059	-0.378781	-0.0468434	-0.197131	-0.299287	-0.207335
sp|Q9BTX3|TM208_HUMAN	TMEM208	TM208_HUMAN Transmembrane protein 208	4	6.12546	6.14783	6.37095	5.64943	6.42389	7.08215	6.40314	6.08665	5.74935	5.96221	6.59725	6.96109	5.85227	6.37922	6.44917	5.75993	6.07342	1.00857	1.01225	1.04899	0.93019	1.05771	1.16609	1.05429	1.00218	0.946642	0.981689	1.08625	1.14616	0.963588	1.05035	1.06187	0.948384	0.0123096	0.0175687	0.069	-0.104403	0.0809386	0.221679	0.076271	0.00313986	-0.0791097	-0.0266614	0.119356	0.196805	-0.0535122
sp|Q96CT7|CC124_HUMAN	CCDC124	CC124_HUMAN Coiled-coil domain-containing protein 124	18	6.57553	5.97836	6.28734	6.13407	6.40049	6.99395	6.24823	6.64953	5.72216	6.10947	5.94364	6.21591	6.01805	6.45752	6.06928	6.1965	6.24383	1.05313	0.957484	1.00697	0.982422	1.02509	1.12014	1.00071	1.06498	0.916451	0.978482	0.951923	0.995529	0.96384	1.03423	0.972045	0.992421	0.0746771	-0.0626803	0.0100197	-0.0255855	0.0357523	0.163677	0.00101746	0.0908223	-0.12587	-0.0313829	-0.0710834	-0.00646449	-0.053134
sp|Q7Z6Z7|HUWE1_HUMAN	HUWE1	HUWE1_HUMAN E3 ubiquitin-protein ligase HUWE1	149	6.48893	6.35056	6.264	6.45641	6.4563	5.97282	6.40357	5.62333	6.08628	6.23905	6.42279	6.44852	6.27867	6.19286	6.15392	6.16199	6.38997	1.01549	0.993832	0.980286	1.0104	1.01038	0.934717	1.00213	0.880024	0.952473	0.976381	1.00514	1.00916	0.982581	0.969152	0.963059	0.964321	0.0221703	-0.00892647	-0.0287261	0.0149219	0.0148973	-0.097398	0.00306615	-0.184386	-0.0702496	-0.0344839	0.00738984	0.0131578	-0.0253513
sp|Q9UKD2|MRT4_HUMAN	MRTO4	MRT4_HUMAN mRNA turnover protein 4 homolog	37	6.18253	6.51255	6.62359	5.75307	6.76516	4.98031	5.9277	5.61107	7.08978	6.4743	6.18869	5.86477	6.54715	6.34658	6.73432	6.39844	6.26794	0.986374	1.03903	1.05674	0.917857	1.07933	0.79457	0.945718	0.895202	1.13112	1.03292	0.987357	0.935678	1.04455	1.01255	1.07441	1.02082	-0.0197929	0.0552323	0.0796232	-0.123658	0.110134	-0.331755	-0.0805178	-0.159714	0.177751	0.046734	-0.0183562	-0.0959157	0.0628768
sp|Q6XQN6|PNCB_HUMAN	NAPRT1	PNCB_HUMAN Nicotinate phosphoribosyltransferase	29	6.74707	6.11805	5.73641	6.33955	5.97142	6.74372	6.4997	6.14841	5.59502	6.36838	6.42101	6.50129	6.25677	6.19607	6.1647	6.19244	6.23527	1.08208	0.9812	0.919994	1.01672	0.957684	1.08154	1.04241	0.98607	0.897318	1.02135	1.02979	1.04266	1.00345	0.993713	0.988682	0.993131	0.113809	-0.0273801	-0.120304	0.0239284	-0.062378	0.113093	0.0599211	-0.0202387	-0.156309	0.0304744	0.0423482	0.060274	0.00496604
sp|P19623|SPEE_HUMAN	SRM	SPEE_HUMAN Spermidine synthase	45	6.38131	6.17823	6.16555	6.4013	6.57554	5.85165	6.39784	6.15669	6.20792	6.18392	6.57061	6.39223	6.3432	6.09929	6.11514	5.97959	6.2816	1.01587	0.983544	0.981526	1.01906	1.04679	0.931554	1.01851	0.980115	0.988271	0.98445	1.04601	1.01761	1.00981	0.970978	0.973501	0.951922	0.0227211	-0.0239379	-0.0269019	0.0272334	0.0659779	-0.102288	0.0264534	-0.0289766	-0.0170215	-0.0226098	0.0648958	0.0251878	0.0140793
tr|K7ESL0|K7ESL0_HUMAN	SRM	K7ESL0_HUMAN Spermidine synthase (Fragment)	1	5.62827	5.50718	5.94643	6.27249	6.99303	5.8381	7.65005	5.94729	6.04843	7.45941	6.97536	6.1156	4.33798	6.9689	6.31104	6.00045	5.83859	0.963977	0.943238	1.01847	1.07432	1.19773	0.999916	1.31026	1.01862	1.03594	1.2776	1.1947	1.04744	0.742984	1.19359	1.08092	1.02772	-0.0529291	-0.0843069	0.0264032	0.103418	0.260297	-0.0001217	0.389849	0.0266118	0.0509401	0.353441	0.256647	0.0668734	-0.428597
sp|Q13576|IQGA2_HUMAN	IQGAP2	IQGA2_HUMAN Ras GTPase-activating-like protein IQGAP2	49	6.1276	6.25815	6.34063	6.12556	6.20069	5.49317	6.21274	6.35751	6.64785	6.35866	6.28092	6.30247	6.40571	6.30567	6.34404	6.23862	6.21298	0.986257	1.00727	1.02054	0.985929	0.998021	0.884143	0.999961	1.02326	1.06999	1.02345	1.01093	1.0144	1.03102	1.01492	1.02109	1.00413	-0.0199644	0.0104497	0.0293396	-0.0204448	-0.00285781	-0.177648	-5.68917e-05	0.0331753	0.0976013	0.0334362	0.0156893	0.0206308	0.0440719
sp|Q86VI3|IQGA3_HUMAN	IQGAP3	IQGA3_HUMAN Ras GTPase-activating-like protein IQGAP3	17	5.62253	6.59831	7.19845	6.70826	5.93709	5.04619	6.23318	5.931	6.67177	6.01594	6.0723	6.23472	6.45499	6.53007	6.47582	6.26936	6.53189	0.860782	1.01017	1.10205	1.027	0.908939	0.772547	0.954269	0.908007	1.02142	0.921011	0.929639	0.954505	0.988227	0.999722	0.991416	0.959808	-0.21628	0.0145966	0.140186	0.0384387	-0.137744	-0.372305	-0.0675316	-0.139225	0.0305696	-0.11871	-0.105257	-0.0671752	-0.0170851
sp|P46940|IQGA1_HUMAN	IQGAP1	IQGA1_HUMAN Ras GTPase-activating-like protein IQGAP1	136	6.31636	6.31416	6.30409	6.15429	6.54389	5.89468	6.36246	5.86962	6.43765	6.41437	6.40987	6.10166	6.38397	6.15837	6.269	6.06555	6.27222	1.00704	1.00669	1.00508	0.981197	1.04331	0.939807	1.01439	0.935811	1.02637	1.02266	1.02195	0.972806	1.01782	0.981848	0.999486	0.967049	0.0101161	0.00961351	0.00731082	-0.0273849	0.0611712	-0.0895638	0.0206074	-0.0957102	0.0375568	0.0323303	0.0313178	-0.0397755	0.0254766
sp|Q92925|SMRD2_HUMAN	SMARCD2	SMRD2_HUMAN SWI/SNF-related matrix-associated actin-dependent regulator of chromatin subfamily D member 2	28	6.02224	6.29394	6.60272	6.43359	6.19602	5.24434	6.14044	6.26671	6.67247	6.38649	5.98462	6.13755	6.23868	6.58737	6.46398	6.32882	6.33812	0.950162	0.993029	1.04175	1.01506	0.97758	0.827428	0.968811	0.988733	1.05275	1.00763	0.944226	0.968355	0.98431	1.03933	1.01986	0.998532	-0.0737553	-0.0100921	0.0590049	0.0215685	-0.0327137	-0.273294	-0.0457135	-0.0163473	0.0741654	0.0109677	-0.0827959	-0.0463927	-0.0228147
sp|Q96GM5|SMRD1_HUMAN	SMARCD1	SMRD1_HUMAN SWI/SNF-related matrix-associated actin-dependent regulator of chromatin subfamily D member 1	19	6.0106	6.25542	6.40939	6.50613	6.30183	5.36441	6.02319	6.54419	6.50834	6.30352	6.14154	6.06957	6.2541	6.79005	6.37693	6.1408	6.29538	0.954763	0.993652	1.01811	1.03348	1.00102	0.852118	0.956763	1.03952	1.03383	1.00129	0.975562	0.96413	0.993442	1.07858	1.01295	0.975445	-0.0667856	-0.00918786	0.0258924	0.047505	0.00147623	-0.230875	-0.0637668	0.05592	0.047995	0.00186307	-0.0356942	-0.0527003	-0.00949232
sp|Q9BZV1|UBXN6_HUMAN	UBXN6	UBXN6_HUMAN UBX domain-containing protein 6	11	5.70275	6.00932	6.73409	6.28271	6.27291	5.36255	6.26368	6.47154	6.75659	6.38959	5.97449	6.04269	6.43025	6.31206	6.54235	6.45242	6.18222	0.922444	0.972033	1.08927	1.01626	1.01467	0.867415	1.01318	1.0468	1.09291	1.03354	0.966399	0.977431	1.04012	1.021	1.05825	1.04371	-0.116467	-0.0409227	0.123359	0.0232626	0.0210105	-0.205205	0.0188861	0.0659847	0.128171	0.0475989	-0.0493088	-0.0329335	0.0567504
sp|P16401|H15_HUMAN	HIST1H1B	H15_HUMAN Histone H1.5	23	6.40648	6.93944	7.29002	5.05891	6.56822	6.80904	5.09956	6.62393	7.18976	5.6211	4.6082	4.58834	6.42646	7.11761	6.77389	6.87906	6.42371	0.997317	1.08028	1.13486	0.787537	1.0225	1.05999	0.793865	1.03117	1.11925	0.875055	0.717373	0.714282	1.00043	1.10802	1.05451	1.07089	-0.00387543	0.111412	0.182515	-0.344581	0.0320951	0.0840441	-0.333035	0.0442801	0.162536	-0.192555	-0.479204	-0.485435	0.000616926
sp|P16403|H12_HUMAN	HIST1H1C	H12_HUMAN Histone H1.2	10	6.07933	7.08313	7.11136	5.35489	6.76866	6.98478	5.1267	6.30794	7.01878	5.66832	4.4556	4.54632	6.41659	7.33468	6.69685	7.04606	6.40718	0.948831	1.1055	1.10991	0.835764	1.05642	1.09015	0.80015	0.984512	1.09546	0.884683	0.695408	0.709567	1.00147	1.14476	1.04521	1.09971	-0.0757766	0.144698	0.150437	-0.258832	0.0791813	0.124526	-0.321658	-0.02252	0.131531	-0.176768	-0.524069	-0.49499	0.00211784
sp|P10412|H14_HUMAN	HIST1H1E	H14_HUMAN Histone H1.4	8	6.31525	6.88189	7.2203	4.68496	6.37985	6.70939	5.20273	6.47548	7.74989	5.9757	4.43694	4.63753	6.29892	7.13345	6.59928	7.29845	6.2756	1.00632	1.09661	1.15054	0.746536	1.01661	1.06912	0.829041	1.03185	1.23492	0.952212	0.707014	0.738978	1.00372	1.1367	1.05158	1.16299	0.00908645	0.133051	0.202305	-0.421717	0.0237691	0.0964282	-0.270485	0.0452337	0.304422	-0.0706457	-0.500188	-0.436397	0.00535109
sp|P16402|H13_HUMAN	HIST1H1D	H13_HUMAN Histone H1.3	27	6.21789	6.8587	7.17245	5.1664	6.45473	6.79633	5.27802	6.18655	7.11579	5.78458	5.05056	5.23174	6.43017	6.8214	6.69679	6.73788	6.35386	0.9786	1.07945	1.12883	0.813112	1.01588	1.06964	0.830679	0.973668	1.11992	0.910404	0.794881	0.823396	1.01201	1.07358	1.05397	1.06044	-0.0312082	0.110302	0.174833	-0.298474	0.0227234	0.0971226	-0.267636	-0.0384982	0.163391	-0.135421	-0.33119	-0.280342	0.0172236
sp|Q96D46|NMD3_HUMAN	NMD3	NMD3_HUMAN 60S ribosomal export protein NMD3	38	6.56481	6.05066	6.09667	6.21691	6.64631	6.2385	6.39856	5.90774	6.04164	6.17548	6.41813	6.26424	6.36226	6.20521	6.27421	6.13866	6.23226	1.05336	0.970861	0.978243	0.997537	1.06644	1.001	1.02668	0.947929	0.969414	0.990889	1.02982	1.00513	1.02086	0.995659	1.00673	0.984981	0.0749973	-0.0426635	-0.0317345	-0.00355831	0.0927976	0.00144319	0.0379913	-0.0771497	-0.0448158	-0.0132047	0.042397	0.00738349	0.0297833
sp|Q9P2R3-4|ANFY1_HUMAN	ANKFY1	ANFY1_HUMAN Isoform 4 of Ankyrin repeat and FYVE domain-containing protein 1	21	6.12144	6.40438	6.44454	6.29119	6.3561	5.50587	6.34449	5.86109	6.75316	6.51657	6.10644	6.14956	6.41138	6.27666	6.26145	6.1957	6.31539	0.96929	1.01409	1.02045	0.996168	1.00645	0.871818	1.00461	0.928065	1.06932	1.03186	0.966915	0.973742	1.0152	0.993868	0.991459	0.981048	-0.0450002	0.0201877	0.0292061	-0.00553832	0.00927056	-0.197901	0.00663294	-0.107702	0.0966915	0.0452415	-0.0485397	-0.0383881	0.0217637
sp|O75175|CNOT3_HUMAN	CNOT3	CNOT3_HUMAN CCR4-NOT transcription complex subunit 3	20	6.37626	6.42411	6.27037	6.0703	6.42187	5.74052	6.05271	6.21697	6.69245	6.34061	6.05975	6.06626	6.44649	6.15896	6.39609	6.26628	6.28526	1.01448	1.02209	0.997631	0.965799	1.02173	0.913331	0.963001	0.989135	1.06478	1.00881	0.964121	0.965157	1.02565	0.979905	1.01763	0.99698	0.020738	0.0315242	-0.00342185	-0.0502046	0.031021	-0.130791	-0.0543912	-0.0157608	0.090562	0.0126492	-0.0527141	-0.0511651	0.0365414
sp|Q9H497|TOR3A_HUMAN	TOR3A	TOR3A_HUMAN Torsin-3A	12	6.37447	6.00004	6.38994	6.48388	6.21095	6.80238	6.54732	5.22226	5.68976	6.27221	6.55516	6.69594	6.09339	6.17118	6.26219	6.22894	6.31208	1.00988	0.950564	1.01233	1.02722	0.983978	1.07768	1.03727	0.827343	0.901408	0.993683	1.03851	1.06081	0.965353	0.977677	0.992096	0.986828	0.0141893	-0.0731439	0.0176863	0.0387413	-0.0233021	0.107924	0.0527884	-0.273442	-0.149748	-0.0091422	0.0545149	0.0851705	-0.050871
sp|O95685|PPR3D_HUMAN	PPP1R3D	PPR3D_HUMAN Protein phosphatase 1 regulatory subunit 3D	3	6.11071	6.13247	6.97323	6.39856	6.34976	5.69566	6.55155	6.44259	5.8643	6.00652	6.25552	6.11424	6.77678	6.44657	6.23917	5.64238	6.40374	0.95424	0.957638	1.08893	0.999191	0.99157	0.889427	1.02308	1.00607	0.915761	0.93797	0.976854	0.954792	1.05825	1.00669	0.974301	0.881107	-0.0675753	-0.062447	0.122912	-0.00116803	-0.0122132	-0.169052	0.032921	0.00872549	-0.126956	-0.0923859	-0.0337855	-0.0667421	0.0816846
sp|P46379-3|BAG6_HUMAN	BAG6	BAG6_HUMAN Isoform 3 of Large proline-rich protein BAG6	52	6.36625	6.07595	6.17088	6.61554	6.3159	5.83893	6.46867	6.30014	6.21661	6.47135	6.36802	6.28329	6.13458	6.26582	6.06471	6.04337	6.30715	1.00937	0.963342	0.978394	1.04889	1.00139	0.925763	1.02561	0.998888	0.985644	1.02603	1.00965	0.996216	0.972638	0.993446	0.96156	0.958177	0.0134544	-0.0538794	-0.0315131	0.0688695	0.00199894	-0.111285	0.0364797	-0.0016055	-0.0208613	0.0370773	0.0138555	-0.00546922	-0.0400248
tr|F6WML8|F6WML8_HUMAN	BAG6	F6WML8_HUMAN Large proline-rich protein BAG6 (Fragment)	1	6.63284	6.00788	4.43901	4.48987	6.43351	8.51317	7.23305	6.48881	5.69546	7.96017	6.80532	6.43405	5.27141	5.97156	3.89872	7.72516	5.3924	1.23003	1.11414	0.823197	0.832629	1.19307	1.57873	1.34134	1.20333	1.0562	1.47618	1.26202	1.19317	0.977563	1.1074	0.723003	1.4326	0.298699	0.155928	-0.28069	-0.264254	0.254679	0.658769	0.423677	0.267026	0.0788849	0.561872	0.335735	0.2548	-0.0327386
sp|Q9NSD9|SYFB_HUMAN	FARSB	SYFB_HUMAN Phenylalanine--tRNA ligase beta subunit	83	6.27304	6.27995	6.28622	6.40469	6.59225	6.28519	6.31768	5.95517	6.04904	6.34769	6.32048	6.2819	6.4472	5.8402	6.18972	6.1296	6.31098	0.993989	0.995084	0.996077	1.01485	1.04457	0.995914	1.00106	0.943621	0.958495	1.00582	1.00151	0.995393	1.02159	0.925404	0.980787	0.97126	-0.00869815	-0.00710984	-0.00567015	0.0212658	0.062908	-0.00590655	0.00153196	-0.0837202	-0.0611567	0.00836877	0.00217122	-0.00666193	0.0308098
sp|P52758|UK114_HUMAN	HRSP12	UK114_HUMAN Ribonuclease UK114	9	5.43315	5.80361	5.64488	6.84146	4.61977	6.71088	6.9513	6.15689	5.90197	6.7288	6.28105	7.23492	6.06878	6.44764	6.5254	6.64949	5.93078	0.916094	0.978558	0.951795	1.15355	0.778949	1.13154	1.17207	1.03813	0.995143	1.13456	1.05906	1.21989	1.02327	1.08715	1.10026	1.12118	-0.126432	-0.0312701	-0.0712777	0.206084	-0.3604	0.178281	0.229062	0.0539812	-0.00702405	0.182129	0.0827851	0.286756	0.0331859
sp|Q9Y315|DEOC_HUMAN	DERA	DEOC_HUMAN Putative deoxyribose-phosphate aldolase	10	6.27017	5.64676	6.32521	6.66662	6.11671	5.94503	6.70651	5.59769	5.87927	6.5466	6.65417	6.84189	6.16612	5.91008	6.21642	6.51074	6.22719	1.0069	0.906791	1.01574	1.07057	0.982258	0.954689	1.07697	0.898911	0.944129	1.05129	1.06857	1.09871	0.990193	0.949077	0.99827	1.04553	0.00992326	-0.141158	0.0225321	0.0983742	-0.0258254	-0.0668972	0.106981	-0.15375	-0.0829443	0.0721645	0.0956774	0.135814	-0.0142183
sp|Q86UP2|KTN1_HUMAN	KTN1	KTN1_HUMAN Kinectin	81	6.21075	6.29808	6.58227	5.9105	6.62861	5.99637	5.63764	6.38087	6.85697	6.25753	5.83052	5.83436	6.16577	6.78427	6.41007	6.2154	6.2504	0.993656	1.00763	1.0531	0.945619	1.06051	0.959358	0.901965	1.02087	1.09704	1.00114	0.932823	0.933438	0.98646	1.08541	1.02555	0.9944	-0.00918102	0.0109636	0.0746367	-0.0806683	0.0847579	-0.0598591	-0.148857	0.0298046	0.133623	0.00164478	-0.100324	-0.0993741	-0.0196674
sp|Q9Y4F3|MARF1_HUMAN	KIAA0430	MARF1_HUMAN Meiosis arrest female protein 1	12	5.3775	7.39848	7.85242	5.74523	5.85655	5.41481	4.70789	6.16409	7.92603	5.30355	4.90526	5.39534	6.57759	7.42191	7.30433	6.64902	6.59341	0.815587	1.1221	1.19095	0.87136	0.888243	0.821246	0.71403	0.934887	1.20211	0.804372	0.743964	0.818293	0.997601	1.12566	1.10782	1.00843	-0.294089	0.166205	0.252113	-0.19866	-0.170973	-0.284114	-0.485944	-0.0971363	0.265574	-0.314066	-0.426695	-0.28931	-0.00346517
sp|Q8TE68|ES8L1_HUMAN	EPS8L1	ES8L1_HUMAN Epidermal growth factor receptor kinase substrate 8-like protein 1	1	6.15348	7.40119	6.33347	6.41952	5.74839	5.25721	6.14352	5.82189	5.9536	6.50312	6.25342	6.14704	6.31625	6.17613	6.32358	7.04821	6.57691	0.935618	1.12533	0.962985	0.976069	0.874025	0.799343	0.934104	0.885201	0.905227	0.98878	0.950814	0.934639	0.960367	0.939062	0.961481	1.07166	-0.0960085	0.170346	-0.0544149	-0.0349456	-0.194253	-0.323114	-0.0983455	-0.175923	-0.143649	-0.016279	-0.0727656	-0.0975192	-0.0583428
sp|Q99543|DNJC2_HUMAN	DNAJC2	DNJC2_HUMAN DnaJ homolog subfamily C member 2	46	6.23132	6.13641	6.55456	6.24229	6.40923	5.57343	5.97396	6.04312	6.64663	6.28089	6.12269	6.1615	6.38411	6.49468	6.53495	6.21023	6.29115	0.990491	0.975404	1.04187	0.992234	1.01877	0.885917	0.949582	0.960576	1.05651	0.99837	0.973223	0.979392	1.01478	1.03235	1.03875	0.987138	-0.0137848	-0.0359277	0.0591763	-0.0112472	0.0268284	-0.174757	-0.074635	-0.058029	0.0793004	-0.00235361	-0.039157	-0.030041	0.0211629
sp|O60231|DHX16_HUMAN	DHX16	DHX16_HUMAN Putative pre-mRNA-splicing factor ATP-dependent RNA helicase DHX16	53	6.3399	6.14338	6.23713	6.14072	6.48179	5.93229	6.51502	6.16236	6.3013	6.39218	6.40338	6.36486	6.18646	6.24663	6.09562	6.05699	6.21528	1.02005	0.988431	1.00352	0.988003	1.04288	0.954468	1.04823	0.991485	1.01384	1.02846	1.03026	1.02407	0.995363	1.00504	0.980747	0.974532	0.0286401	-0.0167873	0.00506236	-0.0174121	0.0605723	-0.0672308	0.0679496	-0.012337	0.0198295	0.0404881	0.0430137	0.0343088	-0.00670586
sp|Q14562|DHX8_HUMAN	DHX8	DHX8_HUMAN ATP-dependent RNA helicase DHX8	21	6.09142	6.10965	6.3306	5.90939	6.23732	6.21909	6.17356	6.61005	6.64354	6.12673	5.9891	6.3584	6.12394	6.51624	6.2233	6.33766	6.11027	0.996916	0.999899	1.03606	0.967125	1.02079	1.01781	1.01036	1.08179	1.08728	1.00269	0.98017	1.04061	1.00224	1.06644	1.0185	1.03722	-0.00445637	-0.000145215	0.0511073	-0.0482257	0.0296913	0.0254685	0.0148677	0.113426	0.120717	0.00388232	-0.0288957	0.0574288	0.0032252
sp|Q92620|PRP16_HUMAN	DHX38	PRP16_HUMAN Pre-mRNA-splicing factor ATP-dependent RNA helicase PRP16	31	6.25614	6.10982	6.15955	6.03882	6.22231	6.31949	6.2063	5.98209	6.42973	6.45604	6.4392	6.49736	6.34739	5.93746	6.29591	6.30239	6.14108	1.01874	0.994909	1.00301	0.983348	1.01323	1.02905	1.01062	0.97411	1.047	1.05129	1.04854	1.05802	1.03359	0.966843	1.02521	1.02627	0.0267798	-0.00736311	0.00433197	-0.0242263	0.0189573	0.0413151	0.0152405	-0.0378434	0.0662652	0.0721565	0.0683885	0.0813607	0.0476705
sp|O43143|DHX15_HUMAN	DHX15	DHX15_HUMAN Putative pre-mRNA-splicing factor ATP-dependent RNA helicase DHX15	96	6.41402	6.14734	6.18392	5.98782	6.3488	6.68447	6.08966	6.02535	6.10978	6.13966	6.23231	6.20253	6.22393	6.28197	6.42444	6.50397	6.18328	1.03732	0.994188	1.0001	0.96839	1.02677	1.08106	0.98486	0.974459	0.988114	0.992946	1.00793	1.00311	1.00657	1.01596	1.039	1.05186	0.0528577	-0.00840889	0.000150485	-0.0463403	0.0381128	0.112442	-0.0220095	-0.0373261	-0.0172507	-0.0102124	0.0113958	0.00448564	0.00945466
sp|Q96IZ5|RBM41_HUMAN	RBM41	RBM41_HUMAN RNA-binding protein 41	2	6.15661	5.93351	6.68912	7.12488	5.84074	5.94389	5.30239	5.70985	5.91717	6.69991	7.02447	6.89566	6.87199	6.00292	5.453	6.4339	6.47603	0.950677	0.916226	1.0329	1.10019	0.901901	0.917829	0.818772	0.88169	0.913703	1.03457	1.08469	1.0648	1.06114	0.926944	0.842028	0.993494	-0.0729735	-0.126224	0.0467068	0.137756	-0.148959	-0.123702	-0.288467	-0.181657	-0.130202	0.049032	0.11728	0.090579	0.0856183
sp|Q9Y5K8|VATD_HUMAN	ATP6V1D	VATD_HUMAN V-type proton ATPase subunit D	17	6.75257	5.96815	6.1956	6.28129	6.17687	6.49005	6.33931	6.31784	5.81454	6.07381	6.71563	6.1927	6.16076	6.14626	6.1697	6.20491	6.2994	1.07194	0.947415	0.983522	0.997125	0.980549	1.03026	1.00634	1.00293	0.92303	0.964188	1.06607	0.983061	0.977991	0.975689	0.97941	0.985	0.100222	-0.0779312	-0.023971	-0.00415412	-0.028339	0.0430146	0.00911082	0.00421641	-0.11555	-0.0526132	0.0923078	-0.0246464	-0.0321067
sp|Q9UHI6|DDX20_HUMAN	DDX20	DDX20_HUMAN Probable ATP-dependent RNA helicase DDX20	26	5.64675	6.49422	7.09208	6.25746	6.18672	5.27313	5.70915	7.68233	7.02496	6.23296	5.44393	5.92481	6.12896	6.45278	6.3228	6.12695	6.37263	0.886094	1.01908	1.1129	0.981928	0.970827	0.827466	0.895886	1.20552	1.10236	0.978083	0.854268	0.929728	0.961763	1.01258	0.992181	0.961448	-0.174468	0.0272679	0.15432	-0.0263112	-0.0427136	-0.273229	-0.158612	0.269656	0.140602	-0.0319709	-0.22724	-0.105119	-0.056246
sp|P22102|PUR2_HUMAN	GART	PUR2_HUMAN Trifunctional purine biosynthetic protein adenosine-3	149	6.25135	6.29399	6.33383	6.44363	6.55742	5.73186	6.47485	6.11097	6.08293	6.23122	6.56317	6.15829	6.38566	6.21968	6.19075	5.97041	6.3307	0.987466	0.994201	1.00049	1.01784	1.03581	0.905407	1.02277	0.965291	0.960862	0.984286	1.03672	0.972766	1.00868	0.982463	0.977893	0.943088	-0.0181973	-0.00839014	0.000713115	0.0255086	0.0507633	-0.143362	0.0324817	-0.0509636	-0.0575986	-0.0228504	0.0520278	-0.0398352	0.0124707
tr|C9JZG2|C9JZG2_HUMAN	GART	C9JZG2_HUMAN Phosphoribosylformylglycinamidine cyclo-ligase (Fragment)	2	7.85517	6.32095	5.84216	7.37822	6.28198	6.72702	6.25005	6.86139	5.76135	5.63524	6.2907	5.98594	5.52422	7.49792	4.61266	5.17504	6.84912	1.14689	0.922884	0.852979	1.07725	0.917195	0.982172	0.912533	1.00179	0.84118	0.822768	0.918468	0.873971	0.806559	1.09473	0.673467	0.755577	0.197723	-0.115778	-0.229418	0.107353	-0.1247	-0.0259521	-0.132052	0.00258118	-0.249513	-0.281443	-0.122699	-0.194342	-0.310149
tr|C9JKQ7|C9JKQ7_HUMAN	GART	C9JKQ7_HUMAN Phosphoribosylformylglycinamidine cyclo-ligase (Fragment)	1	6.21206	3.40169	2.58535	8.75525	6.06999	6.58316	8.84062	5.3852	2.391	7.16614	3.61121	4.16965	3.47051	25.1694	3.84806	2.34067	5.23859	1.18583	0.649353	0.49352	1.6713	1.15871	1.25667	1.6876	1.02799	0.456421	1.36795	0.689348	0.795949	0.66249	4.80462	0.734561	0.446813	0.245894	-0.622926	-1.01882	0.740971	0.212516	0.329602	0.75497	0.0398221	-1.13156	0.452018	-0.536696	-0.329252	-0.59403
sp|Q0VDF9|HSP7E_HUMAN	HSPA14	HSP7E_HUMAN Heat shock 70 kDa protein 14	46	6.25131	6.5777	6.47592	6.09341	6.52442	5.72006	6.027	6.32741	6.65429	6.35628	6.29631	5.89615	6.30394	6.09685	6.28657	6.11237	6.34958	0.984523	1.03593	1.0199	0.959655	1.02753	0.900856	0.949196	0.996508	1.04799	1.00105	0.99161	0.928588	0.992811	0.960197	0.990076	0.962641	-0.0225038	0.0509209	0.0284229	-0.0594125	0.0391874	-0.150632	-0.0752222	-0.00504722	0.0676224	0.00152038	-0.0121557	-0.106889	-0.0104085
sp|Q8TCJ2|STT3B_HUMAN	STT3B	STT3B_HUMAN Dolichyl-diphosphooligosaccharide--protein glycosyltransferase subunit STT3B	26	6.67079	6.30076	5.84711	6.03124	6.39076	6.73189	6.23464	6.15994	6.1801	6.28631	6.364	6.21467	6.14782	6.13875	6.17642	6.12481	6.21248	1.07377	1.01421	0.941188	0.970827	1.0287	1.08361	1.00357	0.991544	0.994789	1.01188	1.02439	1.00035	0.989593	0.988133	0.994196	0.985889	0.102689	0.0203577	-0.0874444	-0.0427135	0.0408194	0.115843	0.00513812	-0.0122518	-0.00753796	0.0170453	0.0347657	0.000509645	-0.0150932
sp|P46977|STT3A_HUMAN	STT3A	STT3A_HUMAN Dolichyl-diphosphooligosaccharide--protein glycosyltransferase subunit STT3A	41	6.63775	6.18672	5.72208	5.79215	6.48305	6.59948	6.40312	6.25119	6.11491	6.24536	6.60746	6.44162	6.18822	6.24322	6.09644	5.98722	6.08467	1.0909	1.01677	0.940408	0.951924	1.06547	1.08461	1.05234	1.02737	1.00497	1.02641	1.08592	1.05866	1.01702	1.02606	1.00193	0.983984	0.125514	0.0239945	-0.0886405	-0.0710812	0.0914925	0.117172	0.0735948	0.0389506	0.00715106	0.0376045	0.118916	0.0822434	0.0243443
sp|Q4KMP7|TB10B_HUMAN	TBC1D10B	TB10B_HUMAN TBC1 domain family member 10B	16	6.23177	6.39206	6.41125	6.14422	6.61741	6.22105	6.24981	5.73152	6.07323	6.09818	6.51824	6.73074	6.11901	6.0005	6.33555	6.12545	6.29483	0.989983	1.01545	1.0185	0.976075	1.05125	0.98828	0.992849	0.910513	0.964797	0.968761	1.03549	1.06925	0.97207	0.953243	1.00647	0.973093	-0.0145243	0.0221147	0.0264394	-0.0349364	0.0721004	-0.0170082	-0.0103539	-0.135248	-0.0517023	-0.0457875	0.0503162	0.0965989	-0.040868
sp|Q92499|DDX1_HUMAN	DDX1	DDX1_HUMAN ATP-dependent RNA helicase DDX1	86	6.01428	6.4794	6.7347	5.74053	6.6273	5.98238	5.59686	6.00939	7.1191	6.09892	5.63202	5.80396	6.50929	6.72096	6.57793	6.35298	6.24223	0.963483	1.03799	1.07889	0.919628	1.06169	0.958373	0.896613	0.9627	1.14047	0.977042	0.902245	0.92979	1.04278	1.07669	1.05378	1.01774	-0.0536689	0.0537993	0.109553	-0.120877	0.0863603	-0.0613414	-0.157443	-0.0548424	0.189634	-0.0335071	-0.148408	-0.105023	0.0604393
sp|P46926|GNPI1_HUMAN	GNPDA1	GNPI1_HUMAN Glucosamine-6-phosphate isomerase 1	28	6.63068	5.88735	5.79043	6.40597	6.10691	6.68307	6.5034	5.78247	5.81348	6.32017	6.79493	6.80137	6.30029	6.08127	6.06472	6.03349	6.17861	1.07317	0.95286	0.937174	1.0368	0.988396	1.08165	1.05257	0.935886	0.940905	1.02291	1.09975	1.10079	1.01969	0.984246	0.981567	0.976513	0.101875	-0.0696633	-0.0936112	0.0521353	-0.0168391	0.113229	0.0739124	-0.0955959	-0.0878797	0.0326816	0.137177	0.138544	0.0281365
sp|Q8TDQ7|GNPI2_HUMAN	GNPDA2	GNPI2_HUMAN Glucosamine-6-phosphate isomerase 2	9	6.23271	5.76418	6.01993	6.3542	5.72737	6.75737	6.76627	5.77804	5.64626	6.49734	6.60399	6.81025	6.1735	5.98439	6.40455	6.47967	6.09275	1.02297	0.946071	0.988047	1.04291	0.94003	1.10908	1.11054	0.948346	0.926717	1.0664	1.08391	1.11776	1.01325	0.982214	1.05117	1.0635	0.0327649	-0.0799793	-0.017348	0.0606158	-0.0892219	0.149367	0.151266	-0.0765145	-0.109799	0.0927545	0.116243	0.160613	0.0189939
sp|Q8IYS2-2|K2013_HUMAN	KIAA2013	K2013_HUMAN Isoform 2 of Uncharacterized protein KIAA2013	10	6.3975	5.85396	6.5702	6.99118	6.16365	6.16734	6.7322	6.54383	5.42138	6.07118	6.79681	6.40475	5.83039	6.08526	6.01312	5.95725	6.45321	0.991367	0.907139	1.01813	1.08336	0.955129	0.955701	1.04323	1.01404	0.840106	0.9408	1.05324	0.992491	0.903487	0.942982	0.931803	0.923145	-0.0125087	-0.140604	0.0259203	0.115519	-0.066232	-0.0653686	0.0610611	0.0201183	-0.251357	-0.08804	0.0748408	-0.0108747	-0.146425
sp|P28838|AMPL_HUMAN	LAP3	AMPL_HUMAN Cytosol aminopeptidase	80	6.51306	5.98563	6.14239	6.30322	6.36467	6.60003	6.49292	6.1534	5.84858	6.32058	6.65419	6.41058	6.24872	5.67364	6.17882	6.10958	6.23607	1.04442	0.959839	0.984977	1.01077	1.02062	1.05836	1.04119	0.986742	0.937862	1.01355	1.06705	1.02798	1.00203	0.909809	0.990819	0.979716	0.0626972	-0.0591352	-0.0218382	0.0154507	0.0294474	0.0818343	0.0582292	-0.0192545	-0.0925519	0.0194187	0.0936248	0.0398166	0.00292242
sp|Q99459|CDC5L_HUMAN	CDC5L	CDC5L_HUMAN Cell division cycle 5-like protein	26	5.23913	6.5604	7.22821	5.16163	6.47011	5.92709	5.0404	6.97069	7.89427	6.18985	4.73177	5.28856	6.06768	7.54377	6.70442	6.98201	6.04734	0.866352	1.08484	1.19527	0.853537	1.06991	0.980115	0.83349	1.15269	1.30541	1.02357	0.782454	0.874526	1.00336	1.24745	1.10866	1.15456	-0.206974	0.117482	0.257337	-0.228475	0.0974889	-0.0289773	-0.262763	0.205	0.384505	0.0336032	-0.353921	-0.193426	0.00484371
sp|P30566|PUR8_HUMAN	ADSL	PUR8_HUMAN Adenylosuccinate lyase	48	6.66837	5.80958	5.8829	6.22792	6.19709	6.81183	6.53831	5.98521	5.72218	6.3015	6.68627	6.54162	6.2396	6.00137	6.24352	6.14273	6.14719	1.08478	0.945079	0.957006	1.01313	1.00812	1.10812	1.06363	0.973649	0.930861	1.0251	1.08769	1.06416	1.01503	0.976278	1.01567	0.999274	0.117406	-0.0814938	-0.0634002	0.0188227	0.0116633	0.148115	0.0889901	-0.0385258	-0.103363	0.0357676	0.121274	0.0897203	0.0215259
sp|O75533|SF3B1_HUMAN	SF3B1	SF3B1_HUMAN Splicing factor 3B subunit 1	76	5.95439	6.30604	6.20623	6.17179	6.38378	6.0217	6.15601	6.64747	6.54364	6.28582	6.02381	6.22704	6.1271	6.38893	6.15825	6.39799	6.15961	0.966683	1.02377	1.00757	1.00198	1.03639	0.97761	0.999415	1.0792	1.06235	1.02049	0.977953	1.01095	0.994722	1.03723	0.999779	1.0387	-0.0488859	0.0338947	0.0108776	0.00284938	0.0515713	-0.0326688	-0.000844019	0.109966	0.0872538	0.0292614	-0.0321633	0.015707	-0.0076352
sp|Q9UBS0|KS6B2_HUMAN	RPS6KB2	KS6B2_HUMAN Ribosomal protein S6 kinase beta-2	7	6.14109	6.3749	6.44432	5.99568	6.35893	5.22361	6.6242	6.57539	6.62885	6.44742	6.35014	6.2465	6.11719	6.2257	6.14273	6.10334	6.239	0.984307	1.02178	1.03291	0.961001	1.01922	0.837251	1.06174	1.05392	1.06249	1.03341	1.01781	1.0012	0.980476	0.997869	0.98457	0.978257	-0.0228195	0.0310885	0.0467139	-0.0573908	0.0274698	-0.256267	0.086432	0.0757622	0.0874444	0.0474077	0.0254742	0.00173382	-0.0284451
sp|P31751|AKT2_HUMAN	AKT2	AKT2_HUMAN RAC-beta serine/threonine-protein kinase	23	6.27515	6.06013	6.18457	6.36489	6.49177	5.65623	6.29645	6.06637	6.59288	6.48247	6.42472	6.07736	6.39441	6.2897	6.28624	6.05666	6.22119	1.00867	0.974112	0.994114	1.0231	1.04349	0.909189	1.0121	0.975115	1.05975	1.042	1.03272	0.976881	1.02784	1.01101	1.01046	0.973554	0.0124605	-0.0378407	-0.00851612	0.0329462	0.0614225	-0.137349	0.0173492	-0.0363559	0.0837194	0.0593542	0.0464442	-0.0337447	0.0396218
sp|P31749|AKT1_HUMAN	AKT1	AKT1_HUMAN RAC-alpha serine/threonine-protein kinase	13	5.94964	5.99155	6.08403	6.01082	5.99729	6.08468	6.08526	6.34635	6.93056	6.80322	6.76693	6.33768	6.2762	6.13174	5.9269	6.27714	6.00901	0.99012	0.997094	1.01248	1.0003	0.99805	1.01259	1.01269	1.05614	1.15336	1.13217	1.12613	1.0547	1.04446	1.02042	0.986336	1.04462	-0.0143249	-0.00419805	0.0178999	0.000434495	-0.00281659	0.0180541	0.0181916	0.0787998	0.205845	0.17909	0.171374	0.0768275	0.062764
sp|P23443|KS6B1_HUMAN	RPS6KB1	KS6B1_HUMAN Ribosomal protein S6 kinase beta-1	16	6.46008	6.18454	5.98326	6.17796	6.36887	6.10466	6.17708	5.90184	6.28422	6.59012	6.79062	6.35538	6.24616	6.13376	6.25673	5.98472	6.20146	1.0417	0.997272	0.964815	0.996211	1.027	0.984391	0.996069	0.951686	1.01335	1.06267	1.095	1.02482	1.00721	0.989083	1.00891	0.96505	0.0589441	-0.00394161	-0.0516762	-0.00547738	0.0384295	-0.022697	-0.00568289	-0.0714431	0.0191258	0.0876968	0.130935	0.0353705	0.0103616
sp|O95714|HERC2_HUMAN	HERC2	HERC2_HUMAN E3 ubiquitin-protein ligase HERC2	67	5.55153	6.79454	7.17633	5.74121	6.19211	5.5961	5.32467	6.22689	7.5685	6.11357	5.3686	5.85082	6.25755	7.13677	6.65346	6.44736	6.3159	0.878977	1.07578	1.13623	0.909009	0.9804	0.886033	0.843058	0.985907	1.19832	0.967965	0.850013	0.926363	0.990761	1.12997	1.05345	1.02081	-0.186103	0.105387	0.184257	-0.137634	-0.0285578	-0.174567	-0.246297	-0.0204771	0.261019	-0.0469738	-0.234443	-0.11035	-0.013391
sp|P11474|ERR1_HUMAN	ESRRA	ERR1_HUMAN Steroid hormone receptor ERR1	7	6.46964	6.20582	6.32708	6.80188	5.97738	5.98535	6.10148	5.13144	6.33517	6.57692	6.55269	6.61657	5.96184	6.0664	6.17309	6.71725	6.45111	1.00287	0.961978	0.980775	1.05437	0.926567	0.927802	0.945804	0.795436	0.982029	1.0195	1.01575	1.02565	0.924158	0.940366	0.956904	1.04126	0.00413914	-0.0559244	-0.0280065	0.0763873	-0.110033	-0.108111	-0.0803871	-0.330183	-0.026163	0.0278658	0.022541	0.0365372	-0.113789
sp|P0CG12|CTF8A_HUMAN	CHTF8	CTF8A_HUMAN Chromosome transmission fidelity protein 8 homolog isoform 2	2	6.74088	6.1347	5.54548	7.12434	4.5043	7.7134	6.24871	5.75048	5.21927	6.8123	6.09579	7.383	5.49602	6.27336	5.66776	7.29021	6.38635	1.05551	0.960596	0.868333	1.11556	0.705301	1.20779	0.978448	0.900433	0.817254	1.0667	0.954503	1.15606	0.860589	0.982308	0.88748	1.14153	0.0779453	-0.0579988	-0.203679	0.157765	-0.503689	0.272375	-0.0314332	-0.151309	-0.291144	0.0931503	-0.0671784	0.209216	-0.216604
sp|P39059|COFA1_HUMAN	COL15A1	COFA1_HUMAN Collagen alpha-1(XV) chain	4	6.18258	6.21451	6.17441	6.85057	5.70261	7.51217	6.6423	7.31785	4.96528	6.17801	6.45954	5.98106	5.50071	6.1212	5.47792	6.71929	6.35552	0.972789	0.977813	0.971504	1.07789	0.897269	1.18199	1.04512	1.15142	0.781255	0.97207	1.01637	0.941082	0.865502	0.963132	0.861916	1.05724	-0.0398006	-0.032369	-0.0417083	0.108214	-0.156387	0.24122	0.0636733	0.20341	-0.356135	-0.0408674	0.0234218	-0.0876084	-0.208392
sp|Q13144|EI2BE_HUMAN	EIF2B5	EI2BE_HUMAN Translation initiation factor eIF-2B subunit epsilon	28	6.38612	6.25788	6.49022	6.31806	6.52083	5.95131	5.89891	6.2593	6.36124	6.27075	6.02452	6.34555	6.16147	6.3535	6.13882	6.26152	6.36307	1.00362	0.983469	1.01998	0.992926	1.02479	0.935289	0.927054	0.983692	0.999712	0.985491	0.946795	0.997247	0.968317	0.998496	0.964758	0.984041	0.00521667	-0.024049	0.0285444	-0.0102414	0.0353326	-0.0965157	-0.109275	-0.0237217	-0.000414974	-0.021085	-0.0788767	-0.00397778	-0.0464484
sp|O75446|SAP30_HUMAN	SAP30	SAP30_HUMAN Histone deacetylase complex subunit SAP30	6	5.97174	6.36893	6.88541	6.40727	6.07918	5.88359	6.22399	6.07496	6.7167	6.05529	6.01042	6.10309	6.04666	6.43692	6.62432	6.11153	6.40834	0.93187	0.993851	1.07445	0.999833	0.948636	0.918115	0.971233	0.947978	1.04812	0.944908	0.937906	0.952367	0.943561	1.00446	1.0337	0.953684	-0.101799	-0.00889911	0.103592	-0.000240344	-0.0760734	-0.123253	-0.0421104	-0.0770752	0.0678025	-0.0817541	-0.0924843	-0.0704103	-0.0838117
sp|Q15785|TOM34_HUMAN	TOMM34	TOM34_HUMAN Mitochondrial import receptor subunit TOM34	26	6.19205	6.28578	6.31008	6.22098	6.18317	5.38552	6.21419	5.9654	6.60934	6.46349	6.24712	6.37899	6.55282	6.32696	6.48596	6.17815	6.25222	0.990376	1.00537	1.00925	0.995003	0.988956	0.861377	0.993917	0.954125	1.05712	1.03379	0.999184	1.02028	1.04808	1.01195	1.03738	0.988153	-0.013952	0.00772266	0.0132892	-0.00722725	-0.0160224	-0.215283	-0.00880277	-0.0677502	0.0801371	0.0479442	-0.00117788	0.0289589	0.0677468
sp|Q5T6V5|CI064_HUMAN	C9orf64	CI064_HUMAN UPF0553 protein C9orf64	26	6.01784	6.20585	6.39939	6.45378	6.07184	5.46636	6.22902	5.85776	6.40852	6.46516	6.59718	6.44452	6.4472	6.16195	6.51694	6.25668	6.26922	0.959903	0.989893	1.02076	1.02944	0.968517	0.871937	0.993589	0.934369	1.02222	1.03126	1.05231	1.02796	1.02839	0.98289	1.03951	0.998001	-0.0590391	-0.014656	0.0296496	0.0418596	-0.046151	-0.197704	-0.0092796	-0.0979357	0.0317064	0.0444013	0.0735647	0.0397881	0.0403879
sp|Q9BQ69|MACD1_HUMAN	MACROD1	MACD1_HUMAN O-acetyl-ADP-ribose deacetylase MACROD1	5	6.17892	6.91712	6.66058	6.51387	6.41394	4.76839	6.24068	6.34713	6.07499	6.24986	5.90731	6.89143	6.20087	5.98786	6.51447	6.13259	6.56762	0.940815	1.05322	1.01415	0.991816	0.9766	0.726045	0.950219	0.966427	0.924991	0.951617	0.899459	1.0493	0.944157	0.911724	0.991907	0.933761	-0.0880165	0.0748003	0.0202766	-0.0118563	-0.0341603	-0.461869	-0.073668	-0.0492668	-0.112489	-0.0715473	-0.15287	0.0694322	-0.0829006
sp|O00628|PEX7_HUMAN	PEX7	PEX7_HUMAN Peroxisomal targeting signal 2 receptor	6	5.95717	6.23081	6.29796	6.99158	6.09465	5.89209	6.4691	5.95815	5.87256	6.46228	6.86777	6.43999	6.77523	5.83747	5.73562	6.11757	6.36938	0.935283	0.978244	0.988787	1.09769	0.956867	0.925065	1.01566	0.935436	0.921999	1.01459	1.07825	1.01109	1.06372	0.91649	0.900499	0.960466	-0.0965258	-0.0317332	-0.0162684	0.134466	-0.0636096	-0.112373	0.0224121	-0.0962885	-0.117163	0.0208903	0.108689	0.0159055	0.089117
sp|Q13574|DGKZ_HUMAN	DGKZ	DGKZ_HUMAN Diacylglycerol kinase zeta	16	6.18782	6.45674	5.99096	6.02669	6.38763	6.42544	5.83876	6.00209	6.56728	6.35498	6.44982	6.49181	6.10216	6.51706	6.19781	6.00294	6.16555	1.00361	1.04723	0.971683	0.977478	1.03602	1.04215	0.946997	0.973488	1.06516	1.03072	1.04611	1.05292	0.989718	1.05701	1.00523	0.973626	0.00520105	0.0665758	-0.041443	-0.0328643	0.0510506	0.0595651	-0.0785682	-0.0387652	0.0910658	0.0436574	0.0650287	0.0743906	-0.0149102
sp|P27694|RFA1_HUMAN	RPA1	RFA1_HUMAN Replication protein A 70 kDa DNA-binding subunit	50	6.26234	6.27598	6.25363	6.1399	6.46042	5.84513	6.28141	6.27921	6.53197	6.37728	6.25123	6.18241	6.18234	6.32539	6.2352	6.11616	6.23296	1.00471	1.0069	1.00332	0.985069	1.03649	0.937777	1.00777	1.00742	1.04797	1.02315	1.00293	0.991889	0.991878	1.01483	1.00036	0.981261	0.00678381	0.00992272	0.00477583	-0.0217029	0.0517099	-0.0926829	0.0111704	0.010665	0.0676001	0.0330232	0.00422205	-0.0117487	-0.011765
sp|Q86YH6|DLP1_HUMAN	PDSS2	DLP1_HUMAN Decaprenyl-diphosphate synthase subunit 2	11	5.90419	6.33526	6.48775	6.156	6.19887	6.05123	6.19345	5.59022	6.67981	6.34167	6.69797	6.40321	6.49569	5.32697	6.63191	6.5058	6.2208	0.949105	1.0184	1.04291	0.989583	0.996475	0.972741	0.995603	0.898634	1.07379	1.01943	1.07671	1.02932	1.04419	0.856316	1.06609	1.04581	-0.075361	0.0263037	0.0606181	-0.0151069	-0.00509488	-0.0398717	-0.00635685	-0.154195	0.102707	0.0277627	0.106624	0.0416952	0.0623827
sp|P82970|HMGN5_HUMAN	HMGN5	HMGN5_HUMAN High mobility group nucleosome-binding domain-containing protein 5	13	6.59252	5.83823	6.07762	6.38373	6.26615	6.76584	6.76039	5.74883	5.52986	6.29426	6.61133	6.65095	6.31195	5.95872	6.13223	6.07738	6.22302	1.05938	0.938166	0.976634	1.02582	1.00693	1.08723	1.08635	0.9238	0.888613	1.01145	1.0624	1.06876	1.01429	0.957528	0.98541	0.976596	0.083214	-0.092085	-0.0341096	0.0367836	0.00996326	0.120653	0.11949	-0.114348	-0.170373	0.0164207	0.0873245	0.0959444	0.0204697
tr|Q5JSK9|Q5JSK9_HUMAN	HMGN5	Q5JSK9_HUMAN High mobility group nucleosome-binding domain-containing protein 5 (Fragment)	1	9.17979	4.53484	5.05854	7.2853	4.82883	4.82335	5.70652	18.1433	6.23632	4.62563	6.12579	5.74321	4.06568	4.49481	4.58155	4.56656	6.51462	1.40911	0.696102	0.776491	1.1183	0.74123	0.740389	0.875956	2.78501	0.957281	0.710039	0.940315	0.881588	0.624086	0.689958	0.703272	0.700971	0.494781	-0.522629	-0.364959	0.161308	-0.432007	-0.433645	-0.191069	1.47768	-0.0629855	-0.494031	-0.0887846	-0.181823	-0.680184
sp|Q7L1T6|NB5R4_HUMAN	CYB5R4	NB5R4_HUMAN Cytochrome b5 reductase 4	14	6.57966	6.04802	6.0099	6.2931	6.28687	5.98111	6.42284	6.2323	6.07333	6.25502	6.77567	6.86394	6.05868	6.07974	5.80315	6.23668	6.23267	1.05567	0.970374	0.964258	1.0097	1.0087	0.959638	1.03051	0.999941	0.974435	1.00359	1.08712	1.10128	0.972084	0.975463	0.931086	1.00064	0.0781627	-0.0433874	-0.0525093	0.0139205	0.0124916	-0.0594371	0.043361	-8.56476e-05	-0.0373626	0.00516417	0.120513	0.139187	-0.0408468
sp|O75369-8|FLNB_HUMAN	FLNB	FLNB_HUMAN Isoform 8 of Filamin-B	179	6.35116	6.12785	6.25448	6.39329	6.5355	6.00962	6.43106	6.12605	6.20484	6.23207	6.40599	6.29414	6.33636	6.04352	6.16644	6.08764	6.2817	1.01106	0.975509	0.995668	1.01777	1.0404	0.956688	1.02378	0.975222	0.987765	0.9921	1.01979	1.00198	1.0087	0.962084	0.981652	0.969108	0.0158662	-0.0357729	-0.00626395	0.0254046	0.0571437	-0.0638801	0.0339027	-0.0361968	-0.0177599	-0.0114425	0.0282676	0.00285537	0.0125004
sp|P21333|FLNA_HUMAN	FLNA	FLNA_HUMAN Filamin-A	277	6.25175	6.2818	6.28065	6.24462	6.5142	5.67011	6.38301	6.14839	6.52236	6.42126	6.25156	6.0444	6.49898	6.08271	6.32296	6.08124	6.26471	0.997932	1.00273	1.00255	0.996794	1.03983	0.905088	1.01888	0.981433	1.04113	1.02499	0.997902	0.964834	1.0374	0.970949	1.0093	0.970715	-0.00298649	0.00393144	0.0036673	-0.00463279	0.0563414	-0.14387	0.0269903	-0.0270379	0.0581475	0.0356098	-0.00303033	-0.0516474	0.0529667
tr|H0Y5C6|H0Y5C6_HUMAN	FLNA	H0Y5C6_HUMAN Filamin-A (Fragment)	1	6.62587	5.57719	5.35509	6.00296	6.24099	5.24022	5.40526	6.62592	6.68323	7.37177	6.01768	8.30687	5.52201	6.56363	6.66269	5.79863	5.89028	1.12488	0.946847	0.909141	1.01913	1.05954	0.889639	0.917658	1.12489	1.13462	1.25151	1.02163	1.41027	0.937479	1.11432	1.13113	0.984441	0.169774	-0.0787972	-0.137425	0.0273385	0.0834393	-0.168708	-0.123972	0.169785	0.18221	0.323675	0.0308718	0.495969	-0.0931421
sp|Q14315|FLNC_HUMAN	FLNC	FLNC_HUMAN Filamin-C	268	6.37051	6.18335	6.17683	6.34789	6.50147	5.99749	6.42811	6.16657	6.20351	6.29388	6.38413	6.3033	6.29999	6.14425	6.14007	6.05865	6.26964	1.01609	0.986236	0.985196	1.01248	1.03698	0.956592	1.02527	0.98356	0.989452	1.00387	1.01826	1.00537	1.00484	0.98	0.979333	0.966347	0.0230251	-0.0199951	-0.0215171	0.0178934	0.0523822	-0.0640249	0.0360109	-0.0239155	-0.015299	0.00556592	0.0261063	0.00772357	0.00696578
sp|Q96GM8|TOE1_HUMAN	TOE1	TOE1_HUMAN Target of EGR1 protein 1	15	6.16759	6.2497	6.35289	5.44018	7.0625	6.93505	5.44546	6.58191	7.13441	5.97577	5.39828	5.67381	6.12012	6.86725	6.32799	6.26711	6.05259	1.019	1.03257	1.04962	0.898819	1.16686	1.1458	0.899691	1.08745	1.17874	0.987308	0.891896	0.937419	1.01116	1.1346	1.0455	1.03544	0.0271542	0.0462343	0.0698604	-0.153898	0.222626	0.196354	-0.152499	0.120954	0.237242	-0.018428	-0.165053	-0.0932348	0.0160073
sp|Q9BZE9-2|ASPC1_HUMAN	ASPSCR1	ASPC1_HUMAN Isoform 2 of Tether containing UBX domain for GLUT4	15	6.19467	6.28773	6.36308	6.41833	6.41804	5.83777	6.30772	5.77153	6.33765	6.20134	6.43102	5.89256	6.43183	6.41567	6.3548	6.33626	6.31595	0.980797	0.995532	1.00746	1.01621	1.01616	0.92429	0.998697	0.913802	1.00344	0.981853	1.01822	0.932965	1.01835	1.01579	1.00615	1.00322	-0.0279729	-0.00646105	0.0107249	0.0231976	0.0231325	-0.113583	-0.0018817	-0.130047	0.00494767	-0.0264203	0.0260473	-0.100106	0.026229
sp|Q9Y520-4|PRC2C_HUMAN	PRRC2C	PRC2C_HUMAN Isoform 4 of Protein PRRC2C	142	6.06328	6.10209	6.70491	5.88788	6.26404	6.82013	5.62586	6.51266	6.70467	6.19009	5.53466	6.01261	6.11942	6.77654	6.42218	6.25899	6.18954	0.979601	0.985871	1.08326	0.951263	1.01204	1.10188	0.90893	1.0522	1.08323	1.00009	0.894196	0.971415	0.988671	1.09484	1.03759	1.01122	-0.0297337	-0.0205287	0.115386	-0.0720839	0.0172612	0.139967	-0.137759	0.0734147	0.115334	0.000128192	-0.161338	-0.0418408	-0.0164373
sp|P48634|PRC2A_HUMAN	PRRC2A	PRC2A_HUMAN Protein PRRC2A	91	6.08666	6.13847	6.71176	6.07454	6.21935	6.89281	5.68379	6.37052	6.46155	6.24786	5.60139	6.11365	6.08239	6.75779	6.22718	6.33029	6.25286	0.973421	0.981706	1.07339	0.971482	0.994641	1.10235	0.908991	1.01882	1.03338	0.999201	0.895813	0.977737	0.972738	1.08075	0.995893	1.01238	-0.0388649	-0.0266365	0.102175	-0.0417405	-0.00775183	0.140577	-0.137662	0.0268955	0.0473646	-0.00115351	-0.158731	-0.0324817	-0.0398773
sp|Q8NE71|ABCF1_HUMAN	ABCF1	ABCF1_HUMAN ATP-binding cassette sub-family F member 1	64	6.22846	6.12218	6.78156	6.05072	6.98559	6.44056	5.72956	6.73996	6.57553	6.02299	5.50493	5.69795	5.97657	6.75854	6.28578	6.0991	6.29573	0.989315	0.972434	1.07717	0.961083	1.10958	1.023	0.910071	1.07056	1.04444	0.956679	0.874391	0.90505	0.949305	1.07351	0.99842	0.968768	-0.0154982	-0.0403282	0.107244	-0.0572668	0.150008	0.0328125	-0.135949	0.0983664	0.0627335	-0.0638938	-0.193649	-0.143931	-0.0750559
sp|Q5JSZ5|PRC2B_HUMAN	PRRC2B	PRC2B_HUMAN Protein PRRC2B	34	6.1268	6.16928	6.73074	6.21299	6.24734	6.61999	5.93445	6.30185	6.26641	6.22276	5.84036	6.07418	6.15776	6.62097	6.28369	6.19044	6.30995	0.970974	0.977706	1.06669	0.984633	0.990077	1.04913	0.94049	0.998716	0.993099	0.986182	0.925579	0.962635	0.975881	1.04929	0.995838	0.98106	-0.0424954	-0.032527	0.093136	-0.0223414	-0.0143871	0.0691999	-0.0885148	-0.00185373	-0.00998998	-0.0200745	-0.111572	-0.0549395	-0.0352235
sp|Q9HD40|SPCS_HUMAN	SEPSECS	SPCS_HUMAN O-phosphoseryl-tRNA(Sec) selenium transferase	8	7.32988	5.3397	5.19944	5.18576	5.81136	6.07938	5.77474	13.6187	5.38695	5.32824	6.00234	5.80114	5.56617	6.06251	5.55113	5.96253	5.7637	1.27173	0.926437	0.902102	0.899728	1.00827	1.05477	1.00192	2.36284	0.934635	0.924449	1.0414	1.0065	0.965729	1.05184	0.96312	1.0345	0.346796	-0.110235	-0.148638	-0.152439	0.0118818	0.0769302	0.002762	1.24052	-0.0975253	-0.113335	0.058531	0.00934244	-0.050309
sp|Q9Y3D6|FIS1_HUMAN	FIS1	FIS1_HUMAN Mitochondrial fission 1 protein	13	6.26344	5.86939	6.12331	6.30205	5.41842	6.74899	6.79375	6.05442	5.84971	6.39655	6.83139	6.85887	6.19259	5.79646	6.33446	6.16619	6.13955	1.02018	0.955997	0.997355	1.02647	0.882544	1.09927	1.10656	0.986135	0.952792	1.04186	1.11269	1.11716	1.00864	0.944118	1.03175	1.00434	0.0288229	-0.0649218	-0.00382061	0.0376889	-0.18026	0.136539	0.146076	-0.0201436	-0.0697672	0.0591617	0.154047	0.159839	0.0124106
sp|Q8N5M9|JAGN1_HUMAN	JAGN1	JAGN1_HUMAN Protein jagunal homolog 1	5	4.81753	5.49565	5.41968	6.85145	4.82206	6.00672	6.71435	7.53821	5.46113	6.79808	5.5506	7.95032	5.48879	6.85399	7.03929	7.19214	5.64608	0.853253	0.973357	0.959902	1.21349	0.854055	1.06387	1.18921	1.33512	0.967243	1.20404	0.98309	1.40811	0.972142	1.21394	1.24676	1.27383	-0.228955	-0.0389588	-0.0590413	0.27916	-0.227599	0.0893285	0.249999	0.416973	-0.0480494	0.267878	-0.0246052	0.493764	-0.0407608
sp|Q9NVU0|RPC5_HUMAN	POLR3E	RPC5_HUMAN DNA-directed RNA polymerase III subunit RPC5	33	5.8559	6.20675	6.4658	6.15949	6.30536	5.51706	5.96563	6.20753	6.70325	6.44835	6.02344	6.2105	6.31795	6.87673	6.36126	6.375	6.17198	0.948787	1.00563	1.0476	0.997976	1.02161	0.893887	0.966566	1.00576	1.08608	1.04478	0.975932	1.00624	1.02365	1.11418	1.03067	1.03289	-0.0758436	0.00810348	0.0670943	-0.00292365	0.0308442	-0.161835	-0.0490601	0.00828477	0.119126	0.0631955	-0.0351469	0.00897487	0.033722
sp|P23677|IP3KA_HUMAN	ITPKA	IP3KA_HUMAN Inositol-trisphosphate 3-kinase A	11	6.06395	6.33764	6.46102	6.09792	6.17155	5.70147	5.94624	5.87888	6.76657	6.45518	6.33876	6.26838	6.45602	6.44617	6.53785	6.0724	6.24013	0.971766	1.01563	1.0354	0.97721	0.989009	0.913678	0.952903	0.942108	1.08436	1.03446	1.01581	1.00453	1.0346	1.03302	1.04771	0.97312	-0.0413188	0.022369	0.0501853	-0.0332594	-0.0159438	-0.130243	-0.069599	-0.0860353	0.116848	0.0488807	0.022624	0.00651598	0.0490684
sp|Q96DU7|IP3KC_HUMAN	ITPKC	IP3KC_HUMAN Inositol-trisphosphate 3-kinase C	8	5.8427	6.36186	6.5861	6.03752	6.21392	5.1497	5.94935	6.15413	6.83068	6.38468	6.26474	6.24875	6.73019	6.44331	6.55089	6.25149	6.20705	0.941301	1.02494	1.06107	0.972688	1.00111	0.829654	0.958483	0.991475	1.10047	1.02862	1.0093	1.00672	1.08428	1.03806	1.0554	1.00716	-0.0872714	0.035542	0.0855178	-0.0399505	0.00159706	-0.269418	-0.0611746	-0.0123517	0.138123	0.0407077	0.013348	0.00966102	0.116741
sp|Q8IUC4|RHPN2_HUMAN	RHPN2	RHPN2_HUMAN Rhophilin-2	14	5.83724	8.41774	6.4659	5.755	5.91271	5.61793	6.16895	5.80615	6.84297	6.11014	5.96549	6.35074	6.26124	6.17552	6.02552	6.28673	6.61897	0.881896	1.27176	0.976874	0.869471	0.893298	0.848762	0.932011	0.877198	1.03384	0.923126	0.901272	0.959476	0.945954	0.933003	0.910341	0.949805	-0.18132	0.346826	-0.0337555	-0.201791	-0.162787	-0.236568	-0.101582	-0.189025	0.0480159	-0.115401	-0.149966	-0.059682	-0.0801583
sp|P05386|RLA1_HUMAN	RPLP1	RLA1_HUMAN 60S acidic ribosomal protein P1	2	3.27572	4.96523	6.91576	6.31314	2.38199	7.35745	5.2442	7.96652	5.71424	7.0063	5.05946	8.61494	4.28834	8.26364	7.76771	8.86535	5.36746	0.610292	0.925061	1.28846	1.17619	0.443783	1.37075	0.977035	1.48422	1.06461	1.30533	0.942617	1.60503	0.798951	1.53958	1.44718	1.65168	-0.712428	-0.11238	0.365648	0.234118	-1.17207	0.454966	-0.0335175	0.569709	0.0903214	0.384413	-0.0852568	0.682601	-0.323821
sp|P05387|RLA2_HUMAN	RPLP2	RLA2_HUMAN 60S acidic ribosomal protein P2	29	4.56488	6.17133	6.8377	6.33725	3.20726	7.32876	5.78366	7.57041	6.5758	6.61864	4.80569	6.05676	5.72512	8.20073	7.0367	7.17932	5.97779	0.76364	1.03238	1.14385	1.06013	0.536529	1.226	0.967525	1.26642	1.10004	1.10721	0.803924	1.01321	0.957732	1.37187	1.17714	1.201	-0.389035	0.0459692	0.193899	0.0842447	-0.898271	0.293957	-0.0476295	0.340759	0.137554	0.146923	-0.314869	0.018934	-0.0623063
sp|P98160|PGBM_HUMAN	HSPG2	PGBM_HUMAN Basement membrane-specific heparan sulfate proteoglycan core protein	7	5.99416	5.91514	6.44916	6.52265	6.22547	7.20774	6.6572	6.28346	5.41133	5.84783	6.18159	6.2065	6.15903	6.1736	6.38527	6.37989	6.22028	0.963648	0.950945	1.0368	1.04861	1.00083	1.15875	1.07024	1.01016	0.86995	0.940124	0.99378	0.997785	0.990154	0.992496	1.02652	1.02566	-0.0534213	-0.0725666	0.0521323	0.0684793	0.00120382	0.212568	0.0979366	0.0145803	-0.200996	-0.0890776	-0.00900097	-0.00319902	-0.0142758
sp|Q9Y230|RUVB2_HUMAN	RUVBL2	RUVB2_HUMAN RuvB-like 2	69	6.41888	6.23294	6.24748	6.2646	6.18802	6.81128	6.5756	6.30291	5.74792	5.98899	6.48753	6.29223	6.24015	6.13835	6.06673	5.99638	6.29097	1.02033	0.990775	0.993086	0.995807	0.983634	1.08271	1.04524	1.0019	0.913677	0.951997	1.03124	1.0002	0.991921	0.975739	0.964354	0.953172	0.029038	-0.0133708	-0.0100093	-0.00606123	-0.0238058	0.114642	0.0638389	0.00273443	-0.130244	-0.0709709	0.0443857	0.000287778	-0.0117029
sp|Q9H0N5|PHS2_HUMAN	PCBD2	PHS2_HUMAN Pterin-4-alpha-carbinolamine dehydratase 2	8	5.95766	6.03231	5.7237	6.34592	5.11427	6.84264	6.42887	6.39369	6.05226	6.52937	6.38345	7.17212	6.02351	6.29386	6.3416	6.36478	6.0149	0.990484	1.00289	0.951587	1.05503	0.850267	1.13762	1.06882	1.06298	1.00621	1.08553	1.06127	1.19239	1.00143	1.04638	1.05432	1.05817	-0.0137944	0.00417042	-0.0715921	0.0772892	-0.234012	0.186013	0.096025	0.0881086	0.00893381	0.118404	0.0857962	0.253859	0.00206426
sp|P61457|PHS_HUMAN	PCBD1	PHS_HUMAN Pterin-4-alpha-carbinolamine dehydratase	8	5.39152	5.71299	5.22542	6.36789	4.32604	6.46277	6.83996	7.0516	5.60941	6.74127	6.72367	7.39391	6.26618	6.57432	6.40308	6.90998	5.67445	0.950139	1.00679	0.920867	1.1222	0.762371	1.13892	1.2054	1.24269	0.988537	1.188	1.1849	1.30302	1.10428	1.15858	1.1284	1.21773	-0.0737898	0.00976417	-0.118935	0.166334	-0.391435	0.187671	0.269506	0.313469	-0.0166328	0.248539	0.244767	0.381856	0.143104
sp|Q96JN8|NEUL4_HUMAN	NEURL4	NEUL4_HUMAN Neuralized-like protein 4	10	5.71821	6.82898	7.31463	6.70967	5.80588	7.15844	5.81114	7.0012	6.0735	6.1339	5.30433	5.85647	5.98172	6.70624	5.55731	6.03837	6.64287	0.860804	1.02802	1.10112	1.01006	0.874001	1.07761	0.874793	1.05394	0.914288	0.923381	0.798499	0.881617	0.900472	1.00954	0.836582	0.909	-0.216244	0.0398629	0.138978	0.0144346	-0.194292	0.107838	-0.192986	0.075795	-0.129279	-0.115003	-0.324637	-0.181776	-0.151247
sp|P33316|DUT_HUMAN	DUT	DUT_HUMAN Deoxyuridine 5'-triphosphate nucleotidohydrolase, mitochondrial	45	6.57436	6.01667	6.13853	6.47369	6.39859	6.07791	6.69767	5.89867	5.95259	6.34038	6.59245	6.18136	6.24507	5.93715	6.30488	6.17004	6.30081	1.04341	0.954904	0.974244	1.02744	1.01552	0.964623	1.06299	0.936176	0.944734	1.00628	1.04629	0.981042	0.991153	0.942283	1.00065	0.979245	0.0613126	-0.0665726	-0.0376447	0.0390504	0.0222161	-0.0519626	0.0881214	-0.0951482	-0.0820204	0.00903143	0.0652768	-0.0276136	-0.0128201
sp|Q9H9Y6|RPA2_HUMAN	POLR1B	RPA2_HUMAN DNA-directed RNA polymerase I subunit RPA2	31	5.87898	6.67845	7.30382	6.47049	6.15512	5.64715	5.49476	6.0569	6.98681	6.0334	5.60995	5.8567	6.15478	6.76538	6.4116	6.4957	6.58293	0.893064	1.01451	1.10951	0.982919	0.935012	0.857847	0.834698	0.920091	1.06135	0.916521	0.852196	0.889679	0.93496	1.02771	0.973973	0.986748	-0.163165	0.0207824	0.14992	-0.024856	-0.096944	-0.221208	-0.260674	-0.120151	0.085903	-0.12576	-0.230743	-0.168643	-0.0970237
sp|Q15907|RB11B_HUMAN	RAB11B	RB11B_HUMAN Ras-related protein Rab-11B	52	6.27084	5.83569	5.95212	6.21487	5.89474	6.93703	6.5248	6.30382	5.82639	6.36174	6.83031	6.80335	6.18878	5.95764	6.112	5.98589	6.06838	1.03336	0.961655	0.980842	1.02414	0.971386	1.14314	1.07521	1.0388	0.960123	1.04834	1.12556	1.12111	1.01984	0.981751	1.00719	0.986407	0.0473473	-0.0564082	-0.0279078	0.0344128	-0.0418832	0.193007	0.104622	0.0549149	-0.0587092	0.06811	0.17064	0.164934	0.0283436
sp|P62491|RB11A_HUMAN	RAB11A	RB11A_HUMAN Ras-related protein Rab-11A	10	6.01347	5.68963	6.18949	6.29061	6.13581	6.36346	7.07617	6.59909	5.7582	6.31371	6.99515	6.65982	6.20671	6.18687	5.99358	5.52823	6.0458	0.994652	0.941088	1.02377	1.04049	1.01489	1.05254	1.17043	1.09152	0.95243	1.04431	1.15703	1.10156	1.02662	1.02333	0.991363	0.914392	-0.00773553	-0.0875984	0.0338873	0.0572667	0.0213206	0.0738782	0.227035	0.126334	-0.0703154	0.0625547	0.210422	0.13955	0.0378955
sp|Q9H444|CHM4B_HUMAN	CHMP4B	CHM4B_HUMAN Charged multivesicular body protein 4b	22	6.42462	5.67667	5.70681	6.09831	6.23299	6.71277	6.77884	6.46531	5.67413	6.25814	6.6172	6.37977	6.3209	6.15762	6.1116	6.38433	5.9766	1.07496	0.949816	0.954859	1.02036	1.0429	1.12317	1.13423	1.08177	0.949391	1.04711	1.10718	1.06746	1.05761	1.03029	1.02259	1.06822	0.104286	-0.0742807	-0.0666411	0.0290839	0.0605988	0.167583	0.181713	0.113394	-0.0749264	0.0664083	0.146895	0.0941788	0.0808044
sp|Q96CF2|CHM4C_HUMAN	CHMP4C	CHM4C_HUMAN Charged multivesicular body protein 4c	12	6.32389	5.94961	6.18463	6.62978	6.13984	6.7142	6.6194	6.5012	5.72971	6.31957	6.47676	6.35775	6.11345	5.83532	6.00721	6.09768	6.27198	1.00828	0.948602	0.986073	1.05705	0.978932	1.07051	1.05539	1.03655	0.913541	1.00759	1.03265	1.01368	0.974724	0.93038	0.957786	0.97221	0.0118919	-0.0761253	-0.0202331	0.0800406	-0.0307193	0.0982951	0.0777801	0.0517857	-0.130458	0.010906	0.0463519	0.0195959	-0.0369336
sp|Q8TEX9-2|IPO4_HUMAN	IPO4	IPO4_HUMAN Isoform 2 of Importin-4	44	6.18691	6.43706	6.52248	6.25876	6.2763	5.4904	6.40127	6.47306	6.34248	6.00447	6.34292	6.13914	6.2824	6.37214	6.29324	6.17696	6.3513	0.974117	1.0135	1.02695	0.985429	0.988191	0.864453	1.00787	1.01917	0.998611	0.945392	0.99868	0.966595	0.989151	1.00328	0.990858	0.97255	-0.0378334	0.0193494	0.0383681	-0.0211756	-0.0171382	-0.210141	0.0113057	0.0273954	-0.00200542	-0.0810156	-0.00190534	-0.0490159	-0.0157367
sp|Q8TF46|DI3L1_HUMAN	DIS3L	DI3L1_HUMAN DIS3-like exonuclease 1	18	6.2414	6.23944	6.75938	6.27317	6.12845	5.46498	5.90089	5.79962	6.81754	6.47995	6.10658	6.16086	6.30389	6.44571	6.45641	6.42172	6.37835	0.978529	0.978222	1.05974	0.98351	0.960821	0.856802	0.925144	0.909267	1.06886	1.01593	0.957392	0.965902	0.988327	1.01056	1.01224	1.0068	-0.031313	-0.0317661	0.0837082	-0.023988	-0.0576605	-0.222966	-0.11225	-0.137224	0.0960686	0.0228	-0.0628181	-0.0500509	-0.0169403
sp|Q15833|STXB2_HUMAN	STXBP2	STXB2_HUMAN Syntaxin-binding protein 2	33	6.22955	6.51191	6.4785	6.39295	6.13802	5.36344	6.17791	5.67955	6.64515	6.4378	6.28431	6.29137	6.43705	6.14854	6.45094	6.33301	6.40323	0.972877	1.01697	1.01176	0.998395	0.958582	0.837615	0.964812	0.886982	1.03778	1.0054	0.981429	0.982531	1.00528	0.960225	1.00745	0.989034	-0.0396713	0.0242815	0.0168605	-0.00231746	-0.0610259	-0.255641	-0.0516804	-0.173023	0.0535025	0.00776849	-0.0270449	-0.0254251	0.00760041
sp|Q9UQ80|PA2G4_HUMAN	PA2G4	PA2G4_HUMAN Proliferation-associated protein 2G4	156	6.23386	6.16044	6.21864	6.00588	6.60178	6.23563	5.98806	6.2622	6.38124	6.1641	6.37853	6.16026	6.3815	6.25936	6.40106	6.16745	6.15471	1.01286	1.00093	1.01039	0.975819	1.07264	1.01315	0.972924	1.01747	1.03681	1.00153	1.03637	1.0009	1.03685	1.017	1.04003	1.00207	0.018436	0.00134369	0.0149094	-0.0353141	0.101165	0.0188456	-0.039601	0.0249799	0.0521471	0.00220056	0.0515343	0.00130153	0.0522059
sp|Q5JU85-2|IQEC2_HUMAN	IQSEC2	IQEC2_HUMAN Isoform 2 of IQ motif and SEC7 domain-containing protein 2	12	5.9164	6.51302	6.84215	6.32957	6.084	5.42262	6.29214	5.86769	6.56848	6.26395	5.98941	6.31182	6.68862	6.64845	6.21386	6.04782	6.40029	0.924396	1.01761	1.06904	0.988951	0.950583	0.847247	0.983103	0.916786	1.02628	0.978699	0.935804	0.986178	1.04505	1.03877	0.970872	0.94493	-0.113417	0.0251905	0.0963136	-0.0160287	-0.073116	-0.239146	-0.0245854	-0.125343	0.0374234	-0.0310635	-0.0957223	-0.0200801	0.0635724
sp|Q6DN90|IQEC1_HUMAN	IQSEC1	IQEC1_HUMAN IQ motif and SEC7 domain-containing protein 1	19	5.73576	6.53359	6.69184	6.79904	6.02991	5.35756	6.08892	5.84891	6.76099	6.38435	6.12295	6.054	6.2581	6.18931	6.64762	6.49715	6.44006	0.890638	1.01452	1.0391	1.05574	0.936313	0.831912	0.945476	0.908208	1.04983	0.99135	0.95076	0.940054	0.971746	0.961064	1.03223	1.00887	-0.167089	0.0208024	0.0553294	0.0782575	-0.0949371	-0.265497	-0.0808872	-0.138906	0.0701609	-0.0125338	-0.0728467	-0.0891849	-0.0413489
sp|Q9BRD0|BUD13_HUMAN	BUD13	BUD13_HUMAN BUD13 homolog	8	5.79644	11.5706	7.02858	4.95825	6.39108	6.71472	4.95383	7.04595	5.71906	5.34306	4.79273	6.1634	5.4643	6.47437	5.84049	5.74316	7.33847	0.789871	1.57671	0.957772	0.675652	0.870901	0.915003	0.67505	0.960139	0.779326	0.728089	0.653097	0.839876	0.744611	0.882251	0.795873	0.78261	-0.340312	0.656913	-0.0622456	-0.565648	-0.199419	-0.128152	-0.566934	-0.0586846	-0.359701	-0.457813	-0.614631	-0.251752	-0.425442
sp|P78371|TCPB_HUMAN	CCT2	TCPB_HUMAN T-complex protein 1 subunit beta	155	6.60236	6.02109	6.06015	6.45166	6.40171	6.51481	6.42206	5.90632	5.69918	6.13544	6.55029	6.32523	6.30469	6.2297	6.19048	6.18484	6.28381	1.05069	0.95819	0.964406	1.02671	1.01876	1.03676	1.022	0.939926	0.906962	0.976388	1.04241	1.00659	1.00332	0.991388	0.985147	0.984249	0.0713411	-0.061616	-0.0522872	0.0380297	0.0268166	0.0520824	0.0313954	-0.0893812	-0.140886	-0.0344739	0.0599181	0.00947723	0.00478473
sp|P61764-2|STXB1_HUMAN	STXBP1	STXB1_HUMAN Isoform 2 of Syntaxin-binding protein 1	17	6.59554	6.5753	6.62911	6.44077	6.28631	5.26807	6.39989	5.93781	6.56949	6.38804	6.20078	6.05658	6.62154	5.72984	6.35064	5.95028	6.56018	1.00539	1.0023	1.01051	0.981798	0.958253	0.803037	0.975566	0.905129	1.00142	0.97376	0.945215	0.923234	1.00935	0.873427	0.968059	0.90703	0.00775538	0.00332132	0.0150798	-0.0265022	-0.061522	-0.316461	-0.0356883	-0.143804	0.00204598	-0.0383621	-0.0812857	-0.115232	0.0134314
sp|P49902|5NTC_HUMAN	NT5C2	5NTC_HUMAN Cytosolic purine 5'-nucleotidase	17	6.91366	6.43883	6.08551	6.32997	6.47301	6.57828	6.78835	3.68967	5.84647	6.57934	6.74478	6.41711	6.35288	6.24012	6.31659	6.20544	6.44199	1.07322	0.999509	0.944663	0.982611	1.00481	1.02116	1.05377	0.572753	0.907556	1.02132	1.047	0.996137	0.986167	0.968663	0.980534	0.96328	0.101943	-0.000708421	-0.0821288	-0.0253083	0.00692975	0.0302034	0.075554	-0.804015	-0.139941	0.0304359	0.0662644	-0.00558327	-0.0200962
sp|Q2TAY7|SMU1_HUMAN	SMU1	SMU1_HUMAN WD40 repeat-containing protein SMU1	29	6.20579	6.3488	6.19745	5.87139	6.23672	6.50422	6.10495	6.46128	6.42417	6.22356	5.94727	6.12801	6.07449	6.58794	6.15656	6.5274	6.15586	1.00811	1.03134	1.00676	0.953789	1.01314	1.05659	0.99173	1.04961	1.04359	1.011	0.966116	0.995476	0.986782	1.07019	1.00011	1.06036	0.011655	0.0445241	0.00971489	-0.0682577	0.0188277	0.0794162	-0.0119804	0.0698602	0.0615502	0.0157802	-0.0497323	-0.00654118	-0.0191965
sp|Q8IYB8|SUV3_HUMAN	SUPV3L1	SUV3_HUMAN ATP-dependent RNA helicase SUPV3L1, mitochondrial	41	6.34963	6.44153	6.69754	6.47635	6.15325	5.84579	6.32897	6.02123	6.23503	5.94241	6.37114	6.24812	6.31764	6.09752	6.29134	6.1825	6.49126	0.978181	0.992339	1.03178	0.997703	0.947928	0.900563	0.974998	0.92759	0.960527	0.915447	0.981495	0.962543	0.973253	0.939343	0.969201	0.952434	-0.0318266	-0.0110957	0.0451322	-0.00331814	-0.0771505	-0.151101	-0.0365284	-0.108441	-0.0581026	-0.127451	-0.0269476	-0.0550769	-0.0391134
sp|Q92804|RBP56_HUMAN	TAF15	RBP56_HUMAN TATA-binding protein-associated factor 2N	25	6.21916	5.67791	6.35926	6.00188	5.90924	6.58114	5.65645	7.09463	6.2151	5.92248	5.59347	6.31734	6.48757	6.67509	6.59275	6.6965	6.06455	1.02549	0.936246	1.0486	0.989666	0.97439	1.08518	0.932707	1.16985	1.02482	0.976573	0.922322	1.04168	1.06975	1.10067	1.0871	1.1042	0.0363185	-0.0950412	0.0684577	-0.0149867	-0.0374286	0.117936	-0.100504	0.226326	0.0353764	-0.0341998	-0.116658	0.058916	0.097277
sp|P35637|FUS_HUMAN	FUS	FUS_HUMAN RNA-binding protein FUS	16	5.88054	5.59271	5.71054	6.32399	6.03382	7.3178	5.61683	6.98111	6.21035	5.99864	5.92079	6.56079	6.24713	6.48968	6.56113	6.55415	5.87695	1.00061	0.951636	0.971685	1.07607	1.02669	1.24517	0.95574	1.18788	1.05673	1.02071	1.00746	1.11636	1.06299	1.10426	1.11642	1.11523	0.000882245	-0.0715189	-0.0414392	0.105769	0.0380053	0.316344	-0.0653103	0.24839	0.0796082	0.0295691	0.0107233	0.158803	0.0881272
sp|B5MCY1|TDR15_HUMAN	TDRD15	TDR15_HUMAN Tudor domain-containing protein 15	3	6.11988	5.20569	5.04905	5.87056	5.78284	5.06472	7.34001	6.37198	6.33948	5.90436	5.55863	4.66024	4.9907	15.8991	5.19315	4.64961	5.5613	1.10044	0.936057	0.907891	1.05561	1.03984	0.910709	1.31984	1.14577	1.13993	1.06169	0.999521	0.837977	0.897399	2.85888	0.933802	0.836066	0.138082	-0.0953315	-0.139409	0.0780773	0.0563573	-0.134938	0.400361	0.196321	0.188944	0.0863598	-0.000691512	-0.255017	-0.156179
sp|Q9UHB9|SRP68_HUMAN	SRP68	SRP68_HUMAN Signal recognition particle subunit SRP68	56	6.18774	6.30354	6.54771	6.13458	6.37718	5.82201	5.97585	6.19883	6.71484	6.32516	6.15121	6.08454	6.43916	6.24358	6.43549	6.05858	6.29339	0.983212	1.00161	1.04041	0.974765	1.01331	0.925099	0.949544	0.984974	1.06697	1.00505	0.977408	0.966814	1.02316	0.992085	1.02258	0.962689	-0.0244253	0.00232434	0.0571525	-0.0368733	0.0190807	-0.112321	-0.074694	-0.021842	0.0935151	0.00726405	-0.0329677	-0.0486897	0.0330346
sp|Q8NB49|AT11C_HUMAN	ATP11C	AT11C_HUMAN Probable phospholipid-transporting ATPase IG	23	6.52435	5.99688	5.91287	6.34651	6.27396	6.74731	6.37692	6.22194	5.78888	6.10642	6.72317	6.70261	6.24358	6.04236	5.95236	6.03987	6.19515	1.05314	0.967996	0.954435	1.02443	1.01272	1.08913	1.02934	1.00432	0.934421	0.985677	1.08523	1.08191	1.00782	0.975337	0.960809	0.974935	0.0746944	-0.0469277	-0.0672812	0.0348237	0.0182365	0.123173	0.04172	0.00622469	-0.0978555	-0.020813	0.118002	0.113583	0.0112337
sp|Q9Y2G3|AT11B_HUMAN	ATP11B	AT11B_HUMAN Probable phospholipid-transporting ATPase IF	20	6.40246	5.97088	5.67301	6.17255	6.02497	7.11994	6.3624	6.37463	5.9783	6.51434	6.85215	6.58154	6.19213	6.11737	5.78856	5.87476	6.05472	1.05743	0.986152	0.936956	1.01946	0.995086	1.17593	1.05082	1.05284	0.987378	1.07591	1.1317	1.08701	1.02269	1.01035	0.95604	0.970277	0.0805649	-0.0201179	-0.093947	0.0278052	-0.00710738	0.233804	0.0715096	0.0742802	-0.0183261	0.105558	0.178495	0.120364	0.0323743
sp|P98196|AT11A_HUMAN	ATP11A	AT11A_HUMAN Probable phospholipid-transporting ATPase IH	6	6.19908	6.36612	5.69	6.15719	6.71242	6.88554	6.25273	5.79755	5.98604	6.527	7.07768	6.25993	5.6431	6.0709	5.69851	6.67622	6.1031	1.01573	1.0431	0.932313	1.00886	1.09984	1.1282	1.02452	0.949936	0.98082	1.06946	1.15969	1.0257	0.924629	0.994724	0.933708	1.09391	0.0225125	0.0608727	-0.101113	0.0127304	0.137291	0.174028	0.0349446	-0.0740983	-0.0279397	0.0968784	0.213735	0.0366049	-0.113054
sp|Q9UGY1|NOL12_HUMAN	NOL12	NOL12_HUMAN Nucleolar protein 12	7	6.06693	6.35995	7.04345	5.94854	6.72638	6.77434	5.58013	6.61337	6.56744	5.95945	5.47659	5.65147	5.83328	6.69257	6.3359	6.37021	6.35472	0.954713	1.00082	1.10838	0.936083	1.05849	1.06603	0.878108	1.0407	1.03347	0.937799	0.861815	0.889335	0.917945	1.05317	0.997039	1.00244	-0.0668613	0.00118743	0.148454	-0.0952924	0.0820023	0.0922524	-0.187529	0.0575576	0.0475031	-0.0926488	-0.21455	-0.169202	-0.123521
sp|Q96RK4-2|BBS4_HUMAN	BBS4	BBS4_HUMAN Isoform 2 of Bardet-Biedl syndrome 4 protein	3	5.07414	6.64869	6.72779	6.44511	5.7456	5.76015	5.87904	5.65873	7.49233	5.7193	5.96008	5.43277	6.24433	6.68894	6.34983	8.17316	6.22393	0.815263	1.06825	1.08095	1.03554	0.923146	0.925484	0.944586	0.909189	1.20379	0.918921	0.957607	0.872884	1.00328	1.07471	1.02023	1.31318	-0.294663	0.0952437	0.112306	0.0503786	-0.115369	-0.11172	-0.0822458	-0.137348	0.267588	-0.121988	-0.0624947	-0.196138	0.00472037
sp|Q86WT1|TT30A_HUMAN	TTC30A	TT30A_HUMAN Tetratricopeptide repeat protein 30A	2	6.56644	6.90183	6.68973	7.42607	5.25038	5.20764	5.42107	6.2818	5.80074	6.43672	7.1506	7.14304	5.38571	4.93577	5.89656	7.50592	6.89602	0.952208	1.00084	0.970086	1.07686	0.761364	0.755166	0.786116	0.910932	0.841172	0.933397	1.03692	1.03582	0.780988	0.715742	0.855067	1.08844	-0.070652	0.0012155	-0.0438155	0.106835	-0.393342	-0.405134	-0.347186	-0.134585	-0.249526	-0.0994377	0.0523009	0.0507748	-0.356627
sp|P07741|APT_HUMAN	APRT	APT_HUMAN Adenine phosphoribosyltransferase	21	6.24052	6.12174	5.76806	6.39556	5.63409	6.50647	7.045	6.12267	5.72659	6.15904	6.67401	6.59002	6.29288	6.31549	6.22001	6.18783	6.13147	1.01779	0.998413	0.94073	1.04307	0.918881	1.06116	1.14899	0.998565	0.933967	1.0045	1.08848	1.07479	1.02632	1.03001	1.01444	1.00919	0.0254333	-0.00229122	-0.0881468	0.0608377	-0.12205	0.085642	0.200367	-0.00207207	-0.0985567	0.0064725	0.122321	0.10405	0.0374874
sp|Q9Y2W6|TDRKH_HUMAN	TDRKH	TDRKH_HUMAN Tudor and KH domain-containing protein	12	6.31842	6.40996	5.99853	6.46331	6.24339	5.84429	6.52498	6.44776	6.43484	6.1806	6.29769	5.83211	6.29485	6.89792	5.91294	5.89841	6.29756	1.00331	1.01785	0.952517	1.02632	0.991399	0.928025	1.03611	1.02385	1.0218	0.981429	1.00002	0.926091	0.99957	1.09533	0.938926	0.936619	0.00477202	0.0255235	-0.0701828	0.0374814	-0.0124622	-0.107764	0.0511817	0.0340062	0.0311125	-0.0270449	3.09266e-05	-0.110774	-0.000619816
sp|Q7Z6B0|CCD91_HUMAN	CCDC91	CCD91_HUMAN Coiled-coil domain-containing protein 91	14	6.45272	6.19563	6.2956	6.04815	6.52529	6.02016	6.2407	6.32819	6.45035	6.28475	6.52665	6.18787	6.3056	6.21077	5.95351	5.97405	6.24803	1.03276	0.991614	1.00761	0.96801	1.04438	0.96353	0.998828	1.01283	1.03238	1.00588	1.04459	0.990372	1.00921	0.994037	0.952863	0.95615	0.0465072	-0.0121492	0.0109437	-0.0469063	0.0626418	-0.0535984	-0.00169237	0.0183927	0.0459772	0.00845513	0.0629424	-0.0139573	0.0132334
sp|P35232|PHB_HUMAN	PHB	PHB_HUMAN Prohibitin	52	4.98379	5.94879	5.18739	6.43162	3.72692	7.09831	7.18506	6.88111	6.08636	6.95634	5.93156	7.18899	6.21264	6.843	6.67303	6.6651	5.6379	0.88398	1.05514	0.920093	1.14078	0.661048	1.25903	1.27442	1.22051	1.07954	1.23385	1.05209	1.27512	1.10194	1.21375	1.1836	1.1822	-0.177914	0.077439	-0.120148	0.190025	-0.597173	0.332318	0.349843	0.287484	0.110422	0.303171	0.0732543	0.350632	0.140049
sp|Q16401|PSMD5_HUMAN	PSMD5	PSMD5_HUMAN 26S proteasome non-ATPase regulatory subunit 5	58	6.54043	6.25026	6.14987	6.235	6.44361	6.32813	6.28235	5.81543	5.96168	6.1383	6.73692	6.38329	6.23532	6.10939	6.2814	6.1086	6.29389	1.03917	0.993068	0.977117	0.990643	1.02379	1.00544	0.998166	0.92398	0.947217	0.975279	1.07039	1.0142	0.990694	0.970686	0.998016	0.97056	0.0554335	-0.0100358	-0.0333961	-0.0135624	0.0339172	0.00782727	-0.00264764	-0.114066	-0.078233	-0.0361128	0.0981372	0.0203482	-0.0134884
sp|Q15075|EEA1_HUMAN	EEA1	EEA1_HUMAN Early endosome antigen 1	77	6.38816	5.94569	5.94651	6.38732	6.1139	6.61916	6.45355	6.83923	5.72192	6.28482	6.50192	6.57082	6.06539	6.09326	5.96582	6.10253	6.16692	1.03588	0.964126	0.964259	1.03574	0.991403	1.07333	1.04648	1.10902	0.927841	1.01912	1.05432	1.06549	0.983536	0.988056	0.967391	0.989559	0.0508503	-0.0527059	-0.0525069	0.0506606	-0.0124572	0.102098	0.0655429	0.149284	-0.108051	0.0273213	0.0763157	0.0915233	-0.0239497
sp|Q6YHU6|THADA_HUMAN	THADA	THADA_HUMAN Thyroid adenoma-associated protein	47	6.19473	6.4639	6.1673	6.81756	6.4471	5.60345	6.47748	6.02846	6.33512	6.36908	6.27964	6.1206	6.26461	6.39217	6.07797	5.96083	6.41087	0.966285	1.00827	0.962006	1.06344	1.00565	0.874054	1.01039	0.940349	0.988184	0.993481	0.97953	0.954722	0.977185	0.997083	0.948072	0.9298	-0.0494793	0.0118842	-0.0558817	0.0887348	0.00812964	-0.194205	0.0149119	-0.0887312	-0.0171488	-0.00943572	-0.0298389	-0.0668476	-0.033296
sp|O14744|ANM5_HUMAN	PRMT5	ANM5_HUMAN Protein arginine N-methyltransferase 5	52	6.68488	6.0706	5.90689	6.05268	6.60036	6.40922	6.26516	5.86939	5.94442	6.22045	6.55884	6.37964	6.21588	6.37312	6.16049	6.28797	6.17876	1.08191	0.982494	0.955999	0.979594	1.06823	1.0373	1.01398	0.94993	0.962073	1.00675	1.06151	1.03251	1.00601	1.03146	0.997043	1.01767	0.113584	-0.0254788	-0.0649192	-0.0297438	0.0952268	0.0528309	0.0200334	-0.0741073	-0.0557819	0.00970103	0.0861228	0.0461571	0.00864073
sp|Q8IUD2|RB6I2_HUMAN	ERC1	RB6I2_HUMAN ELKS/Rab6-interacting/CAST family member 1	30	6.14496	6.24013	6.19482	6.05609	5.86603	5.80011	6.51201	6.84417	6.63417	6.33994	6.49997	6.22454	6.20101	6.21903	6.17269	6.05034	6.159	0.99772	1.01317	1.00582	0.983291	0.952432	0.941729	1.05732	1.11125	1.07715	1.02938	1.05536	1.01064	1.00682	1.00975	1.00222	0.982358	-0.00329251	0.01888	0.00836624	-0.0243095	-0.0703117	-0.0866159	0.0804068	0.152179	0.10722	0.0417731	0.0777369	0.0152711	0.00980709
sp|Q12980|NPRL3_HUMAN	NPRL3	NPRL3_HUMAN Nitrogen permease regulator 3-like protein	4	6.1823	6.29935	4.93612	5.70578	5.94558	6.14627	5.8186	6.8655	7.1385	6.722	6.43202	6.47226	5.76122	7.52215	6.14717	5.90519	5.78089	1.06944	1.08969	0.853869	0.987008	1.02849	1.06321	1.00652	1.18762	1.23484	1.1628	1.11264	1.1196	0.996598	1.30121	1.06336	1.0215	0.0968527	0.123912	-0.227914	-0.0188669	0.0405266	0.0884201	0.00938107	0.248074	0.30433	0.2176	0.153981	0.162979	-0.00491665
sp|Q9NQG6|MID51_HUMAN	MIEF1	MID51_HUMAN Mitochondrial dynamics protein MID51	14	6.41396	6.02902	6.0593	6.46076	6.28878	6.15402	6.6401	5.90104	5.91863	6.38133	6.65086	6.45768	6.28395	6.13319	6.14053	6.08685	6.24076	1.02775	0.966071	0.970923	1.03525	1.00769	0.986101	1.06399	0.945564	0.948383	1.02252	1.06571	1.03476	1.00692	0.982763	0.983939	0.975338	0.0394936	-0.0497982	-0.0425706	0.0499822	0.0110584	-0.0201926	0.0894832	-0.0807525	-0.0764585	0.0321354	0.0918192	0.0492942	0.00994997
sp|Q6TFL4|KLH24_HUMAN	KLHL24	KLH24_HUMAN Kelch-like protein 24	2	5.7473	6.91319	6.88932	6.09025	5.44073	5.0294	5.87037	6.84264	6.26718	5.9802	6.89195	6.29952	6.15224	7.19844	6.11002	6.27725	6.41002	0.896613	1.0785	1.07477	0.950115	0.848786	0.784616	0.915812	1.06749	0.977717	0.932946	1.07518	0.982762	0.959786	1.123	0.953199	0.979288	-0.157443	0.109024	0.104034	-0.0738263	-0.236527	-0.349941	-0.126876	0.0942253	-0.0325113	-0.100134	0.104585	-0.0250858	-0.0592159
sp|Q96I25|SPF45_HUMAN	RBM17	SPF45_HUMAN Splicing factor 45	25	5.88753	6.08937	6.38684	6.16111	6.34546	5.66616	6.22642	6.37279	6.54141	6.20344	6.00592	6.21849	6.34653	6.66167	6.30647	6.58037	6.13121	0.960255	0.993175	1.04169	1.00488	1.03494	0.92415	1.01553	1.0394	1.0669	1.01178	0.979565	1.01423	1.03512	1.08652	1.02858	1.07326	-0.0585099	-0.00987943	0.0589299	0.00701789	0.0495523	-0.113801	0.0222305	0.0557527	0.0934292	0.016896	-0.0297871	0.0203919	0.0497956
sp|O43663|PRC1_HUMAN	PRC1	PRC1_HUMAN Protein regulator of cytokinesis 1	16	5.85943	6.42994	7.20726	6.41011	5.99389	5.40275	5.66183	6.49036	7.05818	6.01523	6.03063	6.06937	6.14925	6.47804	6.21678	6.52693	6.47668	0.904696	0.992783	1.1128	0.989721	0.925456	0.834184	0.874186	1.00211	1.08978	0.928751	0.931129	0.937111	0.949444	1.00021	0.959871	1.00776	-0.144495	-0.0104503	0.154195	-0.0149065	-0.111763	-0.261562	-0.193987	0.00304292	0.124041	-0.106636	-0.102947	-0.0937088	-0.0748451
sp|P04114|APOB_HUMAN	APOB	APOB_HUMAN Apolipoprotein B-100	25	6.78533	6.2091	6.39145	6.60586	5.90076	6.71691	6.3762	6.37502	6.21386	7.08227	7.06961	7.30708	5.32491	5.41999	5.10487	5.11678	6.49794	1.04423	0.95555	0.983612	1.01661	0.908098	1.0337	0.981266	0.981084	0.956282	1.08993	1.08798	1.12452	0.819477	0.83411	0.785614	0.787447	0.0624377	-0.0655971	-0.023838	0.0237651	-0.139081	0.0478164	-0.0272844	-0.0275514	-0.0644916	0.124231	0.121649	0.169314	-0.287224
sp|Q9BY43|CHM4A_HUMAN	CHMP4A	CHM4A_HUMAN Charged multivesicular body protein 4a	23	6.57607	5.98641	5.7958	6.19797	6.13387	6.68179	6.50435	6.4787	5.69573	6.35976	6.54988	6.41314	6.29553	6.1621	6.03031	6.13859	6.13906	1.07118	0.975134	0.944086	1.0096	0.999154	1.08841	1.0595	1.05532	0.927785	1.03595	1.06692	1.04464	1.02549	1.00375	0.982285	0.999923	0.0992073	-0.0363273	-0.0830105	0.0137774	-0.00122077	0.122216	0.0833865	0.077686	-0.108138	0.050954	0.0934501	0.0630125	0.0363095
tr|E9PSI1|E9PSI1_HUMAN	TM9SF1	E9PSI1_HUMAN Transmembrane 9 superfamily member 1	6	6.18578	6.16254	6.4003	6.3014	6.17925	5.97324	6.41682	6.12426	6.18994	6.42676	6.36525	6.44563	6.29238	6.424	6.11423	5.99822	6.26251	0.987749	0.984038	1.022	1.00621	0.986706	0.95381	1.02464	0.977925	0.988413	1.02623	1.01641	1.02924	1.00477	1.02579	0.976323	0.957799	-0.0177843	-0.0232147	0.0313997	0.00893254	-0.0193081	-0.0682262	0.0351187	-0.0322043	-0.0168144	0.0373517	0.0234773	0.0415815	0.00686595
sp|Q9UPN4|AZI1_HUMAN	AZI1	AZI1_HUMAN 5-azacytidine-induced protein 1	22	4.67765	7.45171	7.72552	5.05736	6.13977	5.33068	4.59851	6.13856	9.16379	5.95058	5.4129	4.67493	6.24282	7.38652	7.23027	6.81843	6.22806	0.751061	1.19647	1.24044	0.812028	0.985824	0.855913	0.738354	0.98563	1.47137	0.955447	0.869115	0.750624	1.00237	1.18601	1.16092	1.09479	-0.412999	0.258789	0.310849	-0.300398	-0.0205982	-0.224463	-0.437616	-0.0208826	0.557162	-0.0657525	-0.202381	-0.413838	0.00341503
sp|Q70CQ2|UBP34_HUMAN	USP34	UBP34_HUMAN Ubiquitin carboxyl-terminal hydrolase 34	52	6.12478	6.10215	6.07878	6.62787	6.0427	5.68687	6.35045	6.58836	6.36039	6.41338	6.61213	6.58602	6.16583	6.19515	6.01685	6.04828	6.23339	0.982575	0.978945	0.975196	1.06328	0.969408	0.912323	1.01878	1.05695	1.02037	1.02887	1.06076	1.05657	0.989161	0.993864	0.965261	0.970303	-0.0253601	-0.0307005	-0.0362363	0.0885272	-0.0448248	-0.132383	0.0268407	0.0799013	0.0290971	0.0410668	0.085097	0.0793888	-0.015723
sp|P19827|ITIH1_HUMAN	ITIH1	ITIH1_HUMAN Inter-alpha-trypsin inhibitor heavy chain H1	1	5.38514	6.82041	6.71634	8.50655	4.3394	8.68393	5.83898	8.18076	3.88014	6.34776	6.72203	7.573	5.53754	5.8161	4.15432	5.4976	6.85711	0.785337	0.994648	0.979471	1.24054	0.632832	1.26641	0.851522	1.19303	0.565856	0.925719	0.980301	1.1044	0.807562	0.848185	0.605841	0.801737	-0.348617	-0.0077422	-0.0299254	0.310973	-0.660105	0.340747	-0.231884	0.254634	-0.821492	-0.111353	-0.0287037	0.143264	-0.308355
sp|Q7Z3J2|CP062_HUMAN	C16orf62	CP062_HUMAN UPF0505 protein C16orf62	23	6.08447	6.18376	6.27403	6.39712	6.12952	5.75046	6.36974	6.04674	6.63732	6.4304	6.42148	6.7664	6.19382	6.24681	6.04808	6.01983	6.23484	0.975882	0.991807	1.00628	1.02603	0.983107	0.92231	1.02164	0.96983	1.06455	1.03136	1.02993	1.08526	0.99342	1.00192	0.970045	0.965514	-0.0352221	-0.0118694	0.00903873	0.0370689	-0.0245796	-0.116676	0.0308808	-0.0441961	0.0902471	0.0445548	0.0425521	0.118035	-0.00952424
sp|O95747|OXSR1_HUMAN	OXSR1	OXSR1_HUMAN Serine/threonine-protein kinase OSR1	35	6.17982	6.33241	6.57842	6.12363	6.4271	6.14569	6.26077	5.77481	6.29247	6.35291	6.48015	6.43432	6.37943	5.92219	6.3046	6.01129	6.30357	0.980368	1.00458	1.0436	0.971454	1.0196	0.974954	0.99321	0.916117	0.998239	1.00783	1.02801	1.02074	1.01203	0.939498	1.00016	0.953633	-0.0286043	0.00658554	0.061572	-0.041782	0.0279988	-0.0365941	-0.00982902	-0.126396	-0.00254269	0.0112485	0.0398581	0.0296186	0.0172584
sp|Q9UNX4|WDR3_HUMAN	WDR3	WDR3_HUMAN WD repeat-containing protein 3	31	5.43074	6.82815	7.07646	5.22383	6.08857	5.47132	4.97028	7.32113	8.41969	5.74741	5.00069	5.38493	6.24153	7.03626	6.44988	7.30912	6.1398	0.884515	1.11211	1.15256	0.850815	0.991657	0.891124	0.809519	1.19241	1.37133	0.936092	0.814472	0.877054	1.01657	1.14601	1.0505	1.19045	-0.177042	0.153304	0.204837	-0.233083	-0.0120871	-0.166302	-0.304863	0.253876	0.455577	-0.0952785	-0.296063	-0.189263	0.0237092
sp|Q969Q5|RAB24_HUMAN	RAB24	RAB24_HUMAN Ras-related protein Rab-24	13	6.03299	6.09493	5.93746	6.28232	5.98615	7.03499	5.97731	6.30233	6.28783	6.53735	6.41519	6.70319	6.0113	6.12773	6.18769	6.08125	6.08692	0.991139	1.00132	0.975445	1.0321	0.983444	1.15575	0.981992	1.03539	1.03301	1.074	1.05393	1.10124	0.987576	1.0067	1.01655	0.999068	-0.0128404	0.00189606	-0.0358677	0.0455838	-0.0240852	0.208835	-0.0262172	0.0501717	0.0468486	0.102992	0.0757784	0.139134	-0.0180366
sp|O43567|RNF13_HUMAN	RNF13	RNF13_HUMAN E3 ubiquitin-protein ligase RNF13	1	6.03292	6.34792	6.74483	7.15621	5.60778	6.11771	6.76497	5.65676	5.59674	6.21356	6.56098	6.76156	5.80167	5.81105	6.372	6.45333	6.57047	0.918187	0.966129	1.02654	1.08915	0.853482	0.931092	1.0296	0.860937	0.851802	0.94568	0.998556	1.02908	0.882992	0.884419	0.969794	0.982172	-0.12314	-0.0497126	0.0377855	0.123199	-0.228567	-0.103005	0.042087	-0.216021	-0.23141	-0.0805765	-0.00208525	0.0413596	-0.179528
sp|Q7Z417|NUFP2_HUMAN	NUFIP2	NUFP2_HUMAN Nuclear fragile X mental retardation-interacting protein 2	33	5.98341	6.34175	6.79886	5.65802	6.08057	6.34121	5.49825	6.56259	7.31045	5.88666	5.37275	6.0359	6.51195	6.87584	6.47375	6.26804	6.19551	0.965766	1.0236	1.09739	0.913245	0.981448	1.02352	0.887457	1.05925	1.17996	0.950149	0.867201	0.974238	1.05108	1.10981	1.04491	1.01171	-0.0502551	0.033658	0.13407	-0.130926	-0.0270165	0.0335351	-0.172251	0.0830423	0.238737	-0.0737737	-0.205562	-0.0376541	0.0718666
sp|Q8N2G8|GHDC_HUMAN	GHDC	GHDC_HUMAN GH3 domain-containing protein	15	6.6164	6.09535	5.83478	6.14777	6.14654	6.64566	6.7305	5.95307	5.7338	6.55705	6.46841	6.53468	5.92195	6.25892	6.22123	6.13389	6.17357	1.07173	0.987329	0.945122	0.99582	0.995621	1.07647	1.09021	0.964282	0.928765	1.06212	1.04776	1.05849	0.959242	1.01382	1.00772	0.993572	0.0999403	-0.0183971	-0.0814279	-0.00604298	-0.00633165	0.106306	0.124608	-0.0524723	-0.106615	0.0869407	0.067305	0.0820104	-0.0600339
sp|Q69YQ0|CYTSA_HUMAN	SPECC1L	CYTSA_HUMAN Cytospin-A	11	5.67641	6.30828	6.81285	6.83252	5.90153	5.48457	6.26034	7.41453	6.16976	6.0244	6.12703	6.63637	6.12117	6.19188	5.90335	6.13501	6.40752	0.885899	0.984513	1.06326	1.06633	0.921033	0.855959	0.977031	1.15716	0.962894	0.940208	0.956226	1.03572	0.955311	0.966347	0.921317	0.957471	-0.174786	-0.0225183	0.0884935	0.0926528	-0.118676	-0.224386	-0.0335239	0.21059	-0.0545506	-0.0889474	-0.064577	0.0506294	-0.0659575
sp|Q9HA77|SYCM_HUMAN	CARS2	SYCM_HUMAN Probable cysteine--tRNA ligase, mitochondrial	9	6.22042	6.41511	6.32994	6.64653	6.16031	6.32374	6.96345	5.67196	5.61174	6.33404	6.541	6.56734	5.87805	5.96926	5.8926	6.4745	6.403	0.971485	1.00189	0.98859	1.03803	0.962097	0.987621	1.08753	0.885829	0.876424	0.98923	1.02155	1.02567	0.918015	0.93226	0.920287	1.01117	-0.041736	0.00272599	-0.0165562	0.0538533	-0.0557451	-0.01797	0.121054	-0.174901	-0.1903	-0.015622	0.0307632	0.0365611	-0.12341
sp|Q9H1K1|ISCU_HUMAN	ISCU	ISCU_HUMAN Iron-sulfur cluster assembly enzyme ISCU, mitochondrial	5	6.51529	5.8891	5.72347	6.5983	6.02741	8.20929	6.67612	6.95512	5.15851	6.16228	5.92547	5.99901	5.84388	7.39395	5.45062	5.47217	6.18154	1.05399	0.952691	0.925897	1.06742	0.975066	1.32803	1.08001	1.12514	0.834502	0.996884	0.958575	0.970472	0.945376	1.19613	0.881758	0.885244	0.0758631	-0.0699191	-0.111076	0.0941281	-0.0364281	0.409291	0.111044	0.170109	-0.261012	-0.00450206	-0.0610367	-0.0432419	-0.0810397
sp|Q8TD31-2|CCHCR_HUMAN	CCHCR1	CCHCR_HUMAN Isoform 2 of Coiled-coil alpha-helical rod protein 1	7	5.82428	6.05272	6.76994	6.42608	6.24443	5.73278	6.16903	5.97772	6.50291	6.10612	6.54304	6.28905	6.51147	6.22884	6.28757	6.33403	6.26825	0.929171	0.965615	1.08004	1.02518	0.996199	0.914574	0.98417	0.95365	1.03744	0.974134	1.04384	1.00332	1.0388	0.993712	1.00308	1.01049	-0.105984	-0.0504803	0.111079	0.0358751	-0.00549398	-0.128829	-0.0230202	-0.0684685	0.0530216	-0.0378079	0.0618972	0.00477823	0.0549194
sp|P38935|SMBP2_HUMAN	IGHMBP2	SMBP2_HUMAN DNA-binding protein SMUBP-2	10	5.42033	6.6796	7.71405	6.07265	6.23031	5.79695	5.16808	5.57782	7.04179	6.05177	5.57804	6.10914	6.29996	6.88097	6.48598	6.89256	6.47166	0.837549	1.03213	1.19197	0.938345	0.962707	0.895744	0.798571	0.861884	1.0881	0.935119	0.861918	0.943984	0.973469	1.06325	1.00221	1.06504	-0.255755	0.0456265	0.253353	-0.091809	-0.0548313	-0.158841	-0.324507	-0.214434	0.121807	-0.0967781	-0.214377	-0.083166	-0.0387926
sp|O00151|PDLI1_HUMAN	PDLIM1	PDLI1_HUMAN PDZ and LIM domain protein 1	45	6.3961	5.79709	6.0646	6.51441	6.29591	6.32455	6.78932	6.28006	5.74964	6.16973	6.63208	6.44008	6.30813	6.04978	6.13084	6.05768	6.19305	1.03279	0.936064	0.979259	1.05189	1.01661	1.02123	1.09628	1.01405	0.928402	0.996234	1.07089	1.03989	1.01858	0.976866	0.989955	0.978142	0.0465424	-0.0953212	-0.0302376	0.0729844	0.0237648	0.0303127	0.132617	0.0201282	-0.107178	-0.00544274	0.0988113	0.0564285	0.0265623
sp|Q13428-3|TCOF_HUMAN	TCOF1	TCOF_HUMAN Isoform 3 of Treacle protein	110	6.77177	6.21908	6.27511	6.02663	6.58911	7.08467	6.27384	6.32739	6.23551	5.99873	6.00327	5.90732	6.07032	5.93253	6.19745	6.08727	6.32315	1.07095	0.983542	0.992403	0.953106	1.04206	1.12043	0.992202	1.00067	0.98614	0.948694	0.949412	0.934237	0.960016	0.938224	0.980121	0.962696	0.0988901	-0.0239417	-0.0110021	-0.0692914	0.0594407	0.164058	-0.0112941	0.000967648	-0.0201353	-0.0759858	-0.0748943	-0.0981391	-0.0588703
sp|Q13428-7|TCOF_HUMAN	TCOF1	TCOF_HUMAN Isoform 7 of Treacle protein	1	6.17113	5.16359	5.81971	6.13076	5.54124	6.61945	6.69077	6.4311	6.50721	6.70322	5.04797	6.27531	6.57089	7.15064	6.98399	6.19302	5.8213	1.0601	0.887017	0.999727	1.05316	0.951891	1.13711	1.14936	1.10475	1.11783	1.1515	0.867155	1.07799	1.12877	1.22836	1.19973	1.06386	0.0841939	-0.172966	-0.000393485	0.0747252	-0.0711319	0.185371	0.200832	0.143725	0.160698	0.203514	-0.205637	0.108346	0.174748
sp|Q9NWZ5|UCKL1_HUMAN	UCKL1	UCKL1_HUMAN Uridine-cytidine kinase-like 1	11	5.91715	6.20045	6.06345	6.17112	5.90297	6.03536	6.40685	6.42357	6.1255	6.68125	6.7261	6.5595	6.45533	5.99071	6.132	6.20868	6.08804	0.97193	1.01846	0.995961	1.01365	0.969601	0.991347	1.05237	1.05511	1.00615	1.09744	1.10481	1.07744	1.06033	0.984013	1.00722	1.01982	-0.041076	0.0263945	-0.00583953	0.0195539	-0.0445374	-0.0125386	0.0736368	0.0773969	0.00884918	0.13414	0.143792	0.107607	0.0845124
sp|P20248|CCNA2_HUMAN	CCNA2	CCNA2_HUMAN Cyclin-A2	29	6.66918	5.93314	5.95351	6.26316	6.25772	6.91376	6.62469	6.1985	5.73272	6.31719	6.49462	6.14152	6.08707	6.35933	6.08695	5.96694	6.20475	1.07485	0.956226	0.959509	1.00941	1.00854	1.11427	1.06768	0.998993	0.923925	1.01812	1.04672	0.98981	0.981034	1.02491	0.981015	0.961673	0.104137	-0.0645767	-0.059632	0.0135182	0.0122646	0.156098	0.0944804	-0.00145337	-0.114153	0.0259105	0.0658726	-0.0147767	-0.0276245
sp|P54920|SNAA_HUMAN	NAPA	SNAA_HUMAN Alpha-soluble NSF attachment protein	33	6.65291	6.04304	6.40645	6.36803	6.30414	6.25788	6.37554	6.01363	5.9135	6.07947	6.66735	6.45924	6.04603	6.01634	6.32722	6.06922	6.36761	1.04481	0.949028	1.0061	1.00007	0.990033	0.982768	1.00125	0.94441	0.928685	0.954749	1.04707	1.01439	0.949498	0.944835	0.993657	0.95314	0.0632341	-0.0754769	0.00877373	9.57217e-05	-0.0144518	-0.0250774	0.00179613	-0.0825153	-0.106739	-0.0668059	0.0663621	0.020613	-0.0747633
sp|Q9H115|SNAB_HUMAN	NAPB	SNAB_HUMAN Beta-soluble NSF attachment protein	5	5.89741	5.58249	6.62584	7.4146	6.04373	5.6793	6.77534	5.98424	5.66458	6.4872	6.65313	7.20694	5.90947	5.84113	5.92023	6.31439	6.38009	0.924347	0.874987	1.03852	1.16215	0.94728	0.890161	1.06195	0.937956	0.887853	1.01679	1.0428	1.1296	0.926237	0.915525	0.927923	0.989703	-0.113494	-0.192667	0.0545277	0.216793	-0.0781364	-0.167863	0.0867177	-0.0924076	-0.171607	0.0240203	0.0604576	0.175811	-0.110547
sp|Q9NZC9|SMAL1_HUMAN	SMARCAL1	SMAL1_HUMAN SWI/SNF-related matrix-associated actin-dependent regulator of chromatin subfamily A-like protein 1	19	6.03262	6.12653	6.42166	6.37519	6.16302	5.6151	6.23637	5.82835	6.63839	6.70734	6.45154	6.55642	6.26035	6.25415	6.22618	6.10678	6.239	0.966921	0.981973	1.02928	1.02183	0.987822	0.9	0.999578	0.93418	1.06402	1.07507	1.03407	1.05088	1.00342	1.00243	0.997945	0.978808	-0.0485301	-0.0262446	0.0416315	0.0311535	-0.0176773	-0.152003	-0.000608285	-0.0982273	0.0895186	0.104426	0.0483288	0.0715935	0.00492851
sp|Q68EM7|RHG17_HUMAN	ARHGAP17	RHG17_HUMAN Rho GTPase-activating protein 17	26	6.14768	6.38644	6.76646	7.01107	6.36474	5.44557	6.35434	5.95874	6.14991	6.23938	6.11433	5.97071	6.26065	6.27488	6.20106	6.35402	6.57791	0.934594	0.970892	1.02866	1.06585	0.967593	0.827857	0.966012	0.905871	0.934933	0.948535	0.929524	0.907691	0.951769	0.953932	0.942709	0.965963	-0.0975877	-0.0426179	0.0407714	0.0920048	-0.0475282	-0.272547	-0.0498875	-0.142623	-0.0970645	-0.0762271	-0.105435	-0.139727	-0.0713174
sp|P09417|DHPR_HUMAN	QDPR	DHPR_HUMAN Dihydropteridine reductase	19	6.58097	5.68196	5.78725	5.93976	5.91797	7.12467	6.52116	6.17261	5.81467	6.25596	7.0368	6.53546	6.05239	6.33325	6.26562	5.97949	5.99749	1.09729	0.94739	0.964946	0.990375	0.986742	1.18794	1.08732	1.0292	0.969518	1.0431	1.17329	1.0897	1.00915	1.05598	1.04471	0.997	0.133943	-0.077969	-0.0514797	-0.013953	-0.0192553	0.248466	0.120771	0.041523	-0.0446603	0.0608736	0.230562	0.123931	0.0131473
sp|Q8NFW8|NEUA_HUMAN	CMAS	NEUA_HUMAN N-acylneuraminate cytidylyltransferase	32	6.3308	6.3385	6.9044	5.9327	6.941	6.18153	5.37667	6.04297	6.93157	6.03024	5.4084	5.86049	6.03819	7.05128	6.32032	6.31094	6.3766	0.992817	0.994025	1.08277	0.930386	1.08851	0.969408	0.843188	0.947679	1.08703	0.945683	0.848164	0.919062	0.946929	1.10581	0.991174	0.989703	-0.0103996	-0.00864592	0.114729	-0.104099	0.122356	-0.0448234	-0.246074	-0.0775296	0.120395	-0.080572	-0.237586	-0.121766	-0.0786712
sp|Q86UK7|ZN598_HUMAN	ZNF598	ZN598_HUMAN Zinc finger protein 598	54	6.06647	6.31699	6.4326	6.17206	6.26685	5.75911	6.07553	5.97982	6.88105	6.3463	6.3296	6.23454	6.3634	6.27164	6.3669	6.13714	6.24703	0.971097	1.0112	1.02971	0.987999	1.00317	0.921896	0.972547	0.957226	1.10149	1.01589	1.01322	0.998001	1.01863	1.00394	1.01919	0.982409	-0.0423132	0.0160668	0.0422315	-0.0174184	0.00457	-0.117325	-0.0401602	-0.0630684	0.139458	0.0227453	0.0189439	-0.00288734	0.0266274
sp|P11766|ADHX_HUMAN	ADH5	ADHX_HUMAN Alcohol dehydrogenase class-3	62	6.64718	5.78947	5.91423	6.40898	6.36746	6.58511	6.70367	6.52561	5.58264	6.09487	6.51786	6.28458	6.26913	6.17234	6.11247	6.0244	6.18996	1.07386	0.935299	0.955455	1.03538	1.02867	1.06384	1.08299	1.05422	0.901886	0.984637	1.05297	1.01529	1.01279	0.997153	0.987481	0.973253	0.102811	-0.0965	-0.0657409	0.0501635	0.0407867	0.0892763	0.11502	0.0761815	-0.148984	-0.0223358	0.0744671	0.0218851	0.018334
sp|P46019|KPB2_HUMAN	PHKA2	KPB2_HUMAN Phosphorylase b kinase regulatory subunit alpha, liver isoform	17	5.93614	6.58275	6.49573	6.66548	6.15212	6.08855	6.18223	5.5864	6.22692	6.25637	6.34768	6.94208	6.30207	6.06232	5.91403	6.25912	6.42002	0.924629	1.02535	1.01179	1.03823	0.95827	0.948369	0.96296	0.870152	0.969921	0.974509	0.988731	1.08132	0.981627	0.944283	0.921185	0.974937	-0.113054	0.0361115	0.0169128	0.0541299	-0.0614953	-0.0764802	-0.0544516	-0.20066	-0.0440602	-0.0372531	-0.0163495	0.112789	-0.0267531
sp|P46020|KPB1_HUMAN	PHKA1	KPB1_HUMAN Phosphorylase b kinase regulatory subunit alpha, skeletal muscle isoform	16	5.90407	6.32744	6.44296	6.39415	5.851	5.87935	5.84505	6.19184	6.45367	6.50858	6.30525	6.47019	6.28568	6.38855	6.32388	6.42834	6.26715	0.942065	1.00962	1.02805	1.02026	0.933597	0.938121	0.932648	0.987983	1.02976	1.03852	1.00608	1.0324	1.00296	1.01937	1.00905	1.02572	-0.0861008	0.0138112	0.039913	0.0289419	-0.0991275	-0.092154	-0.100595	-0.0174425	0.0423091	0.0545321	0.0087429	0.0459974	0.00425815
sp|P34897|GLYM_HUMAN	SHMT2	GLYM_HUMAN Serine hydroxymethyltransferase, mitochondrial	104	6.5461	5.99048	6.1028	6.60042	6.07048	6.77342	6.59981	6.30775	5.35913	6.20854	6.53508	6.52634	6.20388	5.8471	6.10262	6.22605	6.30995	1.03743	0.94937	0.967171	1.04603	0.962049	1.07345	1.04594	0.999651	0.849314	0.983929	1.03568	1.03429	0.98319	0.926648	0.967142	0.986704	0.0530071	-0.074957	-0.0481573	0.0649293	-0.055818	0.102256	0.0647959	-0.000503092	-0.23563	-0.0233745	0.0505763	0.0486456	-0.0244578
sp|P34896|GLYC_HUMAN	SHMT1	GLYC_HUMAN Serine hydroxymethyltransferase, cytosolic	25	6.21091	6.26993	6.38696	7.05333	6.28279	6.60807	6.42402	5.87047	5.41364	5.86065	6.79829	6.59825	6.11694	5.98282	6.17298	5.94995	6.48028	0.958432	0.96754	0.985599	1.08843	0.969524	1.01972	0.991318	0.905897	0.835402	0.904382	1.04907	1.0182	0.943931	0.923234	0.952579	0.918162	-0.061252	-0.0476074	-0.0209273	0.122248	-0.0446513	0.0281723	-0.0125803	-0.142581	-0.259458	-0.144996	0.0691152	0.0260267	-0.0832466
sp|Q12788|TBL3_HUMAN	TBL3	TBL3_HUMAN Transducin beta-like protein 3	31	5.69039	6.79606	7.09347	5.66508	5.90662	5.70111	5.2856	6.1873	7.81259	6.10172	5.45975	5.76705	6.34903	6.64198	6.41376	7.12849	6.31125	0.901626	1.07682	1.12394	0.897616	0.935888	0.903325	0.837489	0.98036	1.23788	0.966801	0.865082	0.913773	1.00599	1.0524	1.01624	1.12949	-0.149398	0.106773	0.168566	-0.155829	-0.095593	-0.146683	-0.255859	-0.0286158	0.307875	-0.0487098	-0.209091	-0.130092	0.00861042
sp|O95319-3|CELF2_HUMAN	CELF2	CELF2_HUMAN Isoform 3 of CUGBP Elav-like family member 2	13	5.84991	5.96214	6.37917	6.52093	6.0754	5.91349	5.84929	6.14824	6.36845	6.48521	6.61654	6.77167	6.31282	6.22868	6.35806	6.16001	6.17804	0.946888	0.965054	1.03256	1.0555	0.983387	0.957179	0.946788	0.995177	1.03082	1.04972	1.07098	1.09609	1.02182	1.0082	1.02914	0.997082	-0.0787342	-0.0513184	0.0462201	0.0779291	-0.0241692	-0.0631388	-0.0788871	-0.00697515	0.0437937	0.0700047	0.0989284	0.132363	0.031136
sp|Q92879-4|CELF1_HUMAN	CELF1	CELF1_HUMAN Isoform 4 of CUGBP Elav-like family member 1	18	6.02483	6.0867	6.26554	6.38367	6.06137	5.60127	5.99721	6.83942	6.47914	6.27124	6.09561	6.38733	6.37925	6.41235	6.4189	6.29617	6.19018	0.973288	0.983282	1.01217	1.03126	0.97919	0.904863	0.968826	1.10488	1.04668	1.01309	0.984722	1.03185	1.03054	1.03589	1.03695	1.01712	-0.039062	-0.0243223	0.0174563	0.0444035	-0.0303386	-0.144229	-0.045691	0.143891	0.0658198	0.0187682	-0.0222119	0.0452305	0.0434043
sp|P52815|RM12_HUMAN	MRPL12	RM12_HUMAN 39S ribosomal protein L12, mitochondrial	10	3.2011	4.82473	5.09814	7.2411	2.13891	6.46126	6.14643	9.67433	5.73234	7.69467	4.24794	8.64296	4.83588	7.88228	8.07365	8.10428	5.09127	0.628743	0.947648	1.00135	1.42226	0.420113	1.26909	1.20725	1.90018	1.12592	1.51135	0.834358	1.6976	0.949838	1.5482	1.58578	1.5918	-0.669457	-0.0775767	0.00194612	0.508184	-1.25115	0.343791	0.271724	0.926137	0.171099	0.595835	-0.261261	0.763501	-0.0742464
sp|Q9UBX3-2|DIC_HUMAN	SLC25A10	DIC_HUMAN Isoform 2 of Mitochondrial dicarboxylate carrier	25	6.11092	6.14823	6.27311	6.5167	5.8945	6.80745	6.53699	6.4149	5.65512	6.14402	6.36207	6.72232	6.22773	6.05561	6.07359	6.05673	6.26224	0.975836	0.981794	1.00174	1.04063	0.941277	1.08706	1.04387	1.02438	0.903051	0.981122	1.01594	1.07347	0.994489	0.967004	0.969875	0.967183	-0.0352892	-0.0265077	0.00250206	0.0574628	-0.0873094	0.120436	0.0619477	0.034748	-0.147121	-0.0274959	0.0228174	0.10228	-0.0079724
sp|Q9UJX6|ANC2_HUMAN	ANAPC2	ANC2_HUMAN Anaphase-promoting complex subunit 2	20	6.29425	6.23354	6.40092	6.31189	6.38779	6.04438	6.02104	5.85075	6.10158	6.31756	6.51928	6.58573	6.13082	6.37018	6.17336	6.25692	6.31015	0.99748	0.987859	1.01438	1.00028	1.0123	0.957882	0.954183	0.927197	0.966947	1.00117	1.03314	1.04367	0.971581	1.00951	0.978322	0.991564	-0.00363982	-0.0176226	0.020605	0.000397763	0.0176426	-0.0620799	-0.0676616	-0.109053	-0.0484914	0.00169316	0.0470383	0.0616691	-0.0415943
sp|Q8NB16|MLKL_HUMAN	MLKL	MLKL_HUMAN Mixed lineage kinase domain-like protein	7	5.93257	5.88918	6.37546	6.3074	6.00558	6.16295	6.13625	5.82718	6.21712	6.28062	7.11013	6.84715	6.49455	6.55155	5.8998	5.96251	6.12615	0.968401	0.961318	1.0407	1.02959	0.980318	1.00601	1.00165	0.951197	1.01485	1.02521	1.16062	1.11769	1.06014	1.06944	0.963051	0.973288	-0.0463241	-0.0569145	0.0575482	0.0420641	-0.0286777	0.00863981	0.00237598	-0.0721834	0.0212651	0.0359257	0.214895	0.160522	0.0842483
sp|Q96CW5|GCP3_HUMAN	TUBGCP3	GCP3_HUMAN Gamma-tubulin complex component 3	20	5.94613	6.41383	6.66291	6.35727	6.35384	5.4787	5.89381	6.84535	6.45101	6.35846	5.90237	6.05223	6.1842	6.60355	6.2527	6.24366	6.34504	0.937131	1.01084	1.0501	1.00193	1.00139	0.863463	0.928885	1.07885	1.0167	1.00212	0.930234	0.953853	0.974652	1.04074	0.985448	0.984023	-0.0936771	0.015558	0.0705243	0.00277924	0.00200064	-0.211795	-0.106428	0.109496	0.0238969	0.00304927	-0.104334	-0.0681613	-0.0370411
sp|P12081|SYHC_HUMAN	HARS	SYHC_HUMAN Histidine--tRNA ligase, cytoplasmic	62	6.75636	5.8315	5.77455	5.95544	6.40362	6.8237	6.601	6.07262	5.74896	6.20455	6.67722	6.31844	6.36101	6.00091	6.32707	6.14305	6.07946	1.11134	0.959213	0.949845	0.9796	1.05332	1.12242	1.08579	0.998874	0.945636	1.02058	1.09832	1.03931	1.04631	0.987079	1.04073	1.01046	0.152302	-0.0600768	-0.0742353	-0.0297357	0.0749439	0.16661	0.118741	-0.00162468	-0.0806428	0.0293828	0.135304	0.0556246	0.0653121
sp|P49590|SYHM_HUMAN	HARS2	SYHM_HUMAN Probable histidine--tRNA ligase, mitochondrial	13	6.30113	5.93582	6.27917	6.63033	6.44175	6.70721	6.13948	6.10492	5.62737	6.02561	6.58207	6.56554	6.12622	5.96217	6.25166	6.31954	6.28661	1.00231	0.9442	0.998816	1.05467	1.02468	1.0669	0.976596	0.971099	0.895135	0.958483	1.047	1.04437	0.974487	0.948392	0.99444	1.00524	0.00332773	-0.0828355	-0.00170897	0.0767978	0.0351698	0.0934299	-0.0341664	-0.0423104	-0.159822	-0.0611755	0.0662585	0.0626308	-0.0372857
sp|Q9H0D6|XRN2_HUMAN	XRN2	XRN2_HUMAN 5'-3' exoribonuclease 2	29	5.81729	6.46165	6.69787	6.27691	6.1066	6.03443	5.76594	6.24012	6.67586	6.13365	5.73444	6.04798	6.16116	6.5501	6.5253	6.77071	6.31343	0.921415	1.02348	1.06089	0.994216	0.96724	0.955808	0.913282	0.988388	1.05741	0.971524	0.908292	0.957955	0.975882	1.03749	1.03356	1.07243	-0.118077	0.0334786	0.0852784	-0.00836949	-0.0480547	-0.0652065	-0.130868	-0.0168502	0.0805297	-0.0416782	-0.138771	-0.0619706	-0.035222
sp|P78549|NTHL1_HUMAN	NTHL1	NTHL1_HUMAN Endonuclease III-like protein 1	5	5.69785	5.91632	7.09248	6.68657	5.94016	5.67121	5.19038	6.78304	6.56156	6.54792	5.4278	6.46049	6.56015	6.64673	6.15099	6.66635	6.3483	0.897539	0.931953	1.11722	1.05328	0.935708	0.893342	0.817601	1.06848	1.03359	1.03144	0.855	1.01767	1.03337	1.04701	0.968918	1.0501	-0.155954	-0.101671	0.159919	0.0748949	-0.0958697	-0.162715	-0.290531	0.0955606	0.0476674	0.0446653	-0.226004	0.0252721	0.0473574
sp|Q9NRV9|HEBP1_HUMAN	HEBP1	HEBP1_HUMAN Heme-binding protein 1	3	6.56425	5.95524	5.34007	5.91913	5.95284	7.43378	6.26556	6.66233	5.60857	6.69823	6.57983	6.58134	6.01873	6.26006	6.05634	6.1037	5.94467	1.10422	1.00178	0.898295	0.995703	1.00137	1.25049	1.05398	1.12072	0.943462	1.12676	1.10684	1.1071	1.01246	1.05305	1.01878	1.02675	0.143033	0.00256232	-0.154739	-0.00621219	0.00198079	0.322499	0.0758461	0.164429	-0.0839644	0.172183	0.146453	0.146784	0.0178618
sp|Q92797|SYMPK_HUMAN	SYMPK	SYMPK_HUMAN Symplekin	60	6.19354	6.12424	6.00134	6.44082	6.07806	5.7302	6.60824	6.57095	6.09579	6.37558	6.40067	6.68429	6.15644	6.47689	5.96768	6.09527	6.18999	1.00057	0.989379	0.969524	1.04052	0.981918	0.925721	1.06757	1.06155	0.984783	1.02998	1.03404	1.07986	0.994581	1.04635	0.964086	0.984699	0.000828323	-0.0154051	-0.0446512	0.0573085	-0.026325	-0.11135	0.0943302	0.0861661	-0.0221227	0.0426207	0.048287	0.110838	-0.00783957
sp|Q12872-2|SFSWA_HUMAN	SFSWAP	SFSWA_HUMAN Isoform 2 of Splicing factor, suppressor of white-apricot homolog	14	6.68261	6.54364	7.14132	7.11397	6.35001	6.17191	6.3885	6.96455	5.77801	5.70212	5.66574	5.82446	5.52303	5.75081	6.0569	6.34243	6.87039	0.972669	0.952442	1.03944	1.03545	0.924258	0.898335	0.929861	1.01371	0.841002	0.829956	0.824661	0.847763	0.803889	0.837043	0.881595	0.923155	-0.0399793	-0.0702976	0.0557998	0.0502639	-0.113632	-0.154674	-0.104914	0.0196392	-0.249818	-0.268893	-0.278127	-0.238267	-0.314931
sp|Q15024|EXOS7_HUMAN	EXOSC7	EXOS7_HUMAN Exosome complex component RRP42	21	6.64464	5.98031	6.36034	6.08204	6.31939	7.18146	6.34984	6.09542	5.79798	5.86248	6.262	6.32913	6.11043	6.30289	6.11915	6.2025	6.26683	1.06029	0.95428	1.01492	0.970513	1.00839	1.14595	1.01325	0.972648	0.925185	0.935477	0.999229	1.00994	0.975043	1.00575	0.976434	0.989734	0.0844546	-0.0675162	0.0213675	-0.0431811	0.0120489	0.196541	0.0189838	-0.0400108	-0.112186	-0.0962253	-0.00111292	0.0142708	-0.0364625
sp|P30613|KPYR_HUMAN	PKLR	KPYR_HUMAN Pyruvate kinase PKLR	82	6.43011	5.84215	5.96229	6.5052	6.24841	6.53807	6.48956	5.94713	5.69132	6.26119	6.68879	6.49729	6.30487	6.2375	6.11782	6.2383	6.18494	1.03964	0.944577	0.964002	1.05178	1.01026	1.0571	1.04925	0.961551	0.92019	1.01233	1.08146	1.0505	1.01939	1.0085	0.989148	1.00863	0.0560844	-0.0822596	-0.0528925	0.0728344	0.0147301	0.0801058	0.0693616	-0.0565654	-0.119996	0.0176779	0.112986	0.0710791	0.0277076
sp|P14618-2|KPYM_HUMAN	PKM	KPYM_HUMAN Isoform M1 of Pyruvate kinase PKM	178	6.50632	5.87121	6.01289	6.31466	6.28355	6.59826	6.75753	5.65141	5.72886	6.38746	6.73474	6.48389	6.29839	6.17301	6.08023	6.11759	6.17627	1.05344	0.950608	0.973547	1.02241	1.01737	1.06832	1.09411	0.91502	0.92756	1.03419	1.09042	1.04981	1.01977	0.999472	0.98445	0.990499	0.075106	-0.073078	-0.0386773	0.0319692	0.024844	0.0953498	0.12976	-0.128125	-0.108488	0.0485065	0.124886	0.0701238	0.0282473
sp|P14618|KPYM_HUMAN	PKM	KPYM_HUMAN Pyruvate kinase PKM	27	6.62342	5.7757	6.2119	6.27054	6.1715	6.88999	6.80516	4.26146	5.9778	6.43612	6.9738	6.74169	6.37945	6.05576	6.22601	6.1997	6.22039	1.06479	0.928511	0.998635	1.00806	0.99214	1.10765	1.09401	0.685079	0.961001	1.03468	1.12112	1.08381	1.02557	0.973534	1.0009	0.996674	0.0905713	-0.107009	-0.00197043	0.0115847	-0.0113839	0.147497	0.129624	-0.545657	-0.0573904	0.0491862	0.16494	0.116105	0.036427
sp|P14317|HCLS1_HUMAN	HCLS1	HCLS1_HUMAN Hematopoietic lineage cell-specific protein	25	6.28274	5.78925	5.79316	6.5008	6.05388	6.88236	6.57244	6.56111	5.54708	6.41304	6.6577	6.66124	6.24997	6.03379	5.95688	6.04455	6.09149	1.0314	0.950384	0.951026	1.06719	0.993826	1.12983	1.07895	1.07709	0.910628	1.05279	1.09295	1.09353	1.02602	0.990528	0.977902	0.992295	0.0445993	-0.0734181	-0.0724441	0.0938227	-0.00893449	0.176109	0.109634	0.107145	-0.135066	0.0742138	0.128229	0.128996	0.0370547
sp|P41227|NAA10_HUMAN	NAA10	NAA10_HUMAN N-alpha-acetyltransferase 10	39	6.823	6.07689	6.09662	6.19365	6.56339	6.28136	6.45069	6.29233	5.83511	6.03199	6.6215	6.27285	6.16239	6.01243	6.21588	6.06993	6.29754	1.08344	0.964963	0.968095	0.983503	1.04221	0.997431	1.02432	0.999173	0.92657	0.957833	1.05144	0.996079	0.978539	0.954727	0.987033	0.963857	0.115618	-0.0514552	-0.0467788	-0.0239985	0.0596528	-0.00371142	0.0346651	-0.00119405	-0.110029	-0.0621543	0.0723697	-0.00566732	-0.0312984
sp|Q9BSU3|NAA11_HUMAN	NAA11	NAA11_HUMAN N-alpha-acetyltransferase 11	5	6.25378	6.37413	5.86735	6.33376	6.30909	6.64964	5.86199	6.43592	6.18734	6.59128	6.74204	6.76567	6.15786	5.62612	5.91267	5.93137	6.20725	1.0075	1.02688	0.945241	1.02038	1.01641	1.07127	0.944377	1.03684	0.996792	1.06187	1.08615	1.08996	0.992042	0.906378	0.952542	0.955554	0.0107731	0.038273	-0.0812464	0.0291068	0.0234765	0.0993208	-0.0825649	0.052191	-0.0046361	0.0866032	0.11923	0.124277	-0.0115263
sp|Q9H0L4|CSTFT_HUMAN	CSTF2T	CSTFT_HUMAN Cleavage stimulation factor subunit 2 tau variant	32	5.3897	6.06427	6.12039	6.47491	4.75119	6.47184	6.79179	6.6778	6.23262	6.67948	6.36622	6.61866	6.03109	6.46063	6.3785	6.49093	6.01232	0.896443	1.00864	1.01798	1.07694	0.790243	1.07643	1.12965	1.11069	1.03664	1.11097	1.05886	1.10085	1.00312	1.07457	1.06091	1.07961	-0.157716	0.0124128	0.0257024	0.106939	-0.339632	0.106255	0.175871	0.151452	0.0519176	0.151815	0.0825158	0.138618	0.00449757
sp|P33240|CSTF2_HUMAN	CSTF2	CSTF2_HUMAN Cleavage stimulation factor subunit 2	14	4.04837	6.22013	6.30968	6.94393	2.0885	6.84552	7.50023	6.96908	6.256	6.76591	6.22258	7.03277	6.34605	6.86131	6.72554	6.8644	5.88053	0.688437	1.05775	1.07298	1.18083	0.355155	1.1641	1.27543	1.18511	1.06385	1.15056	1.05817	1.19594	1.07916	1.16678	1.1437	1.16731	-0.538604	0.0809992	0.101621	0.239807	-1.49348	0.219215	0.350989	0.245023	0.0892949	0.202338	0.0815673	0.258147	0.109913
sp|O95772|MENTO_HUMAN	STARD3NL	MENTO_HUMAN MLN64 N-terminal domain homolog	6	6.49639	5.9852	6.20054	6.86463	5.99506	6.02381	6.91759	5.11399	5.74588	6.27826	6.94359	6.98981	6.37487	6.29244	5.82839	5.94956	6.38669	1.01718	0.937136	0.970853	1.07483	0.93868	0.943182	1.08313	0.800726	0.899665	0.983023	1.0872	1.09443	0.998149	0.985243	0.912584	0.931556	0.0245698	-0.093669	-0.0426746	0.104114	-0.0912942	-0.0843922	0.115201	-0.320619	-0.152541	-0.0247036	0.120613	0.130185	-0.0026725
sp|Q9Y5V0|ZN706_HUMAN	ZNF706	ZN706_HUMAN Zinc finger protein 706	5	6.17567	6.02449	7.27541	7.94453	5.82525	6.06021	6.74712	5.78261	5.1036	5.91703	6.22494	6.56218	6.30745	6.00653	5.75996	6.28303	6.85503	0.900897	0.878843	1.06133	1.15894	0.849778	0.884054	0.984259	0.843558	0.744505	0.863167	0.908084	0.95728	0.920121	0.876223	0.840254	0.916558	-0.150566	-0.186323	0.0858666	0.2128	-0.234842	-0.177794	-0.0228901	-0.245441	-0.425647	-0.212289	-0.139102	-0.0629868	-0.120105
sp|Q96MW1|CCD43_HUMAN	CCDC43	CCD43_HUMAN Coiled-coil domain-containing protein 43	19	6.39135	5.73491	5.95214	6.12793	6.37542	6.31373	6.67345	6.56432	5.81576	6.13321	6.60383	6.51734	6.33153	5.97281	6.3422	6.15008	6.05158	1.05615	0.947671	0.983568	1.01262	1.05351	1.04332	1.10276	1.08473	0.961031	1.01349	1.09126	1.07696	1.04626	0.986983	1.04802	1.01628	0.0788082	-0.0775416	-0.023904	0.0180874	0.0752079	0.0611801	0.14112	0.117333	-0.0573447	0.0193299	0.125991	0.106971	0.0652417
sp|O00401|WASL_HUMAN	WASL	WASL_HUMAN Neural Wiskott-Aldrich syndrome protein	7	6.42569	6.21808	5.93501	6.27014	6.09845	5.85941	6.04619	6.99841	6.42398	6.6993	6.36175	6.06568	6.16009	5.99454	6.36365	6.07962	6.21223	1.03436	1.00094	0.955375	1.00932	0.981685	0.943206	0.973272	1.12655	1.03409	1.07841	1.02407	0.976409	0.991607	0.964958	1.02437	0.978653	0.0487401	0.00135793	-0.0658608	0.0133864	-0.0266686	-0.0843558	-0.0390849	0.171916	0.0483562	0.108899	0.0343124	-0.0344419	-0.0121598
sp|Q96EV2|RBM33_HUMAN	RBM33	RBM33_HUMAN RNA-binding protein 33	18	6.24405	6.08899	5.93949	6.18297	6.24504	6.44054	6.01423	6.28634	6.6549	6.68485	6.31432	6.55069	5.90946	6.09064	6.17364	6.17985	6.11388	1.02129	0.99593	0.971477	1.0113	1.02145	1.05343	0.983702	1.02821	1.08849	1.09339	1.03279	1.07145	0.966565	0.9962	1.00978	1.01079	0.030395	-0.00588411	-0.041748	0.0162129	0.0306238	0.0750946	-0.023707	0.0401332	0.12233	0.128808	0.0465403	0.0995598	-0.0490608
sp|Q92616|GCN1L_HUMAN	GCN1L1	GCN1L_HUMAN Translational activator GCN1	219	5.99776	6.56039	6.68641	6.00808	6.32918	5.17094	6.13458	5.97109	7.04617	6.28981	5.99409	5.85113	6.74397	6.4672	6.53065	6.21853	6.31316	0.950041	1.03916	1.05912	0.951676	1.00254	0.819073	0.971713	0.945816	1.11611	0.996301	0.94946	0.926815	1.06824	1.0244	1.03445	0.985011	-0.0739385	0.0554193	0.0828695	-0.0714583	0.00365628	-0.287936	-0.0413977	-0.080368	0.158477	-0.00534588	-0.0748216	-0.109647	0.0952358
sp|P78346-2|RPP30_HUMAN	RPP30	RPP30_HUMAN Isoform 2 of Ribonuclease P protein subunit p30	13	6.10237	6.05216	6.60347	6.41453	6.35002	7.58891	6.02716	6.4284	5.91016	5.92952	5.86982	6.39215	6.19968	5.62413	6.26003	6.24749	6.29313	0.969687	0.961709	1.04931	1.01929	1.00904	1.2059	0.957736	1.02149	0.939144	0.942221	0.932734	1.01573	0.98515	0.893693	0.99474	0.992747	-0.0444087	-0.0563282	0.069446	0.0275652	0.0129828	0.270114	-0.0623	0.0306814	-0.0905811	-0.085863	-0.100462	0.0225229	-0.0215846
sp|P49641|MA2A2_HUMAN	MAN2A2	MA2A2_HUMAN Alpha-mannosidase 2x	14	6.49301	6.08775	6.27293	6.50941	6.16132	6.17081	6.6171	6.21756	6.04488	6.39844	6.47822	6.56248	5.8759	6.18732	5.85281	6.07007	6.34077	1.02401	0.960096	0.9893	1.0266	0.971698	0.973195	1.04358	0.980568	0.953335	1.00909	1.02168	1.03496	0.926685	0.975799	0.923043	0.957307	0.0342282	-0.0587501	-0.0155197	0.0378676	-0.0414197	-0.0391993	0.0615399	-0.0283107	-0.0689455	0.013061	0.0309383	0.0495819	-0.109849
sp|Q16706|MA2A1_HUMAN	MAN2A1	MA2A1_HUMAN Alpha-mannosidase 2	19	6.21063	5.93197	6.4127	6.59809	6.0777	6.44005	6.68846	6.53124	5.75509	6.13421	6.83613	6.83274	6.03393	6.24566	5.56334	5.70807	6.28835	0.987641	0.943327	1.01978	1.04926	0.966502	1.02412	1.06363	1.03863	0.915199	0.975488	1.08711	1.08657	0.959541	0.993212	0.884706	0.907722	-0.0179413	-0.0841696	0.028251	0.0693675	-0.0491555	0.0343909	0.0889931	0.054676	-0.127842	-0.0358034	0.120499	0.119783	-0.059583
sp|Q9Y613|FHOD1_HUMAN	FHOD1	FHOD1_HUMAN FH1/FH2 domain-containing protein 1	48	5.95717	6.51999	6.78574	6.18974	6.26217	5.41777	5.87628	6.13897	7.01502	6.30761	5.68419	5.86347	6.40111	6.85694	6.48768	6.23615	6.36316	0.936197	1.02465	1.06641	0.972746	0.984129	0.851428	0.923485	0.964768	1.10244	0.99127	0.893297	0.921471	1.00596	1.0776	1.01957	0.98004	-0.0951163	0.0351264	0.0927628	-0.0398646	-0.0230807	-0.232044	-0.11484	-0.0517468	0.140704	-0.0126499	-0.162789	-0.117989	0.0085787
sp|P07814|SYEP_HUMAN	EPRS	SYEP_HUMAN Bifunctional glutamate/proline--tRNA ligase	189	5.94539	6.52456	6.70575	5.71908	6.52847	5.70776	5.59565	6.53452	7.2741	6.19345	5.43815	5.66315	6.51816	6.875	6.50729	6.26953	6.22369	0.955283	1.04834	1.07745	0.91892	1.04897	0.917101	0.899088	1.04994	1.16878	0.99514	0.873782	0.909934	1.04731	1.10465	1.04557	1.00736	-0.0659999	0.0681093	0.107627	-0.121988	0.0689736	-0.124847	-0.153466	0.0703099	0.224997	-0.00702809	-0.194655	-0.136167	0.0666934
sp|P47897|SYQ_HUMAN	QARS	SYQ_HUMAN Glutamine--tRNA ligase	54	5.77632	6.65883	7.20867	5.45093	6.49735	5.84819	5.31341	5.96294	7.54977	6.11896	5.23684	5.49905	6.51413	7.2158	6.74816	6.40065	6.27369	0.920722	1.06139	1.14903	0.868856	1.03565	0.932177	0.846936	0.950468	1.2034	0.975337	0.834731	0.876526	1.03833	1.15017	1.07563	1.02024	-0.119163	0.085955	0.200419	-0.202811	0.0505378	-0.101323	-0.239676	-0.0732898	0.267119	-0.0360272	-0.260617	-0.190131	0.0542588
sp|P0C7T5|ATX1L_HUMAN	ATXN1L	ATX1L_HUMAN Ataxin-1-like	2	6.42434	6.24071	6.62037	6.01358	5.87342	5.68264	6.48782	5.48483	5.92505	6.82338	7.32796	7.15516	6.60099	5.12935	6.29347	5.91695	6.32475	1.01575	0.986713	1.04674	0.950801	0.928641	0.898477	1.02578	0.867201	0.936804	1.07884	1.15862	1.1313	1.04368	0.810996	0.995054	0.935523	0.0225398	-0.0192983	0.0659034	-0.0727843	-0.106808	-0.154447	0.0367253	-0.205562	-0.0941811	0.109478	0.212403	0.177976	0.061674
sp|Q9Y5B9|SP16H_HUMAN	SUPT16H	SP16H_HUMAN FACT complex subunit SPT16	71	6.306	6.18585	6.07108	5.97146	6.26792	5.32721	6.32616	6.1731	6.8365	6.53567	6.47177	6.45573	6.46944	6.15401	6.38674	6.06136	6.1336	1.02811	1.00852	0.989807	0.973566	1.0219	0.868529	1.03139	1.00644	1.1146	1.06555	1.05513	1.05252	1.05475	1.00333	1.04127	0.988223	0.0399917	0.0122384	-0.0147803	-0.0386498	0.0312533	-0.203353	0.0445965	0.00926167	0.156524	0.0916016	0.0774268	0.0738467	0.0769073
sp|P17181|INAR1_HUMAN	IFNAR1	INAR1_HUMAN Interferon alpha/beta receptor 1	2	6.45733	5.99014	5.84932	6.85426	5.88503	6.10947	6.71917	5.97549	5.295	6.58444	6.80838	7.5626	6.22949	5.90883	5.66996	6.10109	6.28776	1.02697	0.952666	0.930271	1.0901	0.93595	0.971645	1.06861	0.950336	0.842112	1.04718	1.0828	1.20275	0.990732	0.939735	0.901745	0.970312	0.038391	-0.069957	-0.104278	0.124454	-0.095497	-0.0414995	0.0957363	-0.0734897	-0.247916	0.066514	0.114765	0.266336	-0.0134327
sp|Q9NX02|NALP2_HUMAN	NLRP2	NALP2_HUMAN NACHT, LRR and PYD domains-containing protein 2	38	6.10845	6.31032	6.50181	6.38749	6.09964	5.63793	6.66782	5.70238	6.4934	6.18371	6.36784	6.16271	6.43746	6.53234	6.28285	6.12383	6.32702	0.965455	0.997361	1.02763	1.00956	0.964062	0.891088	1.05386	0.901275	1.0263	0.97735	1.00645	0.974031	1.01746	1.03245	0.993019	0.967886	-0.0507192	-0.00381242	0.0393158	0.0137235	-0.0528015	-0.16636	0.0756896	-0.149961	0.0374485	-0.0330529	0.0092785	-0.0379607	0.024966
sp|Q14980|NUMA1_HUMAN	NUMA1	NUMA1_HUMAN Nuclear mitotic apparatus protein 1	80	6.09546	7.30393	7.05802	5.91261	6.35326	5.63348	5.57984	6.08064	7.16071	5.90089	5.56954	5.31666	6.05669	6.63121	6.58422	6.76284	6.59251	0.924605	1.10791	1.07061	0.896868	0.96371	0.854528	0.846391	0.922357	1.08619	0.895091	0.844829	0.80647	0.918724	1.00587	0.998743	1.02584	-0.113092	0.147846	0.0984368	-0.157032	-0.0533297	-0.2268	-0.240603	-0.116604	0.119276	-0.159894	-0.243269	-0.310307	-0.122297
sp|Q14980-2|NUMA1_HUMAN	NUMA1	NUMA1_HUMAN Isoform 2 of Nuclear mitotic apparatus protein 1	2	6.1595	7.03083	7.14087	5.93275	6.39098	5.22652	4.95422	5.57983	7.88859	5.267	5.98761	5.56977	6.64311	6.99068	6.67113	6.5666	6.56599	0.938092	1.0708	1.08755	0.903558	0.973346	0.795999	0.754528	0.849808	1.20143	0.802164	0.911913	0.848276	1.01175	1.06468	1.01601	1.00009	-0.0921988	0.098683	0.121088	-0.146311	-0.0389748	-0.329161	-0.406354	-0.234791	0.264755	-0.318031	-0.133032	-0.237394	0.0168468
sp|O00471|EXOC5_HUMAN	EXOC5	EXOC5_HUMAN Exocyst complex component 5	35	6.0936	6.39583	6.41131	6.44879	6.08011	5.51286	6.16069	5.79351	6.3835	6.51934	6.38514	6.34961	6.35365	6.44577	6.36181	6.30448	6.33738	0.961533	1.00922	1.01167	1.01758	0.959404	0.869895	0.972119	0.91418	1.00728	1.02871	1.00754	1.00193	1.00257	1.0171	1.00385	0.994808	-0.0565923	0.0132445	0.0167321	0.0251414	-0.0597897	-0.201086	-0.0407952	-0.129449	0.0104606	0.0408388	0.0108312	0.00278089	0.00369853
sp|Q3ZAQ7|VMA21_HUMAN	VMA21	VMA21_HUMAN Vacuolar ATPase assembly integral membrane protein VMA21	1	6.78611	5.77407	5.26105	6.19483	9.23246	5.91955	5.62404	4.34047	5.43119	6.32822	6.43867	7.21346	6.79148	6.57391	6.33219	5.75831	6.00401	1.13026	0.961701	0.876255	1.03178	1.53771	0.985932	0.936713	0.722928	0.904593	1.054	1.07239	1.20144	1.13116	1.09492	1.05466	0.959077	0.176657	-0.056339	-0.190577	0.0451371	0.620788	-0.0204401	-0.0943207	-0.468076	-0.144659	0.0758722	0.100835	0.264764	0.177798
sp|Q8N0Z3|SPICE_HUMAN	SPICE1	SPICE_HUMAN Spindle and centriole-associated protein 1	2	5.63477	7.62472	7.88453	7.39638	5.68875	4.06088	5.98247	5.8926	5.90427	5.31988	5.60171	5.79978	7.07686	6.9335	6.92872	6.27019	7.1351	0.789725	1.06862	1.10503	1.03662	0.797291	0.569141	0.838456	0.825861	0.827496	0.745593	0.785092	0.812852	0.991838	0.971745	0.971075	0.878781	-0.340577	0.0957507	0.144091	0.0518857	-0.326822	-0.813141	-0.254192	-0.276029	-0.273175	-0.42354	-0.349066	-0.298935	-0.0118243
sp|O75558|STX11_HUMAN	STX11	STX11_HUMAN Syntaxin-11	1	5.08901	5.53387	6.49079	9.01724	6.43748	5.71149	5.71065	6.52282	8.07579	6.39359	5.83676	4.46181	6.59929	5.90493	6.13147	6.08301	6.53273	0.779002	0.847099	0.99358	1.38032	0.98542	0.874289	0.87416	0.998483	1.2362	0.978701	0.893464	0.682993	1.01019	0.9039	0.938577	0.931159	-0.3603	-0.239397	-0.00929138	0.465	-0.0211894	-0.193818	-0.19403	-0.00218964	0.305918	-0.0310592	-0.162518	-0.550056	0.0146254
sp|Q15173|2A5B_HUMAN	PPP2R5B	2A5B_HUMAN Serine/threonine-protein phosphatase 2A 56 kDa regulatory subunit beta isoform	4	6.7297	5.92244	7.09647	6.52891	5.6016	6.3641	6.42598	6.45066	6.02075	6.13409	6.04833	6.51192	6.15842	6.26844	5.85658	5.88161	6.56938	1.0244	0.901522	1.08023	0.99384	0.852683	0.968752	0.978171	0.981928	0.916487	0.93374	0.920685	0.991253	0.937443	0.954191	0.891497	0.895307	0.034785	-0.149566	0.111344	-0.00891507	-0.229918	-0.0458007	-0.0318407	-0.0263104	-0.125814	-0.0989079	-0.11922	-0.0126742	-0.093197
sp|Q15172|2A5A_HUMAN	PPP2R5A	2A5A_HUMAN Serine/threonine-protein phosphatase 2A 56 kDa regulatory subunit alpha isoform	16	6.23749	6.33541	6.38729	6.49437	6.34944	5.64442	6.53912	5.91045	6.29218	6.27283	6.59521	6.6387	6.32503	5.89736	6.12367	5.95702	6.36364	0.980176	0.995564	1.00372	1.02054	0.997769	0.88698	1.02758	0.928784	0.988771	0.98573	1.03639	1.04322	0.993933	0.926727	0.96229	0.936103	-0.0288866	-0.00641424	0.00535173	0.0293374	-0.00322287	-0.173027	0.0392443	-0.106584	-0.0162923	-0.0207358	0.0515664	0.0610485	-0.0087799
sp|Q16537|2A5E_HUMAN	PPP2R5E	2A5E_HUMAN Serine/threonine-protein phosphatase 2A 56 kDa regulatory subunit epsilon isoform	14	5.84945	6.9418	6.16665	7.86665	7.07865	5.8602	6.07884	5.99773	6.06983	6.1913	6.05325	6.1754	6.17351	5.55602	6.50306	5.43766	6.70614	0.872253	1.03514	0.919553	1.17305	1.05555	0.873856	0.906459	0.894364	0.905116	0.923229	0.902643	0.920858	0.920576	0.828498	0.969718	0.810848	-0.197181	0.0498277	-0.120995	0.230267	0.0779922	-0.194532	-0.141686	-0.161065	-0.143826	-0.11524	-0.147772	-0.118949	-0.119391
sp|Q8WVV9|HNRLL_HUMAN	HNRNPLL	HNRLL_HUMAN Heterogeneous nuclear ribonucleoprotein L-like	13	5.79643	6.35882	6.48811	6.19632	6.21473	5.67827	5.76775	6.53021	6.65575	6.4957	6.1369	6.423	6.18909	6.43974	6.4131	6.21607	6.20992	0.933415	1.02398	1.0448	0.99781	1.00077	0.914387	0.928796	1.05158	1.07179	1.04602	0.988241	1.03431	0.996646	1.03701	1.03272	1.00099	-0.0994101	0.0341844	0.0632236	-0.00316303	0.00111703	-0.129123	-0.106566	0.0725547	0.100027	0.0649103	-0.0170646	0.0486726	-0.00484738
sp|P14866|HNRPL_HUMAN	HNRNPL	HNRPL_HUMAN Heterogeneous nuclear ribonucleoprotein L	32	4.87342	7.30001	7.16323	4.87517	5.01531	5.96226	4.61579	6.97389	8.61355	5.62863	4.59438	5.43008	6.81487	6.71618	7.27548	8.14775	6.05296	0.80513	1.20602	1.18343	0.805419	0.828572	0.985016	0.762568	1.15215	1.42303	0.929897	0.759031	0.897095	1.12587	1.10957	1.20197	1.34608	-0.312706	0.270258	0.24297	-0.312188	-0.271301	-0.0217809	-0.391063	0.204323	0.508968	-0.104856	-0.39777	-0.156667	0.171046
sp|Q13011|ECH1_HUMAN	ECH1	ECH1_HUMAN Delta(3,5)-Delta(2,4)-dienoyl-CoA isomerase, mitochondrial	19	6.50419	6.21603	6.09998	6.31215	6.63207	6.19685	6.47963	5.56094	6.176	6.18487	6.58777	6.38267	6.27304	6.05503	6.17692	6.16187	6.28309	1.03519	0.989327	0.970857	1.00463	1.05554	0.986275	1.03128	0.885065	0.982956	0.984368	1.04849	1.01585	0.998401	0.963703	0.983103	0.980707	0.0498957	-0.0154802	-0.0426692	0.00665782	0.0779856	-0.0199386	0.0444378	-0.176145	-0.0248009	-0.0227304	0.0683165	0.0226864	-0.00230891
sp|O95602|RPA1_HUMAN	POLR1A	RPA1_HUMAN DNA-directed RNA polymerase I subunit RPA1	53	5.95726	6.86076	7.36194	5.98717	6.39222	5.63747	5.34159	6.23446	7.10236	6.03887	5.2115	5.7066	6.20197	6.95257	6.32024	6.69302	6.54178	0.910648	1.04876	1.12537	0.91522	0.977137	0.861764	0.816534	0.953022	1.08569	0.923123	0.796648	0.872331	0.948055	1.06279	0.966134	1.02312	-0.135035	0.0686846	0.170402	-0.12781	-0.0333667	-0.214636	-0.292415	-0.0694192	0.118615	-0.115405	-0.327985	-0.197052	-0.0769572
sp|Q5RL73|RBM48_HUMAN	RBM48	RBM48_HUMAN RNA-binding protein 48	1	6.2692	6.89729	6.11789	6.51784	5.88231	7.70471	6.22061	4.51948	5.82711	5.98867	6.20304	6.22565	5.83695	5.75371	7.05324	6.9823	6.45055	0.971885	1.06926	0.948428	1.01043	0.911908	1.19443	0.964353	0.700634	0.90335	0.928396	0.961629	0.965134	0.904876	0.891971	1.09343	1.08243	-0.0411419	0.0966063	-0.0763891	0.0149706	-0.13304	0.256317	-0.0523672	-0.513267	-0.146643	-0.107188	-0.0564479	-0.0511988	-0.144209
sp|O14772|FPGT_HUMAN	FPGT	FPGT_HUMAN Fucose-1-phosphate guanylyltransferase	27	6.34416	6.10313	5.96462	6.29104	6.25472	6.54225	6.22725	6.33521	5.95975	6.21721	6.67031	6.95464	6.13276	5.90582	5.84056	6.25656	6.17574	1.02727	0.988243	0.965815	1.01867	1.01279	1.05935	1.00834	1.02582	0.965026	1.00672	1.08008	1.12612	0.993041	0.956294	0.945727	1.01309	0.0388177	-0.0170621	-0.0501812	0.0266871	0.0183339	0.0831755	0.0119838	0.036781	-0.0513596	0.00965588	0.111142	0.171364	-0.0100749
sp|Q13217|DNJC3_HUMAN	DNAJC3	DNJC3_HUMAN DnaJ homolog subfamily C member 3	25	6.44207	6.24245	6.03491	6.46459	6.17355	6.32537	6.3143	6.31356	5.90114	6.33248	6.6613	6.51189	5.86676	6.11315	6.08681	6.21568	6.29601	1.0232	0.991494	0.95853	1.02678	0.98055	1.00466	1.00291	1.00279	0.937283	1.00579	1.05802	1.03429	0.931823	0.970957	0.966773	0.987242	0.0330877	-0.0123243	-0.0611044	0.0381222	-0.0283364	0.00671319	0.00418612	0.00401703	-0.093443	0.00833393	0.0813671	0.0486396	-0.101873
sp|Q14147|DHX34_HUMAN	DHX34	DHX34_HUMAN Probable ATP-dependent RNA helicase DHX34	9	5.98528	6.07358	6.79339	6.11995	6.12177	5.48455	6.07855	5.44351	6.30173	6.45658	6.78862	6.88856	6.40937	6.37505	6.02801	6.6515	6.24305	0.958711	0.972855	1.08815	0.980282	0.980574	0.878505	0.973651	0.871931	1.0094	1.0342	1.08739	1.1034	1.02664	1.02114	0.965555	1.06542	-0.0608323	-0.0397039	0.121881	-0.0287312	-0.0283022	-0.186878	-0.0385238	-0.197714	0.0134969	0.0485192	0.120867	0.141951	0.0379315
sp|Q9H3S7|PTN23_HUMAN	PTPN23	PTN23_HUMAN Tyrosine-protein phosphatase non-receptor type 23	49	6.14587	6.42269	6.37295	6.4121	6.17013	5.65481	6.33086	5.97833	6.53474	6.51457	6.2711	6.18276	6.46035	6.25051	6.20491	6.09331	6.3384	0.969624	1.0133	1.00545	1.01163	0.973452	0.892151	0.99881	0.943192	1.03098	1.02779	0.989382	0.975445	1.01924	0.986133	0.978939	0.961332	-0.044502	0.0190584	0.00784207	0.0166776	-0.0388184	-0.164641	-0.00171778	-0.0843767	0.0440106	0.0395507	-0.0154008	-0.0358683	0.0274931
sp|O00459|P85B_HUMAN	PIK3R2	P85B_HUMAN Phosphatidylinositol 3-kinase regulatory subunit beta	16	6.08485	6.10355	6.22939	5.80791	6.28692	5.98843	6.16129	7.03575	6.56907	6.4264	6.39631	6.66487	6.47037	5.83951	6.12279	5.81259	6.05643	1.00469	1.00778	1.02856	0.958967	1.03806	0.988773	1.01731	1.1617	1.08464	1.06109	1.05612	1.10046	1.06835	0.964184	1.01096	0.959739	0.00675525	0.0111822	0.0406244	-0.0604474	0.053887	-0.0162886	0.024766	0.216238	0.117223	0.0855443	0.0787734	0.13811	0.0953818
sp|P27986-4|P85A_HUMAN	PIK3R1	P85A_HUMAN Isoform 4 of Phosphatidylinositol 3-kinase regulatory subunit alpha	17	6.15779	6.4919	5.86459	5.97954	6.28365	5.99791	6.03629	6.20887	6.42553	6.49015	6.44803	6.28197	6.23436	6.43308	6.37465	6.29169	6.12345	1.00561	1.06017	0.957726	0.976498	1.02616	0.979498	0.985765	1.01395	1.04933	1.05988	1.05301	1.02589	1.01811	1.05056	1.04102	1.02747	0.00806678	0.0842949	-0.0623156	-0.0343114	0.0372569	-0.029886	-0.0206838	0.0199848	0.0694696	0.0839059	0.0745126	0.0368712	0.0258956
sp|O00139-4|KIF2A_HUMAN	KIF2A	KIF2A_HUMAN Isoform 4 of Kinesin-like protein KIF2A	43	6.20675	6.41759	6.72857	5.75771	6.75515	6.38646	5.58071	6.22834	6.78633	6.34482	5.55742	5.87764	6.03068	6.73126	6.4093	6.20127	6.27766	0.988705	1.02229	1.07183	0.917175	1.07606	1.01733	0.88898	0.992144	1.08103	1.0107	0.88527	0.93628	0.960658	1.07226	1.02097	0.987832	-0.0163877	0.0318059	0.100074	-0.124731	0.105762	0.0247907	-0.169777	-0.011378	0.112406	0.0153535	-0.17581	-0.0949887	-0.0579051
sp|O00139-2|KIF2A_HUMAN	KIF2A	KIF2A_HUMAN Isoform 2 of Kinesin-like protein KIF2A	1	5.98536	6.36343	7.4252	6.632	7.42421	5.20277	5.53006	5.65323	6.55023	6.54237	6.40839	5.73451	5.80687	7.15283	6.03278	5.55576	6.6015	0.906667	0.963937	1.12478	1.00462	1.12463	0.78812	0.837698	0.856356	0.992234	0.991043	0.970748	0.868668	0.879629	1.08352	0.91385	0.841591	-0.141355	-0.0529887	0.169637	0.00665068	0.169444	-0.343513	-0.255498	-0.223718	-0.0112478	-0.01298	-0.0428314	-0.203123	-0.185033
sp|Q99661|KIF2C_HUMAN	KIF2C	KIF2C_HUMAN Kinesin-like protein KIF2C	58	6.26031	6.36287	6.36759	6.36195	6.424	5.69796	6.19548	6.11607	6.43579	6.50309	6.27141	6.06915	6.2867	6.34413	6.19313	6.11036	6.33818	0.987714	1.0039	1.00464	1.00375	1.01354	0.89899	0.977486	0.964957	1.0154	1.02602	0.989465	0.957554	0.991878	1.00094	0.977115	0.964056	-0.0178345	0.00560901	0.00667881	0.0054004	0.0194033	-0.153623	-0.0328526	-0.0514637	0.0220486	0.0370568	-0.0152788	-0.0625742	-0.0117657
tr|B7Z6Q6|B7Z6Q6_HUMAN	KIF2C	B7Z6Q6_HUMAN Kinesin-like protein KIF2C	1	6.0576	6.37375	6.57254	6.27668	6.59976	5.62181	6.18319	6.20816	6.8057	6.28751	6.12267	5.77456	6.33127	6.69486	6.10075	5.9892	6.32014	0.958459	1.00848	1.03994	0.993123	1.04424	0.889507	0.978331	0.982282	1.07683	0.994837	0.968755	0.913676	1.00176	1.05929	0.965287	0.947637	-0.0612108	0.0121853	0.0564939	-0.00995543	0.0624565	-0.168922	-0.0316057	-0.0257913	0.106786	-0.0074683	-0.0457962	-0.130246	0.00253783
sp|P50583|AP4A_HUMAN	NUDT2	AP4A_HUMAN Bis(5'-nucleosyl)-tetraphosphatase [asymmetrical]	8	6.10567	6.20181	6.54941	6.52661	6.12695	5.3987	6.53507	5.87201	6.10981	6.40887	6.60619	6.2935	6.47726	6.10603	6.40261	6.27951	6.34587	0.962148	0.977298	1.03207	1.02848	0.965501	0.850742	1.02981	0.925327	0.9628	1.00993	1.04102	0.991747	1.0207	0.962205	1.00894	0.989542	-0.0556695	-0.0331298	0.0455458	0.0405147	-0.05065	-0.233207	0.0423836	-0.111965	-0.0546916	0.0142509	0.0579994	-0.0119565	0.0295646
sp|O95613|PCNT_HUMAN	PCNT	PCNT_HUMAN Pericentrin	45	5.80325	6.62808	6.99688	6.12784	6.05892	5.29986	5.76238	6.42323	7.2453	6.10063	6.04812	5.96779	6.43335	6.60231	6.39005	6.11201	6.38901	0.908317	1.03742	1.09514	0.959122	0.948334	0.829527	0.90192	1.00536	1.13403	0.954863	0.946644	0.934071	1.00694	1.03339	1.00016	0.956644	-0.138732	0.0529981	0.131119	-0.0602143	-0.0765323	-0.269639	-0.148928	0.00770599	0.181452	-0.0666347	-0.0791062	-0.0983962	0.00997722
sp|O95202|LETM1_HUMAN	LETM1	LETM1_HUMAN LETM1 and EF-hand domain-containing protein 1, mitochondrial	55	6.72647	6.13697	6.22296	6.3675	6.5788	6.44437	6.44627	5.87133	5.88377	6.18186	6.4915	6.261	6.26538	5.79617	6.18263	6.14301	6.36348	1.05704	0.964405	0.977919	1.00063	1.03384	1.01271	1.01301	0.922661	0.924616	0.97146	1.02012	0.983896	0.984585	0.91085	0.971581	0.965355	0.0800348	-0.0522883	-0.0322138	0.000912239	0.0480096	0.0182245	0.0186498	-0.116127	-0.113074	-0.0417738	0.0287371	-0.0234217	-0.0224128
sp|P02549|SPTA1_HUMAN	SPTA1	SPTA1_HUMAN Spectrin alpha chain, erythrocytic 1	122	6.15614	6.67196	6.66084	5.90061	6.33946	5.5082	6.00604	6.09177	7.28493	6.07129	5.68964	5.70067	6.65658	6.55743	6.46606	6.23839	6.34739	0.96987	1.05113	1.04938	0.929612	0.998751	0.86779	0.946222	0.959729	1.14771	0.956502	0.896375	0.898113	1.04871	1.03309	1.0187	0.982828	-0.0441369	0.0719477	0.0695412	-0.105299	-0.00180296	-0.204582	-0.0797488	-0.0593014	0.198752	-0.0641598	-0.157826	-0.155031	0.0686182
sp|P62851|RS25_HUMAN	RPS25	RS25_HUMAN 40S ribosomal protein S25	58	6.38769	6.18483	6.55389	6.25628	6.64793	6.78782	5.94127	7.22955	6.02004	5.94075	5.5121	5.72398	6.18475	6.51301	6.12915	5.98694	6.34567	1.00662	0.974653	1.03281	0.985913	1.04763	1.06968	0.936271	1.13929	0.948684	0.936189	0.868639	0.902029	0.974641	1.02637	0.965879	0.943468	0.00952123	-0.0370391	0.0465784	-0.020468	0.0671321	0.0971752	-0.0950017	0.188133	-0.076	-0.095128	-0.203171	-0.148754	-0.0370578
sp|Q15751|HERC1_HUMAN	HERC1	HERC1_HUMAN Probable E3 ubiquitin-protein ligase HERC1	86	6.37613	6.18915	6.27334	6.467	6.40878	5.99654	6.2965	5.99724	6.20353	6.31491	6.46838	6.39424	6.16814	6.22084	6.06835	6.15689	6.3264	1.00786	0.978304	0.991612	1.02222	1.01302	0.947859	0.995273	0.94797	0.980577	0.998183	1.02244	1.01072	0.974983	0.983314	0.95921	0.973205	0.0112951	-0.0316446	-0.0121522	0.0317107	0.0186638	-0.0772556	-0.00683581	-0.0770872	-0.0282965	-0.00262374	0.0320185	0.015387	-0.0365504
sp|O96013|PAK4_HUMAN	PAK4	PAK4_HUMAN Serine/threonine-protein kinase PAK 4	17	6.42887	6.10205	6.26261	6.40438	6.49583	6.10281	6.41315	6.60948	5.6247	6.31319	6.18525	6.05652	5.91902	7.08551	5.89339	6.10324	6.29948	1.02054	0.96866	0.994148	1.01665	1.03117	0.96878	1.01804	1.04921	0.892884	1.00218	0.981867	0.961432	0.939605	1.12478	0.935536	0.968849	0.029333	-0.0459382	-0.00846813	0.0238267	0.0442817	-0.0457585	0.025801	0.0693046	-0.163456	0.003137	-0.0264003	-0.0567431	-0.0898738
sp|Q32P41|TRM5_HUMAN	TRMT5	TRM5_HUMAN tRNA (guanine(37)-N1)-methyltransferase	23	6.08865	6.44181	6.34703	6.28964	6.06315	5.31845	6.24007	6.13811	6.65323	6.41193	6.56024	6.42287	6.31719	6.04475	6.45388	6.20899	6.29178	0.967715	1.02384	1.00878	0.999659	0.963662	0.845301	0.991781	0.975576	1.05745	1.0191	1.04267	1.02083	1.00404	0.960737	1.02576	0.986841	-0.0473464	0.0339973	0.0126129	-0.000491355	-0.0534013	-0.242463	-0.0119066	-0.0356743	0.0805861	0.0272899	0.0602798	0.0297493	0.00581417
sp|Q8WZA9|IRGQ_HUMAN	IRGQ	IRGQ_HUMAN Immunity-related GTPase family Q protein	18	6.20565	5.96187	6.28391	6.59665	6.20492	6.19949	6.5374	5.52035	6.11368	6.54021	6.63574	6.5337	6.22187	5.99982	6.21443	6.23029	6.26202	0.990998	0.952068	1.0035	1.05344	0.990882	0.990014	1.04398	0.881561	0.976311	1.04442	1.05968	1.04339	0.993588	0.958129	0.9924	0.994933	-0.0130458	-0.0708632	0.0050344	0.0751054	-0.0132155	-0.0144786	0.0620889	-0.181868	-0.0345871	0.0627088	0.0836292	0.0612721	-0.00927986
sp|O43524|FOXO3_HUMAN	FOXO3	FOXO3_HUMAN Forkhead box protein O3	4	5.77777	6.27988	6.6226	6.43521	5.98024	6.09	6.59569	5.8417	6.31448	6.45684	6.71831	6.52517	5.99431	6.14667	6.12081	6.10033	6.27886	0.920193	1.00016	1.05474	1.0249	0.95244	0.969921	1.05046	0.930375	1.00567	1.02835	1.06999	1.03923	0.954681	0.978946	0.974827	0.971566	-0.119991	0.000233198	0.0768939	0.0354834	-0.0703004	-0.0440616	0.0710198	-0.104116	0.00816014	0.0403245	0.0975946	0.0555117	-0.0669101
sp|Q9UNQ2|DIM1_HUMAN	DIMT1	DIM1_HUMAN Probable dimethyladenosine transferase	28	6.33892	6.3231	6.61813	5.49231	6.8921	6.78297	5.38074	6.08019	6.85781	6.1518	5.48564	5.85108	6.04878	6.90469	6.41718	6.37454	6.19311	1.02354	1.02099	1.06863	0.886841	1.11286	1.09524	0.868826	0.981766	1.10733	0.993329	0.885764	0.944772	0.976694	1.1149	1.03618	1.02929	0.0335718	0.0299668	0.0957584	-0.173252	0.154278	0.131252	-0.202861	-0.0265488	0.147083	-0.00965663	-0.175005	-0.0819623	-0.034021
sp|P78527|PRKDC_HUMAN	PRKDC	PRKDC_HUMAN DNA-dependent protein kinase catalytic subunit	429	6.42639	6.18465	6.07465	6.11893	6.6494	6.06098	6.56761	5.98717	6.23509	6.24633	6.45705	6.23684	6.31776	6.10781	6.20617	6.12318	6.20115	1.03632	0.997338	0.9796	0.98674	1.07228	0.977395	1.05909	0.965493	1.00547	1.00728	1.04127	1.00575	1.0188	0.984947	1.00081	0.987426	0.0514716	-0.003845	-0.0297357	-0.0192576	0.100687	-0.0329859	0.0828315	-0.0506627	0.00787343	0.0104718	0.0583382	0.0082783	0.0268762
sp|O95831|AIFM1_HUMAN	AIFM1	AIFM1_HUMAN Apoptosis-inducing factor 1, mitochondrial	76	6.44491	5.9613	6.07265	6.49655	6.1342	6.86644	6.62048	6.10652	5.66651	6.43805	6.51519	6.47557	6.09664	5.85132	6.1678	6.08587	6.24385	1.0322	0.954747	0.972581	1.04047	0.982438	1.09971	1.06032	0.978005	0.907534	1.0311	1.04346	1.03711	0.976423	0.937133	0.98782	0.974698	0.0457238	-0.0668095	-0.0401102	0.0572373	-0.0255613	0.137126	0.0844994	-0.032086	-0.139976	0.0441873	0.0613708	0.0525707	-0.0344221
sp|Q13362-4|2A5G_HUMAN	PPP2R5C	2A5G_HUMAN Isoform 4 of Serine/threonine-protein phosphatase 2A 56 kDa regulatory subunit gamma isoform	18	6.14764	6.04096	5.99239	6.25144	6.31915	6.06141	6.33663	6.41429	6.21878	6.46888	6.38022	6.40037	6.27036	6.3695	6.25632	6.07166	6.10811	1.00647	0.989007	0.981055	1.02347	1.03455	0.992355	1.03741	1.05013	1.01812	1.05906	1.04455	1.04785	1.02656	1.04279	1.02426	0.994033	0.00930723	-0.0159476	-0.0275939	0.0334631	0.0490051	-0.011072	0.0529903	0.0705641	0.0259061	0.0827905	0.0628807	0.0674299	0.0378228
sp|Q13362-2|2A5G_HUMAN	PPP2R5C	2A5G_HUMAN Isoform Gamma-1 of Serine/threonine-protein phosphatase 2A 56 kDa regulatory subunit gamma isoform	1	6.30443	6.03748	6.26299	6.58668	6.96924	5.29779	6.54002	6.22342	6.1721	6.13762	6.36672	5.81639	6.53982	6.30299	6.51982	5.92249	6.2979	1.00104	0.95865	0.994458	1.04585	1.1066	0.8412	1.03845	0.988175	0.980026	0.974551	1.01093	0.923545	1.03841	1.00081	1.03524	0.940392	0.00149623	-0.0609232	-0.00801813	0.0646818	0.146132	-0.249479	0.0544253	-0.0171621	-0.0291083	-0.0371904	0.0156806	-0.114746	0.0543812
sp|Q14738|2A5D_HUMAN	PPP2R5D	2A5D_HUMAN Serine/threonine-protein phosphatase 2A 56 kDa regulatory subunit delta isoform	25	6.33482	6.14998	6.1986	6.12254	6.3434	5.57675	6.23929	6.05593	6.62362	6.69557	6.44895	6.21478	6.40031	6.33908	6.2223	6.03409	6.20148	1.0215	0.991695	0.999535	0.98727	1.02288	0.89926	1.0061	0.976529	1.06807	1.07967	1.0399	1.00214	1.03206	1.02219	1.00336	0.973007	0.0306899	-0.012032	-0.000671314	-0.0184834	0.0326426	-0.153189	0.00876814	-0.0342652	0.0950062	0.110593	0.0564506	0.0030896	0.0455281
sp|P18850|ATF6A_HUMAN	ATF6	ATF6A_HUMAN Cyclic AMP-dependent transcription factor ATF-6 alpha	5	6.24453	5.73186	6.91933	6.30313	5.64498	6.16963	6.49647	6.97253	7.18186	5.87393	5.5319	5.53372	6.13614	6.96919	6.19611	6.09471	6.29971	0.99124	0.909861	1.09836	1.00054	0.896069	0.979351	1.03123	1.1068	1.14003	0.932412	0.878119	0.878408	0.974035	1.10627	0.983554	0.967458	-0.012693	-0.136283	0.135346	0.000782428	-0.158318	-0.030102	0.04437	0.146396	0.189072	-0.10096	-0.187511	-0.187036	-0.0379546
sp|Q9UIA9|XPO7_HUMAN	XPO7	XPO7_HUMAN Exportin-7	70	6.59305	6.2755	5.95007	6.00855	6.56406	6.2961	6.51088	6.17753	6.13464	6.20446	6.60075	6.22748	6.24711	6.02893	6.17583	6.00508	6.20679	1.06223	1.01107	0.958638	0.96806	1.05756	1.01439	1.04899	0.995285	0.988375	0.999624	1.06347	1.00333	1.0065	0.971344	0.995012	0.967501	0.0870981	0.0158825	-0.0609413	-0.046831	0.0807405	0.0206105	0.0690046	-0.0068178	-0.0168692	-0.000542264	0.088782	0.00480057	0.00934102
sp|Q14978-2|NOLC1_HUMAN	NOLC1	NOLC1_HUMAN Isoform Beta of Nucleolar and coiled-body phosphoprotein 1	26	6.38622	6.98345	6.86209	5.82893	5.91732	7.05286	6.35761	6.40886	6.43095	5.71321	5.16703	5.45002	6.32177	6.07348	6.24057	6.80565	6.51517	0.980207	1.07187	1.05325	0.89467	0.908237	1.08253	0.975816	0.983682	0.987073	0.876908	0.793076	0.836512	0.970315	0.932206	0.957852	1.04458	-0.0288411	0.100137	0.0748447	-0.160572	-0.138859	0.114405	-0.0353189	-0.0237356	-0.0187715	-0.189502	-0.334468	-0.257542	-0.0434748
sp|P61201-2|CSN2_HUMAN	COPS2	CSN2_HUMAN Isoform 2 of COP9 signalosome complex subunit 2	33	6.5066	6.14954	6.03698	6.35399	6.29495	6.49402	6.38702	6.10161	5.81359	6.27685	6.50571	6.50754	6.12352	6.2046	6.0287	6.21479	6.26178	1.0391	0.982076	0.9641	1.01473	1.0053	1.03709	1.02	0.974421	0.928425	1.00241	1.03896	1.03925	0.97792	0.990869	0.962778	0.992496	0.0553316	-0.0260937	-0.0527452	0.0210906	0.00762267	0.0525396	0.0285707	-0.0373823	-0.107143	0.00346849	0.0551343	0.05554	-0.032211
sp|P55084|ECHB_HUMAN	HADHB	ECHB_HUMAN Trifunctional enzyme subunit beta, mitochondrial	45	5.98087	6.54888	6.65201	6.17997	6.52817	5.55013	6.37077	5.73755	6.78539	6.3724	5.92705	5.75628	6.49036	6.46324	6.46842	6.18851	6.34043	0.943291	1.03288	1.04914	0.974692	1.02961	0.875355	1.00478	0.904915	1.07018	1.00504	0.934802	0.907869	1.02365	1.01937	1.02019	0.976039	-0.0842259	0.0466669	0.0692091	-0.0369814	0.0420974	-0.19206	0.0068865	-0.144146	0.0978505	0.00725557	-0.097267	-0.139444	0.0337172
sp|Q9BUE6|ISCA1_HUMAN	ISCA1	ISCA1_HUMAN Iron-sulfur cluster assembly 1 homolog, mitochondrial	4	6.19071	5.98414	6.32511	6.06863	6.40809	6.23653	6.34234	5.90789	6.15835	6.80016	6.27591	6.36546	6.35674	6.10628	6.27274	6.20094	6.14215	1.00791	0.974275	1.02979	0.988031	1.0433	1.01537	1.03259	0.961861	1.00264	1.10713	1.02178	1.03636	1.03494	0.99416	1.02126	1.00957	0.0113617	-0.0375992	0.0423474	-0.0173723	0.0611513	0.0220004	0.0462721	-0.0561002	0.0038007	0.146826	0.0310815	0.0515216	0.0495439
sp|P15336|ATF2_HUMAN	ATF2	ATF2_HUMAN Cyclic AMP-dependent transcription factor ATF-2	6	6.20885	6.06482	6.13148	6.48252	6.57367	6.7408	5.97636	5.68482	5.96987	6.12324	6.32253	6.53493	6.14585	6.31474	6.47064	6.25486	6.22192	0.9979	0.974751	0.985465	1.04188	1.05653	1.0834	0.960533	0.913677	0.95949	0.98414	1.01617	1.05031	0.987774	1.01492	1.03998	1.00529	-0.00303319	-0.0368944	-0.0211239	0.0591955	0.0793398	0.115561	-0.0580922	-0.130245	-0.0596597	-0.023064	0.0231427	0.0708125	-0.0177467
sp|O00231-2|PSD11_HUMAN	PSMD11	PSD11_HUMAN Isoform 2 of 26S proteasome non-ATPase regulatory subunit 11	69	6.48429	6.21875	6.33193	6.37003	6.53238	6.07095	6.401	6.08691	5.89176	6.1916	6.23152	6.15551	6.33736	6.23525	6.26847	6.19229	6.35125	1.02095	0.979138	0.996958	1.00296	1.02852	0.955867	1.00783	0.95838	0.927654	0.974863	0.981149	0.969181	0.997813	0.981736	0.986966	0.974972	0.0299081	-0.0304159	-0.00439525	0.00425961	0.0405682	-0.0651183	0.0112567	-0.0613305	-0.108342	-0.0367283	-0.0274564	-0.0451622	-0.00315859
sp|Q96GQ5|CP058_HUMAN	C16orf58	CP058_HUMAN UPF0420 protein C16orf58	10	6.3377	5.77678	6.63895	6.80272	6.21215	5.76392	6.55481	6.04059	5.70977	6.28919	6.78746	6.23553	6.15235	6.69943	5.96936	6.02928	6.38904	0.991965	0.904171	1.03912	1.06475	0.972314	0.902158	1.02595	0.945462	0.893682	0.984372	1.06236	0.975973	0.962954	1.04858	0.934313	0.943691	-0.0116392	-0.145333	0.0553565	0.0905131	-0.0405059	-0.148548	0.0369554	-0.0809091	-0.162166	-0.0227244	0.0872732	-0.0350864	-0.054461
sp|Q9H6S0|YTDC2_HUMAN	YTHDC2	YTDC2_HUMAN Probable ATP-dependent RNA helicase YTHDC2	33	5.6288	6.71576	7.02764	5.65116	6.16136	5.82243	5.23281	6.09412	7.77258	6.13076	5.18906	5.78285	6.62282	7.12744	6.54767	6.49274	6.25584	0.899767	1.07352	1.12337	0.903342	0.984897	0.930719	0.836468	0.974149	1.24245	0.980006	0.829475	0.924392	1.05866	1.13933	1.04665	1.03787	-0.152376	0.102347	0.167837	-0.146657	-0.0219548	-0.103582	-0.257618	-0.0377857	0.31319	-0.0291377	-0.26973	-0.113423	0.082242
sp|Q9BUF5|TBB6_HUMAN	TUBB6	TBB6_HUMAN Tubulin beta-6 chain	109	6.23615	5.93131	6.24996	6.73887	6.05109	6.32112	6.48767	6.06774	5.84656	6.22534	6.75261	6.75353	6.21883	5.7878	6.09952	6.23191	6.28907	0.991585	0.943114	0.993781	1.07152	0.962159	1.0051	1.03158	0.964807	0.929638	0.989866	1.07371	1.07385	0.988831	0.920295	0.96986	0.990911	-0.0121916	-0.0844965	-0.00900031	0.0996594	-0.0556522	0.00733294	0.0448532	-0.051688	-0.105259	-0.0146946	0.102598	0.102795	-0.0162041
sp|Q13509|TBB3_HUMAN	TUBB3	TBB3_HUMAN Tubulin beta-3 chain	209	6.34855	6.15978	6.17123	6.28795	6.17388	6.66875	6.34057	5.33006	6.08877	6.49218	6.95759	6.87244	6.2373	5.25734	6.32196	6.29164	6.24188	1.01709	0.986847	0.988682	1.00738	0.989106	1.06839	1.01581	0.853919	0.975471	1.0401	1.11466	1.10102	0.999267	0.842269	1.01283	1.00797	0.0244471	-0.0191012	-0.016422	0.0106097	-0.0158026	0.0954363	0.0226325	-0.227828	-0.0358292	0.056723	0.156608	0.138842	-0.00105839
sp|Q13885|TBB2A_HUMAN	TUBB2A	TBB2A_HUMAN Tubulin beta-2A chain	155	6.42352	6.33609	5.96902	6.01648	5.92253	6.35791	6.27969	5.4898	5.81448	5.96851	7.46209	6.76886	6.30109	6.15167	6.4657	6.27257	6.18628	1.03835	1.02422	0.964881	0.972553	0.957366	1.02774	1.0151	0.887416	0.9399	0.964798	1.20623	1.09417	1.01856	0.994406	1.04517	1.01395	0.0542925	0.0345213	-0.0515775	-0.0401519	-0.0628579	0.039481	0.0216218	-0.172318	-0.0894214	-0.0517007	0.270508	0.129841	0.0265299
sp|Q9BVA1|TBB2B_HUMAN	TUBB2B	TBB2B_HUMAN Tubulin beta-2B chain	1	7.03112	6.65109	5.67694	6.74291	5.78309	6.044	6.25969	6.4457	5.68833	6.8136	6.25576	6.6624	5.67657	6.35276	5.61476	6.30129	6.52552	1.07748	1.01924	0.86996	1.03331	0.886227	0.92621	0.959264	0.987769	0.871706	1.04415	0.958662	1.02098	0.869904	0.973526	0.860432	0.965639	0.107663	0.027499	-0.200978	0.0472796	-0.174251	-0.110588	-0.0600006	-0.0177547	-0.198087	0.0623255	-0.0609066	0.0299502	-0.201072
sp|P07437|TBB5_HUMAN	TUBB	TBB5_HUMAN Tubulin beta chain	72	6.34199	6.29111	6.37522	6.66747	6.20407	6.04206	6.5501	6.21053	5.77439	6.14577	6.48471	6.41769	6.24425	6.12797	6.1204	6.00226	6.41895	0.988011	0.980084	0.993188	1.03872	0.966524	0.941285	1.02043	0.967531	0.899585	0.957442	1.01025	0.999804	0.972784	0.954669	0.95349	0.935085	-0.0174012	-0.0290222	-0.00986163	0.0548027	-0.0491218	-0.0872963	0.0291802	-0.0476204	-0.152668	-0.062743	0.0147053	-0.000282658	-0.0398085
sp|Q9H4B7|TBB1_HUMAN	TUBB1	TBB1_HUMAN Tubulin beta-1 chain	88	6.47136	6.0225	6.28603	6.62019	6.18457	6.15062	6.63271	5.77462	5.77349	6.27498	6.75962	6.52386	6.18502	5.93347	6.19168	6.21529	6.35002	1.01911	0.948422	0.989923	1.04255	0.973945	0.968599	1.04452	0.909386	0.909208	0.988183	1.0645	1.02738	0.974016	0.934402	0.975065	0.978783	0.0273078	-0.0763986	-0.014612	0.0601115	-0.0380878	-0.0460293	0.0628373	-0.137035	-0.137317	-0.0171503	0.090181	0.0389647	-0.0379829
sp|P68371|TBB4B_HUMAN	TUBB4B	TBB4B_HUMAN Tubulin beta-4B chain	116	5.73275	6.34007	6.60088	6.50645	6.39222	6.64915	6.68083	3.87529	5.87117	6.57297	6.9901	6.87443	6.60841	5.37417	6.50712	6.42399	6.29504	0.910678	1.00715	1.04858	1.03358	1.01544	1.05625	1.06129	0.61561	0.932666	1.04415	1.11041	1.09204	1.04978	0.853715	1.03369	1.02048	-0.134988	0.0102838	0.0684434	0.0476556	0.0221021	0.078955	0.0858124	-0.699911	-0.100567	0.0623304	0.151098	0.127025	0.0700882
sp|P04350|TBB4A_HUMAN	TUBB4A	TBB4A_HUMAN Tubulin beta-4A chain	1	7.45981	6.76802	6.60892	6.60043	6.12226	5.51379	7.02222	6.62075	5.84285	6.70426	6.73024	6.2219	6.50002	4.31827	4.98056	5.98569	6.8593	1.08755	0.986693	0.963498	0.962261	0.892549	0.803842	1.02375	0.965223	0.851815	0.977398	0.981185	0.907076	0.947622	0.62955	0.726104	0.872639	0.121079	-0.0193265	-0.0536458	-0.0555003	-0.163996	-0.315016	0.0338669	-0.0510656	-0.231388	-0.0329822	-0.0274024	-0.140705	-0.0776161
tr|M0R042|M0R042_HUMAN	TUBB4A	M0R042_HUMAN Tubulin beta-4A chain (Fragment)	1	5.48636	5.74105	6.17594	6.69838	6.33075	5.65119	7.15707	6.84882	5.05857	6.67714	5.98372	8.32481	7.26052	5.786	5.00904	5.81063	6.02543	0.910534	0.952803	1.02498	1.11168	1.05067	0.93789	1.18781	1.13665	0.839536	1.10816	0.993077	1.38161	1.20498	0.960263	0.831316	0.964351	-0.135216	-0.0697502	0.0355939	0.152747	0.0713116	-0.0925101	0.248304	0.184791	-0.252335	0.148165	-0.0100221	0.466353	0.269008
tr|K7ES63|K7ES63_HUMAN	TUBB6	K7ES63_HUMAN Tubulin beta-6 chain (Fragment)	2	6.35873	4.95216	5.3102	6.0371	5.9888	6.85868	7.12779	9.74985	5.58573	5.52565	6.82355	6.00727	5.35655	9.35131	4.39484	4.57177	5.66455	1.12255	0.874238	0.937445	1.06577	1.05724	1.21081	1.25832	1.72121	0.986086	0.97548	1.20461	1.0605	0.945627	1.65085	0.77585	0.807085	0.166778	-0.193903	-0.0931945	0.091895	0.0803062	0.27597	0.331494	0.783419	-0.0202149	-0.0358165	0.268562	0.0847488	-0.0806566
tr|M0QYM7|M0QYM7_HUMAN	TUBB4A	M0QYM7_HUMAN Tubulin beta-4A chain (Fragment)	1	5.26521	5.89861	4.79147	5.43393	6.22655	4.2418	6.88018	16.1765	4.87687	5.91956	7.11957	5.50818	4.81404	7.17239	4.63612	5.039	5.34731	0.984647	1.1031	0.896053	1.0162	1.16443	0.793259	1.28666	3.02517	0.912024	1.10702	1.33143	1.03009	0.900274	1.34131	0.867001	0.942344	-0.0223209	0.141563	-0.158344	0.023184	0.219621	-0.334135	0.363634	1.59702	-0.132856	0.146678	0.412978	0.0427637	-0.151564
sp|A6NKZ8|YI016_HUMAN		YI016_HUMAN Putative tubulin beta chain-like protein ENSP00000290377	2	6.11707	6.12153	3.74562	6.1039	5.84685	7.08404	4.68679	8.66418	7.28369	7.65101	5.85113	7.89276	5.91098	5.56006	5.10038	6.38001	5.52203	1.10776	1.10857	0.678305	1.10537	1.05882	1.28287	0.848744	1.56902	1.31902	1.38554	1.0596	1.42932	1.07044	1.00689	0.923642	1.15537	0.147642	0.148694	-0.559994	0.144533	0.0824609	0.359374	-0.236599	0.649864	0.399471	0.470451	0.0835165	0.515331	0.0981986
sp|Q8N3Y3|LARG2_HUMAN	GYLTL1B	LARG2_HUMAN Glycosyltransferase-like protein LARGE2	1	7.18626	5.31621	7.11721	7.57202	5.62439	6.55302	6.44641	4.44057	6.0825	6.19071	7.14382	6.50893	4.79003	4.73908	7.06636	7.22248	6.79792	1.05713	0.782034	1.04697	1.11387	0.827369	0.963974	0.948291	0.653224	0.894758	0.910676	1.05088	0.957488	0.704631	0.697136	1.03949	1.06245	0.0801467	-0.354696	0.0662174	0.155584	-0.273398	-0.0529345	-0.0765985	-0.61435	-0.16043	-0.13499	0.0716013	-0.062674	-0.50506
sp|Q9UJX2|CDC23_HUMAN	CDC23	CDC23_HUMAN Cell division cycle protein 23 homolog	35	6.22961	6.0645	6.21475	6.26047	6.3982	6.35016	5.8919	6.36064	6.41771	6.34194	6.44155	6.48601	6.09687	6.09789	6.23166	6.11614	6.19233	1.00602	0.979356	1.00362	1.011	1.03325	1.02549	0.951483	1.02718	1.0364	1.02416	1.04025	1.04743	0.984584	0.984748	1.00635	0.987696	0.00865891	-0.0300942	0.00521342	0.015788	0.0471832	0.03631	-0.07175	0.038689	0.0515757	0.0344413	0.0569249	0.0668483	-0.0224142
sp|O95248-4|MTMR5_HUMAN	SBF1	MTMR5_HUMAN Isoform 4 of Myotubularin-related protein 5	15	5.94701	6.06174	6.75077	6.03966	6.81067	5.9755	5.90581	6.15408	6.68672	6.0358	5.70539	6.38006	6.1715	6.84986	6.38904	6.13639	6.19979	0.959227	0.977732	1.08887	0.974171	1.09853	0.963822	0.952581	0.992626	1.07854	0.973548	0.920255	1.02908	0.995436	1.10485	1.03052	0.989773	-0.060056	-0.0324885	0.122832	-0.0377532	0.135576	-0.0531611	-0.0700856	-0.0106773	0.109078	-0.0386755	-0.119895	0.0413495	-0.00659933
sp|Q14534|ERG1_HUMAN	SQLE	ERG1_HUMAN Squalene monooxygenase	19	6.53998	6.0685	6.25737	6.78642	6.36441	6.00298	6.60489	6.07004	6.01072	6.29706	6.41763	6.3472	6.05662	6.25314	5.89363	6.02939	6.41307	1.01979	0.946271	0.975722	1.05822	0.992413	0.936054	1.02991	0.946511	0.937261	0.981911	1.00071	0.989729	0.944419	0.975062	0.919003	0.940173	0.0282716	-0.0796746	-0.0354582	0.0816361	-0.0109878	-0.0953357	0.0425199	-0.0793086	-0.0934768	-0.0263362	0.00102602	-0.0148943	-0.0825017
sp|Q86UY6|NAA40_HUMAN	NAA40	NAA40_HUMAN N-alpha-acetyltransferase 40	6	6.22397	6.56834	6.87762	6.1636	6.41262	5.20791	5.93378	5.29126	6.72994	6.28492	6.07698	5.86158	6.7363	6.58247	6.81056	6.23814	6.45838	0.963704	1.01703	1.06491	0.954357	0.992914	0.80638	0.918772	0.819286	1.04205	0.973141	0.940945	0.907593	1.04303	1.01921	1.05453	0.965898	-0.0533378	0.0243559	0.0907365	-0.0673996	-0.010259	-0.310468	-0.122221	-0.287562	0.0594208	-0.0392785	-0.0878183	-0.139883	0.0607835
sp|Q16891-4|IMMT_HUMAN	IMMT	IMMT_HUMAN Isoform 4 of Mitochondrial inner membrane protein	93	6.58878	6.02414	6.1844	6.36721	6.52079	6.29216	6.51052	6.20435	5.91297	6.20409	6.44325	6.23768	6.2562	6.09313	6.11534	6.04498	6.29113	1.04731	0.957561	0.983034	1.01209	1.0365	1.00016	1.03487	0.986206	0.93989	0.986164	1.02418	0.991504	0.994447	0.968527	0.972057	0.960873	0.0666916	-0.0625644	-0.0246861	0.0173416	0.051727	0.000235609	0.049453	-0.0200397	-0.0894368	-0.0201001	0.0344688	-0.0123102	-0.00803311
sp|Q16891-2|IMMT_HUMAN	IMMT	IMMT_HUMAN Isoform 2 of Mitochondrial inner membrane protein	3	6.85893	6.22554	5.57145	7.71978	6.40488	5.93125	6.57972	6.43248	5.52679	6.23589	6.07606	6.14909	6.14435	5.86486	6.21645	6.06248	6.59392	1.04019	0.944133	0.844937	1.17074	0.97133	0.899502	0.997846	0.975516	0.838164	0.945702	0.921463	0.932539	0.93182	0.889434	0.942754	0.919404	0.0568461	-0.0829385	-0.243085	0.227422	-0.0419659	-0.152801	-0.00311129	-0.0357624	-0.254696	-0.080542	-0.118001	-0.100765	-0.101877
sp|Q8IZ69|TRM2A_HUMAN	TRMT2A	TRM2A_HUMAN tRNA (uracil-5-)-methyltransferase homolog A	37	6.0395	6.58872	6.74162	6.30528	6.57768	5.79992	5.83925	5.83394	6.70542	6.3347	5.78262	5.75777	6.22107	6.83202	6.45474	6.18573	6.41878	0.940911	1.02648	1.0503	0.982318	1.02476	0.903586	0.909713	0.908886	1.04466	0.986901	0.900891	0.897019	0.969198	1.06438	1.0056	0.963692	-0.08787	0.0376991	0.0707962	-0.0257387	0.0352797	-0.146266	-0.136516	-0.137829	0.0630286	-0.0190228	-0.150576	-0.156789	-0.0451364
sp|Q96G03|PGM2_HUMAN	PGM2	PGM2_HUMAN Phosphoglucomutase-2	53	6.68266	5.84299	5.80628	6.03287	6.25875	6.73051	6.53126	6.46989	5.75472	6.28751	6.78521	6.52514	6.23969	5.99514	6.05727	6.00011	6.0912	1.0971	0.959251	0.953224	0.990424	1.02751	1.10496	1.07225	1.06217	0.94476	1.03223	1.11394	1.07124	1.02438	0.98423	0.99443	0.985046	0.133696	-0.0600197	-0.0691123	-0.013882	0.0391481	0.143989	0.100635	0.0870147	-0.0819807	0.0457623	0.155667	0.0992824	0.0347479
sp|Q6PCE3|PGM2L_HUMAN	PGM2L1	PGM2L_HUMAN Glucose 1,6-bisphosphate synthase	16	6.60794	6.32892	5.76488	6.45642	6.24819	6.4632	6.14318	6.32076	5.77936	6.38526	6.50482	6.71642	6.06258	6.07174	5.97162	6.17471	6.28954	1.05062	1.00626	0.916582	1.02653	0.993426	1.02761	0.97673	1.00496	0.918884	1.01522	1.03423	1.06787	0.963915	0.965371	0.949453	0.981743	0.0712461	0.00900483	-0.125664	0.0377799	-0.00951618	0.0392941	-0.0339689	0.00714353	-0.122045	0.0217909	0.0485546	0.0947379	-0.0530226
sp|Q96DX7|TRI44_HUMAN	TRIM44	TRI44_HUMAN Tripartite motif-containing protein 44	13	6.59301	6.20248	6.05837	6.56232	6.12861	6.26915	6.36525	5.99517	5.73705	6.356	6.58748	6.72001	6.22209	5.96028	6.04037	6.20234	6.35405	1.03761	0.976147	0.953467	1.03278	0.964521	0.986639	1.00176	0.94352	0.902897	1.00031	1.03674	1.0576	0.979233	0.938029	0.950634	0.976125	0.053262	-0.0348301	-0.0687456	0.0465306	-0.0521154	-0.0194055	0.00254187	-0.0838746	-0.147366	0.000443817	0.0520514	0.0807881	-0.030276
sp|P35222|CTNB1_HUMAN	CTNNB1	CTNB1_HUMAN Catenin beta-1	7	6.57575	5.92269	6.01126	5.73538	6.1075	5.63593	6.22232	5.91859	7.18698	7.40734	7.22499	7.06048	5.68086	5.62854	5.46924	6.21213	6.06127	1.08488	0.977137	0.991749	0.946234	1.00763	0.929827	1.02657	0.97646	1.18572	1.22208	1.19199	1.16485	0.937239	0.928607	0.902326	1.02489	0.117535	-0.0333675	-0.0119527	-0.079731	0.0109618	-0.104966	0.0378325	-0.0343666	0.245766	0.289335	0.253375	0.220146	-0.0935108
sp|O15111|IKKA_HUMAN	CHUK	IKKA_HUMAN Inhibitor of nuclear factor kappa-B kinase subunit alpha	17	6.18236	6.51683	6.63712	6.24389	6.48431	5.25989	6.34411	5.9884	6.72042	6.35473	6.00552	5.8359	6.53632	6.4832	6.33322	6.07378	6.39505	0.966741	1.01904	1.03785	0.976363	1.01396	0.822494	0.992034	0.936412	1.05088	0.993695	0.939089	0.912565	1.02209	1.01378	0.990332	0.949763	-0.048798	0.0272147	0.0536017	-0.0345105	0.0199974	-0.281923	-0.0115379	-0.094785	0.0715958	-0.00912481	-0.0906665	-0.132	0.031523
sp|O14920|IKKB_HUMAN	IKBKB	IKKB_HUMAN Inhibitor of nuclear factor kappa-B kinase subunit beta	19	5.9377	6.26683	6.53923	6.23166	6.36967	5.39682	6.28389	5.75998	6.96175	6.51405	6.30971	6.05129	6.37523	6.57173	6.32749	6.10296	6.24385	0.950967	1.00368	1.04731	0.998047	1.02015	0.864341	1.00641	0.922504	1.11498	1.04327	1.01055	0.969159	1.02104	1.05251	1.01339	0.977435	-0.0725328	0.00529882	0.0666837	-0.00282051	0.0287816	-0.210327	0.00922089	-0.116373	0.157013	0.0611178	0.0151367	-0.0451943	0.0300404
sp|Q13315|ATM_HUMAN	ATM	ATM_HUMAN Serine-protein kinase ATM	27	6.21073	6.02428	6.15471	6.45648	6.10559	6.01363	6.48782	6.44396	5.9323	6.25806	6.64277	6.83348	6.11945	6.10011	6.08283	6.1338	6.21155	0.999868	0.969851	0.990849	1.03943	0.982941	0.968137	1.04448	1.03742	0.955043	1.00749	1.06942	1.10012	0.985173	0.982059	0.979277	0.987483	-0.000190466	-0.0441645	-0.0132624	0.0557945	-0.0248226	-0.0467172	0.0627805	0.0529942	-0.0663618	0.0107622	0.0968316	0.137667	-0.0215513
sp|Q8N3U4-2|STAG2_HUMAN	STAG2	STAG2_HUMAN Isoform 2 of Cohesin subunit SA-2	51	6.3768	6.20959	6.3917	6.21311	6.30189	6.38809	6.20707	6.45126	6.05848	6.02924	6.13871	6.2334	6.1479	6.23947	6.26981	6.34349	6.2978	1.01254	0.985994	1.01491	0.986552	1.00065	1.01434	0.985593	1.02437	0.961999	0.957357	0.974739	0.989774	0.976198	0.990738	0.995556	1.00725	0.0179847	-0.0203499	0.0213518	-0.0195323	0.00093663	0.0205367	-0.0209355	0.034733	-0.0558921	-0.0628718	-0.0369124	-0.0148286	-0.0347542
sp|Q8WVM7|STAG1_HUMAN	STAG1	STAG1_HUMAN Cohesin subunit SA-1	3	5.9292	6.26254	7.09649	6.62023	6.17141	6.07246	5.54461	6.46662	6.67731	5.96708	6.06235	5.88381	6.3781	5.94077	6.32398	6.60303	6.47711	0.915408	0.966872	1.09563	1.0221	0.952802	0.937525	0.856031	0.99838	1.03091	0.921256	0.935965	0.9084	0.984713	0.917194	0.976358	1.01944	-0.127514	-0.0486034	0.131754	0.03153	-0.0697512	-0.0930703	-0.224265	-0.00233952	0.0439157	-0.118326	-0.0954742	-0.138601	-0.0222246
sp|Q8N3U4|STAG2_HUMAN	STAG2	STAG2_HUMAN Cohesin subunit SA-2	1	6.21519	7.35076	7.34211	6.9213	5.37724	5.44281	8.22903	6.31	5.3719	6.38917	6.31716	6.02128	4.93614	5.97769	5.80288	5.99534	6.95734	0.893328	1.05655	1.0553	0.99482	0.772887	0.782312	1.18278	0.906956	0.77212	0.918335	0.907985	0.865457	0.709487	0.859192	0.834066	0.861729	-0.162737	0.0793576	0.0776589	-0.00749279	-0.37167	-0.354184	0.242187	-0.140896	-0.373103	-0.122907	-0.13926	-0.208466	-0.495153
sp|Q9Y2V7|COG6_HUMAN	COG6	COG6_HUMAN Conserved oligomeric Golgi complex subunit 6	17	5.93564	6.42569	6.6602	6.40805	6.12009	5.32299	6.17504	6.43561	6.63679	6.2126	6.19501	6.40907	6.25124	6.18133	6.31403	6.31663	6.35739	0.933659	1.01074	1.04763	1.00797	0.962673	0.837291	0.971316	1.0123	1.04395	0.977224	0.974457	1.00813	0.983302	0.972305	0.993179	0.993588	-0.0990321	0.0154157	0.0671298	0.0114497	-0.0548829	-0.256199	-0.0419872	0.0176412	0.0620499	-0.0332386	-0.0373291	0.0116793	-0.0242933
sp|Q8IY67|RAVR1_HUMAN	RAVER1	RAVR1_HUMAN Ribonucleoprotein PTB-binding 1	21	6.26406	6.19309	6.56775	6.62169	5.88586	5.00014	6.47793	5.87502	6.23885	6.68094	6.3872	6.14434	6.62198	6.5494	6.28976	6.202	6.41165	0.976981	0.965912	1.02435	1.03276	0.917995	0.779853	1.01034	0.916304	0.973049	1.042	0.996187	0.958309	1.0328	1.02148	0.98099	0.967302	-0.0335971	-0.0500357	0.0347041	0.0465044	-0.123442	-0.358727	0.0148378	-0.126101	-0.039415	0.059356	-0.00551149	-0.0614371	0.0465675
tr|E9PAU2|E9PAU2_HUMAN	RAVER1	E9PAU2_HUMAN Ribonucleoprotein PTB-binding 1	15	6.15007	6.4261	6.65163	6.96291	5.91124	4.86061	6.3549	5.89024	6.38489	6.56543	6.63581	6.2387	6.3427	6.10402	6.37475	6.14601	6.54768	0.939275	0.981432	1.01588	1.06342	0.9028	0.742341	0.970558	0.899592	0.975138	1.00271	1.01346	0.952811	0.968695	0.932242	0.973589	0.938655	-0.0903804	-0.0270398	0.0227247	0.0887071	-0.147522	-0.429846	-0.0431138	-0.152657	-0.0363215	0.00390624	0.0192893	-0.0697378	-0.0458862
sp|Q9NX74|DUS2L_HUMAN	DUS2	DUS2L_HUMAN tRNA-dihydrouridine(20) synthase [NAD(P)+]-like	10	6.37653	6.22318	6.4435	6.62728	6.50534	5.91834	6.41847	5.83297	6.02602	6.44452	6.50883	6.30132	6.09233	6.12485	6.13449	6.02204	6.41762	0.993597	0.969702	1.00403	1.03267	1.01367	0.922201	1.00013	0.908899	0.93898	1.00419	1.01421	0.981878	0.949313	0.95438	0.955882	0.93836	-0.00926738	-0.044387	0.00580562	0.0463779	0.0195855	-0.116846	0.000190507	-0.137808	-0.0908335	0.00603398	0.0203593	-0.0263849	-0.0750448
sp|Q9H2U1|DHX36_HUMAN	DHX36	DHX36_HUMAN Probable ATP-dependent RNA helicase DHX36	29	6.03092	6.1313	6.76482	6.11709	6.47943	6.06886	5.78414	6.26393	6.83804	6.06966	5.8084	6.00559	6.16922	6.71714	6.43751	6.31396	6.26103	0.963247	0.979279	1.08046	0.97701	1.03488	0.969307	0.923832	1.00046	1.09216	0.969434	0.927706	0.959201	0.985336	1.07285	1.02819	1.00845	-0.0540225	-0.0302076	0.111651	-0.0335551	0.0494663	-0.044975	-0.114298	0.0006675	0.127182	-0.0447849	-0.10826	-0.0600946	-0.0213125
sp|Q7Z478|DHX29_HUMAN	DHX29	DHX29_HUMAN ATP-dependent RNA helicase DHX29	46	6.08002	6.3301	6.65064	5.89145	6.57062	6.56307	5.30481	6.03225	6.86469	6.3746	5.58997	6.18429	5.91411	6.92817	6.39911	6.3221	6.23805	0.974666	1.01476	1.06614	0.944437	1.05331	1.0521	0.850395	0.967009	1.10045	1.02189	0.896108	0.991382	0.94807	1.11063	1.02582	1.01347	-0.0370196	0.0211326	0.0923975	-0.0824729	0.0749338	0.0732751	-0.233795	-0.0483995	0.138099	0.0312391	-0.158255	-0.0124877	-0.0769346
sp|Q6P158|DHX57_HUMAN	DHX57	DHX57_HUMAN Putative ATP-dependent RNA helicase DHX57	34	6.10077	6.24684	6.3905	5.87192	6.40482	6.36519	5.67907	7.482	6.40849	6.12473	5.72476	6.07974	6.10606	6.62042	6.15908	6.23563	6.15251	0.991591	1.01533	1.03868	0.954395	1.04101	1.03457	0.92305	1.21609	1.04161	0.995485	0.930476	0.988173	0.992451	1.07605	1.00107	1.01351	-0.0121832	0.0219521	0.0547543	-0.0673422	0.0579835	0.0490291	-0.11552	0.282249	0.05881	-0.00652826	-0.103959	-0.0171649	-0.0109327
sp|Q5QJE6|TDIF2_HUMAN	DNTTIP2	TDIF2_HUMAN Deoxynucleotidyltransferase terminal-interacting protein 2	18	5.90541	6.83766	6.94907	5.39288	6.05869	6.72449	5.30839	6.49332	7.5848	5.96335	5.3268	5.68199	5.96905	6.54079	6.23842	7.02489	6.27126	0.941663	1.09032	1.10808	0.859936	0.966105	1.07227	0.846464	1.03541	1.20945	0.950902	0.849399	0.906037	0.951811	1.04298	0.994764	1.12017	-0.086717	0.124749	0.148066	-0.217698	-0.0497483	0.100671	-0.24048	0.0502021	0.274357	-0.0726312	-0.235485	-0.142358	-0.0712528
sp|P42765|THIM_HUMAN	ACAA2	THIM_HUMAN 3-ketoacyl-CoA thiolase, mitochondrial	15	6.56721	6.17599	6.34842	6.50041	6.22211	6.79003	6.85477	5.52176	5.57539	6.25672	6.73232	6.34402	6.27048	5.42485	6.18902	6.22649	6.39801	1.02645	0.965299	0.99225	1.01601	0.972507	1.06127	1.07139	0.863044	0.871426	0.977917	1.05225	0.991562	0.980068	0.847897	0.967336	0.973192	0.0376579	-0.0509523	-0.0112251	0.022908	-0.0402188	0.0857953	0.0994856	-0.212495	-0.19855	-0.0322161	0.0734811	-0.0122254	-0.0290468
sp|Q15398|DLGP5_HUMAN	DLGAP5	DLGP5_HUMAN Disks large-associated protein 5	40	6.15641	6.31668	6.46755	6.30285	6.35994	5.55289	6.37158	6.16776	6.57653	6.38096	6.40623	6.15799	6.26084	6.3356	6.02688	6.15932	6.31087	0.975524	1.00092	1.02483	0.998729	1.00778	0.879893	1.00962	0.977323	1.0421	1.01111	1.01511	0.975775	0.992072	1.00392	0.954999	0.975985	-0.0357502	0.00132701	0.0353798	-0.00183515	0.0111737	-0.184601	0.0138117	-0.0330928	0.0594871	0.015934	0.0216361	-0.03538	-0.0114832
sp|Q15398-3|DLGP5_HUMAN	DLGAP5	DLGP5_HUMAN Isoform 3 of Disks large-associated protein 5	1	7.4309	5.99526	6.84347	5.80735	4.51954	8.23675	6.61084	5.67042	5.71677	6.49998	6.89352	5.89545	6.17492	6.48078	6.12921	5.09486	6.51924	1.13984	0.919625	1.04973	0.890801	0.693261	1.26345	1.01405	0.869797	0.876907	0.997045	1.05741	0.904315	0.947183	0.9941	0.940172	0.781511	0.188832	-0.120883	0.0700231	-0.166825	-0.528529	0.33737	0.0201287	-0.201249	-0.189505	-0.00426962	0.080536	-0.145103	-0.0782844
sp|Q86V48|LUZP1_HUMAN	LUZP1	LUZP1_HUMAN Leucine zipper protein 1	16	5.9395	6.80236	7.25701	5.39644	6.14529	5.9325	5.22277	6.67172	7.51133	5.59436	4.55871	5.15823	6.61194	8.10313	6.63672	6.45797	6.34883	0.935527	1.07144	1.14305	0.84999	0.967941	0.934425	0.822635	1.05086	1.18311	0.881164	0.71804	0.81247	1.04144	1.27632	1.04535	1.01719	-0.0961487	0.0995452	0.192885	-0.234482	-0.0470091	-0.09785	-0.281675	0.0715686	0.242578	-0.182517	-0.477865	-0.299614	0.0585835
sp|P25787|PSA2_HUMAN	PSMA2	PSA2_HUMAN Proteasome subunit alpha type-2	26	6.46031	6.1331	6.21529	6.87225	6.00445	7.07402	6.58501	6.62361	5.23275	6.4115	6.44148	6.21068	6.08447	5.9419	5.8772	5.83199	6.42024	1.00624	0.955276	0.968078	1.0704	0.935238	1.10183	1.02566	1.03168	0.81504	0.998639	1.00331	0.96736	0.947702	0.925495	0.915418	0.908376	0.00897673	-0.0660102	-0.046805	0.0981559	-0.0965946	0.139904	0.036559	0.0449911	-0.295057	-0.00196475	0.00476553	-0.0478754	-0.0774951
sp|Q9P2N5|RBM27_HUMAN	RBM27	RBM27_HUMAN RNA-binding protein 27	30	6.26411	6.24549	6.52391	6.59359	6.4827	5.90984	6.16009	6.30809	6.33614	6.46049	5.86767	6.20622	5.94485	6.21456	6.14098	6.34126	6.40677	0.977732	0.974826	1.01828	1.02916	1.01185	0.922436	0.961496	0.984597	0.988975	1.00838	0.915854	0.968696	0.927901	0.969998	0.958513	0.989774	-0.0324888	-0.0367836	0.0261386	0.0414659	0.0169965	-0.116479	-0.0566469	-0.0223951	-0.0159941	0.0120453	-0.126811	-0.0458835	-0.107958
sp|Q5T8P6-2|RBM26_HUMAN	RBM26	RBM26_HUMAN Isoform 2 of RNA-binding protein 26	26	6.09545	6.10509	6.3191	6.49427	6.30322	5.79417	6.41007	6.29088	6.27084	6.51979	6.4159	6.39982	6.03119	6.31718	6.12638	6.10666	6.25348	0.97473	0.976271	1.01049	1.03851	1.00795	0.926552	1.02504	1.00598	1.00278	1.04259	1.02597	1.0234	0.964454	1.01019	0.979676	0.976522	-0.0369259	-0.0346461	0.0150604	0.0545087	0.0114303	-0.110057	0.0356814	0.00860316	0.00400003	0.0601668	0.036993	0.0333726	-0.052216
sp|Q5T8P6-3|RBM26_HUMAN	RBM26	RBM26_HUMAN Isoform 3 of RNA-binding protein 26	1	7.14746	6.02067	5.54349	6.50941	6.04339	6.10831	6.22768	6.21638	6.52446	6.48774	5.49156	5.28424	6.89869	6.34985	6.34899	6.7977	6.30526	1.13357	0.954865	0.879185	1.03238	0.958468	0.968765	0.987696	0.985904	1.03477	1.02894	0.870949	0.838069	1.09412	1.00707	1.00694	1.0781	0.180875	-0.0666312	-0.185761	0.0459715	-0.0611972	-0.045782	-0.0178605	-0.0204806	0.0493032	0.0411607	-0.199339	-0.254859	0.129767
sp|Q8WXI9|P66B_HUMAN	GATAD2B	P66B_HUMAN Transcriptional repressor p66-beta	17	6.08456	6.30052	6.62171	6.53726	6.22617	5.29309	6.42935	6.33118	6.37034	6.57313	6.41473	6.15439	5.9481	6.3176	6.21922	6.17868	6.38601	0.952795	0.986613	1.03691	1.02368	0.97497	0.828857	1.00679	0.991414	0.997546	1.0293	1.0045	0.96373	0.931426	0.989287	0.973882	0.967533	-0.0697624	-0.0194445	0.0522885	0.0337707	-0.0365704	-0.270805	0.00975751	-0.012441	-0.003545	0.0416651	0.00647317	-0.0532995	-0.102486
sp|Q86YP4-3|P66A_HUMAN	GATAD2A	P66A_HUMAN Isoform 3 of Transcriptional repressor p66-alpha	53	6.15015	6.32069	6.79583	6.49643	6.39533	5.49722	6.19701	6.02569	6.5392	6.5311	6.2844	6.09713	6.17323	5.9065	6.34551	6.24457	6.44077	0.954877	0.981356	1.05513	1.00864	0.992944	0.853503	0.962153	0.935554	1.01528	1.01402	0.975721	0.946645	0.958461	0.917048	0.985209	0.969537	-0.0666127	-0.0271522	0.0774155	0.0124128	-0.0102155	-0.228532	-0.055662	-0.0961078	0.0218799	0.0200917	-0.0354593	-0.079104	-0.0612088
sp|Q86Y07|VRK2_HUMAN	VRK2	VRK2_HUMAN Serine/threonine-protein kinase VRK2	19	6.27084	6.25683	6.36066	6.30961	6.29803	5.85791	6.19461	6.45317	6.4605	6.34659	6.1866	6.26398	5.9332	6.3571	6.27925	6.17113	6.29948	0.995453	0.993229	1.00971	1.00161	0.999769	0.929903	0.983352	1.0244	1.02556	1.00748	0.98208	0.994364	0.941855	1.00915	0.996788	0.979625	-0.00657518	-0.00980198	0.0139426	0.00231695	-0.00033326	-0.104848	-0.0242204	0.0347741	0.0364119	0.0107478	-0.0260871	-0.00815428	-0.0864235
sp|Q9Y6H3|ATP23_HUMAN	XRCC6BP1	ATP23_HUMAN Mitochondrial inner membrane protease ATP23 homolog	6	6.21141	6.85328	6.48766	6.97317	6.06675	5.68392	6.4271	6.66049	5.90231	6.47813	6.24822	6.43997	5.58651	5.73785	5.92498	6.31825	6.63138	0.936669	1.03346	0.978327	1.05154	0.914855	0.857125	0.969195	1.00439	0.890058	0.97689	0.94222	0.971136	0.842436	0.865257	0.893476	0.952781	-0.0943883	0.0474855	-0.0316109	0.0725055	-0.128385	-0.222423	-0.0451412	0.00631919	-0.168029	-0.0337317	-0.0858639	-0.0422552	-0.247362
sp|Q99988|GDF15_HUMAN	GDF15	GDF15_HUMAN Growth/differentiation factor 15	3	5.48283	5.97359	6.37106	6.65282	6.71298	6.64887	6.41595	6.32478	5.6656	5.23885	6.065	5.71942	6.04478	7.06295	6.72537	6.89518	6.12007	0.895876	0.976065	1.04101	1.08705	1.09688	1.0864	1.04834	1.03345	0.92574	0.856011	0.991001	0.934534	0.987697	1.15406	1.0989	1.12665	-0.158629	-0.0349511	0.0579841	0.120417	0.133404	0.11956	0.0681136	0.047466	-0.111321	-0.224299	-0.0130417	-0.0976805	-0.0178595
sp|P46063|RECQ1_HUMAN	RECQL	RECQ1_HUMAN ATP-dependent DNA helicase Q1	54	6.59375	6.0982	6.00072	6.09022	6.54903	6.32206	6.53578	6.12417	6.02083	6.11035	6.51901	6.47759	6.2038	6.08857	6.09538	6.17053	6.19572	1.06424	0.98426	0.968526	0.982972	1.05702	1.02039	1.05489	0.988451	0.971772	0.986221	1.05218	1.04549	1.0013	0.982705	0.983805	0.995934	0.0898267	-0.0228891	-0.0461369	-0.0247782	0.0800087	0.0291222	0.0770869	-0.0167582	-0.0413101	-0.0200175	0.0733804	0.0641846	0.00187965
sp|P54132|BLM_HUMAN	BLM	BLM_HUMAN Bloom syndrome protein	24	5.88345	6.33484	7.00681	6.15393	6.294	5.5413	5.61694	6.86085	6.76168	6.07516	5.44567	6.16491	6.17626	6.75026	6.36296	6.57099	6.34476	0.927293	0.998437	1.10435	0.969924	0.992	0.873367	0.885288	1.08134	1.06571	0.957509	0.858294	0.971654	0.973443	1.06391	1.00287	1.03566	-0.108903	-0.00225684	0.143193	-0.044057	-0.0115878	-0.195341	-0.175781	0.112822	0.0918167	-0.0626426	-0.220455	-0.0414852	-0.0388315
sp|Q07864|DPOE1_HUMAN	POLE	DPOE1_HUMAN DNA polymerase epsilon catalytic subunit A	50	6.18701	6.17064	6.44389	6.5845	6.0578	5.14791	6.24424	6.18836	6.53442	6.65351	6.38226	6.35844	6.30039	6.34714	6.30686	6.09262	6.34651	0.974868	0.972289	1.01534	1.0375	0.954509	0.81114	0.983886	0.975081	1.02961	1.04837	1.00563	1.00188	0.992733	1.0001	0.993752	0.959995	-0.0367211	-0.0405433	0.0219684	0.0531104	-0.0671695	-0.301977	-0.0234375	-0.0364063	0.0420957	0.0681522	0.00810392	0.00270939	-0.0105223
sp|P08574|CY1_HUMAN	CYC1	CY1_HUMAN Cytochrome c1, heme protein, mitochondrial	24	6.77218	6.21666	6.42967	6.92538	6.09366	6.34322	6.75986	6.26498	5.27672	5.79829	6.2642	6.27347	6.24633	6.20936	6.06129	6.06472	6.58597	1.02827	0.943924	0.976267	1.05153	0.925248	0.963141	1.0264	0.951261	0.801206	0.8804	0.951143	0.95255	0.948429	0.942816	0.920333	0.920854	0.0402238	-0.0832568	-0.0346518	0.0724967	-0.112087	-0.0541811	0.0375969	-0.0720866	-0.319755	-0.183769	-0.0722662	-0.0701328	-0.0763877
sp|Q9BV44|THUM3_HUMAN	THUMPD3	THUM3_HUMAN THUMP domain-containing protein 3	44	6.48871	5.98728	6.24259	6.2378	6.39112	6.3184	6.34245	5.86301	5.97888	6.20044	6.70059	6.32495	6.39088	6.19855	6.15147	6.18287	6.23909	1.04001	0.959639	1.00056	0.999792	1.02437	1.01271	1.01657	0.939721	0.958293	0.993804	1.07397	1.01376	1.02433	0.993501	0.985955	0.990988	0.0565949	-0.059436	0.000807939	-0.00029948	0.034732	0.0182225	0.0237035	-0.0896953	-0.0614615	-0.00896618	0.102951	0.0197173	0.0346778
sp|O15031|PLXB2_HUMAN	PLXNB2	PLXB2_HUMAN Plexin-B2	36	6.28794	6.24862	6.30353	6.7331	6.0957	6.10146	6.57279	6.11921	5.97005	6.21087	6.60047	6.55581	6.21848	6.11136	5.85233	6.01827	6.3933	0.983521	0.97737	0.985959	1.05315	0.953452	0.954353	1.02808	0.957129	0.933798	0.971466	1.0324	1.02542	0.972656	0.955901	0.915385	0.941341	-0.0239728	-0.0330226	-0.0204003	0.0747107	-0.0687683	-0.0674057	0.0399457	-0.0632148	-0.0988172	-0.0417649	0.0460085	0.0362138	-0.0399982
sp|Q9BTC0|DIDO1_HUMAN	DIDO1	DIDO1_HUMAN Death-inducer obliterator 1	32	6.03206	6.64212	7.14158	6.14843	6.86208	6.47931	5.73865	6.2695	6.65007	6.01697	5.26453	5.82101	5.78748	6.70387	6.22057	6.22176	6.49105	0.929289	1.02327	1.10022	0.947217	1.05716	0.998192	0.884087	0.965869	1.0245	0.926964	0.811045	0.896775	0.89161	1.03279	0.958331	0.958514	-0.105801	0.0331925	0.137792	-0.0782332	0.0801946	-0.00261113	-0.17774	-0.0501009	0.0349182	-0.109414	-0.302147	-0.157182	-0.165516
sp|Q92576|PHF3_HUMAN	PHF3	PHF3_HUMAN PHD finger protein 3	21	6.13053	6.19756	6.77836	5.56251	6.36022	6.90845	5.37069	10.5837	6.25	4.80047	5.00865	5.21287	5.79992	6.52575	5.98652	6.52378	6.16724	0.994048	1.00492	1.09909	0.901945	1.03129	1.12019	0.870842	1.71612	1.01342	0.778382	0.812138	0.845252	0.94044	1.05813	0.970697	1.05781	-0.00861319	0.00707534	0.136311	-0.148889	0.0444517	0.163737	-0.199518	0.779147	0.0192312	-0.361449	-0.300203	-0.242547	-0.088592
sp|Q8IY81|SPB1_HUMAN	FTSJ3	SPB1_HUMAN pre-rRNA processing protein FTSJ3	17	4.94574	7.54315	7.27763	3.84547	5.16608	4.76674	4.40588	11.7363	8.54948	4.5271	4.39035	4.82803	6.61609	6.13154	6.82141	8.44902	5.903	0.837835	1.27785	1.23287	0.651444	0.875162	0.807512	0.74638	1.98819	1.44833	0.766915	0.743749	0.817895	1.1208	1.03872	1.15558	1.43131	-0.255261	0.353719	0.302021	-0.618288	-0.192378	-0.308445	-0.422018	0.991458	0.534389	-0.382861	-0.427112	-0.290013	0.164531
sp|Q9Y4L1|HYOU1_HUMAN	HYOU1	HYOU1_HUMAN Hypoxia up-regulated protein 1	117	6.48616	6.40639	6.17722	6.36875	6.44145	6.43323	6.48342	6.03786	5.90518	6.23742	6.37609	6.16367	6.17555	6.05699	6.1924	6.0582	6.35963	1.0199	1.00735	0.971318	1.00143	1.01287	1.01157	1.01946	0.949404	0.928541	0.980783	1.00259	0.969187	0.971055	0.952412	0.973704	0.952603	0.0284218	0.0105688	-0.0419851	0.00206741	0.0184426	0.0166004	0.0278122	-0.0749055	-0.106962	-0.0279934	0.00372916	-0.0451532	-0.0423752
sp|P36915|GNL1_HUMAN	GNL1	GNL1_HUMAN Guanine nucleotide-binding protein-like 1	25	6.19211	6.28233	6.34282	6.62575	6.16415	6.36946	6.49215	5.91006	5.99129	6.02819	6.47057	6.49269	6.21589	5.92466	6.17448	6.32341	6.36075	0.973487	0.987671	0.997181	1.04166	0.969091	1.00137	1.02066	0.929145	0.941915	0.947716	1.01726	1.02074	0.977226	0.93144	0.970715	0.994129	-0.0387664	-0.0178977	-0.00407305	0.0588863	-0.0452955	0.00197361	0.0294989	-0.106025	-0.0863308	-0.0774726	0.0246954	0.0296189	-0.0332365
sp|Q9Y6E0|STK24_HUMAN	STK24	STK24_HUMAN Serine/threonine-protein kinase 24	25	6.5058	6.28445	6.15158	6.18152	6.26603	6.49401	6.15584	6.13275	6.26933	6.45424	6.41184	6.56018	6.0618	5.7658	6.13911	6.16571	6.28084	1.03582	1.00058	0.97942	0.984187	0.997642	1.03394	0.980099	0.976422	0.998168	1.02761	1.02086	1.04448	0.965126	0.917999	0.977435	0.98167	0.0507695	0.000829545	-0.0299999	-0.0229953	-0.00340527	0.0481527	-0.0290012	-0.0344228	-0.00264567	0.0392903	0.0297815	0.0627785	-0.0512107
sp|O00506|STK25_HUMAN	STK25	STK25_HUMAN Serine/threonine-protein kinase 25	12	6.69642	6.16798	6.23109	6.22789	6.22848	6.048	6.32095	5.97721	6.35563	6.31806	6.63959	6.72611	6.14961	5.9563	5.99563	5.96105	6.33085	1.05775	0.974274	0.984243	0.983738	0.983831	0.955323	0.998437	0.944141	1.00391	0.997981	1.04877	1.06243	0.971373	0.940838	0.947051	0.941588	0.0809919	-0.0376	-0.0229135	-0.0236546	-0.0235179	-0.0659399	-0.00225667	-0.0829258	0.00563706	-0.00291644	0.0686961	0.0873743	-0.0419032
sp|Q9P289|MST4_HUMAN	MST4	MST4_HUMAN Serine/threonine-protein kinase MST4	15	6.49017	5.96405	6.77536	6.13469	6.41368	5.98749	5.99786	5.49616	6.2091	6.18094	6.78853	6.63766	6.18574	5.98839	6.46485	6.28531	6.34107	1.02351	0.940544	1.06849	0.967454	1.01145	0.94424	0.945875	0.866756	0.979188	0.974748	1.07057	1.04677	0.975505	0.944382	1.01952	0.991207	0.0335305	-0.0884334	0.0955719	-0.0477353	0.0164266	-0.0827744	-0.0802779	-0.206302	-0.0303416	-0.0368995	0.0983735	0.065949	-0.0357795
sp|P56182|RRP1_HUMAN	RRP1	RRP1_HUMAN Ribosomal RNA processing protein 1 homolog A	11	5.35245	6.97234	7.56878	5.39932	5.89258	4.90194	5.09726	6.0185	8.49332	5.96891	5.24677	5.29242	6.28748	7.18908	6.78252	7.53632	6.32322	0.846475	1.10266	1.19698	0.853887	0.931895	0.775228	0.806117	0.951809	1.34319	0.943966	0.829762	0.836981	0.994347	1.13693	1.07264	1.19185	-0.240461	0.140983	0.259401	-0.227882	-0.101761	-0.367307	-0.310938	-0.071256	0.425669	-0.0831925	-0.26923	-0.256732	-0.00817808
sp|O75146|HIP1R_HUMAN	HIP1R	HIP1R_HUMAN Huntingtin-interacting protein 1-related protein	38	6.0168	6.33823	6.11916	6.39887	6.3258	5.81965	6.13694	6.57366	6.19939	6.48286	6.46546	6.42806	6.26518	6.16013	6.05614	6.21366	6.21826	0.967601	1.01929	0.984062	1.02904	1.01729	0.935896	0.986922	1.05715	0.996965	1.04255	1.03975	1.03374	1.00754	0.990651	0.973928	0.999259	-0.0475157	0.0275679	-0.0231785	0.0413051	0.0247358	-0.0955797	-0.0189926	0.0801847	-0.00438583	0.0601183	0.0562409	0.0478713	0.0108439
sp|O00291|HIP1_HUMAN	HIP1	HIP1_HUMAN Huntingtin-interacting protein 1	17	6.2847	6.3198	6.34859	6.31462	6.22333	6.01386	5.88594	6.41965	6.34957	6.34648	6.1178	6.25516	6.23373	6.3648	6.19099	6.33098	6.31693	0.994898	1.00045	1.00501	0.999635	0.985183	0.952023	0.931773	1.01626	1.00517	1.00468	0.968477	0.990222	0.986829	1.00758	0.980063	1.00222	-0.00737914	0.000655888	0.0072132	-0.000527096	-0.0215363	-0.0709317	-0.10195	0.0232716	0.00743588	0.00673363	-0.0462101	-0.0141762	-0.0191273
sp|O75489|NDUS3_HUMAN	NDUFS3	NDUS3_HUMAN NADH dehydrogenase [ubiquinone] iron-sulfur protein 3, mitochondrial	21	6.2845	6.05499	6.38764	6.74992	6.2668	6.03329	6.49336	5.77982	5.99975	6.39297	6.54454	6.43736	6.21743	5.94192	6.22945	6.18625	6.36926	0.986692	0.950658	1.00289	1.05976	0.983913	0.947251	1.01948	0.907455	0.941985	1.00372	1.02752	1.01069	0.976162	0.932905	0.978049	0.971266	-0.0193284	-0.0730018	0.00415667	0.0837441	-0.0233974	-0.0781814	0.0278389	-0.140102	-0.0862239	0.00535999	0.0391655	0.0153428	-0.034808
sp|Q8ND04-2|SMG8_HUMAN	SMG8	SMG8_HUMAN Isoform 2 of Protein SMG8	30	5.86816	6.32748	6.32627	6.26997	6.13217	5.77744	6.13302	6.14515	6.70185	6.45627	6.19846	6.40334	6.3249	6.40206	6.36897	6.16449	6.19797	0.946787	1.0209	1.0207	1.01162	0.989384	0.93215	0.989521	0.991478	1.0813	1.04167	1.00008	1.03314	1.02048	1.03293	1.02759	0.994598	-0.0788876	0.0298353	0.0295594	0.0166628	-0.0153981	-0.101365	-0.0151981	-0.0123475	0.112764	0.0589051	0.000114052	0.0470288	0.0292469
tr|B4DS50|B4DS50_HUMAN	ALG3	B4DS50_HUMAN Dol-P-Man:Man(5)GlcNAc(2)-PP-Dol alpha-1,3-mannosyltransferase	1	5.93268	7.2197	6.155	6.0804	6.75217	4.42307	7.33944	5.37209	6.17528	6.26047	5.72971	6.41908	6.797	5.90131	6.45286	6.98975	6.34695	0.93473	1.13751	0.969758	0.958004	1.06385	0.696882	1.15637	0.846406	0.972953	0.986375	0.902751	1.01137	1.07091	0.929787	1.01669	1.10128	-0.0973784	0.185877	-0.0443035	-0.0618961	0.0892889	-0.521014	0.209608	-0.240579	-0.0395578	-0.0197914	-0.1476	0.0163042	0.0988358
sp|Q92685|ALG3_HUMAN	ALG3	ALG3_HUMAN Dol-P-Man:Man(5)GlcNAc(2)-PP-Dol alpha-1,3-mannosyltransferase	4	6.1721	6.44986	6.5256	5.07976	6.27203	6.29308	6.08197	6.06665	6.63347	5.86404	6.49886	5.76342	6.82528	6.50332	6.78787	6.18268	6.05683	1.01903	1.06489	1.0774	0.838683	1.03553	1.03901	1.00415	1.00162	1.0952	0.96817	1.07298	0.951557	1.12687	1.07372	1.1207	1.02078	0.0271985	0.0907049	0.107548	-0.253803	0.0503695	0.0552034	0.00597578	0.00233716	0.131201	-0.046668	0.101624	-0.0716378	0.172325
sp|Q9UPW6|SATB2_HUMAN	SATB2	SATB2_HUMAN DNA-binding protein SATB2	17	5.52017	6.47273	7.28725	5.50727	5.67307	5.42654	5.52754	5.91428	7.62865	6.03888	5.5241	6.03123	6.39679	6.96653	7.05754	7.02743	6.19685	0.890802	1.04452	1.17596	0.88872	0.915476	0.875693	0.891991	0.9544	1.23105	0.974507	0.891436	0.973273	1.03226	1.1242	1.13889	1.13403	-0.166824	0.0628381	0.233838	-0.170199	-0.127407	-0.191504	-0.164899	-0.0673337	0.299892	-0.0372552	-0.165797	-0.039084	0.0458119
sp|Q9UBP6|TRMB_HUMAN	METTL1	TRMB_HUMAN tRNA (guanine-N(7)-)-methyltransferase	14	6.52254	6.17073	5.66258	5.93582	6.2118	6.70584	6.38708	6.25164	5.95368	6.37752	6.6455	6.8564	6.07907	5.86235	6.2381	6.13934	6.07292	1.07404	1.01611	0.932432	0.977425	1.02287	1.10422	1.05173	1.02943	0.980366	1.05016	1.09428	1.12901	1.00101	0.965327	1.0272	1.01094	0.103044	0.0230514	-0.10093	-0.0329424	0.0326216	0.143028	0.0727668	0.0418449	-0.0286081	0.0706057	0.129988	0.175062	0.00146086
sp|Q86Y37|CACL1_HUMAN	CACUL1	CACL1_HUMAN CDK2-associated and cullin domain-containing protein 1	6	5.46904	6.41435	6.42536	7.23403	5.81773	5.50217	6.40199	6.20264	6.41588	5.97747	6.05469	6.80106	6.10363	6.28838	6.31179	6.57978	6.3857	0.856452	1.00449	1.00621	1.13285	0.911057	0.86164	1.00255	0.971334	1.00473	0.936072	0.948165	1.06505	0.955829	0.98476	0.988426	1.03039	-0.223556	0.00645943	0.00893364	0.179956	-0.134387	-0.214843	0.00367678	-0.0419613	0.00680351	-0.0953087	-0.0767906	0.090916	-0.0651761
sp|Q8NF37|PCAT1_HUMAN	LPCAT1	PCAT1_HUMAN Lysophosphatidylcholine acyltransferase 1	11	6.54472	6.13651	6.26293	6.26378	6.49905	6.11987	6.17894	5.81178	5.8526	6.24056	6.55998	6.80369	6.34674	6.29714	6.04777	6.03395	6.30199	1.03852	0.973742	0.993803	0.993938	1.03127	0.971102	0.980475	0.922214	0.928692	0.990253	1.04094	1.07961	1.0071	0.999231	0.959661	0.957468	0.0545252	-0.0383879	-0.00896857	-0.00877278	0.0444225	-0.0423053	-0.028447	-0.116826	-0.106729	-0.0141308	0.0578851	0.110511	0.0102094
sp|Q9UKV3|ACINU_HUMAN	ACIN1	ACINU_HUMAN Apoptotic chromatin condensation inducer in the nucleus	43	6.18328	6.87125	6.65382	5.55343	6.12636	6.35616	5.78646	7.1586	6.86446	5.43338	5.51421	5.5918	6.14155	6.23686	6.39656	7.13181	6.31544	0.979073	1.08801	1.05358	0.879341	0.97006	1.00645	0.916239	1.13351	1.08693	0.860332	0.873131	0.885417	0.972465	0.987557	1.01284	1.12926	-0.0305121	0.121688	0.0752984	-0.185505	-0.0438542	0.00927105	-0.126203	0.180793	0.120262	-0.217034	-0.19573	-0.175572	-0.0402816
sp|Q9UKV3-5|ACINU_HUMAN	ACIN1	ACINU_HUMAN Isoform 4 of Apoptotic chromatin condensation inducer in the nucleus	1	6.18119	7.45987	7.74495	5.71732	6.96598	6.17339	5.57975	6.25492	7.01652	5.20752	4.86752	5.2767	5.6042	6.24484	6.28379	7.42153	6.77583	0.912241	1.10095	1.14303	0.843781	1.02806	0.91109	0.823478	0.923122	1.03552	0.768543	0.718365	0.778753	0.827087	0.921634	0.927383	1.09529	-0.132514	0.138752	0.192858	-0.245059	0.0399281	-0.134335	-0.280198	-0.115407	0.0503575	-0.379802	-0.477211	-0.360762	-0.27389
sp|P11309|PIM1_HUMAN	PIM1	PIM1_HUMAN Serine/threonine-protein kinase pim-1	7	6.37321	6.245	6.62964	6.23171	5.96379	5.24048	6.32341	5.51609	7.41029	7.35016	6.84663	6.66681	6.02113	5.71848	5.89828	5.5649	6.36989	1.00052	0.980394	1.04078	0.978307	0.936247	0.822696	0.992703	0.865963	1.16333	1.15389	1.07484	1.04661	0.945249	0.897736	0.925963	0.873626	0.00075174	-0.0285669	0.0576621	-0.0316404	-0.095039	-0.281569	-0.0105657	-0.207622	0.218262	0.206507	0.104126	0.0657282	-0.0812342
sp|Q9UHJ6|SHPK_HUMAN	SHPK	SHPK_HUMAN Sedoheptulokinase	8	5.81582	6.36168	5.93576	6.33121	6.01866	6.13588	6.57669	6.1982	6.12855	6.25748	6.91055	6.62554	6.03736	6.30265	6.1403	6.22366	6.11112	0.951679	1.041	0.971305	1.03602	0.984871	1.00405	1.07618	1.01425	1.00285	1.02395	1.13082	1.08418	0.987931	1.03134	1.00478	1.01842	-0.0714536	0.0579716	-0.0420035	0.051045	-0.0219939	0.00583405	0.105925	0.0204131	0.00410956	0.0341456	0.177364	0.116602	-0.0175184
sp|Q96GQ7|DDX27_HUMAN	DDX27	DDX27_HUMAN Probable ATP-dependent RNA helicase DDX27	21	4.93812	7.44908	7.44141	4.3982	5.56072	5.15568	4.67311	5.29275	9.55624	6.08426	5.21326	5.80703	6.71834	5.89411	7.21662	8.60106	6.0567	0.815315	1.22989	1.22862	0.726171	0.91811	0.851235	0.77156	0.873867	1.5778	1.00455	0.860742	0.958777	1.10924	0.973155	1.19151	1.42009	-0.294571	0.29853	0.297043	-0.461619	-0.123261	-0.23237	-0.37415	-0.194515	0.657911	0.00654926	-0.216347	-0.0607321	0.149572
sp|Q9H9F9|ARP5_HUMAN	ACTR5	ARP5_HUMAN Actin-related protein 5	10	5.81821	6.38572	6.69548	6.93354	5.90645	5.97335	6.2533	5.91698	6.09438	6.37548	5.95224	6.3158	5.97535	6.53603	6.60981	6.25788	6.45824	0.900897	0.988771	1.03673	1.0736	0.914561	0.92492	0.968267	0.916191	0.94366	0.987186	0.921651	0.977945	0.925229	1.01205	1.02347	0.968976	-0.150565	-0.0162912	0.052047	0.102452	-0.128849	-0.1126	-0.0465228	-0.126279	-0.083661	-0.0186065	-0.117708	-0.032175	-0.112117
sp|Q96JP5|ZFP91_HUMAN	ZFP91	ZFP91_HUMAN E3 ubiquitin-protein ligase ZFP91	14	5.68352	6.35078	6.70141	6.43166	6.52719	6.73676	5.85066	4.98768	6.2558	6.42821	6.23376	6.37086	6.04749	6.40182	6.56825	6.42414	6.29184	0.903316	1.00937	1.0651	1.02222	1.03741	1.07071	0.92988	0.792722	0.994272	1.02167	0.990769	1.01256	0.961164	1.01748	1.04393	1.02103	-0.146698	0.0134512	0.0909821	0.0317086	0.0529795	0.0985723	-0.104883	-0.335114	-0.00828817	0.0309345	-0.0133799	0.0180056	-0.0571461
sp|Q92947|GCDH_HUMAN	GCDH	GCDH_HUMAN Glutaryl-CoA dehydrogenase, mitochondrial	27	6.07396	6.09826	6.28359	6.74874	6.26221	6.5602	6.45407	4.7092	5.70588	6.55001	6.69998	6.70702	6.3504	6.097	6.37744	6.32204	6.30114	0.963947	0.967803	0.997215	1.07104	0.993822	1.04111	1.02427	0.747357	0.905532	1.0395	1.0633	1.06441	1.00782	0.967603	1.01211	1.00332	-0.0529749	-0.0472146	-0.00402324	0.0990059	-0.0089404	0.0581275	0.0345969	-0.42013	-0.143163	0.0558848	0.0885445	0.0900596	0.0112352
sp|Q96BH1|RNF25_HUMAN	RNF25	RNF25_HUMAN E3 ubiquitin-protein ligase RNF25	12	6.32935	5.95456	6.38786	6.77716	6.19784	6.29276	6.28789	6.19476	6.04955	6.2752	6.44465	6.41134	5.86215	6.27368	6.08625	6.175	6.36223	0.994832	0.935923	1.00403	1.06522	0.974161	0.98908	0.988315	0.973677	0.950853	0.98632	1.01295	1.00772	0.921398	0.986082	0.956622	0.970571	-0.00747575	-0.0955382	0.0057996	0.0911477	-0.0377676	-0.0158402	-0.0169571	-0.0384847	-0.0727053	-0.0198717	0.0185689	0.0110928	-0.118103
sp|Q15181|IPYR_HUMAN	PPA1	IPYR_HUMAN Inorganic pyrophosphatase	104	6.53244	6.02725	6.291	6.89777	6.60245	6.01688	6.91508	6.44145	5.56549	5.90448	6.38895	6.25925	6.3919	5.99223	5.9356	5.8378	6.43712	1.01481	0.936328	0.977301	1.07156	1.02568	0.934717	1.07425	1.00067	0.864594	0.917256	0.992518	0.972369	0.992976	0.930888	0.92209	0.906897	0.0212077	-0.0949143	-0.0331249	0.0997158	0.0365872	-0.0973987	0.103332	0.000971239	-0.209906	-0.124604	-0.0108354	-0.0404244	-0.0101694
sp|Q9H2U2|IPYR2_HUMAN	PPA2	IPYR2_HUMAN Inorganic pyrophosphatase 2, mitochondrial	25	6.63665	6.0516	6.12406	6.1367	6.64442	6.48268	6.61774	5.77831	5.64768	6.21099	6.51614	6.24732	6.34066	6.11249	6.23755	6.21501	6.23725	1.06403	0.970235	0.981852	0.983879	1.06528	1.03935	1.061	0.926419	0.905476	0.995789	1.04471	1.00161	1.01658	0.979997	1.00005	0.996434	0.0895445	-0.043594	-0.0264222	-0.0234476	0.0912326	0.0556797	0.0854279	-0.110263	-0.143252	-0.00608742	0.0631069	0.00232677	0.0237224
sp|Q15233|NONO_HUMAN	NONO	NONO_HUMAN Non-POU domain-containing octamer-binding protein	44	5.71539	6.5026	6.79594	5.24261	5.08454	4.67511	4.42905	12.7102	7.90304	4.98797	4.04078	4.87273	6.15991	6.31153	6.46347	8.10509	6.06414	0.942491	1.0723	1.12068	0.864527	0.838461	0.770944	0.730368	2.09596	1.30324	0.822536	0.666341	0.803533	1.01579	1.0408	1.06585	1.33656	-0.0854499	0.100715	0.164371	-0.210017	-0.254185	-0.375302	-0.453305	1.06761	0.382106	-0.281849	-0.585668	-0.315572	0.0226074
sp|P23246|SFPQ_HUMAN	SFPQ	SFPQ_HUMAN Splicing factor, proline- and glutamine-rich	57	5.10683	7.14218	7.8826	4.91363	5.30054	5.39802	4.47503	7.05321	8.86719	5.11807	4.22235	5.33388	6.8739	7.10925	7.38572	7.8176	6.26131	0.815617	1.14068	1.25894	0.784761	0.846554	0.862123	0.714711	1.12648	1.41619	0.817412	0.674356	0.851879	1.09784	1.13543	1.17958	1.24856	-0.294036	0.1899	0.332207	-0.349675	-0.240325	-0.214034	-0.484567	0.171815	0.502012	-0.290865	-0.568418	-0.231279	0.134664
sp|Q8WXF1|PSPC1_HUMAN	PSPC1	PSPC1_HUMAN Paraspeckle component 1	17	5.73186	6.46118	6.60908	5.65875	5.90247	5.90405	5.44081	5.99637	7.66637	6.20923	5.66852	6.22784	6.56541	6.60059	6.59903	6.75846	6.11522	0.937311	1.05657	1.08076	0.925355	0.96521	0.965469	0.889717	0.980565	1.25365	1.01537	0.926953	1.01842	1.07362	1.07937	1.07912	1.10519	-0.0934004	0.0793939	0.112046	-0.11192	-0.051085	-0.0506989	-0.168582	-0.0283144	0.32614	0.0220106	-0.109432	0.0263281	0.102481
sp|P35658-5|NU214_HUMAN	NUP214	NU214_HUMAN Isoform 5 of Nuclear pore complex protein Nup214	90	6.08196	6.46503	6.5068	5.92268	6.26259	5.29516	6.0543	5.94052	7.29364	6.31397	6.09736	5.90793	6.75069	6.32631	6.55462	6.22645	6.24412	0.97403	1.03538	1.04207	0.948522	1.00296	0.848024	0.969601	0.951379	1.16808	1.01119	0.976497	0.946159	1.08113	1.01316	1.04973	0.997171	-0.0379614	0.0501594	0.0594505	-0.0762475	0.00426175	-0.237823	-0.0445375	-0.0719085	0.224141	0.0160497	-0.034313	-0.079845	0.112537
sp|P35658-3|NU214_HUMAN	NUP214	NU214_HUMAN Isoform 3 of Nuclear pore complex protein Nup214	6	6.36386	6.71465	6.19575	5.24198	6.29382	6.44595	5.60443	5.89541	8.06754	6.59378	5.89884	6.02176	6.33649	6.02238	6.26698	6.0364	6.12906	1.03831	1.09554	1.01088	0.855267	1.02688	1.0517	0.914403	0.961878	1.31628	1.07582	0.962438	0.982493	1.03384	0.982594	1.0225	0.984882	0.0542363	0.131646	0.0156131	-0.225554	0.0382701	0.0727272	-0.129098	-0.0560737	0.396463	0.10544	-0.0552345	-0.0254806	0.0480181
sp|P39656|OST48_HUMAN	DDOST	OST48_HUMAN Dolichyl-diphosphooligosaccharide--protein glycosyltransferase 48 kDa subunit	39	6.56248	6.05926	5.89682	6.24042	6.49125	6.67203	6.46525	6.24056	5.9915	6.24503	6.45014	6.41727	6.05858	6.0568	6.07904	6.07357	6.18975	1.06022	0.978919	0.952676	1.00819	1.04871	1.07792	1.04451	1.00821	0.967972	1.00893	1.04207	1.03676	0.978809	0.978522	0.982115	0.981231	0.0843611	-0.0307384	-0.0699428	0.0117632	0.0686163	0.108246	0.0628262	0.0117955	-0.0469627	0.0128285	0.0594505	0.0520797	-0.0309003
sp|Q9NPB0|SMDC1_HUMAN	SAYSD1	SMDC1_HUMAN SAYSvFN domain-containing protein 1	2	5.08764	5.12607	6.32725	6.74814	4.98703	6.01225	6.44361	7.45989	5.55627	6.53669	7.01571	7.70519	5.00967	5.92914	6.92014	7.13531	5.82228	0.873823	0.880424	1.08673	1.15902	0.856543	1.03263	1.10672	1.28127	0.954313	1.1227	1.20498	1.3234	0.860432	1.01835	1.18856	1.22552	-0.194586	-0.18373	0.119996	0.212907	-0.223402	0.046322	0.146286	0.357571	-0.0674663	0.166977	0.269006	0.404248	-0.216867
sp|P06737|PYGL_HUMAN	PYGL	PYGL_HUMAN Glycogen phosphorylase, liver form	34	6.382	5.87432	6.03152	6.47762	5.90744	6.35453	6.09723	6.11813	5.73368	6.27511	6.75057	6.9222	6.25969	6.18988	6.36901	6.25707	6.19136	1.03079	0.948792	0.974183	1.04623	0.954142	1.02635	0.984796	0.988171	0.926077	1.01353	1.09032	1.11804	1.01104	0.99976	1.02869	1.01061	0.0437511	-0.0758357	-0.0377359	0.0652063	-0.0677244	0.0375279	-0.0221035	-0.0171668	-0.110796	0.0193832	0.124752	0.160973	0.0158337
sp|P11216|PYGB_HUMAN	PYGB	PYGB_HUMAN Glycogen phosphorylase, brain form	27	6.77786	6.23301	6.40794	6.39534	6.11233	5.73976	5.12502	5.77311	6.30158	6.6649	6.93095	6.77176	6.19825	5.92163	6.28912	6.35744	6.45354	1.05025	0.965828	0.992934	0.990982	0.947129	0.889397	0.794141	0.894565	0.976454	1.03275	1.07398	1.04931	0.960442	0.917579	0.974523	0.985109	0.0707396	-0.0501612	-0.0102295	-0.0130691	-0.0783678	-0.1691	-0.332533	-0.160741	-0.0343766	0.046493	0.102963	0.0694407	-0.0582292
sp|Q07820|MCL1_HUMAN	MCL1	MCL1_HUMAN Induced myeloid leukemia cell differentiation protein Mcl-1	8	6.75519	6.63228	6.18786	6.2165	6.19411	6.36369	6.27729	6.10174	5.8547	6.27963	6.49709	6.12167	6.26012	6.1099	6.166	5.98225	6.44796	1.04765	1.02859	0.959662	0.964104	0.960631	0.986931	0.973532	0.946306	0.907993	0.973894	1.00762	0.949397	0.970869	0.947571	0.956272	0.927774	0.0671541	0.0406627	-0.0594017	-0.0527397	-0.0579452	-0.0189787	-0.0387004	-0.0796215	-0.139247	-0.0381627	0.0109515	-0.074917	-0.0426519
sp|Q92610|ZN592_HUMAN	ZNF592	ZN592_HUMAN Zinc finger protein 592	5	5.92174	6.54932	7.23538	7.38135	5.20557	7.89599	5.73438	7.37364	5.13806	6.27564	5.77334	6.63623	5.87443	6.33973	5.14024	5.52497	6.77195	0.874452	0.967125	1.06843	1.08999	0.768696	1.16599	0.846784	1.08885	0.758727	0.926711	0.852538	0.979959	0.867465	0.936175	0.759049	0.815861	-0.19355	-0.0482257	0.095498	0.124314	-0.379515	0.221549	-0.239933	0.122806	-0.398347	-0.109808	-0.230165	-0.0292069	-0.205122
sp|Q5T6F2|UBAP2_HUMAN	UBAP2	UBAP2_HUMAN Ubiquitin-associated protein 2	34	6.6048	5.87488	6.19994	6.16321	6.40713	6.64745	6.65795	6.2393	5.7922	6.21417	6.3288	6.30316	6.34859	5.87937	6.31162	6.02744	6.21071	1.06345	0.945928	0.998266	0.992352	1.03163	1.07032	1.07201	1.0046	0.932615	1.00056	1.01901	1.01489	1.0222	0.946651	1.01625	0.970492	0.0887573	-0.0801982	-0.00250337	-0.0110757	0.0449206	0.0980434	0.10032	0.00662656	-0.100646	0.000804085	0.0271744	0.0213177	0.0316786
tr|Q5JV08|Q5JV08_HUMAN	UBAP2	Q5JV08_HUMAN Ubiquitin-associated protein 2 (Fragment)	1	6.41542	5.55124	6.38266	6.2643	6.40748	6.87229	7.21467	7.70428	4.76125	5.26351	7.3819	7.30165	6.15722	5.50802	4.97958	5.83451	6.1534	1.04258	0.902141	1.03726	1.01802	1.04129	1.11683	1.17247	1.25204	0.773759	0.855382	1.19964	1.1866	1.00062	0.895117	0.80924	0.948176	0.0601588	-0.148575	0.0527728	0.0257684	0.0583721	0.159406	0.229548	0.324275	-0.370045	-0.22536	0.262607	0.246838	0.000894168
sp|P54619-3|AAKG1_HUMAN	PRKAG1	AAKG1_HUMAN Isoform 3 of 5'-AMP-activated protein kinase subunit gamma-1	26	6.62143	6.07487	5.68626	5.81549	6.37859	6.47832	6.3752	6.18508	6.37538	6.28125	6.75015	6.44455	6.26198	6.19106	6.12452	5.95589	6.04951	1.09454	1.00419	0.939953	0.961315	1.0544	1.07088	1.05384	1.02241	1.05387	1.03831	1.11582	1.0653	1.03512	1.0234	1.0124	0.984524	0.130324	0.00603465	-0.0893388	-0.0569181	0.0764187	0.0988008	0.0756517	0.0319734	0.0756924	0.0542328	0.158101	0.0912607	0.0498
sp|O95793|STAU1_HUMAN	STAU1	STAU1_HUMAN Double-stranded RNA-binding protein Staufen homolog 1	35	5.87679	6.63899	7.21541	5.66862	6.7826	6.24991	5.01231	6.32819	7.50004	6.06069	4.71694	5.38493	6.36107	7.09046	6.54889	6.56416	6.34995	0.925486	1.04552	1.13629	0.892703	1.06813	0.984245	0.789346	0.996573	1.18112	0.954447	0.742831	0.848027	1.00175	1.11662	1.03133	1.03373	-0.111717	0.064218	0.184336	-0.163748	0.0950926	-0.0229104	-0.34127	-0.00495288	0.240152	-0.0672637	-0.428895	-0.237818	0.00252366
sp|O95793-3|STAU1_HUMAN	STAU1	STAU1_HUMAN Isoform 3 of Double-stranded RNA-binding protein Staufen homolog 1	1	5.54955	5.92122	6.57576	5.52134	5.66653	7.18834	5.28697	6.54261	9.54203	6.13799	5.73082	5.98987	6.24073	6.30923	5.92603	5.87097	5.89197	0.941884	1.00496	1.11606	0.937096	0.961738	1.22002	0.897318	1.11043	1.6195	1.04176	0.97265	1.01662	1.05919	1.07082	1.00578	0.996436	-0.0863787	0.00714498	0.158408	-0.093731	-0.0562839	0.286909	-0.156308	0.151117	0.695547	0.0590168	-0.0400079	0.0237752	0.0829653
sp|Q9NUL3|STAU2_HUMAN	STAU2	STAU2_HUMAN Double-stranded RNA-binding protein Staufen homolog 2	21	5.40127	6.72817	7.53706	5.3745	6.0699	5.82122	4.96528	6.18623	8.28096	6.04041	4.72609	5.37444	6.65493	7.48324	6.8081	6.54819	6.26025	0.862788	1.07474	1.20396	0.858512	0.969594	0.92987	0.793144	0.988176	1.32278	0.964883	0.754936	0.858502	1.06305	1.19536	1.08751	1.04599	-0.212922	0.103994	0.267782	-0.22009	-0.0445475	-0.104899	-0.334345	-0.0171598	0.403578	-0.0515738	-0.405573	-0.220106	0.0882032
sp|Q7L2J0|MEPCE_HUMAN	MEPCE	MEPCE_HUMAN 7SK snRNA methylphosphate capping enzyme	27	5.88711	6.25945	6.38821	6.29804	6.27973	5.78189	6.08719	6.37597	6.59479	6.46551	6.28054	6.24515	6.13231	6.49472	6.19818	6.23119	6.2082	0.948279	1.00825	1.029	1.01447	1.01152	0.931331	0.980508	1.02702	1.06227	1.04145	1.01165	1.00595	0.987775	1.04615	0.998386	1.0037	-0.076616	0.0118603	0.0412361	0.0207273	0.0165269	-0.102634	-0.0283992	0.0384692	0.0871511	0.0585886	0.016713	0.00856061	-0.017745
sp|P56181-2|NDUV3_HUMAN	NDUFV3	NDUV3_HUMAN Isoform 2 of NADH dehydrogenase [ubiquinone] flavoprotein 3, mitochondrial	23	6.4951	6.06121	5.94492	6.23825	6.36471	6.97173	6.37247	6.33511	6.02681	6.45919	6.41811	6.3706	6.09352	5.94172	6.00131	5.90523	6.18487	1.05016	0.980006	0.961204	1.00863	1.02908	1.12722	1.03033	1.02429	0.974444	1.04435	1.03771	1.03003	0.98523	0.960686	0.970321	0.954786	0.0706085	-0.0291374	-0.0570859	0.0123981	0.0413515	0.172773	0.0431094	0.0346264	-0.0373487	0.06261	0.0534052	0.042686	-0.0214674
sp|P56181|NDUV3_HUMAN	NDUFV3	NDUV3_HUMAN NADH dehydrogenase [ubiquinone] flavoprotein 3, mitochondrial	3	6.12592	5.61089	6.35005	6.84013	4.99278	6.12574	7.13695	6.91479	5.92064	6.50084	5.9178	6.64729	6.15749	6.23567	6.08868	6.43434	6.23175	0.983018	0.900372	1.01898	1.09763	0.801185	0.982989	1.14526	1.10961	0.950077	1.04318	0.949621	1.06668	0.988084	1.00063	0.977042	1.03251	-0.0247103	-0.151407	0.0271312	0.134387	-0.319793	-0.0247526	0.195671	0.150049	-0.0738836	0.0609894	-0.0745758	0.0931295	-0.0172944
sp|Q9HAF1-3|EAF6_HUMAN	MEAF6	EAF6_HUMAN Isoform 3 of Chromatin modification-related protein MEAF6	5	6.61971	6.41247	6.97697	5.98081	6.13014	6.84156	5.89272	6.346	6.12602	5.59672	5.61347	6.24452	5.75992	6.67444	6.40184	6.38267	6.49749	1.01881	0.986915	1.07379	0.92048	0.943463	1.05295	0.906923	0.976685	0.942829	0.861366	0.863944	0.961067	0.886484	1.02723	0.985279	0.982329	0.0268855	-0.0190023	0.102718	-0.119542	-0.0839625	0.0744428	-0.140949	-0.034035	-0.0849324	-0.215301	-0.21099	-0.0572918	-0.173834
sp|P38435|VKGC_HUMAN	GGCX	VKGC_HUMAN Vitamin K-dependent gamma-carboxylase	7	6.46438	6.12194	6.23036	6.80066	6.16616	5.9848	6.74438	6.13813	5.98211	6.43761	6.16132	6.41702	6.00011	6.18711	6.17652	5.98737	6.40434	1.00938	0.955906	0.972835	1.06188	0.96281	0.934492	1.0531	0.958434	0.934072	1.0052	0.962055	1.00198	0.936883	0.966082	0.964428	0.934893	0.0134632	-0.0650599	-0.0397332	0.086626	-0.0546764	-0.0977457	0.074637	-0.0612496	-0.0983943	0.0074764	-0.0558093	0.0028547	-0.0940598
sp|O75694|NU155_HUMAN	NUP155	NU155_HUMAN Nuclear pore complex protein Nup155	52	6.30566	6.36544	6.25914	6.18605	6.32468	5.77405	6.31306	6.04485	6.57741	6.19677	6.18357	6.34562	6.45033	6.17069	6.29242	6.21026	6.27907	1.00423	1.01375	0.996826	0.985185	1.00726	0.919571	1.00541	0.962698	1.04751	0.986893	0.98479	1.0106	1.02727	0.982739	1.00213	0.989041	0.00609591	0.0197088	-0.00458702	-0.021533	0.010441	-0.120968	0.00778799	-0.0548449	0.0669681	-0.019035	-0.0221115	0.0152097	0.0388215
sp|Q9Y6H1|CHCH2_HUMAN	CHCHD2	CHCH2_HUMAN Coiled-coil-helix-coiled-coil-helix domain-containing protein 2, mitochondrial	9	5.50225	5.57789	6.23275	6.45831	5.66172	7.38916	7.35451	6.05514	5.65909	6.12144	6.0574	6.36872	6.54835	6.46012	6.48381	6.06932	5.9428	0.925868	0.938596	1.04879	1.08675	0.952702	1.24338	1.23755	1.0189	0.95226	1.03006	1.01928	1.07167	1.1019	1.08705	1.09104	1.02129	-0.111121	-0.0914233	0.068726	0.120014	-0.0699024	0.314268	0.307486	0.0270175	-0.0705727	0.0427282	0.0275559	0.0998606	0.139989
sp|Q66PJ3|AR6P4_HUMAN	ARL6IP4	AR6P4_HUMAN ADP-ribosylation factor-like protein 6-interacting protein 4	9	6.7405	6.05421	6.35306	6.24652	5.95983	6.53409	6.62207	6.64419	5.58869	6.17038	6.56665	6.39918	6.15161	5.82804	6.05711	6.08388	6.34857	1.06173	0.953633	1.00071	0.983925	0.938767	1.02922	1.04308	1.04656	0.880307	0.971932	1.03435	1.00797	0.968975	0.918008	0.95409	0.958307	0.0864234	-0.0684935	0.00101941	-0.0233796	-0.0911611	0.0415541	0.06085	0.0656611	-0.183922	-0.0410729	0.0487253	0.0114548	-0.0454682
sp|Q66PJ3-2|AR6P4_HUMAN	ARL6IP4	AR6P4_HUMAN Isoform 2 of ADP-ribosylation factor-like protein 6-interacting protein 4	1	6.55167	6.79706	6.48677	6.81435	5.92103	6.05308	6.14483	6.67117	5.77336	6.39565	5.86375	6.51614	6.46405	5.51461	5.84676	6.18572	6.66246	0.983371	1.0202	0.973629	1.0228	0.888715	0.908535	0.922306	1.00131	0.86655	0.959953	0.880118	0.978038	0.970219	0.827713	0.877567	0.928443	-0.0241928	0.0288554	-0.0385552	0.0325205	-0.170207	-0.138386	-0.116682	0.0018843	-0.206644	-0.0589645	-0.184232	-0.0320379	-0.0436172
sp|Q66PJ3-4|AR6P4_HUMAN	ARL6IP4	AR6P4_HUMAN Isoform 4 of ADP-ribosylation factor-like protein 6-interacting protein 4	1	6.28932	5.68051	6.4171	6.45262	6.3137	6.13494	6.79355	9.28713	6.5102	5.43271	5.65106	7.51478	5.23398	5.84063	4.45477	5.993	6.20989	1.01279	0.914752	1.03337	1.03909	1.01672	0.987931	1.09399	1.49554	1.04836	0.874848	0.91001	1.21013	0.842846	0.940537	0.717367	0.965074	0.0183369	-0.128547	0.0473543	0.0553179	0.0239186	-0.0175179	0.129599	0.580666	0.0681347	-0.192895	-0.136046	0.275164	-0.246659
sp|Q9BZJ4|S2539_HUMAN	SLC25A39	S2539_HUMAN Solute carrier family 25 member 39	6	5.91981	7.90683	6.43976	6.30243	5.88956	6.19245	6.36204	6.24327	5.72297	6.11602	6.31748	7.01091	5.39381	5.96137	5.8114	6.40987	6.64221	0.891241	1.19039	0.969521	0.948846	0.886687	0.932288	0.95782	0.939939	0.861607	0.920781	0.951112	1.05551	0.812051	0.897498	0.87492	0.965021	-0.166112	0.251437	-0.0446559	-0.0757546	-0.173503	-0.101152	-0.0621734	-0.0893609	-0.214899	-0.11907	-0.0723136	0.0779389	-0.300358
sp|O95817|BAG3_HUMAN	BAG3	BAG3_HUMAN BAG family molecular chaperone regulator 3	34	6.46223	5.8749	5.82488	6.18554	6.22706	6.67627	6.55134	6.38667	5.98813	6.37617	6.5931	6.40446	6.28157	6.08498	6.00637	6.07633	6.08689	1.06166	0.965173	0.956955	1.01621	1.02303	1.09683	1.0763	1.04925	0.983775	1.04753	1.08316	1.05217	1.03198	0.999687	0.986772	0.998266	0.0863274	-0.0511404	-0.0634764	0.0231948	0.0328465	0.133338	0.106085	0.0693592	-0.0235992	0.0669854	0.115252	0.0733722	0.0454205
sp|P06576|ATPB_HUMAN	ATP5B	ATPB_HUMAN ATP synthase subunit beta, mitochondrial	150	6.37643	6.0298	6.16938	6.70911	6.13305	6.64497	6.80261	6.16843	5.46375	6.23566	6.626	6.44565	6.31189	6.0046	5.93778	5.9409	6.32118	1.00874	0.953904	0.975985	1.06137	0.970238	1.05122	1.07616	0.975835	0.864356	0.986471	1.04822	1.01969	0.99853	0.949918	0.939347	0.93984	0.012555	-0.0680837	-0.0350684	0.0859275	-0.0435892	0.0720688	0.105894	-0.0352906	-0.210302	-0.0196516	0.0679443	0.028132	-0.00212183
tr|F8W0P7|F8W0P7_HUMAN	ATP5B	F8W0P7_HUMAN ATP synthase subunit beta, mitochondrial (Fragment)	1	6.49217	5.73102	5.05738	5.83046	7.26971	6.00555	5.29806	7.77666	5.60825	6.07489	7.77638	6.67304	5.04467	6.87078	5.18564	7.30534	5.77776	1.12365	0.991911	0.875319	1.00912	1.25822	1.03943	0.916975	1.34597	0.970662	1.05143	1.34592	1.15495	0.873119	1.18918	0.897518	1.26439	0.168191	-0.0117177	-0.192119	0.0131001	0.331388	0.0557867	-0.125045	0.428641	-0.042959	0.0723486	0.428589	0.207834	-0.19575
sp|P84157|MXRA7_HUMAN	MXRA7	MXRA7_HUMAN Matrix-remodeling-associated protein 7	3	5.83143	5.69706	6.30274	7.436	4.05472	6.34457	6.66943	6.07626	5.34034	7.38943	6.73718	7.02378	6.17873	6.33244	6.02974	6.55615	6.31681	0.923161	0.901889	0.997773	1.17718	0.641894	1.0044	1.05582	0.961919	0.845418	1.1698	1.06655	1.11192	0.978141	1.00247	0.954555	1.03789	-0.115346	-0.148978	-0.00321646	0.235331	-0.639593	0.00632678	0.0783679	-0.056012	-0.242264	0.226267	0.0929492	0.153052	-0.0318853
sp|P15170-3|ERF3A_HUMAN	GSPT1	ERF3A_HUMAN Isoform 3 of Eukaryotic peptide chain release factor GTP-binding subunit ERF3A	90	6.61459	6.15758	6.02397	6.21653	6.65475	6.33727	6.49735	6.3155	5.89558	6.14677	6.33766	6.22852	6.23697	6.04854	6.14969	6.13873	6.25317	1.0578	0.984714	0.963347	0.994141	1.06422	1.01345	1.03905	1.00997	0.942815	0.982985	1.01351	0.996058	0.99741	0.967276	0.983452	0.981699	0.0810646	-0.0222237	-0.0538726	-0.00847765	0.0897973	0.0192743	0.0552643	0.0143098	-0.0849534	-0.0247587	0.0193631	-0.00569777	-0.00374184
sp|Q8IYD1|ERF3B_HUMAN	GSPT2	ERF3B_HUMAN Eukaryotic peptide chain release factor GTP-binding subunit ERF3B	6	6.26883	6.17063	6.30758	6.40067	6.18027	6.32937	6.04221	6.59118	6.3033	6.19018	6.82695	6.56637	5.94616	5.84	6.21413	5.82218	6.28693	0.997121	0.981502	1.00328	1.01809	0.983035	1.00675	0.961075	1.04839	1.0026	0.984611	1.0859	1.04445	0.945797	0.928912	0.988421	0.926077	-0.00415892	-0.0269373	0.00473147	0.0258678	-0.0246853	0.00970678	-0.0572788	0.0681816	0.0037522	-0.0223738	0.118886	0.0627409	-0.0803968
tr|H0YCG1|H0YCG1_HUMAN	SF3B2	H0YCG1_HUMAN Splicing factor 3B subunit 2 (Fragment)	1	5.58619	7.34688	4.42483	6.78531	6.34787	7.85725	6.85614	6.04964	6.44041	6.44723	6.12389	5.69133	6.19095	7.40001	5.08686	5.36522	6.0358	0.925509	1.21722	0.733097	1.12418	1.0517	1.30177	1.13591	1.00229	1.06703	1.06816	1.01459	0.942928	1.0257	1.22602	0.842781	0.888899	-0.111681	0.283586	-0.447924	0.168869	0.072727	0.380479	0.183851	0.00330369	0.0936069	0.0951339	0.0209028	-0.0847798	0.0366152
sp|Q13435|SF3B2_HUMAN	SF3B2	SF3B2_HUMAN Splicing factor 3B subunit 2	82	6.17279	6.13808	6.37743	6.1271	6.42202	6.33883	6.23758	6.4864	6.31677	6.28533	5.83936	6.01377	5.92431	6.85025	6.22293	6.24705	6.20385	0.994993	0.989399	1.02798	0.987629	1.03517	1.02176	1.00544	1.04554	1.0182	1.01313	0.941248	0.969361	0.954941	1.10419	1.00308	1.00696	-0.00724109	-0.0153764	0.0398114	-0.0179594	0.0498634	0.0310528	0.00782261	0.0642542	0.0260232	0.0188247	-0.0873535	-0.0448941	-0.0665167
tr|H0YEX5|H0YEX5_HUMAN	SF3B2	H0YEX5_HUMAN Splicing factor 3B subunit 2 (Fragment)	1	3.64234	5.36759	5.39933	5.12286	6.71864	7.19105	9.33026	9.12867	5.79305	5.10196	4.67875	6.44677	5.48128	6.17278	7.17071	7.25395	4.88303	0.745918	1.09923	1.10573	1.04911	1.37592	1.47266	1.91075	1.86947	1.18636	1.04483	0.958165	1.32024	1.12252	1.26413	1.4685	1.48554	-0.422911	0.136498	0.145004	0.0691728	0.460393	0.558426	0.934141	0.902628	0.246546	0.0632749	-0.0616535	0.4008	0.166736
sp|Q969R5|LMBL2_HUMAN	L3MBTL2	LMBL2_HUMAN Lethal(3)malignant brain tumor-like protein 2	7	6.13016	6.80236	7.30121	6.18161	5.93055	5.55673	5.79102	5.91426	6.76102	6.30409	5.57974	6.02811	6.12569	6.64324	6.30438	6.64583	6.60384	0.928273	1.03006	1.1056	0.936064	0.898046	0.84144	0.876918	0.89558	1.0238	0.95461	0.844924	0.91282	0.927596	1.00597	0.954654	1.00636	-0.107379	0.0427313	0.144832	-0.0953214	-0.155138	-0.249068	-0.189487	-0.159106	0.0339368	-0.0670159	-0.243106	-0.131598	-0.108432
sp|Q05BQ5|MBTD1_HUMAN	MBTD1	MBTD1_HUMAN MBT domain-containing protein 1	3	6.21309	6.53168	7.00336	5.84352	6.14396	5.77025	6.45724	6.29327	6.27423	6.27515	5.74525	5.83866	5.82718	7.12267	6.20302	6.45748	6.39791	0.971112	1.02091	1.09463	0.913348	0.960307	0.901896	1.00927	0.983644	0.980668	0.980812	0.897988	0.912588	0.910794	1.11328	0.969538	1.00931	-0.0422903	0.0298529	0.130446	-0.130764	-0.0584324	-0.148967	0.0133164	-0.0237914	-0.0281628	-0.0279513	-0.155232	-0.131964	-0.134803
sp|Q9BV73|CP250_HUMAN	CEP250	CP250_HUMAN Centrosome-associated protein CEP250	30	5.95951	6.22893	6.41072	6.54585	6.10774	5.78943	6.08002	6.61476	6.42236	6.32193	6.31976	6.15363	6.29133	6.3792	6.18884	6.18599	6.28625	0.948023	0.990881	1.0198	1.0413	0.971603	0.920967	0.967193	1.05226	1.02165	1.00568	1.00533	0.978903	1.00081	1.01479	0.984504	0.984051	-0.0770065	-0.0132159	0.0282862	0.0583803	-0.0415616	-0.118779	-0.0481242	0.0734886	0.0309033	0.00816484	0.00766955	-0.0307625	0.00116482
sp|Q9NR12|PDLI7_HUMAN	PDLIM7	PDLI7_HUMAN PDZ and LIM domain protein 7	30	6.15315	6.13513	6.22941	6.52888	6.30395	5.8576	6.48115	6.10934	6.29847	6.37561	6.48676	6.40416	6.12802	6.22705	6.22095	6.06038	6.26164	0.982673	0.979796	0.994852	1.04268	1.00676	0.935473	1.03506	0.975677	1.00588	1.0182	1.03595	1.02276	0.97866	0.994475	0.993501	0.967858	-0.025216	-0.0294472	-0.00744561	0.0602944	0.00971495	-0.0962315	0.0497087	-0.0355246	0.00846028	0.0260222	0.0509569	0.0324682	-0.0311201
sp|P41440|S19A1_HUMAN	SLC19A1	S19A1_HUMAN Folate transporter 1	14	6.37767	5.90931	6.0249	6.4721	6.15474	6.67041	6.42123	6.10291	5.60349	6.43618	6.55653	6.85608	6.26519	5.73741	6.1825	6.22935	6.19599	1.02932	0.953731	0.972386	1.04456	0.993342	1.07657	1.03635	0.984977	0.904373	1.03876	1.05819	1.10653	1.01117	0.925987	0.997822	1.00538	0.0416935	-0.0683463	-0.0403987	0.0628979	-0.00963807	0.106439	0.0515137	-0.0218387	-0.14501	0.0548687	0.0815965	0.146048	0.0160223
sp|P37837|TALDO_HUMAN	TALDO1	TALDO_HUMAN Transaldolase	100	6.39588	6.08595	6.02215	6.37857	6.53281	6.01361	6.52407	6.12067	6.01742	6.40375	6.50209	6.27748	6.44701	5.97433	6.22098	6.08323	6.22064	1.02817	0.978348	0.968092	1.02539	1.05018	0.966719	1.04878	0.98393	0.967332	1.02944	1.04524	1.00914	1.03639	0.960405	1.00006	0.977911	0.0400804	-0.03158	-0.0467838	0.0361706	0.0706412	-0.0488311	0.0687098	-0.0233729	-0.0479174	0.0418545	0.0638411	0.0131231	0.0515678
sp|P06132|DCUP_HUMAN	UROD	DCUP_HUMAN Uroporphyrinogen decarboxylase	45	6.1513	5.9397	6.11877	6.82064	6.12354	6.56504	6.86793	5.40446	5.59439	6.28277	6.81348	6.64708	6.3235	5.95587	6.21838	6.17315	6.2576	0.983012	0.949197	0.977814	1.08998	0.978576	1.04913	1.09753	0.863663	0.894015	1.00402	1.08883	1.06224	1.01053	0.951781	0.993732	0.986504	-0.0247187	-0.07522	-0.0323683	0.124297	-0.0312441	0.0691938	0.134265	-0.21146	-0.161629	0.00579075	0.122782	0.0871107	0.0151133
sp|O94906|PRP6_HUMAN	PRPF6	PRP6_HUMAN Pre-mRNA-processing factor 6	33	5.82849	6.89932	7.61032	6.51263	6.17156	5.53792	6.03297	6.57834	6.62313	5.6564	5.50252	5.49031	6.07037	6.21168	6.5647	6.70934	6.71269	0.868279	1.0278	1.13372	0.970197	0.919387	0.824993	0.898741	0.979986	0.986658	0.842643	0.819719	0.8179	0.904313	0.925364	0.977954	0.999501	-0.203769	0.0395632	0.181066	-0.0436508	-0.121256	-0.277547	-0.154023	-0.0291674	-0.0193778	-0.247007	-0.286799	-0.290003	-0.145107
sp|Q9NV66|TYW1_HUMAN	TYW1	TYW1_HUMAN tRNA wybutosine-synthesizing protein 1 homolog	15	6.4135	6.24319	6.34314	6.26645	6.4499	5.96842	6.31218	6.09843	6.21113	6.29414	6.44811	6.39271	6.35723	6.06163	6.17028	5.96956	6.31657	1.01535	0.988383	1.00421	0.992065	1.02111	0.944883	0.999305	0.965465	0.983307	0.996449	1.02082	1.01205	1.00644	0.959639	0.97684	0.945064	0.0219705	-0.016858	0.00605582	-0.011493	0.0301354	-0.0817923	-0.00100302	-0.0507035	-0.0242856	-0.0051321	0.029735	0.0172863	0.00925692
sp|P62995|TRA2B_HUMAN	TRA2B	TRA2B_HUMAN Transformer-2 protein homolog beta	10	5.33996	7.13413	7.70221	5.15865	5.38377	6.83076	5.22942	6.54657	7.96186	5.14817	4.37883	5.29947	6.40833	7.04836	6.72738	7.70213	6.33374	0.843098	1.12637	1.21606	0.814472	0.850015	1.07847	0.825645	1.0336	1.25706	0.812817	0.69135	0.836705	1.01178	1.11283	1.06215	1.21605	-0.246228	0.17168	0.282215	-0.296064	-0.23444	0.108989	-0.276406	0.0476821	0.330048	-0.298997	-0.532512	-0.257209	0.0168914
sp|Q13595|TRA2A_HUMAN	TRA2A	TRA2A_HUMAN Transformer-2 protein homolog alpha	6	4.73173	7.36128	7.52763	5.39256	4.94366	5.13373	4.56878	8.05527	8.28815	5.34108	4.88623	5.13057	6.31083	6.57599	7.36775	8.38477	6.2533	0.756677	1.17718	1.20379	0.862354	0.790568	0.820963	0.730619	1.28816	1.3254	0.854122	0.781384	0.820458	1.0092	1.0516	1.17822	1.34086	-0.40225	0.235339	0.267578	-0.213647	-0.339038	-0.28461	-0.452809	0.365315	0.406432	-0.227486	-0.355896	-0.285499	0.013212
sp|Q9P2D3|HTR5B_HUMAN	HEATR5B	HTR5B_HUMAN HEAT repeat-containing protein 5B	26	6.21107	6.44833	6.29308	6.51424	6.45022	5.67335	6.2783	5.86717	6.28265	6.21671	6.39246	6.33357	6.42996	6.1158	6.24666	6.24643	6.36668	0.975559	1.01282	0.98844	1.02318	1.01312	0.8911	0.986118	0.921543	0.986802	0.976445	1.00405	0.994799	1.00994	0.960595	0.981149	0.981113	-0.0356994	0.0183843	-0.016775	0.0330556	0.0188071	-0.16634	-0.0201673	-0.117876	-0.019168	-0.03439	0.00582997	-0.00752233	0.0142685
[truncated: 7,846 more rows]
[truncated: 3 more columns]

## Sheet: Full curve - pbFDR
				TMT SSN scaled to 100 - log2 transformed																Palbociclib			Ribociclib			Abemaciclib
[truncated: 8,636 more rows]

## Sheet: Thermal window - Full dataset
				TMT SSN Scaled to 100																Vehicle mean	Fold change (treatment/vehicle_mean)																Fold change (treatment/vehicle_mean) - log2 transformed
[truncated: 7,618 more rows]
[truncated: 3 more columns]

[truncated: 1 more sheets: Thermal window - pbFDR]
