# Supplementary material for: Large-scale characterization of drug mechanism of action using proteome-wide thermal shift assays
Source: bioRxiv preprint, doi:10.1101/2024.01.26.577428, version 4 (2024-08-14)
Supplement: Figure 5 - source data 2 [file 577428_file16.xlsx]

## Sheet: Legend
This table contains PISA data for K562 lysates treated with 100 nM, 1 µM, or 10 µM AZD-7762
Full dataset
Protein Id
Gene Symbol
Description
Number of peptides	Number of quantified peptides
Veh_1_126	TMT SSN scaled to 100
Veh_2_127n	TMT SSN scaled to 100
Veh_3_127c	TMT SSN scaled to 100
Veh_4_128n	TMT SSN scaled to 100
100 nM_1_128c	TMT SSN scaled to 100
100 nM_2_129n	TMT SSN scaled to 100
100 nM_3_129c	TMT SSN scaled to 100
100 nM_4_130n	TMT SSN scaled to 100
1 uM_1_130c	TMT SSN scaled to 100
1 uM_2_131	TMT SSN scaled to 100
1 uM_3_131c	TMT SSN scaled to 100
1 uM_4_132n	TMT SSN scaled to 100
10 uM_1_132c	TMT SSN scaled to 100
10 uM_2_133n	TMT SSN scaled to 100
10 uM_3_133c	TMT SSN scaled to 100
10 uM_4_134n	TMT SSN scaled to 100
Veh_mean	Average of 4 vehicle-treated samples
Veh_1_126	Fold change (compared to Veh_mean)
Veh_2_127n	Fold change (compared to Veh_mean)
Veh_3_127c	Fold change (compared to Veh_mean)
Veh_4_128n	Fold change (compared to Veh_mean)
100 nM_1_128c	Fold change (compared to Veh_mean)
100 nM_2_129n	Fold change (compared to Veh_mean)
100 nM_3_129c	Fold change (compared to Veh_mean)
100 nM_4_130n	Fold change (compared to Veh_mean)
1 uM_1_130c	Fold change (compared to Veh_mean)
1 uM_2_131	Fold change (compared to Veh_mean)
1 uM_3_131c	Fold change (compared to Veh_mean)
1 uM_4_132n	Fold change (compared to Veh_mean)
10 uM_1_132c	Fold change (compared to Veh_mean)
10 uM_2_133n	Fold change (compared to Veh_mean)
10 uM_3_133c	Fold change (compared to Veh_mean)
10 uM_4_134n	Fold change (compared to Veh_mean)
Veh_1_126	Fold change (compared to Veh_mean) - log2 transformed
Veh_2_127n	Fold change (compared to Veh_mean) - log2 transformed
Veh_3_127c	Fold change (compared to Veh_mean) - log2 transformed
Veh_4_128n	Fold change (compared to Veh_mean) - log2 transformed
100 nM_1_128c	Fold change (compared to Veh_mean) - log2 transformed
100 nM_2_129n	Fold change (compared to Veh_mean) - log2 transformed
100 nM_3_129c	Fold change (compared to Veh_mean) - log2 transformed
100 nM_4_130n	Fold change (compared to Veh_mean) - log2 transformed
1 uM_1_130c	Fold change (compared to Veh_mean) - log2 transformed
1 uM_2_131	Fold change (compared to Veh_mean) - log2 transformed
1 uM_3_131c	Fold change (compared to Veh_mean) - log2 transformed
1 uM_4_132n	Fold change (compared to Veh_mean) - log2 transformed
10 uM_1_132c	Fold change (compared to Veh_mean) - log2 transformed
10 uM_2_133n	Fold change (compared to Veh_mean) - log2 transformed
10 uM_3_133c	Fold change (compared to Veh_mean) - log2 transformed
10 uM_4_134n	Fold change (compared to Veh_mean) - log2 transformed
pbFDR
Protein Id
Gene Symbol
Description
Number of peptides	Number of quantified peptides
Veh_1_126	TMT SSN Scaled to 100 - log2 transformed
Veh_2_127n	TMT SSN Scaled to 100 - log2 transformed
Veh_3_127c	TMT SSN Scaled to 100 - log2 transformed
Veh_4_128n	TMT SSN Scaled to 100 - log2 transformed
100 nM_1_128c	TMT SSN Scaled to 100 - log2 transformed
100 nM_2_129n	TMT SSN Scaled to 100 - log2 transformed
100 nM_3_129c	TMT SSN Scaled to 100 - log2 transformed
100 nM_4_130n	TMT SSN Scaled to 100 - log2 transformed
1 uM_1_130c	TMT SSN Scaled to 100 - log2 transformed
1 uM_2_131	TMT SSN Scaled to 100 - log2 transformed
1 uM_3_131c	TMT SSN Scaled to 100 - log2 transformed
1 uM_4_132n	TMT SSN Scaled to 100 - log2 transformed
10 uM_1_132c	TMT SSN Scaled to 100 - log2 transformed
10 uM_2_133n	TMT SSN Scaled to 100 - log2 transformed
10 uM_3_133c	TMT SSN Scaled to 100 - log2 transformed
10 uM_4_134n	TMT SSN Scaled to 100 - log2 transformed
Significant	100 nM AZD-7762 [yes (+) or no (-)]
-log10 p-value	100 nM AZD-7762 (compared to Vehicle)
log2 difference	100 nM AZD-7762 (compared to Vehicle)
Significant	1 µM AZD-7762 [yes (+) or no (-)]
-log10 p-value	1 µM AZD-7762 (compared to Vehicle)
log2 difference	1 µM AZD-7762 (compared to Vehicle)
Significant	10 µM AZD-7762 [yes (+) or no (-)]
-log10 p-value	10 µM AZD-7762 (compared to Vehicle)
log2 difference	10 µM AZD-7762 (compared to Vehicle)

## Sheet: Full dataset
				TMT SSN Scaled to 100																Vehicle mean	Fold change (treatment/vehicle_mean)																Fold change (treatment/vehicle_mean) - log2 transformed
ProteinID	GeneSymbol	Description	Peptides	Veh_1_126	Veh_2_127n	Veh_3_127c	Veh_4_128n	100 nM_1_128c	100 nM_2_129n	100 nM_3_129c	100 nM_4_130n	1 uM_1_130c	1 uM_2_131	1 uM_3_131c	1 uM_4_132n	10 uM_1_132c	10 uM_2_133n	10 uM_3_133c	10 uM_4_134n	Veh_mean	Veh_1_126	Veh_2_127n	Veh_3_127c	Veh_4_128n	100 nM_1_128c	100 nM_2_129n	100 nM_3_129c	100 nM_4_130n	1 uM_1_130c	1 uM_2_131	1 uM_3_131c	1 uM_4_132n	10 uM_1_132c	10 uM_2_133n	10 uM_3_133c	10 uM_4_134n	Veh_1_126	Veh_2_127n	Veh_3_127c	Veh_4_128n	100 nM_1_128c	100 nM_2_129n	100 nM_3_129c	100 nM_4_130n	1 uM_1_130c	1 uM_2_131	1 uM_3_131c	1 uM_4_132n	10 uM_1_132c
Q09666	AHNAK	Neuroblast differentiation-associated protein AHNAK	541	6.06843	6.19904	6.32962	6.15521	6.21992	6.46609	6.33945	6.1779	6.32256	6.35898	6.24977	6.21705	6.36102	6.24691	6.29803	5.99002	6.18808	0.980665	1.00177	1.02287	0.994689	1.00515	1.04493	1.02446	0.998356	1.02173	1.02762	1.00997	1.00468	1.02795	1.00951	1.01777	0.967994	-0.0281674	0.00255413	0.0326282	-0.0076826	0.00740534	0.0634029	0.034867	-0.00237416	0.0310181	0.0393047	0.0143124	0.0067395	0.0397674
P11142	HSPA8	Heat shock cognate 71 kDa protein	518	6.07838	6.20486	6.13638	6.36983	6.2199	6.54598	6.18825	6.26242	6.06091	6.32543	6.25958	6.06091	6.04561	6.33762	6.67103	6.23289	6.19736	0.980801	1.00121	0.99016	1.02783	1.00364	1.05625	0.99853	1.0105	0.977982	1.02066	1.01004	0.977982	0.975513	1.02263	1.07643	1.00573	-0.0279675	0.0017443	-0.0142665	0.0396005	0.00523703	0.0789548	-0.00212288	0.0150659	-0.0321199	0.0295092	0.0144115	-0.0321199	-0.0357664
P13639	EEF2	Elongation factor 2	493	6.17647	6.14396	6.09788	6.11648	6.26368	6.95977	6.08393	6.21392	6.13786	6.46445	6.24017	6.05511	6.13423	6.3218	6.4664	6.12389	6.1337	1.00697	1.00167	0.994161	0.997193	1.02119	1.13468	0.991886	1.01308	1.00068	1.05392	1.01736	0.987188	1.00009	1.03067	1.05424	0.998401	0.0100255	0.00241181	-0.00844926	-0.00405539	0.0302535	0.182283	-0.0117535	0.0187466	0.000978721	0.0757706	0.0248283	-0.0186038	0.000125243
P07900-2	HSP90AA1	Isoform 2 of Heat shock protein HSP 90-alpha	470	6.06784	6.14939	6.19623	6.26727	6.2384	6.46192	6.25424	6.26051	6.29021	6.34713	6.24776	6.10973	6.17697	6.33309	6.41862	6.1807	6.17018	0.983413	0.99663	1.00422	1.01573	1.01106	1.04728	1.01362	1.01464	1.01945	1.02868	1.01257	0.990202	1.0011	1.0264	1.04026	1.0017	-0.0241301	-0.00486985	0.00607754	0.022524	0.0158629	0.0666497	0.0195214	0.020967	0.027795	0.0407912	0.0180259	-0.0142045	0.00158616
P04406	GAPDH	Glyceraldehyde-3-phosphate dehydrogenase	431	6.23791	6.16965	6.11657	6.15854	6.31875	6.01788	6.18894	6.2734	6.44445	6.27332	6.20385	6.36065	6.68683	6.23623	6.13263	6.1804	6.17067	1.0109	0.999835	0.991233	0.998035	1.024	0.97524	1.00296	1.01665	1.04437	1.01664	1.00538	1.03079	1.08365	1.01062	0.993836	1.00158	0.0156362	-0.00023791	-0.0127037	-0.00283819	0.0342126	-0.0361712	0.00426578	0.023821	0.0626307	0.0238026	0.00773725	0.0437476	0.115896
P50990	CCT8	T-complex protein 1 subunit theta	393	6.25689	6.21517	6.32334	6.29253	6.30906	6.12981	6.27673	6.26936	6.22599	6.28089	6.27794	6.16854	6.3107	6.23469	6.20659	6.22177	6.27198	0.997594	0.990942	1.00819	1.00328	1.00591	0.977332	1.00076	0.999582	0.992667	1.00142	1.00095	0.983507	1.00617	0.994054	0.989574	0.991994	-0.00347579	-0.0131277	0.0117653	0.00471866	0.00850354	-0.0330792	0.00109162	-0.000603359	-0.0106183	0.00204747	0.00136971	-0.0239925	0.00887851
P18206	VCL	Vinculin	375	6.40686	6.21989	6.45397	6.18342	6.31554	5.20305	6.54811	6.45634	6.42626	6.14457	6.30076	6.50256	6.32242	6.37386	5.83173	6.31065	6.31603	1.01438	0.984778	1.02184	0.979003	0.999922	0.823784	1.03674	1.02221	1.01745	0.972852	0.997582	1.02953	1.00101	1.00916	0.923321	0.999147	0.0205983	-0.0221301	0.0311677	-0.0306142	-0.000113071	-0.279662	0.0520594	0.0316974	0.0249602	-0.0397071	-0.00349331	0.0419886	0.00145771
P62258	YWHAE	14-3-3 protein epsilon	335	6.41706	6.36334	6.36569	6.07554	6.291	6.05007	6.36499	6.18469	6.28092	6.25711	6.37679	6.40266	5.89145	6.16476	6.18527	6.32867	6.30541	1.01771	1.00919	1.00956	0.963544	0.997715	0.959505	1.00945	0.980855	0.996116	0.99234	1.01132	1.01542	0.934349	0.977694	0.980947	1.00369	0.0253229	0.0131946	0.0137273	-0.053577	-0.00330025	-0.0596378	0.0135686	-0.0278883	-0.00561372	-0.0110931	0.0162408	0.0220818	-0.0979669
P04075-2	ALDOA	Isoform 2 of Fructose-bisphosphate aldolase A	327	6.0915	6.03478	6.12773	6.69278	6.11154	6.68473	6.30781	6.08919	6.18064	6.1347	6.2008	6.24638	6.25307	6.45448	6.13409	6.25578	6.2367	0.976719	0.967624	0.982528	1.07313	0.979932	1.07184	1.0114	0.976348	0.991012	0.983646	0.994244	1.00155	1.00263	1.03492	0.983548	1.00306	-0.0339848	-0.0474811	-0.0254296	0.101823	-0.0292463	0.100087	0.0163569	-0.034532	-0.013026	-0.0237895	-0.00832793	0.00223805	0.00378238
P08238	HSP90AB1	Heat shock protein HSP 90-beta	326	6.15527	6.23255	6.20385	6.2492	6.26667	6.43699	6.27353	6.20153	6.19583	6.30261	6.20966	6.09498	6.34662	6.23545	6.39912	6.19615	6.21022	0.991152	1.0036	0.998975	1.00628	1.00909	1.03652	1.01019	0.998601	0.997683	1.01488	0.99991	0.981444	1.02196	1.00406	1.03042	0.997735	-0.0128217	0.00517875	-0.00147999	0.00902772	0.0130552	0.0517424	0.0146337	-0.00201961	-0.00334624	0.0213056	-0.000129519	-0.0270223	0.0313447
P68363	TUBA1B	Tubulin alpha-1B chain	318	6.19407	6.10461	6.31516	6.04331	6.2506	6.32924	6.28002	6.29445	6.43161	6.3893	6.2089	6.36121	6.32658	6.34713	6.01741	6.1064	6.16429	1.00483	0.990319	1.02448	0.980374	1.014	1.02676	1.01877	1.02112	1.04337	1.0365	1.00724	1.03195	1.02633	1.02966	0.976173	0.990609	0.00695354	-0.014035	0.0348851	-0.0285952	0.0200605	0.0380981	0.026835	0.0301462	0.0612458	0.0517237	0.0104035	0.0453671	0.0374917
P48643	CCT5	T-complex protein 1 subunit epsilon	306	6.28532	6.2797	6.06764	6.45581	6.23316	6.42756	6.13343	6.42601	5.93273	6.22083	6.22386	6.02647	6.04617	6.26432	6.57067	6.40632	6.27212	1.0021	1.00121	0.967399	1.02929	0.993789	1.02478	0.977888	1.02454	0.945889	0.991823	0.992306	0.960835	0.963976	0.998757	1.0476	1.0214	0.00303361	0.00174305	-0.0478171	0.0416455	-0.00898884	0.0353186	-0.0322585	0.0349706	-0.0802565	-0.0118455	-0.011143	-0.0576394	-0.052931
P31948-2	STIP1	Isoform 2 of Stress-induced-phosphoprotein 1	276	6.20252	6.37277	6.17596	6.28034	6.206	6.38149	6.20586	6.23384	5.99482	6.25699	6.27268	6.12079	6.30582	6.20712	6.44807	6.33491	6.2579	0.991151	1.01836	0.986907	1.00359	0.991707	1.01975	0.991685	0.996156	0.957961	0.999855	1.00236	0.97809	1.00766	0.991886	1.03039	1.01231	-0.0128235	0.0262426	-0.0190146	0.00516464	-0.0120143	0.0282153	-0.0120469	-0.0055569	-0.0619616	-0.00020923	0.00340394	-0.0319602	0.011006
P68133	ACTA1	Actin, alpha skeletal muscle	276	6.16281	6.09965	6.23859	6.21207	6.25607	6.23213	6.20694	6.15558	6.49565	6.36031	6.20965	6.27177	6.43413	6.41233	6.16892	6.0834	6.17828	0.997496	0.987273	1.00976	1.00547	1.01259	1.00872	1.00464	0.996326	1.05137	1.02946	1.00508	1.01513	1.04141	1.03788	0.998485	0.984643	-0.00361694	-0.0184788	0.0140147	0.00786883	0.0180514	0.0125201	0.00667694	-0.00531046	0.0722686	0.0418918	0.0073067	0.0216674	0.0585398
P14625	HSP90B1	Endoplasmin	273	6.19464	6.14239	6.27263	6.28299	6.30875	6.43437	6.26646	6.24688	6.32826	6.35819	6.15362	6.05282	6.17777	6.27584	6.29883	6.20556	6.22316	0.995417	0.987021	1.00795	1.00961	1.01375	1.03394	1.00696	1.00381	1.01689	1.0217	0.988825	0.972628	0.992706	1.00846	1.01216	0.997171	-0.00662748	-0.0188478	0.0114225	0.0138034	0.0197063	0.048151	0.0100028	0.0054879	0.024161	0.0309682	-0.0162126	-0.0400405	-0.0105618
P40926	MDH2	Malate dehydrogenase, mitochondrial	272	6.27988	6.13824	6.16418	6.35742	6.24641	6.53057	6.15841	6.23632	5.96662	6.17906	6.31827	6.18952	6.29976	6.23675	6.35676	6.34184	6.23493	1.00721	0.984492	0.988653	1.01965	1.00184	1.04742	0.987727	1.00022	0.956967	0.991039	1.01337	0.992717	1.0104	1.00029	1.01954	1.01715	0.0103636	-0.0225483	-0.0164644	0.028068	0.0026539	0.0668356	-0.0178154	0.000321595	-0.0634595	-0.012986	0.0191562	-0.0105458	0.0149235
P0DMV8	HSPA1A	Heat shock 70 kDa protein 1A	271	5.89372	6.01226	6.1662	6.99864	6.04699	6.44776	6.25956	6.17559	6.25539	6.28455	6.27216	6.09332	5.89023	6.46662	6.5706	6.16641	6.2677	0.940331	0.959244	0.983805	1.11662	0.964785	1.02873	0.9987	0.985303	0.998035	1.00269	1.00071	0.972177	0.939775	1.03174	1.04833	0.983839	-0.0887588	-0.0600299	-0.0235556	0.159137	-0.0517201	0.0408608	-0.00187603	-0.0213603	-0.00283744	0.00387217	0.00102508	-0.0407088	-0.0896133
Q14315	FLNC	Filamin-C	271	6.26989	6.81695	6.25944	6.05194	6.28454	5.8593	6.37702	6.23582	6.4069	6.08547	6.24431	6.29532	6.23238	6.37984	6.07222	6.12866	6.34956	0.987453	1.07361	0.985808	0.953128	0.989761	0.922789	1.00433	0.982088	1.00903	0.958409	0.983425	0.991458	0.981546	1.00477	0.956322	0.965211	-0.0182154	0.102471	-0.0206219	-0.0692578	-0.0148483	-0.115927	0.00622692	-0.0260762	0.012971	-0.0612868	-0.0241133	-0.0123758	-0.0268723
Q06830	PRDX1	Peroxiredoxin-1	264	6.11432	6.19339	6.25772	6.09716	6.17606	6.30774	6.271	6.16488	6.40463	6.35612	6.2965	6.40851	6.25729	6.34103	6.15827	6.19537	6.16565	0.991675	1.0045	1.01493	0.988892	1.00169	1.02305	1.01709	0.999876	1.03876	1.03089	1.02122	1.03939	1.01486	1.02845	0.998803	1.00482	-0.0120604	0.00647689	0.0213847	-0.016115	0.00243436	0.0328708	0.0244431	-0.000179598	0.0548628	0.043894	0.0302977	0.0557366	0.0212856
P49368	CCT3	T-complex protein 1 subunit gamma	256	6.3407	6.12584	6.33706	6.21931	6.29702	6.22737	6.31009	6.27251	6.14942	6.26989	6.31364	6.18045	6.24867	6.2693	6.23984	6.19888	6.25573	1.01358	0.979237	1.013	0.994179	1.0066	0.995467	1.00869	1.00268	0.983006	1.00226	1.00926	0.987967	0.998872	1.00217	0.99746	0.990913	0.0194644	-0.03027	0.018636	-0.00842314	0.00949158	-0.00655467	0.0124829	0.0038652	-0.0247273	0.00326246	0.0132943	-0.0174658	-0.00162852
P21333	FLNA	Filamin-A	242	6.28226	6.29443	6.47849	6.04611	6.3076	5.44884	6.52236	6.28488	6.60269	6.09825	6.27913	6.38826	6.30216	6.44231	5.93721	6.28503	6.27532	1.00111	1.00304	1.03238	0.963474	1.00514	0.868296	1.03937	1.00152	1.05217	0.971783	1.00061	1.018	1.00428	1.02661	0.94612	1.00155	0.00159405	0.00438614	0.045968	-0.0536824	0.00740157	-0.20374	0.0557045	0.0021956	0.0733643	-0.0412943	0.000875078	0.0257334	0.00615678
P10809	HSPD1	60 kDa heat shock protein, mitochondrial	239	6.13427	6.06484	6.29713	6.22981	6.20961	6.22402	6.37343	6.24522	6.4264	6.39728	6.22037	6.185	6.13101	6.42942	6.321	6.11119	6.18151	0.992357	0.981126	1.0187	1.00781	1.00455	1.00688	1.03105	1.01031	1.03962	1.03491	1.00629	1.00056	0.99183	1.0401	1.02257	0.988624	-0.0110682	-0.0274903	0.0267346	0.0112283	0.00654278	0.00988681	0.0441101	0.0147925	0.0560509	0.0494987	0.00904052	0.000813714	-0.0118351
Q14204	DYNC1H1	Cytoplasmic dynein 1 heavy chain 1	229	6.28565	6.217	6.36043	6.30181	6.35873	6.21653	6.14194	6.2974	6.29017	6.21116	6.22331	6.21242	6.20684	6.08908	6.26107	6.32645	6.29122	0.999114	0.988202	1.011	1.00168	1.01073	0.988128	0.976271	1.00098	0.999833	0.987274	0.989205	0.987474	0.986587	0.967869	0.995207	1.0056	-0.00127844	-0.0171218	0.0157839	0.00242587	0.0153983	-0.0172309	-0.034646	0.00141592	-0.000241378	-0.0184777	-0.0156583	-0.018185	-0.0194814
P49321	NASP	Nuclear autoantigenic sperm protein	227	6.15848	6.18368	6.17555	6.43466	6.25766	6.69812	6.2807	6.15685	6.0436	6.29583	6.18203	6.04488	5.97268	6.19511	6.66199	6.25818	6.23809	0.987238	0.991277	0.989974	1.03151	1.00314	1.07374	1.00683	0.986976	0.968822	1.00926	0.991013	0.969027	0.957453	0.99311	1.06795	1.00322	-0.0185306	-0.0126393	-0.0145373	0.044759	0.00451833	0.102651	0.00982041	-0.0189125	-0.0456968	0.0132916	-0.0130243	-0.0453912	-0.0627265
P37802-2	TAGLN2	Isoform 2 of Transgelin-2	226	6.52728	6.57242	5.92462	5.93663	6.37244	6.25227	6.0209	5.90102	6.36723	6.11984	6.39063	6.54558	6.08778	5.99168	6.41236	6.57732	6.24024	1.046	1.05323	0.949422	0.951347	1.02119	1.00193	0.964851	0.94564	1.02035	0.980706	1.0241	1.04893	0.975569	0.960169	1.02758	1.05402	0.064881	0.0748237	-0.0748783	-0.0719567	0.0302449	0.00277914	-0.0516218	-0.0806366	0.0290649	-0.028107	0.0343572	0.0689201	-0.0356847
P27816	MAP4	Microtubule-associated protein 4	224	6.07178	6.1126	6.1663	6.16461	6.16759	6.5219	6.41307	6.18942	6.29719	6.42761	6.21672	6.21888	6.00676	6.53695	6.27994	6.20866	6.12882	0.990693	0.997353	1.00611	1.00584	1.00633	1.06414	1.04638	1.00989	1.02747	1.04875	1.01434	1.01469	0.980084	1.06659	1.02466	1.01303	-0.0134904	-0.00382376	0.00879516	0.0083997	0.00909694	0.0896824	0.0654052	0.0141943	0.0390983	0.0686725	0.0205437	0.0210449	-0.0290229
Q13509	TUBB3	Tubulin beta-3 chain	222	6.12028	5.84067	6.20282	6.15461	6.4724	6.24916	6.0475	6.2695	6.44829	6.46128	6.37754	6.33398	6.313	6.34438	6.1689	6.19568	6.07959	1.00669	0.960701	1.02027	1.01234	1.06461	1.02789	0.994721	1.03124	1.06064	1.06278	1.04901	1.04184	1.03839	1.04355	1.01469	1.01909	0.00962244	-0.0578413	0.028949	0.0176922	0.0903256	0.0396871	-0.00763636	0.0443752	0.0849414	0.0878448	0.0690248	0.0591371	0.0543505
P49327	FASN	Fatty acid synthase	219	6.32476	6.15329	6.32885	6.34298	6.40606	6.43261	6.08813	6.3009	6.26705	6.25951	6.16419	6.20973	6.15051	6.07005	6.25022	6.25118	6.28747	1.00593	0.978659	1.00658	1.00883	1.01886	1.02308	0.968296	1.00214	0.996752	0.995553	0.980393	0.987636	0.978217	0.96542	0.994076	0.994228	0.00853112	-0.0311216	0.00946376	0.0126812	0.0269577	0.0329246	-0.0464804	0.0030783	-0.00469311	-0.00642989	-0.0285683	-0.0179491	-0.0317736
P06753-2	TPM3	Isoform 2 of Tropomyosin alpha-3 chain	219	6.1617	6.34175	5.89135	6.33961	6.22515	7.00754	5.92308	6.32195	5.67252	6.37166	6.24069	6.00045	6.05393	6.33152	6.79248	6.32462	6.1836	0.996458	1.02558	0.952738	1.02523	1.00672	1.13325	0.957869	1.02237	0.917349	1.03041	1.00923	0.970381	0.97903	1.02392	1.09847	1.02281	-0.00511914	0.0364334	-0.0698493	0.0359465	0.00966102	0.18046	-0.0621	0.031922	-0.124458	0.0432217	0.013258	-0.0433769	-0.0305756
P38646	HSPA9	Stress-70 protein, mitochondrial	213	5.99416	6.15554	6.02343	6.60597	6.10419	6.76811	6.16977	6.2277	6.22399	6.40757	6.06428	5.99754	5.90594	6.44703	6.76985	6.13492	6.19477	0.967615	0.993666	0.97234	1.06638	0.985377	1.09255	0.995964	1.00531	1.00472	1.03435	0.978935	0.968161	0.953374	1.04072	1.09283	0.990338	-0.0474943	-0.00916646	-0.0404666	0.0927185	-0.021252	0.127701	-0.00583517	0.00764757	0.00678786	0.0487255	-0.0307155	-0.046681	-0.0688852
P78371	CCT2	T-complex protein 1 subunit beta	210	6.19415	6.16081	6.30243	6.30698	6.28294	6.32201	6.30837	6.22391	6.26667	6.27088	6.22437	6.173	6.29728	6.21266	6.21358	6.23993	6.24109	0.992478	0.987136	1.00983	1.01056	1.00671	1.01297	1.01078	0.997247	1.0041	1.00477	0.997321	0.98909	1.009	0.995444	0.995592	0.999814	-0.0108923	-0.0186786	0.0141096	0.0151508	0.00964121	0.0185847	0.0154687	-0.0039774	0.00590043	0.00686932	-0.00387077	-0.0158268	0.0129302
P06576	ATP5F1B	ATP synthase subunit beta, mitochondrial	209	6.14582	6.0697	6.28681	6.33185	6.25713	6.06991	6.25523	6.27135	6.2517	6.21738	6.34775	6.28646	6.54401	6.30697	6.19821	6.15975	6.20854	0.989897	0.977636	1.01261	1.01986	1.00783	0.97767	1.00752	1.01012	1.00695	1.00142	1.02242	1.01255	1.05403	1.01585	0.998335	0.992141	-0.0146497	-0.03263	0.018073	0.0283719	0.0112459	-0.0325801	0.0108077	0.0145208	0.00999334	0.00205155	0.0319901	0.0179926	0.0759197
P35579	MYH9	Myosin-9	207	6.13661	6.40995	6.19109	6.22648	6.27919	6.52852	6.15688	6.24337	6.16905	6.35392	6.23405	6.10136	6.0898	6.25935	6.42642	6.19395	6.24103	0.983268	1.02707	0.991998	0.997668	1.00611	1.04606	0.986516	1.00037	0.988466	1.01809	0.998881	0.97762	0.975768	1.00294	1.0297	0.992456	-0.0243428	0.0385284	-0.0115913	-0.00336793	0.00879374	0.0649712	-0.0195853	0.000540242	-0.0167364	0.0258622	-0.001615	-0.0326539	-0.0353899
P25705	ATP5F1A	ATP synthase subunit alpha, mitochondrial	206	6.20233	6.1251	6.01643	6.58832	6.24742	6.96098	5.744	6.37153	5.91136	6.32776	6.2792	6.00589	6.11025	6.12841	6.72619	6.25483	6.23304	0.995072	0.982682	0.965247	1.057	1.00231	1.11679	0.92154	1.02222	0.94839	1.0152	1.0074	0.963556	0.980299	0.983213	1.07912	1.0035	-0.00712684	-0.0252037	-0.0510294	0.0799735	0.00332339	0.159353	-0.117881	0.0317027	-0.076447	0.0217578	0.0106436	-0.0535591	-0.0287057
O75369-8	FLNB	Isoform 8 of Filamin-B	204	6.21585	6.15932	6.32719	6.10919	6.18599	6.27197	6.43494	6.21596	6.27698	6.29498	6.21569	6.2067	6.34835	6.31499	6.19455	6.22736	6.20289	1.00209	0.992976	1.02004	0.984895	0.997276	1.01114	1.03741	1.00211	1.01194	1.01485	1.00206	1.00061	1.02345	1.01807	0.998656	1.00395	0.00301173	-0.0101689	0.028625	-0.0219588	-0.00393546	0.0159787	0.0529867	0.00303726	0.0171307	0.0212618	0.00297459	0.000886456	0.0334417
P50991	CCT4	T-complex protein 1 subunit delta	204	6.30396	6.18339	6.11372	6.79799	6.18589	6.52297	6.09441	6.20207	5.94183	6.15586	6.22886	5.90485	6.11646	6.04875	6.7577	6.44131	6.34976	0.992786	0.973798	0.962826	1.07059	0.974192	1.02728	0.959785	0.97674	0.935756	0.969463	0.980959	0.929932	0.963258	0.952594	1.06424	1.01442	-0.0104448	-0.0383052	-0.0546527	0.098405	-0.037722	0.0388258	-0.0592166	-0.0339534	-0.0957959	-0.0447428	-0.0277351	-0.104803	-0.0540063
P62937	PPIA	Peptidyl-prolyl cis-trans isomerase A	204	6.5167	6.63467	5.87163	6.78705	6.29388	6.61344	5.80723	6.315	5.48995	6.054	6.26411	6.05225	5.72884	5.78451	6.91107	6.87567	6.45251	1.00995	1.02823	0.909976	1.05185	0.975415	1.02494	0.899995	0.978689	0.850824	0.938239	0.970802	0.937968	0.887846	0.896474	1.07107	1.06558	0.0142806	0.0401637	-0.1361	0.0729236	-0.0359114	0.0355399	-0.152011	-0.0310783	-0.233068	-0.0919724	-0.0427515	-0.0923894	-0.171618
P11021	HSPA5	Endoplasmic reticulum chaperone BiP	203	6.54264	6.45515	5.96877	6.66723	6.32179	6.46909	5.96768	6.38445	5.44976	6.04489	6.30262	5.8669	6.01713	5.94414	6.84277	6.75499	6.40845	1.02094	1.00729	0.931391	1.04038	0.986478	1.00946	0.931221	0.996255	0.850403	0.943269	0.983486	0.915495	0.938937	0.927548	1.06777	1.05408	0.029898	0.0104757	-0.102541	0.0571126	-0.0196418	0.0135879	-0.102805	-0.00541255	-0.233782	-0.0842588	-0.0240232	-0.127376	-0.0908994
P14618	PKM	Pyruvate kinase PKM	203	6.02046	6.0421	6.17761	6.11818	6.17011	6.81324	6.24124	6.13866	6.34948	6.57588	6.15265	6.20409	6.34632	6.42681	6.17951	6.04368	6.08959	0.988648	0.992202	1.01445	1.0047	1.01322	1.11883	1.0249	1.00806	1.04268	1.07986	1.01036	1.0188	1.04216	1.05538	1.01477	0.992461	-0.0164708	-0.0112944	0.0207043	0.00675805	0.0189517	0.161997	0.0354882	0.0115793	0.0602939	0.110839	0.0148634	0.0268751	0.0595758
Q9Y490	TLN1	Talin-1	195	6.23892	6.24545	6.33446	6.34806	6.28321	6.16366	6.25	6.29909	6.176	6.31427	6.16735	6.13301	6.21111	6.22295	6.30273	6.30974	6.29172	0.991608	0.992645	1.00679	1.00895	0.998647	0.979646	0.993369	1.00117	0.981607	1.00358	0.980232	0.974774	0.987188	0.989069	1.00175	1.00286	-0.0121587	-0.0106495	0.0097666	0.0128607	-0.00195324	-0.0296678	-0.00959885	0.00168838	-0.0267823	0.00516091	-0.0288043	-0.0368597	-0.0186039
P35580-3	MYH10	Isoform 3 of Myosin-10	188	6.22949	6.29522	6.33815	6.05119	6.27493	6.23405	6.35038	6.24732	6.26719	6.57787	6.1776	6.12342	6.08267	6.36674	6.19674	6.18704	6.22851	1.00016	1.01071	1.0176	0.971531	1.00745	1.00089	1.01957	1.00302	1.00621	1.05609	0.991826	0.983127	0.976585	1.02219	0.994899	0.993342	0.000226398	0.0153691	0.0251741	-0.0416688	0.0107117	0.00128207	0.0279553	0.00434977	0.00893107	0.0787328	-0.0118412	-0.02455	-0.0341829
P55072	VCP	Transitional endoplasmic reticulum ATPase	187	6.26253	6.25496	6.1158	6.34002	6.34311	6.04306	6.24131	6.42028	6.24653	6.24038	6.2802	6.26972	6.2063	6.24398	6.2256	6.26622	6.24333	1.00308	1.00186	0.979574	1.01549	1.01598	0.967923	0.999677	1.02834	1.00051	0.999528	1.00591	1.00423	0.994069	1.0001	0.997161	1.00367	0.00443046	0.00268551	-0.0297739	0.0221722	0.0228752	-0.0470359	-0.000466275	0.0403211	0.000739837	-0.000681263	0.00849536	0.00608587	-0.00858171
P00338-3	LDHA	Isoform 3 of L-lactate dehydrogenase A chain	187	6.12809	6.18047	6.22114	6.20782	6.24299	6.68282	6.20522	6.24372	6.39973	6.28884	6.12727	6.12062	6.31346	6.24618	6.30383	6.08781	6.18438	0.990898	0.999368	1.00594	1.00379	1.00948	1.0806	1.00337	1.0096	1.03482	1.01689	0.990765	0.98969	1.02087	1.00999	1.01931	0.984385	-0.0131915	-0.000912415	0.00855	0.00545776	0.0136082	0.111828	0.00485339	0.0137769	0.0493821	0.024165	-0.0133845	-0.0149512	0.0298019
P34932	HSPA4	Heat shock 70 kDa protein 4	186	6.15748	6.11297	6.27915	6.28621	6.26459	6.09616	6.39894	6.24344	6.24809	6.32489	6.34065	6.11374	5.94509	6.35403	6.42921	6.40537	6.20895	0.99171	0.984541	1.01131	1.01244	1.00896	0.981834	1.0306	1.00555	1.0063	1.01867	1.02121	0.984665	0.957503	1.02337	1.03547	1.03163	-0.0120099	-0.0224764	0.0162194	0.0178406	0.0128702	-0.0264491	0.043483	0.00799125	0.00906534	0.0266905	0.0302808	-0.0222947	-0.0626512
P68104	EEF1A1	Elongation factor 1-alpha 1	185	6.15386	5.81549	6.38437	6.15365	6.09734	5.4975	6.60025	6.367	6.64689	6.20392	6.36731	6.68142	6.05862	6.85666	5.84011	6.2756	6.12684	1.00441	0.949182	1.04203	1.00438	0.995185	0.897281	1.07727	1.0392	1.08488	1.01258	1.03925	1.09052	0.988865	1.11912	0.953201	1.02428	0.00634786	-0.075243	0.0594005	0.00629863	-0.00696377	-0.156368	0.107377	0.05547	0.117536	0.0180363	0.0555402	0.125011	-0.0161545
P13796	LCP1	Plastin-2	182	6.3198	6.25613	6.27223	5.99289	6.35706	6.20019	6.3328	6.31065	6.19062	6.31273	6.29214	6.24343	6.27904	6.29349	6.12045	6.22636	6.21026	1.01764	1.00739	1.00998	0.964998	1.02364	0.998378	1.01973	1.01616	0.996837	1.0165	1.01318	1.00534	1.01107	1.0134	0.985538	1.00259	0.0252247	0.0106162	0.0143242	-0.0514024	0.0337055	-0.00234182	0.0281893	0.0231344	-0.00457035	0.0236098	0.0188965	0.00768458	0.0158898
P06733	ENO1	Alpha-enolase	182	5.93393	7.67178	5.87112	5.68541	5.9799	7.13944	7.48222	6.07332	6.06177	5.70282	5.90925	6.00785	5.81707	6.01078	5.98605	6.66728	6.29056	0.943307	1.21957	0.933322	0.9038	0.950615	1.13495	1.18944	0.965466	0.96363	0.906568	0.939384	0.955058	0.92473	0.955524	0.951593	1.05989	-0.0842005	0.286373	-0.0995527	-0.145924	-0.0730671	0.182622	0.250278	-0.0507031	-0.0534493	-0.141513	-0.0902134	-0.0663397	-0.112896
Q9UQ80	PA2G4	Proliferation-associated protein 2G4	180	6.27026	6.33577	6.22958	6.28268	6.31192	6.27563	6.20943	6.31822	6.15876	6.28507	6.26635	6.22501	5.94995	6.25903	6.26764	6.3547	6.27957	0.998517	1.00895	0.992039	1.00049	1.00515	0.999372	0.98883	1.00615	0.980761	1.00088	0.997894	0.991311	0.947509	0.996729	0.9981	1.01196	-0.00214108	0.0128536	-0.0115314	0.000713753	0.00741257	-0.000906051	-0.0162055	0.00885183	-0.0280264	0.00126247	-0.00304099	-0.0125902	-0.0777888
Q13263	TRIM28	Transcription intermediary factor 1-beta	178	6.29054	6.15023	6.30408	6.25327	6.29492	6.0589	6.30326	6.26618	6.38021	6.29133	6.30071	6.27642	6.20986	6.17057	6.13041	6.31911	6.24953	1.00656	0.984111	1.00873	1.0006	1.00726	0.969497	1.0086	1.00266	1.02091	1.00669	1.00819	1.0043	0.993652	0.987365	0.980939	1.01113	0.00943617	-0.0231073	0.0125381	0.000863115	0.0104403	-0.0446918	0.0123505	0.00383852	0.0298562	0.00961734	0.0117667	0.0061942	-0.00918695
P17987	TCP1	T-complex protein 1 subunit alpha	177	6.36006	6.33391	6.18151	6.29883	6.32372	6.28552	6.14661	6.36788	6.10187	6.13694	6.24045	6.13115	6.36276	6.25741	6.22273	6.24864	6.29358	1.01056	1.00641	0.982193	1.00083	1.00479	0.99872	0.976648	1.01181	0.969539	0.975112	0.991558	0.974192	1.01099	0.994253	0.988743	0.99286	0.01516	0.00921604	-0.025921	0.00120354	0.00689316	-0.00184823	-0.0340894	0.0169328	-0.0446289	-0.0363609	-0.0122303	-0.0377226	0.0157724
Q05639	EEF1A2	Elongation factor 1-alpha 2	175	6.10955	5.99709	6.32312	6.11371	6.18428	5.9877	6.35179	6.35871	6.50831	6.29646	6.19482	6.25864	6.76224	6.30161	6.14117	6.11079	6.13587	0.995711	0.977383	1.03052	0.996389	1.00789	0.975852	1.03519	1.03632	1.0607	1.02617	1.00961	1.02001	1.10208	1.02701	1.00086	0.995913	-0.00620121	-0.0330047	0.0433693	-0.00521921	0.0113383	-0.0352654	0.0498959	0.0514668	0.0850156	0.0372736	0.013795	0.0285819	0.140234
P12270	TPR	Nucleoprotein TPR	170	6.15954	6.37811	6.22905	6.14504	6.22555	6.37842	6.30654	6.20094	6.13942	6.32745	6.32068	6.18371	6.08491	6.31709	6.40208	6.20147	6.22794	0.989018	1.02411	1.00018	0.98669	0.999617	1.02416	1.01262	0.995665	0.985787	1.01598	1.01489	0.992899	0.977035	1.01432	1.02796	0.995751	-0.0159313	0.0343751	0.000258266	-0.0193315	-0.000552589	0.0344452	0.0180948	-0.00626696	-0.0206515	0.0228703	0.0213259	-0.0102812	-0.033518
P22392-2	NME2	Isoform 3 of Nucleoside diphosphate kinase B	170	6.26932	6.13009	6.44375	6.49796	6.09961	5.71498	6.45549	6.14501	6.68849	6.04336	6.1413	6.33123	6.60452	6.18873	5.88677	6.3594	6.33528	0.989588	0.967612	1.01712	1.02568	0.9628	0.902088	1.01897	0.969967	1.05575	0.953922	0.969381	0.999361	1.0425	0.976868	0.929204	1.00381	-0.0150994	-0.0475001	0.0244921	0.0365785	-0.0546914	-0.14866	0.0271182	-0.043993	0.0782722	-0.0680575	-0.0448643	-0.000922577	0.0600453
P26639	TARS1	Threonine--tRNA ligase 1, cytoplasmic	169	6.19159	6.14529	6.25186	6.17776	6.2336	6.87846	6.16636	6.23007	6.14691	6.24706	6.21006	6.11316	6.19902	6.16783	6.45239	6.1886	6.19163	0.999994	0.992517	1.00973	0.997761	1.00678	1.11093	0.995919	1.00621	0.992778	1.00895	1.00298	0.987327	1.00119	0.996157	1.04212	0.999511	-8.15529e-06	-0.010837	0.0139674	-0.00323427	0.00974749	0.151768	-0.00589898	0.00893028	-0.0104567	0.0128593	0.00428911	-0.0183998	0.00172206
P00558	PGK1	Phosphoglycerate kinase 1	168	5.93201	5.91712	6.04633	6.39612	6.1408	8.35087	5.98278	6.03023	5.992	6.27226	6.04646	5.93412	6.2793	6.15144	6.48521	6.04296	6.07289	0.976801	0.974349	0.995626	1.05322	1.01118	1.37511	0.985161	0.992975	0.986679	1.03283	0.995647	0.977148	1.03399	1.01293	1.06789	0.995071	-0.0338634	-0.0374893	-0.0063247	0.0748126	0.0160422	0.459542	-0.0215684	-0.0101714	-0.0193468	0.0466009	-0.00629369	-0.0333503	0.0482193
Q9UPN3	MACF1	Microtubule-actin cross-linking factor 1, isoforms 1/2/3/5	167	6.17452	6.19543	6.39403	6.34689	6.27448	5.93099	6.3187	6.33278	6.35135	6.26239	6.20404	6.22441	6.2327	6.22397	6.23072	6.30263	6.27772	0.983561	0.986892	1.01853	1.01102	0.999484	0.944769	1.00653	1.00877	1.01173	0.997558	0.988264	0.991508	0.992829	0.991438	0.992514	1.00397	-0.0239131	-0.0190357	0.0264854	0.0158097	-0.000744208	-0.0819672	0.00938766	0.0125989	0.0168232	-0.00352675	-0.0170321	-0.012303	-0.0103828
O43707	ACTN4	Alpha-actinin-4	165	6.07115	6.16224	6.24355	6.24351	6.28406	6.25597	6.2772	6.19775	6.27372	6.35901	6.17966	6.16242	6.26632	6.46987	6.39262	6.16095	6.18011	0.982369	0.997108	1.01026	1.01026	1.01682	1.01227	1.01571	1.00285	1.01515	1.02895	0.999927	0.997137	1.01395	1.04689	1.03439	0.996899	-0.0256633	-0.00417823	0.0147335	0.0147242	0.0240639	0.0176005	0.0224881	0.00411146	0.021688	0.0411691	-0.000105636	-0.00413609	0.0199853
P07737	PFN1	Profilin-1	165	6.15537	6.05243	6.26679	6.46604	6.3012	5.79739	6.4208	6.29998	6.52859	6.20187	6.21585	6.40955	6.24776	6.26897	5.97405	6.39336	6.23516	0.987204	0.970694	1.00507	1.03703	1.01059	0.92979	1.02977	1.0104	1.04706	0.994661	0.996903	1.02797	1.00202	1.00542	0.958123	1.02537	-0.0185804	-0.0429115	0.00730065	0.0524564	0.0152006	-0.105022	0.0423271	0.0149212	0.0663454	-0.00772272	-0.00447431	0.0397971	0.00291303
Q14974	KPNB1	Importin subunit beta-1	163	6.29746	5.94156	6.5211	6.11953	6.28768	5.79351	6.55185	6.36342	6.55966	6.18327	6.26603	6.37608	6.23377	6.2557	5.99908	6.25028	6.21991	1.01247	0.955248	1.04842	0.983861	1.0109	0.931446	1.05337	1.02307	1.05462	0.994109	1.00741	1.02511	1.00223	1.00575	0.964496	1.00488	0.0178758	-0.0660525	0.0682211	-0.0234734	0.0156335	-0.102457	0.075008	0.0329081	0.0767268	-0.00852428	0.0106574	0.0357754	0.00321064
Q92945	KHSRP	Far upstream element-binding protein 2	159	6.40868	6.31876	6.03097	6.5494	6.11542	6.32526	6.07859	6.11193	6.11627	6.06855	6.33555	6.29708	6.13535	6.13446	6.5896	6.38414	6.32695	1.01292	0.998705	0.953219	1.03516	0.966566	0.999732	0.960745	0.966015	0.966701	0.959158	1.00136	0.995279	0.969716	0.969576	1.04151	1.00904	0.0185165	-0.00186929	-0.0691207	0.049852	-0.0490592	-0.000385982	-0.0577741	-0.0498827	-0.0488587	-0.0601589	0.0019591	-0.00682777	-0.0443651
P07237	P4HB	Protein disulfide-isomerase	157	6.2804	6.356	5.90187	7.09682	6.27813	7.12038	5.54939	6.1984	5.63648	6.31791	5.93335	5.91919	5.6988	6.0321	7.13676	6.54401	6.40877	0.979969	0.991766	0.920905	1.10736	0.979615	1.11104	0.865905	0.967174	0.879494	0.985822	0.925817	0.923607	0.889219	0.941225	1.11359	1.0211	-0.0291916	-0.0119289	-0.118876	0.147125	-0.0297132	0.151906	-0.207719	-0.0481522	-0.185254	-0.0206007	-0.111201	-0.114648	-0.16939
P46821	MAP1B	Microtubule-associated protein 1B	155	6.22357	6.21258	6.25927	6.20971	6.22684	6.05589	6.27933	6.27623	6.12502	6.37349	6.34456	6.18454	6.15431	6.39973	6.35273	6.32219	6.22628	0.999564	0.997799	1.0053	0.997338	1.00009	0.972633	1.00852	1.00802	0.983736	1.02364	1.019	0.993296	0.988441	1.02786	1.02031	1.0154	-0.000628652	-0.00317851	0.00762337	-0.00384514	0.000129173	-0.040032	0.0122396	0.0115272	-0.0236565	0.0337125	0.0271491	-0.00970474	-0.0167739
P26038	MSN	Moesin	154	6.14239	6.27453	6.09366	6.45099	6.29724	6.53873	6.06882	6.318	6.02672	6.34683	6.20646	6.08217	6.11718	6.1833	6.52767	6.32531	6.24039	0.984295	1.00547	0.976487	1.03375	1.00911	1.04781	0.972506	1.01244	0.96576	1.01706	0.994562	0.974645	0.980256	0.990851	1.04604	1.01361	-0.0228367	0.00787062	-0.0343278	0.0478838	0.0130829	0.0673737	-0.0402207	0.0178312	-0.0502637	0.0243994	-0.00786614	-0.0370506	-0.02877
P07195	LDHB	L-lactate dehydrogenase B chain	153	6.06201	5.95749	6.36641	6.06713	6.25147	5.74694	6.51029	6.28319	6.49907	6.27617	6.25653	6.46392	6.48064	6.578	5.89047	6.31026	6.11326	0.991617	0.974519	1.04141	0.992454	1.02261	0.940078	1.06495	1.0278	1.06311	1.02665	1.02344	1.05736	1.0601	1.07602	0.963556	1.03223	-0.0121457	-0.0372373	0.0585381	-0.0109277	0.0322535	-0.0891479	0.0907799	0.0395553	0.0882914	0.0379425	0.0334208	0.0804674	0.0841944
Q7Z6Z7	HUWE1	E3 ubiquitin-protein ligase HUWE1	150	6.2151	6.22327	6.25799	6.35302	6.23523	6.32237	6.24058	6.298	6.12598	6.19554	6.25627	6.19564	6.36647	6.16172	6.2925	6.26031	6.26234	0.992456	0.99376	0.999305	1.01448	0.99567	1.00959	0.996524	1.00569	0.978225	0.989332	0.99903	0.989348	1.01663	0.983932	1.00482	0.999675	-0.0109254	-0.00903015	-0.00100364	0.0207396	-0.00626021	0.0137625	-0.00502287	0.00819077	-0.0317623	-0.015473	-0.00140021	-0.0154497	0.0237907
P23528	CFL1	Cofilin-1	150	5.95355	6.0787	6.00926	6.65143	6.36848	6.563	6.0824	6.34126	5.82554	6.33435	6.38836	6.13689	5.67681	6.37963	6.78518	6.42516	6.17324	0.964413	0.984686	0.973438	1.07746	1.03163	1.06314	0.985286	1.02722	0.943677	1.0261	1.03485	0.994112	0.919584	1.03343	1.09913	1.04081	-0.0522765	-0.0222639	-0.0388394	0.107638	0.0449224	0.0883287	-0.021386	0.0387428	-0.0836349	0.0371699	0.0494189	-0.00851899	-0.120946
P19338	NCL	Nucleolin	149	6.07491	6.18746	6.09582	6.41766	6.13316	6.66964	6.23672	6.1982	5.96374	6.33769	6.33176	6.03694	6.06667	6.39835	6.61433	6.23695	6.19396	0.980779	0.99895	0.984155	1.03612	0.990184	1.0768	1.0069	1.00068	0.962831	1.0232	1.02225	0.974649	0.979449	1.033	1.06787	1.00694	-0.0279996	-0.00151536	-0.0230423	0.0511847	-0.0142321	0.106746	0.00992484	0.000986659	-0.0546453	0.0330944	0.0317439	-0.0370452	-0.0299578
Q5T4S7-2	UBR4	Isoform 2 of E3 ubiquitin-protein ligase UBR4	145	6.32089	6.11055	6.44408	6.58424	6.30665	5.71132	6.36731	6.3102	6.52033	6.08288	6.21055	6.32087	6.38399	6.11728	5.99689	6.21197	6.36494	0.993079	0.960033	1.01243	1.03445	0.990842	0.897309	1.00037	0.9914	1.02441	0.955685	0.975744	0.993076	1.00299	0.96109	0.942175	0.975967	-0.0100192	-0.0588447	0.0178275	0.04887	-0.013273	-0.156323	0.000537091	-0.0124612	0.0347981	-0.0653924	-0.0354259	-0.0100238	0.00431148
P18669	PGAM1	Phosphoglycerate mutase 1	144	6.1793	6.09315	6.06261	6.42194	6.22788	6.41198	6.21956	6.0545	6.16885	6.25663	6.20203	6.2355	6.75361	6.26805	6.18452	6.25991	6.18925	0.998392	0.984473	0.979539	1.0376	1.00624	1.03599	1.0049	0.978228	0.996704	1.01089	1.00206	1.00747	1.09118	1.01273	0.999236	1.01142	-0.00232118	-0.0225763	-0.0298256	0.0532446	0.00897655	0.0510053	0.00704792	-0.0317568	-0.00476303	0.0156212	0.00297591	0.0107407	0.125894
Q16531	DDB1	DNA damage-binding protein 1	143	6.45086	6.30635	6.23667	6.29868	6.32277	6.23312	6.27678	6.29355	6.10651	6.15712	6.3028	6.18788	6.38438	5.99324	6.12983	6.31946	6.32314	1.0202	0.997345	0.986325	0.996132	0.999941	0.985763	0.992668	0.99532	0.96574	0.973744	0.996783	0.978609	1.00969	0.947827	0.969428	0.999418	0.0288503	-0.00383592	-0.0198652	-0.00559164	-8.44221e-05	-0.0206867	-0.0106165	-0.00676714	-0.0502931	-0.0383855	-0.00464828	-0.0311959	0.0139054
P30101	PDIA3	Protein disulfide-isomerase A3	140	5.92577	5.96504	5.98326	6.73947	6.15663	7.3859	6.10753	6.14272	6.1223	6.37888	6.14033	5.89349	5.98309	6.23508	6.73648	6.10403	6.15339	0.96301	0.969392	0.972353	1.09525	1.00053	1.2003	0.992548	0.998267	0.994948	1.03665	0.997878	0.957764	0.972325	1.01328	1.09476	0.991979	-0.0543776	-0.0448484	-0.0404485	0.131255	0.000760608	0.263393	-0.0107912	-0.00250264	-0.00730652	0.0519229	-0.00306407	-0.062258	-0.0404895
P40227	CCT6A	T-complex protein 1 subunit zeta	140	6.16618	6.24607	6.05582	6.33699	6.24818	6.62936	6.09339	6.31419	6.31598	6.16936	6.17815	6.00025	6.26022	6.31888	6.57693	6.09005	6.20127	0.994342	1.00723	0.976546	1.02189	1.00757	1.06903	0.982604	1.01821	1.0185	0.994855	0.996273	0.967585	1.00951	1.01897	1.06058	0.982066	-0.00818554	0.0103862	-0.0342402	0.0312352	0.0108735	0.0963071	-0.0253175	0.0260351	0.0264441	-0.00744171	-0.00538764	-0.0475399	0.0136508
P23381	WARS	Tryptophan--tRNA ligase, cytoplasmic	139	5.93311	6.03184	6.09466	6.20901	6.12216	6.56987	6.09257	6.08112	6.21743	6.26059	6.12577	6.19623	7.3624	6.45656	6.26132	5.98537	6.06715	0.977906	0.994179	1.00453	1.02338	1.00907	1.08286	1.00419	1.0023	1.02477	1.03188	1.00966	1.02127	1.21348	1.06418	1.032	0.98652	-0.0322316	-0.00842201	0.00652557	0.0333431	0.0130206	0.114845	0.00603075	0.00331689	0.0352982	0.0452785	0.013871	0.0303705	0.279156
Q96AE4-2	FUBP1	Isoform 2 of Far upstream element-binding protein 1	139	6.44189	6.42869	6.06952	6.03193	6.36332	6.14367	6.31244	6.17506	6.40764	6.23683	6.2554	6.39844	6.04302	6.20823	6.1976	6.28633	6.24301	1.03186	1.02974	0.972211	0.96619	1.01927	0.984088	1.01112	0.989116	1.02637	0.99901	1.00199	1.0249	0.967966	0.994429	0.992727	1.00694	0.0452428	0.0422836	-0.0406588	-0.0496215	0.0275385	-0.0231405	0.0159566	-0.015788	0.0375519	-0.00142826	0.00286094	0.035479	-0.0469715
P07355-2	ANXA2	Isoform 2 of Annexin A2	137	6.08623	6.20082	6.08344	6.44761	6.26188	6.27843	6.01735	6.49311	6.11783	6.22818	6.26969	6.06259	6.23596	6.22939	6.73753	6.24995	6.20453	0.980934	0.999403	0.980484	1.03918	1.00924	1.01191	0.969833	1.04651	0.986027	1.00381	1.0105	0.977124	1.00507	1.00401	1.08591	1.00732	-0.0277719	-0.000861755	-0.0284334	0.0554437	0.0132751	0.0170831	-0.0441925	0.0655889	-0.0203007	0.00548987	0.0150733	-0.0333865	0.00729091
P34897	SHMT2	Serine hydroxymethyltransferase, mitochondrial	137	6.40681	6.40973	6.20021	6.16005	6.2792	6.0793	6.13824	6.44013	6.24942	6.26659	6.21398	6.27013	6.43194	6.14478	6.09648	6.213	6.2942	1.01789	1.01835	0.985067	0.978687	0.997617	0.965857	0.975222	1.02318	0.992886	0.995613	0.987255	0.996176	1.02188	0.976261	0.968587	0.987099	0.0255832	0.0262406	-0.0217059	-0.031081	-0.00344226	-0.0501178	-0.036198	0.0330668	-0.0103007	-0.00634242	-0.0185054	-0.00552767	0.0312309
P13010	XRCC5	X-ray repair cross-complementing protein 5	137	6.16749	6.04858	6.25575	6.05256	6.35371	6.75898	6.18025	6.23904	6.34838	6.46047	6.3106	6.19131	6.10449	6.13642	6.30169	6.09029	6.1311	1.00594	0.986542	1.02033	0.987191	1.03631	1.10241	1.00802	1.01761	1.03544	1.05372	1.02928	1.00982	0.995661	1.00087	1.02782	0.993345	0.00853871	-0.0195483	0.0290381	-0.0185993	0.0514545	0.140661	0.0115204	0.0251793	0.0502437	0.0754944	0.0416324	0.0140999	-0.00627399
Q02790	FKBP4	Peptidyl-prolyl cis-trans isomerase FKBP4	134	6.29361	6.23304	6.10258	6.30241	6.33514	7.22076	6.00526	6.27069	5.9319	6.18542	6.17913	6.09161	6.12201	6.09063	6.35504	6.28078	6.23291	1.00974	1.00002	0.97909	1.01115	1.0164	1.15849	0.963476	1.00606	0.951706	0.992381	0.991372	0.97733	0.982207	0.977173	1.01959	1.00768	0.0139819	3.009e-05	-0.0304866	0.0159977	0.0234706	0.212245	-0.0536792	0.00871832	-0.0714116	-0.0110343	-0.0125022	-0.0330823	-0.0259005
P15170-3	GSPT1	Isoform 3 of Eukaryotic peptide chain release factor GTP-binding subunit ERF3A	133	6.20693	6.11844	6.31804	6.05015	6.11152	6.22704	6.39917	6.31667	6.4204	6.36549	6.18612	6.33474	6.37185	6.41651	5.96871	6.1882	6.17339	1.00543	0.991099	1.02343	0.980037	0.989978	1.00869	1.03657	1.02321	1.04001	1.03112	1.00206	1.02614	1.03215	1.03938	0.966845	1.0024	0.00781694	-0.0128991	0.0334141	-0.029092	-0.0145317	0.0124836	0.0518219	0.0331013	0.0566002	0.0442086	0.00297188	0.0372225	0.0456494
O14980	XPO1	Exportin-1	133	6.47576	6.12344	6.39814	6.36166	6.40643	5.64875	6.26488	6.41562	6.48154	6.02257	6.23455	6.45711	6.47375	5.95439	5.90173	6.37966	6.33975	1.02145	0.96588	1.00921	1.00346	1.01052	0.891005	0.98819	1.01197	1.02237	0.94997	0.983406	1.01851	1.02114	0.939215	0.930909	1.0063	0.0306236	-0.0500836	0.0132266	0.00497732	0.0150947	-0.166494	-0.0171391	0.0171627	0.0319107	-0.0740467	-0.0241405	0.0264627	0.0301757
Q86VP6	CAND1	Cullin-associated NEDD8-dissociated protein 1	132	6.36678	6.00539	6.28633	6.0404	6.22246	6.94948	6.30666	6.25117	6.34781	6.25393	6.20261	6.27203	6.22854	6.06829	6.05349	6.14462	6.17473	1.0311	0.972576	1.01807	0.978246	1.00773	1.12547	1.02137	1.01238	1.02803	1.01283	1.00452	1.01576	1.00872	0.982763	0.980366	0.995124	0.044189	-0.0401169	0.0258431	-0.0317308	0.0111102	0.17053	0.0305013	0.0177514	0.0398841	0.0183882	0.00650053	0.0225576	0.0125191
P49588	AARS	Alanine--tRNA ligase, cytoplasmic	132	6.17725	6.16158	6.1888	6.37881	6.31723	6.6478	6.04582	6.20295	6.10027	6.26443	6.14225	6.05334	6.25347	6.23253	6.45152	6.38197	6.22661	0.992073	0.989556	0.993928	1.02444	1.01455	1.06764	0.970965	0.9962	0.97971	1.00607	0.986452	0.972173	1.00431	1.00095	1.03612	1.02495	-0.0114822	-0.0151466	-0.00878722	0.0348404	0.0208452	0.0944301	-0.0425089	-0.00549242	-0.0295738	0.00873633	-0.0196797	-0.0407155	0.00621003
P41250	GARS1	Glycine--tRNA ligase	132	6.21321	6.21667	6.26662	6.2058	6.30735	6.07397	6.31875	6.26011	6.33952	6.31999	6.19277	6.21138	6.24311	6.27809	6.24863	6.30402	6.22558	0.998014	0.99857	1.00659	0.996824	1.01314	0.975648	1.01497	1.00555	1.0183	1.01517	0.994731	0.99772	1.00282	1.00844	1.0037	1.0126	-0.00286828	-0.00206509	0.00948042	-0.00458989	0.0188269	-0.0355673	0.0214321	0.00798092	0.0261665	0.0217152	-0.00762223	-0.00329326	0.00405779
Q00325	SLC25A3	Phosphate carrier protein, mitochondrial	132	6.23869	6.10095	6.16618	6.08409	6.30595	6.77874	6.34126	6.1955	6.30471	6.22487	6.18694	6.25023	6.51473	6.32507	6.05059	5.93149	6.14748	1.01484	0.992431	1.00304	0.989689	1.02578	1.10269	1.03152	1.00781	1.02558	1.01259	1.00642	1.01671	1.05974	1.02889	0.984239	0.964866	0.0212486	-0.0109606	0.00438245	-0.0149531	0.0367192	0.141023	0.044775	0.0112262	0.0364355	0.0180492	0.00923149	0.0239147	0.0837108
P37837	TALDO1	Transaldolase	131	6.41723	6.43403	6.00144	6.48823	6.39322	6.83028	5.92562	6.33256	5.59796	6.21054	6.2537	5.83374	6.05795	5.92908	6.82427	6.47015	6.33523	1.01294	1.01559	0.947312	1.02415	1.00915	1.07814	0.935344	0.999578	0.883623	0.980318	0.98713	0.920841	0.956232	0.93589	1.07719	1.0213	0.0185531	0.0223251	-0.0780889	0.0344274	0.0131452	0.108547	-0.0964315	-0.000608725	-0.178496	-0.0286789	-0.0186876	-0.118976	-0.0645679
P27797	CALR	Calreticulin	131	6.27245	6.46795	6.55358	6.367	6.02829	5.72048	6.77143	6.3642	6.23152	6.20779	6.21815	5.98851	5.81078	6.41545	6.0506	6.53183	6.41525	0.977741	1.00822	1.02156	0.99248	0.939682	0.891701	1.05552	0.992043	0.971361	0.967662	0.969277	0.933481	0.905777	1.00003	0.94316	1.01817	-0.0324753	0.0118042	0.0307789	-0.0108906	-0.0897555	-0.165368	0.0779562	-0.0115252	-0.0419203	-0.0474246	-0.0450189	-0.0993073	-0.142773
P69891	HBG1	Hemoglobin subunit gamma-1	130	6.26079	6.66723	6.09744	6.10029	6.43883	6.19412	6.04295	6.27938	6.47401	6.05055	6.16244	6.26393	6.38773	6.13877	6.22471	6.21684	6.28144	0.996713	1.06142	0.970708	0.971161	1.02506	0.986099	0.962033	0.999672	1.03066	0.963243	0.981056	0.997213	1.01692	0.977287	0.990969	0.989716	-0.00475005	0.0859927	-0.0428911	-0.0422169	0.0357038	-0.0201954	-0.0558418	-0.000472636	0.0435648	-0.0540285	-0.0275931	-0.00402667	0.0242086
P53396	ACLY	ATP-citrate synthase	129	6.32552	6.12988	6.33901	6.34365	6.36764	6.13366	6.13832	6.31664	6.23739	6.21893	6.17299	6.13716	6.30079	6.06572	6.27603	6.49669	6.28451	1.00652	0.975394	1.00867	1.00941	1.01323	0.975996	0.976737	1.00511	0.992501	0.989564	0.982254	0.976553	1.00259	0.965185	0.99865	1.03376	0.00938267	-0.0359426	0.0124561	0.0135118	0.0189574	-0.0350532	-0.0339576	0.00735594	-0.0108589	-0.015135	-0.025832	-0.0342302	0.00373132
P15311	EZR	Ezrin	129	6.02684	6.07569	5.85802	6.12337	6.24796	8.06947	5.85304	6.10041	5.79373	6.45705	6.12238	5.86562	6.14792	6.33884	6.80548	6.11419	6.02098	1.00097	1.00909	0.972935	1.01701	1.0377	1.34023	0.972108	1.01319	0.962257	1.07243	1.01684	0.974197	1.02108	1.05279	1.13029	1.01548	0.00140344	0.0130499	-0.0395852	0.0243275	0.0533869	0.422476	-0.0408122	0.0189079	-0.0555059	0.100877	0.0240943	-0.0377147	0.0301001
P52209	PGD	6-phosphogluconate dehydrogenase, decarboxylating	128	6.18441	6.30285	6.26698	6.2572	6.21573	6.6993	6.24066	6.24457	5.97356	6.29766	6.29752	6.05686	5.92671	6.31955	6.3521	6.36433	6.25286	0.989053	1.00799	1.00226	1.00069	0.994062	1.0714	0.998049	0.998674	0.955332	1.00716	1.00714	0.968654	0.94784	1.01067	1.01587	1.01783	-0.0158802	0.0114881	0.00325417	0.001001	-0.00859238	0.0994941	-0.0028176	-0.00191398	-0.0659252	0.0102997	0.0102676	-0.0459462	-0.0772847
P12956	XRCC6	X-ray repair cross-complementing protein 6	128	6.14067	6.14345	6.52653	6.10369	6.26748	5.87944	6.56896	6.36873	6.42048	6.31164	6.25028	6.20208	6.13558	6.37129	6.09921	6.21047	6.22858	0.985885	0.986332	1.04784	0.979948	1.00624	0.943945	1.05465	1.0225	1.03081	1.01333	1.00348	0.995745	0.985068	1.02291	0.979229	0.997092	-0.0205084	-0.0198554	0.0674117	-0.0292228	0.00898104	-0.0832257	0.0767605	0.0321013	0.0437767	0.0191105	0.00501637	-0.00615232	-0.0217047
P05023	ATP1A1	Sodium/potassium-transporting ATPase subunit alpha-1	127	6.11145	6.05239	6.11219	6.18634	6.33256	6.34836	6.22466	6.29847	6.49659	6.29163	6.26662	6.15347	6.22846	6.51383	6.48118	5.9018	6.11559	0.999323	0.989665	0.999444	1.01157	1.03548	1.03806	1.01783	1.0299	1.0623	1.02879	1.0247	1.00619	1.01846	1.06512	1.05978	0.965041	-0.000977565	-0.0149873	-0.000802888	0.0165938	0.0502966	0.0538917	0.0255028	0.0425091	0.0871904	0.0409416	0.0351952	0.00890791	0.0263832
P27708	CAD	CAD protein	127	6.35568	6.08517	6.39762	6.28674	6.29224	5.91517	6.21396	6.29577	6.47065	6.18995	6.15902	6.30684	6.57719	6.15339	6.04832	6.25229	6.2813	1.01184	0.968775	1.01852	1.00087	1.00174	0.941711	0.989279	1.0023	1.03014	0.985456	0.980532	1.00407	1.04711	0.979636	0.962909	0.995381	0.0169827	-0.0457662	0.0264716	0.00124835	0.00250995	-0.0866441	-0.0155508	0.00331909	0.0428469	-0.021136	-0.0283629	0.00585358	0.0664076
Q13428-4	TCOF1	Isoform 4 of Treacle protein	126	6.05027	6.08636	6.22892	6.20048	6.12322	6.14919	6.44017	6.21463	6.25844	6.4936	6.33801	6.34274	6.01678	6.56751	6.26929	6.22039	6.14151	0.985144	0.991021	1.01423	1.0096	0.997022	1.00125	1.04863	1.01191	1.01904	1.05733	1.032	1.03277	0.979691	1.06936	1.02081	1.01284	-0.0215933	-0.0130132	0.0203892	0.0137871	-0.00430231	0.00180356	0.0685059	0.0170757	0.0272103	0.0804257	0.0454371	0.0465134	-0.0296012
Q99832	CCT7	T-complex protein 1 subunit eta	126	6.06554	6.01283	6.02818	6.45739	6.17803	7.25953	6.1264	6.21801	6.17736	6.30609	6.07435	5.9342	6.15876	6.39513	6.56886	6.03934	6.14098	0.987715	0.979131	0.981631	1.05152	1.00603	1.18214	0.997625	1.01254	1.00592	1.02689	0.989149	0.966327	1.00289	1.04139	1.06968	0.983448	-0.017834	-0.0304259	-0.0267476	0.0724811	0.0086768	0.241406	-0.00343051	0.0179829	0.00852033	0.0382757	-0.01574	-0.0494165	0.00416983
P27824-2	CANX	Isoform 2 of Calnexin	125	6.31403	6.22171	6.52954	6.0291	6.20663	5.65205	6.56503	6.28598	6.39916	6.40358	6.33365	6.41331	5.98857	6.52025	5.92561	6.21181	6.2736	1.00645	0.99173	1.0408	0.961028	0.989326	0.900927	1.04645	1.00197	1.02001	1.02072	1.00957	1.02227	0.954568	1.03932	0.944532	0.990152	0.00926872	-0.0119812	0.057689	-0.0573497	-0.0154823	-0.150518	0.0655092	0.00284528	0.0285901	0.0295863	0.0137447	0.0317767	-0.0670809
P06748	NPM1	Nucleophosmin	125	5.89857	6.2471	5.90693	6.66435	6.12854	7.46358	5.80468	6.00706	5.76387	6.26343	6.19459	5.90298	6.14427	6.39346	7.12028	6.09632	6.17924	0.954579	1.01098	0.955932	1.07851	0.991796	1.20785	0.939385	0.972136	0.93278	1.01363	1.00248	0.955293	0.994341	1.03467	1.15229	0.986581	-0.0670636	0.0157578	-0.0650203	0.109035	-0.0118854	0.272439	-0.0902123	-0.0407698	-0.100391	0.0195241	0.00357997	-0.0659854	-0.00818721
Q9BUF5	TUBB6	Tubulin beta-6 chain	124	6.06014	5.97282	6.23932	6.33987	6.43557	6.04022	6.1669	6.22784	6.45531	6.37088	6.33738	6.33383	6.66843	6.14446	6.01213	6.19487	6.15304	0.984902	0.970711	1.01402	1.03036	1.04592	0.981665	1.00225	1.01216	1.04913	1.0354	1.02996	1.02938	1.08376	0.998606	0.9771	1.0068	-0.0219477	-0.0428865	0.02009	0.0431545	0.0647691	-0.0266977	0.00324667	0.0174331	0.0691876	0.0501939	0.0425877	0.0417794	0.116048
Q01105-2	SET	Isoform 2 of Protein SET	124	6.0227	5.90595	6.45967	6.39961	6.17034	6.28646	6.4391	6.35156	6.08033	6.34409	6.41763	6.28804	6.202	6.45389	6.15693	6.02171	6.19698	0.971876	0.953036	1.04239	1.0327	0.995701	1.01444	1.03907	1.02494	0.981176	1.02374	1.03561	1.01469	1.00081	1.04146	0.993537	0.971716	-0.0411555	-0.0693968	0.0598946	0.0464181	-0.00621591	0.0206819	0.0552932	0.0355451	-0.0274163	0.0338473	0.0504747	0.0210445	0.00116763
P13667	PDIA4	Protein disulfide-isomerase A4	123	6.12819	6.16387	6.17283	6.76697	6.16606	6.32166	6.12961	6.24956	5.99959	6.23228	6.26841	6.02636	6.32936	6.23066	6.52054	6.29405	6.30797	0.9715	0.977157	0.978577	1.07277	0.977504	1.00217	0.971725	0.990741	0.951113	0.988002	0.993729	0.955357	1.00339	0.987745	1.0337	0.997794	-0.0417136	-0.0333382	-0.0312426	0.101335	-0.0328257	0.00312879	-0.0413794	-0.01342	-0.0723107	-0.0174146	-0.00907511	-0.0658878	0.00488497
P29401-2	TKT	Isoform 2 of Transketolase	122	6.27363	6.38919	6.09144	6.10544	6.30024	6.61342	6.33368	6.45291	6.10972	6.14907	6.11654	6.29125	6.15365	6.28547	6.15091	6.18345	6.21493	1.00945	1.02804	0.980131	0.982384	1.01373	1.06412	1.01911	1.03829	0.983072	0.989404	0.98417	1.01228	0.990141	1.01135	0.9897	0.994936	0.0135635	0.0398961	-0.0289537	-0.0256417	0.0196698	0.0896595	0.027307	0.0542129	-0.0246307	-0.0153688	-0.0230212	0.0176097	-0.0142946
O00410-3	IPO5	Isoform 3 of Importin-5	122	6.49873	6.09334	6.36423	6.21903	6.55262	5.70279	6.24097	6.36756	6.46111	5.94817	6.32881	6.45543	6.5865	5.92885	5.95959	6.29229	6.29383	1.03256	0.968145	1.01119	0.988115	1.04112	0.906092	0.991601	1.01171	1.02658	0.945079	1.00556	1.02568	1.0465	0.942009	0.946894	0.999755	0.046219	-0.0467055	0.0160472	-0.0172492	0.0581331	-0.142271	-0.0121685	0.0168019	0.0378433	-0.0814929	0.00799547	0.0365744	0.0655733
Q9Y230	RUVBL2	RuvB-like 2	119	6.24605	6.23529	6.28395	6.02172	6.3487	6.112	6.40871	6.25899	6.3225	6.34458	6.25252	6.28375	6.2321	6.41633	6.10197	6.13085	6.19675	1.00796	1.00622	1.01407	0.971754	1.02452	0.986323	1.0342	1.01004	1.02029	1.02386	1.009	1.01404	1.0057	1.03543	0.984704	0.989365	0.0114318	0.00894431	0.0201594	-0.0413367	0.0349489	-0.0198678	0.0485216	0.0144175	0.0289828	0.0340123	0.0129254	0.0201134	0.00820604
P10599	TXN	Thioredoxin	119	6.27949	6.21382	5.89176	6.56092	6.34951	6.67266	6.12739	5.97099	6.06283	6.21654	6.64098	6.23136	5.6166	6.33762	6.44836	6.37916	6.2365	1.00689	0.996364	0.944723	1.05202	1.01812	1.06994	0.982505	0.957427	0.972153	0.9968	1.06486	0.999176	0.900602	1.01621	1.03397	1.02288	0.00991137	-0.00525557	-0.0820374	0.0731621	0.0259092	0.097526	-0.0254633	-0.0627659	-0.0407446	-0.00462419	0.0906601	-0.00118895	-0.151039
P23396	RPS3	40S ribosomal protein S3	118	6.37858	6.29862	6.17431	6.14544	6.27941	6.84386	6.18828	6.22213	6.03885	6.26287	6.18426	5.91203	6.3124	6.10884	6.42578	6.22433	6.24924	1.0207	1.0079	0.98801	0.98339	1.00483	1.09515	0.990246	0.995662	0.966334	1.00218	0.989602	0.94604	1.01011	0.977534	1.02825	0.996014	0.0295551	0.0113556	-0.0174023	-0.0241639	0.00694884	0.13113	-0.0141417	-0.00627163	-0.0494063	0.00314376	-0.0150792	-0.0800266	0.0145085
P30041	PRDX6	Peroxiredoxin-6	118	6.50099	6.36268	6.00511	6.16486	6.39355	6.43386	6.04035	6.12804	6.04843	6.13776	6.29368	6.22584	6.40571	6.32751	6.21637	6.31527	6.25841	1.03876	1.01666	0.959526	0.985052	1.02159	1.02803	0.965157	0.979169	0.966448	0.980722	1.00564	0.994796	1.02354	1.01104	0.993283	1.00909	0.0548633	0.0238384	-0.0596055	-0.021728	0.030821	0.0398884	-0.051164	-0.0303705	-0.0492355	-0.0280839	0.00810765	-0.00752767	0.0335623
P55786	NPEPPS	Puromycin-sensitive aminopeptidase	117	6.29655	6.35119	6.21664	6.28288	6.26915	6.05655	6.31832	6.2398	6.21295	6.22132	6.19948	6.23815	6.15001	6.34885	6.13927	6.45891	6.28681	1.00155	1.01024	0.988838	0.999374	0.99719	0.963373	1.00501	0.992522	0.988251	0.989582	0.986108	0.992259	0.978239	1.00987	0.976531	1.02737	0.00223225	0.0146976	-0.0161943	-0.000903284	-0.00405946	-0.0538331	0.0072117	-0.0108295	-0.0170509	-0.0151086	-0.0201821	-0.0112111	-0.0317406
P02786	TFRC	Transferrin receptor protein 1	116	6.27675	6.16456	6.24214	6.21614	6.31918	6.30794	6.26489	6.28806	6.14177	6.1887	6.23505	6.35733	6.41918	6.11482	6.15241	6.31108	6.2249	1.00833	0.990307	1.00277	0.998593	1.01515	1.01334	1.00642	1.01015	0.986646	0.994185	1.00163	1.02127	1.03121	0.982317	0.988355	1.01384	0.0119677	-0.0140522	0.00399063	-0.00203109	0.0216873	0.0191189	0.0092391	0.0145649	-0.0193956	-0.00841369	0.00235105	0.0303709	0.0443389
Q04637-9	EIF4G1	Isoform 9 of Eukaryotic translation initiation factor 4 gamma 1	116	6.12798	6.26018	6.00057	6.27686	6.25607	7.54958	5.73721	6.13864	5.83788	6.46213	6.15991	5.89191	6.20776	6.05813	6.86389	6.17131	6.1664	0.99377	1.01521	0.973108	1.01791	1.01454	1.22431	0.930399	0.995499	0.946725	1.04796	0.998948	0.955487	1.00671	0.982442	1.11311	1.0008	-0.0090163	0.0217762	-0.0393283	0.0256151	0.0208288	0.291968	-0.104079	-0.00650883	-0.0789833	0.0675819	-0.00151862	-0.0656925	0.00964489
Q9Y4L1	HYOU1	Hypoxia up-regulated protein 1	116	6.10699	6.07622	6.18154	6.31518	6.25726	7.20356	6.22522	6.10525	6.19923	6.32253	6.06472	6.00856	6.14927	6.27927	6.32502	6.18019	6.16998	0.98979	0.984803	1.00187	1.02353	1.01415	1.16752	1.00895	0.989508	1.00474	1.02472	0.98294	0.973837	0.996643	1.01771	1.02513	1.00165	-0.0148049	-0.0220923	0.0026999	0.0335575	0.0202647	0.223444	0.0128584	-0.015216	0.00682263	0.0352356	-0.0248254	-0.0382471	-0.00485124
P62826	RAN	GTP-binding nuclear protein Ran	116	6.13146	6.17607	5.84002	6.43365	6.13242	7.39785	5.9819	6.12916	5.84517	6.29552	6.30548	6.05919	6.07342	6.14115	6.69184	6.3657	6.1453	0.997748	1.00501	0.950323	1.04692	0.997904	1.20382	0.973411	0.997374	0.951161	1.02444	1.02607	0.985988	0.988303	0.999325	1.08894	1.03586	-0.0032528	0.00720566	-0.0735101	0.066154	-0.00302693	0.267623	-0.0388796	-0.00379408	-0.0722385	0.0348421	0.0371228	-0.0203585	-0.0169743
P46109	CRKL	Crk-like protein	115	6.2087	6.17433	6.18259	6.25264	6.26103	6.30758	6.35846	6.16333	6.44815	6.2631	6.27008	6.3742	6.10019	6.36742	6.14689	6.12132	6.20457	1.00067	0.995127	0.996458	1.00775	1.0091	1.0166	1.0248	0.993354	1.03926	1.00943	1.01056	1.02734	0.983178	1.02625	0.990704	0.986583	0.000961156	-0.00704747	-0.00511873	0.0111354	0.0130699	0.0237565	0.0353473	-0.00962003	0.0555552	0.0135468	0.0151538	0.0389142	-0.0244759
P00491	PNP	Purine nucleoside phosphorylase	114	6.43562	6.32831	6.30037	6.28418	6.47509	6.14869	6.1537	6.30574	6.06182	6.11987	6.33833	6.33489	6.19358	5.9259	6.19226	6.40164	6.33712	1.01554	0.99861	0.994201	0.991646	1.02177	0.970266	0.971056	0.995048	0.956558	0.965718	1.00019	0.999648	0.977349	0.935109	0.977141	1.01018	0.0222518	-0.00200706	-0.00839078	-0.0121028	0.0310729	-0.0435483	-0.0423732	-0.00716165	-0.0640763	-0.0503263	0.00027544	-0.000507766	-0.0330538
P46777	RPL5	60S ribosomal protein L5	113	6.20639	6.05877	6.53645	6.25796	6.24295	5.90826	6.55996	6.21939	6.48229	6.2984	6.31675	6.27885	5.78332	6.44064	6.18934	6.22029	6.26489	0.990662	0.967099	1.04335	0.998893	0.996498	0.943074	1.0471	0.992737	1.0347	1.00535	1.00828	1.00223	0.923132	1.02805	0.98794	0.992881	-0.0135354	-0.0482648	0.0612176	-0.00159732	-0.00506184	-0.0845564	0.0663973	-0.0105167	0.0492138	0.00769563	0.0118927	0.00321059	-0.115392
P06744-2	GPI	Isoform 2 of Glucose-6-phosphate isomerase	113	6.21257	6.07168	6.19765	6.57146	6.31067	5.85846	6.28272	6.31947	6.26779	6.16841	6.33489	6.2793	6.25105	6.12729	6.27822	6.46837	6.26334	0.991894	0.9694	0.989512	1.04919	1.00756	0.935357	1.00309	1.00896	1.00071	0.984844	1.01142	1.00255	0.998038	0.978278	1.00238	1.03273	-0.011742	-0.0448364	-0.0152109	0.0692817	0.010861	-0.0964107	0.00445709	0.0128714	0.00102465	-0.0220335	0.0163874	0.00367154	-0.00283365
Q14008	CKAP5	Cytoskeleton-associated protein 5	112	6.15159	6.13276	6.35617	6.29622	6.24339	6.04287	6.22173	6.37661	6.32276	6.32893	6.39012	6.31948	6.00927	6.1915	6.36059	6.25602	6.23419	0.986751	0.983731	1.01957	1.00995	1.00148	0.969312	0.998002	1.02285	1.01421	1.0152	1.02501	1.01368	0.963922	0.993153	1.02028	1.0035	-0.0192416	-0.0236645	0.0279567	0.014285	0.00212862	-0.0449671	-0.00288518	0.0325887	0.0203535	0.0217606	0.0356421	0.0196049	-0.0530112
P07814	EPRS	Bifunctional glutamate/proline--tRNA ligase	112	6.2186	6.07675	6.26535	6.32847	6.31294	5.95627	6.24653	6.27268	6.57388	6.27563	6.35395	6.19781	6.07338	6.3885	6.1492	6.31006	6.22229	0.999407	0.97661	1.00692	1.01706	1.01457	0.957247	1.0039	1.0081	1.0565	1.00857	1.02116	0.996065	0.976068	1.02671	0.988253	1.01411	-0.000856394	-0.0341463	0.00994889	0.0244105	0.0208658	-0.0630371	0.00560877	0.0116358	0.0792989	0.0123141	0.0302075	-0.00568769	-0.0349466
Q16658	FSCN1	Fascin	112	6.18316	6.23664	6.16307	6.17047	6.21923	6.48226	6.21234	6.24139	6.14661	6.31651	6.28721	6.20143	6.14591	6.41027	6.24797	6.33553	6.18834	0.999164	1.00781	0.995917	0.997113	1.00499	1.0475	1.00388	1.00857	0.993257	1.02071	1.01598	1.00212	0.993144	1.03586	1.00964	1.02379	-0.00120696	0.0112177	-0.00590212	-0.00417092	0.00718467	0.0669456	0.00558549	0.0123161	-0.00976035	0.0295764	0.0228687	0.00304963	-0.00992466
Q00610	CLTC	Clathrin heavy chain 1	111	6.12472	5.92827	6.30247	6.452	6.4214	7.28235	6.00901	6.13981	6.32834	6.26283	6.09841	6.22064	6.10298	5.93736	6.17548	6.21392	6.20186	0.987561	0.955885	1.01622	1.04033	1.0354	1.17422	0.968904	0.989994	1.02039	1.00983	0.983319	1.00303	0.984056	0.957351	0.995746	1.00194	-0.0180582	-0.065091	0.0232152	0.0570443	0.0501857	0.231702	-0.0455748	-0.0145081	0.029125	0.0141126	-0.024269	0.0043609	-0.0231883
P08243	ASNS	Asparagine synthetase [glutamine-hydrolyzing]	111	6.15581	6.07591	6.34054	6.28491	6.40626	6.05933	6.18976	6.27046	6.36547	6.24961	6.20927	6.2727	6.50987	6.06166	6.22345	6.32499	6.21429	0.990589	0.977732	1.02032	1.01136	1.03089	0.975064	0.996052	1.00904	1.02433	1.00568	0.999192	1.0094	1.04756	0.975438	1.00147	1.01781	-0.0136414	-0.0324896	0.0290156	0.0163019	0.0438922	-0.0364319	-0.00570668	0.0129811	0.0346769	0.00817601	-0.00116648	0.0134964	0.0670386
P54577	YARS	Tyrosine--tRNA ligase, cytoplasmic	111	6.22895	6.17037	6.15941	6.47632	6.31122	6.16754	6.2247	6.36309	6.09267	6.19165	6.28103	6.13827	6.31835	6.17528	6.35213	6.34903	6.25876	0.995237	0.985877	0.984126	1.03476	1.00838	0.985425	0.994558	1.01667	0.973462	0.989277	1.00356	0.980748	1.00952	0.986662	1.01492	1.01442	-0.00688844	-0.0205204	-0.0230853	0.0492968	0.0120415	-0.0211823	-0.00787312	0.0238501	-0.0388028	-0.0155535	0.00512373	-0.0280453	0.0136704
P51858	HDGF	Hepatoma-derived growth factor	111	6.04552	6.10552	6.12034	6.0522	6.2754	6.62136	6.36451	6.28077	6.23612	6.53103	6.32052	6.25145	5.67144	6.61604	6.34806	6.15973	6.08089	0.994183	1.00405	1.00649	0.995281	1.03199	1.08888	1.04664	1.03287	1.02553	1.07402	1.03941	1.02805	0.932665	1.088	1.04394	1.01296	-0.00841724	0.00583049	0.00932812	-0.00682402	0.0454237	0.122844	0.0657658	0.0466578	0.036365	0.103027	0.0557596	0.0399072	-0.100569
P54578	USP14	Ubiquitin carboxyl-terminal hydrolase 14	110	6.1649	6.44304	6.19786	6.10425	6.2689	6.1709	6.25984	6.30877	6.30524	6.31128	6.12005	6.22824	6.26947	6.3006	6.24716	6.2995	6.22751	0.989946	1.03461	0.995238	0.980207	1.00665	0.990909	1.00519	1.01305	1.01248	1.01345	0.982744	1.00012	1.00674	1.01174	1.00315	1.01156	-0.0145785	0.0490855	-0.00688585	-0.028842	0.0095563	-0.0131751	0.00746977	0.0187027	0.0178953	0.0192766	-0.0251126	0.000168526	0.00968748
Q9HB71	CACYBP	Calcyclin-binding protein	110	6.36603	6.2818	6.22453	6.71953	6.31693	5.92705	6.40133	6.52255	5.71462	6.09189	6.24233	6.00903	5.82014	6.10767	6.54349	6.71108	6.39797	0.995007	0.981842	0.972891	1.05026	0.987333	0.926395	1.00052	1.01947	0.893192	0.952159	0.975673	0.939208	0.909685	0.954626	1.02274	1.04894	-0.00722084	-0.0264368	-0.0396499	0.0707455	-0.0183912	-0.110301	0.000756893	0.0278213	-0.162957	-0.0707249	-0.0355302	-0.0904827	-0.136561
O60610	DIAPH1	Protein diaphanous homolog 1	110	6.25974	6.27965	6.36527	6.11341	6.26027	6.3239	6.3192	6.27166	6.16049	6.27421	6.19524	6.19612	6.07287	6.24698	6.37111	6.2899	6.25452	1.00083	1.00402	1.01771	0.977439	1.00092	1.01109	1.01034	1.00274	0.984966	1.00315	0.990522	0.990663	0.970957	0.998795	1.01864	1.00566	0.00120414	0.00578556	0.0253231	-0.0329213	0.00132629	0.015916	0.0148433	0.00394876	-0.0218535	0.00453522	-0.0137384	-0.0135335	-0.0425201
P23526	AHCY	Adenosylhomocysteinase	110	6.30234	6.14729	6.19883	6.3599	6.32308	6.23776	6.22932	6.20359	6.2612	6.17253	6.26973	6.26722	6.52541	6.15949	6.11445	6.22785	6.25209	1.00804	0.983238	0.991481	1.01724	1.01135	0.997708	0.996358	0.992243	1.00146	0.987275	1.00282	1.00242	1.04372	0.985189	0.977985	0.996123	0.011549	-0.024388	-0.0123426	0.0246655	0.0162889	-0.0033105	-0.00526386	-0.0112352	0.00210064	-0.0184766	0.00406477	0.00348709	0.06173
Q9Y266	NUDC	Nuclear migration protein nudC	110	6.1421	6.27073	6.10497	6.50639	6.2837	6.46127	6.09157	6.43604	6.02962	6.21162	6.15185	6.06287	6.13883	6.34612	6.41277	6.34954	6.25605	0.981786	1.00235	0.975851	1.04002	1.00442	1.0328	0.973709	1.02877	0.963807	0.992898	0.983345	0.969121	0.981263	1.0144	1.02505	1.01494	-0.0265195	0.00338194	-0.0352673	0.0566058	0.00636284	0.0465663	-0.0384374	0.0409218	-0.0531844	-0.0102819	-0.0242311	-0.0452506	-0.0272877
P22102	GART	Trifunctional purine biosynthetic protein adenosine-3	108	6.17761	6.13222	6.11971	6.42907	6.21621	7.4443	5.98969	6.08156	6.05789	6.3199	6.09009	6.06386	6.37082	6.01	6.31258	6.18447	6.21465	0.994039	0.986736	0.984723	1.0345	1.00025	1.19786	0.963801	0.978584	0.974775	1.01694	0.979957	0.975736	1.02513	0.967069	1.01576	0.995143	-0.00862493	-0.0192643	-0.0222104	0.0489363	0.000361519	0.260462	-0.0531924	-0.0312323	-0.0368583	0.024228	-0.0292102	-0.0354373	0.0358054
P12814-3	ACTN1	Isoform 3 of Alpha-actinin-1	108	6.21941	6.35564	6.20745	6.43024	6.13857	6.31674	6.25172	6.27791	6.29503	6.35267	6.04824	6.12421	6.28122	6.24162	6.341	6.11831	6.30319	0.986709	1.00832	0.984812	1.02016	0.973884	1.00215	0.991835	0.99599	0.998706	1.00785	0.959553	0.971606	0.996515	0.990233	1.006	0.97067	-0.0193033	0.0119564	-0.0220803	0.0287916	-0.0381784	0.00309918	-0.0118278	-0.00579666	-0.00186775	0.0112821	-0.0595656	-0.0415573	-0.00503621
P50851	LRBA	Lipopolysaccharide-responsive and beige-like anchor protein	107	6.24579	6.17501	6.3922	6.20636	6.26264	6.43036	6.32331	6.21278	6.25868	6.23139	6.18848	6.23472	6.20817	6.20143	6.18198	6.2467	6.25484	0.998553	0.987237	1.02196	0.992249	1.00125	1.02806	1.01095	0.993276	1.00061	0.996251	0.989391	0.996783	0.992539	0.991461	0.988351	0.998699	-0.00208892	-0.0185315	0.0313396	-0.0112256	0.00179797	0.0399265	0.015707	-0.00973401	0.000885434	-0.00541897	-0.0153879	-0.00464821	-0.0108049
P55884-2	EIF3B	Isoform 2 of Eukaryotic translation initiation factor 3 subunit B	106	6.38683	6.18747	6.34192	6.41174	6.28914	5.94855	6.33541	6.40397	6.12854	6.12076	6.29619	6.18978	6.23774	6.11765	6.14137	6.46295	6.33199	1.00866	0.977176	1.00157	1.01259	0.993233	0.939444	1.00054	1.01137	0.96787	0.966641	0.994346	0.977541	0.985115	0.96615	0.969896	1.02068	0.0124411	-0.0333094	0.0022607	0.0180569	-0.00979623	-0.0901209	0.00077901	0.0163076	-0.0471156	-0.0489482	-0.0081799	-0.0327708	-0.0216356
Q15181	PPA1	Inorganic pyrophosphatase	106	6.18411	6.23063	6.18793	6.01228	6.1403	6.60883	6.33374	6.03073	6.47128	6.3493	6.13732	6.29734	6.53672	6.37699	6.04629	6.0562	6.15374	1.00494	1.0125	1.00556	0.977013	0.997816	1.07395	1.02925	0.980011	1.0516	1.03178	0.997332	1.02334	1.06224	1.03628	0.982539	0.98415	0.00710308	0.0179151	0.00799397	-0.0335507	-0.00315376	0.102932	0.0415947	-0.0291303	0.0725882	0.0451346	-0.0038541	0.0332797	0.087104
Q99623	PHB2	Prohibitin-2	106	6.39062	6.28268	6.12808	6.17983	6.23233	6.13225	6.36932	6.33448	6.12009	6.23389	6.36932	6.18097	6.40741	6.16883	6.23362	6.23629	6.2453	1.02327	1.00598	0.98123	0.989517	0.997923	0.981898	1.01986	1.01428	0.979951	0.998173	1.01986	0.989699	1.02596	0.987755	0.998129	0.998557	0.0331845	0.00860865	-0.0273363	-0.0152043	-0.00299983	-0.0263549	0.0283679	0.0204547	-0.0292186	-0.00263875	0.0283679	-0.0149382	0.0369699
O60841	EIF5B	Eukaryotic translation initiation factor 5B	106	6.30179	6.1517	6.32131	6.22087	6.27011	5.97367	6.45953	6.32274	6.31054	6.34926	6.2641	6.23319	6.06475	6.25824	6.20697	6.29123	6.24892	1.00846	0.984443	1.01158	0.995512	1.00339	0.955953	1.0337	1.01181	1.00986	1.01606	1.00243	0.997483	0.970528	1.00149	0.993287	1.00677	0.0121554	-0.0226211	0.0166173	-0.00648994	0.00488446	-0.0649888	0.0478229	0.0169436	0.0141572	0.0229822	0.00350095	-0.0036356	-0.0431581
P09651	HNRNPA1	Heterogeneous nuclear ribonucleoprotein A1	106	6.17843	6.00997	6.28632	6.14168	6.11596	6.4098	6.32072	6.27502	6.27777	6.36869	6.23872	6.32377	6.52637	6.34385	6.04913	6.1338	6.1541	1.00395	0.97658	1.02148	0.997982	0.993803	1.04155	1.02707	1.01965	1.0201	1.03487	1.01375	1.02757	1.06049	1.03083	0.982943	0.996701	0.00569239	-0.0341901	0.0306678	-0.00291454	-0.00896892	0.0587315	0.038541	0.0280722	0.0287043	0.0494488	0.0197022	0.039237	0.0847329
Q9Y617	PSAT1	Phosphoserine aminotransferase	106	6.30198	6.18122	6.20017	6.08866	6.38846	6.32716	6.24154	6.19701	6.46044	6.33118	6.28234	6.27538	6.10575	6.27539	6.18376	6.15954	6.19301	1.0176	0.998097	1.00116	0.983151	1.03156	1.02166	1.00784	1.00065	1.04318	1.02231	1.01442	1.0133	0.98591	1.0133	0.998507	0.994596	0.025165	-0.00274858	0.00166758	-0.0245154	0.044828	0.0309179	0.0112618	0.000932103	0.0609922	0.0318342	0.0206618	0.0190626	-0.0204717
P02008	HBZ	Hemoglobin subunit zeta	106	6.03461	6.15822	6.63997	6.19551	6.66471	5.99567	6.03805	6.6077	6.33196	6.25992	6.05464	6.16761	6.55433	6.36444	5.89641	6.03627	6.25708	0.964445	0.984201	1.06119	0.99016	1.06515	0.958222	0.964995	1.05604	1.01197	1.00045	0.967647	0.985701	1.04751	1.01716	0.942358	0.964711	-0.0522284	-0.0229756	0.0856878	-0.0142659	0.0910531	-0.061568	-0.0514063	0.0786592	0.0171632	0.000655247	-0.0474478	-0.0207774	0.0669593
P55060	CSE1L	Exportin-2	105	6.23204	6.09356	6.21377	6.17017	6.39386	6.32757	6.24935	6.36807	6.37587	6.21387	6.22498	6.31824	6.32459	6.13382	6.14768	6.21257	6.17738	1.00885	0.98643	1.00589	0.998832	1.03504	1.02431	1.01165	1.03087	1.03213	1.00591	1.0077	1.0228	1.02383	0.992948	0.995191	1.0057	0.0127082	-0.0197109	0.00847259	-0.00168601	0.0496909	0.0346553	0.0167099	0.0438599	0.045626	0.00849581	0.011073	0.0325265	0.0339757
Q13885	TUBB2A	Tubulin beta-2A chain	105	6.06375	6.07958	6.30494	6.54746	6.23162	5.89224	6.24317	6.35986	6.3048	6.16694	6.30232	6.24753	5.99775	6.18998	6.69493	6.37313	6.24893	0.970366	0.972899	1.00896	1.04777	0.99723	0.942919	0.999078	1.01775	1.00894	0.986879	1.00854	0.999776	0.959804	0.990566	1.07137	1.01987	-0.0433995	-0.0396381	0.0128729	0.0673256	-0.00400249	-0.0847936	-0.00133101	0.0253853	0.0128408	-0.0190549	0.0122733	-0.000323832	-0.0591884
Q9Y520-7	PRRC2C	Isoform 7 of Protein PRRC2C	105	6.17676	6.05228	6.39042	6.14872	6.20576	5.90774	6.43799	6.08566	6.52539	6.41571	6.23913	6.43793	6.23276	6.47855	6.14157	6.12363	6.19205	0.997532	0.977428	1.03204	0.993003	1.00221	0.954085	1.03972	0.982819	1.05383	1.03612	1.0076	1.03971	1.00658	1.04627	0.991848	0.988951	-0.00356568	-0.0329372	0.0454948	-0.0101298	0.00319195	-0.0678096	0.0561944	-0.0250022	0.0756482	0.051193	0.0109289	0.0561809	0.0094552
P45880	VDAC2	Voltage-dependent anion-selective channel protein 2	105	6.21536	6.03798	6.30027	6.17917	6.41368	6.0473	6.36248	6.35052	6.418	6.34244	6.20651	6.25698	6.36622	6.29716	5.9491	6.25681	6.1832	1.0052	0.976515	1.01893	0.999349	1.03728	0.978022	1.029	1.02706	1.03797	1.02575	1.00377	1.01193	1.0296	1.01843	0.96214	1.01191	0.00748545	-0.0342865	0.0270612	-0.00093944	0.0527999	-0.0320614	0.0412367	0.0385222	0.0537713	0.0366855	0.00542975	0.017114	0.0420845
Q15366-3	PCBP2	Isoform 3 of Poly(rC)-binding protein 2	104	6.46911	6.51626	6.29751	6.48602	6.48043	5.38707	6.01551	6.4306	5.83436	6.01204	6.44532	6.17592	6.5877	6.0798	6.33038	6.45198	6.44222	1.00417	1.01149	0.977536	1.0068	1.00593	0.836213	0.933763	0.998195	0.905644	0.933224	1.00048	0.958663	1.02258	0.943742	0.982639	1.00151	0.0060082	0.0164851	-0.0327775	0.00977442	0.0085305	-0.258058	-0.098872	-0.0026057	-0.142985	-0.0997044	0.000692939	-0.060905	0.0322158
P09211	GSTP1	Glutathione S-transferase P	104	6.44432	6.10107	6.44837	6.53528	6.21919	5.62757	6.29754	6.33021	6.46325	6.09294	6.20892	6.3325	6.34934	6.0836	5.98186	6.48402	6.38226	1.00972	0.955942	1.01036	1.02398	0.974449	0.881752	0.986726	0.991845	1.01269	0.954668	0.97284	0.992203	0.994842	0.953205	0.937264	1.01594	0.0139608	-0.0650051	0.0148671	0.0341817	-0.0373407	-0.181555	-0.019279	-0.011814	0.0181924	-0.0669288	-0.039725	-0.0112922	-0.00746075
P51610-4	HCFC1	Isoform 4 of Host cell factor 1	103	6.23718	6.18476	6.28545	6.29845	6.28119	5.95999	6.2596	6.19488	6.34619	6.30061	6.23829	6.17914	6.54984	6.25552	6.22579	6.20311	6.25146	0.997716	0.98933	1.00544	1.00752	1.00476	0.953376	1.0013	0.990949	1.01515	1.00786	0.997893	0.988432	1.04773	1.00065	0.995894	0.992266	-0.00329927	-0.0154756	0.00782287	0.0108037	0.00684475	-0.0688833	0.00187731	-0.0131168	0.0216976	0.0112983	-0.00304254	-0.0167871	0.0672665
Q13200	PSMD2	26S proteasome non-ATPase regulatory subunit 2	102	6.19402	6.2086	6.30701	6.23676	6.3236	6.1388	6.21141	6.43384	6.33447	6.2231	6.17	6.33654	6.23341	6.32985	6.12978	6.18883	6.2366	0.993173	0.995511	1.01129	1.00003	1.01395	0.984319	0.995961	1.03163	1.01569	0.997836	0.989322	1.01603	0.999489	1.01495	0.982872	0.992341	-0.00988311	-0.00649117	0.0161971	3.75902e-05	0.019987	-0.0228025	-0.00583835	0.0449209	0.0224648	-0.00312572	-0.0154887	0.0229361	-0.000737544
Q92598	HSPH1	Heat shock protein 105 kDa	102	6.33749	6.23459	6.15423	6.40841	6.43184	6.10289	6.21573	6.29834	6.23316	6.24629	6.21242	6.10933	5.92522	6.26345	6.43595	6.39067	6.28368	1.00856	0.992188	0.979399	1.01985	1.02358	0.971229	0.989186	1.00233	0.99196	0.99405	0.98866	0.972254	0.942954	0.996781	1.02423	1.01703	0.0123019	-0.011315	-0.0300314	0.0283567	0.0336218	-0.0421171	-0.0156859	0.00336193	-0.011646	-0.00861016	-0.0164543	-0.0405955	-0.084741
P21796	VDAC1	Voltage-dependent anion-selective channel protein 1	101	5.97265	5.9203	6.35634	6.8083	6.3414	5.78551	6.36116	6.27956	6.65062	6.35652	6.24374	6.27094	6.2308	6.17247	6.20083	6.04885	6.2644	0.953428	0.945071	1.01468	1.08682	1.01229	0.923554	1.01545	1.00242	1.06165	1.01471	0.996702	1.00104	0.994637	0.985325	0.989853	0.965592	-0.0688046	-0.0815055	0.0210205	0.120119	0.0176256	-0.114732	0.0221141	0.00348771	0.0863131	0.0210614	-0.0047653	0.00150596	-0.00775835
P04083	ANXA1	Annexin A1	101	6.30929	6.17816	6.20232	6.62488	6.32021	5.90792	6.27871	6.43713	6.30045	6.19256	6.13755	6.15073	5.73122	6.32645	6.34958	6.55287	6.32866	0.996939	0.976219	0.980036	1.04681	0.998664	0.933518	0.992107	1.01714	0.995542	0.978494	0.969802	0.971885	0.905597	0.99965	1.00331	1.03543	-0.00442297	-0.0347234	-0.0290927	0.0659937	-0.00192814	-0.0992503	-0.0114325	0.024517	-0.00644576	-0.0313647	-0.0442378	-0.041143	-0.143058
Q99497	PARK7	Protein/nucleic acid deglycase DJ-1	101	6.13995	6.44434	6.02901	6.32589	6.33386	6.38467	5.96288	6.24605	6.51205	6.2139	5.99262	6.20472	6.61648	6.26335	6.38852	5.9417	6.2348	0.984787	1.03361	0.966994	1.01461	1.01589	1.02404	0.956387	1.0018	1.04447	0.996648	0.961157	0.995176	1.06122	1.00458	1.02466	0.95299	-0.0221158	0.0476899	-0.0484216	0.0209258	0.0227423	0.0342694	-0.0643334	0.00260141	0.0627691	-0.00484368	-0.0571558	-0.0069766	0.0857212
O43143	DHX15	Pre-mRNA-splicing factor ATP-dependent RNA helicase DHX15	101	6.21996	6.17546	6.15081	6.04751	6.35886	6.58365	6.19761	6.35509	6.16103	6.31462	6.18555	6.17867	6.32027	6.35262	6.22054	6.17775	6.14844	1.01163	1.0044	1.00039	0.983585	1.03422	1.07078	1.008	1.03361	1.00205	1.02703	1.00604	1.00492	1.02795	1.03321	1.01173	1.00477	0.0166861	0.00632737	0.000557173	-0.023878	0.0485489	0.0986684	0.0114927	0.0476933	0.00295232	0.0384767	0.00868264	0.00707708	0.039767
Q99460	PSMD1	26S proteasome non-ATPase regulatory subunit 1	100	6.30446	6.33856	6.17979	6.34536	6.40133	6.21654	6.1925	6.35232	6.14183	6.24089	6.209	6.08102	6.04055	6.14408	6.44073	6.37103	6.29204	1.00197	1.00739	0.98216	1.00847	1.01737	0.988	0.98418	1.00958	0.976127	0.99187	0.986802	0.966462	0.96003	0.976484	1.02363	1.01255	0.00284439	0.0106267	-0.0259706	0.0121736	0.0248433	-0.0174166	-0.0230065	0.0137552	-0.0348598	-0.0117766	-0.0191675	-0.0492151	-0.0588485
P61978-3	HNRNPK	Isoform 3 of Heterogeneous nuclear ribonucleoprotein K	100	5.93209	5.92831	6.23397	6.34794	6.09475	5.82251	6.41284	6.603	6.71064	6.33095	6.13012	6.22513	6.12851	6.62525	6.40271	6.07129	6.11058	0.97079	0.970172	1.02019	1.03884	0.99741	0.952858	1.04947	1.08059	1.0982	1.03606	1.0032	1.01875	1.00293	1.08423	1.04781	0.993571	-0.0427682	-0.0436878	0.0288425	0.0549798	-0.00374169	-0.0696675	0.0696547	0.111813	0.135142	0.0511133	0.00460658	0.0267952	0.00422763
Q15149	PLEC	Plectin	98	6.20435	6.29499	6.33343	6.20913	6.28722	6.1598	6.27149	6.26128	6.44599	6.35775	6.17442	6.22749	6.32343	6.18897	6.12153	6.13871	6.26047	0.991035	1.00551	1.01165	0.991799	1.00427	0.983919	1.00176	1.00013	1.02963	1.01554	0.986254	0.994731	1.01006	0.988578	0.977806	0.98055	-0.012992	0.00793196	0.0167149	-0.011881	0.00615012	-0.0233886	0.00253612	0.000185496	0.0421298	0.0222442	-0.0199685	-0.00762132	0.0144352
P35237	SERPINB6	Serpin B6	98	6.09401	6.09859	5.98405	6.078	6.31146	7.13775	6.10214	6.14144	6.15531	6.49045	6.27802	6.31015	5.84522	6.43893	6.31863	6.21585	6.06366	1.005	1.00576	0.986871	1.00236	1.04087	1.17714	1.00635	1.01283	1.01511	1.07038	1.03535	1.04065	0.963975	1.06189	1.04205	1.0251	0.00720241	0.00828627	-0.0190672	0.00340722	0.0577843	0.23528	0.00912582	0.0183875	0.0216421	0.0981291	0.0501202	0.0574848	-0.0529321
P11717	IGF2R	Cation-independent mannose-6-phosphate receptor	98	6.35993	6.16743	6.29667	5.99399	6.31246	5.81065	6.51689	6.21262	6.4758	6.14441	6.28844	6.39799	6.34766	6.45528	5.92008	6.29969	6.20451	1.02505	0.994025	1.01485	0.966071	1.0174	0.936521	1.05035	1.00131	1.04373	0.990314	1.01353	1.03118	1.02307	1.04042	0.954158	1.01534	0.0356948	-0.00864668	0.0212729	-0.0497994	0.0248862	-0.0946166	0.0708675	0.0018857	0.0617423	-0.0140416	0.0193861	0.0443026	0.0329087
O94788	ALDH1A2	Retinal dehydrogenase 2	97	6.43012	6.22983	6.11636	6.38831	6.29658	6.29093	6.07852	6.28264	6.08821	6.05674	6.26321	6.20648	6.2652	6.17903	6.30542	6.5224	6.29115	1.02209	0.990252	0.972216	1.01544	1.00086	0.999964	0.966201	0.998647	0.967741	0.962739	0.995558	0.986541	0.995874	0.982177	1.00227	1.03676	0.0315208	-0.0141321	-0.0406516	0.0221094	0.00124353	-5.15982e-05	-0.0496048	-0.00195399	-0.0473068	-0.0547834	-0.00642266	-0.0195496	-0.00596434
P26358-2	DNMT1	Isoform 2 of DNA (cytosine-5)-methyltransferase 1	97	6.25679	6.33985	6.21465	6.30815	6.29846	6.2258	6.17476	6.26235	6.08356	6.39641	6.23991	6.07643	6.01361	6.2325	6.45539	6.42138	6.27986	0.996326	1.00955	0.989616	1.0045	1.00296	0.991392	0.983264	0.997212	0.968741	1.01856	0.993638	0.967606	0.957603	0.992458	1.02795	1.02254	-0.00530971	0.0137163	-0.0150593	0.00648457	0.00426673	-0.0124732	-0.0243493	-0.00402825	-0.0458166	0.02653	-0.00920718	-0.0475084	-0.0625011
P61221	ABCE1	ATP-binding cassette sub-family E member 1	97	6.24424	6.09882	6.19934	6.27506	6.372	6.14528	6.30956	6.33035	6.42755	6.24317	6.24119	6.23944	6.24276	6.44853	6.12736	6.05535	6.20437	1.00643	0.982989	0.99919	1.01139	1.02702	0.990477	1.01695	1.02031	1.03597	1.00625	1.00594	1.00565	1.00619	1.03935	0.987589	0.975982	0.00924243	-0.0247534	-0.00116893	0.0163457	0.0384627	-0.0138048	0.0242558	0.0290017	0.0509854	0.00899519	0.00853757	0.00813299	0.00890044
A0A2R8Y793	ACTB	Actin, cytoplasmic 1 (Fragment)	97	5.97986	5.78019	6.27386	6.47187	6.05366	6.22723	6.44868	6.22086	6.80502	6.41424	6.0718	6.23904	6.46665	6.31565	6.2452	5.9862	6.12644	0.976073	0.943482	1.02406	1.05638	0.98812	1.01645	1.0526	1.01541	1.11076	1.04698	0.99108	1.01838	1.05553	1.03088	1.01938	0.977108	-0.0349385	-0.0839332	0.0343032	0.0791325	-0.0172425	0.0235404	0.0739537	0.0220639	0.151549	0.0662282	-0.0129259	0.0262739	0.0779684
P63241-2	EIF5A	Isoform 2 of Eukaryotic translation initiation factor 5A-1	97	6.33403	6.49612	5.96009	6.38342	6.34339	6.44672	5.94599	6.19131	5.83392	6.31882	6.36417	6.10827	6.24063	6.03593	6.52554	6.47165	6.29342	1.00645	1.03221	0.947036	1.0143	1.00794	1.02436	0.944795	0.983776	0.926988	1.00404	1.01124	0.970581	0.991613	0.959087	1.03688	1.02832	0.00928062	0.0457352	-0.078509	0.0204865	0.011411	0.0347222	-0.081926	-0.0235984	-0.109377	0.00581209	0.0161293	-0.0430792	-0.0121514
P39023	RPL3	60S ribosomal protein L3	96	6.18986	6.21577	6.14839	6.74085	6.15894	6.53388	6.04599	6.24523	5.73741	6.14594	6.20277	6.08375	6.51421	6.13064	6.44766	6.45872	6.32372	0.978832	0.98293	0.972275	1.06596	0.973943	1.03323	0.956082	0.987588	0.907284	0.971887	0.980874	0.962053	1.03012	0.969468	1.0196	1.02135	-0.0308661	-0.0248398	-0.0405642	0.0921576	-0.0380908	0.047167	-0.0647943	-0.0180182	-0.140373	-0.0411392	-0.0278603	-0.055812	0.0428173
Q14240-2	EIF4A2	Isoform 2 of Eukaryotic initiation factor 4A-II	96	6.47707	6.1911	6.31288	6.42842	6.39404	5.72705	6.33899	6.49415	6.26921	6.08746	6.27994	6.41849	6.30065	6.10075	5.90795	6.27186	6.35237	1.01963	0.974613	0.993784	1.01197	1.00656	0.901562	0.997894	1.02232	0.986909	0.958298	0.988598	1.01041	0.991859	0.96039	0.930039	0.987326	0.028047	-0.0370986	-0.00899605	0.0171698	0.00943339	-0.149502	-0.00304139	0.0318463	-0.0190107	-0.061454	-0.0165436	0.0149396	-0.0117937
P11413-2	G6PD	Isoform Long of Glucose-6-phosphate 1-dehydrogenase	96	6.12239	6.0665	6.21037	5.95485	6.42033	6.47342	6.08999	6.28249	6.44251	6.33945	6.17431	6.25745	6.69741	6.26965	6.26212	5.93677	6.08853	1.00556	0.996382	1.02001	0.978044	1.0545	1.06322	1.00024	1.03186	1.05814	1.04121	1.01409	1.02774	1.1	1.02975	1.02851	0.975075	0.00800159	-0.00522895	0.0285859	-0.0320282	0.0765541	0.0884348	0.000346502	0.0452431	0.0815295	0.0582643	0.0201846	0.0394815	0.13751
P18621-3	RPL17	Isoform 3 of 60S ribosomal protein L17	95	5.8663	6.13101	6.26157	6.81961	6.09764	6.06402	6.13119	6.00345	7.15331	6.3339	6.08043	5.91736	5.71603	6.5717	6.84907	6.0034	6.26962	0.93567	0.977891	0.998716	1.08772	0.972569	0.967207	0.97792	0.957546	1.14095	1.01025	0.969824	0.943814	0.911702	1.04818	1.09242	0.957538	-0.0959277	-0.0322538	-0.00185414	0.121311	-0.0401276	-0.0481041	-0.0322115	-0.0625868	0.190232	0.0147155	-0.0442052	-0.0834249	-0.133365
P61981	YWHAG	14-3-3 protein gamma	95	6.1467	6.20554	6.04576	6.27091	6.37806	6.74143	6.00628	6.15372	6.18456	6.50404	6.30584	5.92016	5.88637	6.13217	6.92195	6.19652	6.16723	0.996672	1.00621	0.980304	1.01681	1.03419	1.09311	0.973903	0.99781	1.00281	1.05461	1.02248	0.959939	0.95446	0.994316	1.12238	1.00475	-0.00480999	0.00893469	-0.0286984	0.0240527	0.0484956	0.128433	-0.0381503	-0.00316327	0.00404889	0.0767141	0.0320665	-0.0589859	-0.0672438
P12236	SLC25A6	ADP/ATP translocase 3	95	6.31034	6.18078	6.25102	6.09767	6.27559	6.08348	6.24109	6.39615	6.33878	6.18472	6.0935	6.42181	6.83463	6.20716	5.93612	6.14715	6.20995	1.01617	0.995302	1.00661	0.981919	1.01057	0.979634	1.00501	1.02998	1.02075	0.995937	0.981247	1.03412	1.10059	0.99955	0.955904	0.989887	0.0231355	-0.00679332	0.00950939	-0.0263242	0.0151689	-0.0296854	0.00721578	0.0426215	0.029623	-0.00587395	-0.0273111	0.0483977	0.138281
P09874	PARP1	Poly [ADP-ribose] polymerase 1	95	6.25882	6.07926	6.31981	6.37069	6.33232	6.03334	6.22203	6.32607	6.44516	6.20959	6.25855	6.22695	6.16692	6.17972	6.2712	6.29957	6.25715	1.00027	0.971571	1.01001	1.01815	1.01201	0.964232	0.994388	1.01102	1.03005	0.9924	1.00022	0.995174	0.98558	0.987626	1.00225	1.00678	0.000386149	-0.0416088	0.0143766	0.0259451	0.0172296	-0.0525477	-0.00811919	0.015805	0.0427116	-0.0110065	0.000323911	-0.00697884	-0.0209544
P25205-2	MCM3	Isoform 2 of DNA replication licensing factor MCM3	95	6.23419	6.30335	6.15303	6.18282	6.28108	6.19433	6.10958	6.24358	6.27259	6.32307	6.2798	6.28141	6.3944	6.21711	6.21416	6.31551	6.21835	1.00255	1.01367	0.989496	0.994287	1.01009	0.996138	0.982509	1.00406	1.00872	1.01684	1.00988	1.01014	1.02831	0.999801	0.999327	1.01563	0.00367088	0.0195875	-0.0152342	-0.00826624	0.0144814	-0.005583	-0.025458	0.00584225	0.01253	0.0240939	0.0141874	0.0145572	0.0402778
P30613	PKLR	Pyruvate kinase PKLR	94	6.13301	6.06656	6.18452	5.93537	6.17268	7.1348	6.38861	6.13696	6.2133	6.51033	6.15805	6.10589	6.23335	6.35773	6.24329	6.02554	6.07986	1.00874	0.997812	1.01721	0.976234	1.01527	1.17351	1.05078	1.00939	1.02195	1.0708	1.01286	1.00428	1.02524	1.0457	1.02688	0.991065	0.012556	-0.00316061	0.0246223	-0.0347013	0.0218577	0.230834	0.0714628	0.0134849	0.0313204	0.0986914	0.0184343	0.00616231	0.0359684
Q9BXL5	HEMGN	Hemogen	94	6.09774	6.36239	6.03503	6.49579	6.27236	6.41964	6.17901	6.25484	5.94932	6.29814	6.17145	5.93988	6.31042	6.26768	6.57369	6.37263	6.24774	0.975992	1.01835	0.965954	1.0397	1.00394	1.02751	0.989	1.00114	0.952236	1.00807	0.98779	0.950725	1.01003	1.00319	1.05217	1.01999	-0.0350592	0.026235	-0.0499729	0.0561712	0.00567453	0.0391586	-0.0159581	0.00163914	-0.0706091	0.011592	-0.0177243	-0.0729001	0.0144022
P53621-2	COPA	Isoform 2 of Coatomer subunit alpha	94	6.23331	6.27663	6.26117	6.18652	6.32184	5.9206	6.21672	6.39781	6.34589	6.20438	6.25799	6.34981	6.442	6.16048	6.09138	6.33346	6.23941	0.999023	1.00597	1.00349	0.991524	1.01321	0.948904	0.996364	1.02539	1.01707	0.994386	1.00298	1.01769	1.03247	0.98735	0.976275	1.01507	-0.00141057	0.00858113	0.00502324	-0.0122809	0.0189355	-0.0756656	-0.00525543	0.0361691	0.0244135	-0.00812199	0.00429032	0.0253044	0.0460996
P0DP24	CALM2	Calmodulin-2	94	6.19533	6.21049	5.86869	5.97265	6.27169	7.40198	6.06482	5.80539	6.32438	6.52079	6.23191	6.24482	5.98851	5.96384	6.65285	6.28186	6.06179	1.02203	1.02453	0.968145	0.985295	1.03463	1.22109	1.0005	0.957702	1.04332	1.07572	1.02806	1.03019	0.987911	0.983841	1.09751	1.0363	0.0314373	0.0349632	-0.0467054	-0.0213727	0.0491104	0.288167	0.000720954	-0.0623509	0.0611802	0.105303	0.0399305	0.0429161	-0.0175468
Q9BXJ9	NAA15	N-alpha-acetyltransferase 15, NatA auxiliary subunit	93	6.185	6.21703	6.23651	6.16615	6.11432	7.0801	6.15806	6.21942	6.14671	6.2571	6.15695	6.02035	6.02302	6.19179	6.48987	6.33762	6.20117	0.997392	1.00256	1.0057	0.994352	0.985994	1.14174	0.993048	1.00294	0.991217	1.00902	0.992869	0.970841	0.971271	0.998487	1.04656	1.022	-0.00376743	0.00368452	0.00819789	-0.00817104	-0.020349	0.191229	-0.0100651	0.00423902	-0.0127266	0.0129531	-0.0103252	-0.0426937	-0.042054
Q13616	CUL1	Cullin-1	93	6.27626	6.33283	6.2704	6.06302	6.33525	6.41066	6.29541	6.24016	6.29263	6.30053	6.14223	6.22043	6.14044	6.28465	6.16812	6.22697	6.23563	1.00652	1.01559	1.00558	0.972319	1.01598	1.02807	1.00959	1.00073	1.00914	1.01041	0.985022	0.997563	0.984735	1.00786	0.989174	0.998612	0.00937037	0.0223156	0.00802273	-0.0404982	0.0228668	0.0399381	0.0137656	0.00104827	0.0131284	0.0149384	-0.0217722	-0.00352043	-0.0221927
P49792	RANBP2	E3 SUMO-protein ligase RanBP2	93	6.15389	6.16392	6.45164	6.35686	6.1409	6.03677	6.36822	6.23227	6.147	6.23319	6.37181	6.35341	6.05367	6.23588	6.32269	6.37788	6.28158	0.979673	0.981269	1.02707	1.01198	0.977605	0.961028	1.01379	0.99215	0.978576	0.992297	1.01436	1.01144	0.963718	0.992725	1.00654	1.01533	-0.0296283	-0.0272788	0.038539	0.0171874	-0.0326768	-0.0573501	0.0197633	-0.0113692	-0.0312444	-0.0111562	0.0205763	0.0164042	-0.0533169
Q16891-4	IMMT	Isoform 4 of MICOS complex subunit MIC60	92	6.16941	6.1268	6.3077	6.49559	6.35878	6.06688	6.335	6.35742	6.1279	6.29726	6.2435	6.03627	6.28128	6.15394	6.41057	6.23169	6.27487	0.983192	0.976402	1.00523	1.03517	1.01337	0.966853	1.00958	1.01315	0.976577	1.00357	0.995	0.961975	1.00102	0.980727	1.02163	0.993118	-0.0244542	-0.034453	0.00752733	0.0498739	0.0191633	-0.0486319	0.0137579	0.0188547	-0.034194	0.00513751	-0.00723171	-0.0559294	0.00147186
P49915	GMPS	GMP synthase [glutamine-hydrolyzing]	92	6.0505	6.05148	6.18096	6.28443	6.32546	6.78226	6.0934	6.1858	6.11873	6.42634	6.25301	6.02033	6.31524	6.24418	6.4251	6.24279	6.14184	0.985128	0.985287	1.00637	1.02322	1.0299	1.10427	0.992113	1.00716	0.996237	1.04632	1.0181	0.980216	1.02823	1.01666	1.04612	1.01644	-0.0216171	-0.0213835	0.00915941	0.0331104	0.0424989	0.143095	-0.0114241	0.0102887	-0.00543928	0.0653258	0.0258793	-0.0288289	0.040166
P14314-2	PRKCSH	Isoform 2 of Glucosidase 2 subunit beta	92	6.25298	6.12409	6.09417	6.33954	6.26121	7.17374	6.18016	6.08329	6.12019	6.14567	6.21442	6.10442	6.09059	6.33992	6.27671	6.19889	6.2027	1.00811	0.987327	0.982504	1.02206	1.00943	1.15655	0.996367	0.980749	0.986699	0.990806	1.00189	0.984156	0.981926	1.02212	1.01193	0.999387	0.0116487	-0.0183997	-0.0254654	0.031483	0.0135463	0.20983	-0.005251	-0.0280434	-0.0193187	-0.0133249	0.00272456	-0.023041	-0.0263132
P22234-2	PAICS	Isoform 2 of Multifunctional protein ADE2	91	6.15782	6.04679	6.24827	6.13148	6.18119	6.58595	6.35092	6.12927	6.27076	6.34893	6.17955	6.20903	6.36372	6.49561	6.14118	6.15952	6.14609	1.00191	0.983843	1.01663	0.997623	1.00571	1.07157	1.03333	0.997263	1.02028	1.033	1.00544	1.01024	1.03541	1.05687	0.999201	1.00219	0.0027508	-0.0234994	0.0237879	-0.00343354	0.00821572	0.0997227	0.0472967	-0.00395363	0.0289714	0.0468446	0.00783289	0.014699	0.0502015
Q92900	UPF1	Regulator of nonsense transcripts 1	90	6.21155	6.19687	6.31798	6.13002	6.2243	5.87569	6.33111	6.19672	6.37877	6.35431	6.27803	6.25449	6.55371	6.27587	6.15242	6.26814	6.2141	0.999589	0.997226	1.01672	0.986469	1.00164	0.945541	1.01883	0.997202	1.0265	1.02256	1.01029	1.0065	1.05465	1.00994	0.990073	1.0087	-0.000593302	-0.00400692	0.0239168	-0.0196548	0.00236498	-0.0807883	0.0269118	-0.00404184	0.0377316	0.0321889	0.0147653	0.00934563	0.0767652
O00232	PSMD12	26S proteasome non-ATPase regulatory subunit 12	90	6.38135	6.30803	6.32747	6.36959	6.2718	6.26336	6.15914	6.30542	6.16859	6.19256	6.2574	6.179	6.22009	6.06766	6.19851	6.33002	6.34661	1.00547	0.993921	0.996984	1.00362	0.988213	0.986883	0.970461	0.99351	0.97195	0.975727	0.985944	0.973591	0.980065	0.956047	0.976665	0.997386	0.00787547	-0.00879667	-0.00435743	0.00521432	-0.0171066	-0.0190494	-0.0432573	-0.00939372	-0.0410454	-0.0354502	-0.0204229	-0.0386128	-0.0290507
P63010-2	AP2B1	Isoform 2 of AP-2 complex subunit beta	88	6.12946	6.06312	6.27598	6.07379	6.5026	5.97083	6.32653	6.45523	6.47817	6.24209	6.32501	6.30706	6.32312	6.22621	6.14898	6.15184	6.13559	0.999001	0.988189	1.02288	0.989928	1.05982	0.973147	1.03112	1.0521	1.05584	1.01736	1.03087	1.02795	1.03056	1.01477	1.00218	1.00265	-0.00144151	-0.0171411	0.0326393	-0.0146045	0.0838152	-0.03927	0.0442129	0.073267	0.0783848	0.0248277	0.0438663	0.0397662	0.0434351
P38606	ATP6V1A	V-type proton ATPase catalytic subunit A	88	6.34798	6.22232	6.40414	6.28889	6.27211	6.11911	6.32186	6.23833	6.09853	6.20564	6.21635	6.16274	6.29243	6.16492	6.20983	6.43483	6.31583	1.00509	0.985194	1.01398	0.995734	0.993077	0.968852	1.00095	0.987729	0.965594	0.982553	0.984249	0.975761	0.996295	0.976106	0.983216	1.01884	0.00732467	-0.0215203	0.0200319	-0.00616751	-0.010022	-0.0456511	0.00137618	-0.017813	-0.0505114	-0.0253929	-0.0229052	-0.035401	-0.00535565
O60763	USO1	General vesicular transport factor p115	88	6.30384	6.1597	6.44786	6.13607	6.25541	5.809	6.55894	6.25197	6.33023	6.30694	6.30025	6.40797	6.01842	6.35357	6.06801	6.29182	6.26187	1.0067	0.983684	1.0297	0.979911	0.998969	0.927679	1.04744	0.998419	1.01092	1.0072	1.00613	1.02333	0.961122	1.01464	0.969042	1.00478	0.00963794	-0.0237329	0.0422274	-0.029278	-0.00148854	-0.108303	0.0668697	-0.00228213	0.0156649	0.0103472	0.0088161	0.0332744	-0.0572082
Q8WUM4	PDCD6IP	Programmed cell death 6-interacting protein	87	6.15846	5.99704	6.21738	6.3629	6.30621	7.0868	6.02997	6.20078	6.28443	6.23734	6.17695	6.12425	6.15962	6.02475	6.41426	6.21882	6.18395	0.995879	0.969776	1.00541	1.02894	1.01977	1.146	0.975101	1.00272	1.01625	1.00863	0.998869	0.990347	0.996066	0.974257	1.03724	1.00564	-0.00595786	-0.0442769	0.00777927	0.041157	0.0282457	0.196607	-0.0363767	0.00392222	0.0232544	0.0124034	-0.00163284	-0.0139943	-0.00568614
P35658	NUP214	Nuclear pore complex protein Nup214	87	6.18241	6.04056	6.58778	6.1164	6.23191	5.67308	6.60829	6.2629	6.68749	6.20469	6.30442	6.46986	6.11164	6.3743	5.93547	6.20879	6.23179	0.992077	0.969314	1.05713	0.981484	1.00002	0.910346	1.06042	1.00499	1.07313	0.995652	1.01166	1.0382	0.98072	1.02287	0.952451	0.99631	-0.0114767	-0.0449637	0.0801463	-0.0269633	2.83592e-05	-0.135514	0.084631	0.0071848	0.101819	-0.00628691	0.0167176	0.0540885	-0.0280865
P12004	PCNA	Proliferating cell nuclear antigen	87	6.39626	6.12527	6.24852	6.41767	6.42364	6.00463	6.23457	6.27495	6.15382	6.00791	6.34864	6.21893	6.32541	6.13098	6.23501	6.45378	6.29693	1.01577	0.972739	0.992312	1.01917	1.02012	0.953581	0.990097	0.996509	0.977273	0.954101	1.00821	0.987613	1.00452	0.973646	0.990167	1.02491	0.02258	-0.0398752	-0.0111341	0.027401	0.0287424	-0.0685733	-0.0143586	-0.00504467	-0.0331664	-0.0677854	0.0117989	-0.0179823	0.00651037
P61204	ARF3	ADP-ribosylation factor 3	87	6.83226	6.36055	6.32446	6.35439	6.38073	5.67743	6.24485	6.23945	6.35457	5.88905	6.28609	6.63203	6.39338	5.62497	5.85487	6.55093	6.46791	1.05633	0.9834	0.977821	0.982448	0.98652	0.877784	0.965512	0.964677	0.982476	0.910502	0.971888	1.02537	0.988476	0.869673	0.905218	1.01283	0.0790622	-0.0241492	-0.0323584	-0.0255471	-0.0195792	-0.188063	-0.0506338	-0.0518819	-0.0255062	-0.135266	-0.0411378	0.0361498	-0.0167219
P17174	GOT1	Aspartate aminotransferase, cytoplasmic	87	6.30398	6.14947	6.10107	6.16157	6.34927	6.26629	6.24107	6.231	6.18966	6.2484	6.29775	6.26158	6.33578	6.32376	6.26607	6.27327	6.17902	1.02022	0.995217	0.987384	0.997176	1.02755	1.01412	1.01004	1.00841	1.00172	1.01123	1.01921	1.01336	1.02537	1.02342	1.01409	1.01525	0.0288843	-0.00691655	-0.0183163	-0.00408062	0.0392121	0.0202329	0.0144148	0.0120851	0.00248154	0.0161082	0.0274579	0.0191481	0.0361436
Q9NYU2	UGGT1	UDP-glucose:glycoprotein glucosyltransferase 1	86	6.24215	6.16765	6.28916	6.06306	6.22382	6.21552	6.36057	6.27451	6.25587	6.39714	6.25547	6.19018	6.45091	6.2462	6.12154	6.24626	6.1905	1.00834	0.996308	1.01594	0.979413	1.00538	1.00404	1.02747	1.01357	1.01056	1.03338	1.01049	0.999948	1.04207	1.009	0.98886	1.00901	0.0119859	-0.00533621	0.0228102	-0.030011	0.00774323	0.00581799	0.039099	0.0194457	0.0151534	0.04737	0.0150612	-7.57431e-05	0.0594456
Q9Y6A5	TACC3	Transforming acidic coiled-coil-containing protein 3	86	6.36596	6.39451	6.18695	6.29443	6.31616	6.36512	6.17674	6.2082	5.90739	6.17659	6.20408	6.15251	6.37788	6.17159	6.39268	6.30921	6.31046	1.00879	1.01332	0.980427	0.997459	1.0009	1.00866	0.978809	0.983795	0.936126	0.978786	0.983142	0.97497	1.01068	0.977993	1.01303	0.999802	0.0126323	0.0190881	-0.0285174	-0.00367001	0.00130197	0.012442	-0.0309001	-0.0235707	-0.0952249	-0.0309352	-0.0245285	-0.0365706	0.0153312
Q14697-2	GANAB	Isoform 2 of Neutral alpha-glucosidase AB	86	6.27981	6.22126	6.20238	6.17529	6.46439	6.24209	6.27703	6.24211	6.20356	6.31491	6.26497	6.07452	6.13486	6.28877	6.32176	6.2923	6.21969	1.00967	1.00025	0.997218	0.992862	1.03934	1.0036	1.00922	1.00361	0.997407	1.01531	1.00728	0.97666	0.986362	1.01111	1.01641	1.01168	0.0138794	0.000365285	-0.0040196	-0.0103346	0.0556727	0.00518764	0.0132406	0.00519227	-0.00374515	0.0219207	0.0104661	-0.0340711	-0.0198111
Q01518	CAP1	Adenylyl cyclase-associated protein 1	86	6.16602	6.11975	6.25532	6.27677	6.14837	5.9898	6.26199	6.28847	6.38775	6.29237	6.21317	6.26476	6.5932	6.38522	6.14515	6.2119	6.20446	0.993804	0.986346	1.0082	1.01165	0.990959	0.965402	1.00927	1.01354	1.02954	1.01417	1.0014	1.00972	1.06265	1.02913	0.99044	1.0012	-0.00896725	-0.0198341	0.0117769	0.0167155	-0.0131028	-0.050799	0.0133144	0.0194022	0.042001	0.0202967	0.00202271	0.0139524	0.087672
P43487	RANBP1	Ran-specific GTPase-activating protein	85	6.27186	6.3454	5.87085	6.59717	6.2093	7.37841	6.02625	6.18153	5.60414	6.1506	6.12042	5.96355	5.88256	5.9353	6.86149	6.60116	6.27132	1.00009	1.01181	0.936143	1.05196	0.990111	1.17653	0.960922	0.985682	0.893614	0.98075	0.975938	0.950924	0.93801	0.94642	1.09411	1.05259	0.00012422	0.016942	-0.0951997	0.0730781	-0.0143385	0.234541	-0.0575086	-0.0208052	-0.162276	-0.028042	-0.0351385	-0.0725977	-0.092325
P32119	PRDX2	Peroxiredoxin-2	85	6.32528	6.15192	6.20366	6.13406	6.26654	6.31965	6.39676	6.23723	6.1766	6.20494	6.21729	6.33372	6.16747	6.14304	6.21144	6.51042	6.20373	1.01959	0.991649	0.999989	0.98877	1.01012	1.01869	1.03112	1.0054	0.995627	1.0002	1.00219	1.02095	0.994155	0.990217	1.00124	1.04944	0.0279934	-0.0120992	-1.62788e-05	-0.0162936	0.0145332	0.0267088	0.0442055	0.00776956	-0.00632299	0.000281362	0.00314998	0.0299172	-0.00845711
P60842	EIF4A1	Eukaryotic initiation factor 4A-I	85	6.27281	5.89009	6.6299	6.1737	6.37108	5.72908	6.50532	6.1748	6.68369	6.22505	6.38402	6.34667	6.50189	6.2181	5.85996	6.03385	6.24162	1.005	0.943679	1.06221	0.989117	1.02074	0.917883	1.04225	0.989294	1.07083	0.997344	1.02281	1.01683	1.0417	0.996231	0.938852	0.966711	0.00719018	-0.083632	0.0870654	-0.0157863	0.0296163	-0.123618	0.0596983	-0.0155293	0.0987231	-0.00383626	0.0325435	0.0240781	0.0589375
P50454	SERPINH1	Serpin H1	85	6.27097	6.10202	6.3691	6.02852	6.27226	5.8748	6.46857	6.31248	6.59637	6.32854	6.14384	6.2609	6.42287	6.39657	5.97149	6.1807	6.19265	1.01265	0.985365	1.02849	0.973496	1.01286	0.948673	1.04456	1.01935	1.06519	1.02194	0.992118	1.01102	1.03718	1.03293	0.964286	0.99807	0.0181311	-0.0212706	0.040532	-0.0387536	0.0184279	-0.0760178	0.0628893	0.0276494	0.0911148	0.0313152	-0.0114168	0.0158126	0.0526606
P36578	RPL4	60S ribosomal protein L4	84	6.07615	6.13936	6.20812	6.21044	6.19083	6.2215	6.23178	6.36708	6.40817	6.46705	6.23424	6.23483	6.10136	6.42941	6.29071	6.18896	6.15852	0.986625	0.996889	1.00805	1.00843	1.00525	1.01023	1.0119	1.03387	1.04054	1.0501	1.0123	1.01239	0.990719	1.04399	1.02146	1.00494	-0.0194256	-0.00449483	0.0115733	0.0121124	0.00754974	0.0146794	0.0170612	0.0480488	0.0573293	0.0705247	0.0176306	0.0177671	-0.0134522
P53999	SUB1	Activated RNA polymerase II transcriptional coactivator p15	84	5.87721	5.95098	6.13826	5.96384	6.05513	8.60042	6.23691	5.82849	6.31672	6.53596	6.10804	5.82892	5.70612	6.13201	6.97859	5.7424	5.98257	0.982388	0.994719	1.02602	0.996869	1.01213	1.43758	1.04251	0.974245	1.05585	1.0925	1.02097	0.974317	0.95379	1.02498	1.16649	0.959855	-0.0256345	-0.00763871	0.0370638	-0.00452442	0.017392	0.523641	0.0600655	-0.0376438	0.0784096	0.127633	0.0299435	-0.0375374	-0.0682559
P78417	GSTO1	Glutathione S-transferase omega-1	84	6.05168	6.03309	5.88211	6.04669	6.14621	9.00973	6.10094	6.18362	5.82892	6.26639	5.99619	5.71778	5.84146	6.25283	6.50128	6.14107	6.00339	1.00804	1.00495	0.979798	1.00721	1.02379	1.50077	1.01625	1.03002	0.970938	1.04381	0.9988	0.952425	0.973027	1.04155	1.08293	1.02293	0.0115577	0.00711911	-0.0294442	0.0103676	0.0339191	0.585706	0.0232535	0.0426737	-0.0425494	0.0618566	-0.0017319	-0.0703229	-0.039449
O75643	SNRNP200	U5 small nuclear ribonucleoprotein 200 kDa helicase	83	6.26528	6.11412	6.43534	6.29468	6.31295	5.87307	6.37072	6.40808	6.48019	6.16393	6.23304	6.37617	6.25543	6.10992	6.08119	6.2259	6.27736	0.998076	0.973996	1.02517	1.00276	1.00567	0.935596	1.01487	1.02082	1.03231	0.981931	0.99294	1.01574	0.996507	0.973327	0.96875	0.991803	-0.00277781	-0.0380119	0.0358596	0.00397624	0.00815753	-0.096042	0.0212996	0.0297354	0.0458793	-0.0263063	-0.0102208	0.0225333	-0.00504774
Q9Y265	RUVBL1	RuvB-like 1	83	6.21522	6.21201	6.34234	6.28473	6.33501	6.23428	6.38713	6.24372	6.19931	6.25439	6.26296	6.20955	6.18122	6.21456	6.19567	6.2279	6.26358	0.99228	0.991767	1.01258	1.00338	1.0114	0.995323	1.01973	0.99683	0.98974	0.998534	0.999902	0.991375	0.986852	0.992175	0.989159	0.994304	-0.0111809	-0.0119262	0.0180289	0.00486444	0.0163606	-0.00676337	0.0281815	-0.00458048	-0.0148787	-0.00211714	-0.00014166	-0.0124976	-0.0190947
P05388	RPLP0	60S acidic ribosomal protein P0	82	6.28627	6.3491	6.32413	6.05632	6.22838	6.11723	6.32425	6.29614	6.34706	6.15544	6.32578	6.33244	6.36834	6.38179	6.01645	6.09088	6.25395	1.00517	1.01521	1.01122	0.968398	0.995911	0.978138	1.01124	1.00675	1.01489	0.984248	1.01148	1.01255	1.01829	1.02044	0.962023	0.973925	0.0074354	0.0217833	0.0160982	-0.0463274	-0.00591187	-0.0318903	0.0161256	0.00969878	0.0213196	-0.0229069	0.0164745	0.0179927	0.0261485
P50395	GDI2	Rab GDP dissociation inhibitor beta	82	6.17014	5.93832	6.27069	6.14602	6.25297	7.54659	6.30437	6.04846	6.15954	6.26092	6.16114	6.09413	6.11057	6.28996	6.17777	6.06842	6.13129	1.00634	0.968527	1.02274	1.0024	1.01985	1.23083	1.02823	0.98649	1.00461	1.02114	1.00487	0.993939	0.99662	1.02588	1.00758	0.989746	0.00911199	-0.0461364	0.032433	0.00346123	0.0283504	0.299634	0.040161	-0.0196234	0.00663138	0.0301834	0.00700609	-0.00877096	-0.00488427
P31150	GDI1	Rab GDP dissociation inhibitor alpha	82	6.18866	6.2388	5.95023	6.16674	6.31861	7.98108	5.95989	6.1301	5.79394	6.54814	6.12886	5.90958	5.96563	6.07032	6.58695	6.06246	6.13611	1.00856	1.01674	0.969708	1.00499	1.02974	1.30067	0.971282	0.999021	0.944237	1.06715	0.998819	0.963083	0.972217	0.989279	1.07347	0.987998	0.0123033	0.0239448	-0.0443783	0.00718426	0.0422835	0.37926	-0.0420381	-0.00141315	-0.082779	0.0937614	-0.00170501	-0.0542682	-0.0406493
P26641-2	EEF1G	Isoform 2 of Elongation factor 1-gamma	81	6.38481	6.1429	6.31032	6.29918	6.37167	6.14338	6.14451	6.33142	6.18884	6.15915	6.37197	6.1297	6.2828	6.1333	6.28098	6.32507	6.2843	1.01599	0.977499	1.00414	1.00237	1.0139	0.977575	0.977755	1.0075	0.984809	0.980085	1.01395	0.975399	0.999761	0.975971	0.999471	1.00649	0.0228911	-0.0328327	0.00596054	0.00341141	0.0199189	-0.03272	-0.0324547	0.0107765	-0.0220836	-0.0290214	0.0199868	-0.0359362	-0.000344972
P40925-3	MDH1	Isoform 3 of Malate dehydrogenase, cytoplasmic	81	6.09194	6.05253	6.17007	6.39919	6.22361	6.90571	6.21259	6.13016	6.25476	6.33017	6.10945	6.01033	6.46218	6.27326	6.31033	6.06374	6.17843	0.986001	0.979622	0.998647	1.03573	1.00731	1.11771	1.00553	0.992187	1.01235	1.02456	0.988835	0.972792	1.04593	1.01535	1.02135	0.981437	-0.0203391	-0.0297025	-0.00195401	0.0506484	0.0105108	0.160549	0.00795398	-0.0113161	0.0177137	0.0350034	-0.0161984	-0.0397967	0.0647801
Q92973	TNPO1	Transportin-1	80	6.40956	6.03642	6.45816	6.1588	6.4957	5.55802	6.42562	6.36394	6.61372	6.02042	6.31217	6.43659	6.25715	6.14273	5.95819	6.35282	6.26573	1.02295	0.963402	1.03071	0.982933	1.0367	0.88705	1.02552	1.01567	1.05554	0.960848	1.00741	1.02727	0.99863	0.980369	0.950916	1.0139	0.0327416	-0.0537906	0.0436394	-0.0248345	0.0520012	-0.172913	0.0363519	0.0224365	0.0779782	-0.0576196	0.0106523	0.0388128	-0.00197806
Q12931	TRAP1	Heat shock protein 75 kDa, mitochondrial	80	6.28974	6.11299	6.33039	6.09887	6.29773	6.32703	6.23794	6.36808	6.49767	6.16643	6.18475	6.24272	6.31405	6.06275	5.99959	6.46927	6.208	1.01317	0.984696	1.01972	0.982421	1.01445	1.01917	1.00482	1.02579	1.04666	0.993304	0.996255	1.00559	1.01708	0.976603	0.966429	1.04209	0.0188724	-0.0222498	0.0281664	-0.025586	0.0207039	0.0274005	0.0069417	0.0367305	0.0657945	-0.00969248	-0.0054127	0.00804678	0.0244377
Q15393	SF3B3	Splicing factor 3B subunit 3	80	6.37437	6.19926	6.28764	6.17827	6.3058	5.96015	6.40088	6.25444	6.328	6.21598	6.25683	6.31333	6.32437	6.22847	6.11709	6.2551	6.25988	1.01829	0.990315	1.00443	0.986962	1.00733	0.952118	1.02252	0.99913	1.01088	0.992986	0.999512	1.00854	1.0103	0.994982	0.977189	0.999236	0.0261466	-0.0140401	0.00638246	-0.0189332	0.0105433	-0.0707875	0.0321341	-0.00125544	0.0156134	-0.0101543	-0.000704248	0.012265	0.0147856
O00299	CLIC1	Chloride intracellular channel protein 1	80	6.19893	6.0552	6.11424	6.33625	6.11843	5.93512	6.43087	6.50912	6.43927	6.29341	6.2988	6.13349	6.28078	6.37776	6.25141	6.22691	6.17615	1.00369	0.980416	0.989975	1.02592	0.990654	0.960973	1.04124	1.05391	1.0426	1.01899	1.01986	0.993092	1.01694	1.03264	1.01218	1.00822	0.00531025	-0.0285343	-0.0145358	0.0369203	-0.0135475	-0.0574318	0.058305	0.0757536	0.0601882	0.027133	0.028368	-0.0100007	0.0242348
P20042	EIF2S2	Eukaryotic translation initiation factor 2 subunit 2	80	6.15813	6.00678	6.4244	5.98115	6.34183	5.75099	6.61421	6.15838	6.60999	6.5044	6.40419	6.32181	5.80901	6.48302	6.31713	6.11459	6.14261	1.00253	0.977886	1.04587	0.973714	1.03243	0.936245	1.07677	1.00257	1.07609	1.0589	1.04258	1.02917	0.94569	1.05542	1.02841	0.995438	0.00363936	-0.0322611	0.0647088	-0.0384301	0.0460462	-0.0950426	0.106716	0.00369793	0.105795	0.082563	0.0601631	0.0414847	-0.0805606
P55196-5	AFDN	Isoform 5 of Afadin	79	6.13156	6.15286	6.32146	6.37472	6.26444	6.12036	6.26823	6.38925	6.40106	6.2958	6.25149	6.37386	6.28561	6.05531	6.13764	6.17636	6.24515	0.981811	0.985222	1.01222	1.02075	1.00309	0.980018	1.0037	1.02307	1.02496	1.00811	1.00102	1.02061	1.00648	0.969602	0.982785	0.988985	-0.0264821	-0.0214791	0.0175216	0.0296258	0.00444932	-0.0291197	0.00532189	0.0329104	0.0355746	0.0116535	0.00146386	0.0294311	0.00931654
P36776	LONP1	Lon protease homolog, mitochondrial	79	6.36054	6.02571	6.28289	6.13652	6.32489	6.60181	6.25879	6.14736	6.21135	6.17173	6.35323	6.14671	6.28482	6.13469	6.18804	6.37092	6.20141	1.02566	0.971667	1.01314	0.989535	1.01991	1.06457	1.00925	0.991283	1.0016	0.995213	1.02448	0.991179	1.01345	0.98924	0.997843	1.02733	0.0365518	-0.0414662	0.0188309	-0.0151767	0.028443	0.0902642	0.0132863	-0.0126305	0.00230943	-0.00692249	0.0348928	-0.012783	0.019274
Q13813	SPTAN1	Spectrin alpha chain, non-erythrocytic 1	78	6.31398	6.39944	6.33154	6.20488	6.36035	5.48272	6.4371	6.36126	6.39865	6.30326	6.31819	6.28503	6.26763	6.22521	5.97524	6.33551	6.31246	1.00024	1.01378	1.00302	0.982958	1.00759	0.868555	1.01975	1.00773	1.01365	0.998543	1.00091	0.995655	0.992898	0.986178	0.946579	1.00365	0.00034735	0.0197433	0.0043541	-0.024799	0.0109038	-0.203311	0.0282085	0.0111102	0.0195652	-0.00210417	0.00130898	-0.00628271	-0.0102823
P02100	HBE1	Hemoglobin subunit epsilon	78	6.00761	6.36557	5.86606	6.93674	6.42724	8.05656	5.52207	6.01044	5.88136	5.84147	5.91198	5.95261	6.43301	5.8376	6.68801	6.26168	6.29399	0.954499	1.01137	0.932009	1.10212	1.02117	1.28004	0.877355	0.954948	0.93444	0.928102	0.939305	0.94576	1.02209	0.927487	1.0626	0.994866	-0.0671849	0.0163137	-0.101584	0.140282	0.0302233	0.356188	-0.188767	-0.0665054	-0.0978262	-0.107645	-0.0903346	-0.0804537	0.0315179
P00505	GOT2	Aspartate aminotransferase, mitochondrial	78	6.34146	6.17291	6.17094	6.03616	6.3789	6.28128	6.35107	6.2271	6.30331	6.27423	6.28036	6.27658	6.35359	6.35358	6.04874	6.14979	6.18037	1.02607	0.998793	0.998475	0.976667	1.03212	1.01633	1.02762	1.00756	1.01989	1.01519	1.01618	1.01557	1.02803	1.02803	0.978702	0.995052	0.0371224	-0.00174187	-0.00220236	-0.0340616	0.045615	0.023366	0.039307	0.0108678	0.028417	0.0217458	0.0231546	0.022286	0.0398794
P51572-2	BCAP31	Isoform 2 of B-cell receptor-associated protein 31	78	6.21132	6.33955	5.8714	6.40758	6.17811	7.35314	5.96898	6.19869	5.63559	6.24805	6.18856	5.8674	6.0374	6.43808	6.84266	6.21349	6.20746	1.00062	1.02128	0.945862	1.03224	0.995271	1.18456	0.961581	0.998587	0.907873	1.00654	0.996955	0.945217	0.972604	1.03715	1.10233	1.00097	0.000896255	0.0303768	-0.0802991	0.0457759	-0.00683808	0.244357	-0.0565192	-0.00204029	-0.139437	0.00940236	-0.00439989	-0.0812823	-0.0400763
Q99798	ACO2	Aconitate hydratase, mitochondrial	78	6.14247	6.06105	6.39867	6.11927	6.25972	5.88082	6.30188	6.26206	6.62779	6.35084	6.18455	6.31054	6.64839	6.36217	5.96106	6.12872	6.18037	0.993868	0.980695	1.03532	0.990115	1.01284	0.951533	1.01966	1.01322	1.07239	1.02758	1.00068	1.02106	1.07573	1.02942	0.964516	0.991644	-0.00887314	-0.0281243	0.05008	-0.0143325	0.0184061	-0.0716747	0.0280902	0.0189453	0.100836	0.0392554	0.000976582	0.0300714	0.105313
P46940	IQGAP1	Ras GTPase-activating-like protein IQGAP1	78	6.30001	6.15807	6.37681	6.38682	6.33845	6.00266	6.16758	6.22229	6.4217	6.24323	6.23172	6.20226	6.21352	6.10331	6.28862	6.34295	6.30543	0.999141	0.97663	1.01132	1.01291	1.00524	0.951983	0.978138	0.986815	1.01844	0.990136	0.98831	0.983638	0.985424	0.967945	0.997334	1.00595	-0.00124007	-0.0341159	0.0162407	0.0185036	0.0075359	-0.0709922	-0.0318897	-0.0191486	0.0263611	-0.0143016	-0.0169638	-0.0238002	-0.0211834
Q7KZF4	SND1	Staphylococcal nuclease domain-containing protein 1	77	6.45144	6.21532	6.25968	6.31851	6.32811	6.23395	6.11736	6.19723	6.14368	6.28288	6.24815	6.10716	6.26896	6.08324	6.39849	6.34585	6.31124	1.02221	0.984802	0.991831	1.00115	1.00267	0.987754	0.969281	0.981936	0.973451	0.995507	0.990004	0.967664	0.993301	0.963874	1.01382	1.00548	0.0316983	-0.0220942	-0.011834	0.00166147	0.00385176	-0.0177763	-0.0450137	-0.0262994	-0.0388198	-0.00649689	-0.0144938	-0.0474213	-0.00969679
Q86UX7	FERMT3	Fermitin family homolog 3	77	6.34133	6.14807	6.29767	6.09379	6.42168	6.1587	6.35076	6.2831	6.34952	6.19875	6.29358	6.38831	6.26908	6.13181	6.09358	6.18027	6.22021	1.01947	0.988402	1.01245	0.979675	1.03239	0.99011	1.02099	1.01011	1.02079	0.996549	1.01179	1.02702	1.00786	0.985787	0.979641	0.993578	0.027821	-0.0168309	0.0178537	-0.0296247	0.0459863	-0.0143386	0.0299648	0.0145121	0.0296831	-0.00498713	0.0169165	0.0384699	0.0112893
P78559	MAP1A	Microtubule-associated protein 1A	76	5.97696	6.08731	6.32207	6.75591	6.04727	5.95531	6.33399	6.25548	6.3496	6.34878	6.28528	6.2665	6.15651	6.19832	6.53094	6.12977	6.28556	0.950903	0.968459	1.00581	1.07483	0.962089	0.947459	1.0077	0.995214	1.01019	1.01006	0.999955	0.996967	0.979468	0.98612	1.03904	0.975214	-0.07263	-0.046237	0.00835515	0.104108	-0.0557579	-0.0778652	0.0110727	-0.00692127	0.0146239	0.0144375	-6.48423e-05	-0.00438197	-0.0299291
Q9C0C9	UBE2O	(E3-independent) E2 ubiquitin-conjugating enzyme	76	6.13317	6.20889	6.45948	6.06362	6.23115	5.76851	6.407	6.32527	6.51251	6.33602	6.272	6.46888	6.25333	6.41413	6.00252	6.14351	6.21629	0.986629	0.99881	1.03912	0.97544	1.00239	0.927967	1.03068	1.01753	1.04765	1.01926	1.00896	1.04063	1.00596	1.03183	0.965611	0.988292	-0.0194209	-0.00171844	0.0553642	-0.0358745	0.00344464	-0.107855	0.0435952	0.0250733	0.0671599	0.0275231	0.0128718	0.0574621	0.00857084
P05455	SSB	Lupus La protein	76	6.38139	6.16444	6.39256	6.41182	6.2698	5.73132	6.38123	6.33461	6.22157	6.16105	6.30661	6.18368	6.13976	6.28772	6.13629	6.49614	6.33755	1.00692	0.972685	1.00868	1.01172	0.989309	0.904343	1.00689	0.999536	0.981699	0.97215	0.995118	0.975721	0.96879	0.992137	0.968243	1.02502	0.00994491	-0.039956	0.012468	0.0168081	-0.0155064	-0.145058	0.00990874	-0.000669993	-0.0266471	-0.0407495	-0.00706107	-0.0354601	-0.0457435
P29144	TPP2	Tripeptidyl-peptidase 2	76	6.22225	6.25551	6.33442	6.35087	6.27868	6.17779	6.21435	6.27758	6.04989	6.2925	6.31178	6.24464	6.14732	6.22114	6.24121	6.38005	6.29076	0.989109	0.994396	1.00694	1.00955	0.998079	0.982042	0.987853	0.997904	0.96171	1.00028	1.00334	0.992668	0.977198	0.988933	0.992123	1.01419	-0.0157985	-0.00810739	0.00997763	0.0137193	-0.00277361	-0.0261441	-0.0176314	-0.00302639	-0.056326	0.000398415	0.00481202	-0.0106165	-0.0332773
P48634	PRRC2A	Protein PRRC2A	76	6.20126	6.12444	6.36545	6.24492	6.2569	6.01128	6.34325	6.10331	6.47165	6.29459	6.27939	6.29713	6.24121	6.3645	6.16541	6.23532	6.23402	0.994745	0.982423	1.02108	1.00175	1.00367	0.964271	1.01752	0.979033	1.03812	1.00972	1.00728	1.01012	1.00115	1.02093	0.988995	1.00021	-0.00760083	-0.0255843	0.0301003	0.00252089	0.00528584	-0.05249	0.02506	-0.0305703	0.0539714	0.0139502	0.0104622	0.0145322	0.00166355
P41252	IARS	Isoleucine--tRNA ligase, cytoplasmic	76	6.34252	6.15752	6.38872	6.34638	6.28056	5.92706	6.28073	6.2628	6.44672	6.19299	6.1739	6.21749	6.35599	6.14407	6.12895	6.3536	6.30879	1.00535	0.976023	1.01267	1.00596	0.995526	0.939493	0.995553	0.992711	1.02186	0.981645	0.978619	0.985529	1.00748	0.973891	0.971495	1.0071	0.00769398	-0.0350128	0.0181647	0.00857172	-0.00646898	-0.0900455	-0.00642993	-0.0105544	0.0312031	-0.0267261	-0.0311801	-0.0210299	0.0107547
Q9UHX1-2	PUF60	Isoform 2 of Poly(U)-binding-splicing factor PUF60	76	6.13959	6.32361	6.08703	6.20723	6.36888	6.85005	6.01821	6.25186	6.02777	6.28961	6.20658	6.01295	6.46331	6.08144	6.46829	6.20359	6.18936	0.991958	1.02169	0.983466	1.00289	1.029	1.10675	0.972347	1.0101	0.973892	1.0162	1.00278	0.971497	1.04426	0.982563	1.04507	1.0023	-0.0116491	0.030957	-0.0240529	0.0041582	0.0412483	0.146323	-0.040457	0.0144941	-0.038167	0.0231792	0.00400712	-0.0417184	0.0624818
P68371	TUBB4B	Tubulin beta-4B chain	75	6.01824	6.08614	6.06498	5.9699	6.38283	7.29686	6.00839	6.13701	6.03836	6.49817	6.30387	6.0728	6.3432	6.17163	6.62744	5.98018	6.03481	0.997253	1.0085	1.005	0.989243	1.05767	1.20913	0.995621	1.01693	1.00059	1.07678	1.04458	1.00629	1.0511	1.02267	1.0982	0.990947	-0.0039679	0.012218	0.00719334	-0.0156028	0.0808867	0.273966	-0.00633109	0.0242264	0.000847226	0.106724	0.0629282	0.00905231	0.0719013
P04843	RPN1	Dolichyl-diphosphooligosaccharide--protein glycosyltransferase subunit 1	75	6.23419	6.16132	6.19349	6.22402	6.32397	6.24734	6.25529	6.35718	5.96037	6.22367	6.38271	6.1546	6.25796	6.20079	6.52748	6.2956	6.20325	1.00499	0.99324	0.998426	1.00335	1.01946	1.00711	1.00839	1.02481	0.960846	1.00329	1.02893	0.992157	1.00882	0.999603	1.05227	1.01489	0.00717669	-0.00978596	-0.00227284	0.00482126	0.0278051	0.0102166	0.0120513	0.0353615	-0.0576235	0.00474013	0.0411437	-0.0113603	0.012667
P36542	ATP5F1C	ATP synthase subunit gamma, mitochondrial	75	6.47625	6.32819	6.32065	6.18455	6.38815	5.94292	6.3634	6.31321	6.14044	6.22792	6.26331	6.30857	6.37478	6.10735	6.00845	6.25187	6.32741	1.02352	1.00012	0.998932	0.977422	1.0096	0.939234	1.00569	0.997756	0.970451	0.984276	0.989869	0.997022	1.00749	0.965221	0.949591	0.988061	0.0335436	0.000177835	-0.00154215	-0.0329465	0.0137831	-0.0904431	0.00818273	-0.00324134	-0.043273	-0.0228647	-0.0146898	-0.00430206	0.0107605
P69905	HBA1	Hemoglobin subunit alpha	75	6.22278	6.48946	6.78606	6.12222	6.81226	5.78558	5.69378	6.51648	6.71413	5.95181	6.13858	6.44569	6.33762	6.24907	5.79743	5.93704	6.40513	0.971531	1.01317	1.05947	0.955831	1.06356	0.903273	0.888941	1.01738	1.04824	0.929225	0.958385	1.00633	0.98946	0.975635	0.905123	0.92692	-0.0416686	0.0188706	0.0833463	-0.065173	0.0889056	-0.146766	-0.169841	0.024865	0.0679726	-0.105899	-0.0613229	0.00910695	-0.0152867
Q86UP2	KTN1	Kinectin	74	6.10517	6.1388	6.27736	6.1818	6.21727	6.3278	6.422	6.16785	6.2388	6.37516	6.34405	6.26916	6.161	6.28124	6.28037	6.21216	6.17578	0.988566	0.994012	1.01645	1.00097	1.00672	1.02462	1.03987	0.998716	1.0102	1.03228	1.02725	1.01512	0.997606	1.01708	1.01694	1.00589	-0.0165905	-0.00866528	0.023536	0.00140504	0.00965929	0.0350821	0.0564007	-0.00185426	0.0146466	0.0458396	0.0387822	0.0216502	-0.00345741
Q15075	EEA1	Early endosome antigen 1	74	6.25812	6.22025	6.18921	6.32803	6.33146	6.0788	6.37194	6.31772	6.32327	6.24376	6.33346	6.22095	5.89116	6.31843	6.30946	6.26397	6.2489	1.00148	0.995415	0.990448	1.01266	1.01321	0.972779	1.01969	1.01101	1.0119	0.999177	1.01353	0.995527	0.942751	1.01113	1.00969	1.00241	0.00212649	-0.00663026	-0.0138476	0.0181536	0.0189354	-0.0398163	0.0281299	0.0158012	0.017068	-0.00118775	0.019391	-0.00646792	-0.0850511
P04040	CAT	Catalase	74	6.2081	6.14584	6.21766	6.24082	6.23464	6.18507	6.25232	6.14225	6.31953	6.32777	6.23058	6.33561	6.57109	6.19045	6.20449	6.19379	6.2031	1.00081	0.990768	1.00235	1.00608	1.00508	0.997093	1.00793	0.99019	1.01877	1.0201	1.00443	1.02136	1.05932	0.99796	1.00022	0.998498	0.00116125	-0.0133803	0.00338118	0.00874506	0.00731571	-0.00420062	0.0114011	-0.0142233	0.0268267	0.0287066	0.00637592	0.030493	0.0831422
Q13451	FKBP5	Peptidyl-prolyl cis-trans isomerase FKBP5	74	6.24831	6.22309	6.30903	6.27343	6.25969	5.85167	6.40462	6.27546	6.39542	6.17821	6.24077	6.176	6.26415	6.31589	6.22384	6.36042	6.26347	0.99758	0.993554	1.00727	1.00159	0.999397	0.934254	1.02254	1.00192	1.02107	0.986389	0.996377	0.986036	1.00011	1.00837	0.993674	1.01548	-0.00349496	-0.00932988	0.0104572	0.00229346	-0.000869777	-0.0981126	0.032152	0.00276023	0.0300781	-0.0197721	-0.00523695	-0.0202882	0.000157771
Q8WWM7	ATXN2L	Ataxin-2-like protein	74	6.30743	6.42681	6.22774	6.1702	6.22073	6.22783	6.46373	6.18893	6.21696	6.22157	6.27624	6.23104	5.83678	6.38917	6.28693	6.3079	6.28305	1.00388	1.02288	0.991198	0.98204	0.990082	0.991212	1.02876	0.985021	0.989482	0.990216	0.998917	0.991723	0.928973	1.01689	1.00062	1.00396	0.00558838	0.0326389	-0.0127552	-0.0261467	-0.01438	-0.0127343	0.040903	-0.0217739	-0.0152546	-0.0141852	-0.00156339	-0.0119909	-0.106291
P50502	ST13	Hsc70-interacting protein	73	6.21001	6.12538	6.24526	6.48276	6.37259	6.22011	6.22105	6.18733	6.07079	6.21257	6.26957	6.25166	6.24595	6.17263	6.41705	6.29533	6.26585	0.991088	0.977581	0.996714	1.03462	1.01703	0.9927	0.99285	0.987468	0.968869	0.991496	1.00059	0.997735	0.996824	0.985122	1.02413	1.0047	-0.0129152	-0.0327115	-0.00474917	0.0490974	0.024369	-0.0105707	-0.0103527	-0.0181938	-0.0456265	-0.0123206	0.00085569	-0.00327149	-0.00458979
P52272	HNRNPM	Heterogeneous nuclear ribonucleoprotein M	73	6.39982	6.39735	6.25079	6.86505	6.19275	6.14895	6.02109	6.28306	5.64941	6.18774	6.3761	6.22879	5.9433	5.75289	6.65587	6.64703	6.47825	0.987893	0.987512	0.964888	1.05971	0.955929	0.949168	0.929431	0.96987	0.872058	0.955156	0.984231	0.961492	0.917423	0.888031	1.02742	1.02605	-0.0175734	-0.0181303	-0.0515662	0.0836655	-0.0650245	-0.0752646	-0.10558	-0.0441373	-0.197504	-0.0661921	-0.0229304	-0.0566528	-0.12434
P63104	YWHAZ	14-3-3 protein zeta/delta	73	5.9517	6.0322	6.09499	6.39473	5.86929	7.37974	6.08795	5.9664	6.83731	6.33982	6.00916	5.74175	5.72016	5.94623	7.40113	6.22743	6.1184	0.972754	0.985911	0.996173	1.04516	0.959284	1.20615	0.995022	0.975156	1.1175	1.03619	0.982145	0.938439	0.93491	0.971859	1.20965	1.01782	-0.0398538	-0.0204713	-0.00553175	0.0637278	-0.0599696	0.270414	-0.0071991	-0.0362949	0.160273	0.0512863	-0.0259923	-0.0916651	-0.0971001
P23246	SFPQ	Splicing factor, proline- and glutamine-rich	73	6.33245	6.35218	6.17882	6.49328	6.16863	6.11875	6.30283	6.25948	6.07925	6.13064	6.24456	6.04236	6.38991	6.19051	6.41221	6.30414	6.33918	0.998938	1.00205	0.974703	1.02431	0.973096	0.965227	0.994265	0.987427	0.958996	0.967103	0.985073	0.953177	1.008	0.976547	1.01152	0.994472	-0.00153302	0.00295499	-0.0369655	0.0346506	-0.0393467	-0.0510598	-0.00829705	-0.018254	-0.0604035	-0.0482591	-0.0216969	-0.0691847	0.0114988
P05198	EIF2S1	Eukaryotic translation initiation factor 2 subunit 1	73	6.26958	6.29436	6.28948	6.14495	6.31967	6.14357	6.31578	6.27175	6.19043	6.22867	6.25676	6.0885	6.41288	6.25243	6.17829	6.34291	6.24959	1.0032	1.00716	1.00638	0.983256	1.01121	0.983035	1.01059	1.00355	0.990533	0.996652	1.00115	0.974224	1.02613	1.00045	0.988591	1.01493	0.00460668	0.0102976	0.00917862	-0.0243609	0.0160871	-0.0246849	0.0151988	0.00510593	-0.0137225	-0.00483798	0.00165364	-0.0376753	0.0372103
Q12906-7	ILF3	Isoform 7 of Interleukin enhancer-binding factor 3	73	6.16961	6.15263	6.28506	6.24412	6.18715	6.56934	6.27579	6.17711	6.10085	6.28498	6.31166	6.06247	6.05337	6.34856	6.51783	6.25948	6.21286	0.993039	0.990306	1.01162	1.00503	0.995863	1.05738	1.01013	0.994247	0.981972	1.01161	1.0159	0.975795	0.97433	1.02184	1.04909	1.0075	-0.0100771	-0.0140531	0.0166701	0.00724188	-0.00598137	0.0804921	0.0145407	-0.00832436	-0.0262461	0.0166518	0.0227631	-0.0353507	-0.0375178
Q15365	PCBP1	Poly(rC)-binding protein 1	73	6.04733	5.90483	6.50734	6.20201	6.16618	5.673	6.63299	6.32324	6.58205	6.22992	6.33272	6.36099	6.47711	6.44347	6.07989	6.03693	6.16538	0.980853	0.95774	1.05546	1.00594	1.00013	0.920138	1.07584	1.0256	1.06758	1.01047	1.02714	1.03173	1.05056	1.04511	0.986134	0.979166	-0.0278909	-0.0622937	0.0778787	0.00854662	0.000187772	-0.120077	0.10547	0.0364747	0.0943478	0.0150244	0.0386361	0.0450621	0.071161
Q9HAV4	XPO5	Exportin-5	73	6.34886	6.19111	6.27066	6.3372	6.40882	5.98641	6.12439	6.36265	6.3069	6.17196	6.2777	6.43781	6.2832	5.99475	6.18194	6.31565	6.28696	1.00985	0.984755	0.997408	1.00799	1.01938	0.952195	0.974142	1.01204	1.00317	0.981709	0.998528	1.02399	0.999402	0.953522	0.983296	1.00456	0.0141356	-0.0221639	-0.00374471	0.0114835	0.0276967	-0.0706709	-0.0377959	0.0172658	0.00456905	-0.0266333	-0.00212592	0.034208	-0.000862507
Q15029	EFTUD2	116 kDa U5 small nuclear ribonucleoprotein component	73	6.04136	5.9769	6.09544	5.96976	6.17162	6.2697	6.21355	6.20454	6.3898	6.30319	6.32806	6.27336	6.62905	6.43117	6.58724	6.11523	6.02087	1.0034	0.992698	1.01239	0.991512	1.02504	1.04133	1.032	1.03051	1.06128	1.04689	1.05102	1.04194	1.10101	1.06815	1.09407	1.01567	0.00490259	-0.0105734	0.0177596	-0.0122978	0.0356785	0.0584256	0.045447	0.0433535	0.0858	0.0661114	0.0717925	0.0592676	0.138831
P49454	CENPF	Centromere protein F	73	6.59734	6.45776	6.5309	6.1054	6.11239	5.84414	6.39902	6.05872	6.44338	6.42924	6.18687	6.30125	6.24516	6.24344	5.92005	6.12494	6.42285	1.02717	1.00544	1.01682	0.950575	0.951663	0.909898	0.99629	0.943307	1.0032	1.00099	0.963259	0.981068	0.972335	0.972067	0.921717	0.953617	0.0386709	0.00782022	0.0240682	-0.0731278	-0.071477	-0.136223	-0.00536263	-0.0842006	0.00460408	0.0014346	-0.0540039	-0.0275756	-0.0404751
O14950	MYL12B	Myosin regulatory light chain 12B	73	6.02916	6.00945	5.98198	5.82651	6.07448	8.25747	5.99217	6.03561	6.17289	6.4162	6.18151	6.03753	6.20267	6.23994	6.57607	5.96635	5.96177	1.0113	1.008	1.00339	0.977311	1.0189	1.38507	1.0051	1.01238	1.03541	1.07622	1.03686	1.01271	1.04041	1.04666	1.10304	1.00077	0.0162151	0.011491	0.00488116	-0.0331099	0.027019	0.469958	0.00733663	0.0177577	0.0502042	0.105977	0.0522174	0.0182165	0.0571474
P25788	PSMA3	Proteasome subunit alpha type-3	73	6.2069	6.18252	6.21562	6.30987	6.34672	5.8958	6.24347	6.40079	6.1782	6.16502	6.28289	6.35537	6.42621	6.24364	6.06772	6.47925	6.22873	0.996496	0.992582	0.997896	1.01303	1.01894	0.94655	1.00237	1.02762	0.991888	0.989772	1.0087	1.02033	1.03171	1.00239	0.974151	1.04022	-0.00506455	-0.0107425	-0.00303915	0.0186728	0.0270737	-0.0792499	0.00341062	0.0393125	-0.0117509	-0.0148319	0.0124909	0.0290387	0.0450307
Q14103-3	HNRNPD	Isoform 3 of Heterogeneous nuclear ribonucleoprotein D0	73	6.14824	6.1742	6.18629	6.33256	6.07475	6.93583	6.24204	6.13588	6.16013	6.35339	6.06905	6.05771	6.4972	6.24607	6.26034	6.12631	6.21032	0.990003	0.994183	0.99613	1.01968	0.97817	1.11682	1.00511	0.988013	0.991918	1.02304	0.977252	0.975426	1.04619	1.00576	1.00805	0.986472	-0.0144947	-0.00841597	-0.00559372	0.0281207	-0.0318432	0.1594	0.00734941	-0.0173979	-0.0117074	0.0328584	-0.0331975	-0.0358957	0.0651499
P23284	PPIB	Peptidyl-prolyl cis-trans isomerase B	73	6.23494	5.94704	6.16611	6.11409	6.23838	6.5331	6.15404	6.35454	6.37383	6.25214	6.13244	6.23134	6.39297	6.43466	6.34713	6.09324	6.11555	1.01952	0.972446	1.00827	0.999762	1.02009	1.06828	1.00629	1.03908	1.04223	1.02234	1.00276	1.01893	1.04536	1.05218	1.03787	0.996353	0.0278946	-0.0403093	0.0118796	-0.000343284	0.0286904	0.0952866	0.00905275	0.0553066	0.0596795	0.031869	0.00398014	0.0270614	0.0640053
P55209	NAP1L1	Nucleosome assembly protein 1-like 1	72	5.59964	5.90179	6.02891	6.98909	6.03324	6.86456	6.02259	6.3115	6.15192	6.58119	6.31263	5.89634	5.67344	6.82413	6.88204	5.92698	6.12986	0.913502	0.962794	0.983532	1.14017	0.984238	1.11986	0.982501	1.02963	1.0036	1.07363	1.02982	0.961905	0.925542	1.11326	1.12271	0.966903	-0.130519	-0.0547009	-0.0239563	0.189251	-0.0229206	0.163314	-0.0254695	0.0421294	0.00518321	0.102495	0.0423877	-0.0560338	-0.11163
P42566	EPS15	Epidermal growth factor receptor substrate 15	72	6.30664	6.35714	6.25288	6.25623	6.21798	6.40078	6.32194	6.25037	6.05511	6.33561	6.37301	6.12191	5.92573	6.22557	6.4345	6.16459	6.29322	1.00213	1.01016	0.99359	0.994122	0.988044	1.01709	1.00456	0.993191	0.962164	1.00674	1.01268	0.972778	0.941605	0.98925	1.02245	0.97956	0.00307263	0.0145789	-0.00927812	-0.0085054	-0.017353	0.0244488	0.00656839	-0.00985736	-0.0556458	0.00968458	0.018176	-0.0398171	-0.0868061
P47756-2	CAPZB	Isoform 2 of F-actin-capping protein subunit beta	72	6.02661	6.17905	6.11547	6.09415	6.18321	7.23703	6.29312	6.1439	6.00999	6.53974	6.20367	6.06209	5.78225	6.33747	6.51362	6.27864	6.10382	0.987351	1.01233	1.00191	0.998416	1.01301	1.18566	1.03101	1.00657	0.984628	1.07142	1.01636	0.993163	0.947317	1.03828	1.06714	1.02864	-0.0183657	0.0176726	0.00275096	-0.00228741	0.0186436	0.245685	0.044063	0.00944232	-0.0223498	0.0995209	0.0234095	-0.00989715	-0.0780814
P07384	CAPN1	Calpain-1 catalytic subunit	72	6.2442	6.18614	6.54061	6.06517	6.23149	6.54811	6.40424	6.30481	6.08855	6.47175	6.34334	6.13589	6.03298	6.28185	6.16925	5.9516	6.25903	0.997631	0.988354	1.04499	0.969027	0.9956	1.04619	1.0232	1.00731	0.972763	1.03399	1.01347	0.980326	0.963884	1.00365	0.985656	0.950882	-0.00342234	-0.0168996	0.0634861	-0.045391	-0.00636193	0.0651395	0.0330883	0.0105138	-0.0398404	0.0482168	0.0193036	-0.0286665	-0.0530683
Q9Y4E8	USP15	Ubiquitin carboxyl-terminal hydrolase 15	72	6.25988	6.22784	6.09896	6.27031	6.25455	6.79381	6.06177	6.1937	6.1343	6.33634	6.27207	5.98047	6.30176	6.17183	6.3894	6.25302	6.21425	1.00734	1.00219	0.981448	1.00902	1.00649	1.09326	0.975463	0.996693	0.987135	1.01965	1.0093	0.96238	1.01408	0.993174	1.02819	1.00624	0.0105553	0.00315218	-0.0270164	0.0129571	0.00932639	0.128641	-0.0358406	-0.0047782	-0.018681	0.02807	0.013362	-0.0553208	0.0201751
Q92688	ANP32B	Acidic leucine-rich nuclear phosphoprotein 32 family member B	72	6.37891	6.49368	6.18849	6.11696	6.25176	6.26054	6.27401	6.33547	5.99481	6.31055	6.1323	6.19833	6.33771	6.25104	6.07915	6.39628	6.29451	1.01341	1.03164	0.983157	0.971793	0.993208	0.994603	0.996743	1.00651	0.952387	1.00255	0.97423	0.98472	1.00686	0.993094	0.965786	1.01617	0.0192158	0.0449422	-0.0245066	-0.0412792	-0.00983168	-0.00780697	-0.00470625	0.00935758	-0.07038	0.00367167	-0.0376658	-0.0222145	0.00986757
P23588	EIF4B	Eukaryotic translation initiation factor 4B	71	5.85642	5.86098	6.06823	6.40555	6.06066	6.68205	6.37365	6.40159	6.56762	6.29605	6.13522	6.02961	6.16238	6.65377	6.60782	5.8384	6.04779	0.968356	0.96911	1.00338	1.05915	1.00213	1.10487	1.05388	1.0585	1.08595	1.04105	1.01446	0.996993	1.01895	1.1002	1.0926	0.965377	-0.0463902	-0.0452673	0.00486653	0.0829132	0.00306567	0.143882	0.0757106	0.082021	0.118961	0.0580378	0.0207058	-0.00434455	0.0270784
Q14683	SMC1A	Structural maintenance of chromosomes protein 1A	71	6.25915	6.35453	6.31272	6.12527	6.21869	5.97599	6.4101	6.31389	6.26617	6.38289	6.29005	6.16442	6.08427	6.38026	6.22408	6.23752	6.26292	0.999398	1.01463	1.00795	0.978022	0.992938	0.954186	1.0235	1.00814	1.00052	1.01916	1.00433	0.984273	0.971475	1.01874	0.993799	0.995945	-0.000868124	0.0209505	0.0114269	-0.0320614	-0.0102242	-0.0676571	0.033512	0.0116943	0.000749036	0.0273749	0.00623661	-0.0228697	-0.0417507
O95782	AP2A1	AP-2 complex subunit alpha-1	71	6.36931	6.23434	6.36657	6.052	6.32865	6.01511	6.39387	6.32053	6.37781	6.13308	6.17472	6.46235	6.48845	6.15205	5.9317	6.19945	6.25556	1.01818	0.996609	1.01775	0.96746	1.01168	0.961563	1.02211	1.01039	1.01954	0.980421	0.987078	1.03306	1.03723	0.983454	0.948229	0.991031	0.0259992	-0.00490105	0.0253784	-0.0477259	0.0167599	-0.0565468	0.0315515	0.0149077	0.0279232	-0.0285261	-0.0187642	0.046921	0.052736
P42704	LRPPRC	Leucine-rich PPR motif-containing protein, mitochondrial	71	6.29681	6.12763	6.41694	6.25228	6.2348	6.05024	6.22567	6.25707	6.57781	6.20521	6.21449	6.34502	6.43661	6.2336	5.9589	6.16692	6.27341	1.00373	0.976761	1.02288	0.996631	0.993845	0.964425	0.992389	0.997395	1.04852	0.989128	0.990607	1.01141	1.02601	0.993653	0.949865	0.983024	0.00537013	-0.0339218	0.0326345	-0.00486861	-0.00890772	-0.0522586	-0.0110219	-0.00376376	0.0683563	-0.015771	-0.013615	0.0163737	0.0370501
P54727	RAD23B	UV excision repair protein RAD23 homolog B	71	6.18168	6.17796	6.12026	6.0729	6.31053	6.75078	6.26336	6.08226	6.41305	6.34232	6.32502	6.33401	6.00618	6.24793	6.08899	6.28276	6.1382	1.00708	1.00648	0.997077	0.989362	1.02808	1.0998	1.02039	0.990887	1.04478	1.03325	1.03044	1.0319	0.978492	1.01788	0.991983	1.02355	0.0101833	0.00931488	-0.00422271	-0.01543	0.0399455	0.137239	0.0291211	-0.0132082	0.063195	0.047195	0.0432544	0.0453035	-0.0313679
Q16881	TXNRD1	Thioredoxin reductase 1, cytoplasmic	71	6.31247	6.18019	6.2036	6.14481	6.33199	6.17724	6.44081	6.29246	6.34715	6.25728	6.17153	6.28761	6.18441	6.39407	6.07314	6.20124	6.21027	1.01646	0.995157	0.998926	0.98946	1.0196	0.994682	1.03712	1.01323	1.02204	1.00757	0.993762	1.01245	0.995836	1.0296	0.977919	0.998546	0.0235492	-0.00700422	-0.00154975	-0.015287	0.0280036	-0.00769303	0.0525867	0.0189687	0.0314535	0.0108803	-0.00902722	0.0178563	-0.00601945
P49591	SARS	Serine--tRNA ligase, cytoplasmic	71	6.05803	5.96722	6.29953	6.12791	6.41004	6.38337	6.3462	6.23646	6.18668	6.48279	6.2175	6.1705	6.18135	6.35108	6.42569	6.15566	6.11317	0.99098	0.976125	1.03048	1.00241	1.04856	1.0442	1.03812	1.02017	1.01202	1.06046	1.01707	1.00938	1.01115	1.03892	1.05112	1.00695	-0.0130726	-0.0348623	0.0433229	0.00347383	0.0684121	0.062397	0.0539717	0.0288061	0.0172441	0.0846936	0.0244133	0.0134661	0.0160007
P99999	CYCS	Cytochrome c	70	6.38212	6.16674	6.489	6.26698	6.22054	4.91404	6.29505	6.45587	7.02824	5.832	6.20923	6.52496	6.87251	6.5312	5.54883	6.26269	6.32621	1.00884	0.974792	1.02573	0.990637	0.983296	0.776775	0.995074	1.0205	1.11097	0.921879	0.981509	1.03142	1.08636	1.0324	0.877118	0.989959	0.0126943	-0.0368334	0.0366547	-0.0135711	-0.0243016	-0.364432	-0.00712361	0.0292701	0.151822	-0.117351	-0.0269271	0.0446276	0.119496
P62191	PSMC1	26S proteasome regulatory subunit 4	70	6.28178	6.22423	6.32891	6.06183	6.21271	6.15062	6.32902	6.28722	6.49205	6.29048	6.20348	6.21194	6.39385	6.21592	6.15331	6.16266	6.22419	1.00925	1.00001	1.01683	0.973915	0.998156	0.98818	1.01684	1.01013	1.04304	1.01065	0.996673	0.998032	1.02726	0.998672	0.988613	0.990115	0.0132879	9.85098e-06	0.0240715	-0.0381321	-0.00266281	-0.0171537	0.0240966	0.0145367	0.0607886	0.0152846	-0.00480776	-0.00284163	0.0387994
O60271	SPAG9	C-Jun-amino-terminal kinase-interacting protein 4	70	6.21208	6.32872	6.19415	6.39619	6.11964	6.13457	6.31324	6.36729	6.0376	6.32677	6.23016	6.11885	5.94239	6.2549	6.5059	6.51757	6.28279	0.988746	1.00731	0.985892	1.01805	0.974033	0.976409	1.00485	1.01345	0.960975	1.007	0.991624	0.973907	0.945821	0.995562	1.03551	1.03737	-0.0163278	0.0105095	-0.0204979	0.0258086	-0.0379574	-0.034442	0.00697639	0.0192753	-0.057429	0.0100649	-0.012135	-0.0381437	-0.0803609
P39019	RPS19	40S ribosomal protein S19	70	6.19505	6.24994	6.03348	6.23746	6.13864	7.10046	6.05977	6.14743	6.08764	6.54175	6.03548	5.98462	6.35316	6.49673	6.45069	5.8877	6.17898	1.0026	1.01148	0.976452	1.00946	0.993471	1.14913	0.980707	0.994894	0.985217	1.05871	0.976776	0.968545	1.02819	1.05142	1.04397	0.952859	0.00374664	0.0164731	-0.0343789	0.0135894	-0.00945022	0.200543	-0.0281063	-0.00738589	-0.0214862	0.0823073	-0.0339008	-0.0461096	0.0401051
P54819	AK2	Adenylate kinase 2, mitochondrial	70	6.18178	6.32282	5.79975	6.65392	6.04362	7.23488	6.07767	5.94629	6.12258	6.15412	5.97423	5.95227	6.17926	6.25949	6.74901	6.34833	6.23957	0.990739	1.01334	0.929512	1.06641	0.968596	1.15952	0.974053	0.952997	0.981251	0.986306	0.957475	0.953956	0.990335	1.00319	1.08165	1.01743	-0.0134237	0.0191221	-0.105455	0.0927585	-0.0460331	0.213523	-0.0379277	-0.0694562	-0.0273063	-0.0198935	-0.0626933	-0.0680061	-0.014012
P61289-2	PSME3	Isoform 2 of Proteasome activator complex subunit 3	70	6.31521	6.29353	6.24567	6.5536	6.41457	6.36222	6.1704	6.29564	5.90442	6.14423	6.26757	6.01223	6.05707	6.0287	6.44603	6.48892	6.352	0.994208	0.990795	0.98326	1.03174	1.00985	1.00161	0.97141	0.991127	0.929537	0.96729	0.986708	0.946509	0.953569	0.949102	1.0148	1.02156	-0.00838077	-0.013342	-0.0243551	0.0450761	0.0141411	0.00231878	-0.0418475	-0.0128584	-0.105416	-0.0479793	-0.0193053	-0.0793113	-0.0685914
O43242	PSMD3	26S proteasome non-ATPase regulatory subunit 3	69	6.32666	6.35885	6.04247	6.25997	6.32311	6.46787	5.88822	6.31333	5.97632	6.13116	6.25815	6.19703	6.67375	6.02703	6.41375	6.34233	6.24699	1.01275	1.01791	0.967261	1.00208	1.01219	1.03536	0.94257	1.01062	0.956672	0.981459	1.00179	0.992003	1.06831	0.96479	1.02669	1.01526	0.0182834	0.0256052	-0.0480222	0.0029951	0.0174737	0.05013	-0.0853291	0.0152405	-0.0639032	-0.0270006	0.0025756	-0.0115837	0.095337
O94979-8	SEC31A	Isoform 8 of Protein transport protein Sec31A	69	6.47774	6.28347	6.40896	6.01315	6.25685	6.04971	6.25458	6.20416	6.14806	6.19989	6.26717	6.43489	6.46979	6.20557	6.06586	6.26015	6.29583	1.02889	0.998037	1.01797	0.9551	0.993809	0.960907	0.993448	0.98544	0.976529	0.984761	0.995448	1.02209	1.02763	0.985664	0.963473	0.994333	0.041094	-0.00283509	0.0256937	-0.0662756	-0.00896007	-0.0575306	-0.00948358	-0.0211607	-0.0342653	-0.022154	-0.00658246	0.0315189	0.0393223
Q15046-2	KARS1	Isoform Mitochondrial of Lysine--tRNA ligase	69	6.40781	6.25092	6.24329	6.43553	6.29819	6.05449	6.02174	6.39152	6.17438	6.03872	6.28054	6.14348	6.43011	5.91036	6.37786	6.54106	6.33439	1.01159	0.986823	0.985619	1.01597	0.994286	0.955813	0.950643	1.00902	0.97474	0.953323	0.991499	0.969862	1.01511	0.933059	1.00686	1.03263	0.0166262	-0.0191366	-0.0208986	0.0228538	-0.00826785	-0.0651997	-0.0730247	0.0129539	-0.0369108	-0.0689623	-0.0123165	-0.044149	0.0216383
P43490	NAMPT	Nicotinamide phosphoribosyltransferase	69	6.3879	6.2552	6.21264	6.436	6.12473	5.67266	6.17746	6.18707	6.08492	6.22894	6.31055	6.0561	6.57116	6.27559	6.3498	6.66929	6.32294	1.01027	0.989287	0.982556	1.01788	0.968653	0.897156	0.976992	0.978512	0.962357	0.985134	0.998041	0.957799	1.03926	0.992512	1.00425	1.05478	0.0147473	-0.0155384	-0.0253879	0.0255699	-0.0459481	-0.156569	-0.0335806	-0.031338	-0.0553561	-0.0216077	-0.00282864	-0.0622054	0.0555537
Q9UGI8	TES	Testin	69	6.09569	6.12821	6.36907	6.18955	6.23723	6.33737	6.50662	6.1093	6.32266	6.48652	6.18208	6.26234	5.89983	6.5042	6.18165	6.18769	6.19563	0.983869	0.989118	1.02799	0.999019	1.00671	1.02288	1.0502	0.986066	1.0205	1.04695	0.997813	1.01077	0.952257	1.0498	0.997744	0.998718	-0.0234615	-0.0157853	0.0398317	-0.00141646	0.00965447	0.0326333	0.0706573	-0.0202439	0.0292807	0.0661937	-0.00315867	0.0154508	-0.0705776
P60174	TPI1	Triosephosphate isomerase	69	6.55206	6.21571	6.56376	6.02265	6.39344	5.13316	6.78929	6.37601	6.78044	5.68151	6.45811	6.60087	6.28196	6.17994	5.67982	6.29126	6.33854	1.03369	0.980621	1.03553	0.950163	1.00866	0.809833	1.07111	1.00591	1.06972	0.896343	1.01886	1.04139	0.991073	0.974978	0.896076	0.99254	0.0477969	-0.0282325	0.0503708	-0.0737533	0.0124407	-0.304304	0.099109	0.00850218	0.0972272	-0.157877	0.0269603	0.0585045	-0.012937
Q16543	CDC37	Hsp90 co-chaperone Cdc37	68	6.08355	6.11977	6.09571	6.32125	6.2306	6.29974	6.29113	6.44876	5.99778	6.23919	6.24764	6.02445	6.19174	6.34085	6.79922	6.26863	6.15507	0.98838	0.994265	0.990356	1.027	1.01227	1.0235	1.02211	1.04772	0.974445	1.01367	1.01504	0.978778	1.00596	1.03018	1.10465	1.01845	-0.0168618	-0.00829783	-0.013981	0.0384346	0.0175958	0.033517	0.0315439	0.0672465	-0.0373467	0.0195835	0.0215361	-0.0309457	0.00856963
P25786-2	PSMA1	Isoform Long of Proteasome subunit alpha type-1	68	6.15444	6.23295	6.11907	6.08539	6.27627	7.07789	6.12926	6.18894	6.10909	6.49789	6.21325	6.08558	6.08839	6.31265	6.30582	6.12311	6.14796	1.00105	1.01382	0.9953	0.989822	1.02087	1.15126	0.996958	1.00667	0.993677	1.05692	1.01062	0.989853	0.99031	1.02679	1.02568	0.995958	0.00151922	0.0198068	-0.00679596	-0.0147586	0.0297991	0.203211	-0.00439546	0.00958397	-0.00915087	0.079863	0.0152397	-0.0147136	-0.0140476
P30622-2	CLIP1	Isoform 3 of CAP-Gly domain-containing linker protein 1	68	6.14666	6.29269	6.24988	6.53019	6.21316	6.32095	6.1465	6.17728	6.1778	6.28078	6.20188	6.13838	6.24842	6.27381	6.35436	6.24725	6.30486	0.974909	0.998071	0.991281	1.03574	0.985456	1.00255	0.974884	0.979766	0.979848	0.996182	0.983667	0.973596	0.991049	0.995076	1.00785	0.990863	-0.0366605	-0.00278632	-0.0126347	0.0506618	-0.021136	0.00367821	-0.0366981	-0.0294915	-0.02937	-0.00551946	-0.0237576	-0.0386052	-0.0129718
P02545	LMNA	Prelamin-A/C	68	6.2097	6.33845	6.18193	6.02368	6.22736	6.19528	6.20671	6.28436	6.23912	6.1933	6.25896	6.18916	6.50209	6.44272	6.36753	6.13966	6.18844	1.00344	1.02424	0.998948	0.973376	1.00629	1.00111	1.00295	1.0155	1.00819	1.00079	1.0114	1.00012	1.05068	1.04109	1.02894	0.992118	0.00494779	0.0345543	-0.00151846	-0.0389306	0.00904491	0.00159371	0.00425296	0.0221901	0.0117668	0.00113255	0.0163472	0.000167842	0.0713277
P00367	GLUD1	Glutamate dehydrogenase 1, mitochondrial	68	6.29679	6.19551	6.27573	6.28743	6.25682	6.56739	6.26805	6.13917	5.94101	6.20528	6.2839	5.9104	6.07506	6.38709	6.52483	6.38555	6.26387	1.00526	0.989087	1.00189	1.00376	0.998875	1.04846	1.00067	0.980093	0.948458	0.990647	1.0032	0.943571	0.969858	1.01967	1.04166	1.01943	0.00756343	-0.0158301	0.00273017	0.00541731	-0.00162352	0.068267	0.000963568	-0.0290095	-0.0763449	-0.0135568	0.0046071	-0.0837973	-0.0441545
P16949	STMN1	Stathmin	68	5.86527	6.11276	5.95775	7.02639	6.02317	6.36072	6.15762	6.226	6.29154	6.31938	6.00134	6.07452	6.17317	6.62106	6.62035	6.16898	6.24054	0.939865	0.979524	0.954685	1.12593	0.965168	1.01926	0.986712	0.99767	1.00817	1.01263	0.96167	0.973396	0.989204	1.06098	1.06086	0.988533	-0.0894739	-0.0298475	-0.0669039	0.171112	-0.0511485	0.0275186	-0.0192986	-0.00336587	0.0117417	0.0181116	-0.0563868	-0.038901	-0.0156599
Q92878-2	RAD50	Isoform 2 of DNA repair protein RAD50	68	6.29391	6.20511	6.18141	6.20434	6.41703	6.51201	6.04851	6.23483	6.12437	6.44257	6.26305	6.09383	6.10065	6.26087	6.40404	6.21348	6.22119	1.01169	0.997415	0.993605	0.997291	1.03148	1.04675	0.972243	1.00219	0.984437	1.03558	1.00673	0.979528	0.980624	1.00638	1.02939	0.99876	0.0167654	-0.00373436	-0.00925519	-0.0039134	0.0447146	0.0659118	-0.0406114	0.00315908	-0.0226297	0.0504452	0.00967425	-0.0298419	-0.0282282
Q08378	GOLGA3	Golgin subfamily A member 3	67	6.30896	6.27648	6.29648	6.09619	6.21735	5.9799	6.39682	6.21126	6.23475	6.33773	6.26024	6.21447	6.3006	6.42603	6.14643	6.29631	6.24453	1.01032	1.00512	1.00832	0.976245	0.995648	0.957622	1.02439	0.994673	0.998434	1.01493	1.00252	0.995187	1.00898	1.02907	0.984291	1.00829	0.0148098	0.00736328	0.0119531	-0.0346845	-0.00629262	-0.0624711	0.0347625	-0.00770645	-0.0022607	0.0213738	0.00362555	-0.00696106	0.0128968
P09622	DLD	Dihydrolipoyl dehydrogenase, mitochondrial	67	6.21029	6.41621	6.17472	5.95858	6.28626	5.735	6.56531	6.2733	6.65075	6.27205	6.22864	6.33536	6.26803	6.3988	6.05041	6.1763	6.18995	1.00329	1.03655	0.99754	0.962622	1.01556	0.926502	1.06064	1.01347	1.07444	1.01326	1.00625	1.02349	1.01261	1.03374	0.977457	0.997795	0.00473288	0.0517936	-0.00355404	-0.0549592	0.0222742	-0.110134	0.0849354	0.0192968	0.103589	0.0190093	0.00898943	0.0334988	0.0180843
P08865	RPSA	40S ribosomal protein SA	67	6.14829	6.18593	6.41099	6.18448	6.10448	6.54455	6.31408	6.1765	6.25423	6.39051	6.35509	6.15781	5.93428	6.59061	6.1271	6.12109	6.23242	0.986501	0.99254	1.02865	0.992308	0.979471	1.05008	1.0131	0.991027	1.0035	1.02537	1.01968	0.988028	0.952163	1.05747	0.983101	0.982137	-0.0196078	-0.0108025	0.0407541	-0.0111407	-0.0299246	0.070501	0.0187795	-0.0130035	0.00503924	0.036138	0.0281195	-0.0173757	-0.07072
P46013	MKI67	Proliferation marker protein Ki-67	67	6.12483	6.05274	6.43641	6.41525	6.199	5.95119	6.34392	6.29725	6.2417	6.3545	6.32663	6.30297	6.34703	6.33323	6.15453	6.11883	6.25731	0.978828	0.967307	1.02862	1.02524	0.990682	0.951078	1.01384	1.00638	0.997506	1.01553	1.01108	1.0073	1.01434	1.01213	0.983575	0.977869	-0.0308722	-0.0479536	0.0407142	0.0359635	-0.0135065	-0.0723638	0.0198326	0.00917994	-0.00360299	0.0222366	0.0158952	0.0104898	0.0205397
Q9H4A4	RNPEP	Aminopeptidase B	67	6.25738	6.36366	6.2753	6.10594	6.23446	6.20784	6.34322	6.23428	6.2587	6.31529	6.17399	6.3036	6.39307	6.40342	6.01551	6.11432	6.25057	1.00109	1.01809	1.00396	0.976861	0.997423	0.993164	1.01482	0.997394	1.0013	1.01035	0.987748	1.00848	1.0228	1.02445	0.962394	0.978202	0.00157096	0.025869	0.00569667	-0.0337743	-0.00372315	-0.00989638	0.0212276	-0.00376481	0.00187527	0.0148612	-0.0177846	0.0121882	0.0325211
P22626	HNRNPA2B1	Heterogeneous nuclear ribonucleoproteins A2/B1	67	6.21064	6.02486	6.3597	6.62652	6.18274	5.87764	6.44358	6.07254	6.45257	6.36542	6.28511	6.18952	6.03311	6.31199	6.30612	6.25795	6.30543	0.984967	0.955503	1.00861	1.05092	0.980542	0.932155	1.02191	0.963065	1.02334	1.00951	0.996777	0.981617	0.956812	1.00104	1.00011	0.99247	-0.0218528	-0.065667	0.012364	0.0716567	-0.0283484	-0.101358	0.0312677	-0.0542947	0.0332791	0.0136609	-0.00465676	-0.0267672	-0.0636929
P61158	ACTR3	Actin-related protein 3	67	6.2874	6.19226	6.35376	6.46684	6.5534	6.25356	6.14595	6.2753	5.92494	6.23218	6.29966	6.21859	6.048	6.08045	6.21756	6.45015	6.32507	0.994045	0.979003	1.00454	1.02241	1.0361	0.988695	0.971682	0.992132	0.93674	0.985315	0.995983	0.983166	0.956196	0.961326	0.983003	1.01978	-0.00861676	-0.0306143	0.00653029	0.0319806	0.0511633	-0.0164026	-0.0414443	-0.0113959	-0.0942798	-0.0213434	-0.00580634	-0.0244928	-0.0646222
P09429	HMGB1	High mobility group protein B1	67	5.55849	5.9235	5.87479	6.25905	5.94438	8.25732	6.03778	6.00121	5.97656	6.70419	6.05147	6.37177	6.0935	6.67544	6.23206	6.03849	5.90396	0.941485	1.00331	0.99506	1.06014	1.00685	1.39861	1.02267	1.01647	1.0123	1.13554	1.02499	1.07924	1.0321	1.13067	1.05557	1.02279	-0.0869893	0.00476753	-0.00714505	0.0842614	0.00984401	0.483991	0.0323359	0.0235711	0.017633	0.183381	0.0356033	0.110012	0.0455888
P00492	HPRT1	Hypoxanthine-guanine phosphoribosyltransferase	67	6.35543	6.336	6.16547	6.24449	6.27518	6.37858	6.29071	6.17476	6.27702	6.14265	6.3337	6.35109	6.1742	5.96577	6.25939	6.27557	6.27535	1.01276	1.00967	0.982491	0.995083	0.999973	1.01645	1.00245	0.983971	1.00027	0.978854	1.0093	1.01207	0.983882	0.950668	0.997457	1.00004	0.0182944	0.013877	-0.0254845	-0.0071116	-3.85086e-05	0.0235399	0.0035275	-0.0233123	0.000384455	-0.0308342	0.0133532	0.0173089	-0.0234431
P53618	COPB1	Coatomer subunit beta	67	6.01002	5.92989	6.2792	6.18528	6.27753	6.60673	6.31195	6.35262	6.63899	6.30049	6.2505	6.41678	6.18087	6.27832	5.90159	6.07924	6.1011	0.985072	0.971938	1.02919	1.0138	1.02892	1.08288	1.03456	1.04123	1.08816	1.03268	1.02449	1.05174	1.01308	1.02905	0.9673	0.996417	-0.021699	-0.0410634	0.041512	0.0197701	0.0411282	0.114868	0.049017	0.0582829	0.121895	0.0463952	0.0349028	0.0727807	0.0187411
Q9Y5K6	CD2AP	CD2-associated protein	67	6.11425	6.08933	6.28997	6.19378	6.31405	6.61663	6.22984	6.10822	6.22771	6.39943	6.4107	6.23242	5.99176	6.30499	6.34338	6.13355	6.17183	0.99067	0.986632	1.01914	1.00356	1.02304	1.07207	1.0094	0.989693	1.00905	1.03688	1.0387	1.00982	0.970823	1.02158	1.0278	0.993797	-0.0135234	-0.0194154	0.0273542	0.00512123	0.0328668	0.100398	0.0134962	-0.0149469	0.0130029	0.0522445	0.054783	0.0140936	-0.0427191
O96008	TOMM40	Mitochondrial import receptor subunit TOM40 homolog	67	6.24852	6.13422	6.33672	6.23212	6.27423	5.87013	6.39867	6.19967	6.58269	6.27729	6.25118	6.47217	6.45078	6.25326	5.8854	6.13294	6.23789	1.0017	0.98338	1.01584	0.999074	1.00582	0.941043	1.02577	0.993872	1.05527	1.00632	1.00213	1.03756	1.03413	1.00246	0.943491	0.983175	0.00245525	-0.0241794	0.022677	-0.00133626	0.00837915	-0.0876668	0.0367128	-0.00886784	0.077618	0.00908259	0.00306928	0.0531902	0.0484143
P07954	FH	Fumarate hydratase, mitochondrial	66	6.16783	6.11888	6.1731	6.64993	6.5184	6.37858	5.94201	6.44563	6.13918	6.08542	6.16005	5.9353	6.32199	5.85317	6.71111	6.39943	6.27743	0.98254	0.974742	0.983379	1.05934	1.03839	1.01611	0.946567	1.02679	0.977976	0.969412	0.9813	0.945498	1.0071	0.932414	1.06908	1.01943	-0.0254122	-0.0369076	-0.02418	0.083164	0.0543427	0.0230601	-0.0792242	0.0381462	-0.0321292	-0.0448183	-0.0272331	-0.0808542	0.0102036
P53041	PPP5C	Serine/threonine-protein phosphatase 5	66	6.24357	6.03735	6.45186	6.01681	6.26755	5.75423	6.44007	6.25243	6.59692	6.19978	6.40715	6.43925	6.24931	6.42578	6.07435	6.14359	6.1874	1.00908	0.975749	1.04274	0.97243	1.01295	0.929992	1.04084	1.01051	1.06619	1.002	1.03552	1.0407	1.01001	1.03853	0.981729	0.99292	0.0130385	-0.0354173	0.0603824	-0.0403339	0.0185689	-0.10471	0.0577436	0.0150843	0.0924599	0.0028843	0.05035	0.0575599	0.0143642
Q9H4B7	TUBB1	Tubulin beta-1 chain	66	6.26264	6.05986	6.00042	5.91582	6.55142	6.95445	5.86359	6.26928	6.52024	6.251	6.22299	6.27905	6.50665	6.17834	6.2698	5.89445	6.05968	1.03349	1.00003	0.99022	0.976259	1.08115	1.14766	0.967639	1.03459	1.076	1.03157	1.02695	1.0362	1.07376	1.01958	1.03467	0.972732	0.0475281	4.16635e-05	-0.0141793	-0.0346646	0.112565	0.198694	-0.0474586	0.049057	0.105682	0.0448442	0.0383651	0.0513035	0.102672
Q13162	PRDX4	Peroxiredoxin-4	66	6.62956	7.1506	6.41421	6.07448	6.26103	5.444	6.57651	6.21387	6.06661	5.88633	6.268	6.53576	6.23955	5.89209	5.81764	6.52976	6.56721	1.00949	1.08883	0.976702	0.924971	0.953377	0.828967	1.00142	0.946196	0.923772	0.896321	0.954438	0.995211	0.950106	0.897198	0.885861	0.994297	0.013632	0.122783	-0.0340096	-0.11252	-0.0688811	-0.270614	0.00204104	-0.0797891	-0.114391	-0.157913	-0.067276	-0.00692613	-0.0738392
Q5VYK3	ECPAS	Proteasome adapter and scaffold protein ECM29	66	6.33255	6.03878	6.46145	6.18515	6.33612	5.69843	6.29427	6.33048	6.70684	6.11013	6.27423	6.47066	6.34204	6.13428	5.95628	6.3283	6.25448	1.01248	0.965512	1.03309	0.988915	1.01305	0.911095	1.00636	1.01215	1.07233	0.97692	1.00316	1.03456	1.014	0.980781	0.952322	1.0118	0.017896	-0.0506334	0.0469674	-0.0160819	0.0187091	-0.134326	0.00914855	0.0174244	0.100743	-0.0336874	0.0045479	0.0490224	0.0200565
P42285	MTREX	Exosome RNA helicase MTR4	66	6.12039	6.05592	6.35223	6.28803	6.32688	6.07703	6.27311	6.28623	6.23359	6.28501	6.28413	6.22484	6.29916	6.24347	6.27874	6.37127	6.20414	0.986501	0.976109	1.02387	1.01352	1.01978	0.979512	1.01112	1.01323	1.00475	1.01303	1.01289	1.00334	1.01532	1.00634	1.01202	1.02694	-0.0196082	-0.0348857	0.0340313	0.0193763	0.0282624	-0.0298654	0.015949	0.0189632	0.00683144	0.0186832	0.0184812	0.00480493	0.0219276
Q8NFC6	BOD1L1	Biorientation of chromosomes in cell division protein 1-like 1	65	6.10305	6.31484	6.21931	6.06781	6.30064	6.04279	6.34293	6.26663	6.28728	6.39904	6.33605	6.3226	6.00715	6.4751	6.26298	6.25178	6.17625	0.988148	1.02244	1.00697	0.982442	1.02014	0.978391	1.02699	1.01463	1.01798	1.03607	1.02587	1.0237	0.972621	1.04839	1.01404	1.01223	-0.0172013	0.0320144	0.0100228	-0.0255558	0.0287666	-0.0315169	0.0384177	0.0209581	0.0257043	0.0511237	0.036852	0.0337862	-0.040051
Q9NR09	BIRC6	Baculoviral IAP repeat-containing protein 6	65	6.10219	6.33096	6.36583	6.31535	6.41101	6.19032	6.14973	6.31418	6.24345	6.16563	6.33108	6.21585	6.22918	6.1582	6.26044	6.21659	6.27858	0.971906	1.00834	1.0139	1.00586	1.02109	0.985942	0.979477	1.00567	0.994404	0.98201	1.00836	0.990008	0.992132	0.980826	0.99711	0.990126	-0.0411118	0.0119854	0.0199097	0.00842381	0.0301128	-0.0204249	-0.0299158	0.00815651	-0.00809543	-0.0261906	0.0120127	-0.0144872	-0.0113966
P18124	RPL7	60S ribosomal protein L7	65	6.0019	6.28089	6.28427	5.97172	6.12316	6.61648	6.30716	6.12311	6.4336	6.54994	6.11261	6.07909	6.2762	6.70414	6.21561	5.92012	6.1347	0.978353	1.02383	1.02438	0.973434	0.99812	1.07853	1.02811	0.998112	1.04872	1.06769	0.9964	0.990936	1.02307	1.09282	1.01319	0.965023	-0.0315723	0.0339774	0.0347535	-0.0388451	-0.00271524	0.109072	0.0399989	-0.00272702	0.0686346	0.0944901	-0.0052031	-0.0131362	0.0328997
Q13423	NNT	NAD(P) transhydrogenase, mitochondrial	64	6.07089	6.03045	6.14276	6.32845	6.27779	6.47757	6.14508	6.22668	6.28819	6.30337	6.19899	5.99023	6.51247	6.31738	6.56594	6.12375	6.14314	0.988239	0.981656	0.999939	1.03017	1.02192	1.05444	1.00032	1.0136	1.02361	1.02608	1.00909	0.975109	1.06012	1.02836	1.06883	0.996844	-0.0170676	-0.02671	-8.86573e-05	0.0428765	0.0312811	0.076477	0.000456117	0.0194875	0.0336691	0.0371477	0.0130575	-0.0363643	0.0842291
P09972	ALDOC	Fructose-bisphosphate aldolase C	64	6.27336	6.0744	6.39282	6.15906	6.19188	5.65169	6.61711	6.20411	6.54986	6.20356	6.24779	6.33249	6.30045	6.59948	5.97314	6.22881	6.22491	1.00778	0.975821	1.02697	0.989422	0.994694	0.907915	1.063	0.996659	1.0522	0.99657	1.00368	1.01728	1.01214	1.06017	0.959554	1.00063	0.0111854	-0.0353111	0.0383995	-0.0153428	-0.00767547	-0.139371	0.0881483	-0.00482871	0.0734111	-0.00495661	0.00529298	0.0247199	0.0174019
P17980	PSMC3	26S proteasome regulatory subunit 6A	64	6.27733	6.16703	6.31259	7.36127	5.99645	5.7618	6.16203	6.33096	6.6207	6.08179	6.11123	6.0716	6.18454	5.99736	6.34664	6.21668	6.52956	0.961372	0.944479	0.966772	1.12738	0.918355	0.882418	0.943714	0.969585	1.01396	0.931425	0.935934	0.929864	0.947161	0.918494	0.971987	0.952083	-0.0568336	-0.0824088	-0.0487526	0.17297	-0.122876	-0.180465	-0.083579	-0.0445604	0.0199991	-0.102489	-0.0955219	-0.104908	-0.0783184
P31040	SDHA	Succinate dehydrogenase [ubiquinone] flavoprotein subunit, mitochondrial	64	6.39229	6.29832	6.20341	6.07435	6.30589	6.22693	6.25692	6.25582	6.22823	6.30994	6.24678	6.28817	6.27174	6.2987	6.03101	6.31149	6.24209	1.02406	1.00901	0.993803	0.973127	1.01022	0.997571	1.00238	1.0022	0.997779	1.01087	1.00075	1.00738	1.00475	1.00907	0.966184	1.01112	0.0343031	0.0129373	-0.00896826	-0.0392997	0.0146703	-0.00350868	0.00342292	0.00316927	-0.00320751	0.0155966	0.00108299	0.0106105	0.00683602
P49411	TUFM	Elongation factor Tu, mitochondrial	64	6.18618	5.97498	6.17191	6.20729	6.26377	6.12787	6.02215	6.12428	6.24391	6.06262	6.12869	6.1286	6.65226	6.36	6.67768	6.66781	6.13509	1.00833	0.973903	1.006	1.01177	1.02097	0.998823	0.981591	0.998238	1.01774	0.988188	0.998957	0.998942	1.0843	1.03666	1.08844	1.08683	0.0119643	-0.0381506	0.00863252	0.016879	0.0299467	-0.00169882	-0.0268059	-0.00254426	0.0253652	-0.0171431	-0.00150578	-0.00152696	0.11676
P62333	PSMC6	26S proteasome regulatory subunit 10B	64	6.15402	6.13308	6.36049	6.30398	6.19268	6.55749	6.08624	6.18712	6.22462	6.36558	6.12352	6.22404	6.3667	6.28608	6.28687	6.1475	6.23789	0.986554	0.983197	1.01965	1.01059	0.992752	1.05123	0.975689	0.991861	0.997872	1.02047	0.981665	0.997779	1.02065	1.00772	1.00785	0.985509	-0.0195296	-0.0244469	0.0280792	0.0152043	-0.0104948	0.072085	-0.0355075	-0.0117907	-0.00307292	0.0292333	-0.0266975	-0.00320736	0.0294871
Q9UBT2	UBA2	SUMO-activating enzyme subunit 2	64	6.29459	6.31372	5.98023	6.45883	6.26201	7.02823	5.91385	6.16597	5.66367	6.23203	6.19338	5.94334	6.20733	6.15142	6.80787	6.38354	6.26184	1.00523	1.00828	0.955027	1.03146	1.00003	1.12239	0.944427	0.984689	0.904473	0.995239	0.989067	0.949136	0.991294	0.982366	1.0872	1.01943	0.00752519	0.0119031	-0.0663863	0.0446856	3.85906e-05	0.166574	-0.0824896	-0.0222594	-0.14485	-0.00688504	-0.0158603	-0.0753133	-0.0126144
P62263	RPS14	40S ribosomal protein S14	64	6.07345	6.3174	6.19135	6.10602	6.32573	6.08464	6.27548	6.42225	6.46307	6.45178	6.30803	6.26134	6.3223	6.30054	6.11825	5.97837	6.17206	0.984024	1.02355	1.00313	0.989301	1.0249	0.985837	1.01676	1.04054	1.04715	1.04532	1.02203	1.01447	1.02434	1.02082	0.991282	0.968619	-0.0232347	0.03358	0.0045031	-0.0155186	0.0354811	-0.020579	0.0239749	0.0573279	0.0664687	0.0639463	0.0314386	0.0207205	0.0346986
O43719	HTATSF1	HIV Tat-specific factor 1	64	6.39024	6.22492	6.3669	6.40306	6.21961	5.90824	6.45608	6.27316	6.07506	6.22233	6.33681	6.17926	5.9248	6.20307	6.30411	6.51234	6.34628	1.00693	0.980877	1.00325	1.00895	0.98004	0.930977	1.0173	0.988478	0.957263	0.980469	0.998508	0.973682	0.933586	0.977434	0.993355	1.02617	0.00995894	-0.0278559	0.00467993	0.0128504	-0.0290871	-0.103183	0.0247473	-0.0167188	-0.0630125	-0.0284563	-0.00215442	-0.0384771	-0.0991447
P49589-3	CARS	Isoform 3 of Cysteine--tRNA ligase, cytoplasmic	64	6.35659	6.26805	6.36084	6.46876	6.18002	5.91616	6.40595	6.46311	6.0252	6.09425	6.26293	6.16923	5.76387	6.16862	6.22471	6.87171	6.36356	0.998905	0.984991	0.999573	1.01653	0.971158	0.929693	1.00666	1.01564	0.946829	0.957679	0.984187	0.969462	0.905762	0.969366	0.97818	1.07985	-0.00158105	-0.0218174	-0.000616788	0.0236551	-0.0422226	-0.105173	0.00957845	0.0223945	-0.078825	-0.0623854	-0.0229963	-0.0447437	-0.142796
O43852-3	CALU	Isoform 3 of Calumenin	64	6.09983	6.12036	6.1923	6.28592	6.15738	6.12956	6.40628	6.31762	6.21093	6.45431	6.32638	6.25979	5.9152	6.49606	6.23303	6.39506	6.1746	0.98789	0.991215	1.00287	1.01803	0.997211	0.992705	1.03752	1.02316	1.00588	1.0453	1.02458	1.0138	0.957989	1.05206	1.00946	1.0357	-0.0175772	-0.0127297	0.0041291	0.0257776	-0.00402966	-0.0105627	0.0531406	0.0330349	0.00846304	0.0639166	0.035034	0.019768	-0.0619193
P31350-2	RRM2	Isoform 2 of Ribonucleoside-diphosphate reductase subunit M2	63	6.39022	6.34821	6.19789	6.2568	6.39332	6.07647	6.13799	6.27067	6.25344	6.2008	6.25085	6.38086	6.41908	6.02099	6.28917	6.11325	6.29828	1.0146	1.00793	0.984061	0.993414	1.01509	0.964782	0.97455	0.995616	0.992881	0.984523	0.992469	1.01311	1.01918	0.955974	0.998554	0.970622	0.0209077	0.011392	-0.0231807	-0.00953291	0.0216074	-0.0517244	-0.0371916	-0.0063383	-0.0103079	-0.0225035	-0.0109055	0.018793	0.0274086
Q9C0C2	TNKS1BP1	182 kDa tankyrase-1-binding protein	63	6.25014	6.23313	6.31489	6.19432	6.26522	6.01583	6.37072	6.15066	6.41959	6.42169	6.30086	6.24551	6.05339	6.38206	6.10827	6.27373	6.24812	1.00032	0.997601	1.01069	0.991389	1.00274	0.962822	1.01962	0.984402	1.02744	1.02778	1.00844	0.999582	0.968834	1.02144	0.977617	1.0041	0.000466344	-0.00346536	0.0153354	-0.0124762	0.00394301	-0.0546584	0.0280343	-0.0226809	0.039059	0.0395309	0.0121266	-0.000602777	-0.0456789
O95831	AIFM1	Apoptosis-inducing factor 1, mitochondrial	63	6.24683	6.13687	6.18588	6.21759	6.2615	6.74424	6.19216	6.18459	6.12592	6.38172	6.16697	6.07384	6.33392	6.11359	6.45537	6.179	6.19679	1.00807	0.99033	0.998239	1.00336	1.01044	1.08834	0.999252	0.998031	0.988563	1.02984	0.995187	0.980159	1.02213	0.986573	1.04173	0.997129	0.0116026	-0.0140186	-0.00254281	0.00483383	0.0149866	0.122134	-0.00107891	-0.0028437	-0.0165951	0.0424237	-0.00695983	-0.0289128	0.031577
P08575	PTPRC	Receptor-type tyrosine-protein phosphatase C	63	6.29418	6.35145	6.16674	5.91978	6.44469	6.56999	6.28242	6.25834	6.10843	6.35211	6.20886	5.97747	6.2317	6.47567	6.26392	6.09425	6.18304	1.01798	1.02724	0.997364	0.957423	1.04232	1.06258	1.01607	1.01218	0.987934	1.02734	1.00418	0.966753	1.00787	1.04733	1.01308	0.98564	0.0257027	0.0387702	-0.00380773	-0.0627722	0.0597952	0.0875754	0.0230046	0.0174643	-0.0175141	0.0389201	0.00601265	-0.0487808	0.01131
Q01082	SPTBN1	Spectrin beta chain, non-erythrocytic 1	63	6.46204	6.24192	6.38526	6.26559	6.24137	6.07703	6.33382	6.293	6.21217	6.28611	6.16742	6.18872	6.26837	6.08745	6.19071	6.29903	6.3387	1.01946	0.984731	1.00734	0.988466	0.984645	0.958718	0.99923	0.99279	0.980038	0.991703	0.972978	0.976339	0.988904	0.960362	0.976653	0.993741	0.0278021	-0.0221977	0.0105578	-0.0167372	-0.0223248	-0.0608211	-0.00111169	-0.0104396	-0.0290902	-0.01202	-0.0395205	-0.0345465	-0.0160972
P78527	PRKDC	DNA-dependent protein kinase catalytic subunit	63	6.43553	6.04418	6.58542	6.33404	6.48384	5.90906	6.25631	6.13639	6.66266	6.16882	6.26755	6.34305	6.15625	6.07472	5.93523	6.20696	6.34979	1.0135	0.95187	1.03711	0.997519	1.02111	0.930591	0.985278	0.966392	1.04927	0.971499	0.987048	0.998938	0.96952	0.95668	0.934712	0.977506	0.0193495	-0.0711628	0.052566	-0.00358347	0.030139	-0.103781	-0.0213974	-0.0493193	0.0693888	-0.0417149	-0.0188078	-0.00153273	-0.0446576
P20290	BTF3	Transcription factor BTF3	63	6.21077	6.16728	6.19511	6.26794	6.29706	6.18856	6.0905	6.10951	6.01333	6.46603	6.48891	6.23464	6.2292	6.17479	6.59113	6.27525	6.21028	1.00008	0.993077	0.997558	1.00929	1.01397	0.996503	0.980713	0.983774	0.968287	1.04118	1.04487	1.00392	1.00305	0.994286	1.06133	1.01046	0.000114988	-0.0100228	-0.00352726	0.0133342	0.0200213	-0.0050534	-0.0280965	-0.0236005	-0.046493	0.058223	0.063319	0.0056491	0.00438974
Q99436	PSMB7	Proteasome subunit beta type-7	63	6.27027	6.2119	6.40508	5.99079	6.2111	5.92194	6.55718	6.25714	6.5067	6.30723	6.24971	6.28793	6.46768	6.3933	5.81846	6.14359	6.21951	1.00816	0.998776	1.02984	0.963225	0.998648	0.952155	1.05429	1.00605	1.04618	1.0141	1.00486	1.011	1.0399	1.02794	0.935517	0.987793	0.0117266	-0.00176632	0.0424157	-0.0540547	-0.00195213	-0.070731	0.0762746	0.00870246	0.0651251	0.0202056	0.00698832	0.0157842	0.0564474
Q92499	DDX1	ATP-dependent RNA helicase DDX1	63	6.2001	6.26953	6.2106	6.39822	6.47281	6.09859	6.17267	6.39026	6.2384	6.29192	6.28922	5.97873	6.06532	6.12513	6.45793	6.34057	6.26961	0.988913	0.999987	0.990588	1.02051	1.03241	0.972722	0.984538	1.01924	0.995022	1.00356	1.00313	0.953604	0.967415	0.976955	1.03004	1.01132	-0.0160848	-1.89841e-05	-0.0136436	0.0292943	0.0460159	-0.0399005	-0.0224816	0.0274984	-0.00720022	0.00512405	0.00450482	-0.0685372	-0.0477925
O60664-3	PLIN3	Isoform 3 of Perilipin-3	63	6.38376	6.34275	6.06082	6.65094	6.2919	6.43185	6.07558	6.27563	5.86216	6.13345	6.27976	6.02032	6.32234	5.94831	6.58477	6.33565	6.35957	1.0038	0.997356	0.953024	1.04582	0.98936	1.01137	0.955345	0.986801	0.921786	0.964445	0.987451	0.946656	0.994146	0.935332	1.03541	0.996239	0.00547776	-0.00382018	-0.0694157	0.0646296	-0.0154329	0.0163051	-0.0659065	-0.0191684	-0.117496	-0.0522299	-0.0182192	-0.0790885	-0.00847003
Q99598	TSNAX	Translin-associated protein X	63	6.25621	6.20195	5.98797	5.95168	6.32559	6.71407	6.16438	6.29529	6.26325	6.4099	6.32473	5.99566	6.17125	6.69633	6.2046	6.03713	6.09945	1.0257	1.0168	0.981723	0.975773	1.03708	1.10077	1.01064	1.03211	1.02685	1.0509	1.03693	0.982983	1.01177	1.09786	1.01724	0.989782	0.0366092	0.0240421	-0.0266128	-0.0353828	0.0525203	0.138508	0.015276	0.0455931	0.0382317	0.0716221	0.0523241	-0.0247612	0.016883
Q6P2E9	EDC4	Enhancer of mRNA-decapping protein 4	62	6.40583	6.30773	6.40759	6.25666	6.34749	6.20772	6.2634	6.19403	6.22375	6.22217	6.2255	6.09161	6.35484	6.02795	6.17955	6.28419	6.34445	1.00967	0.994212	1.00995	0.986162	1.00048	0.978448	0.987225	0.976291	0.980975	0.980726	0.981251	0.960147	1.00164	0.950114	0.974008	0.990502	0.0138898	-0.00837476	0.0142862	-0.020103	0.000690546	-0.0314322	-0.0185497	-0.0346173	-0.0277116	-0.0280779	-0.027306	-0.0586721	0.00236013
P22314	UBA1	Ubiquitin-like modifier-activating enzyme 1	62	6.34466	6.01646	6.39787	6.35282	6.40753	5.73752	6.27398	6.2608	6.42156	6.25012	6.25847	6.35714	6.39745	6.05792	6.16205	6.30365	6.27795	1.01063	0.958347	1.0191	1.01193	1.02064	0.913916	0.999367	0.997268	1.02287	0.995567	0.996897	1.01261	1.01903	0.964952	0.981538	1.00409	0.0152487	-0.0613792	0.0272976	0.017103	0.0294742	-0.129867	-0.000913183	-0.0039471	0.0326297	-0.00641022	-0.00448411	0.0180837	0.0272029
O75116	ROCK2	Rho-associated protein kinase 2	62	5.94696	5.85181	5.99416	5.98812	5.94921	5.60882	6.0667	6.03119	6.29524	6.27932	6.39352	6.29087	6.42516	6.81285	6.95381	7.11225	5.94526	1.00029	0.984281	1.00822	1.00721	1.00066	0.94341	1.02043	1.01445	1.05887	1.05619	1.0754	1.05813	1.08072	1.14593	1.16964	1.19629	0.000411862	-0.0228576	0.0118171	0.0103626	0.000957594	-0.0840432	0.0291715	0.0207022	0.0825209	0.0788678	0.10487	0.081519	0.111992
P68036-3	UBE2L3	Isoform 3 of Ubiquitin-conjugating enzyme E2 L3	62	6.12822	6.32624	6.12294	6.0592	6.32419	6.38795	6.3733	6.46108	6.12473	6.41544	6.17759	6.12795	6.04861	6.42453	6.1662	6.33184	6.15915	0.994978	1.02713	0.994121	0.983772	1.0268	1.03715	1.03477	1.04902	0.994412	1.04161	1.00299	0.994934	0.982053	1.04309	1.00114	1.02804	-0.00726317	0.038617	-0.00850672	-0.0236039	0.0381494	0.0526218	0.0493093	0.0690441	-0.00808502	0.058817	0.00431286	-0.00732674	-0.0261276
P28482	MAPK1	Mitogen-activated protein kinase 1	62	6.18737	6.34549	5.9061	7.17785	6.06161	6.10411	5.98668	6.46715	5.5105	5.8162	6.25878	5.69534	6.16304	6.25889	7.37896	6.68192	6.4042	0.966142	0.990832	0.922223	1.1208	0.946505	0.953141	0.934805	1.00983	0.860451	0.908185	0.977293	0.889313	0.962343	0.97731	1.15221	1.04336	-0.0496926	-0.0132874	-0.116813	0.164533	-0.0793179	-0.069238	-0.0972628	0.0141111	-0.216836	-0.138942	-0.0331375	-0.169237	-0.0553768
Q96QK1	VPS35	Vacuolar protein sorting-associated protein 35	62	6.42391	6.20311	6.31479	6.23057	6.39426	5.66676	6.36066	6.43136	6.35267	6.16878	6.25189	6.37724	6.32408	6.08843	6.06166	6.34983	6.2931	1.02079	0.985701	1.00345	0.990065	1.01608	0.900473	1.01074	1.02197	1.00947	0.980246	0.993452	1.01337	1.00492	0.967478	0.963224	1.00902	0.029682	-0.020778	0.00496504	-0.0144056	0.0230077	-0.151246	0.0154067	0.0313541	0.0135934	-0.0287845	-0.00947733	0.0191625	0.0070859
P12277	CKB	Creatine kinase B-type	62	6.02627	5.82149	6.34935	6.76116	6.29006	6.57222	6.2496	6.19448	6.50738	6.37072	6.08958	6.05779	6.06277	6.09279	6.36161	6.19274	6.23957	0.965815	0.932996	1.01759	1.08359	1.00809	1.05331	1.00161	0.992774	1.04292	1.02102	0.975962	0.970867	0.971665	0.976476	1.01956	0.992495	-0.0501807	-0.100058	0.0251629	0.115825	0.0116277	0.0749347	0.00231782	-0.0104629	0.0606308	0.0300104	-0.0351033	-0.0426545	-0.0414689
Q13838-2	DDX39B	Isoform 2 of Spliceosome RNA helicase DDX39B	62	6.369	6.12933	6.2761	6.08762	6.42253	6.08573	6.24847	6.20499	6.29854	6.31008	6.26912	6.25529	6.36039	6.20418	6.15735	6.32129	6.21551	1.02469	0.986134	1.00975	0.979424	1.03331	0.97912	1.0053	0.998307	1.01336	1.01521	1.00862	1.0064	1.02331	0.998177	0.990642	1.01702	0.0351935	-0.020144	0.013995	-0.029995	0.0472684	-0.030443	0.00762962	-0.00244447	0.0191441	0.0217849	0.0123896	0.00920342	0.0332419
P13693	TPT1	Translationally-controlled tumor protein	62	6.00193	6.11511	6.32658	6.04617	6.36905	6.3465	6.37433	6.17393	6.42526	6.50283	6.32743	6.24735	5.86852	6.46095	6.19618	6.21789	6.12245	0.980315	0.998802	1.03334	0.987541	1.04028	1.0366	1.04114	1.00841	1.04946	1.06213	1.03348	1.0204	0.958525	1.05529	1.01204	1.01559	-0.028682	-0.00173005	0.0473173	-0.018087	0.0569697	0.0518527	0.0581652	0.0120806	0.0696463	0.0869592	0.0475111	0.0291359	-0.0611118
P33176	KIF5B	Kinesin-1 heavy chain	61	6.21663	6.20785	6.33144	6.22695	6.20587	6.46185	6.39323	6.33081	6.19786	6.19594	6.1761	6.15201	5.98394	6.3262	6.29008	6.30324	6.24572	0.995343	0.993937	1.01373	0.996995	0.99362	1.0346	1.02362	1.01362	0.992338	0.99203	0.988854	0.984997	0.958087	1.01289	1.0071	1.00921	-0.0067346	-0.00877362	0.0196663	-0.00434162	-0.00923384	0.0490799	0.0336777	0.0195228	-0.0110971	-0.0115441	-0.0161712	-0.0218095	-0.0617716
P26640	VARS	Valine--tRNA ligase	61	6.42794	6.04205	6.43774	6.37727	6.33025	5.91267	6.32655	6.26157	6.48556	6.25548	6.09848	6.25939	6.39373	6.29385	5.87518	6.22232	6.32125	1.01688	0.955832	1.01843	1.00886	1.00142	0.935364	1.00084	0.990559	1.02599	0.989595	0.964759	0.990214	1.01147	0.995665	0.929433	0.98435	0.0241466	-0.0651718	0.0263444	0.0127291	0.0020526	-0.0964001	0.00120911	-0.0136854	0.0370213	-0.0150893	-0.0517602	-0.0141878	0.0164479
P62269	RPS18	40S ribosomal protein S18	61	6.29981	6.22497	6.24126	5.9457	6.43215	6.29569	6.29444	6.35501	6.23564	6.33295	6.16139	6.26113	6.45092	6.21959	6.03714	6.2122	6.17793	1.01973	1.00761	1.01025	0.962409	1.04115	1.01906	1.01886	1.02866	1.00934	1.02509	0.997322	1.01347	1.04419	1.00674	0.97721	1.00555	0.0281836	0.0109422	0.0147126	-0.055278	0.0581764	0.0272398	0.0269533	0.0407697	0.0134129	0.035753	-0.00386883	0.0192984	0.0623802
Q13620	CUL4B	Cullin-4B	61	6.22222	6.26122	6.18318	6.2378	6.29864	6.1952	6.21024	6.31409	6.1523	6.31512	6.23922	6.26119	6.32859	6.20383	6.29769	6.27948	6.22611	0.999376	1.00564	0.993106	1.00188	1.01165	0.995036	0.997452	1.01413	0.988146	1.0143	1.00211	1.00564	1.01646	0.996422	1.0115	1.00857	-0.000900502	0.00811389	-0.0099809	0.00270739	0.0167104	-0.00717905	-0.00368088	0.0202449	-0.0172041	0.0204802	0.00303577	0.00810697	0.0235542
Q8NC51	SERBP1	Plasminogen activator inhibitor 1 RNA-binding protein	61	5.84688	6.11611	6.18565	6.56143	6.03205	6.10597	6.31776	6.22252	6.18301	6.39527	6.16345	6.01489	6.11332	6.64218	6.89006	6.20944	6.17752	0.946477	0.99006	1.00132	1.06215	0.976452	0.988418	1.0227	1.00728	1.00089	1.03525	0.997723	0.973674	0.989608	1.07522	1.11534	1.00517	-0.0793602	-0.0144128	0.00189801	0.0869831	-0.0343788	-0.0168067	0.0323859	0.0104718	0.00128215	0.0499781	-0.00328906	-0.0384888	-0.0150711
Q93008	USP9X	Probable ubiquitin carboxyl-terminal hydrolase FAF-X	61	6.24357	6.1143	6.38316	6.24791	6.35228	6.07927	6.18616	6.23482	6.39569	6.16813	6.25329	6.36906	6.32268	6.19225	6.13739	6.32004	6.24724	0.999413	0.978721	1.02176	1.00011	1.01681	0.973114	0.990224	0.998013	1.02376	0.987338	1.00097	1.0195	1.01208	0.991199	0.982417	1.01165	-0.000846619	-0.0310305	0.031053	0.000155872	0.0240567	-0.0393197	-0.0141737	-0.00286989	0.0338822	-0.0183846	0.00139762	0.0278627	0.0173184
P52907	CAPZA1	F-actin-capping protein subunit alpha-1	61	5.99752	6.10268	6.43874	5.9431	6.14856	6.5063	6.45237	6.07849	6.4949	6.56516	6.31041	6.11714	6.25114	6.40869	6.0882	6.09661	6.12051	0.979905	0.997087	1.05199	0.971014	1.00458	1.06303	1.05422	0.993135	1.06117	1.07265	1.03103	0.999449	1.02134	1.04708	0.994721	0.996095	-0.0292858	-0.00420893	0.0731265	-0.0424362	0.0065967	0.0881855	0.0761773	-0.00993889	0.0856554	0.101178	0.0440819	-0.000794578	0.0304674
P11908-2	PRPS2	Isoform 2 of Ribose-phosphate pyrophosphokinase 2	61	6.60879	6.35811	6.13316	6.49092	6.54797	6.40822	6.00657	6.50719	5.57524	6.12316	6.18611	6.12464	6.48637	5.52688	6.335	6.58167	6.39774	1.03299	0.993805	0.958644	1.01456	1.02348	1.00164	0.938857	1.01711	0.871438	0.957081	0.96692	0.957312	1.01385	0.863879	0.990193	1.02875	0.0468227	-0.00896551	-0.0609329	0.0208595	0.0334842	0.00236019	-0.0910221	0.0244712	-0.19853	-0.0632871	-0.048531	-0.0629384	0.0198478
Q9Y277	VDAC3	Voltage-dependent anion-selective channel protein 3	60	6.11057	6.04894	6.46692	6.08783	6.29544	5.94961	6.40619	6.2946	6.56693	6.34678	6.14558	6.32809	6.67462	6.24608	5.96934	6.06247	6.17856	0.988995	0.97902	1.04667	0.985315	1.01892	0.962944	1.03684	1.01878	1.06286	1.02723	0.994661	1.0242	1.08029	1.01093	0.966137	0.98121	-0.0159648	-0.0305895	0.065807	-0.0213437	0.0270354	-0.0544767	0.0521948	0.0268429	0.0879473	0.038753	-0.00772263	0.0344983	0.111414
Q13435	SF3B2	Splicing factor 3B subunit 2	60	6.28939	6.19149	6.44202	6.28205	6.20044	6.22246	6.43618	6.15622	6.33601	6.3391	6.25771	6.1332	6.15315	6.29945	6.13256	6.12858	6.30124	0.99812	0.982583	1.02234	0.996955	0.984004	0.987498	1.02142	0.976986	1.00552	1.00601	0.993092	0.973333	0.976499	0.999716	0.973231	0.972599	-0.00271509	-0.0253485	0.031878	-0.00439976	-0.0232646	-0.0181501	0.0305695	-0.0335904	0.00793943	0.00864284	-0.0100004	-0.0389952	-0.03431
O43175	PHGDH	D-3-phosphoglycerate dehydrogenase	60	6.30546	6.11714	6.25618	6.26837	6.40804	6.13381	6.25253	6.22844	6.22325	6.22821	6.27409	6.168	6.45176	6.17925	6.2282	6.27728	6.23679	1.01101	0.980816	1.00311	1.00506	1.02746	0.983489	1.00252	0.998662	0.997829	0.998625	1.00598	0.988971	1.03447	0.990774	0.998623	1.00649	0.0157985	-0.0279458	0.00447892	0.00728724	0.03908	-0.0240196	0.00363697	-0.00193224	-0.0031349	-0.00198551	0.00860312	-0.0160003	0.0488897
P62979	RPS27A	Ubiquitin-40S ribosomal protein S27a	60	6.68182	6.41141	6.47186	6.30499	6.53762	4.04351	6.41586	6.66411	6.81061	5.38893	6.42454	6.71902	6.84454	6.18169	5.48582	6.61368	6.46752	1.03313	0.991324	1.00067	0.97487	1.01084	0.625203	0.992012	1.0304	1.05305	0.83323	0.993354	1.03889	1.05829	0.955805	0.848211	1.0226	0.0470285	-0.0125709	0.000967789	-0.0367185	0.0155529	-0.677604	-0.0115699	0.0431996	0.0745714	-0.263214	-0.00961945	0.0550382	0.081741
Q13177	PAK2	Serine/threonine-protein kinase PAK 2	60	6.23659	6.19321	6.18716	6.98145	6.15906	5.91565	6.26868	6.40802	5.90127	5.97004	6.42137	5.96854	6.19798	6.02586	6.73358	6.43154	6.3996	0.974528	0.967749	0.966804	1.09092	0.962413	0.924378	0.979542	1.00132	0.922131	0.932877	1.0034	0.932642	0.968495	0.941599	1.05219	1.00499	-0.0372249	-0.0472949	-0.048705	0.125544	-0.0552721	-0.113446	-0.0298206	0.00189635	-0.116957	-0.100242	0.00489883	-0.100604	-0.0461842
P04183	TK1	Thymidine kinase, cytosolic	60	6.30857	6.14184	6.27614	6.09105	6.41752	5.75249	6.48393	6.36366	6.53421	6.20769	6.15814	6.34751	6.4735	6.24665	6.06003	6.13708	6.2044	1.01679	0.989917	1.01156	0.981731	1.03435	0.927163	1.04505	1.02567	1.05316	1.00053	0.992544	1.02307	1.04337	1.00681	0.976731	0.98915	0.0240213	-0.0146208	0.0165858	-0.0266008	0.0487242	-0.109105	0.0635768	0.0365651	0.0747211	0.000764813	-0.010797	0.0328991	0.0612542
Q06203	PPAT	Amidophosphoribosyltransferase	60	6.38834	6.29459	6.20922	6.01328	6.42242	5.88944	6.40413	6.30207	6.31016	6.23853	6.31735	6.28627	6.30645	6.24274	5.95451	6.42052	6.22636	1.02602	1.01096	0.997248	0.965778	1.03149	0.945889	1.02855	1.01216	1.01346	1.00195	1.01461	1.00962	1.01286	1.00263	0.956339	1.03118	0.0370527	0.015724	-0.00397637	-0.0502363	0.0447286	-0.080258	0.0406142	0.0174374	0.0192882	0.00281771	0.0209311	0.0138158	0.0184397
P62701	RPS4X	40S ribosomal protein S4, X isoform	60	5.96341	5.98561	6.23481	6.67388	6.14047	6.63953	6.19793	6.04597	6.37916	6.45029	6.10073	5.98036	6.27085	6.40092	6.40576	6.13032	6.21443	0.959607	0.96318	1.00328	1.07393	0.988099	1.06841	0.997345	0.972893	1.02651	1.03795	0.981704	0.962335	1.00908	1.03001	1.03079	0.986466	-0.059484	-0.0541232	0.00472411	0.102904	-0.0172724	0.0954596	-0.00383503	-0.0396477	0.037745	0.0537425	-0.0266396	-0.0553892	0.0130395
Q9P258	RCC2	Protein RCC2	59	6.19605	6.11346	6.20743	6.23932	6.27173	6.39409	6.1917	6.22492	6.37124	6.27535	6.09609	6.15909	6.45112	6.22241	6.2891	6.29691	6.18906	1.00113	0.987784	1.00297	1.00812	1.01336	1.03313	1.00043	1.00579	1.02943	1.01394	0.984978	0.995157	1.04234	1.00539	1.01616	1.01743	0.00162731	-0.0177323	0.00427461	0.0116673	0.019142	0.0470176	0.000614098	0.00833382	0.0418527	0.0199745	-0.0218373	-0.00700426	0.0598282
P20810-6	CAST	Isoform 6 of Calpastatin	59	6.29834	6.06807	6.2966	6.41806	6.21944	6.11098	6.45517	6.18943	6.14919	6.28811	6.33346	6.28448	5.99446	6.35631	6.12862	6.40929	6.27027	1.00448	0.967753	1.0042	1.02357	0.991894	0.974596	1.02949	0.987108	0.98069	1.00285	1.01008	1.00227	0.956013	1.01372	0.97741	1.02217	0.00644465	-0.0472893	0.00604603	0.0336103	-0.0117423	-0.0371232	0.0419281	-0.0187204	-0.0281306	0.00409946	0.0144669	0.00326638	-0.0648972
Q5H9R7-5	PPP6R3	Isoform 5 of Serine/threonine-protein phosphatase 6 regulatory subunit 3	59	6.16422	6.08642	6.30106	6.15848	6.25198	6.71495	6.29493	6.16893	6.20987	6.36411	6.19392	6.27224	6.20065	6.3008	6.29182	6.02562	6.17755	0.997843	0.985249	1.01999	0.996914	1.01205	1.08699	1.019	0.998605	1.00523	1.0302	1.00265	1.01533	1.00374	1.01995	1.0185	0.975407	-0.00311526	-0.0214397	0.0285609	-0.0044593	0.0172795	0.120343	0.0271567	-0.00201334	0.00752945	0.0429252	0.00381913	0.0219471	0.00538584
F5GZS6	SLC3A2	4F2 cell-surface antigen heavy chain	59	6.12743	6.04357	6.43778	6.09083	6.25834	6.05275	6.44114	6.1817	6.5258	6.43532	6.27326	6.27339	6.48582	6.35068	5.9858	6.0364	6.1749	0.992312	0.978731	1.04257	0.986385	1.01351	0.980218	1.04312	1.0011	1.05683	1.04217	1.01593	1.01595	1.05035	1.02847	0.969376	0.97757	-0.0111343	-0.0310153	0.0601469	-0.0197775	0.0193637	-0.0288256	0.0608997	0.00158728	0.0797384	0.0595955	0.022799	0.0228289	0.0708726
Q14152	EIF3A	Eukaryotic translation initiation factor 3 subunit A	59	6.40149	6.15885	6.32251	6.60693	6.30398	6.23595	6.09599	6.24632	6.11421	6.24399	6.26148	6.15938	6.07575	5.92188	6.46548	6.38582	6.37245	1.00456	0.966481	0.992164	1.0368	0.989256	0.97858	0.956617	0.980208	0.959476	0.979842	0.982587	0.966565	0.953441	0.929295	1.0146	1.0021	0.00656073	-0.049186	-0.0113496	0.052133	-0.0155841	-0.0312377	-0.0639865	-0.0288405	-0.0596809	-0.0293788	-0.0253433	-0.0490619	-0.0687845
P63244	RACK1	Receptor of activated protein C kinase 1	59	6.46581	6.45391	6.11327	6.40448	6.39075	6.18097	6.12433	6.33044	5.95485	6.1527	6.21296	5.96548	6.21197	6.19585	6.37089	6.47134	6.35937	1.01674	1.01487	0.961302	1.00709	1.00493	0.971947	0.963041	0.995451	0.93639	0.967502	0.976978	0.938062	0.976822	0.974287	1.00181	1.01761	0.0239478	0.0212902	-0.056939	0.0101982	0.00710197	-0.04105	-0.0543313	-0.0065775	-0.0948181	-0.0476636	-0.0336025	-0.0922451	-0.0338324
O15067	PFAS	Phosphoribosylformylglycinamidine synthase	59	6.05406	6.07062	6.32886	6.23499	6.2877	6.36998	6.15164	6.27725	6.32674	6.33041	6.1823	6.19761	6.52442	6.11256	6.28232	6.26854	6.17213	0.98087	0.983553	1.02539	1.01018	1.01872	1.03205	0.99668	1.01703	1.02505	1.02564	1.00165	1.00413	1.05708	0.990348	1.01785	1.01562	-0.0278661	-0.0239252	0.0361766	0.0146182	0.0267634	0.0455198	-0.00479796	0.0243636	0.0356933	0.0365299	0.00237463	0.00594294	0.0800806
P33992	MCM5	DNA replication licensing factor MCM5	59	6.34578	6.21006	6.30463	6.23365	6.28463	5.85116	6.25534	6.2894	6.35176	6.24608	6.24192	6.3672	6.40488	6.17981	6.0765	6.35721	6.27353	1.01152	0.989883	1.00496	0.993643	1.00177	0.932674	0.997101	1.00253	1.01247	0.995624	0.994961	1.01493	1.02094	0.985061	0.968593	1.01334	0.0165201	-0.0146702	0.00713426	-0.0092003	0.00255036	-0.100555	-0.00418915	0.00364494	0.017879	-0.0063264	-0.00728758	0.0213816	0.0298941
P48637	GSS	Glutathione synthetase	59	6.45589	6.88138	5.90027	5.9515	6.53467	6.52276	5.97033	6.25161	6.19706	6.13025	6.2023	6.27267	6.0635	5.97122	6.42329	6.27132	6.29726	1.02519	1.09276	0.936958	0.945094	1.0377	1.03581	0.948084	0.992751	0.984088	0.973479	0.98492	0.996095	0.962879	0.948225	1.02001	0.995881	0.0358918	0.127974	-0.0939433	-0.0814709	0.0533901	0.0507583	-0.0769136	-0.0104965	-0.0231403	-0.0387783	-0.0219209	-0.00564457	-0.0545734
Q13085-4	ACACA	Isoform 4 of Acetyl-CoA carboxylase 1	59	6.43779	6.21396	6.59123	6.52785	6.42362	5.8419	6.11225	6.23598	6.35225	6.03569	6.16988	6.16648	6.35716	5.95294	6.23659	6.34443	6.44271	0.999237	0.964495	1.02305	1.01322	0.997037	0.906746	0.948708	0.967913	0.98596	0.936825	0.957653	0.957126	0.986722	0.923981	0.968008	0.984746	-0.00110158	-0.0521541	0.0328806	0.0189408	-0.00428055	-0.141229	-0.0759635	-0.0470508	-0.0203994	-0.0941484	-0.0624247	-0.0632199	-0.0192847
O14818	PSMA7	Proteasome subunit alpha type-7	59	5.74749	5.95433	6.07987	8.36685	6.02675	6.23439	5.93864	6.32862	6.48731	5.94606	5.89648	5.63169	6.02673	5.97152	7.35012	6.01315	6.53713	0.879206	0.910847	0.930051	1.2799	0.921925	0.953688	0.908447	0.968103	0.992378	0.909582	0.901998	0.861492	0.921922	0.913477	1.12436	0.919845	-0.185726	-0.134719	-0.104618	0.356026	-0.117278	-0.0684101	-0.138526	-0.0467675	-0.0110381	-0.136724	-0.148805	-0.215091	-0.117283
Q9UGP8	SEC63	Translocation protein SEC63 homolog	59	6.18551	5.91895	6.23194	6.13123	6.44212	6.40502	6.35165	6.23886	6.40172	6.2644	6.34966	6.38534	6.11802	6.22534	6.2316	6.11863	6.11691	1.01122	0.967638	1.01881	1.00234	1.05317	1.0471	1.03838	1.01994	1.04656	1.02411	1.03805	1.04388	1.00018	1.01773	1.01875	1.00028	0.0160901	-0.0474612	0.0268789	0.00337407	0.0747331	0.0664006	0.054329	0.02848	0.0656571	0.0343739	0.0538769	0.061961	0.000262363
Q13283	G3BP1	Ras GTPase-activating protein-binding protein 1	59	6.17992	6.02074	6.44306	6.0979	6.12551	6.047	6.37625	6.23408	6.41644	6.34243	6.26222	6.36071	6.571	6.21837	6.08077	6.22359	6.1854	0.999113	0.973378	1.04166	0.985853	0.990317	0.977624	1.03085	1.00787	1.03735	1.02539	1.01242	1.02834	1.06234	1.00533	0.983084	1.00617	-0.0012799	-0.0389272	0.058878	-0.0205556	-0.0140381	-0.0326485	0.0438401	0.0113086	0.052905	0.0361676	0.0178061	0.0403198	0.0872449
Q04837	SSBP1	Single-stranded DNA-binding protein, mitochondrial	59	6.36569	6.23014	6.42393	5.83533	6.32738	6.04811	6.3538	6.12779	6.49905	6.308	6.39248	6.39852	6.1022	6.25714	6.12214	6.20831	6.21377	1.02445	1.00263	1.03382	0.939096	1.01828	0.973339	1.02254	0.986163	1.04591	1.01516	1.02876	1.02973	0.982044	1.00698	0.985253	0.999121	0.0348475	0.00379516	0.0479868	-0.0906552	0.0261388	-0.038985	0.0321503	-0.0201026	0.0647594	0.0217132	0.0409063	0.0422688	-0.02614
P08670	VIM	Vimentin	59	6.22581	6.27309	6.18314	6.27838	6.232	6.97394	6.18969	6.20787	6.03046	6.40816	6.3363	6.12097	6.05478	6.06666	6.39726	6.02148	6.2401	0.997709	1.00529	0.990871	1.00613	0.998701	1.1176	0.991921	0.994834	0.966404	1.02693	1.01542	0.980908	0.970301	0.972205	1.02518	0.964965	-0.00330876	0.00760596	-0.0132306	0.00882205	-0.00187507	0.160404	-0.0117031	-0.00747196	-0.0493023	0.0383399	0.0220703	-0.02781	-0.0434958
P35232	PHB	Prohibitin	58	6.4418	6.39445	6.12468	6.60441	6.35509	6.26439	6.09913	6.26283	5.77057	6.18827	6.37847	6.02378	5.99689	6.13278	6.47228	6.49018	6.39133	1.0079	1.00049	0.958279	1.03334	0.994329	0.980138	0.954281	0.979894	0.902874	0.968228	0.997987	0.942492	0.938284	0.959546	1.01266	1.01547	0.0113466	0.000702967	-0.0614828	0.0473124	-0.00820475	-0.0289433	-0.0675138	-0.0293026	-0.147403	-0.0465812	-0.0029069	-0.0854482	-0.0919028
Q16401	PSMD5	26S proteasome non-ATPase regulatory subunit 5	58	6.18851	6.06587	6.27396	6.02367	6.36192	6.30206	6.28625	6.30209	6.18048	6.42569	6.3459	6.17363	6.31419	6.27353	6.34427	6.13799	6.138	1.00823	0.988248	1.02215	0.981373	1.03648	1.02673	1.02415	1.02673	1.00692	1.04687	1.03387	1.0058	1.0287	1.02208	1.0336	0.999998	0.0118229	-0.0170547	0.0316071	-0.0271265	0.051693	0.0380543	0.0344304	0.0380611	0.00994965	0.0660821	0.0480556	0.00834979	0.0408284
O95071	UBR5	E3 ubiquitin-protein ligase UBR5	58	6.17676	6.04062	6.66727	6.14562	6.24139	6.11026	6.64568	6.38843	6.5562	6.39393	6.21057	6.3248	6.01507	6.43551	5.73127	5.91662	6.25757	0.987086	0.96533	1.06547	0.98211	0.997415	0.976459	1.06202	1.02091	1.04772	1.02179	0.992489	1.01074	0.961247	1.02844	0.915894	0.945514	-0.0187517	-0.0509053	0.0914942	-0.0260434	-0.00373459	-0.0343682	0.0868149	0.0298595	0.0672579	0.031101	-0.0108763	0.0154179	-0.0570204
Q12888-2	TP53BP1	Isoform 2 of TP53-binding protein 1	58	6.17538	6.19787	6.4054	6.50005	6.16854	5.86105	6.46145	6.24336	6.29552	6.26518	6.30752	6.18087	6.21668	6.30848	6.13079	6.28185	6.31968	0.977167	0.980726	1.01356	1.02854	0.976085	0.927429	1.02243	0.987924	0.996178	0.991377	0.998077	0.978036	0.983702	0.998229	0.970112	0.994015	-0.0333225	-0.0280779	0.0194383	0.0406004	-0.0349213	-0.108691	0.0320076	-0.0175277	-0.00552482	-0.0124944	-0.00277749	-0.0320404	-0.023706
Q8N1G4	LRRC47	Leucine-rich repeat-containing protein 47	58	5.98767	6.03689	6.187	6.37192	6.2189	6.15277	6.07744	6.42544	6.33008	6.42008	6.19284	6.2754	6.64111	6.19102	6.25721	6.23424	6.14587	0.974259	0.982268	1.00669	1.03678	1.01188	1.00112	0.988866	1.04549	1.02997	1.04462	1.00764	1.02108	1.08058	1.00735	1.01812	1.01438	-0.0376225	-0.0258117	0.00962278	0.0521109	0.0170422	0.00161881	-0.0161535	0.064178	0.0426065	0.062974	0.0109839	0.0300902	0.111807
Q9Y6E2	BZW2	Basic leucine zipper and W2 domain-containing protein 2	58	6.29503	6.26356	6.10373	6.38311	6.45477	5.82896	6.06891	6.42216	6.18873	6.15355	6.31487	6.19596	6.48414	6.13151	6.36142	6.34959	6.26136	1.00538	1.00035	0.974825	1.01945	1.03089	0.930942	0.969264	1.02568	0.988401	0.982782	1.00855	0.989555	1.03558	0.979262	1.01598	1.01409	0.00773778	0.000507394	-0.0367843	0.027784	0.0438902	-0.103237	-0.045038	0.0365831	-0.0168321	-0.0250565	0.0122776	-0.0151476	0.0504398
Q9UQE7	SMC3	Structural maintenance of chromosomes protein 3	58	6.27785	6.23671	6.3954	6.15776	6.27044	5.83956	6.30665	6.25847	6.3387	6.26046	6.39874	6.17406	6.21851	6.33761	6.14579	6.38328	6.26693	1.00174	0.995178	1.0205	0.98258	1.00056	0.931806	1.00634	0.99865	1.01145	0.998968	1.02103	0.985181	0.992274	1.01128	0.98067	1.01857	0.00251168	-0.0069737	0.0292757	-0.0253532	0.000807803	-0.101899	0.00911499	-0.00194887	0.0164281	-0.00149021	0.030029	-0.0215394	-0.0111899
P10155	RO60	60 kDa SS-A/Ro ribonucleoprotein	58	6.37395	6.42133	5.94831	6.57715	6.33773	6.63408	6.01008	6.18587	5.62366	5.97952	6.37195	5.9418	6.37876	5.94527	6.75219	6.51834	6.33019	1.00691	1.0144	0.939674	1.03901	1.00119	1.04801	0.949432	0.977202	0.888388	0.944604	1.0066	0.938646	1.00767	0.939194	1.06667	1.02972	0.00994004	0.0206245	-0.0897678	0.0552149	0.00171854	0.0676487	-0.0748635	-0.0332711	-0.170738	-0.082218	0.00948728	-0.0913476	0.0110283
P60900	PSMA6	Proteasome subunit alpha type-6	58	6.33496	6.39347	6.26487	6.05904	6.29394	6.32831	6.32728	6.35954	6.1691	6.25105	6.05748	6.16114	6.48576	6.34008	5.94762	6.22635	6.26308	1.01148	1.02082	1.00029	0.967421	1.00493	1.01041	1.01025	1.0154	0.984994	0.998078	0.967172	0.983723	1.03555	1.01229	0.949631	0.994135	0.0164621	0.0297257	0.000411114	-0.0477842	0.00708997	0.0149468	0.014712	0.022049	-0.0218134	-0.00277492	-0.0481557	-0.0236761	0.0504022
P04792	HSPB1	Heat shock protein beta-1	58	6.26239	6.06198	6.2165	5.9783	6.10907	7.51257	6.33045	6.11092	6.16442	6.31024	6.17739	6.03944	6.18049	6.30526	6.13523	6.10534	6.12979	1.02163	0.988937	1.01415	0.975286	0.996619	1.22558	1.03273	0.996921	1.00565	1.02944	1.00776	0.98526	1.00827	1.02863	1.00089	0.996011	0.0308751	-0.0160491	0.0202643	-0.0361029	-0.00488547	0.293468	0.0464698	-0.00444864	0.00812692	0.0418566	0.0111592	-0.0214235	0.011883
Q14566	MCM6	DNA replication licensing factor MCM6	58	6.31146	6.27888	6.33691	6.19001	6.25068	6.14926	6.35162	6.28071	6.28408	6.35098	6.19753	6.22648	6.18668	6.09804	6.19854	6.30815	6.27932	1.00512	0.999931	1.00917	0.985778	0.99544	0.979288	1.01151	1.00022	1.00076	1.01141	0.986975	0.991586	0.985248	0.971131	0.987136	1.00459	0.00736659	-9.99463e-05	0.0131723	-0.0206654	-0.00659404	-0.0301944	0.0165174	0.000320471	0.00109436	0.016372	-0.0189138	-0.0121904	-0.0214418
P30566	ADSL	Adenylosuccinate lyase	57	6.22999	6.29259	6.0722	6.41096	6.13962	6.08823	6.28366	6.32009	6.14845	6.40049	6.32758	6.2522	6.0897	6.33327	6.33074	6.28023	6.25143	0.99657	1.00658	0.971329	1.02552	0.982114	0.973893	1.00515	1.01098	0.983526	1.02384	1.01218	1.00012	0.974128	1.01309	1.01269	1.00461	-0.00495755	0.00946655	-0.0419681	0.036353	-0.026038	-0.0381645	0.00741773	0.0157577	-0.0239646	0.033995	0.0174664	0.000176535	-0.0378162
A0AVT1	UBA6	Ubiquitin-like modifier-activating enzyme 6	57	6.24492	6.15427	6.30163	6.22749	6.25129	6.02831	6.19947	6.22846	6.42888	6.31536	6.31793	6.33209	6.2547	6.30345	6.14405	6.26771	6.23208	1.00206	0.987515	1.01116	0.999264	1.00308	0.967303	0.994768	0.99942	1.03158	1.01336	1.01378	1.01605	1.00363	1.01145	0.985875	1.00572	0.00296992	-0.0181254	0.0160119	-0.00106237	0.00444076	-0.0479596	-0.00756829	-0.000837676	0.0448542	0.0191518	0.0197388	0.0229686	0.00522751
P29692-2	EEF1D	Isoform 2 of Elongation factor 1-delta	57	6.09473	6.24468	6.2065	6.15242	6.11277	6.27948	6.53399	6.45154	6.46033	6.20448	6.01962	6.00781	6.09383	6.46482	6.40781	6.26519	6.17458	0.987068	1.01135	1.00517	0.996411	0.989989	1.01699	1.05821	1.04485	1.04628	1.00484	0.974903	0.97299	0.986922	1.04701	1.03777	1.01467	-0.0187793	0.0162861	0.00743834	-0.0051876	-0.0145153	0.0243035	0.0816227	0.063302	0.0652663	0.00696871	-0.0366692	-0.0395024	-0.0189923
P31930	UQCRC1	Cytochrome b-c1 complex subunit 1, mitochondrial	57	6.26923	6.12719	6.31911	5.91351	6.35498	6.23606	6.32829	6.16927	6.50657	6.45041	6.26527	6.26602	6.22927	6.36204	6.02419	6.17859	6.15726	1.01819	0.995116	1.02629	0.960413	1.03211	1.0128	1.02778	1.00195	1.05673	1.04761	1.01754	1.01766	1.0117	1.03326	0.978388	1.00346	0.0259998	-0.0070629	0.0374329	-0.0582738	0.0455991	0.0183463	0.0395272	0.0028113	0.0796087	0.0671024	0.0250882	0.0252609	0.0167746
O95163	ELP1	Elongator complex protein 1	57	6.53589	6.09071	6.75542	6.22303	6.35168	4.74805	6.93107	6.36045	6.80894	5.82383	6.17056	6.55313	6.73686	6.18624	5.3091	6.41504	6.40126	1.02103	0.951486	1.05533	0.972157	0.992254	0.741736	1.08277	0.993624	1.06369	0.909794	0.96396	1.02372	1.05243	0.966409	0.829383	1.00215	0.0300272	-0.0717461	0.077689	-0.0407393	-0.0112182	-0.431021	0.114722	-0.00922763	0.0890737	-0.136388	-0.052955	0.0338277	0.0737198
P15880	RPS2	40S ribosomal protein S2	57	6.21715	6.0995	6.30574	6.03272	6.11489	5.9936	6.35048	6.17233	6.33194	6.24508	6.31187	6.39792	6.39769	6.54344	6.25145	6.23421	6.16378	1.00866	0.989572	1.02303	0.978737	0.992069	0.972391	1.03029	1.00139	1.02728	1.01319	1.02403	1.03799	1.03795	1.0616	1.01422	1.01143	0.0124386	-0.0151238	0.0328509	-0.0310062	-0.0114882	-0.040392	0.0430509	0.00200041	0.0388328	0.0189053	0.0342527	0.0537882	0.0537363
Q14247	CTTN	Src substrate cortactin	57	6.16154	6.19726	6.13602	6.22954	6.17798	6.63733	5.99458	6.08154	5.8369	6.16709	6.01158	5.99047	7.2767	6.19357	6.56977	6.33813	6.18109	0.996837	1.00262	0.992708	1.00784	0.999497	1.07381	0.969826	0.983894	0.944316	0.997735	0.972576	0.969161	1.17725	1.00202	1.06288	1.02541	-0.00457029	0.00376922	-0.0105581	0.0112644	-0.000726071	0.102742	-0.0442026	-0.0234246	-0.0826589	-0.00327137	-0.0401171	-0.0451921	0.235423
Q06323	PSME1	Proteasome activator complex subunit 1	57	6.38797	6.30913	6.07815	6.22187	6.48146	6.35056	6.12366	6.22424	6.15391	6.13873	6.29261	6.25871	6.17613	5.99698	6.3609	6.44499	6.24928	1.02219	1.00958	0.972616	0.995614	1.03715	1.01621	0.979898	0.995993	0.984739	0.98231	1.00693	1.00151	0.988295	0.959627	1.01786	1.03132	0.0316676	0.0137511	-0.0400577	-0.00634173	0.0526288	0.0231938	-0.0292958	-0.00579229	-0.0221866	-0.0257498	0.00996855	0.00217535	-0.0169869
Q9UBE0	SAE1	SUMO-activating enzyme subunit 1	57	6.19321	6.10609	6.40282	6.29199	6.2937	6.00351	6.3888	6.26344	6.4314	6.33394	6.19237	6.13919	6.39669	6.3007	5.9747	6.28744	6.24853	0.991147	0.977205	1.02469	1.00696	1.00723	0.960788	1.02245	1.00239	1.02927	1.01367	0.991013	0.982502	1.02371	1.00835	0.956177	1.00623	-0.0128289	-0.0332674	0.0351912	0.0100001	0.0103922	-0.05771	0.0320287	0.00343898	0.0416166	0.019587	-0.0130246	-0.0254679	0.0338093
P52597	HNRNPF	Heterogeneous nuclear ribonucleoprotein F	57	6.26664	6.1091	6.3659	6.24313	6.2232	6.41946	6.38305	6.2873	6.3945	6.37675	6.23797	6.27528	6.08084	6.23103	6.02899	6.07688	6.24619	1.00327	0.978052	1.01916	0.99951	0.996319	1.02774	1.02191	1.00658	1.02374	1.0209	0.998684	1.00466	0.973527	0.997573	0.965226	0.972893	0.00471508	-0.0320172	0.0273875	-0.000707525	-0.00532042	0.0394749	0.0312689	0.00946357	0.0338545	0.0298443	-0.00190042	0.0067028	-0.0387064
Q9P0L0-2	VAPA	Isoform 2 of Vesicle-associated membrane protein-associated protein A	57	6.34811	6.04859	6.32346	6.14235	6.38997	5.79855	6.43406	6.206	6.4889	6.34357	6.44521	6.57407	5.9554	6.33946	5.95466	6.20765	6.21563	1.02131	0.973126	1.01735	0.988211	1.02805	0.932899	1.03514	0.998451	1.04397	1.02058	1.03694	1.05767	0.958133	1.01992	0.958014	0.998717	0.0304271	-0.0393012	0.0248141	-0.0171093	0.0399091	-0.100208	0.0498293	-0.00223635	0.0620739	0.0293949	0.0523273	0.0808868	-0.0617016
P30043	BLVRB	Flavin reductase (NADPH)	57	5.88409	5.75526	6.37021	6.21609	6.17527	5.88087	6.47514	6.37334	6.88674	6.64241	6.29296	6.49222	5.81601	6.54634	5.94349	6.24956	6.05641	0.971547	0.950275	1.05181	1.02637	1.01963	0.971015	1.06914	1.05233	1.1371	1.09676	1.03906	1.07196	0.960306	1.08089	0.981355	1.03189	-0.0416442	-0.0735824	0.0728775	0.0375439	0.0280387	-0.0424339	0.0964479	0.0735862	0.185358	0.133243	0.0552753	0.100248	-0.0584337
Q96C36	PYCR2	Pyrroline-5-carboxylate reductase 2	57	6.15093	6.18083	6.17449	6.55159	6.1441	6.37764	6.08431	6.08705	6.04273	6.16355	6.33256	6.35704	6.54723	6.40235	6.31088	6.09272	6.26446	0.981877	0.98665	0.985638	1.04583	0.980787	1.01807	0.971243	0.97168	0.964605	0.983892	1.01087	1.01478	1.04514	1.02201	1.00741	0.972585	-0.0263856	-0.0193896	-0.0208702	0.0646549	-0.0279885	0.0258325	-0.0420965	-0.0414469	-0.0519897	-0.0234286	0.0155987	0.021165	0.0636945
Q9UIA9	XPO7	Exportin-7	56	6.29372	6.16333	6.32286	6.14141	6.36435	6.10471	6.31046	6.28258	6.4887	6.278	6.30756	6.38382	6.09672	6.20108	6.06007	6.20063	6.23033	1.01017	0.989246	1.01485	0.985728	1.02151	0.979837	1.01286	1.00839	1.04147	1.00765	1.0124	1.02464	0.978555	0.995305	0.972672	0.995233	0.0146044	-0.0155985	0.0212687	-0.0207387	0.0307046	-0.0293858	0.0184366	0.0120486	0.0586209	0.0109964	0.0177734	0.0351114	-0.0312753
P61247	RPS3A	40S ribosomal protein S3a	56	6.22127	6.39295	6.05876	6.51152	6.21264	6.8148	6.04171	6.2466	5.75526	6.15698	6.1885	5.94336	6.26242	6.21602	6.65334	6.32387	6.29612	0.988111	1.01538	0.9623	1.03421	0.98674	1.08238	0.959592	0.992134	0.914096	0.9779	0.982906	0.943971	0.994647	0.987277	1.05674	1.00441	-0.0172551	0.0220176	-0.0554416	0.0485302	-0.0192577	0.114207	-0.0595072	-0.011393	-0.129583	-0.0322413	-0.0248744	-0.0831854	-0.00774392
P35998	PSMC2	26S proteasome regulatory subunit 7	56	6.32233	6.28268	6.19663	6.32728	6.23502	6.68377	6.17671	6.22844	6.00297	6.24032	6.36084	6.15357	5.91095	6.10149	6.44843	6.32858	6.28223	1.00638	1.00007	0.986374	1.00717	0.992485	1.06392	0.983203	0.991438	0.955548	0.993329	1.01251	0.97952	0.9409	0.97123	1.02646	1.00738	0.00917958	0.000103337	-0.0197929	0.0103087	-0.0108826	0.0893853	-0.0244382	-0.0124059	-0.0656003	-0.00965675	0.0179405	-0.0298531	-0.0878867
Q15459	SF3A1	Splicing factor 3A subunit 1	56	6.21115	6.15145	6.40508	6.15468	6.27741	5.68324	6.62953	6.34198	6.47471	6.27503	6.27857	6.33872	6.09677	6.30031	6.10745	6.27392	6.23059	0.99688	0.987298	1.02801	0.987817	1.00751	0.912151	1.06403	1.01788	1.03918	1.00713	1.0077	1.01735	0.978522	1.01119	0.980236	1.00695	-0.00450837	-0.0184423	0.0398478	-0.0176849	0.0108007	-0.132655	0.0895378	0.0255645	0.0554468	0.0102536	0.0110672	0.0248228	-0.0313237
A0A2R8Y521	CHD4	Chromodomain-helicase-DNA-binding protein 4	56	6.36358	6.25607	6.17593	6.47594	6.33176	6.08319	6.12567	6.19792	6.05977	6.28419	6.32032	6.28607	5.98625	6.02646	6.56679	6.46009	6.31788	1.00723	0.990217	0.977532	1.02502	1.0022	0.962853	0.969577	0.981013	0.959146	0.994668	1.00039	0.994965	0.947509	0.953874	1.0394	1.02251	0.0103981	-0.0141839	-0.0327841	0.0356491	0.00316604	-0.0546125	-0.0445729	-0.0276564	-0.0601775	-0.00771373	0.000557069	-0.0072822	-0.077788
Q93009	USP7	Ubiquitin carboxyl-terminal hydrolase 7	56	6.39425	6.28354	6.39927	6.34834	6.35635	5.92619	6.20653	6.35556	6.18137	6.23616	6.34223	6.13125	6.15654	6.16098	6.12465	6.39677	6.35635	1.00596	0.988545	1.00675	0.99874	1	0.932326	0.97643	0.999876	0.972472	0.981091	0.997779	0.964587	0.968565	0.969264	0.963548	1.00636	0.00857659	-0.016621	0.00970877	-0.00181917	-1.60171e-16	-0.101094	-0.0344117	-0.000179317	-0.0402719	-0.0275406	-0.00320837	-0.0520173	-0.0460788
P11171	EPB41	Protein 4.1	56	6.30643	6.18317	6.2006	6.36598	6.4113	6.26243	6.08892	6.29101	6.22331	6.17698	6.20937	6.08903	6.37568	6.08214	6.51658	6.21708	6.26404	1.00677	0.987089	0.989872	1.01627	1.02351	0.999742	0.972043	1.0043	0.993497	0.986101	0.991272	0.97206	1.01782	0.97096	1.04032	0.992502	0.00972897	-0.0187479	-0.0146868	0.023288	0.0335223	-0.000372004	-0.0409082	0.00619708	-0.00941246	-0.0201929	-0.0126477	-0.0408822	0.0254846
P08397	HMBS	Porphobilinogen deaminase	56	6.23253	6.32964	5.96182	6.36961	6.27519	6.43922	6.11218	6.18666	6.08182	6.325	6.20689	6.10871	6.21892	6.46095	6.34387	6.347	6.2234	1.00147	1.01707	0.957968	1.02349	1.00832	1.03468	0.982129	0.994096	0.97725	1.01633	0.997347	0.981571	0.99928	1.03817	1.01936	1.01986	0.00211495	0.0244205	-0.0619502	0.0335021	0.0119562	0.049183	-0.0260159	-0.00854223	-0.0331999	0.0233625	-0.0038324	-0.0268352	-0.00103892
O75874	IDH1	Isocitrate dehydrogenase [NADP] cytoplasmic	56	6.27151	6.14178	6.24589	6.11132	6.28599	6.48655	6.24142	6.3452	6.31317	6.36917	6.16569	6.23232	6.08558	6.27969	6.22518	6.19954	6.19262	1.01274	0.991789	1.0086	0.986871	1.01508	1.04746	1.00788	1.02464	1.01947	1.02851	0.99565	1.00641	0.982714	1.01406	1.00526	1.00112	0.0182618	-0.0118942	0.0123561	-0.0190671	0.0215889	0.0669003	0.0113232	0.0351146	0.0278135	0.0405543	-0.00628873	0.00921823	-0.0251563
P62906	RPL10A	60S ribosomal protein L10a	56	5.88114	6.26774	6.00021	6.38169	6.08284	7.92149	5.95565	6.15756	5.89819	6.50807	6.03152	5.88211	6.01494	6.3109	6.80206	5.90389	6.1327	0.958981	1.02202	0.978397	1.0406	0.991871	1.29168	0.971131	1.00405	0.961762	1.06121	0.983502	0.959139	0.980799	1.02906	1.10915	0.962691	-0.0604254	0.0314241	-0.0315082	0.0574173	-0.0117761	0.369251	-0.0422622	0.00583758	-0.0562489	0.0857086	-0.0239996	-0.0601874	-0.0279709
Q15637-5	SF1	Isoform 5 of Splicing factor 1	56	6.16012	6.11673	6.3527	6.18383	6.25231	6.27771	6.38731	6.08584	6.18377	6.51804	6.3379	6.17367	6.00599	6.42151	6.37222	6.17035	6.20334	0.993032	0.986037	1.02408	0.996854	1.00789	1.01199	1.02966	0.981058	0.996844	1.05073	1.02169	0.995216	0.968186	1.03517	1.02722	0.994681	-0.0100879	-0.0202858	0.0343235	-0.0045457	0.0113429	0.017192	0.0421621	-0.02759	-0.0045597	0.0713918	0.0309585	-0.00691799	-0.0466443
A5YKK6	CNOT1	CCR4-NOT transcription complex subunit 1	55	6.38509	6.3004	6.35167	6.37444	6.3523	5.957	6.2317	6.38553	6.21071	6.01466	6.30349	6.33343	6.18288	5.97058	6.24907	6.39706	6.3529	1.00507	0.991736	0.999806	1.00339	0.999906	0.937682	0.980922	1.00514	0.977618	0.946758	0.992222	0.996935	0.973237	0.93982	0.983656	1.00695	0.00729165	-0.0119719	-0.000279351	0.0048833	-0.000136262	-0.0928294	-0.0277895	0.00739106	-0.0326571	-0.0789321	-0.0112645	-0.00442828	-0.0391363
Q01813	PFKP	ATP-dependent 6-phosphofructokinase, platelet type	55	6.30152	6.25759	6.21572	6.15345	6.49784	6.46944	6.12997	6.25709	6.05203	6.34784	6.1683	6.11624	6.39929	6.17067	6.26444	6.19855	6.23207	1.01114	1.00409	0.997376	0.987385	1.04265	1.03809	0.983617	1.00401	0.971111	1.01858	0.989767	0.981414	1.02683	0.990148	1.00519	0.994621	0.0159884	0.0058957	-0.00378992	-0.0183159	0.0602488	0.0539294	-0.0238314	0.00578042	-0.0422923	0.0265543	-0.0148385	-0.0270664	0.0382004
P35606	COPB2	Coatomer subunit beta'	55	6.2693	6.23492	6.23906	6.17508	6.20234	6.62569	6.33626	6.19315	6.21493	6.24927	6.21544	6.22476	6.17286	6.18003	6.23341	6.23351	6.22959	1.00637	1.00086	1.00152	0.99125	0.995626	1.06358	1.01712	0.99415	0.997647	1.00316	0.997729	0.999225	0.990893	0.992044	1.00061	1.00063	0.00916715	0.00123383	0.00219147	-0.0126794	-0.0063246	0.0889335	0.0244943	-0.00846383	-0.00339907	0.00455046	-0.00328069	-0.001119	-0.0131981
P20618	PSMB1	Proteasome subunit beta type-1	55	6.20956	6.11984	6.27397	5.85922	6.45939	5.99275	6.27305	6.28934	6.87123	6.30888	6.29665	6.45184	6.67087	6.3125	5.77261	5.83829	6.11565	1.01536	1.00069	1.02589	0.95807	1.05621	0.979904	1.02574	1.0284	1.12355	1.0316	1.0296	1.05497	1.09079	1.03219	0.943908	0.954648	0.0219858	0.000988681	0.0368734	-0.0617966	0.0788927	-0.0292871	0.0366618	0.0404034	0.168063	0.0448787	0.0420792	0.0772054	0.12537
Q9P2E9	RRBP1	Ribosome-binding protein 1	55	6.24075	6.10765	6.37376	6.32486	6.00205	6.10352	6.4105	6.1555	6.2279	6.27851	6.44473	6.34285	6.24266	6.2041	6.35908	6.18158	6.26175	0.996646	0.975389	1.01789	1.01008	0.958525	0.97473	1.02375	0.983031	0.994593	1.00268	1.02922	1.01295	0.996951	0.990793	1.01554	0.987196	-0.00484764	-0.0359497	0.0255776	0.0144665	-0.0611117	-0.0369256	0.0338698	-0.024691	-0.00782128	0.00385516	0.0415529	0.0185642	-0.00440617
Q14978-3	NOLC1	Isoform 3 of Nucleolar and coiled-body phosphoprotein 1	55	6.08272	6.10533	6.15476	6.20254	6.26493	7.14552	6.3219	6.26274	6.06578	6.45368	6.09001	5.90412	6.13302	6.22973	6.51876	6.06446	6.13634	0.991262	0.994947	1.003	1.01079	1.02096	1.16446	1.03024	1.0206	0.988502	1.05172	0.99245	0.962157	0.999459	1.01522	1.06232	0.988287	-0.0126612	-0.00730856	0.00432477	0.0154813	0.0299206	0.219661	0.0429804	0.0294162	-0.0166847	0.0727442	-0.0109332	-0.0556558	-0.000780178
Q15233	NONO	Non-POU domain-containing octamer-binding protein	55	6.03457	6.13531	6.26896	6.22199	6.174	6.87749	6.24395	6.19687	6.07333	6.39536	6.19802	6.10741	6.17236	6.2437	6.39928	6.25741	6.16521	0.978811	0.995151	1.01683	1.00921	1.00143	1.11553	1.01277	1.00514	0.985097	1.03733	1.00532	0.990625	1.00116	1.01273	1.03797	1.01496	-0.0308985	-0.00701321	0.0240767	0.0132266	0.00205603	0.157733	0.0183095	0.00739025	-0.0216617	0.0528761	0.00765796	-0.0135888	0.00167276
O95433	AHSA1	Activator of 90 kDa heat shock protein ATPase homolog 1	55	6.45846	6.23913	6.272	6.11858	6.45979	5.97114	6.24349	6.3773	6.16534	6.3183	6.3182	6.19845	6.0255	6.113	6.3209	6.40042	6.27204	1.02972	0.994753	0.999993	0.975532	1.02993	0.952025	0.995448	1.01678	0.982988	1.00738	1.00736	0.988267	0.960692	0.974643	1.00779	1.02047	0.0422549	-0.00759047	-9.77588e-06	-0.0357385	0.0425519	-0.0709289	-0.00658264	0.0240104	-0.0247549	0.0106011	0.0105783	-0.0170278	-0.0578544
P14868	DARS	Aspartate--tRNA ligase, cytoplasmic	55	6.38869	6.20745	6.17903	6.46514	6.40782	6.2251	6.0498	6.27467	6.20082	6.23088	6.22487	6.15471	6.34409	6.07031	6.20023	6.37638	6.31008	1.01246	0.983736	0.979232	1.02457	1.01549	0.986533	0.958752	0.994389	0.982685	0.987449	0.986497	0.975378	1.00539	0.962002	0.982592	1.01051	0.0178624	-0.023657	-0.0302773	0.0350239	0.0221759	-0.0195607	-0.0607703	-0.00811814	-0.0251987	-0.0182218	-0.019614	-0.0359668	0.00775551
P14735	IDE	Insulin-degrading enzyme	55	6.36201	6.15172	6.18527	6.18462	6.30763	6.95165	6.06674	6.09607	6.24263	6.39945	6.11808	6.00791	6.21691	6.22019	6.28731	6.20181	6.2209	1.02268	0.988879	0.994272	0.994167	1.01394	1.11747	0.975218	0.979933	1.00349	1.0287	0.983471	0.965761	0.999358	0.999885	1.01067	0.996931	0.0323582	-0.0161346	-0.0082879	-0.00843952	0.0199736	0.160231	-0.036203	-0.029245	0.00502949	0.0408234	-0.0240455	-0.0502613	-0.000926781
P31939	ATIC	Bifunctional purine biosynthesis protein PURH	55	6.19557	6.01955	6.23093	6.37044	6.31434	6.05223	6.20668	6.31701	6.51102	6.17685	6.14389	6.22567	6.50714	6.23773	6.28815	6.20279	6.20412	0.998621	0.97025	1.00432	1.02681	1.01777	0.975517	1.00041	1.0182	1.04947	0.995604	0.990292	1.00347	1.04884	1.00542	1.01354	0.999785	-0.00199015	-0.0435715	0.00622034	0.0381658	0.0254048	-0.0357604	0.000594594	0.0260147	0.0696564	-0.00635588	-0.0140748	0.00500193	0.0687964
P12829	MYL4	Myosin light chain 4	55	6.60609	6.43557	6.03697	5.87322	6.24542	5.81039	6.36954	6.02904	6.48701	6.09503	6.40739	6.44135	6.16374	6.1143	6.3583	6.52665	6.23796	1.05901	1.03168	0.967779	0.941529	1.0012	0.931456	1.02109	0.966508	1.03992	0.977087	1.02716	1.0326	0.988101	0.980176	1.01929	1.04628	0.0827217	0.0449931	-0.0472502	-0.0869232	0.00172372	-0.10244	0.0301143	-0.0491466	0.0564788	-0.0334416	0.0386619	0.0462882	-0.0172689
O43847-2	NRDC	Isoform 2 of Nardilysin	55	6.29757	5.98921	6.33188	6.33834	6.48548	6.04001	6.18765	6.31464	6.39062	6.10681	6.28238	6.23226	6.30186	6.07996	6.26535	6.35598	6.23925	1.00935	0.959925	1.01485	1.01588	1.03946	0.968067	0.99173	1.01208	1.02426	0.978773	1.00691	0.99888	1.01003	0.97447	1.00418	1.01871	0.0134226	-0.0590069	0.0212613	0.0227324	0.0558407	-0.0468217	-0.011981	0.0173279	0.0345833	-0.0309537	0.00993859	-0.0016172	0.0144051
Q92890-1	UFD1	Isoform Long of Ubiquitin recognition factor in ER-associated degradation protein 1	55	6.20717	6.25454	6.25473	6.06937	6.43021	6.08345	6.30156	6.26967	6.16272	6.27648	6.32512	6.22133	6.42287	6.33503	6.13034	6.2554	6.19645	1.00173	1.00937	1.0094	0.979491	1.03772	0.981763	1.01696	1.01182	0.994556	1.01292	1.02076	1.00401	1.03654	1.02236	0.989331	1.00951	0.00249316	0.0134613	0.0135051	-0.0298957	0.0534234	-0.0265528	0.0242665	0.016947	-0.00787526	0.0185132	0.0296503	0.00578053	0.0517756
P48444	ARCN1	Coatomer subunit delta	55	6.27966	6.21244	6.30698	6.21758	6.30535	6.48815	6.20349	6.26422	6.15794	6.30345	6.26295	6.1075	6.05446	6.18687	6.47815	6.17081	6.25417	1.00408	0.993328	1.00844	0.99415	1.00818	1.03741	0.991897	1.00161	0.984614	1.00788	1.0014	0.976549	0.968068	0.98924	1.03581	0.986672	0.00586917	-0.00965727	0.0121321	-0.00846412	0.0117592	0.0529899	-0.0117372	0.0023176	-0.0223695	0.0113244	0.00202508	-0.0342353	-0.046819
Q16222	UAP1	UDP-N-acetylhexosamine pyrophosphorylase	55	6.19079	6.05782	6.4784	6.37404	6.31844	5.87319	6.309	6.34377	6.64117	6.04974	6.23217	6.29766	6.3815	6.18933	5.94561	6.31737	6.27526	0.986539	0.965349	1.03237	1.01574	1.00688	0.935927	1.00538	1.01092	1.05831	0.964062	0.993133	1.00357	1.01693	0.986306	0.947468	1.00671	-0.0195523	-0.0508771	0.0459617	0.0225323	0.0098926	-0.0955315	0.00773554	0.0156647	0.0817616	-0.0528027	-0.00994122	0.00514006	0.0242198
P55010	EIF5	Eukaryotic translation initiation factor 5	55	6.12343	6.29959	6.11766	6.55935	6.27454	6.6102	5.97107	6.0815	6.32807	6.51122	6.06505	5.96502	6.04915	6.20127	6.78429	6.05859	6.27501	0.975844	1.00392	0.974925	1.04531	0.999925	1.05342	0.951564	0.969162	1.00846	1.03764	0.966541	0.9506	0.964007	0.988249	1.08116	0.965511	-0.0352772	0.00564075	-0.0366373	0.0639357	-0.000107488	0.0750767	-0.0716277	-0.04519	0.0121484	0.0533107	-0.0490976	-0.0730902	-0.0528847
P12268	IMPDH2	Inosine-5'-monophosphate dehydrogenase 2	55	6.35665	6.23136	6.34721	6.45878	6.19423	5.88364	6.3764	6.49374	6.07997	6.06464	6.24217	6.09907	6.13749	5.99562	6.43665	6.60237	6.3485	1.00128	0.981548	0.999797	1.01737	0.9757	0.926776	1.00439	1.02288	0.957702	0.955287	0.983251	0.96071	0.966762	0.944415	1.01389	1.03999	0.0018509	-0.0268687	-0.000293182	0.0248459	-0.0354908	-0.109707	0.00632638	0.0326339	-0.0623516	-0.0659937	-0.0243681	-0.0578265	-0.048767
Q9NTZ6	RBM12	RNA-binding protein 12	55	6.1335	6.18752	6.46877	6.36583	6.15511	6.09404	6.36207	6.27476	6.39096	6.27153	6.25457	6.20805	6.42743	6.11716	6.13009	6.15861	6.2889	0.975289	0.983879	1.0286	1.01223	0.978725	0.969014	1.01163	0.997751	1.01623	0.997237	0.99454	0.987143	1.02203	0.972691	0.974747	0.979282	-0.0360983	-0.0234476	0.0406826	0.0175398	-0.0310242	-0.0454099	0.0166874	-0.00324856	0.0232238	-0.0039914	-0.00789814	-0.0186687	0.0314332
O75534-3	CSDE1	Isoform 3 of Cold shock domain-containing protein E1	55	6.3876	6.29614	6.18366	6.28207	6.29573	6.15607	6.11997	6.27357	6.14547	6.24319	6.48144	6.15422	6.29494	6.09016	6.32493	6.27083	6.28737	1.01594	1.0014	0.983505	0.999157	1.00133	0.979117	0.973376	0.997806	0.977431	0.992974	1.03087	0.978823	1.0012	0.968634	1.00597	0.99737	0.0228179	0.00201153	-0.0239951	-0.00121607	0.00191758	-0.0304465	-0.0389315	-0.00316944	-0.0329327	-0.0101727	0.0438583	-0.0308801	0.00173654
P40429	RPL13A	60S ribosomal protein L13a	55	6.35502	6.4363	5.98776	6.25204	6.5477	6.89279	6.02207	6.2592	5.98536	6.34289	6.14515	6.07795	6.31878	6.04201	6.26525	6.06973	6.25778	1.01554	1.02853	0.956851	0.999083	1.04633	1.10148	0.962333	1.00023	0.956467	1.0136	0.982002	0.971263	1.00975	0.96552	1.00119	0.969949	0.0222457	0.0405806	-0.0636345	-0.00132393	0.0653373	0.139437	-0.0553915	0.000327336	-0.0642129	0.0194894	-0.0262027	-0.0420661	0.0139951
O75821	EIF3G	Eukaryotic translation initiation factor 3 subunit G	55	6.08213	6.08556	6.28268	6.1483	6.22232	6.20794	6.48504	6.23137	6.17885	6.52792	6.40488	6.2095	5.86431	6.52952	6.26577	6.2739	6.14967	0.989018	0.989575	1.02163	0.999778	1.01181	1.00948	1.05454	1.01329	1.00475	1.06151	1.0415	1.00973	0.953598	1.06177	1.01888	1.0202	-0.0159318	-0.0151184	0.0308717	-0.000320847	0.0169442	0.0136062	0.0766071	0.019041	0.00682994	0.086115	0.0586631	0.0139687	-0.068547
P54105	CLNS1A	Methylosome subunit pICln	55	5.96478	6.02639	6.38078	6.10595	6.23256	6.04474	6.45059	6.34167	6.37781	6.36108	6.30438	6.44245	6.37732	6.39017	6.08945	6.10987	6.11947	0.974721	0.984789	1.0427	0.99779	1.01848	0.987787	1.05411	1.03631	1.04222	1.03948	1.03022	1.05278	1.04214	1.04424	0.995094	0.99843	-0.036939	-0.0221138	0.0603249	-0.00319211	0.026417	-0.0177276	0.0760232	0.0514549	0.0596532	0.0558638	0.0429466	0.0742015	0.0595424
P23193	TCEA1	Transcription elongation factor A protein 1	55	6.03571	6.13913	5.94799	6.6495	6.21001	6.67392	6.06134	6.26123	6.00313	6.39819	6.32516	5.96108	5.64456	6.45373	6.96857	6.26676	6.19308	0.974589	0.991288	0.960425	1.0737	1.00273	1.07764	0.978727	1.011	0.969328	1.03312	1.02133	0.962538	0.91143	1.04209	1.12522	1.0119	-0.0371342	-0.0126234	-0.0582554	0.102588	0.00393793	0.107877	-0.0310209	0.0157884	-0.0449428	0.0470062	0.0304443	-0.0550839	-0.133797
P06493	CDK1	Cyclin-dependent kinase 1	54	6.35195	6.188	6.36218	6.36615	6.33225	5.98167	6.30313	6.218	6.38789	6.05292	6.37481	6.19981	6.10662	6.2869	6.19781	6.28991	6.31707	1.00552	0.979568	1.00714	1.00777	1.0024	0.946906	0.997793	0.984317	1.01121	0.958185	1.00914	0.981438	0.966686	0.995224	0.981121	0.995701	0.007944	-0.0297824	0.0102656	0.0111656	0.00346266	-0.0787072	-0.00318714	-0.0228049	0.0160839	-0.0616243	0.0131268	-0.0270316	-0.0488815
Q96P70	IPO9	Importin-9	54	6.46963	6.35025	6.22774	6.12375	6.36498	5.85101	6.47829	6.44409	6.38513	6.01698	6.17638	6.42621	6.63136	6.11206	5.73615	6.20598	6.29284	1.02809	1.00912	0.989655	0.973129	1.01146	0.929788	1.02947	1.02403	1.01467	0.956162	0.981493	1.02119	1.05379	0.971272	0.911536	0.986197	0.0399714	0.0131016	-0.0150031	-0.0392964	0.0164441	-0.105026	0.0419012	0.0342648	0.0210042	-0.0646723	-0.0269503	0.0302563	0.0755929
O75390	CS	Citrate synthase, mitochondrial	54	6.24518	6.07278	6.19224	6.61523	6.20265	6.42755	6.22787	6.24034	6.09328	6.10831	6.21032	5.92932	6.29921	6.22739	6.70963	6.19869	6.28136	0.99424	0.966794	0.985812	1.05315	0.98747	1.02327	0.991485	0.99347	0.970058	0.972451	0.988691	0.943955	1.00284	0.991408	1.06818	0.986839	-0.00833323	-0.0487193	-0.020615	0.0747149	-0.0181917	0.0331925	-0.0123376	-0.00945175	-0.0438573	-0.0403031	-0.0164088	-0.0832097	0.00409453
O95373	IPO7	Importin-7	54	6.2071	6.01378	6.39177	6.19452	6.36145	5.98174	6.52566	6.32509	6.56767	6.11291	6.33889	6.363	6.45502	6.21181	5.81219	6.1374	6.20179	1.00086	0.969684	1.03063	0.998827	1.02574	0.964518	1.05222	1.01988	1.059	0.985668	1.02211	1.02599	1.04083	1.00162	0.937179	0.989617	0.00123413	-0.0444132	0.0435302	-0.00169276	0.0366704	-0.0521201	0.0734386	0.0284008	0.0826964	-0.0208259	0.031545	0.0370219	0.0577363
Q9UHD8	SEPTIN9	Septin-9	54	6.24123	6.13791	6.34447	6.09037	6.26675	5.7956	6.37834	6.22157	6.50377	6.38709	6.31575	6.30873	6.34349	6.32823	6.07184	6.26484	6.2035	1.00608	0.989428	1.02273	0.981764	1.0102	0.934248	1.02818	1.00291	1.0484	1.0296	1.0181	1.01696	1.02257	1.02011	0.978777	1.00989	0.00874913	-0.0153338	0.0324184	-0.0265514	0.0146362	-0.0981232	0.0400998	0.00419744	0.068195	0.0420775	0.0258728	0.0242684	0.0321955
P35241	RDX	Radixin	54	6.15792	6.11547	6.30893	7.14575	6.09746	5.82249	6.11561	6.15922	6.5278	6.12959	6.23698	6.05431	5.96143	6.14386	6.67516	6.34801	6.43202	0.957385	0.950786	0.980863	1.11097	0.947986	0.905235	0.950807	0.957588	1.01489	0.952981	0.969677	0.941277	0.926837	0.9552	1.0378	0.986939	-0.0628282	-0.072808	-0.027876	0.151814	-0.0770629	-0.143635	-0.0727749	-0.0625237	0.0213255	-0.0694808	-0.0444237	-0.0873088	-0.109613
P49736	MCM2	DNA replication licensing factor MCM2	54	6.11836	5.99284	6.32083	6.2158	6.30483	6.34615	6.21758	6.1412	6.51976	6.35293	6.26088	6.29039	6.4586	6.16647	6.19319	6.1002	6.16196	0.992925	0.972555	1.02578	1.00874	1.02319	1.02989	1.00903	0.996631	1.05807	1.03099	1.01605	1.02084	1.04814	1.00073	1.00507	0.989978	-0.0102437	-0.0401489	0.0367253	0.0125514	0.0330687	0.0424929	0.0129644	-0.00486814	0.0814301	0.0440334	0.0229767	0.0297607	0.0678327
P30153	PPP2R1A	Serine/threonine-protein phosphatase 2A 65 kDa regulatory subunit A alpha isoform	54	6.44939	6.44	6.07394	6.67764	6.31931	6.29384	5.96843	6.41167	5.63428	6.13799	6.23	5.99086	6.25448	5.88854	6.53926	6.69037	6.41024	1.00611	1.00464	0.947537	1.04171	0.985814	0.981841	0.931077	1.00022	0.87895	0.957529	0.971882	0.934576	0.975701	0.918614	1.02013	1.0437	0.00878378	0.00668175	-0.0777463	0.0589594	-0.0206119	-0.0264384	-0.103027	0.000321239	-0.186148	-0.0626126	-0.0411468	-0.0976158	-0.035489
P28074	PSMB5	Proteasome subunit beta type-5	54	6.33494	6.27286	6.22638	5.93207	5.96113	6.35066	6.44603	6.20744	6.48598	6.29736	6.28132	6.4882	6.44748	6.42421	5.76233	6.08161	6.19156	1.02316	1.01313	1.00562	0.958089	0.962783	1.0257	1.0411	1.00256	1.04755	1.01709	1.0145	1.04791	1.04133	1.03757	0.930675	0.982242	0.0330274	0.0188198	0.00809009	-0.0617679	-0.0547177	0.036603	0.0581074	0.00369488	0.067021	0.0244436	0.0207642	0.0675148	0.0584319
Q9H6Z4-2	RANBP3	Isoform 2 of Ran-binding protein 3	54	6.33402	6.37492	6.31005	6.20747	6.37024	6.07854	6.25799	6.24963	6.23043	6.35812	6.22771	6.2938	6.23495	6.201	6.05296	6.21818	6.30662	1.00435	1.01083	1.00054	0.984279	1.01009	0.963836	0.99229	0.990964	0.98792	1.00817	0.987489	0.997968	0.988637	0.983253	0.95978	0.985977	0.00625556	0.0155414	0.000785573	-0.0228605	0.0144819	-0.053141	-0.0111665	-0.0130951	-0.0175341	0.0117344	-0.0181641	-0.00293453	-0.0164879
Q5JSH3	WDR44	WD repeat-containing protein 44	54	6.36006	6.17891	6.51403	6.27813	6.20351	5.57277	6.55853	6.26119	6.34167	6.26483	6.4267	6.27588	6.20569	6.32649	5.99109	6.24051	6.33278	1.00431	0.975702	1.02862	0.99137	0.979587	0.879988	1.03565	0.988695	1.0014	0.98927	1.01483	0.991015	0.979931	0.999006	0.946044	0.985429	0.00620085	-0.0354872	0.0407108	-0.0125046	-0.0297548	-0.184445	0.050533	-0.0164026	0.00202328	-0.0155642	0.0212386	-0.0130218	-0.0292479
Q04760	GLO1	Lactoylglutathione lyase	54	6.59728	6.44509	6.26666	6.14218	6.56593	4.61623	6.32821	6.46656	6.69931	6.39212	6.27539	6.69704	6.60553	5.83321	5.84082	6.22844	6.3628	1.03685	1.01293	0.98489	0.965326	1.03192	0.725503	0.994563	1.01631	1.05289	1.00461	0.986262	1.05253	1.03815	0.916767	0.917963	0.978883	0.052209	0.0185382	-0.0219656	-0.0509115	0.045337	-0.462947	-0.00786487	0.0233361	0.0743502	0.00663215	-0.0199572	0.0738612	0.054012
P45974	USP5	Ubiquitin carboxyl-terminal hydrolase 5	54	6.47646	6.14185	6.44926	6.25041	6.40821	5.35415	6.51365	6.2807	6.45154	6.15965	6.35299	6.44248	6.17764	6.24895	5.97722	6.31482	6.32949	1.02322	0.970354	1.01892	0.987505	1.01244	0.845905	1.02909	0.992291	1.01928	0.973166	1.00371	1.01785	0.976008	0.987275	0.944344	0.997681	0.0331151	-0.0434171	0.0270432	-0.0181396	0.017831	-0.241433	0.0413758	-0.011165	0.0275532	-0.039242	0.00534535	0.0255258	-0.0350346
P62495	ETF1	Eukaryotic peptide chain release factor subunit 1	54	6.42116	6.15855	6.38944	6.18487	6.25268	5.99898	6.50144	6.2801	6.44012	6.02313	6.23872	6.37061	6.20926	6.20971	6.00922	6.31202	6.2885	1.02109	0.979335	1.01605	0.98352	0.994303	0.95396	1.03386	0.998663	1.02411	0.9578	0.992083	1.01306	0.987398	0.98747	0.955588	1.00374	0.0301169	-0.0301264	0.0229724	-0.0239738	-0.00824239	-0.0679999	0.0480422	-0.00192955	0.0343705	-0.0622037	-0.011467	0.0187144	-0.0182957
Q96G03	PGM2	Phosphoglucomutase-2	53	6.3242	6.19893	6.25295	6.11285	6.39511	6.05865	6.32029	6.23723	6.26271	6.38699	6.33811	6.20662	6.22002	6.28145	6.14973	6.25418	6.22223	1.01639	0.996255	1.00494	0.982421	1.02778	0.97371	1.01576	1.00241	1.00651	1.02648	1.01862	0.997491	0.999644	1.00952	0.988348	1.00513	0.0234507	-0.00541309	0.00710468	-0.0255871	0.0395369	-0.0384359	0.0225585	0.00347316	0.00935477	0.0377039	0.0266204	-0.00362448	-0.000513084
P22695	UQCRC2	Cytochrome b-c1 complex subunit 2, mitochondrial	53	6.0781	6.17453	6.08231	6.09092	6.31503	7.04575	6.02739	6.15175	6.21272	6.44166	6.18408	6.13146	6.56417	6.27223	6.39675	5.83117	6.10647	0.995355	1.01115	0.996044	0.997454	1.03415	1.15382	0.987051	1.00742	1.0174	1.05489	1.01271	1.00409	1.07495	1.02715	1.04754	0.954917	-0.00671704	0.0159919	-0.0057181	-0.0036773	0.0484521	0.206416	-0.018804	0.0106594	0.0248876	0.0770951	0.0182215	0.00589319	0.104275
P43686	PSMC4	26S proteasome regulatory subunit 6B	53	6.27877	6.38438	6.28755	6.07378	6.38084	6.21431	6.19758	6.28381	6.22196	6.34367	6.26262	6.14751	6.06984	6.28251	6.20781	6.36307	6.25612	1.00362	1.0205	1.00502	0.970854	1.01994	0.993317	0.990643	1.00443	0.99454	1.01399	1.00104	0.982639	0.970224	1.00422	0.992278	1.0171	0.00521378	0.0292783	0.00722978	-0.0426735	0.0284782	-0.00967397	-0.0135632	0.00637137	-0.00789907	0.0200495	0.00149816	-0.025266	-0.0436097
O43390	HNRNPR	Heterogeneous nuclear ribonucleoprotein R	53	6.39697	6.26889	6.3565	6.17345	6.22859	6.12144	6.22945	6.35486	6.19886	6.26662	6.39379	6.14981	6.19056	6.04084	6.26191	6.36748	6.29895	1.01556	0.995227	1.00914	0.980076	0.988829	0.971819	0.988966	1.00888	0.98411	0.994867	1.01506	0.976323	0.982792	0.959023	0.994119	1.01088	0.0222768	-0.00690192	0.0131207	-0.029035	-0.0162063	-0.0412409	-0.0160071	0.0127484	-0.023109	-0.00742442	0.0215594	-0.0345701	-0.025042
P48147	PREP	Prolyl endopeptidase	53	6.33671	6.1309	6.51162	6.39761	6.30271	6.08878	6.34589	6.32667	6.2051	6.18571	6.17615	6.06128	6.43662	6.0136	6.136	6.34464	6.34421	0.998818	0.966377	1.02639	1.00842	0.993459	0.959738	1.00026	0.997235	0.978073	0.975017	0.97351	0.955403	1.01457	0.947888	0.967181	1.00007	-0.00170653	-0.0493417	0.037576	0.0120925	-0.00946824	-0.0592873	0.000381987	-0.00399418	-0.0319861	-0.0365013	-0.0387327	-0.065818	0.0208628
O75083	WDR1	WD repeat-containing protein 1	53	6.2719	6.23213	6.14342	6.32582	6.51409	6.28293	6.0627	6.35651	6.01649	6.18964	6.14309	6.06445	6.41392	6.0463	6.50088	6.43573	6.24332	1.00458	0.998208	0.983999	1.01321	1.04337	1.00634	0.97107	1.01813	0.963669	0.991402	0.983946	0.971351	1.02733	0.968443	1.04125	1.03082	0.00658972	-0.00258751	-0.0232708	0.0189397	0.0612508	0.00912467	-0.0423524	0.025922	-0.0533908	-0.0124573	-0.0233483	-0.041936	0.0388935
Q13618	CUL3	Cullin-3	53	6.21041	6.33502	6.25037	6.37942	6.29699	6.04046	6.22876	6.42389	5.98446	6.29065	6.25703	6.18954	6.24522	6.31426	6.16996	6.38358	6.2938	0.98675	1.00655	0.993099	1.0136	1.00051	0.959747	0.989665	1.02067	0.950849	0.999499	0.994157	0.983434	0.992281	1.00325	0.980323	1.01426	-0.019244	0.00941669	-0.00999089	0.0194928	0.000729896	-0.0592741	-0.0149875	0.0295147	-0.0727114	-0.000723385	-0.00845446	-0.0241003	-0.0111801
Q9UNM6	PSMD13	26S proteasome non-ATPase regulatory subunit 13	53	6.35535	6.28743	6.27622	6.5194	6.41638	6.16525	6.06926	6.44721	5.93774	5.93258	6.18741	6.20719	6.33465	6.04022	6.29313	6.53059	6.3596	0.999332	0.988652	0.986889	1.02513	1.00893	0.96944	0.954346	1.01378	0.933666	0.932854	0.972924	0.976035	0.996077	0.94978	0.989548	1.02689	-0.000964448	-0.0164656	-0.0190401	0.0358032	0.0128236	-0.0447766	-0.0674154	0.0197389	-0.0990221	-0.100276	-0.0396004	-0.0349957	-0.00567112
P09960	LTA4H	Leukotriene A-4 hydrolase	53	6.39328	6.44056	6.20798	6.032	6.3912	5.94972	6.30701	6.39441	6.13811	6.24638	6.15905	6.23294	6.55393	6.27638	6.06981	6.20724	6.26845	1.01991	1.02746	0.990352	0.962279	1.01958	0.949153	1.00615	1.02009	0.979206	0.996478	0.982547	0.994334	1.04554	1.00126	0.96831	0.990234	0.0284464	0.0390762	-0.013986	-0.0554735	0.0279769	-0.0752881	0.00884632	0.0287013	-0.0303154	-0.00508956	-0.0254021	-0.00819708	0.0642504
O00267	SUPT5H	Transcription elongation factor SPT5	53	5.89841	6.10148	6.2703	5.94551	6.16616	6.98966	6.18777	6.27353	6.38477	6.60137	6.12852	6.18597	6.22317	6.40059	6.3412	5.90158	6.05392	0.974312	1.00786	1.03574	0.982092	1.01854	1.15457	1.02211	1.03627	1.05465	1.09043	1.01232	1.02181	1.02796	1.05726	1.04745	0.974835	-0.0375447	0.0112884	0.0506637	-0.0260702	0.0265015	0.207351	0.0315488	0.0514066	0.0767638	0.124895	0.0176679	0.031129	0.0397789
Q15185	PTGES3	Prostaglandin E synthase 3	53	6.05298	6.32481	6.06701	6.06604	6.08952	6.41341	6.27748	6.36405	6.35788	6.38486	6.17587	6.16302	6.16272	6.52533	6.49701	6.07803	6.12771	0.987805	1.03217	0.990094	0.989936	0.993768	1.04662	1.02444	1.03857	1.03756	1.04197	1.00786	1.00576	1.00571	1.06489	1.06027	0.991893	-0.0177024	0.0456741	-0.0143623	-0.014593	-0.00901951	0.0657436	0.0348375	0.0545971	0.0531978	0.059307	0.0112944	0.00828945	0.00821922
Q86UE4	MTDH	Protein LYRIC	53	6.19938	6.24297	6.26058	6.15436	6.15805	5.99232	6.53858	6.26231	6.28671	6.35106	6.2904	6.2375	6.08051	6.63673	6.14214	6.16641	6.21432	0.997595	1.00461	1.00744	0.990351	0.990945	0.964276	1.05218	1.00772	1.01165	1.022	1.01224	1.00373	0.978467	1.06797	0.988384	0.99229	-0.00347318	0.00663542	0.0106992	-0.0139883	-0.0131235	-0.0524824	0.0733802	0.0110978	0.0167081	0.0314003	0.0175546	0.0053708	-0.0314048
P27694	RPA1	Replication protein A 70 kDa DNA-binding subunit	52	5.98363	6.04686	6.25661	6.18042	6.2179	6.47947	6.5596	6.15991	6.24222	6.48011	6.28998	6.13573	6.04781	6.459	6.27303	6.18772	6.11688	0.978216	0.988553	1.02284	1.01039	1.01651	1.05928	1.07238	1.00703	1.02049	1.05938	1.0283	1.00308	0.988708	1.05593	1.02553	1.01158	-0.031775	-0.0166098	0.0325852	0.0149089	0.0236314	0.0830798	0.100812	0.0101133	0.0292632	0.0832223	0.0402595	0.00443903	-0.0163832
P33316	DUT	Deoxyuridine 5'-triphosphate nucleotidohydrolase, mitochondrial	52	6.31883	6.27079	5.76879	5.75252	6.25884	6.60006	6.16228	6.21492	5.989	6.14297	6.26384	6.27726	6.14766	6.74118	6.67918	6.41187	6.02773	1.04829	1.04032	0.957041	0.954342	1.03834	1.09495	1.02232	1.03105	0.993574	1.01912	1.03917	1.0414	1.0199	1.11836	1.10808	1.06373	0.0680421	0.0570318	-0.0633466	-0.0674213	0.0542799	0.130864	0.0318488	0.0441204	-0.00930026	0.0273209	0.055432	0.0585196	0.028422
O14744	PRMT5	Protein arginine N-methyltransferase 5	52	6.16819	6.14974	6.41913	5.94284	6.17825	6.24505	6.39291	6.25759	6.49584	6.26942	6.14097	6.32112	6.46845	6.37186	6.00359	6.17505	6.16997	0.999711	0.99672	1.04038	0.963187	1.00134	1.01217	1.03613	1.0142	1.05281	1.01612	0.995299	1.0245	1.04838	1.03272	0.973033	1.00082	-0.000417438	-0.00473923	0.0571131	-0.0541121	0.00193361	0.0174485	0.0512081	0.0203425	0.0742515	0.0230673	-0.00679809	0.0349156	0.0681554
P06132	UROD	Uroporphyrinogen decarboxylase	52	5.99018	6.0266	6.25658	6.35197	6.0006	6.06829	6.50214	6.34611	6.43465	6.23096	6.15511	6.26069	6.4267	6.281	6.40628	6.26215	6.15633	0.973011	0.978927	1.01628	1.03178	0.974704	0.985699	1.05617	1.03083	1.04521	1.01212	0.999801	1.01695	1.04392	1.02025	1.0406	1.01719	-0.0394718	-0.0307268	0.0233031	0.0451329	-0.0369644	-0.0207811	0.0788435	0.0438014	0.0637905	0.0173833	-0.000286513	0.0242505	0.062007
P24534	EEF1B2	Elongation factor 1-beta	52	6.27505	6.21341	6.18515	6.34262	6.27185	6.09083	6.47028	6.30831	6.10123	6.2003	6.11351	6.18754	6.13391	6.48558	6.23401	6.38641	6.25406	1.00336	0.993501	0.988982	1.01416	1.00284	0.973901	1.03457	1.00867	0.975563	0.991404	0.977527	0.989364	0.980789	1.03702	0.996794	1.02116	0.00483447	-0.00940723	-0.0159839	0.0202864	0.00409857	-0.0381536	0.0490357	0.0124611	-0.0356924	-0.0124545	-0.0327916	-0.0154265	-0.0279855
P62195	PSMC5	26S proteasome regulatory subunit 8	52	6.30547	6.17921	6.2604	6.53067	6.34084	6.16107	5.99515	6.25962	6.0676	6.1568	6.36351	6.08978	6.09569	6.01407	6.51107	6.66906	6.31894	0.997869	0.977888	0.990736	1.03351	1.00347	0.975017	0.948759	0.990613	0.960225	0.974341	1.00705	0.963735	0.96467	0.951753	1.03041	1.05541	-0.00307809	-0.0322596	-0.0134272	0.047549	0.00499198	-0.0365011	-0.0758861	-0.0136069	-0.058556	-0.0375013	0.0101408	-0.0532919	-0.0518925
Q96HJ9-2	FMC1	Isoform 2 of Protein FMC1 homolog	52	6.56237	6.48841	6.31008	6.65387	6.5316	6.45345	6.33782	6.53806	5.74657	6.07011	6.45794	5.99388	5.46482	5.78383	6.35889	6.2483	6.50368	1.00902	0.997652	0.970232	1.02309	1.00429	0.992276	0.974497	1.00529	0.883587	0.933334	0.992967	0.921613	0.840265	0.889316	0.977737	0.960733	0.0129601	-0.00339184	-0.0435985	0.0329369	0.00617961	-0.0111862	-0.0372701	0.00760579	-0.178556	-0.0995342	-0.0101828	-0.117767	-0.251083
Q8IWJ2	GCC2	GRIP and coiled-coil domain-containing protein 2	52	6.26418	6.17247	6.47594	6.39844	6.22181	5.80404	6.49209	6.2446	6.45703	6.15655	6.37796	6.41953	6.14773	6.29131	5.93569	6.14065	6.32776	0.989953	0.975459	1.02342	1.01117	0.983257	0.917235	1.02597	0.986858	1.02043	0.972943	1.00793	1.0145	0.97155	0.99424	0.93804	0.970431	-0.0145686	-0.0358464	0.0333953	0.0160259	-0.02436	-0.124637	0.0369887	-0.0190851	0.0291764	-0.0395722	0.0114007	0.0207734	-0.0416405
P13798	APEH	Acylamino-acid-releasing enzyme	52	6.28391	6.34212	6.19449	6.00308	6.35084	6.29176	6.31495	6.14211	6.29631	6.26901	6.25115	6.28753	6.39634	6.22862	6.18993	6.15785	6.2059	1.01257	1.02195	0.998161	0.967318	1.02336	1.01384	1.01757	0.989721	1.01457	1.01017	1.00729	1.01315	1.03069	1.00366	0.997427	0.992257	0.0180221	0.0313247	-0.00265494	-0.0479376	0.033307	0.0198232	0.0251309	-0.0149061	0.0208661	0.0145972	0.0104812	0.0188529	0.0436062
P41091	EIF2S3	Eukaryotic translation initiation factor 2 subunit 3	52	6.04658	5.90635	6.31366	6.13366	6.23879	6.26848	6.24229	6.32847	6.36527	6.44422	6.25073	6.31496	6.56983	6.28249	6.19008	6.10414	6.10006	0.991232	0.968244	1.03502	1.00551	1.02274	1.02761	1.02332	1.03744	1.04348	1.05642	1.0247	1.03523	1.07701	1.02991	1.01476	1.00067	-0.0127047	-0.0465572	0.0496525	0.00792417	0.0324422	0.0392916	0.0332514	0.0530327	0.0613977	0.0791817	0.0352007	0.0499496	0.107032
O14776	TCERG1	Transcription elongation regulator 1	52	6.14999	6.22379	6.31068	6.25946	6.36607	6.01457	6.11229	6.33037	6.28031	6.33052	6.24392	6.25637	6.31375	6.09277	6.33841	6.37672	6.23598	0.986211	0.998045	1.01198	1.00377	1.02086	0.964495	0.980165	1.01514	1.00711	1.01516	1.00127	1.00327	1.01247	0.977035	1.01643	1.02257	-0.0200322	-0.00282292	0.0171792	0.0054219	0.0297867	-0.0521547	-0.0289033	0.0216735	0.0102195	0.0217077	0.00183575	0.00470953	0.0178808
O95347	SMC2	Structural maintenance of chromosomes protein 2	52	6.23346	6.14826	6.40514	6.16908	6.24639	5.70011	6.53963	6.28658	6.51153	6.21269	6.35396	6.38237	6.19669	6.40806	5.97163	6.2344	6.23899	0.999114	0.985458	1.02663	0.988795	1.00119	0.913628	1.04819	1.00763	1.04368	0.995785	1.01843	1.02298	0.993221	1.0271	0.957148	0.999265	-0.00127816	-0.0211332	0.0379188	-0.016256	0.00171131	-0.130322	0.0678977	0.010964	0.0616852	-0.00609327	0.0263447	0.0327809	-0.00981354
P49748-3	ACADVL	Isoform 3 of Very long-chain specific acyl-CoA dehydrogenase, mitochondrial	52	6.27303	6.15309	6.32715	6.38269	6.34705	5.88155	6.37057	6.28509	6.21784	6.18762	6.36114	6.22417	6.2867	6.12636	6.25438	6.32159	6.28399	0.998256	0.979169	1.00687	1.01571	1.01004	0.935958	1.01378	1.00018	0.989473	0.984664	1.01228	0.990481	1.00043	0.974916	0.995288	1.00598	-0.00251842	-0.0303698	0.00987491	0.0224837	0.0144053	-0.0954845	0.0197416	0.000252519	-0.0152674	-0.0222963	0.0176045	-0.0137994	0.000622035
P40222	TXLNA	Alpha-taxilin	52	6.302	6.44795	6.2042	6.06307	6.26783	6.03112	6.30235	6.33995	6.28779	6.2706	6.17685	6.07498	6.22601	6.44246	6.28993	6.27291	6.2543	1.00763	1.03096	0.991989	0.969423	1.00216	0.964315	1.00768	1.01369	1.00535	1.00261	0.987616	0.971328	0.995476	1.03008	1.0057	1.00297	0.0109602	0.043991	-0.0116044	-0.0448011	0.00311647	-0.0524236	0.0110403	0.0196219	0.00770346	0.00375392	-0.0179783	-0.0419699	-0.00654168
Q9ULW0	TPX2	Targeting protein for Xklp2	52	6.19721	6.23743	6.10585	6.55781	6.09912	7.00086	6.171	6.10197	5.7915	6.36846	6.2698	6.17164	5.96922	6.26423	6.51227	6.18161	6.27457	0.98767	0.99408	0.97311	1.04514	0.972037	1.11575	0.983493	0.972491	0.923011	1.01496	0.999239	0.983595	0.951335	0.998351	1.03788	0.985184	-0.0178989	-0.00856602	-0.0393256	0.0636964	-0.0409166	0.158014	-0.0240134	-0.0402427	-0.115581	0.0214268	-0.00109832	-0.0238638	-0.0719753
P20073	ANXA7	Annexin A7	52	6.18952	6.21905	6.14698	6.38853	6.50451	6.44454	6.0101	6.31029	6.21733	6.17637	6.09662	6.18255	6.42557	6.11552	6.2019	6.37062	6.23602	0.992543	0.997279	0.985722	1.02446	1.04305	1.03344	0.963772	1.01191	0.997003	0.990435	0.977646	0.991426	1.0304	0.980677	0.994529	1.02158	-0.010798	-0.00393134	-0.0207478	0.0348585	0.0608148	0.0474518	-0.0532366	0.0170808	-0.0043304	-0.0138664	-0.0326159	-0.0124236	0.0431989
P26368	U2AF2	Splicing factor U2AF 65 kDa subunit	52	6.08959	5.91796	6.28798	6.14472	6.26045	8.09741	6.22654	6.28493	6.2706	6.45497	6.13097	6.12607	6.04763	6.253	5.86934	5.53783	6.11006	0.996649	0.96856	1.02912	1.00567	1.02461	1.32526	1.01906	1.02862	1.02627	1.05645	1.00342	1.00262	0.989782	1.02339	0.960602	0.906346	-0.00484204	-0.0460872	0.0414095	0.00816013	0.0350792	0.406273	0.0272436	0.0407095	0.0374164	0.0792233	0.00492821	0.00377471	-0.0148173
Q13867	BLMH	Bleomycin hydrolase	52	6.11453	7.31083	6.18571	6.09453	6.11372	6.66129	6.42226	5.76715	6.30528	6.32083	6.17557	6.28321	5.69178	6.23903	5.89639	6.41787	6.4264	0.95147	1.13762	0.962547	0.948358	0.951344	1.03655	0.999356	0.897415	0.981153	0.983572	0.960969	0.977718	0.885687	0.970844	0.917526	0.998673	-0.0717692	0.186024	-0.0550716	-0.0764958	-0.0719603	0.0517908	-0.000929709	-0.156152	-0.0274503	-0.0238968	-0.0574385	-0.032509	-0.175131
P25789	PSMA4	Proteasome subunit alpha type-4	52	6.31631	6.42215	6.20225	6.18954	6.21293	6.03201	6.43991	6.37206	6.36887	6.16035	6.1874	6.27907	6.18489	6.32104	5.99495	6.31627	6.28256	1.00537	1.02222	0.987217	0.985194	0.988917	0.960119	1.02505	1.01425	1.01374	0.980547	0.984853	0.999444	0.984453	1.00612	0.954221	1.00537	0.00772886	0.0317032	-0.0185614	-0.0215209	-0.0160793	-0.0587143	0.0356874	0.0204067	0.0196843	-0.0283408	-0.0220198	-0.000802223	-0.0226052
Q96PZ0-2	PUS7	Isoform 2 of Pseudouridylate synthase 7 homolog	52	6.11406	6.11447	6.21961	6.17028	6.32309	6.48267	6.10936	6.18296	6.51689	6.38608	6.28266	6.24182	6.15415	6.22784	6.36811	6.10595	6.15461	0.993412	0.993479	1.01056	1.00255	1.02738	1.0533	0.992649	1.00461	1.05886	1.03761	1.02081	1.01417	0.999926	1.0119	1.03469	0.992095	-0.00953556	-0.00943882	0.0151579	0.00366969	0.0389635	0.0749219	-0.010645	0.0066314	0.0825174	0.0532644	0.0297092	0.0203005	-0.00010666
O00231-2	PSMD11	Isoform 2 of 26S proteasome non-ATPase regulatory subunit 11	51	6.3779	6.32611	6.12154	6.12646	6.47095	6.30026	6.02906	6.23069	6.11999	6.1534	6.13703	6.06644	6.79858	6.10897	6.36593	6.26669	6.238	1.02243	1.01412	0.98133	0.982119	1.03734	1.00998	0.966505	0.998828	0.981082	0.986438	0.983813	0.972497	1.08986	0.979315	1.02051	1.0046	0.0319973	0.0202345	-0.0271895	-0.0260304	0.0528934	0.0143272	-0.049151	-0.00169219	-0.0275548	-0.0197004	-0.0235435	-0.040234	0.124149
P52565	ARHGDIA	Rho GDP-dissociation inhibitor 1	51	6.26075	6.21041	6.34774	6.02896	6.17473	5.64908	6.52152	6.4491	6.68572	6.31193	6.30219	6.49282	6.15584	6.38346	5.83123	6.19452	6.21196	1.00785	0.99975	1.02186	0.97054	0.994006	0.909387	1.04983	1.03817	1.07626	1.01609	1.01452	1.04521	0.990965	1.02761	0.938709	0.997192	0.0112858	-0.000361185	0.0311933	-0.0431405	-0.00867365	-0.137034	0.0701586	0.0540481	0.106033	0.0230315	0.0208035	0.0637955	-0.013094
Q5SW79	CEP170	Centrosomal protein of 170 kDa	51	6.26175	6.25376	6.45785	6.2935	6.16814	6.30933	6.43601	6.28539	6.46934	6.41898	6.46073	6.27331	5.82948	6.22916	5.97233	5.88095	6.31672	0.991298	0.990034	1.02234	0.996325	0.976479	0.998831	1.01889	0.995041	1.02416	1.01619	1.0228	0.993129	0.922866	0.986139	0.94548	0.931014	-0.0126086	-0.0144506	0.0318794	-0.00531192	-0.034339	-0.00168767	0.0269921	-0.00717222	0.0344441	0.0231696	0.0325227	-0.00994763	-0.115807
O15355	PPM1G	Protein phosphatase 1G	51	6.25327	6.25407	6.2532	6.37375	6.25715	6.24748	6.35864	6.33655	5.87533	6.291	6.33145	6.18277	5.85994	6.31472	6.36719	6.44349	6.28357	0.995178	0.995305	0.995166	1.01435	0.995795	0.994256	1.01195	1.00843	0.93503	1.00118	1.00762	0.983958	0.932581	1.00496	1.01331	1.02545	-0.00697422	-0.00678966	-0.00699037	0.0205574	-0.00607934	-0.00831065	0.0171332	0.0121125	-0.0969151	0.00170433	0.0109509	-0.0233317	-0.100699
O43776	NARS1	Asparagine--tRNA ligase, cytoplasmic	51	5.76634	5.95136	5.66273	6.29391	6.40097	8.78757	5.62877	6.29727	5.83695	6.31398	6.19829	5.87003	5.7476	6.15301	7.41968	5.67155	5.91859	0.974277	1.00554	0.956771	1.06341	1.0815	1.48474	0.951033	1.06398	0.986207	1.06681	1.04726	0.991796	0.97111	1.03961	1.25362	0.958261	-0.0375964	0.00796709	-0.0637546	0.0887042	0.113038	0.570212	-0.0724326	0.0894742	-0.0200376	0.0932974	0.066618	-0.0118844	-0.0422926
Q14C86-6	GAPVD1	Isoform 6 of GTPase-activating protein and VPS9 domain-containing protein 1	51	6.32153	6.47435	6.25025	6.24797	6.38388	6.19463	6.01578	6.35839	6.23224	6.07585	6.38241	6.25366	6.19455	5.97484	6.40866	6.231	6.32353	0.999685	1.02385	0.988412	0.988052	1.00954	0.979617	0.951333	1.00551	0.985564	0.960833	1.00931	0.988952	0.979604	0.944859	1.01346	0.985368	-0.000455226	0.0340064	-0.0168151	-0.0173415	0.0137045	-0.0297109	-0.0719772	0.00793251	-0.0209782	-0.0576427	0.0133723	-0.0160282	-0.0297295
Q96HC4	PDLIM5	PDZ and LIM domain protein 5	51	6.02808	5.90375	6.37021	6.39061	6.22297	5.76413	6.47792	6.11328	6.61911	6.21956	6.32754	6.31137	6.38772	6.43569	6.07835	6.34969	6.17316	0.976498	0.956357	1.03192	1.03522	1.00807	0.93374	1.04937	0.9903	1.07224	1.00752	1.02501	1.02239	1.03476	1.04253	0.984641	1.0286	-0.0343112	-0.0643781	0.0453312	0.0499439	0.0115935	-0.0989069	0.0695209	-0.0140631	0.100627	0.0108028	0.035635	0.0319434	0.0492913
P24539	ATP5PB	ATP synthase F(0) complex subunit B1, mitochondrial	51	6.22045	6.09795	6.12409	6.34334	6.2573	6.83358	6.10319	6.09586	6.27909	6.25597	6.19158	6.10438	6.19289	6.23548	6.39062	6.27424	6.19646	1.00387	0.984103	0.988321	1.0237	1.00982	1.10282	0.984948	0.983765	1.01334	1.0096	0.999213	0.98514	0.999424	1.0063	1.03133	1.01255	0.00557529	-0.0231193	-0.0169482	0.033799	0.0140966	0.141198	-0.0218802	-0.0236139	0.0191118	0.0137899	-0.00113605	-0.0215989	-0.000830845
Q9BY44	EIF2A	Eukaryotic translation initiation factor 2A	51	6.14334	6.18818	6.38075	5.96523	6.39843	5.92127	6.45549	6.28137	6.56238	6.34548	6.17676	6.26526	6.15827	6.55731	6.05792	6.14256	6.16938	0.99578	1.00305	1.03426	0.96691	1.03713	0.959784	1.04638	1.01815	1.0637	1.02855	1.0012	1.01554	0.9982	1.06288	0.981934	0.995654	-0.00610111	0.00439082	0.0486017	-0.0485466	0.0525936	-0.0592177	0.0654023	0.0259549	0.0890948	0.040605	0.00172593	0.02225	-0.00259922
Q9UNN5	FAF1	FAS-associated factor 1	51	6.30263	6.16474	6.16646	6.17463	6.48106	6.42496	6.19005	6.21947	6.1622	6.22438	6.26371	6.08022	6.2373	6.28634	6.41588	6.20595	6.20212	1.01621	0.993974	0.994251	0.995568	1.04498	1.03593	0.998055	1.0028	0.993564	1.00359	1.00993	0.980346	1.00567	1.01358	1.03447	1.00062	0.0231937	-0.00872023	-0.00831776	-0.00640759	0.0634695	0.0509272	-0.00280921	0.00403137	-0.00931477	0.00516986	0.0142571	-0.0286368	0.00816137
P31947	SFN	14-3-3 protein sigma	50	6.52466	6.4024	6.13604	6.16171	6.37022	6.21613	6.18269	6.45568	5.82568	6.09148	6.23805	6.15097	6.3931	6.00298	6.32718	6.52105	6.3062	1.03464	1.01525	0.973017	0.977087	1.01015	0.985717	0.980414	1.0237	0.923802	0.965951	0.989193	0.975384	1.01378	0.951917	1.00333	1.03407	0.0491312	0.0218413	-0.0394636	-0.0334407	0.0145717	-0.0207548	-0.0285368	0.0337976	-0.114345	-0.0499787	-0.0156764	-0.0359576	0.0197442
P24752	ACAT1	Acetyl-CoA acetyltransferase, mitochondrial	50	6.3221	6.27279	6.21039	6.24167	6.37958	6.08866	6.1394	6.35747	6.18542	6.30615	6.14118	6.14098	6.49961	6.10948	6.26878	6.33633	6.26174	1.00964	1.00177	0.9918	0.996795	1.01882	0.97236	0.980463	1.01529	0.987812	1.00709	0.980747	0.980715	1.03799	0.975684	1.00112	1.01191	0.0138408	0.00254423	-0.0118792	-0.00463095	0.0268984	-0.0404383	-0.0284654	0.0218897	-0.0176915	0.0101965	-0.0280471	-0.0280941	0.0537901
Q9UHD1	CHORDC1	Cysteine and histidine-rich domain-containing protein 1	50	6.35339	6.14534	6.29936	6.21169	6.25674	5.76122	6.45236	6.27699	6.50062	6.16528	6.38241	6.32451	6.35488	6.41525	5.93762	6.16235	6.25245	1.01614	0.98287	1.0075	0.993482	1.00069	0.921435	1.03197	1.00393	1.03969	0.986059	1.02079	1.01153	1.01638	1.02604	0.949648	0.98559	0.0231061	-0.0249276	0.0107848	-0.00943463	0.000990692	-0.118046	0.0454065	0.00565245	0.0561569	-0.020254	0.0296808	0.0165332	0.0234444
Q02543	RPL18A	60S ribosomal protein L18a	50	5.4785	6.18835	5.89645	8.35914	5.71308	7.39399	5.5711	6.08559	6.55803	6.73374	5.61457	5.42471	5.33884	6.14069	7.7302	5.77303	6.48061	0.845368	0.954902	0.90986	1.28987	0.881565	1.14094	0.859657	0.939046	1.01195	1.03906	0.866364	0.837068	0.823818	0.947548	1.19282	0.890816	-0.242349	-0.0665748	-0.136283	0.367225	-0.181861	0.190223	-0.218167	-0.0907325	0.0171329	0.0552784	-0.206954	-0.256584	-0.279603
Q13404-1	UBE2V1	Isoform 1 of Ubiquitin-conjugating enzyme E2 variant 1	50	6.47535	6.27684	6.01707	6.06803	6.40752	6.04024	6.06329	6.3142	6.24484	6.00684	6.38171	6.35925	6.34431	6.27003	6.26247	6.46802	6.20932	1.04284	1.01087	0.969038	0.977245	1.03192	0.97277	0.976482	1.01689	1.00572	0.967391	1.02776	1.02415	1.02174	1.00978	1.00856	1.04166	0.0605223	0.0156026	-0.0453747	-0.0332076	0.0453302	-0.03983	-0.034335	0.0241641	0.00822874	-0.0478296	0.0395072	0.0344208	0.0310274
Q9NSI8-3	SAMSN1	Isoform 3 of SAM domain-containing protein SAMSN-1	50	6.31873	6.37689	6.43644	6.26	6.17567	6.04704	6.40236	6.39504	6.2018	6.23676	6.15375	6.18463	6.09573	6.38596	6.06526	6.26393	6.34802	0.995387	1.00455	1.01393	0.986135	0.972851	0.952588	1.00856	1.00741	0.976967	0.982474	0.969398	0.974262	0.960258	1.00598	0.955458	0.986754	-0.00667092	0.00654746	0.0199574	-0.0201429	-0.0397099	-0.0700764	0.0122983	0.0106478	-0.0336185	-0.0255088	-0.0448397	-0.0376182	-0.0585065
Q8NBS9	TXNDC5	Thioredoxin domain-containing protein 5	50	6.09402	6.18089	6.2596	6.22759	6.34455	6.20255	6.20003	6.18043	6.13136	6.44896	6.37366	6.19284	6.12894	6.34396	6.47515	6.2155	6.19053	0.984411	0.998444	1.01116	1.00599	1.02488	1.00194	1.00154	0.998369	0.990443	1.04175	1.02958	1.00037	0.990052	1.02479	1.04598	1.00403	-0.0226675	-0.00224718	0.0160087	0.0086122	0.0354561	0.00279969	0.00221343	-0.00235455	-0.0138547	0.0590048	0.0420603	0.000539407	-0.0144242
Q9UBC2-2	EPS15L1	Isoform 2 of Epidermal growth factor receptor substrate 15-like 1	50	6.15939	6.32163	6.29682	6.28359	6.14421	6.19635	6.4686	6.20593	6.09855	6.26096	6.37064	6.20116	5.96044	6.15776	6.35827	6.51568	6.26536	0.983087	1.00898	1.00502	1.00291	0.980664	0.988986	1.03244	0.990515	0.973376	0.999298	1.0168	0.989754	0.951333	0.982827	1.01483	1.03995	-0.0246094	0.0128998	0.0072266	0.00419222	-0.0281693	-0.0159782	0.0460567	-0.0137494	-0.0389306	-0.00101295	0.0240415	-0.0148587	-0.071978
Q15008	PSMD6	26S proteasome non-ATPase regulatory subunit 6	50	6.26639	6.32131	6.28849	6.02232	6.30543	6.08252	6.26859	6.24497	6.23818	6.32437	6.3752	6.26093	6.16428	6.28058	6.24173	6.3147	6.22463	1.00671	1.01553	1.01026	0.967499	1.01298	0.97717	1.00706	1.00327	1.00218	1.01602	1.02419	1.00583	0.990305	1.00899	1.00275	1.01447	0.00964706	0.0222361	0.0147261	-0.0476681	0.0186073	-0.0333183	0.0101535	0.00470714	0.00313768	0.0229343	0.0344831	0.00838947	-0.0140551
Q9NZ63	C9orf78	Telomere length and silencing protein 1 homolog	50	6.07533	6.24316	6.10656	6.75269	6.16878	6.16135	6.27124	6.35783	5.96376	6.25263	6.26446	6.19255	6.1362	6.29198	6.26835	6.49314	6.29444	0.965191	0.991854	0.970152	1.0728	0.980037	0.978857	0.996315	1.01007	0.947465	0.993358	0.995238	0.983813	0.974861	0.99961	0.995856	1.03157	-0.0511141	-0.0118004	-0.043717	0.101385	-0.0290917	-0.0308304	-0.00532615	0.0144576	-0.0778547	-0.00961374	-0.00688673	-0.0235433	-0.0367314
Q9Y376	CAB39	Calcium-binding protein 39	50	6.52961	6.37466	6.15625	6.22621	6.44526	6.01078	6.22083	6.31496	6.08382	6.21945	6.21129	6.20857	6.15663	6.1923	6.12409	6.5253	6.32168	1.03289	1.00838	0.973831	0.984898	1.01955	0.95082	0.984047	0.998937	0.962374	0.983828	0.982537	0.982107	0.973891	0.979534	0.968744	1.03221	0.0466882	0.0120398	-0.0382568	-0.0219543	0.02793	-0.0727564	-0.0232015	-0.00153498	-0.0553311	-0.0235216	-0.0254157	-0.0260476	-0.0381677
O75153	CLUH	Clustered mitochondria protein homolog	50	6.32546	6.16353	6.38772	6.17503	6.16309	5.96022	6.1572	6.27274	6.30358	6.26847	6.36982	6.29413	6.38793	6.25912	6.17731	6.33464	6.26293	1.00998	0.984128	1.01992	0.985964	0.984058	0.951666	0.983117	1.00157	1.00649	1.00088	1.01707	1.00498	1.01996	0.999391	0.986328	1.01145	0.0143315	-0.0230821	0.0284622	-0.0203928	-0.023185	-0.0714733	-0.0245645	0.00225686	0.00933251	0.00127445	0.0244137	0.00716807	0.0285096
Q99471	PFDN5	Prefoldin subunit 5	50	6.28948	6.48196	5.89027	6.04155	6.61656	6.40866	5.90634	6.27644	6.39967	6.18734	6.28377	6.26621	6.1497	6.18745	6.43349	6.1811	6.17582	1.0184	1.04957	0.953764	0.97826	1.07137	1.0377	0.956366	1.01629	1.03625	1.00187	1.01748	1.01464	0.995771	1.00188	1.04172	1.00086	0.0263112	0.0698006	-0.0682958	-0.0317108	0.0994518	0.0533932	-0.0643651	0.023317	0.051368	0.00268978	0.0250008	0.0209636	-0.0061135
P46781	RPS9	40S ribosomal protein S9	50	6.17013	6.18941	6.03272	6.04513	6.06371	8.52735	6.07178	6.36871	5.64774	6.33109	6.08518	5.89	5.83656	6.238	6.3135	6.18897	6.10935	1.00995	1.0131	0.987457	0.989489	0.99253	1.39579	0.993851	1.04245	0.924442	1.0363	0.996044	0.964096	0.955349	1.02106	1.03342	1.01303	0.0142826	0.0187836	-0.0182097	-0.0152449	-0.0108175	0.481079	-0.00889879	0.0599829	-0.113345	0.0514356	-0.00571836	-0.0527507	-0.0659
Q9Y678	COPG1	Coatomer subunit gamma-1	49	6.35535	6.16421	6.32779	6.21106	6.34483	6.12937	6.41241	6.29662	6.27303	6.14695	6.30865	6.34249	6.20227	6.18297	6.13374	6.16828	6.2646	1.01449	0.983975	1.01009	0.991453	1.01281	0.978413	1.02359	1.00511	1.00135	0.981219	1.00703	1.01243	0.99005	0.986969	0.979111	0.984624	0.0207486	-0.023307	0.0144788	-0.0123835	0.0183585	-0.0314842	0.0336437	0.00735463	0.00193949	-0.0273522	0.0101083	0.0178264	-0.0144266
Q05086	UBE3A	Ubiquitin-protein ligase E3A	49	6.22517	6.15555	6.3504	6.23892	6.1429	5.85973	6.42	6.14103	6.42218	6.37532	6.31423	6.4507	6.21051	6.37502	6.07267	6.24567	6.24251	0.997222	0.98607	1.01728	0.999425	0.984043	0.938682	1.02843	0.983744	1.02878	1.02128	1.01149	1.03335	0.994874	1.02123	0.972793	1.00051	-0.00401299	-0.0202385	0.0247212	-0.000829917	-0.0232063	-0.091292	0.0404471	-0.0236456	0.0409369	0.0303715	0.0164806	0.0473295	-0.00741448
Q13439-5	GOLGA4	Isoform 5 of Golgin subfamily A member 4	49	5.95242	6.05352	6.54487	5.74451	6.02043	5.91706	6.70224	6.15841	7.06822	6.39522	6.20405	6.61929	6.14141	6.68677	5.85049	5.94109	6.07383	0.980011	0.996656	1.07755	0.945781	0.991208	0.974189	1.10346	1.01393	1.16372	1.05291	1.02144	1.0898	1.01113	1.10091	0.963229	0.978146	-0.0291302	-0.00483225	0.107758	-0.0804227	-0.01274	-0.037726	0.142037	0.0199514	0.21874	0.0743875	0.0306038	0.12407	0.0159634
Q9NSD9	FARSB	Phenylalanine--tRNA ligase beta subunit	49	6.32437	6.01778	6.42214	6.37552	6.30397	5.6381	6.38388	6.26775	6.61801	6.13483	6.14262	6.37088	6.51345	6.14252	6.04762	6.29654	6.28495	1.00627	0.95749	1.02183	1.01441	1.00303	0.897079	1.01574	0.997263	1.05299	0.976114	0.977353	1.01367	1.03636	0.977338	0.962238	1.00184	0.00901993	-0.0626705	0.0311523	0.0206412	0.00435883	-0.156693	0.0225317	-0.0039542	0.0744956	-0.0348785	-0.0330477	0.0195908	0.0515201
P11940	PABPC1	Polyadenylate-binding protein 1	49	6.14925	6.12809	6.01247	7.23696	6.17503	7.33721	5.87627	6.2749	5.82592	5.94992	5.99662	5.76898	6.19262	5.80108	6.83941	6.43527	6.38169	0.963577	0.960261	0.942143	1.13402	0.967616	1.14973	0.920801	0.983266	0.912911	0.932342	0.93966	0.903989	0.970373	0.909019	1.07172	1.0084	-0.0535286	-0.0585016	-0.0859813	0.181445	-0.0474929	0.201292	-0.119038	-0.0243466	-0.131453	-0.101069	-0.0897895	-0.145623	-0.0433892
P50453	SERPINB9	Serpin B9	49	6.12024	6.36879	6.23361	6.19653	6.17926	6.11757	6.28002	6.33612	6.18016	6.41159	6.20837	6.26833	6.435	6.36161	6.13314	6.16967	6.22979	0.982415	1.02231	1.00061	0.994661	0.991889	0.981986	1.00806	1.01707	0.992033	1.02918	0.996561	1.00619	1.03294	1.02116	0.984485	0.990349	-0.0255959	0.0318352	0.000883786	-0.00772357	-0.01175	-0.0262254	0.011585	0.0244155	-0.0115399	0.0414981	-0.00496957	0.00889702	0.046756
P16615	ATP2A2	Sarcoplasmic/endoplasmic reticulum calcium ATPase 2	49	6.34449	6.24938	6.40619	6.23998	6.40983	5.85688	6.39319	6.35392	6.50587	6.30186	6.07859	6.39712	6.29734	6.02823	6.01209	6.12505	6.31001	1.00546	0.990391	1.01524	0.988902	1.01582	0.928189	1.01318	1.00696	1.03104	0.998708	0.963325	1.01381	0.997992	0.955344	0.952786	0.970688	0.00786191	-0.0139292	0.0218243	-0.0161009	0.0226438	-0.10751	0.0188937	0.0100046	0.0440997	-0.00186459	-0.0539056	0.0197803	-0.00289973
Q9NTK5	OLA1	Obg-like ATPase 1	49	6.30806	6.11976	6.49821	6.33146	6.37142	5.63264	6.28561	6.22875	6.57966	6.17235	6.27161	6.25478	6.28395	6.13002	6.11923	6.41248	6.31437	0.999	0.969179	1.02911	1.00271	1.00903	0.892035	0.995445	0.98644	1.04201	0.977508	0.993228	0.990562	0.995182	0.970804	0.969096	1.01554	-0.00144299	-0.0451643	0.041403	0.00389884	0.0129756	-0.164828	-0.00658661	-0.0196967	0.0593737	-0.0328195	-0.00980352	-0.0136802	-0.00696767
O60506-3	SYNCRIP	Isoform 3 of Heterogeneous nuclear ribonucleoprotein Q	49	6.12157	6.03164	6.41751	6.4603	6.32855	6.23492	6.25633	6.27502	6.30248	6.22079	6.19199	6.17727	6.25968	6.0479	6.45091	6.22315	6.25776	0.978237	0.963866	1.02553	1.03237	1.01131	0.996351	0.999772	1.00276	1.00715	0.994093	0.989491	0.987138	1.00031	0.966465	1.03087	0.99447	-0.0317435	-0.0530949	0.0363685	0.045956	0.0162298	-0.00527413	-0.000328564	0.00397488	0.0102745	-0.00854737	-0.015242	-0.0186758	0.000443731
P27635	RPL10	60S ribosomal protein L10	49	6.3558	6.33202	6.06325	6.39179	6.18463	6.69204	6.12194	6.16471	5.84972	6.3394	6.34528	6.04635	5.91601	6.31412	6.57733	6.30561	6.28571	1.01115	1.00737	0.964608	1.01688	0.983918	1.06464	0.973945	0.980749	0.930637	1.00854	1.00948	0.961919	0.941183	1.00452	1.04639	1.00317	0.0159969	0.010589	-0.0519856	0.0241431	-0.0233896	0.0903692	-0.038088	-0.0280438	-0.103709	0.0122694	0.013607	-0.0560124	-0.0874524
O15144	ARPC2	Actin-related protein 2/3 complex subunit 2	49	6.49974	6.28925	6.22633	6.37623	6.39129	5.79813	6.25826	6.26889	6.14684	5.99085	6.24817	6.34541	6.8281	5.99656	5.93648	6.39948	6.34789	1.02392	0.990763	0.980851	1.00446	1.00684	0.913395	0.985881	0.987555	0.968328	0.943755	0.984291	0.99961	1.07565	0.944654	0.93519	1.00813	0.0341054	-0.0133886	-0.0278945	0.00642711	0.00983059	-0.130689	-0.020515	-0.0180665	-0.0464316	-0.0835158	-0.0228429	-0.000563175	0.105208
Q9Y570	PPME1	Protein phosphatase methylesterase 1	49	6.39871	6.17983	6.27474	6.23674	6.36416	5.89662	6.25979	6.22186	6.22905	6.28847	6.34565	6.18061	6.30234	6.09013	6.31295	6.41837	6.27251	1.02012	0.985225	1.00036	0.994298	1.01461	0.940074	0.997973	0.991926	0.993072	1.00255	1.01166	0.98535	1.00476	0.970925	1.00645	1.02325	0.0287394	-0.0214746	0.000513965	-0.0082496	0.0209284	-0.0891535	-0.00292746	-0.0116958	-0.0100296	0.00366733	0.0167262	-0.0212925	0.00684587
P30040	ERP29	Endoplasmic reticulum resident protein 29	49	6.19049	6.25405	5.8873	6.54611	6.34877	6.70489	5.89068	6.2044	5.7398	6.19377	6.34531	5.95054	6.30815	6.2073	6.7783	6.45015	6.21949	0.995338	1.00556	0.946589	1.05252	1.02079	1.07805	0.947133	0.997574	0.922873	0.995865	1.02023	0.956757	1.01426	0.99804	1.08985	1.03709	-0.0067421	0.00799505	-0.0791896	0.0738421	0.0296814	0.108418	-0.0783615	-0.003504	-0.115795	-0.00597789	0.0288949	-0.0637751	0.0204213
P09382	LGALS1	Galectin-1	49	6.33315	6.23725	6.08225	5.9542	6.30916	6.23141	6.28546	6.10135	6.63029	6.31974	6.13609	6.28743	6.2989	6.27617	6.31423	6.20293	6.15171	1.02949	1.0139	0.988708	0.967893	1.02559	1.01296	1.02174	0.991813	1.0778	1.02731	0.99746	1.02206	1.02393	1.02023	1.02642	1.00833	0.0419352	0.019922	-0.016383	-0.0470804	0.0364599	0.0185706	0.0310303	-0.0118596	0.108084	0.0388771	-0.00366844	0.0314824	0.0341118
P62750	RPL23A	60S ribosomal protein L23a	49	5.97636	6.41165	5.89076	6.26529	6.339	7.83295	5.92129	6.24592	5.75636	6.62404	5.94644	5.77216	6.01294	6.31064	6.6144	6.07979	6.13602	0.973981	1.04492	0.96003	1.02107	1.03308	1.27655	0.965006	1.01791	0.938127	1.07953	0.969105	0.940702	0.979942	1.02846	1.07796	0.990837	-0.038035	0.0633937	-0.0588482	0.0300793	0.0469533	0.352254	-0.0513905	0.0256121	-0.0921452	0.110409	-0.0452758	-0.0881907	-0.0292314
P30085	CMPK1	UMP-CMP kinase	49	6.11533	5.9227	6.43955	6.23452	6.22278	5.58858	6.66531	6.24788	6.76707	6.32664	6.17828	6.41848	6.30744	6.44886	5.87502	6.24156	6.17802	0.989852	0.958672	1.04233	1.00914	1.00724	0.90459	1.07887	1.01131	1.09535	1.02406	1.00004	1.03892	1.02095	1.04384	0.950954	1.01028	-0.0147154	-0.0608907	0.0598142	0.0131328	0.0104135	-0.144664	0.109526	0.016221	0.131386	0.0342938	5.95465e-05	0.055086	0.0299089
Q15907	RAB11B	Ras-related protein Rab-11B	48	6.60432	6.47165	5.98385	6.20621	6.27391	6.23264	6.3081	6.12627	6.33644	5.99457	6.10821	6.25895	6.16152	6.02562	6.29356	6.61419	6.31651	1.04557	1.02456	0.947335	0.982538	0.993256	0.986722	0.998669	0.969882	1.00316	0.949032	0.967023	0.990888	0.975463	0.953948	0.996367	1.04713	0.0642829	0.0350065	-0.0780531	-0.0254146	-0.00976226	-0.0192837	-0.00192156	-0.0441181	0.00454543	-0.0754708	-0.0483774	-0.0132064	-0.0358408
Q6P2Q9	PRPF8	Pre-mRNA-processing-splicing factor 8	48	6.27289	6.12676	6.41397	6.43914	6.37577	6.06892	6.17962	6.28311	6.46498	6.34315	6.12547	6.29083	6.22651	6.11522	6.07121	6.20244	6.31319	0.993617	0.97047	1.01596	1.01995	1.00991	0.961308	0.978843	0.995235	1.02404	1.00475	0.970265	0.996458	0.98627	0.968642	0.961671	0.982457	-0.00923891	-0.0432448	0.0228484	0.0284988	0.0142304	-0.0569294	-0.030851	-0.00689033	0.0342767	0.00683029	-0.0435486	-0.00511879	-0.0199454
P42229	STAT5A	Signal transducer and activator of transcription 5A	48	6.37072	6.12686	6.47972	6.52369	6.31499	5.74087	6.23006	6.37748	6.35344	6.11548	6.19249	6.37138	6.38054	5.94191	6.08337	6.397	6.37525	0.99929	0.961039	1.01639	1.02328	0.990548	0.900494	0.977226	1.00035	0.996579	0.959254	0.971333	0.999393	1.00083	0.932028	0.954217	1.00341	-0.00102492	-0.0573335	0.0234501	0.0332069	-0.0137009	-0.151212	-0.0332353	0.000505118	-0.00494342	-0.0600156	-0.0419617	-0.000875467	0.00119718
O95757	HSPA4L	Heat shock 70 kDa protein 4L	48	6.12412	6.29134	6.19888	6.47718	6.26624	6.62212	6.11551	6.21617	6.16745	6.43453	6.11661	6.01301	6.08277	6.19761	6.47472	6.20174	6.27288	0.976285	1.00294	0.988203	1.03257	0.998941	1.05567	0.974913	0.990959	0.983193	1.02577	0.975088	0.958572	0.969693	0.988001	1.03218	0.988659	-0.0346254	0.00423937	-0.0171204	0.0462379	-0.00152794	0.0781652	-0.0366551	-0.013102	-0.0244538	0.0367068	-0.0363957	-0.0610406	-0.0443995
Q00341	HDLBP	Vigilin	48	6.36462	6.10556	6.43	6.06023	6.37831	5.86014	6.28287	6.32092	6.45787	6.26105	6.24811	6.26212	6.31576	6.26773	6.0398	6.34492	6.2401	1.01995	0.978439	1.03043	0.971175	1.02215	0.93911	1.00685	1.01295	1.0349	1.00336	1.00128	1.00353	1.01212	1.00443	0.967901	1.0168	0.0285047	-0.0314461	0.043249	-0.0421972	0.0316045	-0.0906346	0.009854	0.0185648	0.0494887	0.0048349	0.00185013	0.00508143	0.0173866
Q32MZ4	LRRFIP1	Leucine-rich repeat flightless-interacting protein 1	48	6.11971	6.18889	6.31707	6.08449	6.24996	6.18764	6.38286	6.05469	6.40447	6.54414	6.46228	6.16977	5.84405	6.50756	6.22796	6.25447	6.17754	0.990639	1.00184	1.02259	0.984937	1.01172	1.00163	1.03324	0.980113	1.03673	1.05934	1.04609	0.998742	0.946016	1.05342	1.00816	1.01245	-0.0135692	0.00264823	0.0322231	-0.0218961	0.0168145	0.00235682	0.0471706	-0.0289794	0.0520467	0.0831712	0.0650108	-0.00181574	-0.0800639
P83731	RPL24	60S ribosomal protein L24	48	5.99723	6.29544	6.09266	6.14243	6.26509	6.64326	6.29504	6.28357	6.09136	6.47735	6.31364	6.12823	5.84068	6.59818	6.34112	6.1947	6.13194	0.978031	1.02666	0.993594	1.00171	1.02171	1.08339	1.0266	1.02473	0.993382	1.05633	1.02963	0.999395	0.952501	1.07603	1.03411	1.01023	-0.0320473	0.0379636	-0.00927135	0.00246593	0.0309917	0.115548	0.037872	0.0352409	-0.00957921	0.0790601	0.0421284	-0.000873136	-0.0702072
P54687-5	BCAT1	Isoform 5 of Branched-chain-amino-acid aminotransferase, cytosolic	48	6.27062	6.23035	6.44561	6.24647	6.28346	5.8762	6.17876	6.21955	6.47165	6.22472	6.32863	6.33447	6.4473	6.19771	6.03021	6.2143	6.29826	0.995611	0.989217	1.02339	0.991777	0.99765	0.932987	0.981026	0.987503	1.02753	0.988323	1.00482	1.00575	1.02366	0.984035	0.95744	0.986669	-0.00634579	-0.0156407	0.033363	-0.0119128	-0.00339469	-0.10007	-0.0276366	-0.0181437	0.0391797	-0.0169449	0.00693934	0.00827003	0.0337412
Q15084-2	PDIA6	Isoform 2 of Protein disulfide-isomerase A6	48	6.35526	6.2849	6.21176	5.79621	6.42761	5.96996	6.49318	6.31966	6.38596	6.48649	6.41557	6.24065	5.50371	6.46352	6.2948	6.35076	6.16203	1.03136	1.01994	1.00807	0.940633	1.0431	0.96883	1.05374	1.02558	1.03634	1.05265	1.04115	1.01276	0.893165	1.04893	1.02155	1.03063	0.0445449	0.0284835	0.0115958	-0.0882964	0.0608761	-0.045685	0.0755189	0.0364407	0.0514972	0.0740317	0.0581712	0.01829	-0.163002
P32929	CTH	Cystathionine gamma-lyase	47	6.16579	6.20909	6.37337	6.10939	6.26149	6.11602	6.51511	6.20613	6.50328	6.25655	6.1391	6.46438	6.30371	6.41013	5.79544	6.17101	6.21441	0.992176	0.999144	1.02558	0.983101	1.00758	0.984167	1.04839	0.998668	1.04648	1.00678	0.987881	1.04022	1.01437	1.03149	0.932581	0.993016	-0.0113317	-0.00123558	0.036439	-0.0245891	0.0108886	-0.0230243	0.0681721	-0.00192351	0.0655501	0.00974992	-0.0175903	0.0568946	0.0205837
P00390	GSR	Glutathione reductase, mitochondrial	47	6.31933	6.1857	6.17236	6.40988	6.23176	6.71649	6.31472	6.14156	6.46716	6.01586	6.19214	6.45231	6.19654	5.96118	6.07655	6.14646	6.27182	1.00758	0.986269	0.984142	1.02201	0.993613	1.0709	1.00684	0.979231	1.03115	0.959189	0.987296	1.02878	0.987997	0.950471	0.968866	0.980013	0.010888	-0.0199467	-0.0230614	0.0314138	-0.00924391	0.0988239	0.00983519	-0.0302784	0.0442487	-0.0601126	-0.0184455	0.0409322	-0.0174207
Q13310-3	PABPC4	Isoform 3 of Polyadenylate-binding protein 4	47	6.16583	6.11746	5.88046	6.45127	6.53968	6.6415	5.74587	6.46765	6.01944	6.11593	6.31217	5.98391	6.32825	6.10045	6.89272	6.23741	6.15376	1.00196	0.994102	0.955589	1.04835	1.06271	1.07926	0.933718	1.05101	0.978173	0.993853	1.02574	0.9724	1.02836	0.991338	1.12008	1.01359	0.00282811	-0.00853424	-0.065538	0.0681162	0.087753	0.110042	-0.0989417	0.0717746	-0.0318377	-0.00889511	0.0366691	-0.0403785	0.0403396
Q9NPH2	ISYNA1	Inositol-3-phosphate synthase 1	47	6.14753	6.11576	6.25461	6.48312	6.257	6.11553	6.02731	5.9722	6.48494	6.09047	6.41403	6.54346	6.64604	6.09179	6.16626	6.18994	6.25025	0.983565	0.978482	1.0007	1.03726	1.00108	0.978445	0.96433	0.955513	1.03755	0.974435	1.0262	1.04691	1.06332	0.974647	0.986561	0.99035	-0.0239082	-0.0313833	0.00100488	0.0527732	0.00155605	-0.0314375	-0.0524008	-0.0656526	0.0531782	-0.0373615	0.0373161	0.0661386	0.0885799
P35659	DEK	Protein DEK	47	6.13255	6.20022	6.31994	6.11302	6.25124	5.84235	6.28508	6.41691	6.69043	6.26018	6.28167	6.20367	6.38611	6.40395	5.9786	6.23406	6.19143	0.99049	1.00142	1.02076	0.987335	1.00966	0.943618	1.01513	1.03642	1.08059	1.0111	1.01457	1.00198	1.03144	1.03432	0.965625	1.00688	-0.0137862	0.00204617	0.0296376	-0.018388	0.0138692	-0.0837245	0.0216579	0.0516055	0.111826	0.0159309	0.0208749	0.0028487	0.0446642
Q15019-2	SEPTIN2	Isoform 2 of Septin-2	47	6.27923	5.93197	6.59545	6.10136	6.39462	5.30577	6.7059	6.36662	6.61399	6.0439	6.38575	6.52822	6.23909	6.29609	5.76775	6.44429	6.227	1.00839	0.95262	1.05917	0.979823	1.02692	0.852058	1.07691	1.02242	1.06215	0.970595	1.02549	1.04837	1.00194	1.01109	0.926248	1.03489	0.0120498	-0.0700266	0.0829332	-0.029407	0.0383208	-0.230976	0.106893	0.0319898	0.086983	-0.0430581	0.0363182	0.0681518	0.00279776
P21912	SDHB	Succinate dehydrogenase [ubiquinone] iron-sulfur subunit, mitochondrial	47	5.82185	6.11185	5.84376	6.0615	6.26083	7.99892	5.74375	6.02089	5.99249	6.7714	6.20022	5.90975	6.12065	6.23294	7.14708	5.76211	5.95974	0.976863	1.02552	0.980539	1.01707	1.05052	1.34216	0.963758	1.01026	1.0055	1.13619	1.04035	0.991612	1.027	1.04584	1.19923	0.966839	-0.0337717	0.0363597	-0.0283525	0.0244255	0.0711045	0.424556	-0.0532564	0.0147274	0.0079062	0.184205	0.05707	-0.0121523	0.0384355
P62424	RPL7A	60S ribosomal protein L7a	47	5.97585	6.09858	6.05125	6.06882	6.29369	6.53983	6.33873	6.51671	6.33417	6.35181	6.36395	6.23536	6.10498	6.54851	6.22609	5.95169	6.04862	0.987968	1.00826	1.00043	1.00334	1.04052	1.08121	1.04796	1.07739	1.04721	1.05012	1.05213	1.03087	1.00932	1.08264	1.02934	0.983974	-0.0174633	0.0118661	0.000625969	0.00480881	0.0572989	0.112646	0.0675866	0.107537	0.0665484	0.0705605	0.0733153	0.0438656	0.0133793
Q16851	UGP2	UTP--glucose-1-phosphate uridylyltransferase	47	6.38882	6.23653	6.10787	6.32547	6.32413	6.38546	6.14002	6.33819	5.82458	6.23629	6.1841	5.92336	6.589	6.21821	6.4606	6.31738	6.26467	1.01982	0.995508	0.97497	1.0097	1.00949	1.01928	0.980102	1.01174	0.92975	0.995469	0.987139	0.945518	1.05177	0.992583	1.03127	1.00841	0.0283104	-0.00649555	-0.0365697	0.0139336	0.0136279	0.0275515	-0.0289957	0.0168318	-0.105085	-0.00655107	-0.0186754	-0.0808233	0.0728204
P51149	RAB7A	Ras-related protein Rab-7a	47	6.53822	6.35556	6.27661	6.0704	6.26857	5.94918	6.44427	6.2998	6.23699	6.28287	6.42484	6.43193	5.92558	6.2101	5.98733	6.29774	6.3102	1.03614	1.00719	0.994677	0.961998	0.993403	0.942788	1.02125	0.998352	0.988399	0.995669	1.01817	1.01929	0.939048	0.984137	0.948834	0.998026	0.0512128	0.0103341	-0.00769959	-0.0558936	-0.00954879	-0.0849943	0.0303318	-0.00237913	-0.0168352	-0.00626143	0.0259754	0.0275665	-0.0907288
P21281	ATP6V1B2	V-type proton ATPase subunit B, brain isoform	47	6.30649	6.2606	6.261	5.87271	6.22451	6.26303	6.42131	6.32103	6.38886	6.3867	6.23465	6.26636	6.12142	6.39038	6.06933	6.21164	6.1752	1.02126	1.01383	1.01389	0.951015	1.00799	1.01422	1.03985	1.02362	1.0346	1.03425	1.00963	1.01476	0.991291	1.03485	0.982856	1.0059	0.0303514	0.0198151	0.0199072	-0.0724595	0.0114744	0.0203749	0.0563818	0.0336738	0.0490727	0.0485848	0.0138227	0.0211418	-0.0126195
P07602-3	PSAP	Isoform Sap-mu-9 of Prosaposin	47	6.55679	6.44945	6.01423	6.80367	6.44518	5.79689	6.06036	6.11993	6.5434	5.71265	6.16406	6.11277	6.13027	6.02707	6.60882	6.45444	6.45603	1.01561	0.99898	0.931567	1.05385	0.998319	0.897903	0.938712	0.947939	1.01353	0.884854	0.954775	0.94683	0.949541	0.933556	1.02367	0.999753	0.0223413	-0.00147227	-0.102268	0.0756648	-0.00242775	-0.155369	-0.0912449	-0.0771332	0.0193921	-0.176488	-0.0667675	-0.0788221	-0.0746978
E9PAV3	NACA	Nascent polypeptide-associated complex subunit alpha, muscle-specific form	47	6.04806	6.07022	6.48065	6.08351	6.185	6.37891	6.60657	6.25799	6.55126	6.4945	6.33839	6.39892	5.56812	6.51155	5.95115	6.07521	6.17061	0.98014	0.983731	1.05024	0.985885	1.00233	1.03376	1.07065	1.01416	1.06169	1.05249	1.02719	1.037	0.902361	1.05525	0.964435	0.98454	-0.0289407	-0.0236643	0.0707254	-0.0205092	0.00336048	0.0478968	0.0984883	0.0202862	0.0863593	0.0738053	0.0387033	0.0524153	-0.148223
P61086	UBE2K	Ubiquitin-conjugating enzyme E2 K	47	6.28765	6.33239	6.1743	5.883	6.56482	6.09757	6.40108	6.21025	6.45188	6.36585	6.29774	6.39465	6.0237	6.3389	5.96793	6.20828	6.16933	1.01918	1.02643	1.0008	0.953587	1.0641	0.988367	1.03756	1.00663	1.0458	1.03185	1.02081	1.03652	0.976394	1.02749	0.967354	1.00631	0.0274059	0.0376351	0.0011606	-0.068563	0.0896405	-0.0168806	0.0532004	0.00953636	0.0646046	0.0452382	0.0297192	0.0517504	-0.0344651
P62316	SNRPD2	Small nuclear ribonucleoprotein Sm D2	47	6.19493	6.20408	6.4159	5.91695	6.23808	6.02481	6.6268	6.22481	6.3645	6.39718	6.2282	6.29321	5.81528	6.5873	6.17792	6.29005	6.18297	1.00194	1.00342	1.03767	0.956976	1.00891	0.974421	1.07178	1.00677	1.02936	1.03465	1.00732	1.01783	0.940533	1.0654	0.999184	1.01732	0.00278914	0.00491845	0.0533528	-0.0634451	0.0128032	-0.0373831	0.100014	0.00973096	0.0417483	0.0491372	0.0105164	0.0254972	-0.0884502
Q9UHV9	PFDN2	Prefoldin subunit 2	46	5.98249	6.23289	5.31661	7.66604	5.75854	8.85134	5.29819	6.13385	5.49319	5.99443	5.82354	5.52432	5.45738	6.0433	8.19112	6.23276	6.29951	0.949676	0.989425	0.843972	1.21693	0.914125	1.40508	0.841048	0.973703	0.872003	0.951571	0.924444	0.876945	0.866319	0.959329	1.30028	0.989404	-0.074493	-0.0153378	-0.244732	0.283242	-0.129536	0.490657	-0.249739	-0.0384462	-0.197595	-0.0716165	-0.113343	-0.189442	-0.207031
P19623	SRM	Spermidine synthase	46	6.26857	5.99383	6.30745	6.37385	6.30244	5.94391	6.22478	6.37495	6.38578	6.12829	6.18342	6.29519	6.60483	6.16195	6.12191	6.32886	6.23592	1.00523	0.961177	1.01147	1.02212	1.01067	0.953172	0.998213	1.02229	1.02403	0.98274	0.99158	1.0095	1.05916	0.988137	0.981716	1.0149	0.00753279	-0.0571254	0.0164533	0.0315615	0.0153069	-0.0691913	-0.00258073	0.0318104	0.0342593	-0.025119	-0.0121986	0.0136463	0.0829179
P35520-2	CBS	Isoform 2 of Cystathionine beta-synthase	46	6.31006	6.23823	6.1813	6.3166	6.24102	6.39775	6.16803	6.21502	6.10982	6.26083	6.2303	6.13499	6.24575	6.16515	6.36161	6.42356	6.26155	1.00775	0.996276	0.987184	1.00879	0.996722	1.02175	0.985065	0.992569	0.975768	0.999885	0.99501	0.979788	0.997477	0.984605	1.01598	1.02587	0.0111345	-0.00538251	-0.018609	0.012629	-0.00473742	0.0310454	-0.0217095	-0.0107602	-0.0353894	-0.000165325	-0.00721762	-0.0294583	-0.00364443
Q99536	VAT1	Synaptic vesicle membrane protein VAT-1 homolog	46	6.19492	6.10497	6.13029	6.25716	6.33022	6.95273	6.176	6.19192	6.28178	6.32963	6.05842	6.31082	6.31529	6.2455	6.13482	5.98554	6.17183	1.00374	0.989166	0.993269	1.01382	1.02566	1.12653	1.00067	1.00325	1.01781	1.02557	0.981624	1.02252	1.02324	1.01194	0.994003	0.969815	0.00538616	-0.0157153	-0.00974417	0.0198085	0.0365561	0.17188	0.00097326	0.00468734	0.0254739	0.0364217	-0.0267579	0.032128	0.0331495
P61604	HSPE1	10 kDa heat shock protein, mitochondrial	46	6.02429	5.89014	5.76899	7.08782	6.0184	7.86097	6.01572	6.02979	6.043	6.03756	5.98725	5.87521	5.7409	6.16491	7.20183	6.25322	6.19281	0.972788	0.951126	0.931563	1.14452	0.971837	1.26937	0.971404	0.973676	0.975809	0.974931	0.966807	0.948715	0.927027	0.995495	1.16293	1.00975	-0.039803	-0.0722923	-0.102275	0.194748	-0.0412142	0.344113	-0.0418568	-0.0384864	-0.0353292	-0.0366286	-0.0487007	-0.0759538	-0.109317
Q07157	TJP1	Tight junction protein ZO-1	46	6.19543	6.35284	6.2815	6.51255	6.24307	6.37056	6.18348	6.17243	6.1328	6.25849	6.30189	6.14784	6.3417	6.02561	6.22152	6.25828	6.33558	0.977879	1.00272	0.991464	1.02793	0.985398	1.00552	0.975993	0.974249	0.967993	0.987832	0.994682	0.970367	1.00097	0.951075	0.981997	0.987799	-0.0322723	0.00392499	-0.0123676	0.0397458	-0.0212211	0.0079435	-0.0350577	-0.0376381	-0.0469308	-0.0176621	-0.00769213	-0.0433971	0.00139293
A0A499FI31	SART3	Squamous cell carcinoma antigen recognized by T-cells 3	46	6.1502	6.10368	6.41936	6.36533	6.21885	5.99729	6.3123	6.25939	6.47732	6.37114	6.26404	6.40415	6.23083	6.25361	6.07403	6.09848	6.25964	0.982516	0.975084	1.02552	1.01688	0.993483	0.958088	1.00841	0.99996	1.03477	1.01781	1.0007	1.02309	0.995397	0.999036	0.970348	0.974254	-0.0254469	-0.0364009	0.0363492	0.024155	-0.00943245	-0.0617695	0.0120855	-5.81963e-05	0.0493168	0.0254713	0.00101316	0.0329268	-0.00665591
P78344	EIF4G2	Eukaryotic translation initiation factor 4 gamma 2	46	6.32197	6.16275	6.30092	6.58728	6.43582	6.10833	6.14162	6.33853	6.06122	6.17669	6.38576	6.16911	6.16382	5.83518	6.40709	6.40392	6.34323	0.996648	0.971548	0.99333	1.03847	1.0146	0.962968	0.968217	0.999259	0.955542	0.973745	1.0067	0.97255	0.971716	0.919907	1.01007	1.00957	-0.00484346	-0.0416434	-0.00965516	0.0544652	0.0209063	-0.0544396	-0.0465984	-0.00106936	-0.0656094	-0.0383837	0.00964068	-0.0401553	-0.0413929
Q9Y5L0	TNPO3	Transportin-3	46	6.33183	6.03059	6.21973	6.10161	6.31185	5.94043	6.33949	6.30208	6.3595	6.13948	6.29225	6.40333	6.63132	6.1812	6.13844	6.27689	6.17094	1.02607	0.977256	1.00791	0.988765	1.02283	0.962646	1.02731	1.02125	1.03056	0.994902	1.01966	1.03766	1.0746	1.00166	0.994733	1.01717	0.0371323	-0.0331911	0.0113617	-0.0163003	0.0325727	-0.0549229	0.0388765	0.0303378	0.0434231	-0.0073738	0.0280857	0.0533321	0.103806
A0A1B0GW23	ABHD14A-ACY1	ABHD14A-ACY1 readthrough (Fragment)	46	6.76568	6.50869	5.92278	6.66594	6.2503	6.28843	5.90833	6.20653	5.78069	5.94966	6.13394	6.07409	6.22766	5.69592	6.77993	6.84142	6.46577	1.04638	1.00664	0.91602	1.03096	0.966675	0.972572	0.913786	0.959905	0.894045	0.920178	0.948679	0.939422	0.963173	0.880934	1.04859	1.0581	0.0654122	0.00954446	-0.126548	0.0439856	-0.0488973	-0.0401229	-0.130072	-0.0590358	-0.161581	-0.120016	-0.0760087	-0.0901545	-0.0541326
O75312	ZPR1	Zinc finger protein ZPR1	46	6.22615	6.28726	6.22809	6.20867	6.44598	6.41206	6.34405	6.27753	6.13768	6.29228	6.2693	6.05707	6.01636	6.12762	6.36508	6.30482	6.23754	0.998174	1.00797	0.998485	0.995371	1.03342	1.02798	1.01708	1.00641	0.98399	1.00878	1.00509	0.971067	0.96454	0.982377	1.02045	1.01079	-0.00263741	0.0114537	-0.00218795	-0.00669349	0.047422	0.0398102	0.0244264	0.00921928	-0.0232843	0.0126051	0.00732663	-0.0423577	-0.0520868
Q9H6T3	RPAP3	RNA polymerase II-associated protein 3	46	6.17895	6.09555	6.44547	6.4675	6.2093	5.75902	6.39484	6.29397	6.35811	6.15282	6.31917	6.23297	6.17804	6.25174	6.25152	6.41104	6.29687	0.981274	0.968029	1.0236	1.0271	0.986093	0.914585	1.01556	0.99954	1.00973	0.977124	1.00354	0.989852	0.981129	0.992833	0.992798	1.01813	-0.0272726	-0.0468779	0.0336513	0.0385738	-0.0202037	-0.128811	0.022274	-0.000664008	0.0139637	-0.0333865	0.00510077	-0.0147145	-0.0274851
Q15021	NCAPD2	Condensin complex subunit 1	46	6.2131	6.15	6.43285	6.38691	6.28844	5.92467	6.30703	6.20804	6.41961	6.12676	6.3248	6.41892	6.15322	6.10242	6.16555	6.37767	6.29571	0.986878	0.976855	1.02178	1.01449	0.998844	0.941064	1.0018	0.986074	1.01968	0.973163	1.00462	1.01957	0.977366	0.969297	0.979325	1.01302	-0.019057	-0.0337838	0.0310878	0.0207479	-0.00166807	-0.0876354	0.00259056	-0.0202324	0.0281154	-0.0392459	0.00664963	0.0279603	-0.0330287
Q9P265	DIP2B	Disco-interacting protein 2 homolog B	46	6.20384	6.08305	6.28385	6.10332	6.35031	6.03198	6.3423	6.17513	6.41394	6.35548	6.30203	6.49405	6.33563	6.33357	6.06382	6.12769	6.16852	1.00573	0.986145	1.0187	0.989431	1.02947	0.977866	1.02817	1.00107	1.03979	1.03031	1.02164	1.05277	1.02709	1.02676	0.983028	0.993382	0.00823826	-0.0201284	0.0267255	-0.015329	0.0419038	-0.0322916	0.0400829	0.00154629	0.0562876	0.0430779	0.0308934	0.0741953	0.0385649
Q14157-5	UBAP2L	Isoform 5 of Ubiquitin-associated protein 2-like	46	6.20885	6.15697	6.33679	6.16227	6.25957	6.13248	6.26863	6.19979	6.19974	6.30531	6.32226	6.38779	6.48681	6.19933	6.15386	6.21954	6.21622	0.998814	0.990468	1.0194	0.991321	1.00697	0.986529	1.00843	0.997357	0.997349	1.01433	1.01706	1.0276	1.04353	0.997283	0.989968	1.00053	-0.00171149	-0.013817	0.0277146	-0.0125757	0.010026	-0.0195669	0.0121126	-0.00381821	-0.00382985	0.0205297	0.0244028	0.0392793	0.0614716
Q02878	RPL6	60S ribosomal protein L6	46	6.31254	6.60336	6.14069	6.1945	6.26255	6.53231	6.07586	6.19635	5.93657	6.36868	6.09129	6.14397	6.62958	6.19614	6.13521	6.18039	6.31277	0.999963	1.04603	0.972741	0.981265	0.992044	1.03478	0.962471	0.981558	0.940406	1.00886	0.964915	0.97326	1.05019	0.981524	0.971873	0.979029	-5.31356e-05	0.0649265	-0.039873	-0.0272859	-0.0115235	0.0493195	-0.0551851	-0.0268551	-0.0886441	0.0127206	-0.051526	-0.0391026	0.0706437
Q9UHD9	UBQLN2	Ubiquilin-2	46	6.38338	6.53843	5.97629	6.02427	6.33997	6.3371	6.13663	6.04071	6.57451	6.12679	6.17877	6.51428	6.00621	6.14734	6.41894	6.25637	6.23059	1.02452	1.04941	0.959185	0.966886	1.01755	1.01709	0.984919	0.969524	1.0552	0.98334	0.991683	1.04553	0.963987	0.986638	1.03023	1.00414	0.0349512	0.0695749	-0.0601192	-0.0485829	0.0251067	0.0244534	-0.0219228	-0.0446512	0.077514	-0.024238	-0.0120497	0.0642364	-0.0529144
Q9P2J5	LARS	Leucine--tRNA ligase, cytoplasmic	46	6.39043	6.11517	6.3075	6.34142	6.3879	5.67046	6.3258	6.22728	6.53903	6.07	6.26835	6.37023	6.297	6.18729	6.11035	6.39178	6.28863	1.01619	0.972417	1.003	1.00839	1.01579	0.9017	1.00591	0.990244	1.03982	0.965234	0.996775	1.01298	1.00133	0.983885	0.97165	1.0164	0.0231673	-0.0403531	0.00432255	0.0120602	0.022596	-0.14928	0.00850219	-0.0141436	0.0563309	-0.0510492	-0.00466002	0.0185997	0.00191891
Q9NTJ3	SMC4	Structural maintenance of chromosomes protein 4	46	6.27162	6.17424	6.43583	6.45977	6.23904	5.87656	6.44098	6.3518	6.37994	6.11966	6.28457	6.21866	6.06156	6.17022	6.21065	6.30492	6.33536	0.989938	0.974567	1.01586	1.01964	0.984796	0.92758	1.01667	1.00259	1.00704	0.965952	0.991982	0.981579	0.956781	0.973933	0.980314	0.995194	-0.0145896	-0.0371662	0.0226985	0.0280551	-0.0221037	-0.108456	0.0238525	0.00373775	0.0101151	-0.0499762	-0.0116137	-0.026824	-0.0637386
Q15056	EIF4H	Eukaryotic translation initiation factor 4H	46	5.58346	5.79642	5.62985	7.3724	6.02146	5.88916	5.99224	6.87496	6.63224	6.22958	6.35263	5.79941	5.40022	7.04799	7.5729	5.80508	6.09553	0.915992	0.950929	0.923603	1.20948	0.987848	0.966144	0.983054	1.12787	1.08805	1.02199	1.04218	0.95142	0.885931	1.15626	1.24237	0.95235	-0.126593	-0.0725901	-0.114656	0.274382	-0.0176389	-0.0496904	-0.0246569	0.173599	0.121744	0.0313826	0.0596017	-0.0718461	-0.174734
P61160	ACTR2	Actin-related protein 2	46	6.21986	6.13599	6.32724	6.12243	6.334	6.26856	6.22091	6.21732	6.41891	6.21821	6.26632	6.17059	6.37199	6.46791	6.13439	6.10536	6.20138	1.00298	0.989456	1.0203	0.987269	1.02139	1.01083	1.00315	1.00257	1.03508	1.00271	1.01047	0.995035	1.02751	1.04298	0.989198	0.984516	0.00429281	-0.0152932	0.028987	-0.0184849	0.0305276	0.0155448	0.00453634	0.00370354	0.049739	0.00391004	0.0150291	-0.00718086	0.0391547
Q9Y5K5	UCHL5	Ubiquitin carboxyl-terminal hydrolase isozyme L5	46	6.35975	6.28123	6.28088	6.14887	6.47157	5.98423	6.17826	6.4011	6.27686	6.22897	6.39931	6.38345	6.20989	6.09535	6.05967	6.2406	6.26768	1.01469	1.00216	1.00211	0.981044	1.03253	0.954776	0.985733	1.02129	1.00146	0.993823	1.021	1.01847	0.990779	0.972505	0.966812	0.995679	0.021038	0.003115	0.00303461	-0.0276108	0.0461837	-0.0667665	-0.0207315	0.0303877	0.00211093	-0.00893848	0.0299843	0.0264043	-0.0133644
Q9Y3I0	RTCB	RNA-splicing ligase RtcB homolog	46	6.3658	6.06726	6.37387	6.47679	6.28702	6.0983	6.29599	6.18965	6.24104	6.14462	6.18069	6.17977	6.42689	6.20117	6.12417	6.34696	6.32093	1.0071	0.959868	1.00838	1.02466	0.994635	0.964779	0.996054	0.979231	0.987361	0.972107	0.977813	0.977668	1.01676	0.981053	0.968872	1.00412	0.010205	-0.0590917	0.0120328	0.0351421	-0.00776049	-0.0517297	-0.00570359	-0.030279	-0.0183504	-0.040813	-0.0323689	-0.0325837	0.0239839
P30086	PEBP1	Phosphatidylethanolamine-binding protein 1	46	6.42188	6.38639	6.08511	6.07844	6.3065	6.37137	6.14836	5.93346	6.21647	6.14601	6.36522	6.21672	6.40632	6.06741	6.40807	6.44226	6.24296	1.02866	1.02298	0.974716	0.973648	1.01018	1.02057	0.984848	0.950425	0.995758	0.984471	1.01958	0.995798	1.02617	0.971881	1.02645	1.03192	0.0407666	0.0327716	-0.0369457	-0.038528	0.0146105	0.0293746	-0.0220274	-0.0733554	-0.00613348	-0.022579	0.0279813	-0.00607547	0.0372668
Q8TEX9-2	IPO4	Isoform 2 of Importin-4	45	6.26533	6.05141	6.32004	6.25528	6.33246	6.18953	6.20257	6.33406	6.19439	6.24904	6.31935	6.47002	6.39414	5.99959	6.10849	6.3143	6.22301	1.0068	0.972424	1.01559	1.00518	1.01759	0.994619	0.996715	1.01784	0.9954	1.00418	1.01548	1.03969	1.0275	0.964097	0.981597	1.01467	0.00977678	-0.0403424	0.02232	0.00746074	0.0251523	-0.00778386	-0.00474761	0.0255168	-0.00665151	0.00602085	0.0221624	0.0561564	0.0391366
P31153	MAT2A	S-adenosylmethionine synthase isoform type-2	45	6.31363	6.31856	6.40726	6.09398	6.23002	6.0086	6.38053	6.18787	6.53785	6.34169	6.26049	6.27405	6.16074	6.22944	6.17457	6.08073	6.28336	1.00482	1.0056	1.01972	0.96986	0.991511	0.956272	1.01547	0.984803	1.0405	1.00928	0.996361	0.998519	0.980485	0.991419	0.982686	0.967752	0.00693405	0.00806014	0.0281719	-0.0441509	-0.0122989	-0.0645068	0.0221406	-0.0220928	0.0572806	0.0133317	-0.00526009	-0.00213864	-0.028432
Q14203	DCTN1	Dynactin subunit 1	45	6.49939	6.47993	6.23866	6.3378	6.29456	6.3174	6.11272	6.26727	5.99815	6.14867	6.30791	6.15351	6.06851	6.04845	6.25401	6.47306	6.38894	1.01729	1.01424	0.976477	0.991995	0.985227	0.988802	0.956765	0.980955	0.938833	0.962392	0.987316	0.96315	0.949845	0.946706	0.97888	1.01317	0.0247266	0.0204005	-0.0343415	-0.0115956	-0.0214722	-0.0162468	-0.0637632	-0.0277406	-0.0910601	-0.0553033	-0.0184156	-0.0541682	-0.0742354
P61088	UBE2N	Ubiquitin-conjugating enzyme E2 N	45	5.94604	6.18335	5.64805	6.10499	5.73889	10.5462	5.82768	5.69268	5.8502	6.05957	5.7484	5.63992	6.05514	6.02773	6.88466	6.04649	5.97061	0.995885	1.03563	0.945976	1.02251	0.96119	1.76635	0.976061	0.953451	0.979833	1.0149	0.962783	0.944614	1.01416	1.00957	1.15309	1.01271	-0.00594856	0.0505109	-0.0801249	0.0321112	-0.057106	0.820774	-0.0349561	-0.0687697	-0.0293918	0.0213377	-0.0547173	-0.082203	0.0202826
O43396	TXNL1	Thioredoxin-like protein 1	45	6.38927	6.28448	6.03384	6.44742	6.27582	6.14188	6.30618	6.44602	5.81586	6.20765	6.30208	6.08452	5.88833	6.16589	6.54494	6.66583	6.28875	1.01598	0.999321	0.959465	1.02523	0.997944	0.976645	1.00277	1.02501	0.924803	0.987104	1.00212	0.967524	0.936327	0.980463	1.04074	1.05996	0.0228772	-0.000980482	-0.0596974	0.0359481	-0.00296988	-0.0340935	0.00399249	0.0356348	-0.112781	-0.0187266	0.00305421	-0.0476304	-0.0949153
Q9UPU5	USP24	Ubiquitin carboxyl-terminal hydrolase 24	45	6.38658	6.21441	6.34577	6.31607	6.43908	6.07568	6.12607	6.4051	6.20427	6.10456	6.33946	6.2363	6.25816	5.91812	6.28441	6.34596	6.31571	1.01122	0.983961	1.00476	1.00006	1.01953	0.961995	0.969974	1.01415	0.982356	0.966568	1.00376	0.987427	0.990888	0.937048	0.995044	1.00479	0.0160992	-0.0233269	0.00685088	8.28034e-05	0.0279102	-0.0558985	-0.0439825	0.0202767	-0.0256829	-0.049057	0.0054156	-0.018254	-0.0132058
Q9Y2Q3-2	GSTK1	Isoform 2 of Glutathione S-transferase kappa 1	45	6.30878	6.33727	6.28782	6.04018	6.44073	6.12997	6.03385	6.06155	6.47579	6.23343	6.19065	6.3225	6.24131	6.15536	6.44242	6.2984	6.24351	1.01045	1.01502	1.0071	0.967433	1.03159	0.981814	0.966419	0.970856	1.0372	0.998385	0.991533	1.01265	0.999647	0.985881	1.03186	1.00879	0.0150031	0.0215036	0.010202	-0.0477664	0.0448663	-0.0264779	-0.0492791	-0.0426711	0.0526983	-0.00233166	-0.012267	0.0181372	-0.000509024
P28070	PSMB4	Proteasome subunit beta type-4	45	6.12809	6.15978	6.37926	5.97359	6.28594	6.12572	6.50893	6.3375	6.32936	6.25449	6.37471	6.38012	6.01153	6.51622	6.11816	6.1166	6.16018	0.994791	0.999935	1.03556	0.96971	1.02041	0.994406	1.05661	1.02878	1.02746	1.01531	1.03483	1.0357	0.975869	1.0578	0.993179	0.992926	-0.00753502	-9.36818e-05	0.0504166	-0.0443743	0.029156	-0.00809308	0.0794479	0.0409413	0.0390871	0.0219197	0.0493872	0.0506111	-0.0352403
P52888	THOP1	Thimet oligopeptidase	45	6.52753	6.53983	6.26527	6.03126	6.43749	5.974	6.28976	6.20244	6.29265	6.34793	6.15776	6.08001	6.25256	6.37734	5.99703	6.22714	6.34097	1.02942	1.03136	0.988061	0.951157	1.01522	0.942127	0.991924	0.978153	0.992379	1.0011	0.971107	0.958845	0.986057	1.00574	0.945759	0.982048	0.0418331	0.044549	-0.0173274	-0.0722447	0.0217942	-0.0860069	-0.0116992	-0.0318682	-0.0110364	0.0015821	-0.0422985	-0.0606304	-0.0202571
Q9UNX3	RPL26L1	60S ribosomal protein L26-like 1	45	6.16941	6.4441	6.00704	6.52265	6.35761	6.62199	5.98102	6.1884	5.79958	6.48439	6.18457	5.88266	6.12855	6.58474	6.57565	6.06764	6.2858	0.981484	1.02518	0.955652	1.03768	1.01142	1.05348	0.951513	0.984505	0.922648	1.03159	0.983895	0.935865	0.974983	1.04756	1.04611	0.965293	-0.0269638	0.0358825	-0.0654421	0.0533618	0.0163881	0.0751685	-0.0717048	-0.0225299	-0.116148	0.0448745	-0.0234231	-0.0956277	-0.0365506
Q14444	CAPRIN1	Caprin-1	45	6.02403	6.33768	6.0663	6.30935	6.09814	7.48337	5.95424	6.32839	6.01331	6.32019	6.08621	5.84517	6.05451	6.10602	6.86305	6.11006	6.18434	0.974078	1.02479	0.980913	1.02021	0.986062	1.21005	0.962793	1.02329	0.972345	1.02197	0.984133	0.945157	0.979007	0.987336	1.10975	0.987989	-0.0378907	0.0353352	-0.0278028	0.0288717	-0.0202504	0.275068	-0.0547023	0.0332189	-0.0404603	0.0313483	-0.0230755	-0.0813747	-0.0306094
Q9Y262	EIF3L	Eukaryotic translation initiation factor 3 subunit L	45	6.33367	6.34532	6.48499	6.32669	6.277	6.18998	6.25761	6.2175	6.12593	6.28951	6.11276	6.23271	6.1835	6.11454	6.16631	6.34197	6.37267	0.993881	0.995709	1.01763	0.992785	0.984988	0.971333	0.981945	0.975651	0.961282	0.986951	0.959215	0.978038	0.970316	0.959495	0.967618	0.995183	-0.00885569	-0.00620447	0.025207	-0.0104465	-0.0218222	-0.0419626	-0.0262856	-0.0355628	-0.0569685	-0.0189498	-0.0600735	-0.0320378	-0.0434737
P38117	ETFB	Electron transfer flavoprotein subunit beta	45	6.17794	6.06474	6.45491	6.10556	6.38283	6.55876	6.39468	6.13435	6.48826	6.48342	6.12463	6.10679	5.92707	6.44461	6.05088	6.10056	6.20079	0.996315	0.97806	1.04098	0.984643	1.02936	1.05773	1.03127	0.989286	1.04636	1.04558	0.987718	0.984841	0.955858	1.03932	0.975824	0.983836	-0.00532559	-0.0320057	0.0579455	-0.0223278	0.0417448	0.0809716	0.0444207	-0.015541	0.0653802	0.0643036	-0.0178288	-0.0220372	-0.0651324
Q14847	LASP1	LIM and SH3 domain protein 1	45	6.32742	6.11209	6.13655	6.33169	6.10667	6.27116	6.17607	6.02517	6.18461	6.19894	6.60097	6.31102	6.58472	5.98305	6.36762	6.28227	6.22694	1.01614	0.981556	0.985484	1.01682	0.980686	1.0071	0.991831	0.967598	0.993203	0.995504	1.06007	1.0135	1.05746	0.960833	1.02259	1.00889	0.0230946	-0.026857	-0.021095	0.0240678	-0.0281369	0.0102095	-0.0118337	-0.0475209	-0.00984018	-0.00650126	0.0841552	0.0193504	0.0805993
Q8TAQ2	SMARCC2	SWI/SNF complex subunit SMARCC2	44	6.16833	6.14028	6.55325	6.27599	6.23705	6.11654	6.37829	6.16772	6.51492	6.22412	6.38997	6.29065	6.1705	6.11182	6.16014	6.10041	6.28446	0.981521	0.977057	1.04277	0.998652	0.992456	0.97328	1.01493	0.981424	1.03667	0.990398	1.01679	1.00098	0.981866	0.972529	0.980217	0.970713	-0.0269094	-0.0334849	0.0604212	-0.0019463	-0.0109255	-0.0390736	0.0213803	-0.0270521	0.0519581	-0.0139195	0.0240198	0.00141974	-0.026402
Q9H2G2-2	SLK	Isoform 2 of STE20-like serine/threonine-protein kinase	44	5.36789	5.31584	5.77413	5.50634	5.77807	5.32027	5.93553	5.78412	6.71913	6.60391	6.54593	6.55552	7.13529	7.31673	7.19233	7.14896	5.49105	0.977571	0.968092	1.05155	1.00278	1.05227	0.968898	1.08095	1.05337	1.22365	1.20267	1.19211	1.19386	1.29944	1.33248	1.30983	1.30193	-0.0327269	-0.0467844	0.0725215	0.00401165	0.0735056	-0.0455826	0.112295	0.0750154	0.291192	0.266238	0.253516	0.255628	0.37789
Q7Z5K2-3	WAPL	Isoform 3 of Wings apart-like protein homolog	44	6.18591	6.25113	6.49682	6.34586	6.14974	6.01329	6.38439	6.19198	5.96867	6.07168	6.45109	6.38076	6.08751	6.04932	6.37723	6.59462	6.31993	0.978794	0.989114	1.02799	1.0041	0.973071	0.95148	1.0102	0.979755	0.94442	0.96072	1.02075	1.00963	0.963224	0.957181	1.00907	1.04346	-0.0309227	-0.0157916	0.0398252	0.00590711	-0.0393832	-0.071754	0.0146402	-0.0295078	-0.0824991	-0.0578128	0.0296344	0.0138197	-0.0540563
P11766	ADH5	Alcohol dehydrogenase class-3	44	6.27618	6.14712	6.35994	6.3095	6.41328	5.90672	6.44414	6.30518	5.97991	6.28291	6.31912	6.07987	6.29555	6.38562	6.12011	6.37484	6.27318	1.00048	0.979904	1.01383	1.00579	1.02233	0.941582	1.02725	1.0051	0.953249	1.00155	1.00732	0.969184	1.00357	1.01792	0.975599	1.0162	0.00068862	-0.0292875	0.019815	0.00832757	0.0318643	-0.0868409	0.0387897	0.00733945	-0.0690743	0.00223481	0.0105256	-0.0451576	0.00513431
P62241	RPS8	40S ribosomal protein S8	44	6.13434	6.10279	6.14354	6.25386	6.31237	5.9199	6.34359	6.52546	6.60804	6.30522	6.33536	6.02118	6.00984	6.41384	6.48234	6.08833	6.15863	0.996056	0.990933	0.997549	1.01546	1.02496	0.961236	1.03003	1.05956	1.07297	1.0238	1.0287	0.977681	0.97584	1.04144	1.05256	0.988585	-0.00570191	-0.0131411	-0.00353984	0.0221369	0.0355717	-0.0570372	0.0426895	0.0834696	0.101612	0.0339367	0.0408166	-0.0325638	-0.0352835
P62993	GRB2	Growth factor receptor-bound protein 2	44	6.31531	6.20709	6.16244	6.05302	6.20526	5.84023	6.42573	6.07952	6.53772	6.37819	6.46034	6.40134	6.0317	6.53525	5.98519	6.38167	6.18447	1.02116	1.00366	0.996439	0.978746	1.00336	0.944339	1.03901	0.983031	1.05712	1.03132	1.04461	1.03507	0.975299	1.05672	0.967778	1.03189	0.0302048	0.00526827	-0.0051471	-0.0309937	0.00484286	-0.0826236	0.0552116	-0.0246914	0.0801388	0.0444983	0.0629613	0.0497251	-0.0360841
P26583	HMGB2	High mobility group protein B2	44	5.82528	6.07539	5.98414	6.17113	6.09401	8.99842	5.94777	5.76055	6.10143	6.41373	6.09315	5.89676	5.9333	6.49876	6.47928	5.7269	6.01398	0.968622	1.01021	0.995037	1.02613	1.01331	1.49625	0.98899	0.957859	1.01454	1.06647	1.01316	0.980508	0.986584	1.08061	1.07737	0.952264	-0.0459939	0.0146558	-0.00717734	0.0372134	0.0190706	0.58135	-0.0159724	-0.0621147	0.0208261	0.0928424	0.018867	-0.0283988	-0.0194865
O00161	SNAP23	Synaptosomal-associated protein 23	44	6.53276	6.39904	5.96863	6.30406	6.54673	6.2515	6.16157	6.16451	6.17508	5.97077	6.41689	6.19434	6.08828	5.95298	6.36982	6.50303	6.30112	1.03676	1.01554	0.947233	1.00047	1.03898	0.992125	0.977853	0.978319	0.979997	0.947572	1.01837	0.983053	0.966221	0.944749	1.0109	1.03204	0.0520838	0.0222466	-0.078209	0.000672409	0.0551656	-0.0114065	-0.0323109	-0.0316226	-0.029151	-0.0776919	0.0262654	-0.0246583	-0.0495741
O95202	LETM1	Mitochondrial proton/calcium exchanger protein	44	6.04883	6.21786	5.99883	6.41542	6.27905	6.91639	6.12197	6.31813	6.07865	6.563	6.1653	5.96552	6.06168	6.12631	6.64152	6.08155	6.17024	0.980324	1.00772	0.972221	1.03974	1.01764	1.12093	0.992178	1.02397	0.985157	1.06365	0.9992	0.966822	0.982407	0.992881	1.07638	0.985627	-0.0286693	0.0110927	-0.0406443	0.0562183	0.0252209	0.164694	-0.0113295	0.0341722	-0.0215745	0.08903	-0.00115434	-0.0486775	-0.0256077
Q9BWU0	SLC4A1AP	Kanadaptin	44	6.10109	6.17475	6.31406	6.23886	6.23659	6.40491	6.29256	6.2196	6.21379	6.52677	6.20326	6.29923	6.14914	6.32134	6.13903	6.16503	6.20719	0.982907	0.994774	1.01722	1.0051	1.00474	1.03185	1.01375	1.002	1.00106	1.05149	0.999367	1.01483	0.990648	1.01839	0.989019	0.993208	-0.0248733	-0.00755958	0.0246277	0.00734213	0.00681711	0.045238	0.0197068	0.00288149	0.00153318	0.0724289	-0.000913713	0.0212352	-0.0135557
P22059	OSBP	Oxysterol-binding protein 1	44	6.38966	6.33076	6.43399	6.20452	6.30344	5.99175	6.31182	6.25605	5.89489	6.28312	6.34715	6.21027	6.2399	6.18302	6.14373	6.47594	6.33973	1.00788	0.998585	1.01487	0.978672	0.994275	0.945111	0.995597	0.9868	0.929833	0.99107	1.00117	0.979579	0.984253	0.975281	0.969083	1.02148	0.0113172	-0.00204326	0.0212917	-0.0311024	-0.0082826	-0.0814445	-0.00636591	-0.0191699	-0.104957	-0.0129408	0.00168697	-0.029766	-0.0228991
Q6PKG0	LARP1	La-related protein 1	44	6.37255	6.38601	6.33562	6.69167	6.22335	6.28534	6.14197	6.33328	5.94283	6.07639	6.26105	5.90927	6.18413	6.00172	6.49339	6.36143	6.44646	0.988534	0.990622	0.982806	1.03804	0.96539	0.975006	0.952766	0.982443	0.921875	0.942593	0.971238	0.916669	0.959306	0.93101	1.00728	0.986809	-0.0166369	-0.0135929	-0.0250219	0.0538586	-0.0508163	-0.0365169	-0.0698062	-0.0255548	-0.117358	-0.0852932	-0.0421031	-0.125528	-0.0599371
P31689	DNAJA1	DnaJ homolog subfamily A member 1	44	6.32874	6.10733	6.62942	6.15422	6.22309	5.28999	6.63456	6.1377	6.44471	6.14832	6.41985	6.56305	6.20321	6.3338	5.95963	6.42239	6.30493	1.00378	0.96866	1.05147	0.976097	0.98702	0.839025	1.05228	0.973477	1.02217	0.975161	1.01823	1.04094	0.983867	1.00458	0.945234	1.01863	0.00543852	-0.045938	0.0724029	-0.0349038	-0.0188487	-0.253215	0.073521	-0.0387817	0.0316357	-0.0362875	0.0260598	0.0578866	-0.0234648
Q9BZZ5	API5	Apoptosis inhibitor 5	44	6.32784	6.09421	6.38406	6.13035	6.25467	5.74455	6.55447	6.3049	6.42687	6.2946	6.31829	6.22882	6.33831	6.33735	6.03895	6.22175	6.23412	1.01503	0.977558	1.02405	0.983355	1.0033	0.92147	1.05139	1.01135	1.03092	1.0097	1.0135	0.999151	1.01671	1.01656	0.968694	0.998017	0.0215284	-0.0327456	0.0342894	-0.0242153	0.004749	-0.117991	0.0722944	0.0162887	0.0439315	0.0139299	0.0193494	-0.00122589	0.0239135
Q14676	MDC1	Mediator of DNA damage checkpoint protein 1	43	6.12895	5.97894	6.45497	6.24928	6.13788	5.91472	6.51646	6.32614	6.47884	6.22419	6.19151	6.34665	6.3799	6.40449	6.18661	6.08045	6.20303	0.988057	0.963873	1.04061	1.00746	0.989496	0.95352	1.05053	1.01985	1.04446	1.00341	0.998142	1.02315	1.02851	1.03248	0.997352	0.980238	-0.0173343	-0.0530845	0.0574361	0.0107157	-0.0152338	-0.0686644	0.0711142	0.0283512	0.0627613	0.00491184	-0.00268296	0.033021	0.0405595
P28838	LAP3	Cytosol aminopeptidase	43	5.66142	8.10192	6.10503	4.95751	6.1191	4.83806	7.97312	5.82934	8.50149	5.42337	5.99979	6.9096	6.15316	6.79066	4.68547	5.95096	6.20647	0.91218	1.3054	0.983656	0.798765	0.985923	0.779519	1.28465	0.939236	1.36978	0.873825	0.966699	1.11329	0.991411	1.09413	0.754933	0.958832	-0.132609	0.384491	-0.0237746	-0.324157	-0.0204535	-0.359344	0.361371	-0.0904404	0.453943	-0.194583	-0.0488609	0.154829	-0.0124454
O00151	PDLIM1	PDZ and LIM domain protein 1	43	6.19797	6.1248	6.26229	6.18761	6.33012	6.11664	6.30758	6.15266	6.51422	6.25966	6.1697	6.25574	6.22873	6.286	6.28677	6.3195	6.19317	1.00078	0.988961	1.01116	0.999103	1.02211	0.987643	1.01847	0.993459	1.05184	1.01074	0.996211	1.0101	1.00574	1.01499	1.01511	1.0204	0.00111831	-0.0160147	0.0160129	-0.0012952	0.0315554	-0.0179381	0.0264091	-0.0094672	0.072915	0.0154068	-0.00547713	0.0145031	0.00826057
Q92922	SMARCC1	SWI/SNF complex subunit SMARCC1	43	6.08989	6.22857	6.37956	6.46512	6.21976	6.00357	6.32611	6.2751	6.26905	6.27134	6.37721	6.20703	5.99049	6.32238	6.30576	6.26904	6.29078	0.968065	0.99011	1.01411	1.02771	0.98871	0.954344	1.00562	0.997507	0.996545	0.996909	1.01374	0.986686	0.952264	1.00502	1.00238	0.996543	-0.0468239	-0.0143391	0.0202169	0.0394371	-0.0163811	-0.0674194	0.00807859	-0.00360161	-0.00499322	-0.00446632	0.0196853	-0.0193369	-0.070566
Q641Q2	WASHC2A	WASH complex subunit 2A	43	6.15905	6.15273	6.43744	6.2778	6.12468	5.85928	6.54314	6.21564	6.49301	6.35653	6.2325	6.2813	6.28467	6.35061	6.02194	6.2097	6.25675	0.984384	0.983374	1.02888	1.00336	0.978891	0.936473	1.04577	0.993429	1.03776	1.01595	0.996123	1.00392	1.00446	1.015	0.96247	0.992479	-0.0227068	-0.0241879	0.0410725	0.00484446	-0.0307801	-0.0946912	0.0645685	-0.00951166	0.0534728	0.0228248	-0.00560363	0.00564856	0.00642238
Q9BSL1	UBAC1	Ubiquitin-associated domain-containing protein 1	43	6.32131	5.91353	6.6266	5.91589	6.22486	5.46561	6.65974	6.29834	6.75872	6.25723	6.38258	6.4481	6.44157	6.42877	5.79031	6.06684	6.19433	1.0205	0.954668	1.06978	0.955049	1.00493	0.882357	1.07513	1.01679	1.09111	1.01015	1.03039	1.04097	1.03991	1.03785	0.934775	0.979418	0.0292747	-0.0669292	0.09732	-0.0663536	0.00709256	-0.180566	0.104517	0.0240228	0.125801	0.0145753	0.0431909	0.0579253	0.0564635
Q14019	COTL1	Coactosin-like protein	43	6.21873	6.28868	6.02506	6.43382	6.40844	6.87907	6.21687	6.2745	6.08383	6.14784	6.16395	6.06284	5.97313	6.33087	6.53965	5.95271	6.24157	0.99634	1.00755	0.965311	1.0308	1.02673	1.10214	0.996042	1.00528	0.974727	0.984983	0.987564	0.971364	0.956991	1.01431	1.04776	0.95372	-0.00528957	0.0108477	-0.0509339	0.043766	0.0380637	0.140304	-0.00572114	0.00759095	-0.0369297	-0.0218299	-0.0180544	-0.0419158	-0.0634224
P49959-3	MRE11	Isoform 3 of Double-strand break repair protein MRE11	43	5.9975	6.18507	5.92585	5.98743	6.2442	8.44887	5.94918	5.92911	5.90434	6.71491	6.15575	5.7456	5.92114	6.15885	6.78304	5.94917	6.02396	0.995607	1.02674	0.983713	0.993935	1.03656	1.40254	0.987586	0.984254	0.980142	1.1147	1.02188	0.953791	0.982931	1.02239	1.12601	0.987584	-0.00635154	0.0380771	-0.0236907	-0.0087759	0.051804	0.488046	-0.018022	-0.0228972	-0.028937	0.156655	0.0312219	-0.0682552	-0.0248378
Q7L1Q6-3	BZW1	Isoform 3 of Basic leucine zipper and W2 domain-containing protein 1	43	5.98298	6.10105	6.10494	6.17352	6.25785	7.26042	6.07846	6.19559	6.01372	6.564	6.11369	5.9475	6.23945	6.26105	6.70321	6.00255	6.09062	0.982327	1.00171	1.00235	1.01361	1.02746	1.19207	0.998003	1.01723	0.987374	1.07772	1.00379	0.976501	1.02444	1.02798	1.10058	0.98554	-0.0257254	0.00246787	0.00338743	0.0195036	0.0390774	0.253463	-0.00288383	0.024652	-0.018332	0.107986	0.00545371	-0.0343063	0.0348292
O95721	SNAP29	Synaptosomal-associated protein 29	43	6.25592	6.32525	6.1284	6.23303	6.20159	6.83369	6.15288	6.07067	6.08158	6.20074	6.17808	6.17735	6.1327	6.2162	6.48934	6.32258	6.23565	1.00325	1.01437	0.982801	0.99958	0.994538	1.09591	0.986726	0.973542	0.975292	0.994402	0.990768	0.990651	0.98349	0.996881	1.04068	1.01394	0.00468211	0.0205825	-0.0250295	-0.000606297	-0.0079018	0.132125	-0.0192781	-0.0386842	-0.0360938	-0.00809956	-0.0133814	-0.0135519	-0.0240176
Q9UKV3	ACIN1	Apoptotic chromatin condensation inducer in the nucleus	43	6.22124	6.2904	6.36678	6.15564	6.21074	6.01264	6.44493	6.29665	6.24069	6.42709	6.27725	6.34542	6.14171	6.33555	6.10839	6.12486	6.25851	0.994044	1.00509	1.0173	0.983562	0.992366	0.960714	1.02979	1.00609	0.997152	1.02694	1.00299	1.01389	0.981337	1.01231	0.976013	0.978644	-0.00861822	0.00733138	0.0247435	-0.0239115	-0.0110552	-0.0578218	0.0423443	0.0087641	-0.00411483	0.0383453	0.00431229	0.0198953	-0.02718
A3KN83	SBNO1	Protein strawberry notch homolog 1	43	6.25258	6.22599	6.38075	6.35798	6.27279	6.00059	6.30592	6.29623	6.19944	6.38956	6.27195	6.34515	6.34141	6.06492	6.1522	6.14255	6.30433	0.991792	0.987574	1.01212	1.00851	0.994998	0.951821	1.00025	0.998716	0.983363	1.01352	0.994865	1.00648	1.00588	0.962025	0.97587	0.974339	-0.0118903	-0.0180387	0.0173841	0.0122266	-0.00723465	-0.0712376	0.000364957	-0.00185367	-0.024204	0.0193747	-0.00742785	0.00931236	0.00846175
Q9UJS0-2	SLC25A13	Isoform 2 of Calcium-binding mitochondrial carrier protein Aralar2	43	6.20975	5.88136	6.49716	6.19545	6.197	5.90878	6.43219	6.2929	6.56119	6.20136	6.21628	6.53029	6.33992	6.28782	5.9474	6.30115	6.19593	1.00223	0.94923	1.04862	0.999923	1.00017	0.953655	1.03813	1.01565	1.05895	1.00088	1.00328	1.05396	1.02324	1.01483	0.959888	1.01698	0.00321434	-0.075171	0.0684884	-0.00011177	0.000249123	-0.0684606	0.0539892	0.0224042	0.0826367	0.0012638	0.00473064	0.0758262	0.0331438
P28066	PSMA5	Proteasome subunit alpha type-5	43	5.99581	5.93324	6.35873	5.66729	6.2537	6.07684	6.57088	6.30724	7.32949	6.55001	6.15675	6.31384	6.09826	6.69805	5.89934	5.79053	5.98877	1.00118	0.990728	1.06178	0.94632	1.04424	1.01471	1.0972	1.05318	1.22387	1.09372	1.02805	1.05428	1.01828	1.11844	0.985067	0.966898	0.00169554	-0.013439	0.0864795	-0.0796001	0.0624509	0.0210622	0.133827	0.0747497	0.291454	0.129238	0.0399099	0.0762586	0.0261385
P22061-2	PCMT1	Isoform 2 of Protein-L-isoaspartate(D-aspartate) O-methyltransferase	43	6.6077	6.43137	5.81852	6.39717	6.423	6.8374	5.79189	6.22485	5.82534	6.05468	6.24605	6.07202	6.30697	5.76222	6.77649	6.42434	6.31369	1.04657	1.01864	0.921572	1.01322	1.01731	1.08295	0.917354	0.985929	0.922652	0.958976	0.989287	0.961723	0.998936	0.912655	1.0733	1.01753	0.0656648	0.0266427	-0.117831	0.0189504	0.0247639	0.114964	-0.124449	-0.0204444	-0.116141	-0.0604327	-0.0155393	-0.0563069	-0.00153636
Q9NR45	NANS	Sialic acid synthase	43	6.27021	6.05636	6.26838	6.48591	6.32869	6.21106	6.07327	6.26295	6.06592	6.23936	6.33509	6.09598	6.81442	6.00115	6.28827	6.20297	6.27022	0.999999	0.965894	0.999707	1.0344	1.00933	0.990566	0.96859	0.998841	0.967418	0.995079	1.01035	0.972212	1.08679	0.957088	1.00288	0.989275	-1.15044e-06	-0.0500639	-0.000422271	0.0487941	0.013392	-0.0136754	-0.0460414	-0.00167255	-0.0477884	-0.00711686	0.0148502	-0.0406567	0.120076
Q4V328	GRIPAP1	GRIP1-associated protein 1	43	6.23131	6.21339	6.34839	6.0073	6.32734	6.15697	6.3296	6.1835	6.35734	6.48634	6.38957	6.23281	6.20873	6.24727	6.21484	6.06531	6.2001	1.00503	1.00214	1.02392	0.968904	1.02052	0.993044	1.02089	0.997323	1.02536	1.04617	1.03056	1.00528	1.00139	1.00761	1.00238	0.97826	0.00724459	0.00308971	0.0340999	-0.0455742	0.0293082	-0.0100704	0.0298234	-0.00386724	0.0361323	0.0651137	0.0434279	0.00759183	0.00200729
Q13617-2	CUL2	Isoform 2 of Cullin-2	43	6.30582	6.30696	6.20829	6.33299	6.35156	6.07553	6.12065	6.22405	6.11431	6.09644	6.30709	6.32405	6.61933	6.00374	6.27931	6.32988	6.28851	1.00275	1.00293	0.987243	1.00707	1.01003	0.966131	0.973306	0.989749	0.972298	0.969456	1.00295	1.00565	1.05261	0.954715	0.998536	1.00658	0.00396462	0.00422541	-0.0185234	0.0101674	0.0143916	-0.0497091	-0.0390345	-0.0148657	-0.0405297	-0.0447523	0.00425515	0.0081294	0.0739658
O43491	EPB41L2	Band 4.1-like protein 2	43	6.0277	6.02449	6.34247	6.32887	6.36273	6.10082	6.25525	6.3383	6.36849	6.32234	6.34277	6.22585	6.23894	6.28617	6.29623	6.13859	6.18088	0.975217	0.974697	1.02614	1.02394	1.02942	0.987047	1.01203	1.02547	1.03035	1.02289	1.02619	1.00728	1.00939	1.01703	1.01866	0.993158	-0.0362052	-0.0369737	0.037232	0.0341351	0.0418331	-0.0188097	0.0172547	0.0362831	0.0431385	0.0326458	0.0373002	0.010458	0.0134881
P51659	HSD17B4	Peroxisomal multifunctional enzyme type 2	43	6.20662	6.0683	6.37704	6.12897	6.25264	5.81779	6.27838	6.31578	6.75447	6.32669	6.13867	6.3355	6.52004	6.34517	5.92885	6.20511	6.19523	1.00184	0.979511	1.02935	0.989304	1.00927	0.939075	1.01342	1.01946	1.09027	1.02122	0.99087	1.02264	1.05243	1.0242	0.957002	1.00159	0.00264939	-0.029866	0.0417285	-0.0155138	0.013307	-0.0906872	0.0192339	0.0278025	0.124684	0.0302925	-0.0132323	0.0323001	0.0737224
Q08J23	NSUN2	RNA cytosine C(5)-methyltransferase NSUN2	43	6.21518	6.08041	6.46857	6.30009	6.46999	5.92118	6.3209	6.35501	6.34308	6.43632	6.40157	6.22319	6.216	6.0439	6.08467	6.11994	6.26606	0.99188	0.970372	1.03232	1.00543	1.03254	0.94496	1.00875	1.0142	1.01229	1.02717	1.02163	0.993158	0.992011	0.964545	0.971052	0.97668	-0.011763	-0.0433906	0.0458877	0.00781328	0.0462043	-0.0816744	0.0125708	0.0203352	0.0176244	0.0386769	0.0308666	-0.00990487	-0.0115727
O15372	EIF3H	Eukaryotic translation initiation factor 3 subunit H	43	6.35088	6.30901	6.42677	6.02804	6.24905	5.71907	6.53259	6.30151	6.32743	6.33256	6.29629	6.30432	6.19053	6.34434	5.93967	6.34795	6.27868	1.0115	1.00483	1.02359	0.960082	0.995282	0.910872	1.04044	1.00364	1.00777	1.00858	1.00281	1.00408	0.985961	1.01046	0.946007	1.01103	0.0164964	0.0069535	0.0336337	-0.0587711	-0.00682325	-0.13468	0.057195	0.00523744	0.0111595	0.0123287	0.00404185	0.00588063	-0.0203972
P32322-3	PYCR1	Isoform 3 of Pyrroline-5-carboxylate reductase 1, mitochondrial	43	6.04482	6.06845	5.92806	6.0079	6.21143	6.79312	6.05245	6.42781	5.98008	6.40537	6.29414	6.22742	6.34573	6.48763	6.48589	6.2397	6.01231	1.00541	1.00934	0.985987	0.999267	1.03312	1.12987	1.00668	1.06911	0.99464	1.06538	1.04688	1.03578	1.05546	1.07906	1.07877	1.03782	0.00778058	0.0134093	-0.0203587	-0.001058	0.0470066	0.176156	0.00960046	0.0964085	-0.00775401	0.0913631	0.0660905	0.0507158	0.0778673
P26373	RPL13	60S ribosomal protein L13	43	5.823	6.07369	5.84888	6.22372	6.1838	8.22361	5.7958	5.94153	5.74388	6.95205	6.15318	5.66609	5.68329	6.62999	7.03883	6.01867	5.99232	0.971743	1.01358	0.976062	1.03862	1.03195	1.37236	0.967204	0.991524	0.95854	1.16016	1.02684	0.945558	0.948429	1.10641	1.17464	1.0044	-0.0413527	0.019458	-0.0349549	0.0546619	0.0453784	0.456657	-0.0481075	-0.0122808	-0.0610897	0.214323	0.0382169	-0.0807618	-0.0763889
Q6NUK1	SLC25A24	Calcium-binding mitochondrial carrier protein SCaMC-1	43	6.43255	6.35017	6.16904	6.14295	6.46971	5.96684	6.25307	6.42148	6.12579	6.18837	6.12246	6.15167	6.38505	6.26469	6.12197	6.43418	6.27368	1.02532	1.01219	0.983321	0.979163	1.03125	0.951091	0.996715	1.02356	0.976427	0.986402	0.975897	0.980552	1.01775	0.998567	0.975818	1.02558	0.0360794	0.0174838	-0.0242654	-0.0303797	0.0443897	-0.0723443	-0.0047467	0.0335945	-0.0344155	-0.0197519	-0.0351999	-0.0283333	0.0253865
P55036	PSMD4	26S proteasome non-ATPase regulatory subunit 4	42	6.29346	6.30237	6.20876	6.0328	6.38344	6.35749	6.28459	6.32283	6.15896	6.3576	6.27274	6.18808	5.92302	6.34835	6.19011	6.3754	6.20935	1.01355	1.01498	0.999905	0.971567	1.02804	1.02386	1.01212	1.01828	0.991885	1.02388	1.01021	0.996575	0.953888	1.02239	0.996902	1.02674	0.0194117	0.0214528	-0.000136508	-0.0416139	0.0398924	0.0340156	0.017377	0.0261288	-0.0117549	0.0340406	0.0146541	-0.00494982	-0.0681087
P43304	GPD2	Glycerol-3-phosphate dehydrogenase, mitochondrial	42	6.32374	6.32301	6.41554	5.97816	6.22964	6.13471	6.42377	6.20133	6.0082	6.30406	6.36089	6.19383	6.1359	6.36511	6.17628	6.42584	6.26011	1.01016	1.01005	1.02483	0.95496	0.995132	0.979968	1.02614	0.99061	0.959759	1.00702	1.0161	0.989412	0.980158	1.01677	0.986608	1.02647	0.0145895	0.0144229	0.0353821	-0.0664871	-0.00703979	-0.0291934	0.0372317	-0.0136109	-0.0592557	0.0100927	0.0230401	-0.0153568	-0.0289136
P56192	MARS	Methionine--tRNA ligase, cytoplasmic	42	6.17621	6.08393	6.35509	6.35125	6.20382	5.93658	6.26471	6.3001	6.55292	6.27211	6.19196	6.35227	6.25717	6.34809	6.1621	6.19169	6.24162	0.98952	0.974736	1.01818	1.01756	0.993944	0.951128	1.0037	1.00937	1.04987	1.00488	0.992044	1.01773	1.00249	1.01706	0.98726	0.992	-0.0151987	-0.036917	0.025992	0.02512	-0.0087637	-0.0722885	0.0053272	0.0134542	0.0702174	0.00703034	-0.0115244	0.0253517	0.00358977
Q10567	AP1B1	AP-1 complex subunit beta-1	42	6.29587	6.14101	6.36152	6.20813	6.42391	5.53628	6.48996	6.31644	6.47891	6.13774	6.20369	6.4892	6.70896	6.21317	5.83245	6.16277	6.25163	1.00708	0.982305	1.01758	0.993041	1.02756	0.885573	1.03812	1.01037	1.03635	0.981782	0.992331	1.038	1.07315	0.993848	0.932948	0.985786	0.0101728	-0.025757	0.0251385	-0.0100742	0.0392187	-0.175316	0.0539766	0.0148787	0.0515181	-0.0265254	-0.0111064	0.0538077	0.101856
P35612	ADD2	Beta-adducin	42	6.08086	6.7077	6.36705	6.50765	6.13673	5.96083	6.40377	6.31287	6.18764	6.22669	6.13436	6.32613	6.02572	6.20774	6.03045	6.3838	6.41582	0.947792	1.04549	0.992399	1.01431	0.9565	0.929084	0.998123	0.983954	0.964436	0.970522	0.956131	0.986021	0.939198	0.967568	0.939935	0.99501	-0.0773572	0.0641856	-0.0110074	0.0205041	-0.0641624	-0.106119	-0.00271105	-0.0233365	-0.0522433	-0.0431671	-0.0647197	-0.0203093	-0.0904989
Q92896-2	GLG1	Isoform 2 of Golgi apparatus protein 1	42	6.27793	6.2751	6.31532	6.20289	6.33029	5.87975	6.47871	6.46119	6.40696	6.23247	6.3316	6.30539	6.22707	6.17975	5.94138	6.15421	6.26781	1.00161	1.00116	1.00758	0.989642	1.00997	0.938087	1.03365	1.03085	1.0222	0.994362	1.01018	1.006	0.9935	0.98595	0.94792	0.981876	0.0023275	0.001677	0.0108944	-0.0150209	0.0143101	-0.0922066	0.0477451	0.0438385	0.0316785	-0.00815741	0.0146087	0.00862416	-0.00940795
Q14232	EIF2B1	Translation initiation factor eIF-2B subunit alpha	42	6.39539	6.07746	6.32043	6.31538	6.3108	6.1605	6.13712	6.10787	6.13252	6.26088	6.5232	6.26757	6.3477	6.09388	6.21003	6.33929	6.27717	1.01883	0.968185	1.00689	1.00609	1.00536	0.981414	0.97769	0.97303	0.976957	0.997406	1.0392	0.998471	1.01124	0.970801	0.989305	1.0099	0.0269192	-0.0466446	0.00990958	0.00875641	0.00770977	-0.0270657	-0.0325513	-0.0394438	-0.0336331	-0.00374768	0.0554667	-0.00220693	0.0161208
Q9NVA2-2	SEPTIN11	Isoform 2 of Septin-11	42	6.11922	6.18225	6.20023	5.95057	6.35288	6.7243	6.13406	6.18713	6.18654	6.41105	6.24579	6.09395	6.06045	6.47051	6.60159	6.07948	6.11307	1.00101	1.01132	1.01426	0.973418	1.03923	1.09999	1.00343	1.01212	1.01202	1.04875	1.02171	0.996873	0.991393	1.05847	1.07991	0.994506	0.00145127	0.0162355	0.0204252	-0.0388686	0.0555143	0.137488	0.00494578	0.0173738	0.0172363	0.0686642	0.0309876	-0.00451883	-0.0124716
Q9Y6G9	DYNC1LI1	Cytoplasmic dynein 1 light intermediate chain 1	42	6.20343	6.04936	6.53296	6.34314	6.28639	5.55459	6.43015	6.29545	6.46112	6.0949	6.39003	6.47402	6.14351	6.39288	5.8557	6.49236	6.28222	0.987458	0.962933	1.03991	1.0097	1.00066	0.884176	1.02355	1.00211	1.02848	0.970182	1.01716	1.03053	0.97792	1.01761	0.932106	1.03345	-0.0182089	-0.0544925	0.0564618	0.0139221	0.000956738	-0.177595	0.0335774	0.00303447	0.0405092	-0.0436725	0.0245477	0.0433868	-0.0322119
P46060	RANGAP1	Ran GTPase-activating protein 1	42	6.12134	6.21398	6.25247	6.40789	6.32658	6.09957	6.23966	6.37376	6.17788	6.19703	6.2323	6.14622	6.14069	6.26313	6.45252	6.35497	6.24892	0.979584	0.994409	1.00057	1.02544	1.01243	0.9761	0.998518	1.01998	0.988632	0.991696	0.99734	0.983565	0.98268	1.00227	1.03258	1.01697	-0.0297594	-0.00808927	0.00081936	0.0362425	0.017819	-0.0348993	-0.00213945	0.0285378	-0.016495	-0.0120299	-0.00384219	-0.0239075	-0.0252061
Q9UNZ2-5	NSFL1C	Isoform 3 of NSFL1 cofactor p47	42	6.34575	6.50436	6.16502	6.5576	6.23267	5.8895	6.15805	6.20418	5.93388	6.28467	6.27311	6.27819	6.27861	6.13395	6.29054	6.46993	6.39318	0.992581	1.01739	0.964312	1.02572	0.974893	0.921216	0.963221	0.970437	0.928157	0.983027	0.981219	0.982013	0.982079	0.959452	0.983945	1.012	-0.0107436	0.0248728	-0.0524287	0.0366336	-0.0366839	-0.118389	-0.0540607	-0.0432937	-0.107559	-0.0246973	-0.0273534	-0.0261856	-0.0260891
P46379-3	BAG6	Isoform 3 of Large proline-rich protein BAG6	42	6.30652	6.13301	6.40914	6.25866	6.40096	6.11158	6.32658	6.10607	6.30795	6.23261	6.24023	6.4757	6.23034	6.146	6.06995	6.24473	6.27683	1.00473	0.977087	1.02108	0.997105	1.01978	0.973673	1.00793	0.972795	1.00496	0.992955	0.994169	1.03168	0.992593	0.979156	0.96704	0.994886	0.00680742	-0.0334414	0.0300941	-0.00418291	0.0282516	-0.0384913	0.0113891	-0.0397926	0.00713451	-0.0102003	-0.00843751	0.0449994	-0.0107258
P30520	ADSS2	Adenylosuccinate synthetase isozyme 2	42	6.28376	6.10381	6.34213	6.2374	6.41544	5.79523	6.36654	6.29831	6.28407	6.15309	6.29872	6.2955	6.54576	6.10323	6.27352	6.20347	6.24178	1.00673	0.977897	1.01608	0.999299	1.02782	0.928459	1.01999	1.00906	1.00678	0.985792	1.00912	1.00861	1.0487	0.977804	1.00509	0.993863	0.00967173	-0.0322463	0.0230111	-0.00101157	0.0395919	-0.10709	0.0285532	0.0130084	0.0097429	-0.0206453	0.0131023	0.0123646	0.0686044
Q9BQ52	ELAC2	Zinc phosphodiesterase ELAC protein 2	42	6.25602	6.13631	6.22178	6.27553	6.22702	6.26262	6.23239	6.48541	6.37046	6.23698	6.1058	6.27234	6.25056	6.17316	6.20784	6.28578	6.22241	1.0054	0.986163	0.999899	1.00854	1.00074	1.00646	1.0016	1.04227	1.02379	1.00234	0.98126	1.00802	1.00452	0.992085	0.997658	1.01018	0.00777167	-0.0201021	-0.000146076	0.0122638	0.00106845	0.00929288	0.00231206	0.0597243	0.0339241	0.00337417	-0.0272931	0.0115303	0.00651199
O43592	XPOT	Exportin-T	42	6.46397	6.15795	6.51328	6.27092	6.51785	5.66343	6.3047	6.34537	6.51906	6.1364	6.25631	6.33322	6.33557	6.0537	5.84746	6.28082	6.35153	1.0177	0.969522	1.02547	0.987309	1.02619	0.891664	0.992627	0.99903	1.02638	0.966129	0.985008	0.997117	0.997487	0.953109	0.920638	0.988867	0.0253163	-0.044654	0.0362801	-0.018427	0.037292	-0.165428	-0.0106764	-0.00139987	0.0375598	-0.0497116	-0.0217922	-0.00416496	-0.00362974
P28331-2	NDUFS1	Isoform 2 of NADH-ubiquinone oxidoreductase 75 kDa subunit, mitochondrial	42	6.41198	6.33699	6.13348	6.45772	6.31373	6.23146	6.05519	6.30136	6.10394	6.22326	6.25399	6.27926	6.36105	5.86821	6.37529	6.29309	6.33504	1.01214	1.00031	0.968183	1.01936	0.996636	0.983649	0.955825	0.994683	0.96352	0.982355	0.987206	0.991195	1.00411	0.926309	1.00635	0.993378	0.0174156	0.000443441	-0.0466484	0.0276706	-0.00486173	-0.0237841	-0.0651821	-0.00769106	-0.0536135	-0.0256838	-0.0185774	-0.0127597	0.00591063
Q9NY33	DPP3	Dipeptidyl peptidase 3	42	6.13248	6.25379	5.87442	6.17717	6.18973	7.67615	5.82413	6.2446	5.85779	6.78046	6.07064	5.898	6.14447	6.01291	6.79857	6.06469	6.10947	1.00377	1.02362	0.961528	1.01108	1.01314	1.25644	0.953296	1.02212	0.958806	1.10983	0.993645	0.965387	1.00573	0.984196	1.11279	0.992671	0.00542457	0.0336847	-0.0565996	0.0159	0.0188304	0.329337	-0.0690035	0.0315631	-0.0606896	0.150337	-0.00919743	-0.0508202	0.00824252
Q96KP4	CNDP2	Cytosolic non-specific dipeptidase	42	6.04187	6.61713	6.36007	5.4064	6.29858	5.44962	6.8666	6.20959	7.26355	6.39328	6.16698	6.56175	5.94042	6.9631	5.5477	5.91334	6.10637	0.989438	1.08364	1.04155	0.885371	1.03148	0.892449	1.1245	1.0169	1.1895	1.04699	1.00993	1.07458	0.972824	1.1403	0.908511	0.968389	-0.0153193	0.115891	0.0587282	-0.175646	0.0447122	-0.164159	0.169282	0.0241836	0.25036	0.0662419	0.0142497	0.103766	-0.0397495
B5ME19	EIF3CL	Eukaryotic translation initiation factor 3 subunit C-like protein	42	6.41543	6.08564	6.47277	6.27181	6.30255	5.79361	6.36085	6.31668	6.40384	6.06594	6.12774	6.27669	6.37674	6.2093	6.12361	6.39682	6.31141	1.01648	0.964228	1.02557	0.993725	0.998596	0.917958	1.00783	1.00083	1.01464	0.961107	0.970898	0.994498	1.01035	0.983821	0.970244	1.01353	0.023583	-0.0525539	0.0364203	-0.00908106	-0.00202726	-0.1235	0.0112566	0.00120357	0.0209743	-0.0572317	-0.0426078	-0.00795896	0.0148561
O14974	PPP1R12A	Protein phosphatase 1 regulatory subunit 12A	42	6.40949	6.39927	6.33158	6.45141	6.30654	5.89464	6.31793	6.33524	6.03248	6.24368	6.28108	6.13483	5.94228	6.1207	6.33873	6.46013	6.39794	1.00181	1.00021	0.989628	1.00836	0.985715	0.921334	0.987495	0.9902	0.942879	0.975889	0.981735	0.958876	0.928781	0.956668	0.990746	1.00972	0.00260267	0.000300439	-0.0150413	0.0120076	-0.0207582	-0.118203	-0.0181549	-0.0142076	-0.0848557	-0.0352103	-0.0265943	-0.0605835	-0.10659
P63208	SKP1	S-phase kinase-associated protein 1	42	6.33312	6.22931	6.1621	6.13057	6.31321	6.01042	6.46402	6.30718	6.57766	6.20377	6.28251	6.33816	5.73823	6.55743	6.29252	6.0598	6.21377	1.01921	1.0025	0.991684	0.98661	1.016	0.967274	1.04027	1.01503	1.05856	0.99839	1.01106	1.02002	0.923469	1.05531	1.01267	0.97522	0.0274464	0.00360237	-0.0120479	-0.0194488	0.0229037	-0.0480042	0.0569617	0.0215251	0.0821044	-0.0023248	0.0158711	0.0285941	-0.114864
Q09028	RBBP4	Histone-binding protein RBBP4	42	6.35319	6.26603	6.26904	6.26825	6.13927	6.14475	6.36604	6.20914	6.15335	6.22776	6.09213	6.04384	6.53359	6.11101	6.25101	6.57159	6.28913	1.01019	0.996327	0.996806	0.99668	0.976172	0.977043	1.01223	0.987282	0.978411	0.990242	0.968676	0.960998	1.03887	0.971679	0.993939	1.04491	0.0146213	-0.00530821	-0.00461535	-0.00479716	-0.0347928	-0.0335056	0.0175363	-0.0184664	-0.0314878	-0.0141465	-0.0459132	-0.0573944	0.055016
Q96RS6	NUDCD1	NudC domain-containing protein 1	42	6.31719	6.16614	6.45956	6.27406	6.3153	5.87727	6.26138	6.20355	6.38056	5.99222	6.39262	6.37164	6.80727	6.08646	5.95497	6.13979	6.30424	1.00205	0.978094	1.02464	0.995213	1.00175	0.932273	0.993202	0.984029	1.01211	0.950507	1.01402	1.01069	1.07979	0.965455	0.944598	0.973915	0.00296108	-0.0319542	0.035114	-0.00692256	0.00252938	-0.101176	-0.00984123	-0.0232278	0.0173612	-0.0732313	0.0200855	0.0153429	0.110754
P25398	RPS12	40S ribosomal protein S12	42	6.49962	6.7144	5.87467	6.16964	6.40778	6.04093	6.14924	6.42515	6.0567	6.20039	6.24976	6.27189	5.80364	6.2914	6.32737	6.51741	6.31458	1.0293	1.06332	0.930334	0.977046	1.01476	0.956663	0.973816	1.01751	0.959161	0.981916	0.989734	0.993239	0.919085	0.996329	1.00203	1.03212	0.041668	0.0885711	-0.10418	-0.033501	0.0211373	-0.0639167	-0.0382792	0.0250428	-0.0601554	-0.0263284	-0.0148866	-0.00978709	-0.121729
P0CL80	GAGE12F	G antigen 12F	42	6.29648	6.29537	6.20041	6.29236	6.02144	6.21134	6.78096	6.02718	6.78645	6.35223	6.21269	6.72779	5.80017	5.87361	5.73566	6.38586	6.27116	1.00404	1.00386	0.988719	1.00338	0.96018	0.990462	1.08129	0.961096	1.08217	1.01293	0.990677	1.07282	0.924897	0.936607	0.91461	1.01829	0.00581435	0.00555999	-0.0163676	0.00487003	-0.0586226	-0.0138266	0.112758	-0.057248	0.113926	0.018532	-0.0135131	0.101401	-0.112636
P07741	APRT	Adenine phosphoribosyltransferase	41	6.31917	6.15416	6.18206	5.86814	6.42237	5.98889	6.42981	6.31211	6.591	6.35382	6.12505	6.30281	6.54548	6.43189	5.87822	6.09503	6.13088	1.03071	1.0038	1.00835	0.957144	1.04754	0.97684	1.04876	1.02956	1.07505	1.03636	0.999049	1.02804	1.06762	1.0491	0.958789	0.994152	0.0436403	0.0054672	0.0119929	-0.0631915	0.067011	-0.0338061	0.0686814	0.0420276	0.104403	0.0515295	-0.00137313	0.0399004	0.0944042
Q9BV44	THUMPD3	THUMP domain-containing protein 3	41	6.01392	6.13179	6.13089	5.77507	6.17824	7.73717	6.24452	6.05032	6.16571	6.593	6.23785	5.9618	5.99737	6.30078	6.6212	5.86039	6.01292	1.00017	1.01977	1.01962	0.960444	1.02749	1.28676	1.03852	1.00622	1.02541	1.09647	1.03741	0.991499	0.997414	1.04787	1.10116	0.974633	0.000240512	0.0282431	0.0280314	-0.0582267	0.0391308	0.363741	0.0545255	0.00894628	0.0362019	0.13287	0.0529837	-0.0123172	-0.00373518
Q9NZL4	HSPBP1	Hsp70-binding protein 1	41	6.24525	6.26816	6.11146	5.93178	6.52871	6.02202	6.19697	6.37346	6.64452	6.13776	6.18363	6.53214	6.56365	6.16885	6.02801	6.06362	6.13916	1.01728	1.02101	0.995488	0.96622	1.06345	0.980919	1.00942	1.03816	1.08232	0.999772	1.00724	1.06401	1.06914	1.00484	0.981895	0.987695	0.0247175	0.0300001	-0.00652478	-0.0495768	0.0887561	-0.0277944	0.0135211	0.0540349	0.114123	-0.000329623	0.0104121	0.0895139	0.0964565
O00154-7	ACOT7	Isoform 7 of Cytosolic acyl coenzyme A thioester hydrolase	41	6.28749	6.19589	6.17511	6.07515	6.26901	6.3016	6.32681	6.27478	6.45204	6.4344	6.31363	6.28161	6.33686	6.18771	6.09437	5.99354	6.18341	1.01683	1.00202	0.998658	0.982492	1.01384	1.01911	1.02319	1.01478	1.04344	1.04059	1.02106	1.01588	1.02482	1.0007	0.9856	0.969294	0.0240815	0.00290886	-0.00193783	-0.0254826	0.019835	0.0273155	0.0330756	0.0211622	0.0613527	0.057403	0.030067	0.0227317	0.0353655
P08758	ANXA5	Annexin A5	41	6.29859	6.2465	6.09501	6.55533	6.2877	6.0984	5.9315	6.30946	6.28642	6.18636	6.21535	6.24717	6.19358	6.13459	6.52306	6.39096	6.29886	0.999958	0.991688	0.967637	1.04072	0.998229	0.968176	0.941679	1.00168	0.998025	0.98214	0.986742	0.991794	0.983286	0.973921	1.03559	1.01462	-6.12697e-05	-0.0120421	-0.0474616	0.0575782	-0.00255779	-0.0466594	-0.0866932	0.00242636	-0.00285151	-0.0259994	-0.0192545	-0.0118874	-0.0243166
Q9Y3F4-2	STRAP	Isoform 2 of Serine-threonine kinase receptor-associated protein	41	6.12683	6.13089	6.22376	6.42863	6.28804	6.3017	6.24984	6.26023	6.18538	6.15606	6.36454	6.11141	6.31014	6.17843	6.21367	6.47047	6.22753	0.98383	0.984482	0.999395	1.03229	1.00972	1.01191	1.00358	1.00525	0.993232	0.988524	1.022	0.981354	1.01327	0.992116	0.997775	1.03901	-0.0235187	-0.022563	-0.000873059	0.0458518	0.0139509	0.0170816	0.00515977	0.00755618	-0.00979726	-0.0166522	0.0313968	-0.0271542	0.0190125
P61970	NUTF2	Nuclear transport factor 2	41	5.67669	6.0434	6.35154	6.24964	6.63087	6.23385	6.1404	6.48691	6.7135	6.1335	6.05971	6.28884	6.25107	6.17458	6.22748	6.33804	6.08032	0.933617	0.993928	1.04461	1.02785	1.09055	1.02525	1.00988	1.06687	1.10414	1.00875	0.996611	1.03429	1.02808	1.0155	1.0242	1.04239	-0.0990967	-0.00878623	0.0629598	0.0396264	0.125052	0.0359768	0.014186	0.0933848	0.142918	0.0125639	-0.00489791	0.0486473	0.0399565
Q9NSE4	IARS2	Isoleucine--tRNA ligase, mitochondrial	41	6.31143	6.16555	6.3281	6.05232	6.36444	6.24334	6.3058	6.23722	6.3861	6.31542	6.14103	6.24293	6.4472	6.21976	6.13884	6.10051	6.21435	1.01562	0.992147	1.0183	0.973926	1.02415	1.00467	1.01472	1.00368	1.02764	1.01626	0.988202	1.0046	1.03747	1.00087	0.987849	0.981681	0.0223634	-0.0113739	0.0261689	-0.0381152	0.0344301	0.00671454	0.0210759	0.00529965	0.0393316	0.0232752	-0.0171228	0.00661979	0.0530692
Q9UBB4	ATXN10	Ataxin-10	41	6.09769	6.16128	6.29682	6.20515	6.35071	6.32476	6.22685	6.28516	6.26065	6.22904	6.40195	6.21427	6.26835	6.22093	6.33029	6.1261	6.19024	0.98505	0.995322	1.01722	1.00241	1.02592	1.02173	1.00591	1.01533	1.01138	1.00627	1.0342	1.00388	1.01262	1.00496	1.02263	0.989639	-0.0217314	-0.00676408	0.0246292	0.00347191	0.0369237	0.0310166	0.00850835	0.0219553	0.0163183	0.00901566	0.0485172	0.00559075	0.0180916
O75746	SLC25A12	Calcium-binding mitochondrial carrier protein Aralar1	41	6.02621	6.02887	6.25816	6.06273	6.2063	7.11006	6.26472	6.23597	6.13329	6.55918	6.28743	6.19609	6.07527	6.26833	6.1816	6.10579	6.09399	0.988877	0.989314	1.02694	0.99487	1.01843	1.16673	1.02802	1.0233	1.00645	1.07634	1.03174	1.01675	0.996928	1.02861	1.01438	1.00194	-0.0161368	-0.0155001	0.0383508	-0.00742015	0.0263457	0.222474	0.0398623	0.0332263	0.00927344	0.106128	0.0450827	0.0239704	-0.0044392
Q9Y2L1	DIS3	Exosome complex exonuclease RRP44	41	6.35962	6.17656	6.31473	6.38806	6.36677	6.05427	6.02913	6.21236	6.1221	6.20069	6.26942	6.16383	6.59291	6.0701	6.27565	6.40381	6.30974	1.0079	0.978893	1.00079	1.01241	1.00904	0.959511	0.955527	0.984566	0.970261	0.982717	0.993609	0.976875	1.04488	0.96202	0.994597	1.01491	0.0113594	-0.0307776	0.00113992	0.0177967	0.0129805	-0.0596281	-0.0656313	-0.0224397	-0.0435545	-0.0251524	-0.00924915	-0.0337541	0.0633343
Q9NZ08-2	ERAP1	Isoform 2 of Endoplasmic reticulum aminopeptidase 1	41	6.3255	6.19188	6.29101	6.24866	6.30382	6.36059	6.23542	6.26791	6.1711	6.23242	6.21604	6.27118	6.34077	6.21874	6.04623	6.27872	6.26426	1.00978	0.988445	1.00427	0.997509	1.00631	1.01538	0.995396	1.00058	0.985128	0.994917	0.992302	1.0011	1.01221	0.992733	0.965194	1.00231	0.0140349	-0.0167672	0.00614699	-0.00359783	0.00908167	0.0220159	-0.00665793	0.000839795	-0.021617	-0.00735221	-0.0111489	0.00159226	0.0175134
Q5JPE7	NOMO2	Nodal modulator 2	41	6.25451	6.09158	6.55872	6.07967	6.24445	6.00173	6.4568	6.29622	6.55088	6.22253	6.30613	6.23976	6.75096	6.0358	5.80848	6.10178	6.24612	1.00134	0.975258	1.05005	0.973351	0.999733	0.960873	1.03373	1.00802	1.04879	0.996223	1.00961	0.998982	1.08082	0.966328	0.929934	0.976891	0.00193658	-0.0361438	0.070454	-0.0389673	-0.000385779	-0.0575819	0.0478591	0.0115257	0.0687284	-0.00545901	0.0137946	-0.00146975	0.112132
P62847-4	RPS24	Isoform 4 of 40S ribosomal protein S24	41	6.10777	6.07535	6.51423	6.29794	6.14196	6.3383	6.30051	6.14093	6.37925	6.37572	6.38213	6.26632	6.08212	6.38075	6.17114	6.04559	6.24882	0.977427	0.972239	1.04247	1.00786	0.982899	1.01432	1.00827	0.982734	1.02087	1.02031	1.02133	1.0028	0.973323	1.02111	0.987568	0.967477	-0.0329386	-0.0406168	0.0600103	0.0112957	-0.0248852	0.0205116	0.0118843	-0.0251272	0.0298025	0.0290039	0.0304536	0.00403408	-0.0390101
Q92841	DDX17	Probable ATP-dependent RNA helicase DDX17	41	6.22278	6.25942	6.21226	6.53066	6.18679	5.99026	6.20282	6.39858	6.1064	6.11602	6.24333	6.31102	6.08344	6.0795	6.50125	6.55548	6.30628	0.986759	0.992569	0.985091	1.03558	0.981052	0.949888	0.983594	1.01464	0.968305	0.96983	0.990018	1.00075	0.964664	0.964039	1.03092	1.03952	-0.01923	-0.0107602	-0.021671	0.0504396	-0.0275982	-0.0741706	-0.023865	0.0209625	-0.0464671	-0.0441961	-0.0144735	0.00108397	-0.0519019
P52732	KIF11	Kinesin-like protein KIF11	41	6.28974	6.18057	6.52829	6.28369	6.08661	5.29665	6.55882	6.35114	6.5859	6.16279	6.36125	6.46025	6.16518	6.27884	5.96072	6.44958	6.32057	0.995122	0.97785	1.03286	0.994165	0.962984	0.838002	1.03769	1.00484	1.04198	0.975037	1.00644	1.0221	0.975415	0.993397	0.943066	1.02041	-0.00705486	-0.0323153	0.0466499	-0.00844323	-0.0544163	-0.254975	0.053381	0.00696033	0.0593254	-0.0364716	0.00925505	0.0315348	-0.0359122
P23921	RRM1	Ribonucleoside-diphosphate reductase large subunit	41	6.32504	6.13145	6.258	6.09516	6.40009	6.0317	6.08918	6.19597	6.67911	6.17315	6.08351	6.23466	7.07511	6.27081	5.8498	6.10727	6.20241	1.01977	0.988559	1.00896	0.982708	1.03187	0.972476	0.981744	0.998961	1.07686	0.995282	0.98083	1.0052	1.1407	1.01103	0.943149	0.98466	0.0282451	-0.0166012	0.0128722	-0.0251654	0.0452627	-0.0402648	-0.0265815	-0.00149932	0.106826	-0.00682263	-0.0279255	0.00748141	0.189923
P21399	ACO1	Cytoplasmic aconitate hydratase	41	6.12137	6.16805	6.05068	6.12632	6.33144	7.22946	6.04254	6.21582	6.109	6.31522	6.31611	5.99277	6.1892	6.19762	6.54578	6.04859	6.1166	1.00078	1.00841	0.989222	1.00159	1.03512	1.18194	0.987891	1.01622	0.998757	1.03247	1.03262	0.979754	1.01187	1.01325	1.07017	0.98888	0.00112346	0.0120833	-0.0156338	0.00228961	0.0498025	0.241157	-0.017576	0.0232136	-0.00179487	0.0461019	0.0463052	-0.0295081	0.0170218
O95218-2	ZRANB2	Isoform 2 of Zinc finger Ran-binding domain-containing protein 2	41	6.16128	6.23737	6.25551	6.09205	6.33603	6.03094	6.49518	6.21271	6.41135	6.3591	6.37227	6.3075	5.70226	6.49771	6.31389	6.21483	6.18655	0.995915	1.00821	1.01115	0.984725	1.02416	0.974847	1.04989	1.00423	1.03634	1.02789	1.03002	1.01955	0.921719	1.0503	1.02058	1.00457	-0.00590558	0.0118022	0.0159918	-0.0222079	0.0344435	-0.0367528	0.0702338	0.00608703	0.0514925	0.0396869	0.0426717	0.0279326	-0.117602
Q93034	CUL5	Cullin-5	41	6.37685	6.26376	6.25176	6.22187	6.28181	5.94673	6.3032	6.26377	6.12648	6.19064	6.33334	6.15137	6.34282	6.23136	6.2983	6.41593	6.27856	1.01565	0.997643	0.995732	0.990971	1.00052	0.947149	1.00392	0.997644	0.975778	0.985997	1.00872	0.979742	1.01023	0.992482	1.00314	1.02188	0.0224102	-0.00340478	-0.00617132	-0.0130855	0.000746596	-0.0783371	0.00565073	-0.00340247	-0.0353753	-0.0203451	0.0125328	-0.029526	0.0146907
Q99729-3	HNRNPAB	Isoform 3 of Heterogeneous nuclear ribonucleoprotein A/B	41	6.03128	6.00884	6.0508	6.21862	6.12525	7.49335	6.05684	6.0342	6.09687	6.42785	6.19109	6.01371	6.26059	6.22657	6.69454	6.06962	6.07738	0.992414	0.988721	0.995626	1.02324	1.00788	1.23299	0.996619	0.992894	1.00321	1.05767	1.01871	0.989523	1.03015	1.02455	1.10155	0.998722	-0.0109865	-0.0163642	-0.00632479	0.0331438	0.011318	0.30216	-0.00488539	-0.0102882	0.0046181	0.0808856	0.0267427	-0.0151954	0.0428479
Q9Y3A5	SBDS	Ribosome maturation protein SBDS	41	6.34272	6.23614	6.43899	5.85922	6.3432	6.0016	6.48932	6.29831	6.55756	6.25221	6.1917	6.17828	6.24845	6.3942	5.96669	6.20138	6.21927	1.01985	1.00271	1.03533	0.942108	1.01993	0.965001	1.04342	1.01271	1.05439	1.0053	0.995567	0.99341	1.00469	1.02813	0.959388	0.997124	0.028357	0.00390865	0.0500897	-0.0860361	0.0284662	-0.0513975	0.0613226	0.0182201	0.0764144	0.00762157	-0.0064091	-0.00953942	0.00675369
P29218-3	IMPA1	Isoform 3 of Inositol monophosphatase 1	41	6.56139	6.4405	6.27308	6.32877	6.38971	5.61818	6.19318	6.21211	5.98847	6.00801	6.44959	6.34281	6.21887	5.93716	6.34133	6.69683	6.40093	1.02507	1.00618	0.980026	0.988726	0.998246	0.877712	0.967543	0.9705	0.935562	0.938614	1.0076	0.990919	0.971556	0.927546	0.990688	1.04623	0.0357188	0.00889004	-0.0291087	-0.0163575	-0.0025322	-0.18818	-0.0476023	-0.0431993	-0.0960952	-0.0913954	0.0109248	-0.0131605	-0.0416302
Q9HC38-2	GLOD4	Isoform 2 of Glyoxalase domain-containing protein 4	41	6.26858	6.31637	5.99207	6.85203	6.09289	6.52864	6.15084	6.34108	5.81576	5.98134	6.21444	5.97163	6.13776	6.14172	6.67408	6.52079	6.35726	0.98605	0.993568	0.942555	1.07783	0.958414	1.02696	0.96753	0.997454	0.914821	0.940867	0.977534	0.93934	0.965472	0.966095	1.04984	1.02572	-0.020267	-0.00930998	-0.0853512	0.108126	-0.061279	0.0383768	-0.0476222	-0.00367708	-0.128438	-0.0879369	-0.0327813	-0.0902809	-0.0506934
P82979	SARNP	SAP domain-containing ribonucleoprotein	41	6.33814	6.31705	6.10625	6.66302	6.09161	6.02539	6.3072	6.38919	5.76775	6.07928	6.31481	6.08257	6.03418	6.51734	6.34409	6.62215	6.35611	0.997172	0.993854	0.960689	1.04828	0.958386	0.947967	0.992304	1.0052	0.907433	0.956446	0.993502	0.956963	0.94935	1.02537	0.998108	1.04185	-0.0040857	-0.00889424	-0.0578586	0.068031	-0.0613216	-0.0770906	-0.0111455	0.00748782	-0.140137	-0.0642448	-0.0094059	-0.0634642	-0.0749875
P07437	TUBB	Tubulin beta chain	40	5.82014	5.73768	6.38141	6.21423	6.27198	6.25057	6.35137	6.22149	6.40788	6.67648	6.29192	6.31701	6.32965	6.48597	6.1931	6.04911	6.03836	0.96386	0.950204	1.05681	1.02912	1.03869	1.03514	1.05184	1.03033	1.06119	1.10568	1.04199	1.04615	1.04824	1.07413	1.02563	1.00178	-0.0531041	-0.0736905	0.0797173	0.0414177	0.054763	0.0498298	0.0729099	0.0431022	0.0856892	0.14493	0.0593424	0.0650839	0.0679678
Q15398	DLGAP5	Disks large-associated protein 5	40	6.16485	6.34884	6.32814	6.32958	6.28343	6.10017	6.29338	6.29204	6.14859	6.28583	6.30256	6.21422	6.00008	6.15689	6.44969	6.30173	6.29285	0.979659	1.0089	1.00561	1.00584	0.998503	0.969381	1.00008	0.999871	0.977075	0.998884	1.00154	0.987504	0.953475	0.978394	1.02492	1.00141	-0.0296483	0.0127789	0.00806739	0.00839565	-0.00216181	-0.0448647	0.000120929	-0.000186285	-0.0334585	-0.00161087	0.00222382	-0.0181408	-0.0687324
P33991	MCM4	DNA replication licensing factor MCM4	40	6.28986	6.0951	6.43948	6.28693	6.32265	6.11512	6.22441	6.23583	6.40267	6.32278	6.24641	6.2299	6.14337	6.21775	6.17906	6.24869	6.27784	1.00191	0.970891	1.02575	1.00145	1.00714	0.97408	0.991489	0.993308	1.01988	1.00716	0.994993	0.992363	0.97858	0.990428	0.984265	0.995356	0.00275907	-0.0426189	0.0366754	0.00208687	0.0102605	-0.037888	-0.0123317	-0.00968724	0.0284048	0.0102902	-0.00724157	-0.0110598	-0.0312386
A0MZ66	SHTN1	Shootin-1	40	6.08411	6.21065	6.27745	6.60162	6.12328	6.13318	6.41177	6.43716	6.18929	6.10694	6.11867	6.03649	6.00167	6.37058	6.54245	6.35468	6.29346	0.966736	0.986842	0.997456	1.04897	0.97296	0.974533	1.0188	1.02283	0.983448	0.970363	0.972227	0.959169	0.953636	1.01225	1.03956	1.00973	-0.0488066	-0.0191086	-0.00367419	0.0689673	-0.0395482	-0.0372175	0.0268699	0.0325715	-0.0240789	-0.0434032	-0.0406347	-0.0601429	-0.0684888
Q9NRN7	AASDHPPT	L-aminoadipate-semialdehyde dehydrogenase-phosphopantetheinyl transferase	40	6.45207	6.26592	6.46795	6.18061	6.20718	5.87351	6.40874	6.21305	6.42571	6.18301	6.31689	6.43157	6.3285	6.06825	5.90015	6.27689	6.34164	1.01741	0.98806	1.01992	0.974608	0.978798	0.926182	1.01058	0.979723	1.01326	0.974986	0.996098	1.01418	0.997928	0.95689	0.930383	0.98979	0.0249067	-0.0173291	0.0284531	-0.0371062	-0.0309174	-0.110632	0.0151853	-0.0295537	0.0190005	-0.0365461	-0.00564096	0.0203155	-0.00299182
Q9NXG2	THUMPD1	THUMP domain-containing protein 1	40	6.32837	6.29234	6.23797	6.19291	6.29225	6.0491	6.37631	6.42512	6.17102	6.24553	6.16664	6.1617	6.11985	6.33678	6.06369	6.54042	6.2629	1.01045	1.0047	0.99602	0.988825	1.00469	0.965863	1.01811	1.0259	0.98533	0.997227	0.984631	0.983842	0.97716	1.0118	0.968192	1.04431	0.0150037	0.00676636	-0.00575365	-0.0162128	0.00674572	-0.0501098	0.0258915	0.0368931	-0.0213213	-0.00400626	-0.0223456	-0.0235018	-0.033334
Q92541	RTF1	RNA polymerase-associated protein RTF1 homolog	40	6.12839	6.15238	6.30165	6.57423	6.39912	6.04082	6.31139	6.35378	6.06792	6.15723	6.31205	6.16706	6.19174	6.20678	6.28749	6.34799	6.28916	0.974437	0.978251	1.00199	1.04533	1.01748	0.960513	1.00353	1.01027	0.964822	0.979022	1.00364	0.980585	0.984509	0.986901	0.999734	1.00935	-0.0373598	-0.0317233	0.00286172	0.063954	0.0250056	-0.0581235	0.00508986	0.0147472	-0.0516658	-0.0305865	0.00524072	-0.028285	-0.022523
Q07866-9	KLC1	Isoform I of Kinesin light chain 1	40	6.29938	6.36901	6.37202	6.27046	6.265	5.97084	6.37046	6.29026	6.25354	6.32734	6.17275	6.33944	5.83406	6.28899	6.17307	6.40337	6.32772	0.995522	1.00653	1.007	0.990951	0.990088	0.943601	1.00675	0.99408	0.988277	0.99994	0.97551	1.00185	0.921985	0.99388	0.97556	1.01196	-0.00647535	0.00938394	0.0100656	-0.0131139	-0.0143707	-0.0837513	0.00971236	-0.00856554	-0.0170121	-8.60711e-05	-0.0357718	0.00267021	-0.117185
Q9Y2Z0	SUGT1	Protein SGT1 homolog	40	6.29708	6.20005	6.27803	6.455	6.39652	6.0608	6.2208	6.31011	6.09653	6.07304	6.32467	6.12806	6.20687	6.24584	6.34642	6.36018	6.30754	0.998342	0.982958	0.995321	1.02338	1.01411	0.960882	0.986248	1.00041	0.966546	0.962822	1.00272	0.971545	0.98404	0.990218	1.00616	1.00835	-0.00239445	-0.0247976	-0.00676553	0.0333396	0.0202098	-0.0575692	-0.0199773	0.000587705	-0.0490891	-0.0546586	0.00391276	-0.041647	-0.0232115
P21980	TGM2	Protein-glutamine gamma-glutamyltransferase 2	40	6.3014	6.28256	6.25764	6.36844	6.29023	6.01662	6.28971	6.26732	6.34193	6.26209	6.22123	6.3751	6.00059	6.29992	6.09952	6.32569	6.30251	0.999824	0.996835	0.992881	1.01046	0.998052	0.954639	0.997969	0.994417	1.00625	0.993587	0.987104	1.01152	0.952095	0.999589	0.967792	1.00368	-0.00025411	-0.00457396	-0.0103078	0.0150135	-0.00281373	-0.0669733	-0.002933	-0.00807785	0.00899545	-0.00928226	-0.0187267	0.0165215	-0.0708221
Q9UMS4	PRPF19	Pre-mRNA-processing factor 19	40	6.42796	6.20997	6.10192	6.56171	6.32117	6.07136	6.1725	6.36471	5.9048	5.96794	6.4743	6.14785	6.22874	6.03805	6.45381	6.55321	6.32539	1.01622	0.981753	0.964671	1.03736	0.999333	0.95984	0.975829	1.00622	0.933508	0.94349	1.02354	0.971932	0.98472	0.954574	1.0203	1.03602	0.0232065	-0.0265681	-0.0518912	0.0529174	-0.000962819	-0.0591347	-0.0352995	0.00894035	-0.0992662	-0.0839214	0.0335698	-0.0410725	-0.0222141
O75330-3	HMMR	Isoform 3 of Hyaluronan mediated motility receptor	40	6.06535	6.32377	5.97851	6.35428	6.22821	7.64835	6.09118	6.19216	5.71491	6.40611	6.15881	5.70599	5.74909	6.06178	7.0754	6.24611	6.18048	0.981372	1.02318	0.967322	1.02812	1.00772	1.2375	0.985552	1.00189	0.924671	1.03651	0.996494	0.923228	0.930202	0.980795	1.1448	1.01062	-0.0271274	0.0330666	-0.0479323	0.0400104	0.0110993	0.30743	-0.0209966	0.00272445	-0.112988	0.0517303	-0.00506668	-0.115241	-0.104385
A0A0C4DG89	DDX46	Probable ATP-dependent RNA helicase DDX46	40	6.27016	6.11308	6.47993	6.15792	6.31514	5.86899	6.43724	6.20102	6.60769	6.22809	6.34348	6.4483	6.06674	6.1472	6.01144	6.30358	6.25527	1.00238	0.977268	1.03591	0.984437	1.00957	0.938247	1.02909	0.991327	1.05634	0.995654	1.0141	1.03086	0.96986	0.982723	0.96102	1.00772	0.00342952	-0.0331733	0.0509055	-0.0226296	0.013742	-0.0919605	0.0413695	-0.0125672	0.0790733	-0.00628294	0.0202018	0.0438461	-0.0441513
P50213	IDH3A	Isocitrate dehydrogenase [NAD] subunit alpha, mitochondrial	40	6.36229	6.35437	6.18805	6.36483	6.22088	6.21064	6.05554	6.21528	5.95007	6.37143	6.24049	6.19271	6.24957	6.21103	6.39662	6.41621	6.31739	1.00711	1.00585	0.979527	1.00751	0.984724	0.983103	0.958552	0.983837	0.941856	1.00855	0.987828	0.980265	0.989265	0.983165	1.01254	1.01564	0.0102186	0.0084216	-0.0298426	0.0107945	-0.0222088	-0.0245856	-0.0610719	-0.0235081	-0.0864209	0.0122897	-0.0176682	-0.0287566	-0.0155706
Q00013	MPP1	55 kDa erythrocyte membrane protein	40	6.14426	6.0589	6.35922	6.20246	6.34675	6.30477	6.24587	6.35755	6.22025	6.45564	6.25582	6.22323	6.01175	6.34446	6.39327	6.07581	6.19121	0.992417	0.978629	1.02714	1.00182	1.02512	1.01834	1.00883	1.02687	1.00469	1.04271	1.01044	1.00517	0.971014	1.02475	1.03264	0.981361	-0.0109821	-0.0311655	0.0386284	0.00261913	0.0357966	0.0262223	0.0126811	0.0382495	0.00675117	0.0603387	0.0149776	0.00744217	-0.0424364
P61758	VBP1	Prefoldin subunit 3	40	6.31017	6.3705	6.08463	6.23405	6.43029	6.35395	6.19446	6.25734	5.99209	6.12367	6.32227	6.1376	6.12746	6.31128	6.39553	6.35471	6.24984	1.00965	1.01931	0.973566	0.997474	1.02887	1.01666	0.991139	1.0012	0.958759	0.979813	1.01159	0.982042	0.980419	1.00983	1.02331	1.01678	0.0138602	0.0275879	-0.0386491	-0.00364895	0.0410651	0.0238351	-0.0128402	0.00173082	-0.0607594	-0.0294221	0.016624	-0.0261441	-0.0285295
Q7L2H7	EIF3M	Eukaryotic translation initiation factor 3 subunit M	40	6.10038	6.2014	6.35255	6.4083	6.3093	6.04189	6.17318	6.27168	6.42135	6.18805	6.21753	6.44668	6.51365	6.1606	5.98441	6.20904	6.26566	0.973622	0.989744	1.01387	1.02277	1.00697	0.964287	0.985241	1.00096	1.02485	0.987614	0.992319	1.02889	1.03958	0.983233	0.955113	0.990964	-0.0385668	-0.014872	0.0198699	0.0324758	0.010014	-0.052466	-0.0214521	0.00138604	0.0354107	-0.0179811	-0.0111243	0.0410905	0.0560003
P53004	BLVRA	Biliverdin reductase A	40	6.38381	6.21799	6.25877	6.20714	6.42843	6.03607	6.15598	6.33642	6.22692	5.982	6.22785	6.3049	6.96218	6.02253	6.10419	6.14479	6.26693	1.01865	0.992191	0.998698	0.99046	1.02577	0.963163	0.982296	1.01109	0.993616	0.954535	0.993764	1.00606	1.11094	0.961002	0.974032	0.980511	0.0266594	-0.01131	-0.00187914	-0.0138296	0.0367081	-0.0541488	-0.0257698	0.0159097	-0.00923956	-0.0671304	-0.00902411	0.00871519	0.151781
Q5JRA6	MIA3	Transport and Golgi organization protein 1 homolog	40	6.24894	6.25182	6.41517	6.42507	6.10907	6.03425	6.53467	6.15082	6.07583	6.38971	6.36149	6.17579	5.70717	6.38571	6.3863	6.34818	6.33525	0.986376	0.986831	1.01262	1.01418	0.964298	0.952488	1.03148	0.970888	0.959051	1.0086	1.00414	0.97483	0.900859	1.00796	1.00806	1.00204	-0.0197901	-0.0191253	0.0180859	0.0203106	-0.0524488	-0.0702271	0.0447128	-0.0426228	-0.06032	0.0123489	0.00596316	-0.0367779	-0.150626
P49903	SEPHS1	Selenide, water dikinase 1	40	6.27608	6.04736	6.25986	6.06824	6.47988	6.1503	6.30202	6.17736	6.47191	6.34954	6.19214	6.27296	6.58369	6.19305	6.1374	6.03821	6.16289	1.01837	0.981255	1.01574	0.984643	1.05144	0.997958	1.02258	1.00235	1.05014	1.03029	1.00475	1.01786	1.06828	1.00489	0.995865	0.97977	0.0262579	-0.0273004	0.0225245	-0.0223277	0.0723612	-0.00294909	0.0322085	0.00338454	0.0705857	0.0430462	0.00683222	0.0255405	0.0952905
Q9UI12	ATP6V1H	V-type proton ATPase subunit H	40	6.29129	6.17394	6.19761	6.24516	6.41998	6.05346	6.29238	6.31485	6.45774	6.33232	6.1523	6.26812	6.29657	6.29476	5.96409	6.24544	6.227	1.01032	0.991479	0.99528	1.00292	1.03099	0.972131	1.0105	1.01411	1.03705	1.01691	0.988004	1.0066	1.01117	1.01088	0.957779	1.00296	0.0148186	-0.0123458	-0.00682531	0.00420125	0.0440315	-0.0407773	0.0150685	0.0202112	0.0524921	0.0241969	-0.0174114	0.00949552	0.0160289
Q14980-2	NUMA1	Isoform 2 of Nuclear mitotic apparatus protein 1	39	6.12148	6.35039	6.40286	6.19785	6.20821	5.88067	6.29328	6.17747	6.30242	6.36618	6.34948	6.30488	6.1276	6.22873	6.37327	6.31522	6.26814	0.976602	1.01312	1.02149	0.988785	0.990438	0.938183	1.00401	0.985534	1.00547	1.01564	1.01298	1.00586	0.977578	0.993712	1.01677	1.00751	-0.0341581	0.0188066	0.0306779	-0.0162707	-0.0138612	-0.092058	0.00577358	-0.0210225	0.00786735	0.0223894	0.0185999	0.00843036	-0.0327164
P06737	PYGL	Glycogen phosphorylase, liver form	39	6.32471	6.19097	6.33389	6.12811	6.27643	6.07419	6.22488	6.35091	6.19118	6.26811	6.19506	6.33406	6.43641	6.19297	6.08703	6.3911	6.24442	1.01286	0.99144	1.01433	0.981374	1.00513	0.972739	0.996871	1.01705	0.991474	1.00379	0.992095	1.01436	1.03075	0.991761	0.974795	1.02349	0.0184318	-0.0124021	0.0205242	-0.0271254	0.00737662	-0.0398755	-0.00452155	0.0243957	-0.0123532	0.00546292	-0.0114493	0.020563	0.0436887
Q8TEQ6	GEMIN5	Gem-associated protein 5	39	6.34168	6.03321	6.47013	6.40493	6.23282	5.85198	6.28699	6.24879	6.59356	6.37104	6.18352	6.39059	6.33066	6.22626	5.8922	6.14165	6.31249	1.00462	0.955758	1.02497	1.01464	0.987379	0.927048	0.995961	0.989909	1.04453	1.00928	0.979569	1.01237	1.00288	0.98634	0.93342	0.972937	0.00665646	-0.0652828	0.0355861	0.0209742	-0.0183236	-0.109284	-0.00583916	-0.0146318	0.062849	0.0133203	-0.0297803	0.0177405	0.00414729
O75955	FLOT1	Flotillin-1	39	6.06322	6.12103	6.31721	6.08283	6.19277	6.10557	6.35148	6.26653	6.49441	6.31454	6.35681	6.32396	6.21934	6.39162	6.21808	6.1806	6.14607	0.986519	0.995925	1.02785	0.98971	1.0076	0.99341	1.03342	1.0196	1.05668	1.02741	1.03429	1.02894	1.01192	1.03995	1.01172	1.00562	-0.0195806	-0.00589035	0.0396227	-0.0149221	0.0109201	-0.0095388	0.047428	0.028002	0.0795337	0.0390129	0.0486382	0.0411635	0.0170967
Q14997	PSME4	Proteasome activator complex subunit 4	39	6.33116	6.05662	6.38425	6.14616	6.48437	5.57467	6.35685	6.42581	6.69318	6.13978	6.16278	6.52519	6.40657	6.26266	5.75781	6.29213	6.22955	1.01631	0.972241	1.02483	0.986614	1.04091	0.894876	1.02044	1.03151	1.07442	0.98559	0.989282	1.04746	1.02842	1.00532	0.924274	1.01005	0.0233425	-0.0406145	0.0353898	-0.019442	0.057839	-0.160241	0.0291847	0.044751	0.103564	-0.0209404	-0.0155461	0.0668925	0.0404248
P49207	RPL34	60S ribosomal protein L34	39	6.24308	6.22009	6.04593	6.16481	6.33825	6.07663	6.11548	6.38913	6.35551	6.36054	6.16123	6.18224	6.35329	6.39345	6.39572	6.20461	6.16848	1.01209	1.00837	0.980133	0.999405	1.02752	0.98511	0.991408	1.03577	1.03032	1.03114	0.998825	1.00223	1.02996	1.03647	1.03684	1.00586	0.0173435	0.012021	-0.0289502	-0.000858017	0.0391701	-0.021643	-0.0124487	0.050705	0.0430935	0.0442348	-0.00169606	0.00321521	0.0425894
Q9BQE3	TUBA1C	Tubulin alpha-1C chain	39	5.91556	5.98472	6.39246	6.0772	6.32529	5.974	6.18048	6.37446	6.74037	6.17588	6.27432	6.23781	6.81283	6.45379	6.11476	5.96606	6.09249	0.97096	0.982312	1.04924	0.997491	1.03821	0.980552	1.01444	1.04628	1.10634	1.01369	1.02985	1.02385	1.11824	1.0593	1.00366	0.979249	-0.042516	-0.025747	0.0693404	-0.00362402	0.0541008	-0.0283336	0.0206881	0.0652723	0.145797	0.0196139	0.0424283	0.0340088	0.161223
Q99439	CNN2	Calponin-2	39	6.21336	6.1482	6.48692	6.29498	6.30286	5.96674	6.39789	6.20253	6.40828	6.45829	6.09373	6.37985	6.15598	6.39112	6.04503	6.05425	6.28587	0.988465	0.978099	1.03199	1.00145	1.0027	0.949231	1.01782	0.986742	1.01947	1.02743	0.969434	1.01495	0.979337	1.01674	0.961686	0.963153	-0.0167376	-0.0319472	0.0454224	0.00209051	0.00389533	-0.0751684	0.0254849	-0.0192545	0.0278259	0.0390409	-0.0447857	0.0214112	-0.0301227
P43034	PAFAH1B1	Platelet-activating factor acetylhydrolase IB subunit alpha	39	6.44289	6.19244	6.22831	6.33259	6.3597	6.04577	6.13541	6.23566	5.99112	6.15755	6.33514	6.18204	6.40226	6.11527	6.31988	6.52397	6.29906	1.02283	0.983074	0.988769	1.00532	1.00963	0.95979	0.97402	0.989935	0.951114	0.977535	1.00573	0.981423	1.01638	0.970823	1.00331	1.03571	0.032572	-0.024628	-0.0162952	0.0076597	0.0138227	-0.0592099	-0.0379762	-0.0145937	-0.0723103	-0.0327795	0.00824052	-0.027053	0.0234453
O43768-4	ENSA	Isoform 4 of Alpha-endosulfine	39	6.16725	6.0168	6.06762	6.37067	6.19621	5.90681	6.42423	6.33696	6.42984	6.14073	6.41874	6.31583	5.72631	6.61402	6.47346	6.39452	6.15558	1.0019	0.977454	0.98571	1.03494	1.0066	0.959585	1.04364	1.02947	1.04455	0.997587	1.04275	1.02603	0.930263	1.07447	1.05164	1.03882	0.00273136	-0.0328996	-0.0207652	0.0495491	0.00949007	-0.0595168	0.0616276	0.0418949	0.0628869	-0.0034858	0.0603942	0.0370764	-0.10429
P17655	CAPN2	Calpain-2 catalytic subunit	39	6.15436	6.26073	6.14266	6.04788	6.24874	6.74926	6.25138	6.23192	6.22022	6.39527	6.35021	6.22945	6.10175	6.22062	6.22267	6.17287	6.15141	1.00048	1.01777	0.998578	0.98317	1.01582	1.09719	1.01625	1.01309	1.01119	1.03964	1.03232	1.01269	0.991927	1.01125	1.01158	1.00349	0.000692286	0.0254143	-0.00205302	-0.024487	0.0226488	0.133813	0.0232582	0.0187602	0.0160491	0.0560887	0.0458878	0.0181882	-0.0116935
P43246	MSH2	DNA mismatch repair protein Msh2	39	6.36057	6.24966	6.33826	6.39574	6.2723	6.10864	6.14972	6.2782	6.15736	6.22626	6.2355	6.21851	6.45698	6.14165	6.07872	6.33191	6.33606	1.00387	0.986364	1.00035	1.00942	0.989937	0.964107	0.970591	0.990869	0.971797	0.982671	0.984129	0.981448	1.01908	0.969317	0.959385	0.999345	0.00557063	-0.0198077	0.000501413	0.0135259	-0.0145909	-0.0527342	-0.0430647	-0.0132344	-0.0412735	-0.0252196	-0.0230802	-0.0270165	0.0272741
Q9BWD1-2	ACAT2	Isoform 2 of Acetyl-CoA acetyltransferase, cytosolic	39	6.07241	6.11669	6.29192	6.89764	6.0925	5.97517	6.27577	6.24861	6.34885	6.44961	6.1996	6.08486	6.13746	6.30513	6.52094	5.98284	6.34466	0.957089	0.964068	0.991687	1.08716	0.960256	0.941763	0.989141	0.984861	1.00066	1.01654	0.977136	0.959051	0.967342	0.993769	1.02778	0.942972	-0.0632748	-0.0527928	-0.0120437	0.120559	-0.0585096	-0.0865642	-0.0157515	-0.0220087	0.000951301	0.0236679	-0.0333689	-0.0603199	-0.0479023
O76003	GLRX3	Glutaredoxin-3	39	6.05362	6.04912	6.33753	6.22348	6.31902	6.13034	6.26365	6.2853	6.48025	6.36238	6.27234	6.24977	6.2867	6.36082	6.23778	6.08789	6.16594	0.981784	0.981054	1.02783	1.00933	1.02483	0.994227	1.01585	1.01936	1.05098	1.03186	1.01726	1.0136	1.01959	1.03161	1.01165	0.987342	-0.0265221	-0.027595	0.0396004	0.0134013	0.0353806	-0.00835318	0.0226833	0.0276613	0.0717292	0.0452463	0.0246835	0.0194828	0.0279827
Q8WU90	ZC3H15	Zinc finger CCCH domain-containing protein 15	39	6.25413	5.82086	6.26708	6.35479	6.09859	6.83079	6.40409	6.19072	6.03025	6.17225	6.32453	6.41674	5.83552	6.2025	6.20451	6.59265	6.17422	1.01294	0.942769	1.01504	1.02925	0.987751	1.10634	1.03723	1.00267	0.976683	0.999682	1.02435	1.03928	0.945144	1.00458	1.00491	1.06777	0.0185535	-0.0850234	0.0215377	0.0415887	-0.01778	0.145797	0.0527379	0.00385149	-0.0340379	-0.000459224	0.0347025	0.0555848	-0.0813945
P51665	PSMD7	26S proteasome non-ATPase regulatory subunit 7	39	5.97947	6.10441	6.28173	5.73645	6.24263	6.18361	6.57058	6.21148	6.58462	6.57363	6.31071	6.2339	6.34329	6.35604	6.25934	6.02811	6.02552	0.992358	1.01309	1.04252	0.952027	1.03603	1.02624	1.09046	1.03086	1.09279	1.09097	1.04733	1.03458	1.05274	1.05485	1.03881	1.00043	-0.0110669	0.0187673	0.0600774	-0.0709264	0.0510694	0.0373648	0.124936	0.0438525	0.128016	0.125606	0.0667178	0.0490505	0.0741467
P54709	ATP1B3	Sodium/potassium-transporting ATPase subunit beta-3	39	6.30717	6.2089	6.19193	6.02892	6.38747	6.23539	6.37002	6.24214	6.25083	6.41286	6.26632	6.13512	6.12891	6.47131	6.15432	6.20838	6.18423	1.01988	1.00399	1.00125	0.974886	1.03286	1.00827	1.03004	1.00936	1.01077	1.03697	1.01327	0.992059	0.991055	1.04642	0.995164	1.00391	0.0283988	0.00574372	0.00179519	-0.0366944	0.0466506	0.0118858	0.0427039	0.0134467	0.0154538	0.0523739	0.0190245	-0.0115024	-0.0129635
P20340-2	RAB6A	Isoform 2 of Ras-related protein Rab-6A	39	6.61548	6.42133	6.06331	6.1103	6.27745	6.29689	6.27333	6.1738	6.13957	6.16719	6.08306	6.27277	6.40287	6.19691	6.08387	6.42189	6.3026	1.04964	1.01884	0.962032	0.969488	0.996009	0.999093	0.995355	0.979563	0.974132	0.978514	0.965166	0.995266	1.01591	0.98323	0.965295	1.01893	0.0698976	0.0269239	-0.0558427	-0.044705	-0.00576962	-0.00130878	-0.00671679	-0.0297895	-0.0378106	-0.031335	-0.051151	-0.00684558	0.0227705
Q9UK76	JPT1	Jupiter microtubule associated homolog 1	39	6.34158	6.43892	5.74637	6.38961	6.08889	6.56075	6.03727	5.87517	6.46467	6.08111	6.30511	6.63705	5.96399	5.9673	6.49984	6.60237	6.22912	1.01805	1.03368	0.922501	1.02576	0.977488	1.05324	0.969201	0.943178	1.03781	0.976239	1.0122	1.06549	0.957437	0.957968	1.04346	1.05992	0.025814	0.0477904	-0.116377	0.0366995	-0.0328491	0.0748324	-0.045132	-0.0843978	0.0535484	-0.0346937	0.0174932	0.0915138	-0.0627505
O75436	VPS26A	Vacuolar protein sorting-associated protein 26A	39	6.1344	5.8742	6.48376	6.12198	6.35829	6.01377	6.45509	6.22586	6.68458	6.2057	6.26768	6.44685	6.74896	6.29961	5.66924	6.01003	6.15359	0.996882	0.954598	1.05366	0.994864	1.03327	0.977279	1.049	1.01175	1.08629	1.00847	1.01854	1.04766	1.09675	1.02373	0.921291	0.976671	-0.00450491	-0.0670348	0.0754035	-0.00742882	0.0472117	-0.0331575	0.0690101	0.016846	0.11941	0.0121668	0.0265044	0.0671673	0.133238
Q06124-1	PTPN11	Isoform 2 of Tyrosine-protein phosphatase non-receptor type 11	39	5.94776	6.08527	5.92847	7.58584	6.18202	7.46604	5.91497	6.06819	5.80906	6.24856	6.1317	5.91541	5.46019	6.05354	7.19522	6.00776	6.38684	0.931253	0.952783	0.928233	1.18773	0.967932	1.16897	0.926119	0.950109	0.909537	0.97835	0.960053	0.926188	0.854913	0.947815	1.12657	0.940647	-0.102755	-0.0697799	-0.107441	0.248208	-0.0470229	0.225242	-0.11073	-0.0738349	-0.136796	-0.0315774	-0.0588141	-0.110623	-0.22615
Q13596	SNX1	Sorting nexin-1	38	6.23057	6.21177	6.25942	6.17401	6.20168	6.22857	6.32947	6.22766	6.15832	6.4001	6.25989	6.0174	6.31755	6.2613	6.3229	6.39938	6.21894	1.00187	0.998847	1.00651	0.992775	0.997224	1.00155	1.01777	1.0014	0.990252	1.02913	1.00658	0.967592	1.01586	1.00681	1.01672	1.02901	0.00269488	-0.00166487	0.0093597	-0.0104615	-0.00401019	0.0022317	0.0254154	0.0020209	-0.0141324	0.0414252	0.00946803	-0.047529	0.0226959
O75533	SF3B1	Splicing factor 3B subunit 1	38	6.2672	6.18242	6.36706	6.23401	6.28449	6.34865	6.30608	6.29343	6.21505	6.21773	6.14405	6.19448	6.31397	6.19659	6.20533	6.22949	6.26267	1.00072	0.987186	1.01667	0.995423	1.00348	1.01373	1.00693	1.00491	0.992396	0.992824	0.981059	0.989111	1.00819	0.989448	0.990844	0.994702	0.0010426	-0.0186068	0.0238489	-0.00661797	0.00501723	0.0196714	0.00996504	0.00706808	-0.0110124	-0.0103905	-0.0275885	-0.0157953	0.011769
P05387	RPLP2	60S acidic ribosomal protein P2	38	6.11187	6.5048	6.15351	6.30321	6.16239	6.44724	6.27391	6.27295	5.90726	6.36857	6.34357	6.01182	6.0246	6.29249	6.39937	6.42243	6.26835	0.975037	1.03772	0.98168	1.00556	0.983096	1.02854	1.00089	1.00073	0.942395	1.01599	1.012	0.959076	0.961115	1.00385	1.0209	1.02458	-0.0364713	0.0534195	-0.0266756	0.00800157	-0.0245952	0.0405965	0.00127967	0.0010589	-0.085596	0.0228843	0.0172098	-0.0602833	-0.0572197
P12081	HARS	Histidine--tRNA ligase, cytoplasmic	38	6.34525	6.18502	6.38529	6.55718	6.33465	6.1081	6.30983	6.3804	5.89883	5.9401	6.41903	6.23707	5.85131	5.83264	6.5016	6.71369	6.36818	0.996399	0.971237	1.00269	1.02968	0.994734	0.959159	0.990836	1.00192	0.926297	0.932778	1.00798	0.979411	0.918835	0.915903	1.02095	1.05425	-0.00520524	-0.042104	0.0038699	0.0421933	-0.00761734	-0.0601586	-0.0132811	0.00276462	-0.110453	-0.100395	0.0114731	-0.0300138	-0.122123
P39880-3	CUX1	Isoform 3 of Homeobox protein cut-like 1	38	6.08273	6.1877	6.2132	6.38682	6.26489	6.27289	6.05618	6.16907	6.28729	6.30937	6.35846	6.33351	6.25137	6.29438	6.40332	6.12882	6.21761	0.978306	0.995189	0.99929	1.02721	1.0076	1.00889	0.974036	0.992193	1.01121	1.01476	1.02265	1.01864	1.00543	1.01235	1.02987	0.985719	-0.0316417	-0.00695745	-0.00102421	0.0387371	0.0109285	0.0127696	-0.0379526	-0.0113077	0.0160776	0.0211353	0.0323167	0.0266445	0.00781169
Q9H2U2-2	PPA2	Isoform 2 of Inorganic pyrophosphatase 2, mitochondrial	38	6.25749	6.28569	6.16481	6.27386	6.28623	6.64307	6.17041	6.12546	6.28616	6.14489	6.15144	6.167	6.55346	6.14018	6.19238	6.15747	6.24546	1.00193	1.00644	0.987086	1.00455	1.00653	1.06366	0.987983	0.980786	1.00652	0.983897	0.984945	0.987437	1.04932	0.983143	0.991501	0.985911	0.00277567	0.00926271	-0.018752	0.00654492	0.00938665	0.0890417	-0.0174421	-0.0279902	0.00937058	-0.0234212	-0.0218842	-0.0182396	0.0694484
P35611-3	ADD1	Isoform 3 of Alpha-adducin	38	6.21431	6.2441	6.15998	6.48889	6.13604	6.45106	6.02614	6.19989	5.98625	6.41585	6.2981	6.32048	6.01226	6.2129	6.32542	6.50834	6.27682	0.990041	0.994787	0.981385	1.03379	0.977571	1.02776	0.960063	0.987744	0.953707	1.02215	1.00339	1.00696	0.957851	0.989816	1.00774	1.03688	-0.0144396	-0.0075402	-0.0271082	0.0479379	-0.0327259	0.0395024	-0.0587996	-0.0177912	-0.0683813	0.0316066	0.00488283	0.0100003	-0.0621264
O00429-6	DNM1L	Isoform 6 of Dynamin-1-like protein	38	6.17183	6.22963	6.41404	6.11491	6.28471	6.2091	6.32513	6.18567	6.32551	6.37782	6.13837	6.20283	6.39202	6.32231	6.11915	6.18698	6.2326	0.990249	0.999523	1.02911	0.981117	1.00836	0.996229	1.01485	0.99247	1.01491	1.0233	0.984881	0.995223	1.02558	1.01439	0.981797	0.99268	-0.0141364	-0.000688225	0.0413986	-0.0275034	0.0120115	-0.00545054	0.0212604	-0.0109048	0.0213471	0.0332287	-0.0219791	-0.00690812	0.0364372
P51991	HNRNPA3	Heterogeneous nuclear ribonucleoprotein A3	38	5.8085	5.75001	5.74736	6.54042	6.56804	7.08395	5.72795	6.62907	6.00725	6.11365	6.41928	6.06859	6.4686	6.1507	6.70411	6.21254	5.96157	0.974323	0.964512	0.964068	1.0971	1.10173	1.18827	0.960812	1.11197	1.00766	1.02551	1.07678	1.01795	1.08505	1.03172	1.12455	1.0421	-0.0375273	-0.0521285	-0.0527935	0.13369	0.13977	0.248861	-0.057674	0.153114	0.0110118	0.036341	0.106719	0.0256684	0.117761
P37235	HPCAL1	Hippocalcin-like protein 1	38	6.7234	6.72167	5.82818	6.39617	6.20839	6.35929	5.81647	6.09447	5.7044	6.03322	6.40165	6.38032	5.94573	5.79096	6.61946	6.97623	6.41735	1.04769	1.04742	0.90819	0.996699	0.967438	0.990952	0.906366	0.949686	0.888902	0.940141	0.997553	0.994229	0.926508	0.90239	1.03149	1.08709	0.0672122	0.0668409	-0.138933	-0.00477051	-0.0477596	-0.0131131	-0.141835	-0.074478	-0.169904	-0.0890506	-0.00353499	-0.00835001	-0.110125
Q96S66	CLCC1	Chloride channel CLIC-like protein 1	38	6.52899	6.23429	6.42632	6.33782	6.24342	5.43694	6.54579	6.29962	6.23165	6.16648	6.27805	6.37957	6.37305	6.14256	5.94041	6.43503	6.38185	1.02306	0.976877	1.00697	0.9931	0.978308	0.851937	1.02569	0.987114	0.976464	0.966252	0.983734	0.999642	0.99862	0.962504	0.930828	1.00833	0.032884	-0.0337506	0.010017	-0.00998914	-0.0316393	-0.231181	0.0365915	-0.018711	-0.0343616	-0.0495286	-0.0236593	-0.000516644	-0.00199185
P05937	CALB1	Calbindin	38	6.21648	6.38538	6.03438	6.12912	6.37925	6.56826	6.13664	6.20923	6.03822	6.37704	6.30027	6.17844	5.96736	6.36437	6.44554	6.27003	6.19134	1.00406	1.03134	0.974648	0.98995	1.03035	1.06088	0.991165	1.00289	0.975269	1.02999	1.01759	0.997916	0.963824	1.02795	1.04106	1.01271	0.00584622	0.0445208	-0.0370461	-0.0145717	0.0431351	0.0852595	-0.0128027	0.00416268	-0.0361284	0.0426352	0.025162	-0.00300907	-0.0531589
P07108-5	DBI	Isoform 5 of Acyl-CoA-binding protein	38	5.90508	6.19277	6.07354	6.22253	6.34852	6.50004	6.07056	6.11933	6.348	6.28603	6.26792	6.34979	6.04881	6.47459	6.32643	6.46607	6.09848	0.968287	1.01546	0.99591	1.02034	1.041	1.06585	0.995422	1.00342	1.04092	1.03075	1.02778	1.04121	0.991855	1.06167	1.03738	1.06028	-0.0464931	0.0221352	-0.00591206	0.0290516	0.0579706	0.0919989	-0.0066201	0.004924	0.0578524	0.0436995	0.0395371	0.0582592	-0.0117984
Q99747	NAPG	Gamma-soluble NSF attachment protein	38	6.25814	6.24296	6.17555	6.40666	6.28356	6.23289	6.21617	6.17215	6.28981	6.34286	6.26776	6.17857	6.32772	6.08761	6.35075	6.16684	6.27083	0.997977	0.995556	0.984806	1.02166	1.00203	0.99395	0.991284	0.984264	1.00303	1.01149	0.999511	0.985288	1.00907	0.970783	1.01275	0.983417	-0.0029219	-0.00642561	-0.0220882	0.0309166	0.00292633	-0.00875458	-0.0126299	-0.0228827	0.0043606	0.0164777	-0.000705896	-0.0213829	0.0130299
Q9UHR4	BAIAP2L1	Brain-specific angiogenesis inhibitor 1-associated protein 2-like protein 1	38	6.16388	6.15721	6.13411	6.33881	6.30947	6.63684	6.12117	6.26253	5.79482	6.24349	6.40459	6.242	5.76513	6.20145	6.80291	6.42159	6.1985	0.994414	0.993338	0.989612	1.02264	1.0179	1.07072	0.987524	1.01033	0.934874	1.00726	1.03325	1.00702	0.930084	1.00048	1.09751	1.03599	-0.00808094	-0.00964294	-0.0150657	0.0322923	0.0255991	0.0985768	-0.0181123	0.0148259	-0.0971559	0.010433	0.0471865	0.0100886	-0.104567
Q9GZL7	WDR12	Ribosome biogenesis protein WDR12	38	6.16506	6.31984	6.11591	6.18065	6.24604	7.03594	6.12227	6.15879	6.00192	6.50605	6.19611	6.07917	6.12233	6.08518	6.60488	6.05984	6.19536	0.995108	1.02009	0.987175	0.997625	1.00818	1.13568	0.988202	0.994096	0.968776	1.05015	1.00012	0.981245	0.988211	0.982215	1.0661	0.978125	-0.00707435	0.0286988	-0.0186221	-0.00343071	0.0117525	0.183554	-0.0171226	-0.00854234	-0.0457652	0.0705926	0.000173475	-0.0273149	-0.0171085
Q96CW1	AP2M1	AP-2 complex subunit mu	38	6.46454	6.26435	6.50907	6.19219	6.40135	5.4285	6.50915	6.24795	6.46789	6.08724	6.33251	6.36496	6.34993	6.23021	5.79936	6.3508	6.35754	1.01683	0.985342	1.02384	0.973992	1.00689	0.853868	1.02385	0.982763	1.01736	0.957484	0.996063	1.00117	0.998803	0.979972	0.912202	0.99894	0.0240796	-0.0213032	0.0339834	-0.0380183	0.00990812	-0.227914	0.0340011	-0.0250852	0.0248271	-0.0626798	-0.00569062	0.00168338	-0.00172738
Q96AG4	LRRC59	Leucine-rich repeat-containing protein 59	38	6.39523	6.2894	6.03584	6.48835	6.23427	6.0218	6.21286	6.32114	5.95166	6.33039	6.26529	5.89301	6.36546	6.06394	6.77895	6.3524	6.3022	1.01476	0.997968	0.957735	1.02954	0.98922	0.955507	0.985823	1.003	0.944377	1.00447	0.994143	0.935071	1.01004	0.962193	1.07565	1.00796	0.0211396	-0.00293429	-0.0623021	0.041995	-0.015636	-0.0656619	-0.0205991	0.00432808	-0.0825646	0.0064377	-0.00847539	-0.096852	0.0144081
P50552	VASP	Vasodilator-stimulated phosphoprotein	38	6.12017	6.22806	6.09197	6.0916	6.27452	6.81694	6.31326	6.39084	6.27559	6.35804	5.99608	6.0953	6.07858	6.34765	6.36765	6.15376	6.13295	0.997916	1.01551	0.993318	0.993258	1.02308	1.11153	1.0294	1.04205	1.02326	1.0367	0.977683	0.993861	0.991135	1.03501	1.03827	1.00339	-0.00300946	0.0222017	-0.00967235	-0.00975998	0.0329239	0.152543	0.041804	0.0594244	0.0331699	0.0520009	-0.0325616	-0.00888396	-0.0128469
Q8WXX5	DNAJC9	DnaJ homolog subfamily C member 9	38	6.17113	6.19037	6.00676	6.16425	6.16732	6.84904	6.19094	6.31427	6.01067	6.50043	6.35155	5.87224	6.05458	6.49476	6.77412	5.88757	6.13313	1.0062	1.00933	0.979396	1.00507	1.00558	1.11673	1.00943	1.02954	0.980033	1.05989	1.03561	0.957463	0.987193	1.05896	1.10451	0.959962	0.00891174	0.0134027	-0.0300359	0.00730243	0.00802076	0.159279	0.0135355	0.041993	-0.0290971	0.0839122	0.0504858	-0.062712	-0.0185961
P26196	DDX6	Probable ATP-dependent RNA helicase DDX6	38	6.38931	6.1186	6.51993	6.08351	6.26791	5.88142	6.42092	6.23378	6.48412	6.14783	6.30782	6.19531	6.54806	6.19492	5.79459	6.41198	6.27784	1.01776	0.974635	1.03856	0.969045	0.998419	0.936854	1.02279	0.992982	1.03286	0.979291	1.00478	0.986854	1.04304	0.986792	0.923023	1.02137	0.0253925	-0.0370661	0.0545888	-0.0453637	-0.00228322	-0.0941032	0.0325123	-0.0101604	0.0466431	-0.0301904	0.00687381	-0.0190912	0.0607999
P61353	RPL27	60S ribosomal protein L27	38	5.89986	6.13425	5.84577	6.10561	6.20849	7.89584	5.95329	5.98844	6.07791	6.74442	6.17797	5.98968	6.11658	6.45336	6.66077	5.74775	5.99637	0.983905	1.02299	0.974884	1.01822	1.03537	1.31677	0.992815	0.998677	1.0136	1.12475	1.03028	0.998884	1.02005	1.07621	1.1108	0.958538	-0.0234093	0.032797	-0.0366969	0.0260454	0.0501524	0.397003	-0.0104028	-0.00190978	0.0194853	0.169604	0.0430429	-0.00161108	0.0286352
P62244	RPS15A	40S ribosomal protein S15a	38	6.20123	6.1011	6.32373	6.5511	6.36132	6.39567	6.17001	6.27598	6.18144	6.13023	6.29117	6.18876	6.1249	6.0798	6.39358	6.22995	6.29429	0.985215	0.969307	1.00468	1.0408	1.01065	1.01611	0.980255	0.997091	0.982071	0.973935	0.999504	0.983234	0.973088	0.965923	1.01577	0.989778	-0.0214893	-0.0449743	0.00673212	0.0576935	0.0152825	0.0230519	-0.0287708	-0.0042029	-0.0261007	-0.0381024	-0.000715303	-0.0243933	-0.0393574
Q4V321	GAGE13	G antigen 13	38	6.15635	5.91334	6.15687	6.33791	6.15275	6.2298	6.77086	5.98982	6.5768	6.27151	6.49118	6.65159	6.30786	5.88248	5.87548	6.23539	6.14112	1.00248	0.962909	1.00257	1.03205	1.00189	1.01444	1.10255	0.975363	1.07095	1.02123	1.057	1.08312	1.02715	0.957884	0.956744	1.01535	0.00357405	-0.054528	0.0036959	0.045506	0.00273017	0.0206846	0.140838	-0.0359886	0.0988846	0.0303116	0.0799796	0.115198	0.0386494
Q96C19	EFHD2	EF-hand domain-containing protein D2	37	6.34538	6.09925	6.29416	6.16657	6.40843	6.24358	6.32732	6.34165	6.21563	6.31177	6.19452	6.17643	6.29357	6.17812	6.23348	6.17015	6.22634	1.01912	0.979588	1.01089	0.9904	1.02925	1.00277	1.01622	1.01852	0.99828	1.01372	0.994889	0.991984	1.0108	0.992255	1.00115	0.990975	0.0273222	-0.0297525	0.0156295	-0.0139161	0.0415866	0.00398913	0.0232102	0.0264739	-0.00248373	0.0196603	-0.00739186	-0.0116112	0.0154943
Q9UHB9	SRP68	Signal recognition particle subunit SRP68	37	6.11115	6.16964	6.4844	6.21219	6.20227	6.1096	6.094	6.3058	6.50695	6.22284	6.26186	6.43565	6.27446	6.21796	6.21258	6.17864	6.24435	0.97867	0.988036	1.03844	0.994851	0.993262	0.978421	0.975923	1.00984	1.04205	0.996556	1.0028	1.03064	1.00482	0.995775	0.994913	0.989478	-0.0311064	-0.0173639	0.0544228	-0.00744829	-0.00975392	-0.0314723	-0.0351607	0.0141292	0.0594312	-0.0049771	0.00404101	0.0435356	0.00694105
Q08211	DHX9	ATP-dependent RNA helicase A	37	6.12256	6.05582	6.38717	6.4311	6.31872	6.15389	6.34441	6.17303	6.41956	6.17807	6.29776	6.3356	6.29853	6.13023	6.17173	6.18183	6.24916	0.979741	0.969061	1.02208	1.02911	1.01113	0.984754	1.01524	0.987817	1.02727	0.988624	1.00778	1.01383	1.0079	0.980968	0.987609	0.989225	-0.0295278	-0.0453405	0.031514	0.0414027	0.0159695	-0.0221642	0.0218232	-0.0176841	0.0388116	-0.0165066	0.0111759	0.0198184	0.0113523
Q9ULV4-3	CORO1C	Isoform 3 of Coronin-1C	37	6.15426	6.31496	6.22574	5.96213	6.22743	6.39831	6.40999	6.18784	6.45976	6.42497	6.17677	6.23093	6.20572	6.41698	6.11918	6.08503	6.16427	0.998376	1.02445	1.00997	0.967207	1.01025	1.03797	1.03986	1.00382	1.04794	1.04229	1.00203	1.01081	1.00672	1.041	0.992685	0.987145	-0.00234524	0.034843	0.0143147	-0.0481028	0.0147063	0.0537603	0.0563915	0.00550525	0.0675499	0.0597591	0.00292197	0.0155169	0.00966796
O15439	ABCC4	Multidrug resistance-associated protein 4	37	6.41236	6.25929	6.34159	6.21045	6.36456	6.25906	6.30524	6.17224	6.2411	6.14252	6.26475	6.30256	6.43098	6.06754	6.14726	6.0785	6.30592	1.01688	0.992605	1.00566	0.98486	1.0093	0.992568	0.999892	0.9788	0.98972	0.974087	0.993471	0.999467	1.01983	0.962197	0.974839	0.963935	0.024148	-0.0107084	0.00813717	-0.0220096	0.0133533	-0.0107614	-0.000156154	-0.0309133	-0.0149071	-0.0378768	-0.0094505	-0.000769492	0.0283312
Q15276	RABEP1	Rab GTPase-binding effector protein 1	37	6.21574	6.1627	6.49543	5.76829	6.2496	5.45738	6.6444	6.27085	7.00723	6.41518	6.21527	6.51755	6.2914	6.55709	5.66748	6.06441	6.16054	1.00896	1.00035	1.05436	0.936329	1.01446	0.885861	1.07854	1.01791	1.13744	1.04133	1.00888	1.05795	1.02124	1.06437	0.919965	0.984396	0.0128693	0.000505747	0.0763682	-0.0949131	0.020707	-0.174848	0.109082	0.0256042	0.185787	0.0584329	0.0127602	0.0812729	0.0303243
Q9NQC3	RTN4	Reticulon-4	37	6.52478	6.22023	6.5266	6.15362	6.34953	5.20722	6.77369	6.43878	6.62569	6.12148	6.32947	6.43944	6.49133	6.23301	5.55452	6.01061	6.35631	1.0265	0.978592	1.02679	0.968112	0.998934	0.819221	1.06566	1.01297	1.04238	0.963056	0.995778	1.01308	1.02124	0.980602	0.87386	0.945613	0.0377403	-0.031221	0.0381427	-0.0467536	-0.00153911	-0.287676	0.091753	0.0185984	0.0598818	-0.0543084	-0.00610422	0.0187463	0.0303252
Q8N1F7	NUP93	Nuclear pore complex protein Nup93	37	6.06978	6.10712	6.36645	6.23298	6.32284	6.59833	6.30714	6.24896	6.41871	6.33377	6.22765	6.31432	6.10531	6.14593	6.06212	6.1386	6.19408	0.979932	0.98596	1.02783	1.00628	1.02079	1.06526	1.01825	1.00886	1.03626	1.02255	1.00542	1.01941	0.985668	0.992226	0.978695	0.991043	-0.0292464	-0.0203984	0.0395985	0.00903148	0.0296821	0.0912103	0.0260954	0.0127255	0.0513928	0.0321739	0.00779727	0.0277368	-0.020826
Q96FW1	OTUB1	Ubiquitin thioesterase OTUB1	37	6.30773	6.05519	6.41769	6.20177	6.31709	5.95087	6.11877	6.39877	6.36703	6.2165	6.18179	6.37628	6.40315	6.16386	6.1301	6.39341	6.24559	1.00995	0.969514	1.02755	0.992983	1.01145	0.952811	0.979694	1.02453	1.01944	0.995342	0.989784	1.02092	1.02523	0.986913	0.981508	1.02367	0.0142819	-0.0446668	0.0392151	-0.010159	0.0164211	-0.0697384	-0.0295973	0.0349556	0.0277815	-0.00673647	-0.0148144	0.029876	0.0359428
O00487	PSMD14	26S proteasome non-ATPase regulatory subunit 14	37	6.21551	6.35305	6.17575	6.52428	6.36621	6.37133	5.91259	6.40429	6.00835	6.02996	6.05479	6.18197	6.73284	6.03522	6.3015	6.33235	6.31715	0.983911	1.00568	0.977617	1.03279	1.00777	1.00858	0.935959	1.01379	0.951118	0.954538	0.958469	0.978601	1.0658	0.955371	0.997523	1.00241	-0.0234005	0.00817612	-0.0326589	0.0465454	0.0111615	0.0123213	-0.095483	0.0197654	-0.0723044	-0.0671248	-0.0611963	-0.0312066	0.0919419
O95861	BPNT1	3'(2'),5'-bisphosphate nucleotidase 1	37	6.33414	6.21251	6.16465	6.00049	6.37723	6.10776	6.25924	6.26026	6.42483	6.24774	6.33703	6.25191	6.34078	6.30606	6.19599	6.17937	6.17795	1.02528	1.00559	0.997848	0.971276	1.03226	0.988639	1.01316	1.01332	1.03996	1.0113	1.02575	1.01197	1.02636	1.02074	1.00292	1.00023	0.0360211	0.00804866	-0.00310862	-0.0420473	0.0458023	-0.0164842	0.0188599	0.019095	0.0565307	0.0162068	0.0366792	0.0171694	0.0375327
Q9BT78	COPS4	COP9 signalosome complex subunit 4	37	6.28792	6.4086	6.01184	6.11555	6.30689	7.05883	5.97032	5.97315	6.11769	6.47078	6.11548	6.10262	6.53537	6.19637	6.29519	6.03338	6.20598	1.0132	1.03265	0.968718	0.985429	1.01626	1.13742	0.962027	0.962483	0.985774	1.04267	0.985418	0.983345	1.05308	0.998452	1.01438	0.972189	0.0189244	0.0463508	-0.0458519	-0.0211762	0.0232703	0.185771	-0.0558502	-0.0551665	-0.0206715	0.0602812	-0.0211927	-0.0242297	0.0746105
Q01433	AMPD2	AMP deaminase 2	37	6.21131	6.32853	6.22574	6.24869	6.35696	6.67584	5.95923	6.22345	5.91251	6.40487	6.21969	6.0448	6.14353	6.22108	6.50914	6.31463	6.25357	0.993243	1.01199	0.99555	0.99922	1.01653	1.06753	0.952933	0.995184	0.945462	1.02419	0.994583	0.966616	0.982404	0.994805	1.04087	1.00976	-0.00978187	0.017191	-0.00643412	-0.00112568	0.0236576	0.0942699	-0.0695535	-0.00696488	-0.0809087	0.0344898	-0.00783677	-0.0489848	-0.0256116
Q709C8	VPS13C	Vacuolar protein sorting-associated protein 13C	37	6.37961	6.31784	6.59699	6.35886	6.13364	5.61562	6.80279	6.33216	6.40077	6.16149	6.16716	6.42706	5.93177	6.50551	5.62819	6.24054	6.41333	0.994743	0.985111	1.02864	0.991508	0.95639	0.875618	1.06073	0.987344	0.998042	0.960733	0.961617	1.00214	0.924913	1.01437	0.877578	0.973058	-0.00760429	-0.0216411	0.0407354	-0.0123044	-0.064329	-0.191627	0.085054	-0.0183748	-0.00282705	-0.0577932	-0.0564662	0.00308642	-0.11261
O60502	OGA	Protein O-GlcNAcase	37	6.03815	6.08211	6.36516	6.34349	6.2922	6.06574	6.36859	6.31417	6.17006	6.26163	6.31037	6.22476	6.20906	6.31436	6.36197	6.27817	6.20723	0.972761	0.979843	1.02544	1.02195	1.01369	0.977206	1.026	1.01723	0.994012	1.00876	1.01662	1.00282	1.0003	1.01726	1.02493	1.01143	-0.0398424	-0.0293771	0.0362478	0.0313278	0.0196155	-0.0332654	0.037025	0.0246441	-0.0086645	0.0125892	0.0237756	0.00406919	0.00042585
O75306	NDUFS2	NADH dehydrogenase [ubiquinone] iron-sulfur protein 2, mitochondrial	37	6.32627	6.20385	6.50363	6.33345	6.2802	5.94177	6.33748	6.15326	6.33987	6.11942	6.24629	6.38371	6.33423	6.21025	6.13911	6.1472	6.3418	0.997551	0.978248	1.02552	0.998683	0.990287	0.936922	0.999319	0.97027	0.999696	0.964934	0.98494	1.00661	0.998806	0.979257	0.968039	0.969315	-0.00353725	-0.0317286	0.0363528	-0.00190079	-0.0140819	-0.0939996	-0.000983091	-0.0435414	-0.000439122	-0.0514975	-0.0218928	0.00950273	-0.00172313
Q13561	DCTN2	Dynactin subunit 2	37	6.34205	6.41725	5.92805	7.66516	6.22966	6.6659	5.75614	5.98225	5.83697	6.01222	6.1391	5.89605	5.85172	5.72999	7.15352	6.39398	6.58813	0.962648	0.974063	0.899808	1.16348	0.945589	1.0118	0.873714	0.908035	0.885983	0.912584	0.931843	0.894951	0.888222	0.869745	1.08582	0.970531	-0.0549192	-0.0379133	-0.152311	0.218447	-0.080715	0.0169312	-0.194767	-0.13918	-0.174649	-0.131971	-0.101841	-0.16012	-0.171008
P46779	RPL28	60S ribosomal protein L28	37	5.87237	6.12498	6.08083	6.08314	6.01519	7.74411	6.14021	6.12953	5.93456	6.87896	6.13599	5.95077	5.76444	6.50964	6.66816	5.96712	6.04033	0.972194	1.01401	1.0067	1.00709	0.995838	1.28207	1.01654	1.01477	0.982489	1.13884	1.01584	0.985173	0.954325	1.0777	1.10394	0.98788	-0.0406845	0.0200778	0.00964089	0.0101888	-0.00601706	0.358472	0.0236606	0.0211491	-0.0254863	0.187563	0.0226688	-0.021551	-0.0674469
Q15942	ZYX	Zyxin	37	6.58776	6.43449	6.22138	6.07322	6.34365	6.00297	6.22343	6.10222	6.19773	6.21285	6.29916	6.3055	6.00803	6.14007	6.32566	6.52188	6.32921	1.04085	1.01663	0.982963	0.959554	1.00228	0.948454	0.983287	0.964136	0.979226	0.981615	0.995252	0.996253	0.949254	0.970116	0.999439	1.03044	0.057762	0.0237998	-0.0247914	-0.0595644	0.00328717	-0.0763495	-0.0243161	-0.0526918	-0.0302861	-0.0267708	-0.00686655	-0.00541523	-0.075134
Q9UBL3	ASH2L	Set1/Ash2 histone methyltransferase complex subunit ASH2	37	6.20723	6.14771	6.5812	6.4974	6.09183	5.86896	6.70983	6.24236	6.43275	6.18075	6.15738	6.22138	6.11047	6.21296	5.92416	6.41363	6.35838	0.976227	0.966867	1.03504	1.02186	0.958078	0.923027	1.05527	0.981752	1.0117	0.972063	0.968387	0.978453	0.96101	0.977129	0.931708	1.00869	-0.0347108	-0.0486113	0.0496903	0.0312022	-0.0617847	-0.115555	0.0776158	-0.0265688	0.0167752	-0.0408785	-0.0463438	-0.0314257	-0.057377
P08708	RPS17	40S ribosomal protein S17	37	6.37961	6.21362	6.36099	6.26054	6.20488	5.66441	6.36186	6.41857	6.28702	6.21111	6.22825	6.31623	6.44266	6.3391	5.93806	6.37308	6.30369	1.01204	0.985712	1.00909	0.993155	0.984325	0.898586	1.00923	1.01822	0.997356	0.985313	0.988032	1.00199	1.02205	1.00562	0.941997	1.01101	0.0172716	-0.0207626	0.0130547	-0.00990949	-0.0227933	-0.154271	0.013252	0.0260553	-0.00382024	-0.0213455	-0.0173697	0.00286712	0.0314599
Q9BXS5-2	AP1M1	Isoform 2 of AP-1 complex subunit mu-1	37	6.12109	6.21614	6.35372	6.21959	6.39025	6.13172	6.37123	6.22075	6.1481	6.37918	6.32083	6.25677	6.15065	6.2958	6.21645	6.20773	6.22764	0.982892	0.998154	1.02025	0.998708	1.02611	0.984598	1.02306	0.998894	0.987229	1.02433	1.01496	1.00468	0.987638	1.01095	0.998204	0.996804	-0.0248958	-0.00266539	0.0289171	-0.00186491	0.037188	-0.0223926	0.0328875	-0.00159586	-0.0185438	0.0346866	0.0214296	0.00673368	-0.0179455
Q13069	GAGE5	G antigen 5	37	6.38105	6.29446	6.01175	6.30663	6.31491	5.83832	6.55692	6.09805	6.54428	6.05755	6.27671	6.61935	5.5681	6.30597	6.15078	6.67518	6.24847	1.02122	1.00736	0.962115	1.00931	1.01063	0.93436	1.04936	0.975927	1.04734	0.969445	1.00452	1.05935	0.891114	1.0092	0.984365	1.06829	0.0302903	0.0105791	-0.0557185	0.0133657	0.0152586	-0.0979503	0.0695147	-0.0351556	0.0667309	-0.0447691	0.006505	0.083186	-0.166318
Q9UBF2	COPG2	Coatomer subunit gamma-2	36	6.23172	6.08426	6.55929	6.19267	6.22853	5.70487	6.53216	6.17638	6.53593	6.23049	6.38408	6.41633	6.46529	6.191	5.89357	6.17342	6.26699	0.994373	0.970843	1.04664	0.988142	0.993864	0.910305	1.04231	0.985542	1.04291	0.994177	1.01868	1.02383	1.03164	0.987875	0.940416	0.98507	-0.00814113	-0.0426897	0.0657681	-0.01721	-0.00887983	-0.135578	0.0597886	-0.02101	0.060621	-0.00842591	0.0267072	0.0339768	0.0449435
Q93050	ATP6V0A1	V-type proton ATPase 116 kDa subunit a isoform 1	36	6.24854	6.25061	6.41428	5.94845	6.2181	5.88767	6.5542	6.15046	6.36984	6.3591	6.29053	6.23239	6.49636	6.43137	5.93965	6.20845	6.21547	1.00532	1.00565	1.03199	0.957039	1.00042	0.947261	1.0545	0.989541	1.02484	1.02311	1.01208	1.00272	1.04519	1.03474	0.955624	0.998871	0.00765565	0.0081335	0.0454238	-0.0633497	0.00061033	-0.0781667	0.0765562	-0.0151692	0.0353936	0.0329591	0.0173181	0.00392203	0.0637681
P46063	RECQL	ATP-dependent DNA helicase Q1	36	6.11757	6.16955	6.26339	6.12508	6.40626	6.01667	6.2919	6.28963	6.73229	6.14549	6.09607	6.38298	6.82384	6.28599	5.81658	6.03672	6.1689	0.99168	1.00011	1.01532	0.992897	1.03848	0.975323	1.01994	1.01957	1.09133	0.996206	0.988194	1.0347	1.10617	1.01898	0.942888	0.978574	-0.012054	0.000152589	0.021931	-0.010284	0.0544697	-0.0360474	0.0284831	0.0279625	0.126085	-0.00548463	-0.0171332	0.0492175	0.145571
P08574	CYC1	Cytochrome c1, heme protein, mitochondrial	36	6.37151	6.17843	6.20098	6.27757	6.11958	6.18102	6.13457	6.07935	6.13603	6.15703	6.26576	6.33419	6.91017	6.23965	6.15449	6.25966	6.25712	1.01828	0.987424	0.991027	1.00327	0.978018	0.987837	0.980414	0.971589	0.980647	0.984003	1.00138	1.01232	1.10437	0.997208	0.983597	1.00041	0.026136	-0.0182591	-0.0130031	0.00470686	-0.0320667	-0.0176544	-0.0285371	-0.0415823	-0.0281938	-0.0232648	0.00199016	0.0176608	0.143222
Q96I24	FUBP3	Far upstream element-binding protein 3	36	6.23211	6.2222	6.56155	6.22625	6.09438	5.72171	6.50864	6.24116	6.84695	6.09548	6.1865	6.166	6.33343	6.2527	6.0549	6.25605	6.31053	0.987574	0.986003	1.03978	0.986645	0.965748	0.906693	1.03139	0.989008	1.085	0.965922	0.980346	0.977097	1.00363	0.990836	0.959492	0.991367	-0.0180399	-0.0203358	0.056276	-0.0193971	-0.0502811	-0.141314	0.0445955	-0.0159464	0.117701	-0.0500208	-0.0286372	-0.0334257	0.00522643
P48739-3	PITPNB	Isoform 3 of Phosphatidylinositol transfer protein beta isoform	36	6.29479	6.04853	6.51598	6.2043	6.37495	5.78524	6.41427	6.23945	6.35818	6.23505	6.28956	6.40406	6.25747	6.33012	5.92144	6.32659	6.2659	1.00461	0.965309	1.03991	0.990169	1.0174	0.92329	1.02368	0.995779	1.01473	0.995077	1.00378	1.02205	0.998655	1.01025	0.945026	1.00969	0.0066365	-0.0509372	0.0564604	-0.0142533	0.0248923	-0.115145	0.0337633	-0.00610288	0.0210921	-0.00712062	0.00543735	0.0314651	-0.00194228
P13984	GTF2F2	General transcription factor IIF subunit 2	36	6.24344	6.08261	6.34976	6.10801	6.38607	5.95931	6.3277	6.2991	6.15935	6.39764	6.30739	6.23794	6.41041	6.25711	6.13528	6.33893	6.19595	1.00766	0.981707	1.02482	0.985806	1.03068	0.961807	1.02126	1.01665	0.994092	1.03255	1.01799	1.00678	1.03461	1.00987	0.990207	1.02308	0.0110145	-0.0266362	0.0353754	-0.0206242	0.0436017	-0.0561814	0.0303545	0.023819	-0.00854856	0.0462131	0.0257165	0.00974301	0.04909
P82094-2	TMF1	Isoform 2 of TATA element modulatory factor	36	6.3082	6.39431	6.34079	6.1807	6.28206	5.8826	6.33361	6.35092	6.09523	6.30186	6.1594	6.4776	6.16082	6.33711	6.01222	6.38258	6.306	1.00035	1.014	1.00552	0.98013	0.996204	0.932858	1.00438	1.00712	0.966576	0.999343	0.976752	1.02721	0.976977	1.00493	0.953413	1.01214	0.000503231	0.0200635	0.00793743	-0.0289549	-0.00548745	-0.100271	0.00630286	0.0102404	-0.0490445	-0.000947466	-0.0339353	0.0387342	-0.0336028
O75937	DNAJC8	DnaJ homolog subfamily C member 8	36	6.09776	6.52316	5.8244	6.51772	6.17222	6.97941	5.85809	6.19446	5.58627	6.15416	6.29571	5.74255	6.18162	6.14511	7.13236	6.59501	6.24076	0.977086	1.04525	0.933284	1.04438	0.989017	1.11836	0.938682	0.992581	0.895127	0.986123	1.00881	0.920168	0.990524	0.984673	1.14287	1.05676	-0.0334424	0.0638493	-0.0996123	0.0626456	-0.0159322	0.161383	-0.0912914	-0.0107432	-0.159836	-0.0201598	0.0126474	-0.12003	-0.0137368
Q9BS26	ERP44	Endoplasmic reticulum resident protein 44	36	6.19633	6.14409	6.2907	6.55935	6.41	6.24217	6.13304	6.11579	6.07249	6.29339	6.27674	6.13742	6.43003	6.20033	6.26972	6.2284	6.29762	0.983917	0.975621	0.998902	1.04156	1.01785	0.991195	0.973867	0.971128	0.964252	0.999329	0.996685	0.974562	1.02103	0.984552	0.99557	0.989009	-0.0233922	-0.0356068	-0.00158557	0.0587467	0.0255182	-0.0127585	-0.0382038	-0.0422673	-0.0525179	-0.000968786	-0.00479069	-0.0371738	0.0300193
O43765	SGTA	Small glutamine-rich tetratricopeptide repeat-containing protein alpha	36	6.37923	6.48548	6.03351	6.17271	6.30506	6.49702	6.08729	6.14565	5.98066	6.23489	6.29458	6.17919	6.09321	6.14419	6.5088	6.45853	6.26773	1.01779	1.03474	0.96263	0.984839	1.00596	1.03658	0.971211	0.980522	0.954198	0.99476	1.00428	0.985873	0.972155	0.980289	1.03846	1.03044	0.0254387	0.0492697	-0.0549461	-0.0220396	0.00856649	0.0518345	-0.0421435	-0.028378	-0.0676389	-0.0075795	0.00616651	-0.0205259	-0.0407411
P38919	EIF4A3	Eukaryotic initiation factor 4A-III	36	6.27651	6.08698	6.2433	6.05865	6.42151	5.99587	6.36782	6.22741	6.50636	6.18057	6.22472	6.35104	6.29292	6.38711	6.11483	6.2644	6.16636	1.01786	0.987127	1.01248	0.982533	1.04138	0.972352	1.03267	1.0099	1.05514	1.0023	1.00946	1.02995	1.02052	1.0358	0.991643	1.0159	0.0255435	-0.0186925	0.0178897	-0.0254228	0.0584935	-0.04045	0.0463804	0.0142131	0.0774315	0.00332078	0.0135898	0.0425737	0.0293105
Q16630-2	CPSF6	Isoform 2 of Cleavage and polyadenylation specificity factor subunit 6	36	6.20138	6.31919	6.3996	6.30109	6.23783	6.1768	6.51014	6.34029	6.29667	6.41443	6.35239	6.30417	5.94494	6.37406	5.85816	5.96886	6.30532	0.983516	1.0022	1.01495	0.99933	0.989297	0.979618	1.03248	1.00555	0.998629	1.01731	1.00747	0.999818	0.942846	1.0109	0.929083	0.946639	-0.0239792	0.0031712	0.0214133	-0.00096703	-0.0155242	-0.0297088	0.0461201	0.00798038	-0.00197939	0.0247526	0.010731	-0.000262007	-0.0849062
P42166	TMPO	Lamina-associated polypeptide 2, isoform alpha	36	6.23146	6.11134	6.41816	6.33738	6.22955	6.18155	6.45061	6.33007	6.03415	6.22982	6.37264	6.02719	6.11013	6.12176	6.4706	6.34357	6.27459	0.993127	0.973983	1.02288	1.01001	0.992823	0.985173	1.02805	1.00884	0.961681	0.992866	1.01563	0.960572	0.97379	0.975644	1.03124	1.01099	-0.00994982	-0.0380313	0.0326397	0.0143665	-0.0103921	-0.0215514	0.0399156	0.0127014	-0.0563695	-0.0103296	0.0223711	-0.0580345	-0.038317
O60313-2	OPA1	Isoform 2 of Dynamin-like 120 kDa protein, mitochondrial	36	6.32871	6.13444	6.36687	6.34476	6.45486	6.07077	6.19233	6.38127	6.32752	6.21282	6.36727	6.31962	6.01785	5.92872	6.37344	6.17875	6.29369	1.00556	0.974696	1.01163	1.00811	1.02561	0.96458	0.983894	1.01391	1.00537	0.98715	1.01169	1.00412	0.956171	0.942009	1.01267	0.981736	0.0080042	-0.0369756	0.016677	0.0116583	0.0364785	-0.0520277	-0.0234249	0.0199363	0.0077329	-0.018659	0.0167677	0.00593055	-0.0646591
Q8TCS8	PNPT1	Polyribonucleotide nucleotidyltransferase 1, mitochondrial	36	6.33314	6.06997	6.51242	6.14321	6.33803	5.81519	6.27475	6.23138	6.62699	6.36692	6.14419	6.33131	6.48514	6.1607	5.89583	6.27082	6.26469	1.01093	0.968919	1.03954	0.98061	1.01171	0.928249	1.00161	0.994684	1.05783	1.01632	0.980766	1.01064	1.03519	0.983401	0.941122	1.00098	0.015679	-0.0455526	0.0559518	-0.0282493	0.0167925	-0.107416	0.00231601	-0.00769027	0.0811118	0.0233537	-0.0280191	0.0152621	0.0498957
Q99873	PRMT1	Protein arginine N-methyltransferase 1	36	6.20099	5.79836	6.62102	6.23955	6.18918	5.81801	6.59717	6.32215	6.71911	6.03035	6.34578	6.52871	6.43074	6.06985	5.80319	6.28583	6.21498	0.997749	0.932965	1.06533	1.00395	0.995849	0.936127	1.06149	1.01724	1.08112	0.970293	1.02105	1.05048	1.03472	0.976648	0.933742	1.0114	-0.00325119	-0.100105	0.0913037	0.00569224	-0.00600147	-0.095224	0.0860975	0.0246655	0.11252	-0.043508	0.0300478	0.0710482	0.049235
Q09161	NCBP1	Nuclear cap-binding protein subunit 1	36	6.36504	6.1662	6.4123	6.20981	6.3068	6.1135	6.43038	6.34749	6.54276	6.21842	6.17986	6.28665	6.27113	6.07679	5.95311	6.11974	6.28834	1.0122	0.980577	1.01971	0.987512	1.00294	0.972197	1.02259	1.00941	1.04046	0.988881	0.982749	0.999732	0.997264	0.966359	0.946691	0.973189	0.0174909	-0.028297	0.0281633	-0.0181295	0.00422953	-0.0406801	0.0322253	0.0135076	0.0572207	-0.0161306	-0.0251045	-0.000387205	-0.00395322
P49721	PSMB2	Proteasome subunit beta type-2	36	6.28088	6.4858	6.21	5.87191	6.30876	6.06022	6.11262	6.34742	6.51144	6.17111	6.35881	6.26527	6.1683	6.3584	6.31508	6.17398	6.21215	1.01106	1.04405	0.999654	0.94523	1.01555	0.975543	0.983979	1.02178	1.04818	0.993394	1.02361	1.00855	0.992942	1.02354	1.01657	0.993856	0.0158746	0.0621925	-0.000498817	-0.0812622	0.0222644	-0.0357219	-0.0233012	0.0310782	0.0678845	-0.00956207	0.0336647	0.0122846	-0.0102192
P18858	LIG1	DNA ligase 1	36	6.01228	6.07758	6.06838	6.363	6.11939	7.70102	6.04737	6.12655	6.15462	6.44487	6.0276	6.05534	5.98301	6.22468	6.64458	5.94975	6.13031	0.980746	0.991398	0.989898	1.03796	0.998219	1.25622	0.986471	0.999387	1.00397	1.05131	0.983246	0.987771	0.975972	1.01539	1.08389	0.970546	-0.0280478	-0.0124631	-0.0146486	0.0537471	-0.00257218	0.32909	-0.0196522	-0.000885142	0.00570975	0.0721912	-0.0243763	-0.0177521	-0.0350886
P63151-2	PPP2R2A	Isoform 2 of Serine/threonine-protein phosphatase 2A 55 kDa regulatory subunit B alpha isoform	36	6.75174	6.31198	6.43334	6.56211	6.23649	5.58749	6.4453	6.38749	5.934	5.98862	6.32172	6.36611	6.24883	5.83543	6.09	6.49934	6.51479	1.03637	0.968869	0.987497	1.00726	0.957281	0.857662	0.989333	0.980459	0.91085	0.919234	0.970364	0.977178	0.959176	0.89572	0.934796	0.997628	0.0515401	-0.0456266	-0.0181513	0.0104405	-0.0629849	-0.221519	-0.0154717	-0.0284701	-0.134714	-0.121496	-0.0434021	-0.0333071	-0.0601331
P39748	FEN1	Flap endonuclease 1	36	6.44084	6.19803	6.53765	6.63979	6.27145	5.30815	6.18875	6.54103	6.19628	5.84693	6.26007	6.50142	6.69941	5.90708	5.88802	6.57511	6.45408	0.997949	0.960328	1.01295	1.02877	0.971704	0.822449	0.95889	1.01347	0.960057	0.905928	0.96994	1.00734	1.03801	0.915248	0.912295	1.01875	-0.00296205	-0.0584012	0.0185612	0.0409267	-0.0414119	-0.282002	-0.0605629	0.0193069	-0.0588086	-0.142532	-0.0440321	0.010544	0.0538231
O00303	EIF3F	Eukaryotic translation initiation factor 3 subunit F	36	6.39716	6.22149	6.49724	6.32168	6.29038	6.13741	6.18707	6.32327	6.17059	6.3493	6.28075	6.18547	6.18685	6.08448	6.10622	6.26063	6.35939	1.00594	0.978315	1.02168	0.99407	0.989148	0.965094	0.972903	0.99432	0.970311	0.998413	0.987634	0.972651	0.972868	0.956771	0.960189	0.98447	0.00854261	-0.0316288	0.030938	-0.00858095	-0.0157418	-0.051259	-0.0396326	-0.00821813	-0.0434805	-0.00229141	-0.0179521	-0.0400057	-0.0396839
P47755	CAPZA2	F-actin-capping protein subunit alpha-2	36	6.43859	6.20145	6.18551	6.1446	6.32895	6.29434	6.19305	6.21118	6.4424	6.28334	6.10958	6.2094	6.6109	6.16464	6.00262	6.17947	6.24254	1.03141	0.993418	0.990865	0.984311	1.01384	1.0083	0.992073	0.994977	1.03202	1.00654	0.978701	0.994692	1.05901	0.987522	0.961567	0.989897	0.0446122	-0.009527	-0.01324	-0.0228135	0.0198336	0.0119225	-0.0114825	-0.00726521	0.0454657	0.00939907	-0.0310594	-0.00767871	0.0827141
Q9Y512	SAMM50	Sorting and assembly machinery component 50 homolog	36	6.23237	6.24924	5.96735	6.10923	6.20129	7.53126	5.97103	6.17378	5.87602	6.58073	6.26519	6.09016	6.05297	6.04314	6.61912	6.03712	6.13955	1.01512	1.01787	0.971953	0.995062	1.01006	1.22668	0.972552	1.00558	0.957077	1.07186	1.02046	0.991956	0.985898	0.984297	1.07811	0.983317	0.0216486	0.0255484	-0.0410419	-0.00714177	0.014436	0.294759	-0.0401525	0.00802174	-0.063293	0.100115	0.0292259	-0.0116522	-0.0204891
P14174	MIF	Macrophage migration inhibitory factor	36	6.24528	6.19214	6.46721	6.10013	6.35796	5.94592	6.56418	6.14785	6.7029	6.15044	6.3541	6.51684	6.10451	6.2327	5.88918	6.02866	6.25119	0.999055	0.990554	1.03456	0.975835	1.01708	0.951166	1.05007	0.983469	1.07226	0.983883	1.01646	1.0425	0.976536	0.997042	0.942089	0.964402	-0.0013646	-0.0136928	0.0490126	-0.0352909	0.0244331	-0.0722308	0.0704839	-0.0240489	0.100655	-0.0234412	0.0235569	0.0600417	-0.0342554
Q9Y4G6	TLN2	Talin-2	35	6.20736	6.24953	6.35829	6.10396	6.36409	6.03248	6.15312	6.18582	6.41331	6.37466	6.2764	6.18938	6.5247	6.2663	6.33025	5.97036	6.22979	0.9964	1.00317	1.02063	0.979803	1.02156	0.968329	0.987694	0.992943	1.02946	1.02326	1.00748	0.993514	1.04734	1.00586	1.01613	0.958357	-0.00520256	0.00456532	0.0294564	-0.0294369	0.0307719	-0.0464311	-0.0178642	-0.0102175	0.0418868	0.033166	0.0107549	-0.00938747	0.0667292
P55263	ADK	Adenosine kinase	35	6.44124	6.20713	6.34355	6.15141	6.29616	5.52094	6.47022	6.27325	6.35919	5.98242	6.349	6.33226	6.44057	6.28906	5.9467	6.59691	6.28583	1.02472	0.987479	1.00918	0.978615	1.00164	0.878315	1.02933	0.997998	1.01167	0.951731	1.01005	1.00739	1.02462	1.00051	0.946048	1.04949	0.0352346	-0.0181775	0.0131866	-0.0311867	0.00236837	-0.18719	0.0417109	-0.00289077	0.0167392	-0.0713746	0.0144255	0.0106167	0.0350845
Q9Y2A7-2	NCKAP1	Isoform 2 of Nck-associated protein 1	35	6.43744	6.33239	6.25161	6.14151	6.3324	6.48851	6.1914	6.3275	5.96577	6.15451	6.34365	6.114	6.33877	6.03847	6.33877	6.2033	6.29074	1.02332	1.00662	0.99378	0.976278	1.00662	1.03144	0.984209	1.00584	0.948342	0.978345	1.00841	0.971905	1.00764	0.959899	1.00764	0.986101	0.0332579	0.00952095	-0.00900138	-0.0346358	0.00952323	0.0446581	-0.0229635	0.00840644	-0.0765208	-0.0315852	0.012084	-0.0411126	0.0109738
P62851	RPS25	40S ribosomal protein S25	35	6.24576	6.34121	6.29983	6.13648	6.21183	6.65722	6.08947	6.36343	6.14314	6.25144	6.22737	5.92262	6.35899	6.28747	6.41641	6.04733	6.25582	0.998392	1.01365	1.00704	0.980923	0.992968	1.06416	0.973409	1.0172	0.981988	0.9993	0.995452	0.946738	1.01649	1.00506	1.02567	0.966673	-0.00232187	0.0195592	0.0101139	-0.0277877	-0.0101807	0.0897208	-0.0388823	0.0246056	-0.0262227	-0.00101045	-0.006576	-0.0789635	0.0235986
Q5T6F2	UBAP2	Ubiquitin-associated protein 2	35	6.34562	6.1745	6.48134	6.21812	6.32029	5.65882	6.51832	6.36457	6.29458	5.98452	6.26472	6.57043	6.46257	6.10786	5.924	6.30976	6.3049	1.00646	0.979318	1.02799	0.986237	1.00244	0.897528	1.03385	1.00946	0.998364	0.949186	0.993628	1.04212	1.02501	0.968749	0.939587	1.00077	0.00928879	-0.03015	0.0398198	-0.0199939	0.00351841	-0.155971	0.0480278	0.0135907	-0.00236223	-0.0752368	-0.00922231	0.0595154	0.0356357
Q9UMR2	DDX19B	ATP-dependent RNA helicase DDX19B	35	6.09087	6.12744	6.41309	6.17333	6.2841	6.19315	6.37498	6.25753	6.42606	6.38064	6.20592	6.20771	6.27827	6.28198	6.17365	6.13128	6.20118	0.982211	0.988108	1.03417	0.995509	1.01337	0.998705	1.02803	1.00909	1.03626	1.02894	1.00076	1.00105	1.01243	1.01303	0.99556	0.988728	-0.025895	-0.0172589	0.0484763	-0.00649443	0.0191628	-0.00186996	0.0398775	0.01305	0.0513911	0.0411578	0.00110175	0.00151781	0.0178237
Q9UKY7	CDV3	Protein CDV3 homolog	35	5.8156	5.84792	5.93289	6.54689	6.13296	7.95297	6.12978	6.01233	6.17206	6.20626	6.21322	6.02046	6.02821	6.25755	6.88338	5.84752	6.03582	0.963514	0.968868	0.982946	1.08467	1.01609	1.31763	1.01557	0.996107	1.02257	1.02824	1.02939	0.997454	0.998738	1.03673	1.14042	0.968802	-0.0536229	-0.0456274	-0.0248159	0.117259	0.0230326	0.397943	0.0222843	-0.00562678	0.0322011	0.0401732	0.0417902	-0.00367726	-0.0018213
O00116	AGPS	Alkyldihydroxyacetonephosphate synthase, peroxisomal	35	6.16232	6.06353	6.27994	6.27363	6.25117	5.94866	6.40545	6.42488	6.36566	6.26122	6.24003	6.30412	6.52247	6.1902	6.11385	6.19288	6.19486	0.994748	0.978801	1.01373	1.01272	1.00909	0.960258	1.034	1.03713	1.02757	1.01071	1.00729	1.01764	1.05289	0.999249	0.986924	0.999681	-0.00759691	-0.0309126	0.0196803	0.0182299	0.0130557	-0.0585058	0.0482294	0.052599	0.0392396	0.0153733	0.0104825	0.0252245	0.0743479
Q99615	DNAJC7	DnaJ homolog subfamily C member 7	35	6.02477	5.99286	5.84991	6.35809	6.29228	5.45818	6.40744	6.81908	6.03961	6.24752	6.76277	6.53879	5.65022	6.34422	6.38044	6.83382	6.05641	0.994776	0.989507	0.965904	1.04981	1.03895	0.901224	1.05796	1.12593	0.997226	1.03156	1.11663	1.07965	0.932933	1.04752	1.0535	1.12836	-0.00755611	-0.0152176	-0.0500478	0.0701312	0.0551206	-0.150042	0.0812858	0.171115	-0.00400689	0.0448213	0.159152	0.110561	-0.100155
Q9H074	PAIP1	Polyadenylate-binding protein-interacting protein 1	35	6.20934	6.19588	6.21171	6.61827	6.41885	6.20991	6.13726	6.30438	6.04653	6.16008	6.32721	5.98405	6.08604	6.36258	6.62286	6.10505	6.3088	0.984235	0.982101	0.98461	1.04905	1.01744	0.984325	0.972809	0.999299	0.958428	0.976427	1.00292	0.948524	0.964691	1.00852	1.04978	0.967704	-0.0229257	-0.0260564	-0.0223751	0.0690885	0.0249492	-0.0227933	-0.0397709	-0.00101112	-0.0612582	-0.0344165	0.00420386	-0.0762434	-0.0518618
P51148-2	RAB5C	Isoform 2 of Ras-related protein Rab-5C	35	6.54942	6.19908	6.37971	6.19191	6.33438	6.0895	6.40233	6.03421	6.4841	6.35208	6.25356	6.31664	6.15262	6.22344	5.84208	6.19494	6.33003	1.03466	0.979313	1.00785	0.97818	1.00069	0.962002	1.01142	0.953267	1.02434	1.00348	0.987919	0.997885	0.971973	0.983161	0.922915	0.978659	0.0491548	-0.0301582	0.0112785	-0.0318278	0.00099108	-0.0558886	0.0163847	-0.0690474	0.034694	0.00501675	-0.0175346	-0.00305499	-0.0410114
O75347	TBCA	Tubulin-specific chaperone A	35	6.22432	6.13553	5.84651	6.67502	6.27476	6.83161	6.01768	6.16061	5.51593	6.03104	6.44297	6.28806	6.00108	6.12873	6.83066	6.59549	6.22035	1.00064	0.986365	0.939901	1.07309	1.00875	1.09827	0.967419	0.990397	0.886756	0.969567	1.03579	1.01089	0.96475	0.985272	1.09812	1.06031	0.000921634	-0.0198066	-0.0894189	0.101778	0.0125657	0.135231	-0.0477872	-0.0139214	-0.17339	-0.0445878	0.0507313	0.0156204	-0.0517724
P50570	DNM2	Dynamin-2	35	6.29708	6.23545	6.46108	6.3759	6.35335	5.99638	6.03567	6.21986	6.38441	6.33262	6.2076	6.331	6.25628	5.97156	6.18469	6.35707	6.34238	0.992858	0.983141	1.01872	1.00529	1.00173	0.945447	0.951642	0.980683	1.00663	0.998462	0.97875	0.998206	0.986425	0.941533	0.975137	1.00232	-0.0103408	-0.0245301	0.0267516	0.00760525	0.00249375	-0.0809319	-0.0715098	-0.0281416	0.00952955	-0.00222124	-0.0309882	-0.00259035	-0.0197187
Q9UQB8	BAIAP2	Brain-specific angiogenesis inhibitor 1-associated protein 2	35	6.08104	6.1506	6.40881	6.14005	6.04831	5.83585	6.35575	6.16447	6.57749	6.571	6.37468	6.35643	6.24615	6.36816	6.20437	6.11683	6.19512	0.981585	0.992813	1.03449	0.99111	0.976302	0.942007	1.02593	0.995052	1.06172	1.06067	1.02898	1.02604	1.00824	1.02793	1.00149	0.987362	-0.0268153	-0.0104062	0.0489231	-0.012883	-0.0346013	-0.0861906	0.036929	-0.00715653	0.0864038	0.0849795	0.0412195	0.0370833	0.0118338
P04181	OAT	Ornithine aminotransferase, mitochondrial	35	6.31884	6.19954	6.18928	6.0291	6.40742	6.14616	6.01077	6.22995	6.56131	6.29332	6.22102	6.45723	6.75253	6.26495	5.91282	6.00575	6.18419	1.02177	1.00248	1.00082	0.974922	1.0361	0.99385	0.971958	1.0074	1.06098	1.01765	1.00596	1.04415	1.0919	1.01306	0.956119	0.971146	0.0310751	0.00357653	0.00118695	-0.036642	0.0511589	-0.00889932	-0.0410348	0.0106359	0.0853992	0.0252367	0.0085665	0.0623308	0.126843
O15212	PFDN6	Prefoldin subunit 6	35	6.57999	6.69957	6.05582	6.10709	6.29168	6.50679	6.00911	5.91513	5.98548	6.04192	6.1763	6.27378	6.15532	5.99489	6.5385	6.66865	6.36062	1.03449	1.05329	0.952081	0.960141	0.989162	1.02298	0.944737	0.929962	0.941022	0.949895	0.971022	0.986348	0.967724	0.942501	1.02797	1.04843	0.0489186	0.0749017	-0.0708445	-0.0586817	-0.0157215	0.0327792	-0.0820155	-0.104757	-0.0876999	-0.0741597	-0.042424	-0.0198319	-0.047333
P49593	PPM1F	Protein phosphatase 1F	35	6.28051	6.08282	6.31313	6.02073	6.31051	6.75835	6.34213	6.31229	6.08427	6.33221	6.20302	6.15418	6.02768	6.21222	6.26274	6.30321	6.1743	1.0172	0.985184	1.02249	0.975128	1.02206	1.09459	1.02718	1.02235	0.985419	1.02558	1.00465	0.996742	0.976254	1.00614	1.01432	1.02088	0.0246067	-0.0215347	0.0320805	-0.0363366	0.0314816	0.130396	0.0386925	0.0318885	-0.0211908	0.0364341	0.00669578	-0.00470836	-0.0346722
Q99614	TTC1	Tetratricopeptide repeat protein 1	35	6.15091	6.40355	5.98163	6.15833	6.22923	6.94549	6.21838	6.35711	5.91812	6.34994	6.29256	6.16476	5.71214	6.41927	6.51534	6.18324	6.1736	0.996324	1.03725	0.968904	0.997526	1.00901	1.12503	1.00725	1.02972	0.958617	1.02856	1.01927	0.998567	0.925252	1.03979	1.05535	1.00156	-0.00531331	0.0527587	-0.0455745	-0.003574	0.0129407	0.169963	0.0104256	0.0422579	-0.0609742	0.0406298	0.0275339	-0.00206845	-0.112082
Q9H3S7	PTPN23	Tyrosine-protein phosphatase non-receptor type 23	35	6.30053	6.34701	6.30951	6.37074	6.29182	6.3985	5.93231	6.16965	6.16866	6.26271	6.19146	6.31803	6.42076	5.97153	6.35206	6.19473	6.33195	0.995038	1.00238	0.996456	1.00613	0.993663	1.01051	0.936886	0.974368	0.974212	0.989065	0.977813	0.997802	1.01403	0.94308	1.00318	0.978329	-0.0071761	0.00342782	-0.00512132	0.00881167	-0.0091719	0.0150844	-0.0940553	-0.0374606	-0.0376922	-0.0158622	-0.0323696	-0.00317451	0.0200948
Q9UMX0	UBQLN1	Ubiquilin-1	35	6.03212	6.24176	6.3506	6.0756	6.29359	7.04822	6.29929	6.03896	6.52747	6.07907	6.34908	6.38875	5.70305	6.38391	5.917	6.27152	6.17502	0.976858	1.01081	1.02843	0.9839	1.0192	1.14141	1.02012	0.977966	1.05708	0.984462	1.02819	1.03461	0.923568	1.03383	0.958216	1.01563	-0.0337787	0.0155091	0.0404491	-0.0234169	0.0274394	0.190815	0.0287454	-0.0321437	0.0800801	-0.0225932	0.0401037	0.0490899	-0.11471
P62249	RPS16	40S ribosomal protein S16	35	6.29238	6.29769	6.47857	6.1994	6.05491	6.16856	6.34238	6.19262	6.06932	6.26382	6.15864	6.24528	6.1534	6.54405	6.09871	6.44028	6.31701	0.996101	0.996942	1.02558	0.981382	0.958509	0.9765	1.00402	0.980309	0.96079	0.99158	0.97493	0.988645	0.9741	1.03594	0.965443	1.01951	-0.00563606	-0.00441911	0.0364335	-0.0271133	-0.0611363	-0.0343081	0.00578246	-0.0286919	-0.057707	-0.0121991	-0.0366301	-0.0164756	-0.0378581
Q9UNS2	COPS3	COP9 signalosome complex subunit 3	35	5.9573	5.96133	6.58071	5.72931	6.01726	5.63424	6.90383	6.13889	7.19657	6.61849	6.23423	6.50677	6.28592	6.81428	5.68393	5.73694	6.05716	0.983513	0.984179	1.08643	0.945874	0.993412	0.930178	1.13978	1.01349	1.18811	1.09267	1.02923	1.07423	1.03777	1.125	0.938382	0.947133	-0.0239835	-0.0230079	0.119601	-0.0802807	-0.00953542	-0.104421	0.188755	0.0193357	0.248667	0.12786	0.0415693	0.103299	0.0534818
P37108	SRP14	Signal recognition particle 14 kDa protein	35	6.03363	6.03106	6.0986	6.19607	6.23143	7.21531	6.18417	6.05348	6.16437	6.57988	6.16815	6.11835	6.17132	6.3861	6.37226	5.99582	6.08984	0.99077	0.990348	1.00144	1.01744	1.02325	1.18481	1.01549	0.994029	1.01224	1.08047	1.01286	1.00468	1.01338	1.04865	1.04638	0.984561	-0.0133781	-0.0139927	0.00207377	0.0249491	0.0331589	0.244657	0.0221757	-0.00863957	0.0175491	0.111657	0.0184335	0.00673831	0.0191748
P21283	ATP6V1C1	V-type proton ATPase subunit C 1	35	6.36025	6.28233	6.32583	6.20698	6.28446	5.92897	6.21918	6.29514	6.13269	6.27267	6.42906	6.32326	5.97749	6.21335	6.28165	6.46668	6.29385	1.01055	0.99817	1.00508	0.986198	0.998508	0.942026	0.988136	1.00021	0.974394	0.996635	1.02148	1.00467	0.949735	0.98721	0.998062	1.02746	0.0151413	-0.0026425	0.00731256	-0.0200507	-0.00215344	-0.0861607	-0.0172178	0.00029624	-0.0374222	-0.00486256	0.0306656	0.00672632	-0.0744024
P62917	RPL8	60S ribosomal protein L8	35	5.67536	6.13693	5.33581	6.45341	6.02037	10.9163	5.21451	5.65901	5.08416	7.24172	5.93066	5.31664	5.51884	6.22294	7.48803	5.78531	5.90038	0.961864	1.04009	0.904317	1.09373	1.02034	1.8501	0.883759	0.959093	0.861667	1.22733	1.00513	0.901068	0.935337	1.05467	1.26908	0.980498	-0.0560954	0.0567099	-0.1451	0.129254	0.0290449	0.887605	-0.178276	-0.0602576	-0.214798	0.295525	0.00738541	-0.150292	-0.0964422
O00203	AP3B1	AP-3 complex subunit beta-1	35	6.18349	6.10986	6.51243	6.37232	6.27451	5.80803	6.35005	6.28203	6.34477	6.23333	6.42448	6.42642	6.24511	6.10024	6.14224	6.19071	6.29453	0.98236	0.970663	1.03462	1.01236	0.99682	0.922711	1.00882	0.998015	1.00798	0.990278	1.02065	1.02095	0.99215	0.969134	0.975807	0.983507	-0.0256762	-0.0429582	0.0490984	0.0177212	-0.00459471	-0.116049	0.0126704	-0.00286668	0.0114704	-0.0140944	0.0294822	0.0299178	-0.0113705
O60566-3	BUB1B	Isoform 3 of Mitotic checkpoint serine/threonine-protein kinase BUB1 beta	35	6.11294	6.12692	6.27533	6.35768	6.28296	6.29433	6.20241	6.32133	6.35582	6.31492	6.23616	6.31766	6.25313	6.16889	6.22292	6.1566	6.21822	0.98307	0.985318	1.00918	1.02243	1.01041	1.01224	0.997458	1.01658	1.02213	1.01555	1.00289	1.01599	1.00561	0.992067	1.00076	0.990091	-0.0246347	-0.0213391	0.0131902	0.0319993	0.0149433	0.0175517	-0.00367218	0.0237271	0.0315772	0.0222634	0.00415686	0.0228892	0.00807743
O60568	PLOD3	Multifunctional procollagen lysine hydroxylase and glycosyltransferase LH3	35	6.43664	6.2157	6.42062	6.21115	6.36357	6.17284	6.15668	6.23815	6.0872	6.38338	6.34334	6.26304	6.17316	6.03608	6.23919	6.25927	6.32103	1.01829	0.983337	1.01576	0.982617	1.00673	0.976556	0.974	0.986889	0.963008	1.00986	1.00353	0.990826	0.976607	0.954921	0.987053	0.99023	0.0261487	-0.0242422	0.0225535	-0.0252987	0.00967726	-0.0342247	-0.0380065	-0.0190408	-0.0543803	0.0141614	0.00508358	-0.013296	-0.0341499
P09012	SNRPA	U1 small nuclear ribonucleoprotein A	35	6.32767	6.30839	6.35433	6.04021	6.2507	6.06312	6.55621	6.24566	6.32612	6.35006	6.16777	6.25018	6.14406	6.43505	6.04212	6.13836	6.25765	1.01119	1.00811	1.01545	0.965252	0.998889	0.968913	1.04771	0.998084	1.01094	1.01477	0.985637	0.998806	0.981848	1.02835	0.965557	0.980937	0.0160534	0.0116509	0.022119	-0.0510223	-0.00160321	-0.0455606	0.0672411	-0.00276693	0.0157	0.0211493	-0.020872	-0.00172323	-0.0264287
P35573	AGL	Glycogen debranching enzyme	35	6.253	6.22175	6.39123	6.43226	6.30076	6.26964	5.9674	6.57896	6.38543	6.21057	6.16971	6.05611	6.10817	6.04359	6.45491	6.15651	6.32456	0.988685	0.983744	1.01054	1.01703	0.996237	0.991316	0.943528	1.04022	1.00962	0.981977	0.975516	0.957554	0.965786	0.955575	1.02061	0.973429	-0.0164166	-0.0236447	0.0151285	0.0243606	-0.00543926	-0.0125825	-0.0838626	0.0568944	0.0138187	-0.0262394	-0.0357624	-0.0625737	-0.0502249
Q9NUQ9	FAM49B	Protein FAM49B	35	6.51429	6.47558	5.87126	6.78631	6.47345	6.36652	5.95896	6.46828	5.47377	5.84524	6.31535	5.99503	6.16893	5.89951	6.60983	6.77769	6.41186	1.01598	1.00994	0.915687	1.0584	1.00961	0.992929	0.929365	1.0088	0.853695	0.911629	0.984948	0.934991	0.962112	0.920093	1.03088	1.05706	0.022865	0.0142665	-0.127073	0.0818844	0.0137919	-0.0102379	-0.105682	0.0126392	-0.228208	-0.133481	-0.0218802	-0.096976	-0.0557226
Q14254	FLOT2	Flotillin-2	35	6.25715	6.17568	6.32615	5.96848	6.33899	6.00426	6.3947	6.27971	6.63239	6.32614	6.11206	6.33624	6.36745	6.43218	5.9649	6.08353	6.18187	1.01218	0.998999	1.02334	0.965482	1.02542	0.97127	1.03443	1.01583	1.07288	1.02334	0.988708	1.02497	1.03002	1.04049	0.964903	0.984093	0.0174635	-0.00144415	0.0332856	-0.0506786	0.0362108	-0.0420557	0.0488345	0.0226558	0.101487	0.0332833	-0.0163834	0.0355848	0.0426736
P62633-4	CNBP	Isoform 4 of Cellular nucleic acid-binding protein	35	6.20928	6.38418	6.12558	6.13841	6.3526	5.51937	6.43344	6.28998	6.33193	6.57111	6.17437	6.32805	6.02651	6.51051	6.34201	6.26266	6.21436	0.999182	1.02733	0.985713	0.987778	1.02224	0.888164	1.03525	1.01217	1.01892	1.05741	0.993565	1.01829	0.969771	1.04766	1.02054	1.00777	-0.00118041	0.0388949	-0.0207599	-0.0177414	0.0317408	-0.171103	0.049984	0.017449	0.0270389	0.0805307	-0.00931446	0.0261546	-0.0442836
Q15758	SLC1A5	Neutral amino acid transporter B(0)	35	6.13675	6.0219	6.19441	6.65141	6.26165	5.89355	6.37281	6.35051	6.3095	6.21724	6.35303	6.41194	6.09532	6.34949	6.27241	6.1081	6.25112	0.981704	0.963332	0.990928	1.06404	1.00168	0.942799	1.01947	1.0159	1.00934	0.994581	1.0163	1.02573	0.975077	1.01574	1.00341	0.977121	-0.0266393	-0.0538954	-0.0131472	0.0895461	0.00242875	-0.0849772	0.0278155	0.0227583	0.0134116	-0.00783985	0.0233307	0.0366468	-0.0364122
Q9UIQ6	LNPEP	Leucyl-cystinyl aminopeptidase	35	6.26866	6.30817	6.35164	6.08027	6.31838	5.75954	6.3326	6.23418	6.40007	6.21676	6.48489	6.38757	6.50202	6.25363	5.89561	6.20602	6.25218	1.00264	1.00895	1.01591	0.972503	1.01059	0.921204	1.01286	0.99712	1.02365	0.994334	1.03722	1.02165	1.03996	1.00023	0.942968	0.992616	0.00379662	0.0128611	0.0227687	-0.0402251	0.0151942	-0.118407	0.0184375	-0.00416066	0.0337272	-0.00819758	0.0527216	0.0309067	0.0565275
Q9H9T3	ELP3	Elongator complex protein 3	35	6.25362	6.22159	6.22193	6.16095	6.29669	6.08929	6.27013	6.31003	6.35401	6.46078	6.27035	6.34878	6.47715	6.31562	5.96217	5.9869	6.21452	1.00629	1.00114	1.00119	0.991379	1.01322	0.979848	1.00895	1.01537	1.02245	1.03963	1.00898	1.0216	1.04226	1.01627	0.959393	0.963372	0.00904801	0.00163978	0.00171862	-0.0124907	0.0189501	-0.0293695	0.0128518	0.0220033	0.0320238	0.0560648	0.0129024	0.0308358	0.0597156
P16150	SPN	Leukosialin	35	6.03769	5.86671	6.4645	6.10242	6.31173	5.86642	6.39981	6.2095	6.21646	6.45918	6.45723	6.39311	6.09473	6.52341	6.3577	6.23939	6.11783	0.986901	0.958953	1.05667	0.997481	1.03169	0.958905	1.04609	1.01498	1.01612	1.0558	1.05548	1.045	0.996224	1.06629	1.03921	1.01987	-0.0190233	-0.0604683	0.0795188	-0.00363854	0.0450155	-0.0605397	0.0650091	0.0214571	0.0230732	0.078331	0.0778954	0.0634979	-0.00545771
Q53H12	AGK	Acylglycerol kinase, mitochondrial	34	6.09663	6.16356	6.48286	6.2644	6.07521	5.98986	6.27567	6.24456	6.34805	6.37904	6.24016	6.33472	6.69313	6.31262	6.09762	6.00192	6.25186	0.97517	0.985876	1.03695	1.00201	0.971744	0.958092	1.00381	0.998832	1.01539	1.02034	0.998128	1.01325	1.07058	1.00972	0.975329	0.960021	-0.0362741	-0.0205222	0.0523444	0.00289029	-0.0413518	-0.0617638	0.00548344	-0.00168613	0.0220274	0.0290533	-0.00270303	0.0189948	0.098395
Q01085-2	TIAL1	Isoform 2 of Nucleolysin TIAR	34	6.20011	6.096	6.3784	6.12604	6.27585	5.9566	6.39675	6.21987	6.43086	6.27319	6.2486	6.35301	6.42036	6.38379	6.16769	6.07289	6.20014	0.999996	0.983204	1.02875	0.988049	1.01221	0.960721	1.03171	1.00318	1.03721	1.01178	1.00782	1.02466	1.03552	1.02962	0.994767	0.979477	-6.39892e-06	-0.0244373	0.0408944	-0.0173454	0.0175107	-0.0578111	0.0450389	0.00458422	0.0527115	0.016899	0.0112328	0.0351401	0.050354
Q04917	YWHAH	14-3-3 protein eta	34	6.02189	6.07389	5.84542	6.21966	6.25029	8.73867	5.89425	6.05059	5.68665	6.54092	6.03463	5.74505	5.66969	6.2982	6.98753	5.94269	6.04021	0.996966	1.00558	0.96775	1.02971	1.03478	1.44675	0.975834	1.00172	0.941465	1.0829	0.999075	0.951133	0.938657	1.04271	1.15683	0.983854	-0.00438355	0.00802088	-0.0472932	0.0422358	0.0493232	0.532814	-0.0352917	0.00247593	-0.0870209	0.114894	-0.00133458	-0.0722805	-0.09133
O14556	GAPDHS	Glyceraldehyde-3-phosphate dehydrogenase, testis-specific	34	6.96088	6.66303	5.6281	6.89655	6.67988	6.6337	5.32894	6.25737	4.91428	5.96518	6.56023	6.21713	6.20655	5.25092	6.74162	7.09565	6.53714	1.06482	1.01926	0.860942	1.05498	1.02184	1.01477	0.815179	0.957203	0.751748	0.912506	1.00353	0.951047	0.949429	0.803244	1.03128	1.08544	0.0906101	0.0275188	-0.216012	0.0772152	0.0311626	0.0211542	-0.294811	-0.0631032	-0.41168	-0.132094	0.0050868	-0.0724108	-0.074868
P41227	NAA10	N-alpha-acetyltransferase 10	34	6.35229	6.22655	6.18861	6.45149	6.40435	6.3043	6.15607	6.23907	5.98696	6.12257	6.21858	6.03401	6.51252	5.98334	6.39341	6.4259	6.30473	1.00754	0.987599	0.981581	1.02328	1.0158	0.999931	0.97642	0.989585	0.949597	0.971107	0.986335	0.95706	1.03296	0.949023	1.01406	1.01922	0.010841	-0.0180027	-0.0268203	0.0331967	0.0226164	-9.95433e-05	-0.0344261	-0.0151047	-0.0746121	-0.0422984	-0.0198506	-0.0633186	0.0467802
O14745	SLC9A3R1	Na(+)/H(+) exchange regulatory cofactor NHE-RF1	34	6.18367	6.21632	6.09692	6.22875	6.13581	6.09534	6.33897	6.36263	6.28337	6.34936	6.18102	6.1495	6.29067	6.45112	6.52317	6.11337	6.18141	1.00036	1.00565	0.986331	1.00766	0.992622	0.986075	1.02549	1.02932	1.01649	1.02717	0.999936	0.994837	1.01767	1.04363	1.05529	0.988992	0.000526204	0.00812365	-0.0198565	0.0110055	-0.0106833	-0.0202304	0.0363113	0.0416861	0.0236014	0.0386741	-9.21929e-05	-0.00746801	0.0252766
P19367-2	HK1	Isoform 2 of Hexokinase-1	34	6.36953	6.42328	6.24393	6.3279	6.21596	6.26141	6.05634	6.46058	6.15647	6.27697	6.08675	6.19597	6.33149	5.84693	6.31637	6.43012	6.34116	1.00447	1.01295	0.984667	0.997909	0.980256	0.987423	0.955084	1.01883	0.970874	0.989877	0.95988	0.977104	0.998475	0.92206	0.996091	1.01403	0.00644014	0.0185634	-0.0222924	-0.00301998	-0.0287696	-0.0182592	-0.0663006	0.0269169	-0.0426434	-0.0146785	-0.0590747	-0.0334166	-0.00220173
P02549	SPTA1	Spectrin alpha chain, erythrocytic 1	34	6.33047	6.17435	6.50497	6.24588	6.09284	5.92105	6.48412	6.15868	6.67888	6.3596	6.11715	6.26759	6.21169	6.35752	6.07157	6.02361	6.31392	1.00262	0.977895	1.03026	0.989224	0.964986	0.937778	1.02696	0.975413	1.0578	1.00724	0.968836	0.992663	0.983809	1.00691	0.961617	0.954021	0.00377721	-0.0322481	0.043007	-0.0156306	-0.0514206	-0.0926824	0.0383754	-0.0359142	0.0810708	0.0104006	-0.0456758	-0.0106246	-0.0235496
Q9H3K2	GHITM	Growth hormone-inducible transmembrane protein	34	6.42893	5.93198	6.63816	5.99713	6.3131	5.81401	6.43368	6.44156	6.40404	6.36165	6.35168	6.16883	6.65079	6.31667	5.88507	5.86272	6.24905	1.02879	0.949261	1.06227	0.959687	1.01025	0.930383	1.02955	1.03081	1.0248	1.01802	1.01642	0.987163	1.06429	1.01082	0.941754	0.938178	0.0409418	-0.0751231	0.0871465	-0.0593646	0.0147117	-0.104103	0.0420073	0.0437732	0.0353454	0.0257641	0.0235013	-0.01864	0.0898888
P61163	ACTR1A	Alpha-centractin	34	5.98339	6.05055	6.25456	6.65053	6.01448	6.42135	6.22142	6.15222	6.43094	6.36917	6.19488	6.24681	6.26558	6.20237	6.54022	6.00152	6.23476	0.959683	0.970455	1.00318	1.06669	0.964669	1.02993	0.997861	0.986762	1.03147	1.02156	0.993604	1.00193	1.00494	0.994805	1.04899	0.962591	-0.0593703	-0.0432672	0.00457495	0.0931359	-0.0518934	0.0425432	-0.00308954	-0.0192264	0.0446962	0.0307719	-0.00925711	0.0027862	0.00711462
O43290	SART1	U4/U6.U5 tri-snRNP-associated protein 1	34	6.17058	6.05072	6.47727	6.41886	6.25223	5.71808	6.50143	6.19515	6.47035	6.39687	6.44949	6.28769	6.15281	6.25823	6.10517	6.09507	6.27936	0.982677	0.963589	1.03152	1.02222	0.99568	0.910615	1.03537	0.98659	1.03042	1.01871	1.02709	1.00133	0.979847	0.996635	0.97226	0.970652	-0.0252108	-0.0535101	0.0447689	0.0317001	-0.0062461	-0.135086	0.0501401	-0.0194777	0.0432268	0.0267492	0.0385681	0.00191314	-0.0293715
Q8N766	EMC1	ER membrane protein complex subunit 1	34	6.42197	6.26432	6.51413	6.29166	6.37861	5.90295	6.3135	6.39328	6.2149	5.93547	6.3565	6.45756	6.29407	6.04693	5.94947	6.26467	6.37302	1.00768	0.982944	1.02214	0.987234	1.00088	0.926241	0.990661	1.00318	0.975189	0.931343	0.997408	1.01327	0.987612	0.948833	0.93354	0.982999	0.0110387	-0.0248193	0.0315953	-0.0185365	0.00126488	-0.110541	-0.0135372	0.00457909	-0.036246	-0.102615	-0.00374458	0.019012	-0.017984
Q9HC35	EML4	Echinoderm microtubule-associated protein-like 4	34	6.42183	6.3489	6.33397	6.09395	6.29059	6.01586	6.33118	6.31856	6.20935	6.16966	6.33561	6.13621	6.2032	6.34975	6.1872	6.25419	6.29966	1.01939	1.00782	1.00545	0.967345	0.99856	0.95495	1.005	1.003	0.985664	0.979364	1.00571	0.974054	0.984688	1.00795	0.982148	0.992782	0.0277099	0.0112321	0.00783549	-0.0478969	-0.0020792	-0.0665035	0.00719987	0.00432127	-0.0208323	-0.0300836	0.00820899	-0.0379267	-0.0222619
Q8NI27	THOC2	THO complex subunit 2	34	6.23045	6.17339	6.40251	6.30931	6.18106	5.8898	6.27275	6.39579	6.34778	6.36814	6.4022	6.40005	6.10579	6.14418	6.20793	6.16887	6.27892	0.992281	0.983194	1.01968	1.00484	0.984415	0.938028	0.999018	1.01861	1.01097	1.01421	1.01963	1.01929	0.972428	0.978542	0.988695	0.982474	-0.0111789	-0.0244523	0.0281223	0.00696696	-0.022661	-0.0922966	-0.00141722	0.0266073	0.0157368	0.0203568	0.0280525	0.0275679	-0.0403373
P67936	TPM4	Tropomyosin alpha-4 chain	34	6.15344	6.25465	5.87754	6.48938	6.27721	7.6414	5.86183	6.07144	5.29512	6.5151	6.23585	5.78157	5.81479	6.11733	7.19045	6.42292	6.19375	0.993491	1.00983	0.948947	1.04773	1.01347	1.23373	0.94641	0.980252	0.854913	1.05188	1.0068	0.933452	0.938815	0.987661	1.16092	1.037	-0.00942058	0.0141154	-0.0756013	0.0672669	0.0193097	0.303023	-0.0794626	-0.028775	-0.22615	0.0729736	0.00977249	-0.0993524	-0.0910866
Q5JSL3	DOCK11	Dedicator of cytokinesis protein 11	34	6.33664	6.20225	6.34639	6.27644	6.31717	5.92542	6.35925	6.49767	6.43138	6.11527	6.20251	6.32351	6.14425	6.16941	6.09954	6.25288	6.29043	1.00735	0.985982	1.0089	0.997776	1.00425	0.941974	1.01094	1.03295	1.02241	0.972155	0.986023	1.00526	0.976762	0.980761	0.969654	0.994031	0.0105594	-0.020367	0.0127775	-0.00321215	0.00611976	-0.0862412	0.015698	0.0467638	0.0319697	-0.0407424	-0.0203065	0.00756694	-0.0339217
O15027-5	SEC16A	Isoform 5 of Protein transport protein Sec16A	34	6.39314	6.33695	6.45475	6.29055	6.16892	6.22508	6.43324	6.09784	6.41354	6.29432	6.16237	6.22938	5.97618	6.24299	5.96256	6.3182	6.36885	1.00381	0.994992	1.01349	0.987706	0.968609	0.977426	1.01011	0.957448	1.00702	0.988298	0.96758	0.978102	0.938346	0.980239	0.936207	0.992048	0.00549236	-0.0072437	0.0193289	-0.0178462	-0.0460144	-0.0329399	0.0145132	-0.062734	0.0100886	-0.0169818	-0.047547	-0.0319437	-0.0918087
Q96DG6	CMBL	Carboxymethylenebutenolidase homolog	34	6.47518	6.05176	6.25517	6.04922	6.27011	5.39268	6.41932	6.28903	6.40415	6.09192	6.0989	6.47425	7.01356	6.16634	5.83001	6.71843	6.20783	1.04307	0.974859	1.00763	0.97445	1.01003	0.86869	1.03407	1.01308	1.03162	0.981328	0.982452	1.04292	1.12979	0.993316	0.939138	1.08225	0.0608307	-0.0367349	0.0109595	-0.0373405	0.0144011	-0.203087	0.0483308	0.0187479	0.0449175	-0.0271926	-0.0255406	0.0606234	0.176057
Q06210	GFPT1	Glutamine--fructose-6-phosphate aminotransferase [isomerizing] 1	34	5.92676	6.04911	6.28994	6.51355	6.15467	6.56647	6.22989	6.21654	6.23826	6.37368	6.1663	6.16473	6.36625	6.26385	6.28455	6.19544	6.19484	0.956725	0.976476	1.01535	1.05145	0.993516	1.05999	1.00566	1.0035	1.00701	1.02887	0.995393	0.99514	1.02767	1.01114	1.01448	1.0001	-0.0638234	-0.0343441	0.0219792	0.072377	-0.00938552	0.084051	0.00813967	0.00504481	0.0100767	0.0410596	-0.00666194	-0.00702931	0.0393768
P14550	AKR1A1	Aldo-keto reductase family 1 member A1	34	6.30208	6.13617	6.25426	6.11291	6.26246	5.95601	6.3854	6.30204	6.53371	6.31711	6.08388	6.19797	6.3274	6.27653	6.1814	6.37065	6.20135	1.01624	0.989489	1.00853	0.985738	1.00985	0.960437	1.02968	1.01624	1.05359	1.01867	0.981057	0.999454	1.02033	1.01212	0.996782	1.0273	0.0232446	-0.015245	0.0122557	-0.0207242	0.014146	-0.0582373	0.0421935	0.0232354	0.0753189	0.0266812	-0.0275918	-0.000787708	0.0290293
P35269	GTF2F1	General transcription factor IIF subunit 1	34	5.94952	6.07299	6.10715	6.22468	6.25494	6.68981	6.1576	6.12453	6.34638	6.64901	6.19223	6.22464	6.29365	6.48073	6.35367	5.87846	6.08859	0.97716	0.997439	1.00305	1.02235	1.02732	1.09875	1.01134	1.0059	1.04234	1.09205	1.01702	1.02235	1.03368	1.06441	1.04354	0.965489	-0.0333337	-0.00369999	0.0043923	0.0318927	0.0388891	0.135858	0.0162612	0.00849215	0.0598269	0.127033	0.0243521	0.0318834	0.04779
P61313	RPL15	60S ribosomal protein L15	34	6.37491	6.18628	6.26982	6.16708	6.30381	5.76198	6.31453	6.2908	6.2843	6.2008	6.39937	6.40413	6.50009	6.29931	5.95891	6.28388	6.24952	1.02006	0.98988	1.00325	0.986808	1.00869	0.921987	1.0104	1.0066	1.00556	0.992204	1.02398	1.02474	1.04009	1.00797	0.953498	1.0055	0.028659	-0.0146738	0.00467806	-0.0191584	0.0124781	-0.117181	0.0149294	0.00949753	0.00800609	-0.0112916	0.0341839	0.0352566	0.0567137
Q12905	ILF2	Interleukin enhancer-binding factor 2	34	6.07632	5.96625	6.35702	6.15493	6.3606	5.95243	6.40718	6.20805	6.60982	6.25529	6.24372	6.3349	6.48085	6.38316	6.05589	6.15361	6.13863	0.98985	0.971919	1.03558	1.00266	1.03616	0.969667	1.04375	1.01131	1.07676	1.019	1.01712	1.03197	1.05575	1.03983	0.986521	1.00244	-0.0147189	-0.0410923	0.0504339	0.00382573	0.0512461	-0.044438	0.0617728	0.0162235	0.106694	0.0271601	0.0244891	0.0454051	0.0782663
P46459	NSF	Vesicle-fusing ATPase	34	6.32092	6.1965	6.33518	6.30344	6.22636	6.06235	6.27248	6.2904	6.23483	6.18089	6.27571	6.09255	6.24149	6.103	6.3718	6.4921	6.28901	1.00507	0.98529	1.00734	1.00229	0.990038	0.963959	0.997372	1.00022	0.991385	0.982808	0.997885	0.968761	0.992444	0.970423	1.01316	1.03229	0.00730163	-0.0213794	0.0105527	0.00330644	-0.0144439	-0.0529558	-0.00379696	0.00031883	-0.0124827	-0.0250183	-0.00305424	-0.0457867	-0.0109425
P13073	COX4I1	Cytochrome c oxidase subunit 4 isoform 1, mitochondrial	34	6.12515	6.12085	6.26397	6.50693	6.20809	5.70994	6.3702	6.16751	6.61658	6.15105	6.27626	6.37358	6.22968	6.36793	6.4244	6.08788	6.25422	0.979362	0.978674	1.00156	1.04041	0.992623	0.912973	1.01854	0.986135	1.05794	0.983503	1.00352	1.01908	0.996075	1.01818	1.02721	0.973403	-0.0300859	-0.0310991	0.00224618	0.0571459	-0.0106816	-0.131356	0.0265075	-0.020143	0.0812546	-0.0239984	0.005074	0.0272728	-0.00567306
P48047	ATP5PO	ATP synthase subunit O, mitochondrial	34	6.19575	6.20441	6.1579	6.16038	6.53496	6.42343	6.09345	6.33206	6.12218	6.41832	6.19213	6.14351	6.34268	6.3121	6.26482	6.10191	6.17961	1.00261	1.00401	0.996487	0.996888	1.0575	1.03946	0.986057	1.02467	0.990707	1.03863	1.00203	0.994158	1.02639	1.02144	1.01379	0.987426	0.00376314	0.00577823	-0.00507735	-0.00449645	0.0806626	0.0558281	-0.0202565	0.0351591	-0.0134703	0.0546799	0.00291997	-0.00845264	0.0375768
Q13492	PICALM	Phosphatidylinositol-binding clathrin assembly protein	34	6.05875	6.02721	6.39417	6.21233	6.27987	6.03861	6.40746	6.13304	6.46937	6.40251	6.41585	6.21539	6.36693	6.18253	6.21517	6.1808	6.17311	0.981474	0.976364	1.03581	1.00635	1.01729	0.978211	1.03796	0.993508	1.04799	1.03716	1.03932	1.00685	1.0314	1.00153	1.00681	1.00124	-0.0269785	-0.0345083	0.0507584	0.0091358	0.024736	-0.0317822	0.0537539	-0.00939631	0.0676266	0.0526389	0.0556417	0.00984625	0.0445992
P62280	RPS11	40S ribosomal protein S11	34	6.24155	6.12196	6.26442	6.41304	6.29834	6.12937	6.32408	6.27325	6.3013	6.34747	6.3609	6.23933	6.048	6.44873	6.07735	6.11092	6.26024	0.997014	0.977911	1.00067	1.02441	1.00609	0.979095	1.0102	1.00208	1.00656	1.01393	1.01608	0.996659	0.966097	1.03011	0.970785	0.976147	-0.0043142	-0.0322249	0.000962399	0.0347899	0.0087531	-0.0304797	0.0146371	0.00299451	0.00943095	0.0199631	0.0230124	-0.00482743	-0.0497604
Q13228-4	SELENBP1	Isoform 4 of Methanethiol oxidase	34	6.41531	6.38371	6.42444	6.13001	6.23063	5.83043	6.52243	6.18079	6.12229	6.15452	6.49003	6.24487	6.1771	6.05249	6.16466	6.47628	6.33837	1.01214	1.00715	1.01358	0.967128	0.983002	0.919863	1.02904	0.975139	0.96591	0.970995	1.02393	0.985249	0.974557	0.954897	0.972594	1.02176	0.0174077	0.0102838	0.0194594	-0.0482219	-0.0247333	-0.120509	0.0412982	-0.0363201	-0.0500399	-0.042465	0.0341138	-0.0214398	-0.0371816
Q5JRX3-2	PITRM1	Isoform 2 of Presequence protease, mitochondrial	34	6.31873	6.11535	6.21372	6.62347	6.20337	5.91444	6.25237	6.50322	6.22556	6.05732	6.21844	6.22525	6.37075	6.19115	6.0714	6.49545	6.31782	1.00014	0.967953	0.983523	1.04838	0.981885	0.936152	0.989641	1.02935	0.985397	0.958768	0.98427	0.985348	1.00838	0.979951	0.960996	1.02812	0.000208357	-0.0469912	-0.023969	0.068161	-0.0263741	-0.0951847	-0.0150231	0.041728	-0.0212226	-0.0607466	-0.0228736	-0.0212945	0.012037
P62277	RPS13	40S ribosomal protein S13	34	6.28007	6.28213	6.08658	6.77211	6.2644	6.17899	6.04524	6.37846	5.84175	5.99965	6.30145	6.05558	6.39172	6.11246	6.60452	6.4049	6.35522	0.988175	0.988499	0.957729	1.0656	0.985709	0.97227	0.951224	1.00366	0.919205	0.94405	0.991539	0.952851	1.00574	0.961801	1.03923	1.00782	-0.017162	-0.0166888	-0.0623108	0.0916628	-0.0207663	-0.0405716	-0.072143	0.00526551	-0.121542	-0.0830643	-0.0122588	-0.0696775	0.00826157
Q9H3U1	UNC45A	Protein unc-45 homolog A	33	6.49271	6.36549	6.24997	6.79234	6.2429	6.17026	6.00005	6.35381	5.87619	6.10149	6.26172	6.02555	6.2029	5.93291	6.40201	6.52969	6.47513	1.00272	0.983068	0.965227	1.04899	0.964135	0.952917	0.92663	0.981264	0.907502	0.942297	0.967042	0.930569	0.957958	0.916261	0.988708	1.00843	0.00391217	-0.024637	-0.0510593	0.0690001	-0.0526922	-0.0695773	-0.109934	-0.0272867	-0.140028	-0.085747	-0.0483496	-0.103816	-0.0619657
Q99575	POP1	Ribonucleases P/MRP protein subunit POP1	33	6.18772	6.42903	6.41956	6.00233	6.13718	6.23067	6.23813	6.35146	6.21627	6.39054	6.23822	6.27534	6.04107	6.43653	6.19489	6.21107	6.25966	0.988507	1.02706	1.02554	0.958891	0.980433	0.995369	0.996561	1.01467	0.993068	1.02091	0.996575	1.0025	0.96508	1.02826	0.989653	0.992238	-0.0166764	0.0385168	0.0363901	-0.0605617	-0.0285084	-0.00669699	-0.00497068	0.021004	-0.0100351	0.0298535	-0.00494987	0.00360933	-0.0512802
P31946	YWHAB	14-3-3 protein beta/alpha	33	5.93364	6.02524	5.92871	6.37987	6.33953	8.12782	6.06972	5.85048	6.03566	6.61138	6.10746	5.87411	5.82044	6.06872	6.79475	6.03247	6.06686	0.978041	0.993139	0.977228	1.05159	1.04494	1.33971	1.00047	0.964333	0.994856	1.08975	1.00669	0.968228	0.959382	1.00031	1.11998	0.994331	-0.0320338	-0.0099325	-0.033233	0.0725758	0.0634247	0.421917	0.000678757	-0.0523962	-0.00743967	0.124	0.0096213	-0.0465809	-0.059823
Q9Y5B9	SUPT16H	FACT complex subunit SPT16	33	6.4379	6.18788	6.34586	6.42934	6.34913	5.44617	6.38236	6.25306	6.42957	6.00721	6.47891	6.33789	6.19754	6.18773	6.10922	6.42024	6.35025	1.0138	0.974432	0.999309	1.01246	0.999824	0.857631	1.00506	0.984696	1.01249	0.945981	1.02026	0.998054	0.975953	0.974408	0.962045	1.01102	0.0197779	-0.037367	-0.00099656	0.0178584	-0.000253336	-0.22157	0.00727773	-0.0222499	0.01791	-0.0801172	0.0289389	-0.00280963	-0.0351166
P54136	RARS	Arginine--tRNA ligase, cytoplasmic	33	6.26678	6.14663	6.22875	6.71077	6.29028	6.25985	6.03532	6.33326	6.27362	5.98358	6.03428	5.90903	6.32891	6.11432	6.57668	6.50792	6.33823	0.988727	0.96977	0.982727	1.05878	0.992434	0.987633	0.952209	0.999215	0.989806	0.944046	0.952045	0.932284	0.998529	0.964673	1.03762	1.02677	-0.0163562	-0.0442849	-0.0251379	0.0823977	-0.0109563	-0.0179525	-0.0706503	-0.00113227	-0.0147824	-0.0830717	-0.0708989	-0.101159	-0.00212353
Q13464	ROCK1	Rho-associated protein kinase 1	33	6.10332	6.14976	6.20843	6.01005	6.08981	5.84285	6.21191	6.11844	6.40847	6.24199	6.14937	6.21916	6.74891	6.63385	6.35046	6.51322	6.11789	0.997618	1.00521	1.0148	0.982373	0.99541	0.955043	1.01537	1.00009	1.0475	1.02028	1.00515	1.01655	1.10314	1.08434	1.03801	1.06462	-0.00343993	0.00749594	0.0211943	-0.0256572	-0.00663695	-0.0663619	0.0220028	0.000129693	0.0669458	0.0289719	0.00740445	0.0236856	0.14162
P30740	SERPINB1	Leukocyte elastase inhibitor	33	6.30417	6.29788	6.26305	5.88465	6.2662	6.23344	6.49436	6.13399	6.38262	6.29083	6.21051	6.29184	6.45171	6.35644	5.97364	6.16466	6.18744	1.01887	1.01785	1.01222	0.951064	1.01273	1.00743	1.0496	0.991362	1.03154	1.01671	1.00373	1.01687	1.04271	1.02731	0.965447	0.996319	0.0269644	0.0255242	0.0175233	-0.0723854	0.0182488	0.0106865	0.0698453	-0.0125162	0.0448067	0.0239083	0.0053697	0.0241399	0.0603395
Q9H4M9	EHD1	EH domain-containing protein 1	33	6.09656	6.09944	6.33826	6.20869	6.36562	6.71199	6.06422	6.35153	6.24787	6.39991	6.07881	5.96118	6.41137	6.17539	6.32121	6.16794	6.18574	0.985583	0.986049	1.02466	1.00371	1.02908	1.08508	0.980355	1.0268	1.01004	1.03462	0.982714	0.963698	1.03648	0.998327	1.0219	0.997123	-0.0209502	-0.0202688	0.0351412	0.00534329	0.0413554	0.117795	-0.0286235	0.0381585	0.0144188	0.049106	-0.0251567	-0.0533477	0.0516871
Q16181	SEPTIN7	Septin-7	33	6.19273	6.19327	6.24739	6.25482	6.40174	6.39959	6.04448	6.23341	6.36839	6.25983	6.25328	6.30683	6.08851	6.06026	6.47907	6.21638	6.22205	0.995287	0.995374	1.00407	1.00527	1.02888	1.02853	0.971461	1.00183	1.02352	1.00607	1.00502	1.01363	0.978537	0.973997	1.04131	0.999088	-0.00681502	-0.00668923	0.00586303	0.0075778	0.0410735	0.0405889	-0.0417723	0.00263104	0.0335381	0.00873291	0.00722255	0.0195245	-0.0313014
[truncated: 6,155 more rows]
[truncated: 3 more columns]

## Sheet: pbFDR
				TMT SSN scaled to 100 - log2 transformed																100 nM AZD-7762			1 µM AZD-7762			10 µM AZD-7762
[truncated: 7,011 more rows]
