# Supplementary material for: Large-scale characterization of drug mechanism of action using proteome-wide thermal shift assays
Source: bioRxiv preprint, doi:10.1101/2024.01.26.577428, version 4 (2024-08-14)
Supplement: Figure 5 - source data 4 [file 577428_file18.xlsx]

## Sheet: Legend
This table contains proteomic data for K562 cells treated with 1 µM AZD-7762, 10 µM AZD-7762, 1 µM bafetinib, or 10 µM bafetinib
Full dataset
ProteinID
GeneSymbol
Description
Peptides	Number of quantified peptides
DMSO_1_1_126	TMT SSN scaled to 100
DMSO_1_2_127n	TMT SSN scaled to 100
DMSO_1_3_127c	TMT SSN scaled to 100
AZD-7762_1_1_128n	TMT SSN scaled to 100
AZD-7762_1_2_128c	TMT SSN scaled to 100
AZD-7762_1_3_129n	TMT SSN scaled to 100
bafetinib_1_1_129c	TMT SSN scaled to 100
bafetinib_1_2_130n	TMT SSN scaled to 100
bafetinib_1_3_130c	TMT SSN scaled to 100
DMSO_10_1_131	TMT SSN scaled to 100
DMSO_10_2_131c	TMT SSN scaled to 100
DMSO_10_3_132n	TMT SSN scaled to 100
AZD-7762_10_1_132c	TMT SSN scaled to 100
AZD-7762_10_2_133n	TMT SSN scaled to 100
AZD-7762_10_3_133c	TMT SSN scaled to 100
bafetinib_10_1_134n	TMT SSN scaled to 100
bafetinib_10_2_134c	TMT SSN scaled to 100
bafetinib_10_3_135	TMT SSN scaled to 100

## Sheet: Full dataset
				Summed S/N, Column Normalized, Scaled to 100 per Protein
ProteinID	GeneSymbol	Description	Peptides	DMSO_1_1_126	DMSO_1_2_127n	DMSO_1_3_127c	AZD-7762_1_1_128n	AZD-7762_1_2_128c	AZD-7762_1_3_129n	bafetinib_1_1_129c	bafetinib_1_2_130n	bafetinib_1_3_130c	DMSO_10_1_131	DMSO_10_2_131c	DMSO_10_3_132n	AZD-7762_10_1_132c	AZD-7762_10_2_133n	AZD-7762_10_3_133c	bafetinib_10_1_134n	bafetinib_10_2_134c	bafetinib_10_3_135
P07900-2	HSP90AA1	Isoform 2 of Heat shock protein HSP 90-alpha	41	5.68892	5.47511	5.57353	5.57933	5.62018	5.5144	5.53772	5.61419	5.49717	5.44675	5.57733	5.42913	5.58285	5.74502	5.47914	5.44606	5.56132	5.63185
P68363	TUBA1B	Tubulin alpha-1B chain	35	5.41419	5.52399	5.58066	5.49395	5.62197	5.60598	5.48091	5.55643	5.63477	5.46238	5.62503	5.52384	5.53208	5.58357	5.57134	5.56664	5.51296	5.70933
Q9UPN3	MACF1	Microtubule-actin cross-linking factor 1, isoforms 1/2/3/5	33	5.54711	5.5327	5.58977	5.64747	5.55765	5.61212	5.43135	5.65698	5.5936	5.53528	5.40761	5.58211	5.49002	5.69425	5.49882	5.63919	5.42904	5.55495
O14980	XPO1	Exportin-1	29	5.50974	5.46116	5.51987	5.59312	5.49754	5.47379	5.64355	5.60768	5.63922	5.59972	5.61849	5.50221	5.51192	5.51825	5.58096	5.54524	5.58445	5.5931
P11142	HSPA8	Heat shock cognate 71 kDa protein	25	5.39908	5.40036	5.61947	5.742	5.4416	5.6956	5.53384	5.54485	5.5266	5.50932	5.61677	5.67008	5.5048	5.69992	5.47887	5.47844	5.49745	5.64093
Q14980	NUMA1	Nuclear mitotic apparatus protein 1	25	5.81539	5.51573	5.4928	5.33016	5.5793	5.50326	5.58299	5.51834	5.74358	5.55193	5.61125	5.44676	5.56529	5.44432	5.73842	5.46262	5.62293	5.47493
Q05639	EEF1A2	Elongation factor 1-alpha 2	25	5.56287	5.50017	5.37499	5.45314	5.72582	5.61955	5.46448	5.522	5.49787	5.52937	5.62773	5.61431	5.61194	5.59418	5.63717	5.64316	5.54615	5.47508
P06733	ENO1	Alpha-enolase	24	5.78293	6.18726	5.57367	5.5694	5.62399	5.57388	5.55932	5.70568	5.32217	5.5054	5.23746	5.38799	5.55564	5.68195	5.39384	5.64972	5.23346	5.45625
Q00610	CLTC	Clathrin heavy chain 1	22	5.36653	5.40673	5.73763	5.46774	5.28432	5.49097	5.51882	5.55961	5.55263	5.39868	5.5669	5.60218	5.7096	5.36091	5.7551	5.68238	5.72267	5.81662
P35658-3	NUP214	Isoform 3 of Nuclear pore complex protein Nup214	22	5.63914	5.39991	5.61716	5.57406	5.47329	5.56959	5.64054	5.59061	5.71664	5.48046	5.59532	5.49515	5.43512	5.44182	5.49468	5.6577	5.54963	5.62918
P10809	HSPD1	60 kDa heat shock protein, mitochondrial	22	5.50594	5.53778	5.66415	5.74666	5.58572	5.44999	5.48209	5.45716	5.27447	5.4571	5.55517	5.40185	5.45142	6.20926	5.63135	5.55731	5.44956	5.58301
P21333	FLNA	Filamin-A	22	5.57542	5.5707	5.60236	5.68894	5.37149	5.53478	5.62379	5.62358	5.57271	5.45481	5.68632	5.61373	5.48371	5.4132	5.49004	5.4134	5.62708	5.65395
P0DMV9	HSPA1B	Heat shock 70 kDa protein 1B	21	5.54012	5.74121	5.70949	5.63198	5.59393	5.75719	5.49272	5.73877	5.51086	5.46088	5.40267	5.40694	5.3694	5.48109	5.49563	5.57645	5.51295	5.5777
Q14204	DYNC1H1	Cytoplasmic dynein 1 heavy chain 1	21	5.43611	5.50091	5.62562	5.53519	5.69088	5.44038	5.52714	5.3979	5.55692	5.4991	5.60617	5.51803	5.56787	5.42877	5.75768	5.45383	5.78868	5.66882
P22102	GART	Trifunctional purine biosynthetic protein adenosine-3	21	5.80382	5.54558	5.47236	5.64009	5.6359	5.82877	5.43831	5.49895	5.56095	5.62932	5.42957	5.59306	5.33438	5.51881	5.50547	5.44672	5.51034	5.6076
Q15149	PLEC	Plectin	20	5.50091	5.72995	5.62282	5.51339	5.4262	5.28875	5.52364	5.38996	5.64596	5.48711	5.75672	5.46768	5.50842	5.60531	5.64318	5.52144	5.64275	5.72582
P14618	PKM	Pyruvate kinase PKM	20	5.1642	5.61021	5.55141	5.73547	5.35126	5.5275	5.49799	5.43279	5.56691	5.41651	5.55094	5.6362	5.62342	6.11028	5.70057	5.44322	5.31405	5.76706
P00338-3	LDHA	Isoform 3 of L-lactate dehydrogenase A chain	20	5.81947	5.52137	5.51159	5.43723	5.69045	5.54954	5.60309	5.61833	5.6875	5.48879	5.57975	5.47534	5.70321	5.51556	5.51545	5.39038	5.58433	5.30864
Q9Y520-7	PRRC2C	Isoform 7 of Protein PRRC2C	19	5.5276	5.78431	5.30957	5.41509	5.36462	5.52125	5.46527	5.59376	5.43287	5.79173	5.40819	5.64812	5.54456	5.7073	5.47033	5.70114	5.62158	5.69272
P55072	VCP	Transitional endoplasmic reticulum ATPase	19	5.33069	5.90894	5.0759	5.7763	5.55483	5.70557	5.23161	5.97097	5.17824	5.74272	5.19987	5.69412	5.44158	5.85926	5.43944	5.95182	5.12155	5.81659
P08243	ASNS	Asparagine synthetase [glutamine-hydrolyzing]	19	5.64665	5.38187	5.57527	5.34037	5.53894	5.42118	5.56426	5.50261	5.59212	5.59853	5.54402	5.3829	5.61339	5.5921	5.86545	5.53647	5.70953	5.59433
P68104	EEF1A1	Elongation factor 1-alpha 1	19	5.53577	5.2628	5.62488	5.44446	5.69948	5.70553	5.39823	5.33962	5.44061	5.66525	5.62795	5.62805	5.40206	5.45151	5.58946	5.85966	5.77586	5.54879
Q5T4S7-2	UBR4	Isoform 2 of E3 ubiquitin-protein ligase UBR4	18	5.35175	5.41098	5.3963	5.43258	5.47746	5.43895	5.47595	5.46083	5.6287	5.46066	5.38754	5.76559	5.54315	5.75761	5.61186	5.66015	5.79232	5.94764
Q99460	PSMD1	26S proteasome non-ATPase regulatory subunit 1	18	5.85467	4.99636	5.58039	5.43584	5.47979	5.88127	5.6215	5.36295	5.75681	5.58767	5.57684	5.42635	5.52707	5.27628	5.53435	5.64835	5.8157	5.63779
O75369-8	FLNB	Isoform 8 of Filamin-B	18	5.61793	5.7361	5.45566	5.71237	5.54851	5.64092	5.41474	5.75234	5.51044	5.70199	5.3943	5.57376	5.43215	5.53045	5.40809	5.66848	5.29515	5.60664
P42704	LRPPRC	Leucine-rich PPR motif-containing protein, mitochondrial	18	5.40052	5.7154	5.42756	5.68502	5.53812	5.57235	5.31899	5.64117	5.40761	5.58792	5.32036	5.59102	5.51433	5.90043	5.63691	5.7531	5.39539	5.5938
Q14839-2	CHD4	Isoform 2 of Chromodomain-helicase-DNA-binding protein 4	18	5.62418	5.53405	5.4977	5.5151	5.34332	5.66514	5.50766	5.51871	5.63949	5.43807	5.61888	5.77119	5.51151	5.49742	5.50509	5.44123	5.71183	5.65942
O00571	DDX3X	ATP-dependent RNA helicase DDX3X	18	5.55316	5.69782	5.51943	5.45272	5.671	5.53397	5.50299	5.77381	5.48591	5.43246	5.53201	5.42271	5.50196	5.74702	5.59106	5.68229	5.4618	5.43787
A6NHR9	SMCHD1	Structural maintenance of chromosomes flexible hinge domain-containing protein 1	18	5.65886	5.5899	5.40609	5.66931	5.58895	5.73997	5.50095	5.7464	5.60238	5.5472	5.34071	5.34925	5.63803	5.52957	5.45744	5.62855	5.64497	5.36148
P12814-4	ACTN1	Isoform 4 of Alpha-actinin-1	17	6.01515	5.4272	5.52638	5.53553	5.81411	5.27498	5.50287	5.41792	5.65079	5.35661	5.69007	5.59084	5.6063	5.30893	5.60754	5.39013	5.92752	5.35712
P14625	HSP90B1	Endoplasmin	17	5.3507	5.49047	5.58659	5.64051	5.51746	5.51428	5.49573	5.69889	5.6045	5.37883	5.32974	5.51717	5.55723	5.41408	5.69928	5.67326	5.76203	5.76927
P09211	GSTP1	Glutathione S-transferase P	17	5.60366	5.31914	5.35785	5.4639	5.79088	5.64502	5.58549	5.55618	5.67909	5.47122	5.5661	5.63749	5.63429	5.61919	5.48573	5.48804	5.5224	5.57435
P50990	CCT8	T-complex protein 1 subunit theta	17	5.38094	5.13556	5.67619	5.54814	5.45878	5.57046	5.60499	5.42879	5.78772	5.51447	5.55059	5.58876	5.68847	5.58172	5.59441	5.60878	5.60534	5.67591
Q13509	TUBB3	Tubulin beta-3 chain	17	5.63729	5.52644	5.61611	5.60484	5.59652	5.60865	5.72306	5.46974	5.61851	5.5535	5.53885	5.46815	5.65722	5.68917	5.61591	5.32598	5.51907	5.23098
A5YKK6	CNOT1	CCR4-NOT transcription complex subunit 1	17	5.6196	5.65899	5.56998	5.66495	5.57007	5.70411	5.34818	5.73076	5.32997	5.68038	5.5114	5.52387	5.38401	5.67178	5.42393	5.54484	5.44159	5.62158
Q99798	ACO2	Aconitate hydratase, mitochondrial	17	5.68692	5.67341	5.59717	5.46165	5.63843	5.76942	5.60307	5.54492	5.6717	5.42519	5.52958	5.36739	5.59403	5.53291	5.51147	5.51571	5.43499	5.44203
P56192	MARS1	Methionine--tRNA ligase, cytoplasmic	16	5.65537	5.44046	5.47427	5.42133	5.59422	5.61975	5.39884	5.77086	5.61749	5.47594	5.39519	5.45088	5.69847	5.61618	5.49127	5.64059	5.64917	5.58972
O43707	ACTN4	Alpha-actinin-4	16	5.55992	5.53869	5.56801	5.49474	5.58834	5.75533	5.38121	5.7262	5.51146	5.50022	5.58077	5.53623	5.42287	5.64428	5.45847	5.68106	5.45875	5.59346
Q12931	TRAP1	Heat shock protein 75 kDa, mitochondrial	16	5.51997	5.75777	5.59384	5.6969	5.56351	5.49994	5.42745	5.5477	5.58713	5.65937	5.5284	5.3167	5.52824	5.50563	5.39895	5.59253	5.55985	5.71613
P14868	DARS1	Aspartate--tRNA ligase, cytoplasmic	16	5.50556	5.47744	5.46376	5.53248	5.56594	5.64768	5.55481	5.6842	5.59865	5.64883	5.51825	5.57812	5.48971	5.45076	5.39837	5.5355	5.73964	5.61029
P50851	LRBA	Lipopolysaccharide-responsive and beige-like anchor protein	16	5.60969	5.16323	5.58115	5.57496	5.80703	5.66132	5.58118	5.70387	5.64751	5.44798	5.5546	5.48615	5.62167	5.29416	5.58256	5.58073	5.62443	5.47779
P51532-4	SMARCA4	Isoform 4 of Transcription activator BRG1	16	5.49499	5.69325	5.5179	5.58977	5.57835	5.62948	5.36304	5.7632	5.36267	5.56644	5.42986	5.56064	5.49734	5.86343	5.52512	5.69361	5.23766	5.63324
P02545	LMNA	Prelamin-A/C	16	5.6666	5.6064	5.60704	5.40619	5.60858	5.52091	5.66996	5.75605	5.56697	5.3712	5.46036	5.38723	5.57225	5.61087	5.56479	5.64575	5.50021	5.47862
Q13616	CUL1	Cullin-1	16	5.73674	5.48926	5.48995	5.64123	5.4738	5.51418	5.48182	5.77305	5.61258	5.38262	5.61509	5.74243	5.55278	5.41499	5.44071	5.47604	5.71691	5.44582
O95433	AHSA1	Activator of 90 kDa heat shock protein ATPase homolog 1	16	5.66687	5.40578	5.56668	5.56782	5.70268	5.64227	5.70486	5.62982	5.688	5.53708	5.4718	5.37628	5.54676	5.4775	5.43921	5.28187	5.6544	5.64033
P06744-2	GPI	Isoform 2 of Glucose-6-phosphate isomerase	16	5.60725	5.58474	5.50222	5.63191	5.43732	5.56983	5.53157	5.7642	5.44322	5.54077	5.46018	5.61514	5.51668	5.77573	5.52027	5.53054	5.26847	5.69996
Q14978-3	NOLC1	Isoform 3 of Nucleolar and coiled-body phosphoprotein 1	15	5.32577	5.46302	5.61576	5.51785	5.31858	5.40054	5.47616	5.50055	5.45457	5.60306	5.67783	5.64548	5.49733	5.31382	5.79142	5.72594	5.79803	5.87429
P49792	RANBP2	E3 SUMO-protein ligase RanBP2	15	5.48446	5.78721	5.87238	5.86132	5.72774	5.68002	5.37642	5.58813	5.66633	5.64679	5.45081	5.44959	5.36266	5.58592	5.37413	5.3127	5.21717	5.55621
Q92974	ARHGEF2	Rho guanine nucleotide exchange factor 2	15	5.70239	5.48081	5.5832	5.45499	5.52932	5.4318	5.49286	5.72614	5.75069	5.42892	5.47055	5.47406	5.53947	5.515	5.52508	5.57087	5.66877	5.65508
Q5VYK3	ECPAS	Proteasome adapter and scaffold protein ECM29	15	5.63492	5.60373	5.61285	5.59836	5.64528	5.50503	5.45436	5.55743	5.67998	5.63753	5.46889	5.40497	5.56874	5.44159	5.49376	5.54697	5.60981	5.53582
Q15393	SF3B3	Splicing factor 3B subunit 3	15	5.56764	5.50554	5.68258	5.55268	5.70089	5.74831	5.609	5.67066	5.49353	5.5429	5.40283	5.4489	5.54057	5.46612	5.58089	5.56412	5.45015	5.4727
Q13310-3	PABPC4	Isoform 3 of Polyadenylate-binding protein 4	15	5.28305	5.90841	6.0197	5.65335	5.97841	5.20355	5.26175	5.44485	5.24736	5.43586	5.2618	5.43958	5.49222	6.69895	5.68735	5.44044	5.19874	5.34464
P55884-2	EIF3B	Isoform 2 of Eukaryotic translation initiation factor 3 subunit B	15	5.69482	5.57189	5.53115	5.41579	5.91341	5.3408	5.67776	5.58153	5.62375	5.42352	5.67644	5.36643	5.65894	5.35934	5.48715	5.42394	5.76108	5.49226
P38646	HSPA9	Stress-70 protein, mitochondrial	15	5.54139	5.50732	5.58313	5.73811	5.28528	5.54746	5.52419	5.55818	5.51056	5.60072	5.49005	5.68908	5.48909	5.52933	5.59836	5.57651	5.54152	5.68973
O95714	HERC2	E3 ubiquitin-protein ligase HERC2	15	5.63863	5.47159	5.43962	5.65376	5.64336	5.49135	5.47077	5.55622	5.60428	5.41221	5.60134	5.51984	5.53679	5.5544	5.48167	5.43562	5.77951	5.70903
P55196-5	AFDN	Isoform 5 of Afadin	15	5.6181	5.54942	5.58744	5.47642	5.63728	5.54004	5.60966	5.65636	5.62539	5.57072	5.61352	5.66103	5.30215	5.28683	5.45197	5.62584	5.5405	5.64735
Q99996-6	AKAP9	Isoform 6 of A-kinase anchor protein 9	15	5.4718	5.33846	5.58881	5.73172	5.53728	5.55988	5.54099	5.52884	5.5042	5.46864	5.53494	5.65829	5.52035	5.5911	5.62896	5.67884	5.64792	5.46901
Q02880	TOP2B	DNA topoisomerase 2-beta	14	5.56238	5.75563	5.56745	5.65169	5.62888	5.72561	5.69097	5.57041	5.54672	5.83699	5.64135	5.13527	5.42351	5.21528	5.42835	5.4995	5.65512	5.46488
P31948-2	STIP1	Isoform 2 of Stress-induced-phosphoprotein 1	14	5.79541	5.79852	5.5564	5.51597	5.63494	5.67796	5.58869	5.57049	5.50345	5.44171	5.41081	5.41868	5.62435	5.64068	5.55008	5.5502	5.41225	5.30942
P19338	NCL	Nucleolin	14	5.64482	5.55898	5.53376	5.51332	5.5143	5.53782	5.52343	5.66256	5.46977	5.58564	5.55448	5.41771	5.56308	5.50856	5.5825	5.50605	5.72665	5.59658
Q8N163	CCAR2	Cell cycle and apoptosis regulator protein 2	14	5.59098	5.37882	5.50495	5.60053	5.68774	5.41832	5.51566	5.45829	5.43301	5.53748	5.52159	5.64381	5.44296	5.59486	5.54988	5.63298	5.58531	5.90283
Q14676	MDC1	Mediator of DNA damage checkpoint protein 1	14	6.05833	6.54866	5.45938	5.4809	5.2702	5.39138	5.47212	5.40675	5.39327	6.32228	5.48063	5.48649	5.29067	5.25145	5.42119	5.40085	5.5514	5.31405
P20700	LMNB1	Lamin-B1	14	5.51912	5.75239	5.36967	5.50175	5.59954	5.66197	5.46176	5.9668	5.39431	5.49045	5.28981	5.42947	5.63394	5.74425	5.55976	5.72233	5.4405	5.46218
P41250	GARS1	Glycine--tRNA ligase	14	5.50911	5.14315	5.5735	5.72078	5.48271	5.41024	5.64459	5.49405	5.54502	5.44579	5.60781	5.52667	5.60004	5.45385	5.68631	5.62079	5.69151	5.84409
Q14008	CKAP5	Cytoskeleton-associated protein 5	14	5.41129	5.47941	5.59743	5.64318	5.55255	5.48257	5.47478	5.66348	5.47966	5.52887	5.63032	5.52687	5.53185	5.57533	5.59071	5.57058	5.4824	5.77872
O60506	SYNCRIP	Heterogeneous nuclear ribonucleoprotein Q	14	6.0255	5.35426	5.58105	5.40246	5.84352	5.31763	5.9085	5.41927	5.85075	5.28866	5.68965	5.15506	5.6651	5.3717	5.74492	5.19173	5.8202	5.37002
O43390-2	HNRNPR	Isoform 2 of Heterogeneous nuclear ribonucleoprotein R	14	5.69168	5.84212	5.45307	5.66995	5.39268	5.61822	5.51182	5.74311	5.46316	5.67463	5.35343	5.63685	5.33126	5.60724	5.45185	5.59948	5.57241	5.38705
P06576	ATP5F1B	ATP synthase subunit beta, mitochondrial	14	5.48925	5.42049	5.49224	5.60086	5.32438	5.36755	5.65448	5.50578	6.53052	5.57337	5.66211	5.59515	5.68307	5.3942	5.28501	5.16083	5.72175	5.53895
Q14966	ZNF638	Zinc finger protein 638	14	5.6446	5.90463	5.46906	5.36037	5.433	5.37682	5.53732	5.44293	5.69793	5.98903	5.79947	5.48979	5.46322	5.3572	5.61016	5.32403	5.5827	5.51776
Q01813	PFKP	ATP-dependent 6-phosphofructokinase, platelet type	14	5.39653	5.66376	5.54418	5.56227	5.71841	5.37836	5.30615	5.42656	5.62252	5.54471	5.83789	5.59801	5.5733	5.71164	5.71786	5.29967	5.65716	5.44104
P11171	EPB41	Protein 4.1	14	5.57353	5.53688	5.57464	5.52995	5.58456	5.51189	5.70468	5.78083	5.61974	5.48236	5.53506	5.5156	5.34735	5.2525	5.36126	5.59186	5.80363	5.69368
P17987	TCP1	T-complex protein 1 subunit alpha	14	5.47692	5.4768	5.46499	5.65349	5.49192	5.65411	5.7789	5.553	5.40188	5.51913	5.62559	5.53313	5.52632	5.55238	5.50431	5.4132	5.74525	5.62871
Q13200	PSMD2	26S proteasome non-ATPase regulatory subunit 2	14	5.75991	5.58983	5.74439	5.59005	5.64073	5.39482	5.54207	5.7472	5.61451	5.48099	5.62583	5.39581	5.62173	5.32368	5.62618	5.41122	5.46369	5.42737
P16157-14	ANK1	Isoform Er13 of Ankyrin-1	14	5.69815	5.64799	5.44365	5.74578	5.68908	5.64236	5.47453	5.66053	5.56259	5.60508	5.34739	5.55662	5.56227	5.54953	5.47522	5.53994	5.34637	5.4529
P07195	LDHB	L-lactate dehydrogenase B chain	14	5.68739	5.58586	5.48192	5.58388	5.60449	5.5735	5.58205	5.59421	5.55142	5.40532	5.57916	5.45746	5.48923	5.40593	5.66307	5.61124	5.67546	5.46843
P05141	SLC25A5	ADP/ATP translocase 2	14	5.44332	5.54598	5.36235	5.63359	5.37773	5.6161	5.34917	5.71902	5.46763	5.62369	5.55585	5.71445	5.45753	5.59774	5.47141	5.72329	5.71866	5.6225
P60842	EIF4A1	Eukaryotic initiation factor 4A-I	14	5.74113	5.77319	5.34403	5.2718	5.51415	5.66944	5.55373	5.71353	5.60275	5.50058	5.37609	5.49061	5.72368	5.73192	5.65479	5.38738	5.55978	5.39143
Q9P2J5	LARS1	Leucine--tRNA ligase, cytoplasmic	14	5.52252	5.62186	5.42292	5.69338	5.55648	5.40847	5.53226	5.6497	5.55664	5.65056	5.52581	5.5377	5.59667	5.62009	5.64545	5.66908	5.40755	5.38286
P47897	QARS1	Glutamine--tRNA ligase	14	5.37483	5.41373	5.70818	5.63762	5.54786	5.35298	5.47822	5.50043	5.50583	5.55246	5.79573	5.7569	5.55126	5.59419	5.48378	5.55043	5.49924	5.69632
P17844	DDX5	Probable ATP-dependent RNA helicase DDX5	14	5.29247	5.37048	5.39514	5.35955	5.58372	5.54393	5.64936	5.66662	5.69789	5.56182	5.6572	5.50318	5.72927	5.59499	5.61503	5.61689	5.5786	5.58387
Q9NU22	MDN1	Midasin	13	5.72133	5.91585	5.95129	6.06586	5.90141	5.82674	5.64593	5.2854	5.88983	5.32721	5.48372	5.18237	5.31206	5.16594	5.44856	5.24508	5.44004	5.19139
Q92499	DDX1	ATP-dependent RNA helicase DDX1	13	5.41321	5.96882	5.20605	5.46905	5.49953	5.70945	5.6361	5.50089	5.47748	5.62644	5.51405	5.89423	5.75954	5.80242	5.32814	5.77917	5.26232	5.15312
O75643	SNRNP200	U5 small nuclear ribonucleoprotein 200 kDa helicase	13	5.83077	5.45256	5.53982	5.65239	5.64759	5.53517	5.45429	5.67895	5.54748	5.55856	5.4279	5.41159	5.54315	5.39066	5.52549	5.63276	5.64393	5.52694
P05023-4	ATP1A1	Isoform 4 of Sodium/potassium-transporting ATPase subunit alpha-1	13	5.48546	5.57402	5.47991	5.526	5.5369	5.5654	5.58123	5.79192	5.62433	5.67293	5.53424	5.58185	5.25278	5.4666	5.54274	5.60317	5.65948	5.521
Q9Y6G9	DYNC1LI1	Cytoplasmic dynein 1 light intermediate chain 1	13	5.48544	5.61362	5.757	5.6476	5.75652	5.70415	5.49448	5.51248	5.35733	5.51271	5.47566	5.53928	5.46834	5.39935	5.64134	5.49881	5.57374	5.56215
P27824-2	CANX	Isoform 2 of Calnexin	13	5.31553	5.29396	5.63292	5.43919	5.39997	5.63183	5.50121	5.65331	5.66879	5.60924	5.57139	5.59817	5.54997	5.60929	5.65914	5.51801	5.67363	5.67444
P31939	ATIC	Bifunctional purine biosynthesis protein ATIC	13	5.50256	5.55899	5.552	5.65138	5.7624	5.82207	5.55504	5.71907	5.58728	5.67813	5.35041	5.5893	5.48664	5.68464	5.51332	5.53267	5.26408	5.19001
Q9NTK5	OLA1	Obg-like ATPase 1	13	5.58102	5.87141	5.274	5.69094	5.39361	5.81527	5.27563	6.00703	5.38909	5.55629	5.15606	5.66715	5.52863	5.73057	5.40977	5.73132	5.30822	5.614
P23396-2	RPS3	Isoform 2 of 40S ribosomal protein S3	13	5.9128	5.43201	5.58886	5.34051	5.62778	5.62478	5.40245	5.45635	5.63155	5.32309	5.70346	5.33978	5.72257	5.44271	5.75637	5.60237	5.72912	5.36344
P41252	IARS1	Isoleucine--tRNA ligase, cytoplasmic	13	5.24382	5.60319	5.62278	5.50291	5.3279	5.44632	5.5083	5.56459	5.7351	5.6159	5.65241	5.58055	5.47027	5.48828	5.55806	5.53189	5.68552	5.86219
Q99661	KIF2C	Kinesin-like protein KIF2C	13	5.45543	5.461	5.63452	5.4243	5.33144	5.5371	5.69511	5.60868	5.62965	5.58659	5.66927	5.44613	5.5644	5.41717	5.5878	5.64771	5.73481	5.56892
Q00341	HDLBP	Vigilin	13	5.38942	5.53466	5.51661	5.53148	5.39251	5.49388	5.59882	5.49914	5.59991	5.45671	5.614	5.58801	5.51517	5.936	5.6504	5.46135	5.61594	5.60597
P78527	PRKDC	DNA-dependent protein kinase catalytic subunit	13	5.19292	5.52411	5.61658	5.62187	5.59804	5.43022	5.624	5.58369	5.61707	5.52525	5.73681	5.53888	5.64182	5.68846	5.48421	5.47037	5.64134	5.46436
Q14789-2	GOLGB1	Isoform 2 of Golgin subfamily B member 1	13	5.51441	5.46357	5.52669	5.76794	5.3677	5.53772	5.75537	5.54559	5.52258	5.46692	5.31462	5.50383	5.668	5.58085	5.71412	5.52393	5.5483	5.67785
Q9NY33	DPP3	Dipeptidyl peptidase 3	13	5.77314	5.72692	5.44539	5.45705	5.38673	5.37868	5.64494	5.66784	5.4453	5.61512	5.76668	5.37083	5.51156	5.56943	5.57681	5.44578	5.64981	5.568
Q8IY67-2	RAVER1	Isoform 2 of Ribonucleoprotein PTB-binding 1	13	5.50792	5.52165	5.57816	5.45311	5.57186	5.51313	5.58288	5.44682	5.71308	5.62626	5.67207	5.54004	5.52483	5.52759	5.69754	5.41917	5.5164	5.58749
P52701	MSH6	DNA mismatch repair protein Msh6	13	5.66948	5.17074	5.68245	5.53966	5.54338	5.62099	5.64121	5.50311	5.46894	5.7454	5.64542	5.57296	5.67363	5.5153	5.39242	5.52734	5.60657	5.481
Q969Z0	TBRG4	FAST kinase domain-containing protein 4	13	5.90575	5.26263	5.63693	5.6094	5.56812	5.22554	5.63978	5.40921	5.72647	5.32814	5.61155	5.6614	5.41755	5.50794	5.43827	5.27147	6.08162	5.69824
Q9Y678	COPG1	Coatomer subunit gamma-1	13	5.64648	5.56632	5.49533	5.65548	5.49585	5.63399	5.52445	5.59649	5.62228	5.55344	5.34815	5.60337	5.42068	5.55191	5.58364	5.66074	5.42017	5.62124
Q92538	GBF1	Golgi-specific brefeldin A-resistance guanine nucleotide exchange factor 1	13	5.74517	5.39159	5.70228	5.44698	5.47575	5.5406	5.54317	5.89378	5.42868	5.46836	5.56511	5.41952	5.49628	5.31616	5.68782	5.49419	5.64471	5.73985
P43243	MATR3	Matrin-3	13	6.01972	5.78868	5.5935	5.37874	5.64174	5.45821	5.49423	5.56947	5.74454	5.30019	5.75311	5.48385	5.41726	5.40952	5.47505	5.26789	5.85546	5.34885
P25705	ATP5F1A	ATP synthase subunit alpha, mitochondrial	13	5.56185	5.58871	5.59755	5.4926	5.61625	5.3995	5.78236	5.42738	5.76549	5.40994	5.70931	5.42311	5.62364	5.48542	5.63722	5.35579	5.70853	5.41534
O43491	EPB41L2	Band 4.1-like protein 2	13	5.59985	5.35707	5.84603	5.64219	5.69907	5.50596	5.71358	5.62216	5.72323	5.57632	5.73395	5.57161	5.38998	5.02102	5.42008	5.41003	5.57462	5.59324
P49588-2	AARS1	Isoform 2 of Alanine--tRNA ligase, cytoplasmic	13	5.90276	5.40484	5.81604	5.57155	5.59573	5.45407	5.6834	5.15749	5.77346	5.52463	5.70936	5.49073	5.7765	5.33173	5.79739	5.11396	5.57388	5.32248
P11717	IGF2R	Cation-independent mannose-6-phosphate receptor	13	5.46709	5.52503	5.47086	5.66331	5.50745	5.57486	5.52478	5.57874	5.46557	5.55267	5.56224	5.46861	5.41888	5.70329	5.61263	5.77943	5.42081	5.70377
P05771-2	PRKCB	Isoform Beta-II of Protein kinase C beta type	13	5.78379	5.44618	5.67016	5.58851	5.5373	5.53256	5.72884	5.67585	5.42267	5.459	5.7313	5.53224	5.53986	5.2244	5.44752	5.41284	5.70186	5.56512
Q12906-7	ILF3	Isoform 7 of Interleukin enhancer-binding factor 3	13	5.64242	5.32387	5.54405	5.42016	5.72513	5.58983	5.77662	5.5197	5.78828	5.50816	5.55215	5.38143	5.7074	5.29058	5.67809	5.46793	5.60786	5.47635
Q14974	KPNB1	Importin subunit beta-1	13	5.51483	5.51547	5.60405	5.44018	5.77032	5.4032	5.62814	5.40759	5.57134	5.5221	5.82793	5.40909	5.71059	5.6921	5.80878	5.36822	5.62042	5.18566
O14617-5	AP3D1	Isoform 5 of AP-3 complex subunit delta-1	13	5.51026	5.53364	5.51242	5.5241	5.49861	5.51104	5.6331	5.6853	5.55326	5.78123	5.51338	5.53827	5.5397	5.48027	5.7901	5.53524	5.36764	5.49245
P08758	ANXA5	Annexin A5	13	5.62319	5.68083	5.47495	5.3391	5.50411	6.06132	5.46642	5.63309	5.40887	5.67173	5.48924	5.45368	5.33119	5.44799	5.54001	5.53344	5.72901	5.61183
O00148	DDX39A	ATP-dependent RNA helicase DDX39A	13	5.60545	5.66645	5.59715	5.60124	5.68331	5.71972	5.54728	5.67594	5.50796	5.65202	5.48276	5.37394	5.6039	5.64484	5.5558	5.57853	5.22397	5.27974
E9PAV3	NACA	Nascent polypeptide-associated complex subunit alpha, muscle-specific form	13	5.4082	5.46367	5.46271	5.48369	5.73092	5.51457	5.58065	5.76724	5.64383	5.59746	5.54719	5.39821	5.59442	5.50424	5.62001	5.74069	5.45049	5.49183
P52292	KPNA2	Importin subunit alpha-1	13	5.49252	5.46046	5.60674	5.57074	5.64228	5.57368	5.53648	5.62526	5.68707	5.3925	5.46782	5.4217	5.52626	5.46107	5.64601	5.65593	5.52426	5.70921
Q14694-2	USP10	Isoform 2 of Ubiquitin carboxyl-terminal hydrolase 10	13	5.79717	4.99485	5.40362	5.67926	5.5982	5.71344	5.50207	5.44444	5.59016	5.48903	5.58783	5.43704	5.68415	5.57599	5.45448	5.7049	5.80564	5.53772
P55209	NAP1L1	Nucleosome assembly protein 1-like 1	13	5.37711	5.28373	5.55015	5.45375	5.48629	5.6579	5.62443	5.71057	5.35701	5.41538	5.7724	5.61935	5.29844	5.53468	5.63663	5.5989	5.65956	5.96372
Q04637-9	EIF4G1	Isoform 9 of Eukaryotic translation initiation factor 4 gamma 1	12	5.481	5.44144	5.56287	5.70524	5.38057	5.50838	5.43678	5.54569	5.65124	5.35913	5.56649	5.65218	5.53755	5.74422	5.57115	5.44119	5.58585	5.82904
P35232	PHB	Prohibitin	12	5.93778	5.61963	5.69103	5.71384	5.79569	5.80052	5.62355	5.53666	5.743	5.47118	5.55594	5.37012	5.51574	5.36868	5.50537	5.3321	5.3035	5.11566
P34897	SHMT2	Serine hydroxymethyltransferase, mitochondrial	12	5.3706	5.41154	5.61742	5.47853	5.48693	5.68959	5.46523	5.59025	5.58026	5.532	5.52046	5.62478	5.76739	5.69419	5.48872	5.64043	5.57801	5.46367
P49321	NASP	Nuclear autoantigenic sperm protein	12	5.58723	5.28439	5.60456	5.78578	5.79017	5.53591	5.74148	5.70367	5.62797	5.50248	5.58239	5.50019	5.45343	5.48255	5.54726	5.21482	5.66038	5.39534
Q9Y4E8	USP15	Ubiquitin carboxyl-terminal hydrolase 15	12	5.69817	5.34495	5.62231	5.60248	5.68633	5.41688	5.47445	5.65818	5.76664	5.56033	5.42822	5.4749	5.55465	5.4726	5.36388	5.44536	5.67879	5.75088
Q5JPE7	NOMO2	Nodal modulator 2	12	5.71269	5.40482	5.54865	5.28207	5.77383	5.72573	5.54027	5.54728	5.66532	5.23132	5.77795	5.65832	5.78901	5.31285	5.47943	5.11544	5.97865	5.45637
Q14160-3	SCRIB	Isoform 3 of Protein scribble homolog	12	5.59631	5.59948	5.71732	5.48596	5.76747	5.55983	5.50635	5.76359	5.60088	5.45878	5.58644	5.69771	5.32338	5.33753	5.37502	5.20156	5.51585	5.90655
P55786	NPEPPS	Puromycin-sensitive aminopeptidase	12	5.56804	5.46102	5.71115	5.67807	5.65109	5.56805	5.41494	5.51297	5.61656	5.47097	5.66014	5.67007	5.38237	5.45924	5.59997	5.36271	5.65503	5.55761
Q9UQ80	PA2G4	Proliferation-associated protein 2G4	12	5.49602	5.48867	5.39625	5.42146	5.59668	5.70532	5.36495	5.58281	5.99051	5.54878	5.32214	5.3549	5.73854	5.49271	5.64436	5.80078	5.52321	5.53192
P35580-4	MYH10	Isoform 4 of Myosin-10	12	5.19259	5.50967	5.35142	5.66862	5.54463	5.56127	5.47563	5.72339	5.55258	5.43493	5.56222	5.54135	5.56156	5.78562	5.66578	5.70179	5.32668	5.84026
Q13085-4	ACACA	Isoform 4 of Acetyl-CoA carboxylase 1	12	5.63956	5.64508	5.73655	5.41728	5.40781	5.76055	5.46437	5.67463	5.49326	5.68926	5.48761	5.52541	5.44265	5.51938	5.62842	5.4957	5.5131	5.45936
Q6P2Q9	PRPF8	Pre-mRNA-processing-splicing factor 8	12	5.47036	5.46154	5.41124	5.64209	5.50924	5.28797	5.48836	5.76648	5.66475	5.67253	5.67704	5.45972	5.59336	5.60855	5.58447	5.45529	5.69784	5.54916
O95831	AIFM1	Apoptosis-inducing factor 1, mitochondrial	12	5.53386	5.32771	5.69275	5.62526	5.42042	5.49834	5.58193	5.49072	5.74889	5.27344	5.64427	5.58232	5.51162	5.47979	5.77629	5.4434	5.75198	5.61702
P35241-5	RDX	Isoform 5 of Radixin	12	5.58909	5.44868	5.86511	5.80018	5.74618	5.45258	5.77188	5.57177	5.50747	5.46742	5.42293	5.27389	5.65699	5.69203	5.64141	5.30543	5.25214	5.53485
O15067	PFAS	Phosphoribosylformylglycinamidine synthase	12	5.54825	5.37567	5.53906	5.61093	5.52391	5.4842	5.58694	5.54878	5.75033	5.46715	5.5625	5.54486	5.6779	5.47508	5.513	5.43955	5.74776	5.60414
Q5QNW6-2	H2BC18	Isoform 2 of Histone H2B type 2-F	12	5.40778	5.30527	5.76923	5.66607	5.66758	5.3405	5.59779	5.51717	5.54561	5.57496	5.61174	5.70203	5.42755	5.6551	5.5531	5.44341	5.59612	5.619
Q9NTJ3	SMC4	Structural maintenance of chromosomes protein 4	12	5.65402	5.62924	5.56923	5.37241	5.66126	5.38922	5.64466	5.66404	5.57096	5.55429	5.71076	5.45295	5.62688	5.35784	5.63185	5.4863	5.62409	5.39999
P50454	SERPINH1	Serpin H1	12	5.60323	5.3005	5.54364	5.76233	5.57764	5.7296	5.58985	5.5155	5.49627	5.49396	5.47567	5.46765	5.48139	5.53717	5.57191	5.73822	5.57902	5.53645
Q8NB90	SPATA5	ATPase family protein 2 homolog	12	5.40749	5.62465	5.54947	5.42982	5.54045	5.48973	5.66788	5.66238	5.46265	5.40015	5.56177	5.67151	5.59544	5.56177	5.65872	5.69258	5.43175	5.59178
O60566-3	BUB1B	Isoform 3 of Mitotic checkpoint serine/threonine-protein kinase BUB1 beta	12	5.65763	5.30142	5.57718	5.51736	5.50011	5.49821	5.65502	5.49872	5.59621	5.40384	5.89883	5.455	5.44501	5.4253	5.65842	5.51675	5.79727	5.59773
Q8IZT6	ASPM	Abnormal spindle-like microcephaly-associated protein	12	5.28476	5.5374	5.48496	5.58839	5.54369	5.60947	5.60824	5.45521	5.48852	5.84463	5.49664	5.73062	5.70608	5.55987	5.50637	5.66592	5.42592	5.46331
Q9BXP5	SRRT	Serrate RNA effector molecule homolog	12	5.31528	5.71566	5.22001	5.83235	5.25018	5.96104	5.46122	5.77689	5.26886	5.77686	5.26704	5.81616	5.3412	5.92033	5.34392	5.78591	5.23965	5.70744
P11413-2	G6PD	Isoform Long of Glucose-6-phosphate 1-dehydrogenase	12	5.71328	5.61735	5.62629	5.54548	5.60093	5.44702	5.82801	5.43093	5.55645	5.29978	5.59653	5.34906	5.56854	5.52367	5.57434	5.51197	5.71036	5.50001
Q07955	SRSF1	Serine/arginine-rich splicing factor 1	12	5.58361	5.71987	5.62595	5.61239	5.5724	5.8134	5.61151	4.82424	5.6756	5.8729	5.5661	5.80327	5.59672	5.68528	5.57864	5.74433	5.30283	4.81096
Q96T23	RSF1	Remodeling and spacing factor 1	12	5.55397	5.68272	5.38474	5.50946	5.59514	5.56164	5.49662	5.7985	5.50579	5.47535	5.32149	5.57523	5.62482	5.55909	5.4537	5.48668	5.69591	5.71914
P50748	KNTC1	Kinetochore-associated protein 1	12	5.72534	5.26913	5.52215	5.42343	5.37574	5.31169	5.48992	5.25953	5.65035	5.64078	5.64058	5.55058	5.67043	5.44692	5.8075	5.64889	5.8856	5.68144
Q9NTI5	PDS5B	Sister chromatid cohesion protein PDS5 homolog B	12	5.73375	5.9512	5.23659	5.37334	5.78267	5.49177	5.56957	5.75873	5.43702	6.01275	5.26508	5.38456	5.60509	5.68033	5.51101	5.65891	5.3476	5.20004
Q13620	CUL4B	Cullin-4B	12	5.54105	5.21476	5.89493	5.37366	5.48144	5.49384	5.77271	5.08211	5.64578	5.3991	5.81195	5.54047	5.78258	5.32397	5.75135	5.35497	5.8818	5.65354
P46379-3	BAG6	Isoform 3 of Large proline-rich protein BAG6	12	5.51008	5.5334	5.40828	5.62152	5.53514	5.59745	5.30128	5.62483	5.36865	5.38281	5.5681	5.51189	5.32821	5.6153	5.7002	5.6907	5.87914	5.82302
P26640	VARS1	Valine--tRNA ligase	12	5.55716	5.67926	5.579	5.68475	5.58733	5.11025	5.53823	5.50384	5.76113	5.52506	5.42424	5.54246	5.62153	5.59326	5.62277	5.5038	5.61198	5.55394
Q16531	DDB1	DNA damage-binding protein 1	12	5.46168	5.64655	5.26182	5.65561	5.38663	5.7928	5.4904	5.81101	5.36473	5.74132	5.3471	5.58869	5.51875	5.82355	5.53145	5.7639	5.3133	5.50072
Q92841	DDX17	Probable ATP-dependent RNA helicase DDX17	12	5.78344	5.87284	5.30122	5.58259	5.62601	5.57976	5.53082	5.77588	5.47621	5.63358	5.13596	5.51757	5.64695	5.76981	5.4399	5.67416	5.24452	5.40876
Q8WUM4	PDCD6IP	Programmed cell death 6-interacting protein	12	5.52203	5.64397	5.52621	5.52333	5.46948	5.59314	5.57654	5.68903	5.40247	5.40883	5.55017	5.62062	5.63275	5.46208	5.70174	5.56415	5.57256	5.54089
Q7RTP6	MICAL3	[F-actin]-monooxygenase MICAL3	12	5.43959	5.53062	5.3997	5.62947	5.38974	5.69027	5.32826	5.71064	5.4513	5.4099	5.49481	5.52338	5.3573	5.78496	5.44604	5.80697	5.48693	6.12011
O95347	SMC2	Structural maintenance of chromosomes protein 2	12	5.49694	5.27833	5.48048	5.55291	5.31214	5.62202	5.62346	5.50185	5.80097	5.49087	5.67442	5.46127	5.51	5.47616	5.56346	5.57681	5.84823	5.72968
Q02218	OGDH	2-oxoglutarate dehydrogenase, mitochondrial	12	5.2643	5.4453	5.72182	5.33077	5.51768	5.31705	5.52171	5.49989	5.63879	5.36984	5.51717	5.62524	5.87118	5.43145	5.56666	5.63028	5.93627	5.79459
P04843	RPN1	Dolichyl-diphosphooligosaccharide--protein glycosyltransferase subunit 1	12	5.48014	5.4594	5.44826	5.32491	5.55153	5.39618	5.56528	5.4381	5.72882	5.4044	5.80277	5.4848	5.69079	5.57658	5.67043	5.5541	5.83372	5.58979
P45880-1	VDAC2	Isoform 1 of Voltage-dependent anion-selective channel protein 2	12	5.51795	5.96162	5.5536	5.3342	5.57264	5.4666	5.67492	5.64812	5.52626	5.39808	5.45536	5.51643	5.77126	5.77854	5.37739	5.37579	5.43897	5.63228
P30260-2	CDC27	Isoform 2 of Cell division cycle protein 27 homolog	11	5.68205	5.39024	5.69157	5.69255	5.56054	5.2425	5.45312	5.57081	5.50842	5.6436	5.5698	5.52968	5.54022	5.34192	5.66742	5.65081	5.58449	5.68025
P55060	CSE1L	Exportin-2	11	5.57249	5.59916	5.43475	5.4841	5.481	5.4434	5.4209	5.49577	5.61449	5.58961	5.63886	5.73616	5.61377	5.70329	5.79116	5.46684	5.52824	5.38601
P06753-2	TPM3	Isoform 2 of Tropomyosin alpha-3 chain	11	5.2757	5.39099	5.7266	5.55874	5.20817	5.4575	5.63889	5.66021	5.53999	5.37102	5.50642	5.93444	5.43786	5.67577	5.62287	5.64462	5.6397	5.71051
P27708	CAD	CAD protein	11	5.68449	5.65314	5.43223	5.64249	5.59763	5.59868	5.52957	5.81356	5.64921	5.41543	5.4502	5.36641	5.49584	5.49414	5.72843	5.62814	5.40147	5.41896
P46940	IQGAP1	Ras GTPase-activating-like protein IQGAP1	11	5.42545	5.33325	5.54984	5.17746	6.18755	5.3428	5.45134	5.5213	5.53233	5.53754	5.54071	5.32311	5.45482	5.21938	5.49782	6.90224	5.60541	5.39765
Q9Y490	TLN1	Talin-1	11	5.48663	5.25651	5.60993	5.49086	5.5113	5.66863	5.65394	5.57824	5.81874	5.44078	5.7203	5.49987	5.62502	5.38282	5.52164	5.38759	5.78601	5.56118
P07814	EPRS1	Bifunctional glutamate/proline--tRNA ligase	11	5.43081	5.71578	5.46354	5.55603	5.53085	5.69906	5.61418	5.9104	5.28685	5.54978	5.17746	5.59501	5.62159	5.77084	5.57752	5.69282	5.24868	5.55879
Q96GQ7	DDX27	Probable ATP-dependent RNA helicase DDX27	11	5.35238	5.45379	5.61838	5.58877	5.5709	5.43097	5.68192	5.35649	5.6226	5.70764	5.72627	5.35001	5.53556	5.48447	5.77049	5.40839	5.69787	5.6431
Q13428-4	TCOF1	Isoform 4 of Treacle protein	11	5.49559	5.76012	5.47015	5.69455	5.44951	5.73907	5.32542	5.89573	5.196	5.69967	5.30055	5.69106	5.40668	5.70484	5.3991	5.82583	5.21423	5.73192
Q13263	TRIM28	Transcription intermediary factor 1-beta	11	5.70196	5.37743	5.3909	5.68176	5.43469	5.93001	5.34569	5.61306	5.75332	5.35604	5.30978	5.55029	5.46305	5.61704	5.43364	5.75062	5.42893	5.8618
P09104	ENO2	Gamma-enolase	11	5.29886	5.53319	5.60232	5.9879	5.58099	5.77173	5.69316	5.35676	5.46827	5.63218	5.54603	5.62484	5.52294	5.55273	5.45677	5.6039	5.44097	5.32649
Q14315	FLNC	Filamin-C	11	5.59128	5.5467	5.55287	5.57514	5.52356	5.58856	5.56835	5.68967	5.61573	5.53931	5.41798	5.48197	5.40068	5.57229	5.50647	5.45664	5.65078	5.72202
P08238	HSP90AB1	Heat shock protein HSP 90-beta	11	5.59328	5.65893	5.68556	5.40597	5.71531	5.70878	5.68044	5.61007	5.7241	5.40107	5.39103	5.12904	5.6805	5.50638	5.74902	5.47847	5.47553	5.40654
A2RRP1	NBAS	Neuroblastoma-amplified sequence	11	5.41034	5.55271	5.42936	5.47036	5.58893	5.56196	5.62732	5.50368	5.49372	5.58236	5.53707	5.36684	5.95965	5.74992	5.58123	5.47675	5.65786	5.44994
Q9BYT8	NLN	Neurolysin, mitochondrial	11	5.36974	5.32597	5.56429	5.60811	5.71962	5.63452	5.6963	5.35898	5.57601	5.45363	5.7105	5.68499	5.65191	5.62771	5.72364	5.46542	5.52344	5.30523
P22314	UBA1	Ubiquitin-like modifier-activating enzyme 1	11	5.57438	5.49652	5.46075	5.57337	5.42234	5.74661	5.47363	5.70173	5.47255	5.57375	5.32543	5.52038	5.61909	5.61108	5.62765	5.67739	5.51353	5.60981
Q9BUJ2	HNRNPUL1	Heterogeneous nuclear ribonucleoprotein U-like protein 1	11	5.36147	5.58445	5.41041	5.78784	5.56822	5.23616	5.5412	5.83536	5.33592	5.59423	5.49454	5.32232	5.41521	5.55032	5.62854	5.46787	6.03753	5.82839
Q7Z6Z7	HUWE1	E3 ubiquitin-protein ligase HUWE1	11	5.55368	5.5414	5.37039	5.81731	5.52846	5.48274	5.37739	5.27877	5.78334	5.38947	5.68176	5.7112	5.60649	5.28056	5.57869	5.54402	5.79216	5.68215
Q9H2U2-2	PPA2	Isoform 2 of Inorganic pyrophosphatase 2, mitochondrial	11	5.71983	5.74063	5.69692	5.40613	5.5281	5.80417	5.49404	5.55204	5.3173	5.4752	5.55615	5.44631	5.5274	5.4336	5.44568	5.67399	5.52539	5.65713
P15880	RPS2	40S ribosomal protein S2	11	5.55662	5.77953	5.23986	5.63852	5.58365	5.71043	5.37012	5.84498	5.70394	5.65858	5.30449	5.65922	5.39374	5.66333	5.38092	5.52381	5.56585	5.42241
P54577	YARS1	Tyrosine--tRNA ligase, cytoplasmic	11	5.62962	5.38221	5.75123	5.67268	5.55437	5.6583	5.50252	5.54921	5.5404	5.37777	5.47559	5.38374	5.54341	5.59833	5.75967	5.61852	5.50565	5.49677
P00558	PGK1	Phosphoglycerate kinase 1	11	5.46968	5.62296	5.50932	5.5836	5.71025	5.60144	5.53108	5.94338	5.40479	5.62656	5.27774	5.39503	5.49595	5.66903	5.48838	5.50596	5.40574	5.75912
Q92945	KHSRP	Far upstream element-binding protein 2	11	5.62902	5.41311	5.64384	5.71697	5.6709	5.58823	5.67877	5.50164	5.4734	5.67085	5.5216	5.36499	5.5944	5.62033	5.70098	5.42023	5.36018	5.43053
P30419	NMT1	Glycylpeptide N-tetradecanoyltransferase 1	11	5.60155	5.57936	5.67485	5.55223	5.61689	5.54018	5.66959	5.45997	5.61545	5.56619	5.56146	5.37879	5.66996	5.70618	5.53768	5.38006	5.33267	5.55695
O00443	PIK3C2A	Phosphatidylinositol 4-phosphate 3-kinase C2 domain-containing subunit alpha	11	5.3798	5.40322	5.73923	5.74861	5.34597	5.58475	5.49677	5.47839	5.84952	5.54277	5.83875	5.53651	5.41424	5.3061	5.6452	5.23645	5.69438	5.75933
Q8IWV7	UBR1	E3 ubiquitin-protein ligase UBR1	11	5.6294	5.74383	5.82929	5.89548	5.58111	5.6629	5.34133	5.68586	5.68113	5.4703	5.39626	5.39989	5.51498	5.1973	5.49159	5.39188	5.44744	5.64003
Q8WVM8	SCFD1	Sec1 family domain-containing protein 1	11	5.45295	5.39937	5.67569	5.53053	5.7633	5.54761	5.73174	5.0957	5.61692	5.34322	5.71579	5.72613	5.48291	5.57487	5.56404	5.48304	5.5775	5.71872
P16615	ATP2A2	Sarcoplasmic/endoplasmic reticulum calcium ATPase 2	11	5.53235	5.51284	5.49292	5.37782	5.39707	5.78782	5.38749	5.4926	5.52604	5.73983	5.31737	5.6881	5.52074	5.73763	5.49544	5.73453	5.61707	5.64234
P12268	IMPDH2	Inosine-5'-monophosphate dehydrogenase 2	11	5.45934	5.33915	5.57627	5.57416	5.64556	5.46426	5.66228	5.32983	5.65794	5.67711	5.7169	5.50211	5.55305	5.54633	5.89627	5.48622	5.56267	5.35057
P63010-2	AP2B1	Isoform 2 of AP-2 complex subunit beta	11	5.5051	5.70642	5.46574	5.50367	5.619	5.61408	5.57484	5.52095	5.49921	5.46661	5.54483	5.50569	5.56972	5.63361	5.58755	5.50081	5.49075	5.69143
Q8N1F7	NUP93	Nuclear pore complex protein Nup93	11	5.54478	5.51244	5.48502	5.25059	5.57977	5.57687	5.41973	5.47966	5.60157	5.62559	5.50153	5.57728	5.44554	5.68429	5.69098	5.61728	5.74242	5.66466
Q13435	SF3B2	Splicing factor 3B subunit 2	11	5.74711	5.47687	5.5074	5.4455	5.62283	5.56154	5.6361	5.65026	5.6222	5.40367	5.51114	5.28037	5.75054	5.63172	5.70004	5.45352	5.6028	5.39642
Q9UHD9	UBQLN2	Ubiquilin-2	11	5.40741	5.77196	5.60788	5.74458	5.62397	5.16647	5.55633	5.73357	5.58802	5.48896	5.66337	5.70835	5.56681	5.5112	5.4798	5.71713	5.11347	5.55071
A0A499FIZ0	WDR26	WD repeat-containing protein 26	11	5.55997	5.89	5.54965	5.5526	5.59681	5.55413	5.59281	5.68401	5.52995	5.51177	5.54164	5.46908	5.33976	5.51319	5.47088	5.4166	5.73356	5.49359
Q9Y450	HBS1L	HBS1-like protein	11	5.62519	5.59552	5.55758	5.50111	5.48557	5.70814	5.51217	5.71218	5.65295	5.41536	5.46581	5.65884	5.57493	5.5112	5.50474	5.43438	5.61946	5.46488
Q06830	PRDX1	Peroxiredoxin-1	11	5.6493	5.27487	5.62267	5.2274	5.53664	5.54515	5.97545	5.67058	5.33908	5.43632	5.76627	5.85012	5.37983	5.92955	5.65829	5.63114	4.97068	5.53667
Q8NI27	THOC2	THO complex subunit 2	11	5.1491	5.78164	5.45539	5.61495	5.34813	5.64277	5.44241	5.92088	5.33419	5.74819	5.34832	5.59493	5.50977	5.80664	5.48288	5.67218	5.35015	5.79748
O75152	ZC3H11A	Zinc finger CCCH domain-containing protein 11A	11	5.68286	5.65437	5.61549	5.65148	5.26902	5.44308	5.7546	5.34862	5.41237	5.61987	5.63445	5.50335	5.58322	5.46755	5.58184	5.34241	5.77834	5.65708
P42566	EPS15	Epidermal growth factor receptor substrate 15	11	5.46218	5.26341	5.64297	5.74054	5.44314	5.68249	5.62454	5.51718	5.56008	5.39711	5.47023	5.33695	5.68827	5.34995	5.6008	5.90002	5.61327	5.70689
F5H2F4	MTHFD1	C-1-tetrahydrofolate synthase, cytoplasmic	11	5.30568	5.57251	5.4799	5.59892	5.51643	5.87877	5.40139	5.89889	5.20127	5.64585	5.40456	5.61382	5.47601	5.88508	5.23787	5.80934	5.38152	5.69219
P07686	HEXB	Beta-hexosaminidase subunit beta	11	5.47597	5.53425	5.83781	5.70535	5.63128	5.51268	5.51352	5.51541	5.66391	5.3645	5.56735	5.49956	5.47386	5.50969	5.4953	5.19902	5.85545	5.6451
P78344	EIF4G2	Eukaryotic translation initiation factor 4 gamma 2	11	5.55839	5.67678	5.49077	5.45217	5.49387	5.68128	5.33786	5.76303	5.61509	5.56921	5.50723	5.51097	5.44013	5.55859	5.50792	5.54755	5.58382	5.70533
Q13838-2	DDX39B	Isoform 2 of Spliceosome RNA helicase DDX39B	11	6.31267	5.76573	5.35776	5.47081	5.64855	5.67732	5.3479	5.72503	5.43141	5.48651	5.65623	5.59059	5.40657	5.69659	5.35778	5.39025	5.53376	5.14457
Q5LJA9	UCHL5	Ubiquitin carboxyl-terminal hydrolase (Fragment)	11	5.58988	5.56383	5.89808	5.40881	5.52043	5.39494	5.61497	5.39849	5.66438	5.33249	5.57844	5.38271	5.71578	5.40744	5.46521	5.46472	6.16794	5.43148
Q9H4M9	EHD1	EH domain-containing protein 1	11	5.90425	5.41575	5.57934	5.40764	5.64252	5.47463	5.43746	5.59566	5.46287	5.67634	5.64825	5.64364	5.40023	5.50754	5.50929	5.38394	5.57463	5.73602
Q09161	NCBP1	Nuclear cap-binding protein subunit 1	11	5.77098	5.65666	5.49854	5.50596	5.24347	5.68423	5.44324	5.89062	5.38425	5.64334	5.5883	5.73661	5.381	5.45888	5.40423	5.78382	5.41669	5.50919
Q96I99-2	SUCLG2	Isoform 2 of Succinate--CoA ligase [GDP-forming] subunit beta, mitochondrial	11	5.91996	5.529	5.65823	5.77916	5.63286	5.78984	5.80875	5.81134	5.59259	5.52393	5.52482	5.34067	5.50158	4.98289	5.46445	5.38706	5.41258	5.3403
P00367	GLUD1	Glutamate dehydrogenase 1, mitochondrial	11	5.7045	5.28459	5.77716	5.59821	5.60658	5.41238	5.5296	5.32764	5.76445	5.46879	5.64186	5.47451	5.7712	5.54988	5.59413	5.5574	5.5344	5.40271
P27816	MAP4	Microtubule-associated protein 4	11	5.88537	5.94955	5.5114	5.55277	5.51914	5.53329	5.42714	5.40652	5.51238	5.77287	5.58738	5.45684	5.37961	5.46392	5.42797	5.51823	5.47942	5.61623
Q9Y6M1	IGF2BP2	Insulin-like growth factor 2 mRNA-binding protein 2	11	5.55719	5.34884	5.83235	5.75144	5.51273	5.70736	5.58554	5.4946	5.33876	5.48524	5.61188	5.52746	5.61484	5.43573	5.59235	5.42991	5.4856	5.6882
P12277	CKB	Creatine kinase B-type	11	5.37305	5.77008	5.48521	5.55516	5.86509	5.5399	5.73572	5.03031	5.60657	5.39971	5.90449	5.77227	5.61875	5.69105	5.51368	5.49578	5.3662	5.27698
P07237	P4HB	Protein disulfide-isomerase	11	5.42719	5.29674	5.7159	5.45172	5.36782	5.41013	5.59335	5.41123	5.88118	5.498	5.79039	5.64721	5.50043	5.34498	5.69173	5.32073	5.86411	5.78715
O43660	PLRG1	Pleiotropic regulator 1	11	5.2946	5.46932	5.42507	5.5974	5.61881	5.71938	5.43764	5.44807	5.57843	5.62479	5.57802	5.57787	5.63572	5.64243	5.79653	5.80102	5.2706	5.4843
P52272	HNRNPM	Heterogeneous nuclear ribonucleoprotein M	11	5.82314	5.8951	5.26161	5.64654	5.55256	5.44316	5.45184	5.88345	5.47577	5.62122	5.52479	5.66752	5.37066	5.47195	5.65046	5.33185	5.52523	5.40315
O75116	ROCK2	Rho-associated protein kinase 2	11	5.42798	5.45482	5.76516	5.52064	5.51721	5.67768	5.64748	5.6755	5.55685	5.53525	5.55611	5.6874	5.38242	5.38479	5.50728	5.36405	5.59141	5.74796
P62937	PPIA	Peptidyl-prolyl cis-trans isomerase A	11	4.91133	5.55965	5.66374	5.104	5.82753	5.35072	5.79076	5.07427	5.73591	5.56516	6.08205	5.767	5.78089	5.5203	5.51617	5.70822	5.5668	5.4755
Q71DI3	H3C15	Histone H3.2	11	5.49025	5.6153	5.45733	5.49152	5.5664	5.52595	5.61143	5.5528	5.48403	5.82754	5.46462	5.4914	5.58351	5.55897	5.67156	5.65218	5.50527	5.44995
Q13423	NNT	NAD(P) transhydrogenase, mitochondrial	11	5.4379	5.52308	5.63828	5.58973	5.5277	5.46129	5.49962	5.72459	5.53167	5.37273	5.49609	5.72279	5.5296	5.51223	5.8281	5.48762	5.55812	5.55887
Q99873	PRMT1	Protein arginine N-methyltransferase 1	11	5.55667	5.57366	5.5835	5.68246	5.53214	5.6015	5.45194	5.30474	5.6468	5.37415	5.63053	5.7131	5.56709	5.51659	5.41462	5.68332	5.66427	5.5029
P04844	RPN2	Dolichyl-diphosphooligosaccharide--protein glycosyltransferase subunit 2	11	5.49702	5.35923	5.4749	5.4464	5.51581	5.40394	5.61857	5.57802	5.55494	5.35693	5.62643	5.79474	5.73144	5.55136	5.67718	5.48568	5.66661	5.6608
O75131	CPNE3	Copine-3	11	5.73454	5.40647	5.59818	5.38181	5.64658	5.59094	5.76078	5.25239	5.72665	5.48692	5.68895	5.55202	5.45174	5.48217	5.63228	5.2948	5.71101	5.60175
O43175	PHGDH	D-3-phosphoglycerate dehydrogenase	11	5.5139	5.51128	5.46522	5.37762	5.65365	5.54178	5.67697	5.73449	5.5233	5.49112	5.52679	5.47879	5.53424	5.73209	5.67389	5.70577	5.48142	5.37768
P29401-2	TKT	Isoform 2 of Transketolase	11	5.62641	5.45438	5.46499	5.66571	5.54667	5.41024	5.52603	5.53312	5.51027	5.4248	5.58588	5.67266	5.58022	5.73265	5.66757	5.67362	5.57822	5.34656
Q9Y277-2	VDAC3	Isoform 2 of Voltage-dependent anion-selective channel protein 3	10	5.77327	5.63813	5.49127	5.54333	5.48161	5.64946	5.52976	5.55837	5.60347	5.36064	5.3294	5.48231	5.54125	5.44161	5.65705	5.75678	5.58534	5.57694
Q12888-2	TP53BP1	Isoform 2 of TP53-binding protein 1	10	5.4906	5.40267	5.43762	5.2993	5.40523	5.1309	5.79908	5.72795	5.78996	5.33102	5.74208	5.54452	5.49149	5.50384	5.53068	5.7084	5.82565	5.83901
P54920	NAPA	Alpha-soluble NSF attachment protein	10	5.67823	5.31382	5.77775	5.13702	5.54753	5.5661	5.49018	5.35946	5.82129	5.44592	5.79453	5.35169	5.60897	5.43034	5.82192	5.35475	5.94256	5.55795
Q15233	NONO	Non-POU domain-containing octamer-binding protein	10	5.82156	5.51825	5.85377	5.69126	5.3852	5.7801	5.63518	5.18226	5.41925	5.53504	5.59454	5.42271	5.67234	5.57213	5.58552	5.79474	5.20617	5.32997
Q9NR30	DDX21	Nucleolar RNA helicase 2	10	5.56138	6.07279	5.45887	5.46277	5.4189	5.27734	5.57243	5.86234	5.41959	5.94593	5.29282	5.71447	5.34113	5.63149	5.56156	5.70945	5.31665	5.3801
P61247	RPS3A	40S ribosomal protein S3a	10	5.52064	5.77747	5.51574	5.6152	5.54289	5.41635	5.38103	5.6989	5.53497	5.53207	5.57629	5.6704	5.30902	5.46269	5.21058	5.78043	5.57818	5.87715
O75179	ANKRD17	Ankyrin repeat domain-containing protein 17	10	5.59894	5.65921	5.98262	5.09755	5.81484	5.32282	5.91366	5.24259	5.65117	5.48349	5.75072	5.17205	5.60713	5.59444	5.72955	5.22216	5.78887	5.36821
O60306	AQR	RNA helicase aquarius	10	5.37758	4.93178	5.53497	5.58871	5.91005	5.667	5.51361	5.39837	5.4841	5.50745	5.41756	5.9082	5.5779	5.34895	5.71177	5.68873	5.54106	5.89222
P46821	MAP1B	Microtubule-associated protein 1B	10	5.5898	5.66889	5.32616	5.62488	5.29129	5.35908	5.53187	5.72117	5.42206	5.77606	5.61278	5.54458	5.49948	5.57592	5.46478	5.34589	5.75286	5.89244
Q6UB35	MTHFD1L	Monofunctional C1-tetrahydrofolate synthase, mitochondrial	10	5.57214	5.25612	5.61757	5.48354	5.26491	5.45601	5.54811	5.4299	5.50258	5.69106	5.75729	5.50909	5.63217	5.56837	5.76862	5.51092	5.65526	5.77633
O14578-4	CIT	Isoform 4 of Citron Rho-interacting kinase	10	5.61668	5.54227	5.47775	5.61019	5.58606	5.55807	5.37565	5.58057	5.50487	5.57834	5.50349	5.55198	5.38139	5.45966	5.5254	5.74391	5.6191	5.78461
Q8IWJ2	GCC2	GRIP and coiled-coil domain-containing protein 2	10	5.46155	5.47504	5.72871	5.47341	5.58278	5.56542	5.66018	5.25743	5.7433	5.47636	5.54155	5.65041	5.4659	5.34209	5.57078	5.42186	5.87457	5.70866
P26639	TARS1	Threonine--tRNA ligase 1, cytoplasmic	10	5.44649	5.34827	5.72359	5.49019	5.67649	5.23803	5.61914	5.46324	5.65226	5.49153	5.99504	5.43765	5.40966	5.31362	5.74075	5.33056	5.87843	5.74507
Q9P2E9	RRBP1	Ribosome-binding protein 1	10	5.82992	5.8154	5.61293	5.38099	5.26627	5.56873	5.57026	5.41387	5.66036	5.88656	5.35264	5.33673	5.64638	5.42132	5.72256	5.39322	5.60987	5.51201
Q6ZNJ1	NBEAL2	Neurobeachin-like protein 2	10	5.45296	5.05507	5.5814	5.56004	5.62346	5.83644	5.54648	5.24436	5.73973	5.81119	5.61722	5.60414	5.56274	5.55705	5.725	5.44322	5.63418	5.40532
P40926	MDH2	Malate dehydrogenase, mitochondrial	10	5.74876	5.54756	5.69125	5.64681	5.80156	5.74911	5.58813	5.41641	5.65908	5.47234	5.38244	5.33695	5.63811	5.63573	5.48947	5.4447	5.35779	5.3938
Q93009	USP7	Ubiquitin carboxyl-terminal hydrolase 7	10	5.70067	5.74762	5.58675	5.46832	5.49684	5.75104	5.69699	5.7133	5.4631	5.47819	5.34386	5.6648	5.6113	5.40162	5.41498	5.52377	5.44828	5.48857
P35579	MYH9	Myosin-9	10	5.45952	5.41381	5.63241	5.96719	5.36196	5.60467	5.41025	5.77711	5.40646	5.37281	5.5674	5.72135	5.51303	5.5756	5.59759	5.62663	5.38791	5.60432
P23381	WARS1	Tryptophan--tRNA ligase, cytoplasmic	10	4.88969	5.80299	5.57192	5.86089	5.55639	5.07509	5.40295	5.61188	5.26874	5.56531	5.6805	5.69545	5.50011	6.55885	5.84683	5.42197	5.20584	5.4846
P62424	RPL7A	60S ribosomal protein L7a	10	5.46694	5.45471	5.7308	5.5833	5.62416	5.32273	5.49346	5.51868	5.56159	5.89062	5.60938	5.46955	5.95039	5.56185	5.61995	5.47127	5.35435	5.31627
P18583-5	SON	Isoform D of Protein SON	10	5.74042	5.19763	5.58082	5.72726	5.59095	5.69317	5.42769	5.61981	5.67629	5.53781	5.42909	5.41626	5.4743	5.58101	5.56009	5.69344	5.41212	5.64183
P50570	DNM2	Dynamin-2	10	5.60006	5.29221	5.62477	5.42594	5.48371	5.53813	5.84676	5.56267	5.65257	5.54743	5.66539	5.42181	5.65779	5.47742	5.59264	5.39998	5.68867	5.52203
Q5JSH3	WDR44	WD repeat-containing protein 44	10	5.79359	5.62189	5.49388	5.43221	5.51038	5.7154	5.35817	5.60387	5.55134	5.55614	5.52663	5.28223	5.37997	5.57242	5.62574	5.60912	5.71351	5.65352
Q13895	BYSL	Bystin	10	5.51173	5.46883	5.64493	5.64855	5.65279	5.59643	5.67487	5.75203	5.75674	5.26442	5.74161	5.34239	5.40313	5.38817	5.47585	5.26802	5.75098	5.65853
P14866	HNRNPL	Heterogeneous nuclear ribonucleoprotein L	10	4.97741	5.90893	5.74797	5.69096	5.57371	5.62153	5.70855	5.1908	5.37298	5.52764	5.53256	5.66019	5.73302	5.75847	5.30498	5.97892	5.38333	5.32806
P05091	ALDH2	Aldehyde dehydrogenase, mitochondrial	10	5.50654	5.81611	5.70216	5.53684	5.71382	5.51421	5.42085	5.41044	5.59618	5.46656	5.5768	5.28279	5.43472	5.46054	5.73616	5.26063	5.59197	5.9727
P40939	HADHA	Trifunctional enzyme subunit alpha, mitochondrial	10	5.47255	5.61217	5.3327	5.54315	5.51311	5.66301	5.53218	5.75072	5.37829	5.67769	5.42854	5.73668	5.39502	5.6474	5.75596	5.60964	5.31924	5.63197
Q63HN8-4	RNF213	Isoform 2 of E3 ubiquitin-protein ligase RNF213	10	5.39443	5.3447	5.79091	5.70088	5.63249	5.39379	5.74448	5.47746	5.63832	5.57024	5.4642	5.3403	5.46151	5.49442	5.59158	5.6292	5.76743	5.56366
Q9NR09	BIRC6	Baculoviral IAP repeat-containing protein 6	10	5.48836	5.64149	5.62313	5.40238	5.74031	5.52711	5.39775	5.52593	5.74644	5.54237	5.3369	5.24538	6.07624	5.4876	5.56063	5.3369	5.66016	5.66092
Q99497	PARK7	Parkinson disease protein 7	10	5.45033	5.72373	6.06741	5.83301	5.92372	5.35273	6.04445	3.97842	5.62606	5.70869	5.80499	5.74732	5.97664	6.23729	5.80991	5.36491	5.07784	4.27254
Q13177	PAK2	Serine/threonine-protein kinase PAK 2	10	5.47695	5.41156	5.65374	5.64643	5.60442	5.60795	5.65355	5.35544	5.43581	5.46444	5.66958	5.49442	5.63903	5.54824	5.58424	5.68096	5.60944	5.4638
Q5JRA6	MIA3	Transport and Golgi organization protein 1 homolog	10	5.56748	5.38772	5.41062	5.56923	5.6982	5.66792	5.54166	5.86871	5.49356	5.43681	5.57724	5.41321	5.67041	5.50374	5.49211	5.5211	5.64173	5.53858
Q9UHD2	TBK1	Serine/threonine-protein kinase TBK1	10	5.57394	5.47291	5.55265	5.59261	5.34218	5.53108	5.50984	5.56508	5.76155	5.59338	5.59856	5.41869	5.567	5.58115	5.47548	5.46914	5.77682	5.61797
P36578	RPL4	60S ribosomal protein L4	10	5.54675	5.51418	5.67748	5.71146	5.51113	5.11948	5.62864	5.06048	5.67954	5.95004	5.78426	5.86083	5.72478	5.37352	5.44157	5.49447	5.40629	5.51511
P26599	PTBP1	Polypyrimidine tract-binding protein 1	10	5.84792	5.56377	5.57563	5.64557	5.37746	5.49029	5.76624	5.35463	5.51291	5.54015	5.76584	5.56836	5.36098	5.45818	5.75643	5.3542	5.61316	5.44828
Q8IX12	CCAR1	Cell division cycle and apoptosis regulator protein 1	10	5.80017	5.59607	5.86079	5.69523	5.70448	5.39645	5.69279	5.42259	5.51458	5.38578	5.84552	5.37494	5.465	5.43708	5.53764	5.4356	5.36866	5.46662
P30613	PKLR	Pyruvate kinase PKLR	10	5.51763	5.25733	5.53715	5.64059	5.51281	5.50654	5.58748	5.60735	5.71728	5.49363	5.57595	5.38726	5.53352	5.41124	5.67136	5.47819	5.82899	5.73568
P56537	EIF6	Eukaryotic translation initiation factor 6	10	5.43625	5.9609	5.97297	5.75211	5.85848	5.89285	5.68724	3.85119	5.68457	6.07356	6.18007	6.16429	5.97858	6.03221	5.77316	5.31893	4.36999	4.01266
Q9H0A0	NAT10	RNA cytidine acetyltransferase	10	5.47392	5.74097	5.5738	5.59222	5.48046	5.31765	5.32334	5.77288	5.55599	5.66881	5.6308	5.58502	5.52005	5.48523	5.54469	5.60469	5.54256	5.58692
O00203	AP3B1	AP-3 complex subunit beta-1	10	5.64866	5.61686	5.43559	5.94109	5.35044	5.80133	5.41782	5.65175	5.52755	5.71276	5.37858	5.66476	5.4771	5.80632	5.20444	5.55083	5.44256	5.37156
Q16658	FSCN1	Fascin	10	5.51745	5.80173	5.60276	5.81417	5.44059	5.40275	5.2074	5.58741	5.69218	5.58628	5.22184	5.54596	5.55213	5.35348	5.35796	5.62703	5.71835	5.97054
P11387	TOP1	DNA topoisomerase 1	10	5.76584	6.49198	5.23647	5.27844	5.43452	5.68244	5.24837	5.8423	5.1905	5.92197	5.23046	5.30589	5.64854	5.91318	5.35754	5.84025	5.20907	5.40222
P51692	STAT5B	Signal transducer and activator of transcription 5B	10	5.60186	5.37767	5.60322	5.63528	5.69027	5.76039	5.63361	5.5442	5.52294	5.42871	5.47451	5.53229	5.47291	5.81761	5.41524	5.72055	5.31779	5.45096
P49750	YLPM1	YLP motif-containing protein 1	10	5.67875	5.5763	5.36999	5.476	5.43453	5.50173	5.65255	5.46619	5.5597	5.71505	5.43087	5.74079	5.42126	5.42139	5.69503	5.73512	5.55098	5.57378
Q99536	VAT1	Synaptic vesicle membrane protein VAT-1 homolog	10	5.58752	5.90429	5.42068	5.69464	5.57011	5.95972	5.35344	5.92341	5.32638	5.6454	5.246	5.38928	5.4648	5.77748	5.45128	5.79992	5.08431	5.40131
P60709	ACTB	Actin, cytoplasmic 1	10	5.49151	5.31856	6.05601	5.15743	5.5969	5.41569	5.8287	5.31315	6.10579	5.61667	5.57574	5.57337	5.69878	5.34357	5.43926	5.3664	5.64707	5.45541
Q8TED0	UTP15	U3 small nucleolar RNA-associated protein 15 homolog	10	5.87316	5.47468	5.52993	5.64934	5.91532	5.54488	5.50324	5.42871	5.52075	5.713	5.56679	5.59841	5.58863	5.6598	5.46794	5.44959	5.4366	5.07922
Q9Y281	CFL2	Cofilin-2	10	5.17698	5.7922	5.50867	5.59426	5.55255	5.69405	5.66235	5.52189	5.4542	5.70658	5.57503	5.66449	5.50376	5.75435	5.35911	5.78259	5.18895	5.508
O94979-8	SEC31A	Isoform 8 of Protein transport protein Sec31A	10	5.7028	6.01216	5.28629	5.60494	5.54187	5.72336	5.38265	5.78738	5.35712	5.67056	5.40323	5.77021	5.45193	5.74182	5.55988	5.75169	4.95966	5.29246
Q02790	FKBP4	Peptidyl-prolyl cis-trans isomerase FKBP4	10	5.61443	5.37198	5.6315	5.66416	5.68192	5.73577	5.67621	5.65292	5.74279	5.64436	5.38266	5.28616	5.49872	5.35844	5.75718	5.39135	5.57398	5.33546
Q16643-3	DBN1	Isoform 3 of Drebrin	10	5.09949	5.79756	5.43048	5.60334	5.70508	5.88467	5.82174	5.32798	5.53898	5.5874	5.39768	5.67811	5.60302	5.6395	5.70195	5.75375	5.22589	5.20337
Q14671-3	PUM1	Isoform 3 of Pumilio homolog 1	10	5.38034	5.48174	5.4799	5.50342	5.45425	5.43551	5.56468	5.56954	5.34431	5.55741	5.62716	5.48152	5.52453	5.54768	5.86689	5.64156	5.70376	5.83581
P19367-2	HK1	Isoform 2 of Hexokinase-1	10	5.29217	5.70243	5.65825	5.55091	5.63483	5.56441	5.43862	5.76352	5.58721	5.67326	5.46196	5.33129	5.40569	5.66489	5.24412	5.43053	5.9381	5.6578
P35606	COPB2	Coatomer subunit beta'	10	5.48471	5.48723	5.54885	5.58927	5.70607	5.63358	5.58155	5.67259	5.5318	5.14944	5.54845	5.45775	5.65633	5.53431	5.63359	5.29065	5.61707	5.87677
Q8NG31	KNL1	Kinetochore scaffold 1	10	5.40138	5.41892	5.48521	5.54665	5.49929	5.41003	5.42467	5.5262	5.62168	5.4393	5.50099	5.77908	5.48896	5.63347	5.63179	5.61052	5.75373	5.82813
Q92878-2	RAD50	Isoform 2 of DNA repair protein RAD50	10	5.49773	5.65598	5.36091	5.73055	5.32667	5.80851	5.32315	5.87085	5.57081	5.63361	5.2161	5.57309	5.32954	5.85347	5.44515	5.71041	5.3546	5.73888
O15042	U2SURP	U2 snRNP-associated SURP motif-containing protein	10	5.7852	5.49972	5.79542	5.593	5.41873	5.65271	5.65787	5.65124	5.61006	5.47189	5.50249	5.30153	5.44087	5.29645	5.46364	5.56934	5.73888	5.55096
Q10713	PMPCA	Mitochondrial-processing peptidase subunit alpha	10	5.44442	5.61295	5.63969	5.72398	5.57948	5.6794	5.54177	5.49944	5.51645	5.41564	5.59019	5.52144	5.51564	5.63122	5.73781	5.39717	5.41246	5.54087
P46087-2	NOP2	Isoform 2 of Probable 28S rRNA (cytosine(4447)-C(5))-methyltransferase	10	5.96296	6.21706	5.50039	5.89391	5.84654	5.42688	5.70758	5.43903	5.31102	5.89569	5.44617	5.24311	5.2961	5.46247	5.29391	5.54095	5.36451	5.15172
P08621	SNRNP70	U1 small nuclear ribonucleoprotein 70 kDa	10	5.45934	5.6166	5.68476	5.88154	5.70376	5.59072	5.50525	5.82468	5.43916	5.66569	5.42818	5.38367	5.44271	5.67061	5.55887	5.46831	5.18799	5.48817
Q8WWM7-3	ATXN2L	Isoform 3 of Ataxin-2-like protein	10	5.57795	5.66094	5.35006	5.42853	5.66266	5.30956	5.42738	5.48028	5.66267	5.3056	5.61723	5.69956	5.81692	5.46825	5.4373	5.60708	5.70878	5.77926
Q8NF50	DOCK8	Dedicator of cytokinesis protein 8	10	5.28541	5.41029	5.45836	5.70384	5.34932	5.48576	5.4951	5.40722	5.51653	5.54489	5.74381	5.7132	5.66473	5.43862	5.64425	5.80953	5.55523	5.77391
O43663	PRC1	Protein regulator of cytokinesis 1	10	5.35042	5.48176	5.28707	5.41159	5.28798	5.43635	5.47226	5.63406	5.48614	5.76106	5.35183	5.81395	5.52468	5.83564	5.64354	5.73636	5.67416	5.81114
P09651-2	HNRNPA1	Isoform A1-A of Heterogeneous nuclear ribonucleoprotein A1	10	5.75725	5.32418	5.50435	5.31647	5.68801	5.68255	5.72793	5.45282	5.75022	5.38555	5.63659	5.63109	5.81673	5.39013	5.48112	5.7532	5.41407	5.28774
Q13283	G3BP1	Ras GTPase-activating protein-binding protein 1	10	5.85319	5.47315	5.39693	5.48323	5.37719	5.51915	5.44031	5.54091	5.61887	5.51246	5.53993	5.38009	5.74379	5.53384	5.45156	5.47426	5.78798	5.87318
P21127	CDK11B	Cyclin-dependent kinase 11B	10	5.8178	5.47027	5.57077	5.32794	5.72765	5.6134	5.80758	5.55749	5.65168	5.4822	5.6031	5.55992	5.72169	5.39201	5.46308	5.39861	5.50902	5.3258
Q9Y266	NUDC	Nuclear migration protein nudC	10	5.67031	5.6341	5.46371	5.5216	5.67502	5.45958	5.50044	5.61216	5.53865	5.57885	5.4411	5.27786	5.40879	5.64405	5.51629	5.67211	5.66626	5.71914
Q15046-2	KARS1	Isoform Mitochondrial of Lysine--tRNA ligase	10	5.39656	6.19608	5.05412	5.69022	5.39149	5.88867	5.28279	6.23351	5.18783	5.83451	4.9658	5.85207	5.26068	6.2441	5.17827	5.9393	4.85585	5.54816
Q9Y3Z3	SAMHD1	Deoxynucleoside triphosphate triphosphohydrolase SAMHD1	10	5.82141	5.79351	5.5184	5.49652	5.86804	5.72105	5.52677	5.67446	5.56131	5.57999	5.29365	5.28559	5.52306	5.59259	5.62493	5.59695	5.13586	5.38591
P07910	HNRNPC	Heterogeneous nuclear ribonucleoproteins C1/C2	10	5.66931	5.67789	5.80077	5.64023	5.66454	5.64062	5.64835	5.23906	5.39961	5.59982	5.38866	5.52219	5.47925	5.48938	5.66867	5.53894	5.6157	5.31701
Q13045	FLII	Protein flightless-1 homolog	10	5.08998	5.35304	5.69929	5.92581	5.74967	5.67128	5.56354	5.52852	5.51003	5.41805	5.5366	5.41336	5.5293	5.37896	5.67144	5.68223	5.54543	5.73347
O15382	BCAT2	Branched-chain-amino-acid aminotransferase, mitochondrial	9	5.73783	5.50792	5.38636	5.46977	5.60251	5.6004	5.71204	5.4858	5.45098	5.52796	5.59063	5.30769	5.58194	5.53204	5.72121	5.45142	5.90003	5.43347
Q92614	MYO18A	Unconventional myosin-XVIIIa	9	5.29524	5.41742	5.65711	5.64228	5.52117	5.2643	5.89133	5.81483	5.45609	5.49505	5.45125	5.69809	5.42464	5.7737	5.7568	5.5107	5.32568	5.60433
P50416	CPT1A	Carnitine O-palmitoyltransferase 1, liver isoform	9	5.75368	5.42732	5.54637	5.33289	5.53239	5.19268	5.40422	5.50059	5.61188	5.52351	5.49267	5.4144	5.83597	5.41207	5.77211	5.54817	5.94778	5.75132
Q08211	DHX9	ATP-dependent RNA helicase A	9	5.60281	5.54642	5.69794	5.55032	5.40865	5.70037	5.58338	5.51705	5.63314	5.33919	5.59616	5.33573	5.54892	5.64879	5.50971	5.62134	5.58036	5.5797
P35520-2	CBS	Isoform 2 of Cystathionine beta-synthase	9	5.95696	5.48006	5.34309	5.59655	5.65887	5.41173	5.1795	5.57811	5.24212	5.72808	5.85536	5.81826	5.4874	5.52239	5.62087	5.37853	5.85942	5.28268
O75367	MACROH2A1	Core histone macro-H2A.1	9	5.61151	5.90347	5.45849	5.3298	5.74105	5.59589	5.42863	5.42966	5.52208	5.66997	5.23258	5.55704	5.66484	5.62716	5.63022	5.5036	5.36646	5.72756
Q14683	SMC1A	Structural maintenance of chromosomes protein 1A	9	5.63354	5.24044	5.76153	5.53184	5.52411	5.42901	5.67221	5.50668	5.69257	5.31356	5.78469	5.5355	5.41335	5.21264	5.68469	5.42213	6.02478	5.61675
P13804	ETFA	Electron transfer flavoprotein subunit alpha, mitochondrial	9	5.36308	5.57899	5.35586	5.6174	5.71277	5.55235	5.8108	5.58006	5.57081	5.60737	5.45372	5.62164	5.59633	5.67162	5.49805	5.51337	5.57257	5.32321
P22234-2	PAICS	Isoform 2 of Multifunctional protein ADE2	9	5.69053	5.5122	5.56358	5.2539	5.73073	5.31681	5.4871	5.67626	5.78041	5.5724	5.53521	5.67359	5.66881	5.54385	5.26622	5.64084	5.56969	5.51788
Q15652	JMJD1C	Probable JmjC domain-containing histone demethylation protein 2C	9	5.78163	5.33285	5.50711	5.59587	5.38219	5.37818	5.48878	5.36951	5.56977	5.56014	5.77196	5.55981	5.61541	5.28158	5.63581	5.69123	5.84001	5.63816
Q9H2M9	RAB3GAP2	Rab3 GTPase-activating protein non-catalytic subunit	9	5.29076	5.46082	5.54025	5.47028	5.62484	5.39682	5.42899	5.48773	5.57973	5.6841	5.64593	5.5297	5.71429	5.45402	5.68228	5.67246	5.65372	5.68329
P62269	RPS18	40S ribosomal protein S18	9	5.71098	5.67657	5.86028	5.49536	5.63511	5.37511	5.69077	5.60242	5.47879	5.36407	5.43823	5.6514	5.48944	5.58969	5.47232	5.65636	5.50259	5.31052
O15027-5	SEC16A	Isoform 5 of Protein transport protein Sec16A	9	5.29635	5.30578	5.62714	5.64368	5.47825	5.40887	5.58517	5.57378	5.54811	5.57713	5.53239	5.50151	5.68408	5.6982	5.73334	5.49456	5.49551	5.81614
O75376	NCOR1	Nuclear receptor corepressor 1	9	5.54496	5.74458	5.69999	5.46078	5.48247	5.48461	5.52011	5.37027	5.86767	5.69434	5.46492	5.25842	5.46547	5.50037	5.70846	5.56377	5.6882	5.48061
Q8IWZ3	ANKHD1	Ankyrin repeat and KH domain-containing protein 1	9	5.19635	5.65776	5.86995	5.77435	5.36549	5.54986	5.68157	4.98932	5.52637	5.65007	5.59012	5.59828	5.74442	5.80733	5.60207	5.46095	5.48307	5.45266
Q10570	CPSF1	Cleavage and polyadenylation specificity factor subunit 1	9	5.52303	5.40764	5.65758	5.50117	5.34518	5.57952	5.52996	5.53972	5.46418	5.57172	5.53991	5.77825	5.57957	5.32063	5.57634	5.58708	5.85272	5.64582
Q01082	SPTBN1	Spectrin beta chain, non-erythrocytic 1	9	5.56071	5.54664	5.52862	5.471	5.35194	5.55623	5.36416	5.59653	5.63735	5.64722	5.59601	5.57457	5.57362	5.45423	5.52598	5.55265	5.69402	5.76849
Q5JSZ5	PRRC2B	Protein PRRC2B	9	5.33138	5.38051	5.59293	5.6266	5.62693	5.51567	5.42873	5.62959	5.51375	5.7213	5.41444	5.68874	5.45087	5.40828	5.67454	5.59712	5.56344	5.83516
Q8N3U4-2	STAG2	Isoform 2 of Cohesin subunit SA-2	9	5.8683	5.63649	5.44268	5.55935	5.4847	5.76986	5.39767	5.70833	5.49945	5.74794	5.55225	5.54202	5.56136	5.70125	5.38719	5.6345	5.20012	5.30655
P61088	UBE2N	Ubiquitin-conjugating enzyme E2 N	9	5.53665	5.50135	5.4661	5.72543	5.62112	5.52444	5.61533	5.71567	5.53578	5.44345	5.36192	5.6004	5.62029	5.7906	5.51475	5.60605	5.29221	5.52845
P63244	RACK1	Receptor of activated protein C kinase 1	9	5.4374	5.4451	5.37882	5.53658	5.85104	5.85307	5.67246	5.6526	5.55288	5.65062	5.51556	5.75224	5.66713	5.55486	5.39261	5.75261	5.19545	5.13894
P34932	HSPA4	Heat shock 70 kDa protein 4	9	5.87075	5.2081	5.6403	5.51947	5.4927	5.42536	5.60723	5.45581	5.64125	5.44482	5.69252	5.35419	5.61425	5.44798	5.80564	5.42424	5.6716	5.68377
P04075-2	ALDOA	Isoform 2 of Fructose-bisphosphate aldolase A	9	5.23677	5.31843	5.38532	4.90344	5.48687	5.2991	5.60538	5.71966	5.47505	5.07699	5.93934	6.01156	5.95233	6.07653	5.55552	5.63605	5.56493	5.75674
Q15269	PWP2	Periodic tryptophan protein 2 homolog	9	5.63912	5.26682	5.72666	5.67218	5.63922	5.45893	5.54482	5.3557	5.60406	5.46668	5.47728	5.51765	5.61535	5.33763	5.69779	5.53382	5.86214	5.58415
Q9BQE3	TUBA1C	Tubulin alpha-1C chain	9	5.83007	5.51881	5.42855	5.28826	5.62767	5.69998	5.36826	5.90449	5.53479	5.67534	5.56257	5.6353	5.43117	5.59331	5.2883	5.24956	5.83874	5.52486
Q7Z392	TRAPPC11	Trafficking protein particle complex subunit 11	9	5.71196	5.29898	5.84158	5.59849	5.57439	5.43111	5.74296	5.43658	5.52537	5.32375	5.72926	5.5717	5.51305	5.44821	5.6355	5.34	5.60498	5.67212
Q96EE3-1	SEH1L	Isoform B of Nucleoporin SEH1	9	5.73042	5.4625	5.44698	5.47349	5.54216	5.39168	5.95418	5.64679	5.75252	5.41928	5.54811	5.17975	5.30712	5.69554	5.66384	5.40649	5.8856	5.49355
Q96PZ0-2	PUS7	Isoform 2 of Pseudouridylate synthase 7 homolog	9	5.87084	5.57872	5.43341	5.59728	5.51969	5.51708	5.52276	5.41464	5.45415	5.54013	5.76871	5.46382	5.63112	5.33731	5.60547	5.41534	5.78699	5.54252
Q9BUF5	TUBB6	Tubulin beta-6 chain	9	5.8083	5.42483	5.70273	5.7502	5.72604	5.31217	5.71521	5.91639	5.68911	5.32518	5.40332	5.50565	5.42939	5.31445	5.51066	5.32621	5.72102	5.41915
Q07960	ARHGAP1	Rho GTPase-activating protein 1	9	5.43482	5.85226	5.18628	5.59577	5.48003	5.74893	5.30703	5.89054	5.62306	5.71276	5.55015	5.40918	5.29321	5.71679	5.45786	5.67946	5.36047	5.7014
P53396-2	ACLY	Isoform 2 of ATP-citrate synthase	9	5.73539	5.44154	5.57638	5.69182	5.59593	5.51765	5.56096	5.42477	5.53089	5.36194	5.64734	5.57442	5.52019	5.26456	5.63704	5.4653	5.85512	5.59876
O43592	XPOT	Exportin-T	9	5.62787	5.37912	5.71825	5.48659	5.60323	5.33357	5.64733	5.67342	5.73983	5.52127	5.59563	5.53041	5.73094	5.32375	5.6442	5.41323	5.70574	5.32563
Q9UBF2	COPG2	Coatomer subunit gamma-2	9	5.44903	5.6108	5.65654	5.65193	5.72518	5.55921	5.39977	5.74282	5.56626	5.45611	5.68504	5.36123	5.40335	5.64337	5.67686	5.47476	5.51326	5.42447
P49368	CCT3	T-complex protein 1 subunit gamma	9	5.49903	5.56976	5.44129	5.53436	5.59367	5.66424	5.63794	5.75607	5.32115	5.53938	5.51424	5.6997	5.55464	5.59693	5.49187	5.51716	5.53191	5.53665
P29144	TPP2	Tripeptidyl-peptidase 2	9	5.59843	5.77217	5.59009	5.53507	5.40776	5.56593	5.51542	5.52091	5.6436	5.58087	5.23751	5.39771	5.45203	5.61236	5.58512	5.58211	5.63777	5.76513
Q13451	FKBP5	Peptidyl-prolyl cis-trans isomerase FKBP5	9	5.72047	5.51443	5.44292	5.62429	5.44091	5.58887	5.43459	5.44885	5.80964	5.38068	5.67988	5.68568	5.21411	5.53868	5.54698	5.79725	5.69287	5.43891
Q16401	PSMD5	26S proteasome non-ATPase regulatory subunit 5	9	5.66948	5.80849	5.45201	5.69379	5.69749	5.85134	5.54142	5.6086	5.58664	5.65521	5.40221	5.47151	5.50757	5.48864	5.3777	5.47097	5.21449	5.50244
Q6WKZ4	RAB11FIP1	Rab11 family-interacting protein 1	9	5.18998	7.38123	5.28612	5.5078	5.3182	5.4095	5.36331	6.1936	5.20154	5.57656	5.37166	5.60712	5.22436	5.37189	5.54468	5.19716	5.53107	5.72423
Q15154-2	PCM1	Isoform 2 of Pericentriolar material 1 protein	9	5.81374	5.48831	5.60666	5.3199	5.59489	5.69131	5.67959	5.5894	5.56981	5.29744	5.41679	5.43627	5.7162	5.45401	5.67554	5.67713	5.63772	5.33529
Q12830	BPTF	Nucleosome-remodeling factor subunit BPTF	9	5.481	5.68474	5.76951	5.38249	5.72191	5.64615	5.62205	5.86129	5.51453	5.11167	5.63284	5.36594	5.63541	5.50979	5.36828	5.46693	5.69992	5.52558
P09874	PARP1	Poly [ADP-ribose] polymerase 1	9	5.57851	5.40949	5.6907	5.38193	5.60185	5.6291	5.61561	5.65752	5.45192	5.41261	5.49178	5.51419	5.62365	5.53382	5.64323	5.65604	5.63705	5.471
O43847-2	NRDC	Isoform 2 of Nardilysin	9	5.73313	5.48918	5.52075	5.41795	5.54507	5.61526	5.50436	5.55509	5.54418	5.47069	5.57698	5.75797	5.72077	5.55141	5.55033	5.51586	5.55498	5.37604
Q8TEX9-2	IPO4	Isoform 2 of Importin-4	9	5.7945	5.65508	5.5198	5.66	5.81362	5.46823	5.43436	5.50133	5.72042	5.71283	5.355	5.43856	5.58903	5.27924	5.32704	5.64871	5.36201	5.72024
P39880-3	CUX1	Isoform 3 of Homeobox protein cut-like 1	9	5.58926	4.80056	5.8263	5.58108	5.47086	5.54381	5.65663	5.08348	5.81261	5.58296	5.89922	5.47891	5.74413	5.4244	5.46169	5.71252	5.62544	5.70615
O75306	NDUFS2	NADH dehydrogenase [ubiquinone] iron-sulfur protein 2, mitochondrial	9	5.38043	5.92812	5.28947	5.41992	5.69294	5.82146	5.53794	5.74319	5.50278	5.67348	5.5186	5.87769	5.48841	5.81316	5.42947	5.49279	5.32939	5.06075
Q15418-2	RPS6KA1	Isoform 2 of Ribosomal protein S6 kinase alpha-1	9	5.57241	5.22907	5.59222	5.38327	5.77376	5.46403	5.67002	5.57241	5.79869	5.44931	5.58175	5.34803	5.69793	5.44047	5.69459	5.4884	5.7573	5.48636
P52895	AKR1C2	Aldo-keto reductase family 1 member C2	9	5.83031	5.56947	5.56654	5.61762	5.73151	5.43	5.59213	5.45253	5.6388	5.41748	5.52095	5.38405	5.5975	5.57776	5.61511	5.52753	5.52686	5.40386
Q96R06	SPAG5	Sperm-associated antigen 5	9	5.4893	5.68481	5.43481	5.7259	5.49962	5.84735	5.38424	5.87824	5.39182	5.74745	5.36666	5.63589	5.42924	5.81671	5.37669	5.72121	5.27889	5.29116
P30622	CLIP1	CAP-Gly domain-containing linker protein 1	9	5.91133	5.4301	5.76715	5.51498	5.53204	5.63748	5.54108	5.46324	5.83606	5.29438	5.28617	5.23824	5.70707	5.54041	5.91191	5.3497	5.63101	5.40766
Q7Z2W4	ZC3HAV1	Zinc finger CCCH-type antiviral protein 1	9	5.52415	5.63539	5.23811	5.72143	5.2195	5.5969	5.47279	5.88844	5.51024	5.91977	5.43708	5.76428	5.44535	5.63015	5.26326	5.82916	5.24789	5.6561
P10515	DLAT	Dihydrolipoyllysine-residue acetyltransferase component of pyruvate dehydrogenase complex, mitochondrial	9	5.70614	5.52407	5.24184	5.72452	5.46794	5.70359	5.42958	5.5293	5.72031	5.66839	5.35984	5.51993	5.64976	5.57544	5.57704	5.63634	5.509	5.45699
O00411	POLRMT	DNA-directed RNA polymerase, mitochondrial	9	5.69566	5.29299	5.67868	5.59992	5.5766	5.50738	5.42994	5.48528	5.53323	5.43078	5.8039	5.39988	5.79564	5.28979	5.6723	5.55122	5.71569	5.54113
P69891	HBG1	Hemoglobin subunit gamma-1	9	5.46444	5.5684	5.78095	5.68934	5.42587	5.35413	5.51006	5.83348	5.33134	5.45129	5.45749	5.6825	5.47489	5.61766	5.64912	5.57932	5.38319	5.74653
Q86VP6	CAND1	Cullin-associated NEDD8-dissociated protein 1	9	5.42335	5.61636	5.57078	5.72197	5.49225	5.40424	5.39489	5.63277	5.59784	5.67781	5.61345	5.77645	5.67682	5.42414	5.51163	5.54899	5.29098	5.62528
P62195	PSMC5	26S proteasome regulatory subunit 8	9	5.4554	5.4535	5.60543	5.51808	5.42126	5.57683	5.54962	5.69885	5.54447	5.54838	5.71195	5.56023	5.28891	5.63219	5.76227	5.50903	5.58905	5.57455
O75153	CLUH	Clustered mitochondria protein homolog	9	5.88156	5.56748	5.63261	5.65951	5.66919	5.60093	5.42795	5.45499	5.65523	5.48253	5.56469	5.34859	5.62811	5.56036	5.5463	5.19077	5.67614	5.45307
Q9UJX4	ANAPC5	Anaphase-promoting complex subunit 5	9	5.50817	5.54035	5.63236	5.65338	5.53379	5.44536	5.41379	5.54233	5.33836	5.63319	5.62887	5.7111	5.46543	5.49838	5.445	5.51445	5.64435	5.85136
O94788	ALDH1A2	Retinal dehydrogenase 2	9	5.71954	5.55727	5.65321	5.50589	5.66006	5.56029	5.55807	5.80118	5.74614	5.5926	5.44633	5.50953	5.58055	5.44094	5.48242	5.44067	5.53709	5.20824
Q8IWV8	UBR2	E3 ubiquitin-protein ligase UBR2	9	5.56674	5.67666	5.14326	5.70224	5.76919	5.78932	5.49277	5.84877	5.60728	5.55091	5.49705	5.17598	5.6196	5.63354	5.51115	5.73379	5.36369	5.31805
P52209	PGD	6-phosphogluconate dehydrogenase, decarboxylating	9	5.6839	5.47884	5.84057	5.44067	5.75075	5.52867	5.74062	5.66391	5.74027	5.29434	5.43104	5.38028	5.80727	5.35549	5.6313	5.45929	5.43888	5.33394
P28331-2	NDUFS1	Isoform 2 of NADH-ubiquinone oxidoreductase 75 kDa subunit, mitochondrial	9	5.46216	5.27551	5.69296	5.55562	5.46241	5.44304	5.92984	5.53021	5.4824	5.63974	5.64404	5.5532	5.57773	5.54709	5.67681	5.58553	5.49287	5.44885
P63104	YWHAZ	14-3-3 protein zeta/delta	9	5.63388	5.25327	5.68584	5.43955	5.50892	5.42051	5.55294	5.35719	5.80426	5.47738	5.78538	5.56612	5.65646	5.31313	5.634	5.41974	5.89148	5.59995
P54136	RARS1	Arginine--tRNA ligase, cytoplasmic	9	5.58647	5.67158	5.40375	5.72976	5.711	5.56339	5.41209	5.84438	5.48843	5.55102	5.61738	5.61298	5.67732	5.49676	5.46296	5.47473	5.51419	5.18182
Q86U86	PBRM1	Protein polybromo-1	9	5.55092	5.61971	5.31729	5.58606	5.58063	5.53159	5.49035	5.43157	5.70003	5.55257	5.58376	5.43998	5.37181	5.60332	5.3664	5.51925	5.75995	5.9948
Q12955	ANK3	Ankyrin-3	9	5.80223	5.56025	5.3526	5.41622	5.64197	5.63052	5.67235	5.58436	5.5788	5.56125	5.36654	5.40111	5.7357	5.70755	5.79492	5.60985	5.31026	5.27351
Q5TAX3	TUT4	Terminal uridylyltransferase 4	9	6.08947	5.68558	5.82825	5.71516	5.55267	5.48146	5.45395	5.34697	5.3044	5.48703	5.39834	5.84456	5.38507	5.42851	5.43469	5.482	5.49957	5.58233
P40692	MLH1	DNA mismatch repair protein Mlh1	9	5.57058	5.44751	5.63837	5.60371	5.22864	5.62679	5.40378	5.41921	5.47084	5.73741	5.5634	5.73915	5.71201	5.51498	5.33103	5.68326	5.73308	5.57625
Q9HD20	ATP13A1	Endoplasmic reticulum transmembrane helix translocase	9	5.34113	5.24918	5.6347	5.69479	5.15962	5.4713	5.6042	5.65845	5.39099	5.46301	5.91373	5.63012	5.43587	5.04762	6.05825	5.58869	6.03151	5.62682
Q9Y6D6	ARFGEF1	Brefeldin A-inhibited guanine nucleotide-exchange protein 1	9	5.27796	5.39211	5.42786	5.38225	5.42905	5.79101	5.33583	6.09141	5.81114	5.25832	5.53721	5.71683	5.41966	5.5227	5.67289	5.55536	5.53102	5.84739
O75122-3	CLASP2	Isoform 3 of CLIP-associating protein 2	9	5.9373	5.68448	5.43012	5.43133	5.45321	5.4959	5.33638	5.50407	5.44562	5.31417	5.77345	5.78456	5.60277	5.50506	5.50394	5.43653	5.83786	5.52326
P53621-2	COPA	Isoform 2 of Coatomer subunit alpha	9	5.69646	5.38861	5.63354	5.3432	5.46741	5.56734	5.80728	5.74676	5.50017	5.6851	5.58903	5.44033	5.62892	5.53909	5.62208	5.48688	5.49924	5.35857
P62805	H4C1	Histone H4	9	5.5609	5.84726	5.41299	5.42186	5.50881	5.65676	5.46835	5.90019	5.5923	5.56433	5.2605	5.38826	5.56489	5.8363	5.41417	5.55526	5.52348	5.52338
Q9H501	ESF1	ESF1 homolog	9	5.46708	5.30377	5.58077	5.64138	5.57106	5.5759	5.52654	5.70954	5.64699	5.38592	5.61442	5.42326	5.34369	5.46575	5.67869	5.39442	5.71962	5.95119
Q16822	PCK2	Phosphoenolpyruvate carboxykinase [GTP], mitochondrial	9	5.47474	5.45104	5.63595	5.46914	5.55873	5.56756	5.57864	5.63934	5.37218	5.53471	5.61849	5.76849	5.67003	5.41778	5.61866	5.70966	5.5365	5.37834
P23921	RRM1	Ribonucleoside-diphosphate reductase large subunit	9	5.84737	5.37972	5.47237	5.41062	5.82932	5.53786	5.72494	5.33678	5.77352	5.29642	5.67251	5.24232	5.81692	5.49269	5.71137	5.22979	5.65345	5.57203
Q9NSI8-3	SAMSN1	Isoform 3 of SAM domain-containing protein SAMSN-1	9	5.59974	5.61084	5.50582	5.43447	5.46734	5.68194	5.41752	5.79109	5.54188	5.46302	5.56682	5.22585	5.62487	5.48584	5.67846	5.7618	5.63386	5.50884
P09001	MRPL3	39S ribosomal protein L3, mitochondrial	9	5.67448	5.29241	5.47943	5.42957	5.67611	5.40354	5.48622	5.64569	5.58525	5.60044	5.6352	5.52423	5.60353	5.65398	5.67818	5.59281	5.58433	5.45463
Q99613	EIF3C	Eukaryotic translation initiation factor 3 subunit C	9	5.62368	5.42168	5.62689	5.76212	5.37126	5.57476	5.37981	5.48218	5.79857	5.50306	5.61072	5.54565	5.48962	5.50576	5.43765	5.53002	5.71119	5.62538
Q14240-2	EIF4A2	Isoform 2 of Eukaryotic initiation factor 4A-II	9	5.66331	5.79823	5.64961	5.28225	5.88169	5.53871	5.17383	5.36796	5.48384	5.49066	5.71363	5.82062	5.07966	5.39455	5.75449	5.30117	5.81652	5.78925
Q13228-4	SELENBP1	Isoform 4 of Methanethiol oxidase	9	5.20572	5.73907	5.44315	5.68899	5.63104	5.51581	5.70387	5.36557	5.53903	5.59833	5.65013	5.65883	5.48253	5.84905	5.53916	5.78159	5.16383	5.44428
P08670	VIM	Vimentin	9	5.63777	5.63971	5.43827	5.56014	5.59833	5.66035	5.43795	5.82014	5.43543	5.52517	5.39816	5.62471	5.58181	5.73008	5.4117	5.50635	5.51679	5.47714
P31040	SDHA	Succinate dehydrogenase [ubiquinone] flavoprotein subunit, mitochondrial	9	5.5167	5.51434	5.6441	5.54636	5.62966	5.50699	5.76303	5.06899	5.7746	5.66804	5.57399	5.76907	5.71376	5.59069	5.60663	5.37304	5.67436	5.06567
Q9UHX1	PUF60	Poly(U)-binding-splicing factor PUF60	9	5.94718	5.39082	5.54093	5.71954	5.61776	5.34217	5.45121	5.49453	5.76366	5.42172	5.37497	5.63292	5.5886	5.83292	5.50161	5.03115	5.64716	5.70114
P46459	NSF	Vesicle-fusing ATPase	9	5.75022	5.74418	5.19427	5.40848	5.5705	5.64373	5.35466	5.88723	5.65784	5.46833	5.18883	5.67224	5.35875	5.68355	5.53601	5.63935	5.73088	5.51094
Q9C0C2	TNKS1BP1	182 kDa tankyrase-1-binding protein	9	5.4597	5.6886	5.48137	5.51112	5.38279	5.40182	5.70696	5.72128	5.51542	5.6425	5.55786	5.6699	5.6137	5.27182	5.60856	5.43988	5.55355	5.77316
Q15029	EFTUD2	116 kDa U5 small nuclear ribonucleoprotein component	9	5.70588	5.78258	5.23901	5.48531	5.69644	6.07264	5.44231	5.97786	5.23476	5.54631	5.33251	5.56531	5.89606	5.59937	5.42796	5.5086	5.31102	5.17606
Q9Y6J0	CABIN1	Calcineurin-binding protein cabin-1	9	5.78018	5.60362	5.58025	5.81687	5.42273	5.58935	5.25673	5.80868	5.59684	5.41124	5.61148	5.49886	5.35991	5.5213	5.52698	5.57199	5.41728	5.6257
Q9Y262	EIF3L	Eukaryotic translation initiation factor 3 subunit L	9	5.78486	5.58055	5.53767	5.49039	5.58896	5.6997	5.43354	5.54159	5.54858	5.54813	5.5573	5.59307	5.73743	5.67699	5.59786	5.43648	5.41436	5.23255
Q70CQ2	USP34	Ubiquitin carboxyl-terminal hydrolase 34	9	5.35004	5.40442	5.64307	5.49652	5.46047	5.51644	5.72242	5.43721	5.68887	5.51766	5.78167	5.52087	5.60508	5.29187	5.62531	5.5658	5.81761	5.55467
Q15008	PSMD6	26S proteasome non-ATPase regulatory subunit 6	9	5.6463	5.73947	5.60456	5.78613	5.57724	5.6762	5.52934	5.79569	5.37634	5.55812	5.37046	5.52076	5.50913	5.64612	5.41311	5.53152	5.39111	5.3284
P38159	RBMX	RNA-binding motif protein, X chromosome	9	5.47148	5.44654	5.71458	5.80339	5.42222	5.60295	5.46818	5.37026	5.78377	5.45685	5.62045	5.38591	5.77216	5.4837	5.61915	5.53628	5.56971	5.47242
Q6PKG0	LARP1	La-related protein 1	9	5.29327	5.32368	5.50884	5.58516	5.92765	5.53308	5.53753	5.67797	5.56683	5.32051	5.58446	5.34071	5.80686	5.64399	5.69236	5.357	5.71681	5.5833
P53992	SEC24C	Protein transport protein Sec24C	9	5.60924	5.4637	5.41771	5.41767	5.44154	5.37716	5.49323	5.64466	5.60742	5.54025	5.56071	5.59632	5.56104	5.67157	5.71176	5.49397	5.96125	5.43081
Q9NZI8	IGF2BP1	Insulin-like growth factor 2 mRNA-binding protein 1	9	5.61658	5.39476	5.62797	5.55349	5.48936	5.45368	5.50303	5.04402	5.70449	5.28395	6.05252	5.62753	5.87812	5.33938	5.74762	5.28188	5.74018	5.66145
P33993	MCM7	DNA replication licensing factor MCM7	9	4.98646	5.27387	5.86334	5.2834	5.6015	5.2593	5.61046	5.31031	5.69016	5.44992	5.91868	5.52373	5.6703	5.74977	5.96827	5.45784	5.52301	5.85968
Q8N2E2	VWDE	von Willebrand factor D and EGF domain-containing protein	9	5.63866	5.19151	5.54606	5.52844	5.52076	5.85893	5.87171	5.51917	5.94958	5.4152	5.33671	5.43115	5.46726	5.13566	5.84622	5.39132	5.43875	5.9129
P22626	HNRNPA2B1	Heterogeneous nuclear ribonucleoproteins A2/B1	9	5.39454	5.67585	5.54695	5.42944	5.63471	5.59549	5.56986	5.2826	5.39111	5.78416	5.75569	5.8237	5.46088	5.60296	5.55744	5.83078	5.34045	5.3234
Q9NZB2-6	FAM120A	Isoform F of Constitutive coactivator of PPAR-gamma-like protein 1	9	5.66873	5.49043	5.52472	5.5917	5.66901	5.60316	5.66645	5.50075	5.7936	5.64713	5.73488	5.42016	5.36367	5.26138	5.64287	5.09684	5.64683	5.6777
P49821	NDUFV1	NADH dehydrogenase [ubiquinone] flavoprotein 1, mitochondrial	9	5.62589	5.71659	5.72296	5.50039	5.44335	5.49309	5.44071	5.52376	5.69679	5.59183	5.26434	5.51551	5.65927	5.50782	5.45567	5.7527	5.55403	5.5353
Q5UIP0	RIF1	Telomere-associated protein RIF1	9	5.97716	6.11996	5.63003	5.31311	5.03634	5.27597	5.44599	5.5543	5.33177	5.66096	5.72254	5.23344	5.64019	5.66732	5.60315	5.72722	5.46699	5.59355
P14314-2	PRKCSH	Isoform 2 of Glucosidase 2 subunit beta	9	5.50762	5.18168	5.49562	5.59315	5.64545	5.78517	5.59141	5.62253	5.64959	5.80058	5.13637	5.66279	5.6388	5.55637	5.66582	5.58917	5.30596	5.5719
Q92793	CREBBP	CREB-binding protein	9	5.44642	5.35624	5.71003	5.72315	5.27702	5.55467	5.62044	5.36419	5.26233	5.61727	5.88714	5.76772	5.57436	5.48527	5.60969	5.44763	5.63208	5.66436
P42356	PI4KA	Phosphatidylinositol 4-kinase alpha	9	5.25743	5.57035	5.80052	5.28493	5.64751	5.22138	5.4726	5.72716	5.55662	5.80618	5.56211	5.53102	5.22731	5.35892	5.65219	5.71359	5.7813	5.82886
P22570-3	FDXR	Isoform 3 of NADPH:adrenodoxin oxidoreductase, mitochondrial	9	5.459	5.46595	5.66987	5.56777	5.50547	5.55294	5.60291	5.20015	5.6309	5.49725	5.53923	5.62747	5.7593	5.49153	5.63503	5.74923	5.47804	5.56795
Q9UNM6	PSMD13	26S proteasome non-ATPase regulatory subunit 13	9	5.49182	5.51995	5.43908	5.53075	5.79403	5.56569	5.5609	5.48021	5.74527	5.6115	5.58906	5.48146	5.55994	5.39475	5.60685	5.49312	5.75134	5.38428
P48735	IDH2	Isocitrate dehydrogenase [NADP], mitochondrial	9	5.51105	5.4808	5.69184	5.74272	5.71013	5.27778	5.70209	5.90622	5.44231	5.67975	5.48335	5.37853	5.56067	5.2214	5.74136	5.33373	5.70103	5.43526
P31150	GDI1	Rab GDP dissociation inhibitor alpha	9	5.41351	5.56358	5.73132	5.45145	5.32107	5.60209	5.81926	5.67276	5.70717	5.59529	5.59579	5.53348	5.44585	5.32712	5.77369	5.29916	5.55699	5.59041
P49748-3	ACADVL	Isoform 3 of Very long-chain specific acyl-CoA dehydrogenase, mitochondrial	9	5.59909	5.37536	5.58436	5.40087	5.84921	5.67992	5.50545	5.6184	5.52772	5.67487	5.38059	5.37346	5.57905	5.52782	5.79922	5.27978	5.62476	5.62008
P62244	RPS15A	40S ribosomal protein S15a	9	5.58725	5.61104	5.43106	5.58895	5.39803	5.51642	5.40806	5.76846	5.41937	5.63642	5.57295	5.61484	5.40203	5.66818	5.6154	5.64436	5.50759	5.60958
Q13356	PPIL2	RING-type E3 ubiquitin-protein ligase PPIL2	9	5.86407	5.44867	5.5801	5.47484	5.6027	5.59745	5.47603	5.4368	5.63755	5.43838	5.55022	5.52801	5.54672	5.38713	5.64705	5.61334	5.87471	5.29622
Q9BY44	EIF2A	Eukaryotic translation initiation factor 2A	9	5.52313	5.49972	5.73654	5.50974	5.42598	5.89239	5.24022	5.84656	5.56238	5.54961	5.36757	5.66896	5.59168	5.45556	5.51739	5.7236	5.32961	5.55937
P51659	HSD17B4	Peroxisomal multifunctional enzyme type 2	9	5.2671	5.54332	5.31814	5.65904	5.19009	5.28031	5.90683	5.49646	5.48317	5.65356	5.59047	5.71169	5.56085	5.66551	5.44642	5.39991	5.69819	6.12895
Q15398	DLGAP5	Disks large-associated protein 5	9	5.63637	5.51377	5.48774	5.54422	5.49248	5.40017	5.2861	5.34564	5.60759	5.69134	5.7733	5.7124	5.4519	5.50698	5.62075	5.60556	5.58969	5.73399
P11388-4	TOP2A	Isoform 4 of DNA topoisomerase 2-alpha	8	5.73652	5.86748	6.03118	5.44565	5.65659	5.41019	5.8995	5.66234	5.45579	5.91568	5.51328	5.10962	5.56384	4.95026	5.24431	5.43933	5.4612	5.63724
O14981	BTAF1	TATA-binding protein-associated factor 172	8	5.49977	5.39965	5.51312	5.46853	5.49767	6.06046	5.52122	5.62136	5.4935	5.55706	5.38148	5.33753	5.54841	5.51423	5.4779	5.75518	5.71524	5.63768
Q86UP2	KTN1	Kinectin	8	5.65948	5.36043	5.54338	5.62627	5.6098	5.67333	5.44664	5.44474	5.52445	5.55867	5.51549	5.66829	5.5715	5.6168	5.42251	5.48846	5.60129	5.66845
Q13144	EIF2B5	Translation initiation factor eIF-2B subunit epsilon	8	5.61632	5.66015	5.39937	5.51089	5.35853	5.40973	5.59096	5.4875	5.55171	5.5522	5.68025	5.5656	5.5175	5.50241	5.55417	5.5902	5.68364	5.76886
O14497	ARID1A	AT-rich interactive domain-containing protein 1A	8	5.90606	5.75355	5.58148	5.60959	5.58717	5.67552	5.30979	5.55767	5.62259	5.45076	5.65305	5.62361	5.32138	5.38757	5.50616	5.39832	5.63076	5.42495
Q9Y230	RUVBL2	RuvB-like 2	8	5.65272	5.52904	5.4281	5.55336	5.74121	5.54186	5.60729	5.74728	5.71749	5.44394	5.44837	5.58354	5.59871	5.31635	5.47753	5.49028	5.49525	5.62769
P49327	FASN	Fatty acid synthase	8	5.73115	5.72982	5.44972	5.36479	5.74478	6.00891	5.7674	5.45323	5.43975	5.49687	5.54445	5.38708	5.54937	5.51253	5.69926	5.40711	5.44206	5.27172
O95071	UBR5	E3 ubiquitin-protein ligase UBR5	8	5.56102	5.46667	5.81842	5.67884	5.39805	5.33755	5.47472	5.56804	5.82646	5.47564	5.5768	5.47512	5.55371	5.42021	5.50484	5.60573	5.50386	5.75431
Q86WJ1	CHD1L	Chromodomain-helicase-DNA-binding protein 1-like	8	5.52145	5.4809	5.32672	5.71939	5.63004	5.50021	5.52421	5.53402	5.37413	5.6802	5.71808	5.65576	5.48629	5.67631	5.44242	5.53257	5.62976	5.56753
Q7LBC6	KDM3B	Lysine-specific demethylase 3B	8	5.33543	5.58819	5.80635	5.46717	5.64911	5.85428	5.38311	5.44077	5.50991	5.40194	5.39261	5.43211	5.61188	5.63091	5.61086	5.54753	5.60604	5.73179
P00491	PNP	Purine nucleoside phosphorylase	8	5.59662	6.01814	5.47292	5.64739	5.52463	5.58542	5.29242	5.80972	5.33756	5.72837	5.34204	5.5874	5.37915	5.5211	5.52887	5.66268	5.50534	5.46022
P54132	BLM	Bloom syndrome protein	8	5.16006	5.76654	5.17395	5.62067	5.81605	5.21587	5.64391	5.65455	5.50505	5.65189	5.59635	5.51224	5.71334	5.39335	5.95533	5.54527	5.4462	5.6294
Q15370	ELOB	Elongin-B	8	5.86779	5.58084	5.36729	6.14434	5.91715	5.86831	5.59345	5.56314	5.51738	5.25723	5.40088	5.51634	5.27553	5.41228	5.16698	5.57132	5.24445	5.73531
P50502	ST13	Hsc70-interacting protein	8	5.7205	5.51739	5.97103	5.41997	5.75189	5.80511	5.602	5.43305	5.47283	5.3466	5.47902	5.35782	5.68209	5.48602	5.69996	5.41812	5.34108	5.49554
Q2VIR3	EIF2S3B	Eukaryotic translation initiation factor 2 subunit 3B	8	5.569	5.38355	5.29572	5.62717	5.33449	5.49971	5.50903	5.71488	5.36551	5.50782	5.80503	5.74562	5.48379	5.70537	5.47079	5.50264	5.87348	5.6064
Q9UBT2	UBA2	SUMO-activating enzyme subunit 2	8	5.88364	5.71512	5.6015	5.37881	5.66796	5.8552	5.81661	5.45809	5.49875	5.74866	5.12844	5.23122	5.61716	5.35915	5.45647	5.55351	5.62281	5.40692
P78559-2	MAP1A	Isoform 2 of Microtubule-associated protein 1A	8	5.71771	5.65181	5.73896	5.32	5.61834	5.51507	5.56543	5.02656	5.45873	5.62921	5.73301	5.62237	5.81626	5.61174	5.59628	5.55457	5.63086	5.1931
Q9UHP3-3	USP25	Isoform USP25m of Ubiquitin carboxyl-terminal hydrolase 25	8	5.01432	5.56883	5.98038	5.30423	5.20837	5.64157	5.72282	5.38292	5.82974	5.18481	5.7549	5.5224	5.40706	5.50472	5.52383	5.94809	5.73524	5.76576
Q5VT06	CEP350	Centrosome-associated protein 350	8	5.55382	5.6037	5.72996	5.49939	5.45015	5.39966	5.57375	5.56801	5.58537	5.62716	5.56887	5.6549	5.6426	5.48803	5.52694	5.52094	5.39778	5.60897
Q9Y2W1	THRAP3	Thyroid hormone receptor-associated protein 3	8	5.53988	5.30414	5.5443	5.71456	5.67184	5.61295	5.44452	5.72782	5.50685	5.43136	5.44727	5.29287	5.63919	5.5171	5.70891	5.65343	5.55643	5.68657
Q9NVI7	ATAD3A	ATPase family AAA domain-containing protein 3A	8	5.57242	5.37543	5.59934	5.53181	5.54734	5.3059	5.60415	5.39804	5.77437	5.45387	5.56375	5.47651	5.83234	5.28316	5.77154	5.53827	5.72201	5.64975
Q5T9A4	ATAD3B	ATPase family AAA domain-containing protein 3B	8	5.52664	5.54317	5.8461	5.43652	5.53084	5.51343	5.44859	5.75597	5.64035	5.61872	5.40678	5.61576	5.43413	5.59202	5.68983	5.36289	5.47307	5.56518
P11277-2	SPTB	Isoform 2 of Spectrin beta chain, erythrocytic	8	5.64728	5.42168	5.4472	5.74024	5.84663	5.49418	5.62334	5.83602	5.70453	5.25241	5.60367	5.52261	5.70888	5.38136	5.40519	5.32867	5.47385	5.56225
Q9H089	LSG1	Large subunit GTPase 1 homolog	8	6.16151	5.41445	5.16576	5.67484	5.50645	5.42357	5.45901	5.40939	5.89316	5.52248	5.68807	5.57287	5.51555	5.46546	5.30878	5.51756	5.83192	5.46917
Q9Y6A5	TACC3	Transforming acidic coiled-coil-containing protein 3	8	5.63749	5.44498	5.37113	5.57255	5.60901	5.2055	5.46237	5.9063	5.58984	5.38394	5.68063	5.34973	5.85583	5.54412	5.32033	5.51024	5.77521	5.7808
Q6P2E9	EDC4	Enhancer of mRNA-decapping protein 4	8	5.63371	5.44571	5.42357	5.45491	5.41829	5.69494	5.57978	5.55349	5.62688	5.4875	5.617	5.64766	5.44341	5.49651	5.68617	5.62274	5.5959	5.57182
Q96SN8-2	CDK5RAP2	Isoform 2 of CDK5 regulatory subunit-associated protein 2	8	5.55245	5.4236	5.623	5.406	5.99525	5.84622	5.41022	5.76066	5.44081	5.44922	5.35214	5.6384	5.44012	5.4941	5.57595	5.35778	5.57167	5.6624
Q8IWI9	MGA	MAX gene-associated protein	8	5.71246	5.61646	5.54293	5.47043	5.59168	5.78727	5.47625	5.62105	5.37467	5.54298	5.34915	5.37414	5.67193	5.44236	5.5889	5.70738	5.52638	5.60358
Q96SB4-3	SRPK1	Isoform 1 of SRSF protein kinase 1	8	5.37482	5.49119	5.37781	5.66112	5.27745	5.28276	5.58113	5.49955	5.58262	5.43826	5.72753	5.80357	5.43985	5.54371	5.80109	5.37273	5.92925	5.81556
P13639	EEF2	Elongation factor 2	8	6.3478	6.7512	8.01038	7.56512	6.81198	5.05023	5.0098	4.91257	4.55702	4.83277	4.58515	4.8052	4.73965	6.97107	5.04803	4.8643	4.56804	4.56968
Q9BQG0-2	MYBBP1A	Isoform 2 of Myb-binding protein 1A	8	5.4904	5.71426	5.64411	5.55662	5.76956	5.40571	5.50203	5.46661	5.58031	5.65179	5.64253	5.62648	5.84089	5.39745	5.5318	5.40599	5.4504	5.32306
Q9Y224	RTRAF	RNA transcription, translation and transport factor protein	8	5.17351	5.39847	5.48985	5.75359	5.63377	5.42913	5.66709	5.98116	5.54671	5.50953	5.2757	5.51701	5.5554	5.64464	5.48413	5.81209	5.51908	5.60914
A0A7I2YQ88	PABPC1	Poly(A) binding protein, cytoplasmic 1, isoform CRA_e	8	4.48701	5.88709	5.95153	5.8665	5.83385	5.05444	5.30445	5.14187	5.29071	5.27396	5.7783	5.55158	5.4896	6.78342	6.05647	5.37946	5.19684	5.67293
P62136	PPP1CA	Serine/threonine-protein phosphatase PP1-alpha catalytic subunit	8	5.64992	5.33748	5.55074	5.61875	5.80234	5.80464	5.50167	5.41875	5.60258	5.41561	5.86768	5.59558	5.46796	5.37038	5.51397	5.58282	5.55117	5.34796
Q02224	CENPE	Centromere-associated protein E	8	5.40765	5.3679	5.56412	5.42927	5.33203	5.35527	5.58929	5.17544	5.56848	5.4163	5.81893	5.73276	5.37467	5.66108	5.79278	5.69891	5.7285	5.98661
Q9Y5L0-1	TNPO3	Isoform 1 of Transportin-3	8	5.4108	6.10138	5.54622	5.77049	5.53116	5.48844	5.61808	5.66946	5.49369	5.4937	5.43609	5.51878	5.47859	5.65369	5.24095	5.94908	5.31803	5.28138
Q13439-5	GOLGA4	Isoform 5 of Golgin subfamily A member 4	8	5.67269	5.25112	5.69789	5.56083	5.76176	5.51154	5.64274	5.39566	5.73411	5.21075	5.64888	5.51995	5.80951	5.08577	5.58279	5.37895	6.1365	5.39855
P60900	PSMA6	Proteasome subunit alpha type-6	8	5.66017	5.59516	5.63956	5.33189	5.70296	5.45457	5.78419	4.97394	5.65893	5.47188	5.57709	5.33048	5.86162	6.11974	5.85198	5.52161	5.39887	5.06534
Q6UWE0	LRSAM1	E3 ubiquitin-protein ligase LRSAM1	8	5.48914	5.50595	5.7233	5.51277	5.39694	5.32834	5.57274	5.61431	5.68532	5.39608	5.61172	5.45097	5.54238	5.45621	5.62725	5.62155	5.72253	5.74252
Q15907	RAB11B	Ras-related protein Rab-11B	8	5.47406	5.59475	5.5956	5.42469	5.44013	5.49182	5.50089	5.65809	5.55295	5.70028	5.45371	5.55352	5.46235	5.61946	5.47856	5.6844	5.41228	5.90246
O75533	SF3B1	Splicing factor 3B subunit 1	8	5.47806	5.54897	5.59022	5.74988	5.36838	5.53339	5.47079	5.33994	5.8412	5.64024	5.58318	5.53507	5.41603	5.35595	5.55367	5.33711	5.9278	5.73013
O43242	PSMD3	26S proteasome non-ATPase regulatory subunit 3	8	5.54341	5.61897	5.67597	5.46599	5.89676	5.64476	5.63205	5.6203	5.88211	5.23349	5.25411	5.4266	5.49332	5.42778	5.61416	5.48725	5.68146	5.40147
P62826	RAN	GTP-binding nuclear protein Ran	8	6.0068	5.4434	5.38903	5.56963	5.80073	5.40674	5.61204	5.61821	5.67051	5.62456	5.67342	5.48472	5.50233	5.31655	5.52565	5.33572	5.80714	5.21279
O60216	RAD21	Double-strand-break repair protein rad21 homolog	8	5.61519	5.33555	5.62271	5.62585	5.44364	5.31886	5.47701	5.73182	5.3579	5.38271	5.57935	5.34483	5.67893	5.66208	5.8757	5.48069	5.64933	5.81785
P33991	MCM4	DNA replication licensing factor MCM4	8	5.55032	5.50324	5.60933	5.60966	5.57818	5.41046	5.60131	5.6043	5.74018	5.56488	5.75123	5.41981	5.61632	5.38296	5.52418	5.36166	5.72781	5.44416
Q9UQB8	BAIAP2	Brain-specific angiogenesis inhibitor 1-associated protein 2	8	5.5544	5.15695	6.10686	5.53701	5.58232	5.29787	5.68503	5.39057	6.27134	5.377	5.692	5.25189	5.21665	5.09337	5.29029	5.95291	5.70336	5.84018
O95239	KIF4A	Chromosome-associated kinesin KIF4A	8	6.21046	5.99159	5.92876	5.74892	5.70134	5.58595	5.53188	5.86733	5.40677	5.54464	5.3009	5.34954	5.52258	5.66288	5.33606	5.36173	5.11989	4.82879
Q12789	GTF3C1	General transcription factor 3C polypeptide 1	8	5.60234	5.85932	5.53247	5.72923	5.34739	5.58772	5.46509	5.69955	5.27671	5.89345	5.57921	5.71974	5.41226	5.67406	5.40972	5.21046	5.59337	5.4079
Q9HAV4	XPO5	Exportin-5	8	5.77413	5.61855	5.70824	5.38256	5.84423	5.17339	5.41027	5.62252	5.6579	5.26276	5.45627	5.2433	5.89538	5.27708	5.57059	5.64281	5.59308	5.86694
Q12769	NUP160	Nuclear pore complex protein Nup160	8	5.71584	5.49586	5.58893	5.58025	5.34589	5.50188	5.59257	5.60977	5.5513	5.65478	5.64029	5.54153	5.49055	5.45129	5.49074	5.66977	5.58129	5.49748
Q9UNE7	STUB1	E3 ubiquitin-protein ligase CHIP	8	5.43782	5.73568	5.52639	5.50125	5.85746	5.70201	5.70289	5.25041	5.66972	5.54792	5.46792	5.64372	5.74707	5.64267	5.53939	5.65411	5.31674	5.05681
O94915	FRYL	Protein furry homolog-like	8	5.41836	5.3362	5.52588	5.71782	5.45524	5.59685	5.6395	5.64197	5.68332	5.46544	5.41719	5.49364	5.64089	5.49463	5.66276	5.5993	5.5569	5.6541
Q9UJV9	DDX41	Probable ATP-dependent RNA helicase DDX41	8	5.659	5.34539	5.57674	5.42891	5.49201	5.46086	5.62962	5.35067	5.57935	5.32813	5.80159	5.43258	5.48186	5.33098	5.70469	5.50467	6.14326	5.74968
Q9UHB9	SRP68	Signal recognition particle subunit SRP68	8	5.50785	5.74922	5.40512	5.46473	5.16573	5.52202	5.54496	5.67299	5.25905	5.68136	5.56754	5.68622	5.58357	5.66903	5.43252	5.76632	5.59673	5.72506
P51948	MNAT1	CDK-activating kinase assembly factor MAT1	8	4.22962	6.53344	5.39883	4.83521	6.15436	5.32231	6.00106	3.49667	5.33607	5.95911	6.37872	7.51059	6.41667	6.96944	4.71528	6.22442	4.5948	3.92339
Q6Y7W6-3	GIGYF2	Isoform 2 of GRB10-interacting GYF protein 2	8	5.52197	5.49195	5.52368	5.5415	5.17193	4.74061	5.62178	5.64356	5.50435	5.4953	5.91193	5.67629	5.44426	5.65243	5.40911	5.39298	6.69059	5.56576
Q13618	CUL3	Cullin-3	8	5.62604	5.47759	5.92583	5.6205	5.326	5.42209	5.73083	5.28731	5.70223	5.30325	5.66657	5.49592	5.73483	5.46582	5.14311	5.58084	5.84059	5.65065
P10155	RO60	60 kDa SS-A/Ro ribonucleoprotein	8	5.17763	5.49541	5.56403	5.61224	5.48989	5.58734	5.48987	5.45027	5.46276	5.60802	5.51888	5.82225	5.54822	5.72613	5.44958	5.89201	5.55838	5.5471
Q14C86-6	GAPVD1	Isoform 6 of GTPase-activating protein and VPS9 domain-containing protein 1	8	5.70372	5.49647	5.5987	5.33161	5.5965	5.49582	5.63229	5.73244	5.76253	5.2884	5.40988	5.33311	5.83913	5.49632	5.42917	5.40245	5.91122	5.54023
Q16891	IMMT	MICOS complex subunit MIC60	8	5.28214	5.52068	5.57522	5.59677	5.55075	5.748	5.5913	5.61164	5.24625	5.62003	5.68322	5.81028	5.48845	5.7262	5.59022	5.43522	5.43108	5.49255
P34913	EPHX2	Bifunctional epoxide hydrolase 2	8	5.85327	5.19802	5.75297	5.56535	5.3063	5.50356	5.49653	5.54704	5.2771	5.74954	5.69355	5.44911	5.58652	5.4337	5.55244	5.66359	5.78371	5.58768
Q6W2J9	BCOR	BCL-6 corepressor	8	5.24474	5.52672	5.46848	5.41795	5.38066	5.47302	5.5725	4.87867	5.51656	5.68569	5.76126	5.86397	5.68012	5.94759	5.79903	6.14701	5.59842	5.03761
P45983-4	MAPK8	Isoform 4 of Mitogen-activated protein kinase 8	8	5.54044	5.71032	5.40308	5.5637	5.3776	5.31644	5.46513	5.67424	5.56538	5.29308	5.5932	5.63005	5.68823	5.57506	5.91584	5.52408	5.72372	5.4404
G3V1L9	TJP1	Tight junction protein ZO-1	8	5.60494	5.50754	5.77817	5.69874	5.83133	5.16125	5.63774	5.2881	5.49071	5.60533	5.90319	5.61214	5.69802	5.41515	5.81491	5.30278	5.51479	5.13516
Q5VZ89-7	DENND4C	Isoform 2 of DENN domain-containing protein 4C	8	5.50425	5.60928	5.76959	5.5163	5.47867	5.55411	5.553	5.65194	5.74297	5.51051	5.59564	5.48848	5.32798	5.38712	5.28417	5.45915	5.75539	5.81147
P78347	GTF2I	General transcription factor II-I	8	5.68432	5.3578	5.45271	5.30757	5.80376	5.53674	5.69934	5.5215	5.81829	5.53747	5.56289	5.26793	5.71076	5.45895	5.57428	5.55967	5.81912	5.3269
Q15021	NCAPD2	Condensin complex subunit 1	8	5.48185	5.76906	5.59771	5.70985	5.64914	5.26932	5.53298	5.45645	5.48294	5.63932	5.48459	5.77119	5.591	5.75124	5.42952	5.52299	5.52525	5.33559
Q8N7H5	PAF1	RNA polymerase II-associated factor 1 homolog	8	5.28189	6.24986	5.28745	5.83049	5.64233	6.03112	5.64847	5.81861	5.07288	5.65297	5.17818	5.77643	5.37749	6.01215	5.13834	5.78084	4.8587	5.36178
P04792	HSPB1	Heat shock protein beta-1	8	4.19593	6.13887	5.41648	4.83693	5.92302	5.0165	6.09264	5.12347	5.39437	5.65694	6.17503	6.36523	6.16264	6.32341	5.15816	5.78959	4.97075	5.26005
O00567	NOP56	Nucleolar protein 56	8	5.66784	5.94149	5.38857	5.6653	5.74536	5.65596	5.59078	6.00901	5.58248	5.58204	5.38385	5.27777	5.44202	5.46315	5.53827	5.5207	5.46653	5.07889
Q9UIW2	PLXNA1	Plexin-A1	8	5.36539	5.59688	5.79504	5.60162	5.49602	5.30906	5.80345	5.41893	5.73764	5.39708	5.80795	5.62417	5.25851	5.36341	5.55548	5.52515	5.69667	5.64755
P78406	RAE1	mRNA export factor	8	5.09787	5.95664	5.31893	5.44515	5.92458	5.61405	5.72483	5.06426	5.56478	5.87241	5.8252	6.06303	5.59113	5.68058	5.30547	5.70585	5.26764	4.97759
Q96T88-2	UHRF1	Isoform 2 of E3 ubiquitin-protein ligase UHRF1	8	5.6497	5.01686	5.86285	5.35512	5.45142	5.66872	5.54075	5.28325	5.62948	5.49554	5.85922	5.71822	5.86128	5.53637	5.29672	5.81025	5.58461	5.37965
O75475	PSIP1	PC4 and SFRS1-interacting protein	8	5.63745	5.33778	5.31255	5.39078	5.49341	5.47613	5.78279	5.41338	5.68906	5.93936	5.60125	5.24537	5.63503	5.07119	5.82655	5.52504	5.80925	5.81362
O75165	DNAJC13	DnaJ homolog subfamily C member 13	8	5.65189	5.62334	5.73072	5.52046	5.51567	5.78218	5.56824	5.54834	5.4856	5.67292	5.47705	5.56681	5.55566	5.23489	5.31321	5.51432	5.45028	5.78842
Q99986	VRK1	Serine/threonine-protein kinase VRK1	8	5.60226	5.66481	5.61479	5.3062	5.52788	5.59374	5.43338	5.57789	5.62471	5.53418	5.54038	5.52312	5.61014	5.47934	5.65414	5.44587	5.60587	5.66128
P22695	UQCRC2	Cytochrome b-c1 complex subunit 2, mitochondrial	8	5.3126	5.52693	5.24964	5.46683	5.52338	5.63933	5.5485	5.56891	5.52158	5.71781	5.19168	5.83197	5.67276	6.1387	5.50387	5.66564	5.28024	5.63963
Q13162	PRDX4	Peroxiredoxin-4	8	5.5124	5.4604	5.50623	5.65904	5.58974	6.00335	5.53537	5.7536	5.45793	5.73812	5.00955	5.50331	5.69614	5.80887	5.33252	5.77757	5.01865	5.6372
P21359	NF1	Neurofibromin	8	5.48315	5.70298	5.44632	5.63962	5.54666	5.47265	5.52263	5.81761	5.46231	5.55959	5.85903	5.47976	5.63157	5.47132	5.48182	5.61882	5.50104	5.30312
P54687-5	BCAT1	Isoform 5 of Branched-chain-amino-acid aminotransferase, cytosolic	8	5.76739	5.58861	5.58144	5.73218	5.74257	5.42837	5.45701	5.59827	5.36316	5.42411	5.5934	5.46907	5.39424	5.37274	5.81683	5.44412	5.48509	5.74141
Q8WXG6	MADD	MAP kinase-activating death domain protein	8	5.67952	5.57646	5.68758	5.49972	5.40418	5.21617	5.66176	5.62657	5.80902	5.44016	5.51712	5.3171	5.53539	5.55997	5.69929	5.56224	5.67589	5.53185
O75534-4	CSDE1	Isoform 4 of Cold shock domain-containing protein E1	8	5.42161	5.36877	5.53626	5.52951	5.2499	5.45853	5.40472	5.66493	5.39062	5.68591	5.6889	5.79404	5.45077	5.82019	5.78718	5.54551	5.51052	5.69214
Q6S8J3	POTEE	POTE ankyrin domain family member E	8	5.59773	5.79606	5.57658	5.36877	5.74748	5.38124	5.98577	5.45138	5.73032	5.212	5.9827	5.62839	5.22184	5.22696	5.5981	5.4471	5.64799	5.39957
Q9H2U1	DHX36	ATP-dependent DNA/RNA helicase DHX36	8	6.02511	5.75126	5.32719	5.67701	5.75721	5.80382	5.63852	5.64875	5.43055	5.64155	5.39442	5.28626	5.32691	5.42059	5.43216	5.51239	5.59705	5.32925
Q96T76-8	MMS19	Isoform 5 of MMS19 nucleotide excision repair protein homolog	8	5.60722	5.56027	5.67075	5.46872	5.54283	5.38541	5.59386	5.3259	5.69824	5.61429	5.56538	5.49323	5.70282	5.21128	5.68914	5.47052	5.90316	5.49697
P23528	CFL1	Cofilin-1	8	5.33822	5.46018	5.67251	5.31109	5.74407	5.52974	5.7896	5.32453	5.66796	5.51717	5.71566	5.74605	5.77603	5.34307	5.42858	5.76506	5.46293	5.40754
Q15738	NSDHL	Sterol-4-alpha-carboxylate 3-dehydrogenase, decarboxylating	8	5.66721	5.35569	5.7204	5.35107	5.92559	5.52044	5.58493	5.74141	5.77461	5.1858	5.53748	5.21995	5.79656	5.53613	5.68526	5.56933	5.55637	5.27175
Q5T5C0	STXBP5	Syntaxin-binding protein 5	8	5.63008	6.25626	5.58835	5.95503	5.635	5.9169	5.52744	5.97497	5.47014	5.76183	5.13677	5.68754	5.14888	5.82876	5.2622	5.52309	4.72386	4.9729
Q12792-3	TWF1	Isoform 3 of Twinfilin-1	8	5.44949	5.62445	5.6071	5.47602	5.57639	5.47047	5.53762	5.50904	5.8141	5.58077	5.4884	5.5863	5.35247	5.24629	5.83133	5.52489	5.59988	5.725
P09884	POLA1	DNA polymerase alpha catalytic subunit	8	5.60023	5.47363	5.62078	5.64451	5.3367	5.32063	5.36703	5.49019	5.6208	5.73264	5.53232	5.69168	5.35855	5.61492	5.57754	5.56538	5.59504	5.85743
P49916	LIG3	DNA ligase 3	8	5.25811	5.63842	5.49849	5.71204	5.30826	5.59087	5.6759	5.44196	5.58716	5.70342	5.46514	5.48675	5.73506	5.49605	5.4973	5.70389	5.54388	5.6573
Q9UKV3	ACIN1	Apoptotic chromatin condensation inducer in the nucleus	8	5.73107	5.6631	5.36357	5.43959	5.56552	5.70264	5.69599	5.50938	5.40786	5.47836	5.54469	5.454	5.71349	5.38988	5.57406	5.80167	5.4924	5.47272
P09429	HMGB1	High mobility group protein B1	8	5.64059	5.81052	5.96471	5.4398	5.75989	5.71221	5.4967	5.48568	5.65751	5.42413	5.74339	5.06728	5.75426	5.79342	5.46502	5.26916	5.35774	5.15797
Q14997	PSME4	Proteasome activator complex subunit 4	8	5.67227	5.20417	5.33575	5.51731	5.83167	5.17727	5.74583	5.5371	5.75277	5.44551	5.6387	5.50311	5.60899	5.82064	5.48162	5.27494	5.84611	5.60626
O75150	RNF40	E3 ubiquitin-protein ligase BRE1B	8	5.6013	5.30806	5.83558	5.50134	5.4583	5.30173	5.63805	5.58569	5.7581	5.44913	5.65281	5.4727	5.55931	5.3106	5.46842	5.45392	5.99861	5.64634
O00410-3	IPO5	Isoform 3 of Importin-5	8	5.56355	5.41484	5.56782	5.60153	5.22818	5.21623	5.41856	5.7692	5.46563	5.4813	5.66234	5.7378	5.32671	5.58901	5.75878	5.74021	5.46128	5.99701
P49790-3	NUP153	Isoform 3 of Nuclear pore complex protein Nup153	8	5.46287	5.81575	5.48854	5.58081	5.617	5.52808	5.28175	5.67552	5.32695	5.77351	5.44366	5.4814	5.76698	5.85538	5.47287	5.71959	5.3618	5.34753
Q8TAG9	EXOC6	Exocyst complex component 6	8	5.50901	5.45218	5.7043	5.64732	5.61408	5.45163	5.38806	5.48094	5.55227	5.46956	5.52708	5.58893	5.51438	5.56638	5.66806	5.28284	5.77734	5.80565
Q6ZT12	UBR3	E3 ubiquitin-protein ligase UBR3	8	5.26488	5.74272	5.5127	5.4553	5.31772	5.47586	5.61327	5.36448	5.48888	5.70996	5.6603	5.52368	5.41619	5.65737	5.52599	5.57607	5.89123	5.80339
O60333-4	KIF1B	Isoform 4 of Kinesin-like protein KIF1B	8	5.3643	5.49841	5.74144	5.60754	5.50599	5.47274	5.39742	5.71811	5.52103	5.37782	5.5287	5.52641	5.68059	5.41498	5.89546	5.5149	5.55281	5.68136
P04083	ANXA1	Annexin A1	8	5.65527	5.3097	6.08443	5.55308	5.44723	5.65285	5.82566	5.70393	5.18587	5.48877	5.70734	5.55839	5.39331	5.48716	5.49882	5.56749	5.32402	5.55667
Q9NV66	TYW1	S-adenosyl-L-methionine-dependent tRNA 4-demethylwyosine synthase TYW1	8	5.50558	5.40601	5.47721	5.36913	5.56799	5.62926	5.66834	5.68873	5.64625	5.45682	5.53181	5.33561	5.74818	5.36312	5.55623	5.59603	5.92276	5.53094
Q9H0P0	NT5C3A	Cytosolic 5'-nucleotidase 3A	8	5.50254	5.86574	5.36485	5.35675	5.47022	5.64219	5.57589	5.57918	5.40163	5.58833	5.55144	5.67608	5.59095	5.71621	5.56917	5.72798	5.38501	5.43583
Q15645	TRIP13	Pachytene checkpoint protein 2 homolog	8	5.50652	5.2604	5.66066	5.62345	5.29785	5.39011	5.54606	5.54413	5.91235	5.62452	5.69009	5.53699	5.57752	5.54304	5.53177	5.57299	5.55199	5.62955
Q92766-2	RREB1	Isoform 2 of Ras-responsive element-binding protein 1	8	5.4891	5.21952	5.7008	5.46417	5.65662	5.53143	5.8264	5.52238	5.56911	5.64598	5.72568	5.48649	5.54061	5.2747	5.57695	5.59888	5.55206	5.61912
P24928	POLR2A	DNA-directed RNA polymerase II subunit RPB1	8	5.398	5.96613	5.31407	5.58524	5.67143	5.26136	5.38112	5.47995	5.36843	5.71532	5.87149	5.68859	5.59518	5.75134	5.59849	5.65341	5.19236	5.50808
P52732	KIF11	Kinesin-like protein KIF11	8	5.50402	5.40048	5.79528	5.56031	5.69931	5.53121	5.5324	5.55702	5.66781	5.39051	5.66364	5.43057	5.41133	5.29894	5.58049	5.58618	5.58189	5.80863
Q92598	HSPH1	Heat shock protein 105 kDa	8	5.52758	5.5345	5.64673	5.90932	5.56915	5.51683	5.22395	5.23038	5.58031	5.50199	5.58442	5.73654	5.39022	5.48977	5.70614	5.30979	5.65433	5.88805
Q14254	FLOT2	Flotillin-2	8	5.7094	5.69965	5.86842	5.38693	5.45646	5.64776	5.83828	5.4891	5.56081	5.27195	5.4742	5.34831	5.62033	5.30961	5.62759	5.76454	5.43587	5.49079
Q15435	PPP1R7	Protein phosphatase 1 regulatory subunit 7	8	5.23122	5.59152	5.45596	5.67184	5.52653	5.73129	5.50007	5.46891	5.4515	5.52082	5.50419	5.60748	5.54761	5.82311	5.50736	5.68162	5.29742	5.88156
Q8TC07	TBC1D15	TBC1 domain family member 15	8	5.27745	5.6148	5.64162	5.75362	5.47651	5.72341	5.56766	5.45016	5.77363	5.55979	5.46215	5.79784	5.44467	5.34715	5.45465	5.32041	5.7506	5.58387
P60174-3	TPI1	Isoform 2 of Triosephosphate isomerase	8	6.38201	5.83475	5.52418	5.59961	5.54194	5.96588	5.43959	5.47583	5.42789	5.67647	5.56902	5.46229	5.16875	5.80734	5.35644	5.18645	5.25754	5.32403
P28340	POLD1	DNA polymerase delta catalytic subunit	8	5.43703	6.17451	5.85723	6.18399	5.75569	5.64261	5.33511	5.53751	5.44384	5.61632	5.24362	5.39949	5.37864	5.14302	5.66009	4.94142	5.56263	5.68723
Q9NXE4-4	SMPD4	Isoform 4 of Sphingomyelin phosphodiesterase 4	8	5.31433	5.50593	5.41338	5.54611	5.46172	5.58675	5.5258	5.54284	5.54158	5.62545	5.78437	5.7195	5.37924	5.49602	5.40829	5.49667	5.74952	5.9025
O14744	PRMT5	Protein arginine N-methyltransferase 5	8	5.64074	5.42298	5.76041	5.65921	5.72015	5.29909	5.77725	5.53015	5.89457	5.42823	5.3309	5.27048	5.55141	5.58525	5.62144	5.44864	5.66577	5.39333
Q9H9G7	AGO3	Protein argonaute-3	8	5.7886	5.60369	5.4948	5.41499	5.58182	5.52181	5.62083	5.60956	5.67549	5.52322	5.30859	5.53281	5.49302	5.3079	5.41455	5.66587	5.60278	5.83966
O60828	PQBP1	Polyglutamine-binding protein 1	8	5.54783	5.46172	5.38389	5.4848	5.56475	5.29698	5.25029	5.41113	5.49318	5.64919	5.35637	5.90693	5.62676	5.76074	5.67265	5.65901	5.64061	5.83316
O95155-4	UBE4B	Isoform 4 of Ubiquitin conjugation factor E4 B	8	5.5677	5.43149	5.51606	5.95806	5.26469	5.64835	5.41434	5.49656	5.68462	5.75078	5.49108	5.68664	5.50435	5.50432	5.40444	5.42546	5.77272	5.47835
Q96AX1	VPS33A	Vacuolar protein sorting-associated protein 33A	8	5.30992	5.51989	5.60245	5.58241	5.55064	5.45937	5.56794	5.74331	5.54235	5.3724	5.48452	5.65397	5.53062	5.59599	5.59593	5.52942	5.64774	5.71114
P42345	MTOR	Serine/threonine-protein kinase mTOR	8	5.45933	5.51435	5.92325	5.84945	5.48709	5.39984	5.81296	5.36647	5.52755	5.41046	5.80804	5.40809	5.68918	5.33499	5.63385	5.13915	5.72623	5.50973
Q15057	ACAP2	Arf-GAP with coiled-coil, ANK repeat and PH domain-containing protein 2	8	5.25376	5.79696	6.55975	5.28093	6.20418	5.95816	6.18494	5.31161	5.5108	5.26629	5.40529	5.14416	5.21598	5.11018	5.22604	5.45153	5.52263	5.59681
Q9UIF9	BAZ2A	Bromodomain adjacent to zinc finger domain protein 2A	8	5.7886	5.70546	5.3875	5.41886	5.57468	5.49608	5.39151	5.5035	5.74099	5.70085	5.31627	5.7187	5.85624	5.34735	5.34171	5.56548	5.84606	5.30017
Q8NBF2	NHLRC2	NHL repeat-containing protein 2	8	5.55011	5.27825	5.63435	5.59767	5.61694	5.50722	5.86455	5.44361	5.67546	5.45465	5.7363	5.37552	5.6663	5.22949	5.65079	5.47856	5.72953	5.5107
P31942	HNRNPH3	Heterogeneous nuclear ribonucleoprotein H3	8	5.46333	5.68702	5.92948	5.34396	5.88953	5.28074	5.9364	4.77647	5.88649	5.38048	6.01677	5.51174	5.66696	5.43466	5.80923	5.26562	5.79534	4.92577
Q15061	WDR43	WD repeat-containing protein 43	8	5.775	5.66472	5.84356	5.86094	5.82544	5.72635	6.00314	4.87156	5.63539	5.84719	5.63268	5.53272	5.61873	5.83847	5.54895	4.77632	4.81913	5.17972
P21281	ATP6V1B2	V-type proton ATPase subunit B, brain isoform	8	5.15657	5.9913	5.52405	5.46562	5.62499	5.64614	5.60293	5.33117	5.50872	5.66308	5.7812	5.53999	5.71479	5.50113	5.74333	5.68665	5.19761	5.32074
P42166	TMPO	Lamina-associated polypeptide 2, isoform alpha	8	5.22744	5.56614	5.49943	5.66839	5.88505	5.55693	5.70194	5.58111	5.68007	5.40015	5.39448	5.42557	5.72777	5.33837	5.63095	5.44469	5.68161	5.58992
P61978-2	HNRNPK	Isoform 2 of Heterogeneous nuclear ribonucleoprotein K	8	4.95887	5.36531	5.13525	5.14739	5.21518	5.42361	5.46358	5.29637	8.84189	5.57325	5.39297	5.1398	5.31558	5.60414	5.09657	5.37168	5.53902	6.11953
Q9NRR4	DROSHA	Ribonuclease 3	8	5.38415	5.4074	5.39811	5.34112	5.53489	5.95569	5.80092	5.60636	5.59821	5.51668	5.54237	5.54936	5.39832	5.26015	5.65138	5.82795	5.69435	5.53259
Q5SW79	CEP170	Centrosomal protein of 170 kDa	8	4.81738	6.03631	5.50298	6.049	5.73911	6.10848	5.75147	6.11542	5.52992	5.69122	5.25913	5.41677	5.15512	5.67517	5.16015	5.68585	5.15682	5.14971
O14920	IKBKB	Inhibitor of nuclear factor kappa-B kinase subunit beta	8	5.33765	5.36037	5.24221	5.56367	5.4508	5.87428	5.64285	5.77564	5.59255	5.65104	5.2048	5.77956	5.44652	5.37627	5.52221	5.96859	5.52792	5.68307
Q9Y446-2	PKP3	Isoform PKP3b of Plakophilin-3	8	5.24166	5.62086	5.61542	5.74468	5.52484	5.79409	5.53412	5.62764	5.69829	5.57352	5.30422	5.41732	5.46957	5.50893	5.37297	5.55296	5.60302	5.7959
O00161	SNAP23	Synaptosomal-associated protein 23	8	5.80133	5.13422	5.7994	5.46463	5.41726	5.69731	5.56799	5.41428	5.49975	5.34092	5.88451	5.68113	5.33258	5.12536	5.39268	5.51707	5.94515	5.9844
P26196	DDX6	Probable ATP-dependent RNA helicase DDX6	8	5.41649	5.63072	5.50787	5.74978	5.08956	5.39224	5.74447	5.71777	5.59352	5.40084	5.32316	5.52846	5.58176	5.68412	5.61732	5.63689	5.73823	5.6468
Q4J6C6	PREPL	Prolyl endopeptidase-like	8	5.19883	5.39192	5.62611	5.71909	5.59406	5.09732	5.58429	5.46776	5.35914	5.63102	5.64132	5.6018	5.56245	5.63235	5.76911	5.73276	5.70695	5.6837
Q13769	THOC5	THO complex subunit 5 homolog	8	5.45808	5.49317	5.49633	5.45717	5.66224	5.68559	5.60781	5.61871	5.73164	5.57351	5.65715	5.49466	5.5168	5.5313	5.55174	5.42099	5.59588	5.4472
Q8NC56	LEMD2	LEM domain-containing protein 2	8	5.46048	5.81518	5.78591	5.79629	5.47892	5.52954	5.69491	5.89249	5.24895	5.59696	5.39691	5.47319	5.39424	5.30578	5.4987	5.35878	5.52065	5.75212
O00330	PDHX	Pyruvate dehydrogenase protein X component, mitochondrial	8	5.49108	5.54737	5.76684	5.36658	5.47113	5.43371	5.68429	5.70363	5.65567	5.36278	5.3114	5.39772	5.94591	5.69707	5.67192	5.59666	5.57113	5.32509
O75061-2	DNAJC6	Isoform 2 of Putative tyrosine-protein phosphatase auxilin	8	5.55812	5.67794	5.38454	5.62205	5.54306	5.42621	5.58085	5.79923	5.57316	5.51239	5.53595	5.45227	5.56627	5.50772	5.59831	5.77747	5.5513	5.33318
O60502	OGA	Protein O-GlcNAcase	8	5.6787	5.88865	5.55296	5.41006	5.4333	5.70562	5.80092	5.65259	5.33915	5.36977	5.48076	5.16679	5.48201	5.8	5.27964	5.60342	5.30914	6.04651
A0A1W2PQS6	RPS10-NUDT3	RPS10-NUDT3 readthrough	8	5.43575	5.43525	5.43551	5.5532	5.43033	5.37206	5.65921	5.50696	5.59977	5.44929	5.81166	5.45348	5.76066	5.53814	5.6603	5.50494	5.67481	5.71869
Q9HCE1	MOV10	Helicase MOV-10	8	5.62514	5.40122	5.44203	5.47086	5.74676	5.58513	5.4394	5.73442	5.44751	5.34817	5.24482	5.57575	5.37613	5.94149	5.40315	5.48185	6.20891	5.52725
P51149	RAB7A	Ras-related protein Rab-7a	8	5.64096	5.54826	5.62915	5.30097	5.54291	5.25626	5.55935	5.44575	5.53861	5.53576	5.72967	5.30535	5.43876	5.44488	6.11303	5.43558	5.92033	5.61444
O15439	ABCC4	ATP-binding cassette sub-family C member 4	8	5.33182	5.64087	5.57811	5.42411	5.48419	5.84353	5.36806	5.53678	5.74804	5.72623	5.38812	5.55225	5.67693	5.28688	5.639	5.70024	5.34414	5.73068
Q86U44	METTL3	N6-adenosine-methyltransferase catalytic subunit	8	5.86318	5.72922	5.45369	5.69017	5.44063	5.67415	5.47152	5.83145	5.38136	5.5824	5.40739	5.53887	5.35026	5.45072	5.34911	5.78953	5.3869	5.60947
P08195-4	SLC3A2	Isoform 4 of 4F2 cell-surface antigen heavy chain	8	5.54083	5.41504	5.57727	5.61289	5.51899	5.66215	5.60041	5.644	5.58209	5.55435	5.54317	5.59176	5.33004	5.30324	5.54905	5.81723	5.67107	5.4864
A0AVT1	UBA6	Ubiquitin-like modifier-activating enzyme 6	8	5.83316	5.15732	5.66977	5.257	5.65462	5.37104	5.87495	5.26531	5.81598	5.3435	5.79832	5.38784	5.66812	5.01249	5.79337	5.34892	6.04142	5.70688
Q9NW68-3	BSDC1	Isoform 3 of BSD domain-containing protein 1	8	5.49211	5.28899	5.65544	5.54634	5.5481	5.20195	5.57979	5.49127	5.68005	5.49902	5.68764	5.78659	5.57923	5.68124	5.52634	5.40771	5.46877	5.87941
Q13546	RIPK1	Receptor-interacting serine/threonine-protein kinase 1	8	5.69507	5.50777	5.47853	5.49482	5.38863	5.73604	5.45599	5.74517	5.64679	5.61324	5.28577	5.53759	5.66417	5.58884	5.63286	5.63889	5.43198	5.45785
P22392-2	NME2	Isoform 3 of Nucleoside diphosphate kinase B	8	5.24799	5.38591	5.49775	5.91859	5.38777	5.93738	5.37497	5.76594	5.26674	5.66574	5.42749	5.45591	5.31594	5.7573	5.48358	5.75908	5.47267	5.87924
Q9UI26-2	IPO11	Isoform 2 of Importin-11	8	5.53229	5.44672	5.50896	5.55134	5.57638	5.58691	5.80962	5.256	5.68932	5.39585	5.40951	5.45771	5.76455	5.42196	5.57916	5.44492	5.94068	5.6281
Q3V6T2	CCDC88A	Girdin	8	5.47519	5.68083	5.27548	5.21464	5.77381	5.57225	5.57598	5.86983	5.52886	5.59067	5.4339	5.47887	5.70894	5.48002	5.62281	5.54692	5.36254	5.80846
Q96A33	CCDC47	PAT complex subunit CCDC47	8	5.50539	5.22886	5.69204	5.49856	5.32199	5.27929	5.60496	5.20326	5.70012	5.43961	5.8945	5.56913	5.58484	5.45646	5.6866	5.36651	6.06123	5.90666
P46781	RPS9	40S ribosomal protein S9	8	5.27637	5.5175	5.80767	5.65522	5.54587	4.99704	5.53235	5.20967	5.23572	5.64775	5.90111	5.66749	5.62064	5.8518	5.64892	5.43438	5.71223	5.73828
O94874	UFL1	E3 UFM1-protein ligase 1	8	5.41537	5.59923	5.34968	5.48708	5.2853	5.68093	5.51695	5.74785	5.46867	5.61903	5.38301	5.49407	5.5183	5.84575	5.51384	5.78749	5.67926	5.60819
P18621-3	RPL17	Isoform 3 of 60S ribosomal protein L17	8	5.5224	5.38836	5.77588	5.42802	5.82895	5.34533	5.73656	5.40808	5.55146	5.77062	5.62931	5.45071	5.63717	5.56288	5.71586	5.38135	5.49435	5.3727
O14976	GAK	Cyclin-G-associated kinase	8	5.80089	5.55399	5.4355	5.55781	5.88354	5.52052	5.3442	5.65599	5.24345	5.43762	5.41286	5.48141	5.81757	5.3859	5.607	5.70727	5.67339	5.4811
P57740	NUP107	Nuclear pore complex protein Nup107	8	5.39753	5.54332	5.88865	5.54676	5.82972	5.48542	5.53266	5.63719	5.57911	5.40837	5.89008	5.61543	5.44805	5.52626	5.37266	5.61865	5.29665	5.38349
P49589-3	CARS1	Isoform 3 of Cysteine--tRNA ligase, cytoplasmic	8	5.52443	5.76986	5.40434	5.54707	5.4558	5.80544	5.48332	5.96013	5.38566	5.7664	5.35842	5.42646	5.31945	5.71941	5.47122	5.76568	5.23597	5.60094
Q96RP9-2	GFM1	Isoform 2 of Elongation factor G, mitochondrial	8	5.6834	5.3783	5.46286	5.56451	5.56101	5.47464	5.60086	5.42958	5.54287	5.56626	5.76582	5.63974	5.64129	5.48161	5.59925	5.54204	5.61587	5.45008
Q9BVI4	NOC4L	Nucleolar complex protein 4 homolog	8	5.4432	5.59677	5.88712	5.38133	5.80993	5.60622	5.94017	4.93582	5.47025	5.56656	5.9033	5.50036	5.4336	5.60946	5.95452	5.29604	5.29488	5.37048
Q9UNN5	FAF1	FAS-associated factor 1	8	5.18942	5.76515	5.53266	5.55046	5.4554	5.47386	5.57156	5.63907	5.65744	5.37616	5.58554	5.77618	5.47001	5.36179	5.51815	5.48996	5.57348	6.01372
Q96PU8	QKI	Protein quaking	8	5.21577	5.08457	5.65656	5.54354	5.67837	5.74569	5.49894	5.14351	5.67634	5.67663	5.44888	5.73758	5.91119	5.6892	5.17536	5.72209	5.76286	5.63292
Q969X6	UTP4	U3 small nucleolar RNA-associated protein 4 homolog	8	5.39925	5.29092	5.57618	5.5658	5.58372	5.5437	5.44459	5.53581	5.76746	5.67537	5.53692	5.44336	5.69347	5.60068	5.39307	5.6999	5.77726	5.47254
O43314	PPIP5K2	Inositol hexakisphosphate and diphosphoinositol-pentakisphosphate kinase 2	8	5.69022	6.01466	5.47266	5.3326	5.4869	5.12337	5.69166	5.6562	5.47991	5.44764	5.89688	5.62169	5.54511	5.4879	5.76216	5.52877	5.41423	5.34746
Q16795	NDUFA9	NADH dehydrogenase [ubiquinone] 1 alpha subcomplex subunit 9, mitochondrial	8	5.72852	5.67927	5.41251	5.52772	5.50408	5.75425	5.27824	5.88998	5.5735	5.95584	5.38703	5.79316	5.58394	5.2864	5.39225	5.65192	5.42704	5.17434
P53004	BLVRA	Biliverdin reductase A	8	5.72479	5.56011	5.43914	5.43039	5.54815	5.53883	5.48452	5.70077	5.5135	5.43309	5.47569	5.46561	5.53779	5.50118	5.62417	5.69584	5.79841	5.52801
Q8N122	RPTOR	Regulatory-associated protein of mTOR	8	5.27343	5.38357	5.6755	5.77101	5.59825	5.49924	5.65322	5.5532	5.58685	5.61999	5.52343	5.34225	5.20244	5.5569	5.71192	5.63484	5.67286	5.74112
P06748	NPM1	Nucleophosmin	8	5.67625	5.85564	5.45701	5.51878	5.69737	5.78784	5.6675	5.73178	5.52036	5.48872	5.41176	5.49117	5.74114	5.30242	5.48312	5.46123	5.4113	5.29662
P05556-3	ITGB1	Isoform 3 of Integrin beta-1	8	5.64042	5.4388	5.47516	5.52485	5.29181	5.58448	5.55243	5.7694	5.59439	5.61398	5.58606	5.55478	5.46124	5.63387	5.42221	5.6301	5.52684	5.6992
Q9ULU4-19	ZMYND8	Isoform 19 of Protein kinase C-binding protein 1	8	5.50269	5.56672	5.60975	5.49855	5.61423	5.68406	5.47036	5.70288	5.58233	5.70266	5.45043	5.44053	5.60382	5.49661	5.48953	5.63061	5.45171	5.50255
Q05086	UBE3A	Ubiquitin-protein ligase E3A	8	5.66867	5.60702	5.66322	5.46007	5.7165	5.649	5.42668	5.5545	5.49673	5.52539	5.57388	5.34285	5.67296	5.40946	5.53921	5.66074	5.48628	5.54685
P13798	APEH	Acylamino-acid-releasing enzyme	8	5.51339	5.64167	5.78428	5.533	5.69689	5.33323	5.60612	5.78991	5.63083	5.35323	5.63476	5.32938	5.47188	5.64986	5.72406	5.45779	5.42236	5.42737
P50991	CCT4	T-complex protein 1 subunit delta	8	5.45507	5.36653	5.60834	5.49711	5.51345	5.50579	5.46878	5.57902	5.45019	5.50284	5.59587	5.5438	5.66742	5.62099	5.49374	5.72799	5.76486	5.63822
Q8NCA5	FAM98A	Protein FAM98A	8	5.56172	5.54782	5.59738	5.51032	5.91107	5.35164	5.48232	5.70716	5.77093	5.47923	5.57651	5.56823	5.229	5.35253	5.54232	5.25454	5.80972	5.74756
Q6PJT7	ZC3H14	Zinc finger CCCH domain-containing protein 14	8	5.73244	5.45827	5.89122	5.68463	5.91269	5.51526	5.70264	5.43261	5.66271	5.30297	5.55694	5.41391	5.28351	5.40671	5.81131	5.32325	5.39488	5.51406
Q9NPH2	ISYNA1	Inositol-3-phosphate synthase 1	8	5.58093	5.31195	5.49888	5.67495	5.72947	5.46462	5.59343	5.49479	5.85117	5.28118	5.49244	5.59555	5.75365	5.34633	5.59645	5.55928	5.56284	5.61208
Q9ULX6	AKAP8L	A-kinase anchor protein 8-like	8	5.52245	5.54284	5.47054	5.91033	5.39661	5.59458	5.4684	5.58864	5.44709	5.5625	5.94035	5.60727	5.34752	5.28667	5.33104	5.65347	5.61896	5.71074
Q96ER3	SAAL1	Protein SAAL1	8	5.24038	5.43238	5.66783	5.66383	5.57204	5.47667	5.30299	5.50721	5.48994	5.50438	5.64639	5.51766	5.80287	5.45073	5.7175	5.65158	5.49964	5.85597
P62847-4	RPS24	Isoform 4 of 40S ribosomal protein S24	8	5.48059	5.675	5.42448	5.54	5.66453	5.59559	5.52019	5.62968	5.39376	5.62011	5.57016	5.4562	5.63517	5.41389	5.49311	5.67468	5.41577	5.79711
Q92616	GCN1	eIF-2-alpha kinase activator GCN1	7	5.82469	5.6084	5.65785	5.46534	5.77754	5.6178	5.58976	5.7933	5.72348	5.39601	5.54409	5.21712	5.59749	5.40768	5.7822	5.31009	5.29291	5.39425
Q9Y613	FHOD1	FH1/FH2 domain-containing protein 1	7	5.55337	5.43944	5.59716	5.50133	5.69584	5.51071	5.67975	5.73316	5.55606	5.42726	5.52908	5.48314	5.47311	5.43496	5.63494	5.5743	5.59631	5.58008
A0FGR8-2	ESYT2	Isoform 2 of Extended synaptotagmin-2	7	5.49506	5.32858	5.53876	5.59541	5.47074	5.56483	5.68348	5.51297	5.62088	5.64518	5.81199	5.5849	5.39548	5.47587	5.63414	5.50284	5.66228	5.47661
Q99615	DNAJC7	DnaJ homolog subfamily C member 7	7	5.2726	5.58335	5.34552	6.03622	5.65223	5.56654	5.19941	5.82415	5.40682	5.6444	5.46624	5.6184	5.18308	6.52935	5.40084	5.75451	5.22443	5.2919
Q96F86	EDC3	Enhancer of mRNA-decapping protein 3	7	5.75759	6.16075	5.85155	5.23423	5.40484	5.38015	5.95311	5.63378	5.77439	5.76519	5.69446	5.85159	5.08096	5.17244	4.84555	5.65385	5.43137	5.35421
Q9NS87	KIF15	Kinesin-like protein KIF15	7	5.62333	5.25464	5.65679	5.2759	5.57585	5.78815	5.72522	5.46029	5.50685	5.32533	5.72029	5.44308	5.43139	5.53732	5.6424	5.49788	5.8391	5.69619
Q9BW27	NUP85	Nuclear pore complex protein Nup85	7	5.43628	5.74921	5.43731	5.30631	5.53389	5.59179	5.41399	5.65048	5.47414	5.5308	5.65944	5.74709	5.85018	5.64489	5.56278	5.36749	5.6678	5.37615
P26358-2	DNMT1	Isoform 2 of DNA (cytosine-5)-methyltransferase 1	7	6.07786	6.56156	5.52332	5.40525	5.43158	5.57366	5.51546	5.8222	5.44142	6.04726	5.14617	5.32245	5.53954	5.48133	5.20445	5.5364	5.1876	5.18248
O60293	ZFC3H1	Zinc finger C3H1 domain-containing protein	7	5.23723	5.81906	5.36813	5.58666	5.3394	5.70315	5.49548	5.94214	5.47407	5.88083	5.98444	5.8659	5.24218	5.76535	5.42555	5.24904	5.24499	5.37641
P08865	RPSA	40S ribosomal protein SA	7	5.37606	5.57322	5.64627	5.11394	5.59647	5.37223	5.62029	5.68334	5.64989	5.47554	5.62355	5.34955	5.60407	5.21711	5.64951	5.62047	6.03077	5.79771
Q9BZE4	GTPBP4	Nucleolar GTP-binding protein 1	7	5.49698	5.74348	5.53748	5.92714	5.36342	5.57607	5.49585	5.78179	5.48184	5.73435	5.4036	5.59298	5.4634	5.38441	5.48252	5.4354	5.36461	5.73468
Q9GZR7	DDX24	ATP-dependent RNA helicase DDX24	7	5.48939	5.52457	5.74319	5.66751	5.49098	5.4139	5.71183	5.30603	5.62666	5.65717	5.48237	5.36847	5.51918	5.44487	5.76451	5.53425	5.65513	5.59999
Q09666	AHNAK	Neuroblast differentiation-associated protein AHNAK	7	5.67159	5.60763	5.44989	5.41779	5.68766	5.71248	5.52163	5.61298	5.52281	5.52934	5.56493	5.39553	5.65125	5.56881	5.56422	5.52855	5.38696	5.60595
A0A7I2V5Y5	KIF23	Kinesin-like protein KIF23	7	5.55773	5.79499	5.57519	5.39543	5.46255	5.55168	5.37792	5.48395	5.31216	5.77201	5.54293	5.33661	5.72283	5.7182	5.80654	5.47625	5.35649	5.75654
Q9UBB4	ATXN10	Ataxin-10	7	5.86979	5.35281	5.43764	5.44628	5.69969	5.34747	5.54043	5.36383	5.51197	5.36281	5.73117	5.44694	5.85189	5.40086	5.59172	5.42259	5.92462	5.69748
Q9P2D1	CHD7	Chromodomain-helicase-DNA-binding protein 7	7	6.21801	5.80635	5.70286	5.7092	5.56982	5.19964	5.37375	5.44096	5.75883	5.86703	5.28752	5.27951	5.12097	5.44977	5.6181	5.37358	5.42255	5.80155
P23246	SFPQ	Splicing factor, proline- and glutamine-rich	7	5.97525	5.37097	5.73454	5.71922	5.56302	5.51847	5.64403	5.42934	5.82913	5.3358	5.5324	5.3423	5.59185	5.37829	5.47699	5.25632	5.78861	5.51347
G3V325	ATP5MF-PTCD1	ATP5MF-PTCD1 readthrough	7	5.75286	5.62262	5.28156	5.68157	5.7594	5.74284	5.34493	5.66436	5.44679	5.54527	5.49512	5.63542	5.45491	5.42393	5.28305	5.76917	5.52605	5.57013
Q15437	SEC23B	Protein transport protein Sec23B	7	5.60985	5.48711	5.64971	5.48312	5.51224	5.41149	5.51839	5.7641	5.72541	5.50737	5.42049	5.58147	5.534	5.45091	5.49708	5.60262	5.34499	5.89964
P41229	KDM5C	Lysine-specific demethylase 5C	7	5.53148	5.73233	5.72656	5.58217	5.75651	5.58301	5.70012	5.67171	5.66592	5.43482	5.32497	5.36209	5.78742	5.07964	5.26379	5.66876	5.42746	5.70127
Q9H6R4	NOL6	Nucleolar protein 6	7	5.52757	5.51948	5.46541	5.8794	5.96359	5.71764	5.63895	5.648	5.82054	5.2941	5.75713	5.39035	5.65136	5.39662	5.22546	5.57631	5.40026	5.12782
P30740	SERPINB1	Leukocyte elastase inhibitor	7	5.42272	5.45753	5.57404	5.42401	5.3256	5.70261	5.50356	5.4699	5.70559	5.4685	5.62511	5.60472	5.66239	5.46166	5.56863	5.57019	5.68042	5.77281
Q04323	UBXN1	UBX domain-containing protein 1	7	5.16032	5.78346	5.51154	5.68111	5.72267	5.38087	5.71882	5.46074	5.3485	5.66945	5.71662	5.64228	5.60359	5.86567	5.48304	5.5553	5.42523	5.27079
A0A0B4J2D5	GATD3B	Glutamine amidotransferase-like class 1 domain-containing protein 3B, mitochondrial	7	5.24846	5.55634	5.2972	5.5598	5.71655	5.49965	5.72492	5.14381	5.54278	5.59873	5.43751	5.59289	5.60323	5.96342	5.64435	5.48248	5.6087	5.77917
P11274	BCR	Breakpoint cluster region protein	7	5.86691	5.49296	5.09699	5.49084	5.61661	5.47676	5.60486	5.62534	5.48718	5.35755	5.4319	5.5584	5.40829	5.64441	5.76726	5.75079	5.56081	5.76213
P52630	STAT2	Signal transducer and activator of transcription 2	7	5.6928	5.56435	5.74779	5.49365	5.50693	5.35984	5.23991	5.71506	5.2908	5.46971	5.56725	5.39836	5.40883	6.02633	5.35138	5.58636	5.74692	5.83371
P05388	RPLP0	60S acidic ribosomal protein P0	7	5.59766	5.51375	5.57868	5.52026	5.67648	5.66114	5.66333	5.80129	5.55346	5.57238	5.27003	5.36789	5.68668	5.541	5.59896	5.65223	5.30658	5.4382
Q86UX7	FERMT3	Fermitin family homolog 3	7	5.6758	5.47471	5.42366	5.65504	5.8126	5.36582	5.52843	5.47441	5.87576	5.67319	5.44403	5.51804	5.52903	5.64877	5.38076	5.57846	5.34303	5.59848
Q9BR76	CORO1B	Coronin-1B	7	5.70791	5.65038	5.38487	5.54675	5.56485	5.60177	5.63734	5.65584	5.46995	5.58117	5.47845	5.4571	5.64381	5.5588	5.64089	5.56475	5.38759	5.46777
A3KN83	SBNO1	Protein strawberry notch homolog 1	7	5.45473	5.46628	5.58124	5.4356	5.6299	5.74833	5.54848	5.81632	5.48725	5.45746	5.5048	5.48182	5.34739	5.5116	5.51	5.41708	5.74022	5.86152
Q96AE4-2	FUBP1	Isoform 2 of Far upstream element-binding protein 1	7	5.63746	5.06416	5.64777	5.34502	5.87181	5.36378	5.61847	5.25837	5.76315	5.25788	5.6263	5.43781	5.72644	5.34175	5.95839	5.62221	5.87931	5.57992
Q96I24	FUBP3	Far upstream element-binding protein 3	7	5.41318	5.92744	5.34531	5.7635	5.63006	5.73011	5.31212	5.65115	5.44417	5.57789	5.222	5.55475	5.67864	5.73113	5.47054	5.87904	5.12611	5.54283
Q9Y2Q3-2	GSTK1	Isoform 2 of Glutathione S-transferase kappa 1	7	5.47856	5.53641	5.72648	5.39505	5.42431	5.51254	5.37447	5.60889	5.46622	5.43268	5.71876	5.57427	5.47208	5.53413	5.56837	5.53227	5.8241	5.8204
P39023	RPL3	60S ribosomal protein L3	7	5.49386	5.90487	5.32637	5.73703	5.42762	5.54848	5.58363	5.88613	5.34429	5.79464	5.58771	5.38413	5.78906	5.71894	5.26813	5.43231	5.40448	5.36833
O94776	MTA2	Metastasis-associated protein MTA2	7	5.48924	5.44157	5.50543	5.38838	5.55021	5.33054	5.71426	5.60632	5.4372	5.7083	5.66992	5.56913	5.64197	5.56849	5.55916	5.32296	5.78078	5.71615
Q14191	WRN	Werner syndrome ATP-dependent helicase	7	5.60736	5.66122	5.40774	5.64532	5.38081	5.6951	5.9346	5.8038	5.76014	5.50235	5.32593	5.46612	5.69986	5.13781	5.48193	5.46263	5.59388	5.4334
Q9UK61	TASOR	Protein TASOR	7	5.46811	5.65707	5.10414	5.51962	5.2686	5.77253	5.01841	5.00361	5.6303	5.59243	5.35889	5.57744	6.38694	5.6537	5.56909	5.76224	5.67379	5.9831
Q86VM9	ZC3H18	Zinc finger CCCH domain-containing protein 18	7	5.58482	5.52732	5.46961	5.61476	5.64182	5.61933	5.5846	5.75901	5.60183	5.41137	5.66751	5.32756	5.52082	5.40111	5.58929	5.63272	5.5475	5.49903
Q9BWH6	RPAP1	RNA polymerase II-associated protein 1	7	5.41009	5.50474	5.64533	5.70418	5.45397	5.90835	5.40449	5.41958	5.59361	5.57282	5.30219	5.8513	5.22394	5.40483	5.78658	5.28856	5.71724	5.80817
P62714	PPP2CB	Serine/threonine-protein phosphatase 2A catalytic subunit beta isoform	7	5.0144	5.8684	5.92564	5.47759	5.55454	5.80515	5.64275	4.96694	5.66937	5.74262	5.60316	5.75332	5.92006	5.94725	5.47813	5.54736	5.12435	4.95896
P60510	PPP4C	Serine/threonine-protein phosphatase 4 catalytic subunit	7	5.09292	5.86451	6.05327	6.03591	5.85421	5.12285	5.87052	3.89635	5.73018	6.09766	5.77078	6.14266	6.19541	6.07879	5.76605	4.88669	4.93691	4.60433
O14672	ADAM10	Disintegrin and metalloproteinase domain-containing protein 10	7	5.66134	5.68016	5.74982	5.49173	5.51729	5.35595	5.94223	5.48111	5.42901	5.70106	5.75417	5.26083	5.45338	5.1493	5.27162	5.6468	5.76046	5.69373
Q9H4A4	RNPEP	Aminopeptidase B	7	5.73483	5.86943	5.30797	5.56115	5.72326	5.70319	5.5919	5.85591	5.21641	5.72713	5.29106	5.37297	5.57828	5.90847	5.38481	5.53903	5.18486	5.44936
O76094	SRP72	Signal recognition particle subunit SRP72	7	5.60771	5.22674	6.19744	5.42184	5.03545	5.23129	5.7484	5.24687	5.84572	5.30509	5.98133	5.59561	5.6689	5.11161	5.70304	5.39423	5.92567	5.75308
Q9ULV4-3	CORO1C	Isoform 3 of Coronin-1C	7	5.36554	5.60293	5.64607	5.83631	5.28649	5.32229	5.59492	5.54457	5.49534	5.50415	5.68011	5.46502	5.41213	5.33527	5.60234	5.6596	5.70758	5.93935
P07437	TUBB	Tubulin beta chain	7	5.53663	5.61276	5.68113	5.61	5.6997	5.45267	5.58647	5.2933	5.55186	5.25779	5.67762	5.42397	5.58427	5.51098	5.56298	5.67947	5.61214	5.66627
P28074	PSMB5	Proteasome subunit beta type-5	7	5.5685	5.96762	5.5083	5.61668	5.75366	5.65357	5.43868	5.07952	5.53443	5.72904	5.76088	5.92663	5.55962	5.41919	5.38461	5.59737	5.5234	4.97831
Q14139-2	UBE4A	Isoform 2 of Ubiquitin conjugation factor E4 A	7	5.76317	5.60949	5.54864	5.56698	5.29812	5.70519	5.61391	5.8265	5.55691	5.56571	5.26247	5.59569	5.43981	5.2176	5.37479	5.60013	5.87602	5.57887
Q99832	CCT7	T-complex protein 1 subunit eta	7	5.52231	5.55339	5.20799	5.33373	5.47142	5.47112	5.40714	5.422	5.56636	5.51621	5.61304	5.69664	5.79679	5.93914	5.62409	5.72826	5.60087	5.5295
Q9Y4F3-5	MARF1	Isoform 4 of Meiosis regulator and mRNA stability factor 1	7	5.44711	5.53257	5.83115	5.76521	5.50081	5.5791	5.58039	5.31618	5.63513	5.63298	5.71913	5.68768	5.42751	5.3672	5.67885	5.51124	5.32168	5.46609
P37837	TALDO1	Transaldolase	7	5.64673	5.586	5.38508	5.82483	5.46918	5.87402	5.60782	5.82529	5.39596	5.09365	5.42079	5.66041	5.34678	5.24025	5.67466	5.56935	5.58165	5.79756
Q07866-9	KLC1	Isoform I of Kinesin light chain 1	7	5.47734	5.27425	5.20088	5.76846	5.74195	5.80175	5.33697	5.23953	5.25697	5.14074	5.28703	5.08791	6.31914	6.57039	6.53612	5.30362	5.2826	5.37434
Q14674	ESPL1	Separin	7	5.55761	5.18608	5.42412	5.74662	5.29439	5.36914	5.35656	5.66077	5.56449	5.46507	5.75892	5.8071	5.53595	5.51035	5.85454	5.55072	5.65161	5.70595
Q9NVI1	FANCI	Fanconi anemia group I protein	7	5.91369	5.32524	5.69857	5.33461	5.67278	5.4403	5.50441	5.67053	5.8095	5.50921	5.55156	5.22026	5.68459	5.47797	5.2421	5.59681	5.7322	5.61567
P13796	LCP1	Plastin-2	7	5.49084	5.67315	5.40649	5.52446	5.61144	5.59991	5.59101	5.93927	5.54948	5.54028	5.57151	5.57821	5.39898	5.31458	5.34657	5.5126	5.42884	5.92238
Q14697-2	GANAB	Isoform 2 of Neutral alpha-glucosidase AB	7	5.35928	5.20452	5.82668	5.50123	5.52836	5.64831	5.67783	5.47571	5.43855	5.49134	5.55563	5.49439	5.67279	5.67904	5.67299	5.62875	5.47274	5.67186
P21980	TGM2	Protein-glutamine gamma-glutamyltransferase 2	7	5.65798	5.62843	5.49367	5.74093	5.6503	5.5375	5.59052	5.72846	5.51628	5.59376	5.31542	5.59473	5.74832	5.56715	5.38117	5.54585	5.31906	5.39046
O43776	NARS1	Asparagine--tRNA ligase, cytoplasmic	7	5.60729	5.44676	5.63112	5.49423	5.4591	5.86292	5.38647	5.33115	5.73529	5.615	5.45059	5.53297	5.5325	5.61249	5.35826	5.60775	5.65791	5.67821
P49915	GMPS	GMP synthase [glutamine-hydrolyzing]	7	5.7165	5.46071	5.69553	5.60709	5.64271	5.5674	5.61594	5.61732	5.69839	5.34974	5.26706	5.42144	5.64049	5.32005	5.56387	5.58825	5.6676	5.55989
P18669	PGAM1	Phosphoglycerate mutase 1	7	5.60882	5.72411	5.28933	5.46501	5.67447	5.7991	5.43241	5.64151	5.43084	5.78504	5.40181	5.56729	5.67766	5.92068	5.38215	5.61923	5.14906	5.43146
Q15020	SART3	Squamous cell carcinoma antigen recognized by T-cells 3	7	5.87422	5.46014	5.39202	5.4175	5.64212	5.50179	5.67349	5.68405	5.48003	5.60725	5.7898	5.16187	5.78059	5.7632	5.29219	5.4134	5.49519	5.57115
P62333	PSMC6	26S proteasome regulatory subunit 10B	7	5.56021	5.73898	5.65362	5.68378	5.65189	5.31974	5.50427	5.53792	5.614	5.48525	5.66933	5.91978	5.47778	5.27299	5.5497	5.54878	5.24019	5.57182
Q13596-3	SNX1	Isoform 3 of Sorting nexin-1	7	5.67458	5.86524	5.27977	5.33028	5.58375	5.82561	5.56139	5.82582	5.51238	5.41465	5.32962	5.13949	5.79951	5.4357	5.72169	5.6218	5.52918	5.54955
Q7Z5J4	RAI1	Retinoic acid-induced protein 1	7	5.61529	5.53247	5.74103	5.14664	5.42088	5.6339	5.85013	5.62586	5.96749	5.77853	5.57921	5.46075	5.52687	5.25985	5.33258	5.6561	5.37054	5.50188
Q9BY77	POLDIP3	Polymerase delta-interacting protein 3	7	5.74037	5.42339	5.61114	5.9741	5.3655	5.76585	5.59491	5.32035	5.67128	5.56702	5.52259	5.60132	5.42817	5.53307	5.41439	5.5157	5.57725	5.37358
Q9NSD9	FARSB	Phenylalanine--tRNA ligase beta subunit	7	5.37001	5.53883	5.1951	5.57424	5.56035	5.42799	5.79895	5.70363	5.62743	5.53987	5.33808	5.79746	5.41721	5.66448	5.42058	5.49413	5.55187	5.97979
Q93084-5	ATP2A3	Isoform SERCA3E of Sarcoplasmic/endoplasmic reticulum calcium ATPase 3	7	5.41252	5.50014	5.69732	5.63611	5.41338	5.35015	5.39216	5.71975	5.53363	5.56822	5.50074	5.50139	5.51561	5.60571	5.50422	5.71419	5.66841	5.76637
Q4V328	GRIPAP1	GRIP1-associated protein 1	7	5.00254	5.72134	5.67612	5.54536	5.43079	5.36585	5.35951	5.38957	5.28007	5.19761	5.62918	5.93982	5.95236	5.85815	6.04347	5.45383	5.47855	5.67587
Q9BVJ6	UTP14A	U3 small nucleolar RNA-associated protein 14 homolog A	7	5.50961	5.42772	5.56859	5.5493	5.5996	5.44991	5.54306	5.42866	5.8168	5.48447	5.59427	5.33211	5.72068	5.43199	5.68838	5.29685	5.92093	5.63707
Q14149	MORC3	MORC family CW-type zinc finger protein 3	7	5.75137	5.58819	5.73813	5.37442	5.65181	5.21264	5.83209	5.4787	5.90487	5.45053	5.65011	5.4687	5.61945	5.28487	5.62267	5.22224	5.68383	5.46538
Q66K14	TBC1D9B	TBC1 domain family member 9B	7	5.40891	5.56325	5.51764	5.59522	5.29585	5.52575	5.57324	5.82664	5.41401	5.66867	5.50372	5.6649	5.39861	5.40674	5.71322	5.55678	5.73264	5.63422
Q8N3C0	ASCC3	Activating signal cointegrator 1 complex subunit 3	7	5.58437	5.43531	5.71514	5.31733	5.659	5.381	5.722	5.44042	5.62581	5.43885	5.77256	5.54106	5.43135	5.61508	5.523	5.37116	5.66055	5.76601
Q6UN15	FIP1L1	Pre-mRNA 3'-end-processing factor FIP1	7	5.65232	5.57463	5.84887	5.69202	5.68514	5.21168	5.68818	5.17706	5.59192	5.6103	5.71813	5.62539	5.52332	5.28182	5.71449	5.39591	5.64695	5.36188
Q9Y5Q9	GTF3C3	General transcription factor 3C polypeptide 3	7	5.55115	5.56857	5.39807	5.57252	5.491	5.82297	5.31655	5.62234	5.53324	5.68903	5.54189	5.50836	5.66235	5.55128	5.62249	5.66139	5.57918	5.30763
Q9NZN8	CNOT2	CCR4-NOT transcription complex subunit 2	7	5.41019	5.71086	5.36031	5.48164	5.69498	5.7305	5.52676	5.78814	5.70598	5.37075	5.33523	5.58162	5.66837	5.79592	5.57441	5.69839	5.3295	5.23645
Q92621	NUP205	Nuclear pore complex protein Nup205	7	5.47017	5.68207	5.59001	6.09867	5.52936	5.95148	5.29483	5.82538	5.03306	5.81723	5.39834	5.62118	5.44956	5.51345	5.2953	5.59045	5.1461	5.69336
O75665	OFD1	Oral-facial-digital syndrome 1 protein	7	5.57393	5.30075	5.47815	5.76088	5.38477	5.51648	5.28228	5.60229	5.40294	5.41435	5.40798	5.70362	5.52878	5.50115	5.73826	5.81442	5.96725	5.62171
P54578	USP14	Ubiquitin carboxyl-terminal hydrolase 14	7	5.45932	5.57935	6.13681	5.47197	5.7453	5.73732	5.60574	5.99269	5.50932	5.33632	5.22715	5.16201	5.58023	5.47062	5.37597	5.44153	5.46876	5.6996
P40227	CCT6A	T-complex protein 1 subunit zeta	7	5.56075	5.54989	5.60568	5.59428	5.60247	5.50339	5.63338	5.47025	5.63464	5.54496	5.56891	5.58123	5.60603	5.61119	5.47084	5.47587	5.47589	5.51035
Q13416	ORC2	Origin recognition complex subunit 2	7	5.63782	5.61365	5.45545	5.39882	5.47538	5.68127	5.40367	5.72679	5.45569	5.6444	5.36208	5.48727	5.5028	5.63738	5.51873	5.59403	5.86002	5.54476
Q9NRR5	UBQLN4	Ubiquilin-4	7	5.65251	5.18021	5.34431	5.29518	5.4865	5.39705	5.55515	5.59391	5.76173	5.39962	5.5311	5.62654	5.83108	5.80336	5.76581	5.51714	5.69937	5.55943
Q5JSL3	DOCK11	Dedicator of cytokinesis protein 11	7	5.64709	5.28205	5.55619	5.38411	5.14536	5.75685	5.63377	5.52985	5.72688	5.74457	5.75581	5.90672	5.34907	5.06108	5.33397	5.6883	5.783	5.71533
Q8TF46	DIS3L	DIS3-like exonuclease 1	7	5.87451	5.66517	5.01032	5.37849	5.58062	5.59045	5.36631	5.6192	5.69519	5.29195	5.58595	5.66937	5.33846	5.7663	5.61982	5.45861	5.77354	5.71573
P51858	HDGF	Hepatoma-derived growth factor	7	5.35389	5.95143	5.26926	5.87702	5.51513	5.71726	5.43349	5.97903	5.34527	5.71499	5.18561	5.53873	5.39396	5.75921	5.42679	5.67939	5.21935	5.6402
Q96KR1	ZFR	Zinc finger RNA-binding protein	7	5.31956	5.69508	5.68128	5.60208	5.6006	5.56128	5.43048	5.63744	5.37048	5.49807	5.54834	5.36643	5.58265	5.54597	5.49226	5.63065	5.74082	5.69653
Q9UPW6	SATB2	DNA-binding protein SATB2	7	5.13425	5.40112	5.40367	5.68708	5.27081	5.44526	5.46831	5.75622	5.38894	5.52219	5.78901	5.4726	5.55102	5.62353	5.70851	5.81232	5.50374	6.06141
Q9NQR4	NIT2	Omega-amidase NIT2	7	6.04781	5.82425	5.44477	5.62186	5.41662	5.59763	5.35992	5.27402	5.48014	5.63217	5.97079	5.84255	5.18978	5.72173	5.27199	5.41473	5.57	5.31922
P55039	DRG2	Developmentally-regulated GTP-binding protein 2	7	5.81115	5.6027	5.7535	5.55521	5.57137	5.68253	5.50891	5.64214	5.57913	5.6868	5.55132	5.45172	5.55891	5.42382	5.38676	5.44673	5.54488	5.24242
Q9H1I8	ASCC2	Activating signal cointegrator 1 complex subunit 2	7	5.31158	5.71258	5.7024	5.87448	5.68827	5.72924	5.29804	5.64765	5.56238	5.48524	5.40625	5.77624	5.63748	5.30354	5.41431	5.60227	5.27628	5.57177
Q04726-4	TLE3	Isoform 4 of Transducin-like enhancer protein 3	7	5.50421	5.2787	5.67633	5.48287	5.5012	5.5987	5.66002	5.13822	5.88211	5.47176	5.67435	5.69194	5.46967	5.62987	5.78304	5.50887	5.51358	5.53454
P46779-3	RPL28	Isoform 3 of 60S ribosomal protein L28	7	5.53239	5.52123	5.53493	5.22695	5.90966	5.92806	5.53045	5.65385	5.4101	5.4483	5.31631	5.67828	5.52981	5.65104	5.53349	5.66979	5.53689	5.38847
P20585	MSH3	DNA mismatch repair protein Msh3	7	5.90038	5.72935	5.93504	5.36917	5.1501	5.10079	5.40927	5.60086	5.45199	5.61449	5.84258	5.73891	5.41442	5.55074	5.42956	5.3231	6.08373	5.35551
Q8WWN8	ARAP3	Arf-GAP with Rho-GAP domain, ANK repeat and PH domain-containing protein 3	7	5.45739	5.80864	5.3786	5.50958	5.33083	5.72794	5.3377	5.6894	5.78815	5.20749	5.55599	5.62465	5.53274	5.40346	5.41783	5.62896	5.71092	5.88973
O75155	CAND2	Cullin-associated NEDD8-dissociated protein 2	7	5.61496	5.63962	5.54724	5.77199	5.43663	5.48219	5.57653	5.62749	5.58446	5.91774	5.50943	5.48566	5.36258	5.87499	5.23226	5.5811	5.3931	5.36204
P49815	TSC2	Tuberin	7	5.52245	5.36737	5.73884	5.59223	5.43733	5.46735	5.63558	5.49811	5.3263	5.56084	5.66644	5.78715	5.33178	5.5356	5.29443	5.58036	5.72126	5.93658
O60231	DHX16	Pre-mRNA-splicing factor ATP-dependent RNA helicase DHX16	7	5.61492	5.57761	5.65081	5.64904	5.46476	5.40218	5.78679	5.41745	5.45926	5.74165	5.63306	5.40252	5.44272	5.21702	5.63188	5.60479	5.52508	5.77845
Q8TEM1	NUP210	Nuclear pore membrane glycoprotein 210	7	5.60547	5.22096	5.6228	5.84837	5.56138	5.18581	5.53963	5.22277	5.99344	5.40576	5.98751	5.4339	5.78207	5.09109	5.29724	5.43366	5.9225	5.84565
Q13459	MYO9B	Unconventional myosin-IXb	7	5.41865	5.59088	5.25679	5.5328	5.24722	5.52259	5.72129	5.51949	5.47911	5.66182	5.64458	5.63532	5.73205	5.40632	5.62537	5.34914	5.75156	5.90501
O60313-10	OPA1	Isoform 4 of Dynamin-like 120 kDa protein, mitochondrial	7	5.85099	5.84222	5.65834	5.48229	5.22369	5.5268	6.05996	6.37989	5.41485	5.51593	4.87987	5.36433	5.46131	5.7798	5.29926	5.43607	5.19253	5.63189
Q9BVP2	GNL3	Guanine nucleotide-binding protein-like 3	7	5.68556	5.51041	6.0168	5.29671	5.67668	5.43374	5.76671	4.73762	6.14454	5.25651	5.88763	5.73668	5.52831	5.17472	5.61822	5.38264	5.71692	5.4296
P02786	TFRC	Transferrin receptor protein 1	7	5.68393	5.56652	5.31805	5.40512	5.79457	5.64765	5.43823	5.78433	5.56126	5.37246	5.33677	5.28145	5.82467	5.53889	5.40205	5.3332	6.49948	5.21138
Q9Y4R8	TELO2	Telomere length regulation protein TEL2 homolog	7	5.61832	5.6859	5.65119	5.64068	5.3726	5.1596	5.48331	5.16115	5.85801	5.6621	5.56389	5.8209	5.48022	5.28719	5.83561	5.22848	5.91935	5.57152
Q13617-2	CUL2	Isoform 2 of Cullin-2	7	5.7013	5.50424	5.58238	5.52122	5.77741	5.50354	5.56867	5.65083	5.44292	5.51187	5.59848	5.421	5.62557	5.42152	5.66705	5.48896	5.51209	5.50096
Q96BP3	PPWD1	Peptidylprolyl isomerase domain and WD repeat-containing protein 1	7	5.61232	5.57515	5.54543	5.66508	5.52379	5.60006	5.68893	5.71202	5.72019	5.34609	5.3925	5.55317	5.52604	5.36202	5.54688	5.5816	5.47588	5.57285
P14550	AKR1A1	Aldo-keto reductase family 1 member A1	7	5.31922	5.61696	5.45417	5.59531	5.35526	5.60227	5.54403	5.75765	5.89753	5.47697	5.49698	5.6449	5.6673	5.57945	5.52825	5.46284	5.33724	5.66367
P43487	RANBP1	Ran-specific GTPase-activating protein	7	5.05832	6.61472	4.79156	6.06505	5.34608	6.61929	4.93769	6.55849	4.92567	5.93861	4.57024	5.77305	5.16255	6.57408	5.00735	6.05543	4.55	5.45182
Q69YN4	VIRMA	Protein virilizer homolog	7	6.01404	5.49525	5.59737	5.44265	5.33962	5.49779	5.42473	5.58434	5.36248	5.41724	5.83626	5.60633	5.55797	5.37638	5.65202	5.39579	6.03299	5.36673
P16278	GLB1	Beta-galactosidase	7	5.40174	5.54902	5.68278	5.63543	5.45876	5.63721	5.54717	5.33311	5.39336	5.69973	5.58648	5.70191	5.51321	5.56551	5.59874	5.41405	5.62561	5.65619
Q9NRZ9	HELLS	Lymphoid-specific helicase	7	5.37642	5.31779	5.68463	5.29283	5.59306	5.43303	5.65559	5.54459	5.6797	5.56452	5.59167	5.29733	5.658	5.46939	5.85969	5.58489	5.72325	5.67363
O43447	PPIH	Peptidyl-prolyl cis-trans isomerase H	7	5.50918	5.5102	5.62056	5.37164	5.81577	5.7856	5.73066	5.5338	5.70641	5.45995	5.43252	5.47569	5.69227	5.61713	5.48744	5.54452	5.37892	5.32774
Q06203	PPAT	Amidophosphoribosyltransferase	7	5.80748	5.62785	5.51795	5.50551	5.61611	5.75002	5.57682	5.78221	5.53438	5.5017	5.44095	5.35083	5.64456	5.59416	5.54837	5.61258	5.31096	5.27756
P33121-3	ACSL1	Isoform 3 of Long-chain-fatty-acid--CoA ligase 1	7	5.49472	5.33576	5.36122	5.35236	5.48855	5.86539	5.76008	5.44957	5.5742	5.37913	5.70884	5.52495	5.75347	5.7212	5.445	5.64726	5.62003	5.51827
O94880-2	PHF14	Isoform 2 of PHD finger protein 14	7	5.35664	5.59505	5.61092	5.61061	5.56929	5.67309	5.47869	5.92541	5.37054	5.50785	5.38995	5.62669	5.42905	5.4804	5.65487	5.44519	5.48544	5.79032
Q04206	RELA	Transcription factor p65	7	5.5248	5.3343	5.48992	5.5847	5.60727	5.55618	5.54712	5.37953	5.81998	5.23444	5.61509	5.55403	5.64967	5.49438	5.59777	5.53981	5.82553	5.64548
A0JNW5	UHRF1BP1L	UHRF1-binding protein 1-like	7	5.57674	5.3319	5.85238	5.48976	5.84948	5.55279	5.52212	5.52318	5.49196	5.12315	5.72845	5.43567	5.56626	5.47765	5.36302	5.76125	5.64793	5.70632
P83916	CBX1	Chromobox protein homolog 1	7	5.73293	5.77214	5.27415	5.7246	5.73792	5.81039	5.51253	5.70872	4.99612	5.65875	5.34283	5.64708	5.15332	5.79929	5.15771	5.89013	5.2288	5.8526
P33992	MCM5	DNA replication licensing factor MCM5	7	5.42408	5.39592	5.5142	5.62302	5.31583	5.53891	5.61366	5.61526	5.575	5.75741	5.56103	5.6644	5.4502	5.38871	5.63658	5.56313	5.68393	5.67873
Q96I25	RBM17	Splicing factor 45	7	5.47804	5.94564	5.29796	5.8245	5.46316	5.76223	5.47643	5.82353	5.3135	5.54333	5.27707	5.82255	5.2471	6.00839	5.30933	5.66754	5.1906	5.54909
C9JMV9	ABHD14A-ACY1	N-acyl-L-amino-acid amidohydrolase	7	5.29062	5.28916	5.65466	5.60797	5.48332	5.55066	5.76191	5.37897	5.40483	5.82254	5.40357	5.75921	5.79016	5.87464	5.55289	5.51397	5.46227	5.39864
Q8NBU5	ATAD1	Outer mitochondrial transmembrane helix translocase	7	5.45499	5.72208	5.40426	5.50734	5.417	5.74003	5.28164	5.74042	5.4895	5.57778	5.40732	5.70332	5.56212	5.73618	5.54969	5.52542	5.61536	5.56553
P04818	TYMS	Thymidylate synthase	7	5.36518	5.59867	5.56859	5.61937	5.44222	5.68063	5.49008	5.74368	5.54385	5.8187	5.41208	5.63092	5.42817	5.36684	5.52297	5.50553	5.53347	5.72906
P11021	HSPA5	Endoplasmic reticulum chaperone BiP	7	5.22307	5.25098	5.87295	5.54873	5.7265	5.39304	5.66629	5.3699	5.78853	5.43095	5.597	5.33726	5.74687	5.41881	5.7478	5.65495	5.618	5.60837
Q9NVM9	INTS13	Integrator complex subunit 13	7	5.3822	5.62789	5.29832	5.55405	5.23249	5.4799	5.49305	5.69835	5.33087	5.69683	5.60292	5.65954	5.49607	5.78485	5.64291	5.59615	5.5264	5.89721
P48506	GCLC	Glutamate--cysteine ligase catalytic subunit	7	5.2761	5.826	5.72317	5.87044	5.98687	5.40536	5.24693	5.41087	5.41397	5.7299	5.43018	5.72055	5.27037	5.38338	5.36273	5.55318	5.64875	5.74126
P61221	ABCE1	ATP-binding cassette sub-family E member 1	7	5.61296	5.42433	5.50638	5.76276	5.49308	5.8873	5.49493	5.63972	5.52707	5.60539	5.30012	5.43438	5.491	5.76682	5.46436	5.84113	5.31653	5.43174
Q9BXJ9	NAA15	N-alpha-acetyltransferase 15, NatA auxiliary subunit	7	5.70093	5.52263	5.48358	5.45038	5.55082	5.47699	5.47997	5.62602	5.56124	5.60035	5.47151	5.33453	5.73086	5.76588	5.63296	5.56718	5.46127	5.58291
Q9NVV4	MTPAP	Poly(A) RNA polymerase, mitochondrial	7	5.55907	5.53158	5.3981	5.58761	5.57285	5.9148	5.3279	5.38082	5.50661	5.55146	5.4208	5.99938	5.53982	5.6991	5.46026	5.63579	5.36643	5.54762
Q6VMQ6-4	ATF7IP	Isoform 3 of Activating transcription factor 7-interacting protein 1	7	5.59086	5.14407	5.74986	5.62398	5.53596	5.19012	5.5708	5.82344	5.47991	5.46102	5.37912	5.55119	5.64861	5.59945	5.90587	5.57763	5.57107	5.59705
Q96DF8	ESS2	Splicing factor ESS-2 homolog	7	5.67147	5.39873	6.05258	5.5153	5.63623	5.88435	5.58366	4.76511	5.41308	5.19302	5.74468	5.46257	5.4749	5.67237	5.53514	5.18205	6.26859	5.54616
P38919	EIF4A3	Eukaryotic initiation factor 4A-III	7	5.74251	5.69504	5.32897	5.48851	5.80036	5.84938	5.88621	6.11032	5.43362	5.55852	5.48796	5.4332	5.6393	5.81515	5.10399	5.74363	5.00802	4.87532
P30040	ERP29	Endoplasmic reticulum resident protein 29	7	5.52785	5.62081	5.57248	5.46077	6.11361	5.62415	5.38083	5.47834	5.54715	5.8101	5.56454	5.23471	5.76775	5.94518	5.71418	5.58571	5.02301	5.02882
P30101	PDIA3	Protein disulfide-isomerase A3	7	5.41432	5.70277	5.5053	5.57027	5.37898	5.5994	5.86238	5.48479	5.69444	5.67925	5.39453	5.31354	5.47244	5.58926	5.37823	5.61178	5.60713	5.7412
Q8WYA6	CTNNBL1	Beta-catenin-like protein 1	7	5.16901	5.3514	5.66146	5.56503	5.6951	5.4688	5.69054	5.48531	5.62143	5.33938	5.75176	5.5576	5.68176	5.79175	5.72342	5.50841	5.38391	5.55394
P55795	HNRNPH2	Heterogeneous nuclear ribonucleoprotein H2	7	5.20925	5.36148	5.81056	5.65746	5.56951	5.23422	5.65637	5.52965	5.5286	5.3936	5.75565	5.62287	5.79105	5.51475	5.75238	5.52339	5.51839	5.57083
P78332	RBM6	RNA-binding protein 6	7	5.77431	5.15421	5.51587	5.52675	5.87304	5.42662	5.91908	5.13283	5.54718	5.44649	5.53958	5.42412	5.68279	5.27885	5.76691	5.59561	6.07608	5.31969
P37802-2	TAGLN2	Isoform 2 of Transgelin-2	7	5.32712	5.88081	5.59211	5.39037	5.96643	5.59769	5.80188	5.20215	5.49783	5.67735	5.6019	5.71143	5.68461	5.7102	5.3821	5.77663	5.19951	4.9999
O95453	PARN	Poly(A)-specific ribonuclease PARN	7	5.5146	5.83036	5.77375	5.51916	6.00496	5.46799	5.42046	5.94572	5.70001	5.5337	5.37401	5.11577	5.25666	5.55724	5.56036	5.65138	5.53706	5.23681
P12956	XRCC6	X-ray repair cross-complementing protein 6	7	5.46644	5.29963	5.60119	5.35694	5.41542	5.68598	5.35249	5.48701	5.51896	5.46103	5.53186	5.58981	5.69454	5.51651	5.65154	5.64805	5.66852	6.05409
O14757	CHEK1	Serine/threonine-protein kinase Chk1	7	5.4462	5.75581	5.46258	5.52826	5.60071	5.50645	5.46866	5.33849	5.54879	5.70881	5.13219	5.53386	5.95814	5.6101	5.78626	5.78958	5.24132	5.5838
Q29RF7	PDS5A	Sister chromatid cohesion protein PDS5 homolog A	7	5.47834	5.65418	5.63592	5.42776	5.44368	5.74707	5.69791	6.00189	5.31836	5.66654	5.64258	5.14075	5.33655	5.50141	5.3465	5.69613	5.44148	5.82295
P49902	NT5C2	Cytosolic purine 5'-nucleotidase	7	5.55582	5.67642	5.59378	5.66981	5.55075	5.73663	5.54552	5.59723	5.35449	5.53564	5.39962	5.63122	5.40369	5.51097	5.5164	5.66612	5.35152	5.70437
Q96AG4	LRRC59	Leucine-rich repeat-containing protein 59	7	5.44089	5.35317	5.57088	5.70119	5.14413	5.48194	5.41235	5.50194	5.33869	5.70538	5.45863	5.55471	5.48469	6.19038	5.60546	5.46538	5.90925	5.68093
Q9BZZ5	API5	Apoptosis inhibitor 5	7	5.61155	5.49301	5.45138	5.55562	5.40583	5.50415	5.39542	5.73766	5.53114	5.54032	5.67135	5.44386	5.28491	5.80005	5.65706	5.688	5.60339	5.62532
Q13523	PRPF4B	Serine/threonine-protein kinase PRP4 homolog	7	5.53988	5.69573	5.39831	5.6471	5.34007	5.42959	5.63131	5.6026	5.72433	5.70092	5.49751	5.45747	5.51459	5.56472	5.59288	5.5214	5.55216	5.58942
O43324	EEF1E1	Eukaryotic translation elongation factor 1 epsilon-1	7	5.7991	5.38846	5.34083	5.70674	5.53158	5.54509	5.23175	5.67149	5.46044	5.87644	5.42526	5.58009	6.04438	5.68866	5.4563	5.45377	5.47672	5.32292
P20248	CCNA2	Cyclin-A2	7	5.75629	5.13219	5.43586	5.57133	5.48822	5.23755	5.21211	5.49754	5.50492	5.60086	6.03291	5.58007	5.4298	5.46893	5.633	5.68055	5.91703	5.82085
P08575	PTPRC	Receptor-type tyrosine-protein phosphatase C	7	5.51745	5.40654	5.73651	5.30454	5.8534	5.7355	5.55748	5.4252	5.8484	5.45201	5.97954	5.57826	5.25661	5.30134	5.3897	5.80655	5.33259	5.51838
Q8N766	EMC1	ER membrane protein complex subunit 1	7	5.74221	5.63896	5.71401	5.41463	5.38121	5.65782	5.42156	5.56319	5.66249	5.31797	5.81995	5.58325	5.52646	5.23497	5.58036	5.61162	5.381	5.74833
Q9UBD5-2	ORC3	Isoform 2 of Origin recognition complex subunit 3	7	5.28694	5.47171	5.5149	5.40747	5.40814	5.67562	5.35243	5.52608	5.84474	5.88742	5.51432	5.30914	5.56534	5.62265	5.63492	5.9605	5.44473	5.57294
Q6RFH5	WDR74	WD repeat-containing protein 74	7	5.45834	5.37922	5.79806	5.11009	5.84932	5.56427	5.80058	5.60905	5.93733	5.36696	5.54967	5.74778	5.62653	5.44063	5.66875	5.43495	5.42006	5.23841
Q53EL6	PDCD4	Programmed cell death protein 4	7	5.42783	5.10262	5.07823	5.7334	5.22542	5.8091	5.61208	5.90993	5.31096	5.46599	5.20578	5.60704	5.96309	5.45772	5.63135	5.80162	5.63402	6.02382
Q8ND24	RNF214	RING finger protein 214	7	5.54059	5.65342	5.51826	5.64503	5.37029	5.61348	5.424	5.48933	5.76267	5.50725	5.28222	5.32429	5.55062	5.56466	5.65508	5.80506	5.52824	5.76551
Q96D46	NMD3	60S ribosomal export protein NMD3	7	5.73249	5.62631	5.44544	5.49225	5.5437	5.59993	5.45971	5.86321	5.3462	5.61918	5.54162	5.69316	5.6416	5.61608	5.53182	5.57545	5.00716	5.66467
Q8NBJ5	COLGALT1	Procollagen galactosyltransferase 1	7	6.00303	5.5764	5.73953	5.5751	5.39726	5.60923	5.03215	5.25565	5.79971	5.28116	5.76238	5.78429	5.66234	5.25356	5.46142	5.40567	5.80217	5.59895
P52948	NUP98	Nuclear pore complex protein Nup98-Nup96	7	5.68033	5.52788	5.41184	5.33037	5.25808	5.1629	5.88401	5.36083	5.94634	5.69754	5.41936	6.12156	5.25172	5.61551	5.59721	5.47839	5.6642	5.59192
Q9UL63	MKLN1	Muskelin	7	5.40493	5.55075	5.50861	5.55592	5.69924	5.37101	5.43131	5.54682	5.60515	5.5178	5.78931	5.55947	5.28988	5.51359	5.54406	5.76088	5.54	5.81126
Q7Z478	DHX29	ATP-dependent RNA helicase DHX29	7	5.73604	5.71719	5.55739	5.3615	5.74105	5.73845	5.50846	5.5605	5.52321	5.42238	5.55602	5.46618	5.46818	5.55417	5.8383	5.40592	5.1977	5.64737
Q96N67	DOCK7	Dedicator of cytokinesis protein 7	7	5.933	5.88945	5.69232	5.30836	5.06096	5.85668	5.30236	5.77246	5.79492	5.65671	5.55959	5.71984	4.99521	5.21865	5.25523	5.60198	5.70484	5.67745
Q8NE71	ABCF1	ATP-binding cassette sub-family F member 1	7	5.37482	6.0561	5.11528	5.44312	5.40908	5.65435	5.55059	5.76448	5.33081	6.12165	5.17912	5.47426	5.57559	5.72171	5.67767	5.60043	5.1353	5.81562
Q7L2H7	EIF3M	Eukaryotic translation initiation factor 3 subunit M	7	5.39361	5.47397	5.90755	5.24238	5.56	5.8597	5.6614	5.44006	5.61376	5.26836	5.31312	5.59754	5.67881	5.27274	5.88464	5.90903	5.38882	5.53451
Q15185	PTGES3	Prostaglandin E synthase 3	7	5.29369	5.87477	5.60007	5.76057	5.73633	5.69122	5.73078	4.98896	5.60044	6.04282	5.59521	5.7026	5.53624	5.87325	5.51082	5.82414	4.96713	4.67096
O43395	PRPF3	U4/U6 small nuclear ribonucleoprotein Prp3	7	6.00837	5.41954	4.9471	5.53121	5.76489	5.32862	5.80102	5.68731	5.54545	5.77207	5.46494	5.34551	5.67681	5.46098	5.31643	5.54376	5.97226	5.41372
P33527-9	ABCC1	Isoform 9 of Multidrug resistance-associated protein 1	7	5.72708	5.52165	5.82522	5.56608	5.3901	5.36626	5.5732	5.71822	5.70438	5.37517	5.34549	5.41583	5.31661	5.32849	5.63986	5.57543	5.75492	5.85601
P52788	SMS	Spermine synthase	7	5.4638	5.66361	5.46356	5.27386	5.63062	5.67526	5.62833	5.59548	5.72123	5.4287	5.30012	5.35036	5.88262	5.68558	5.53897	5.70166	5.62436	5.37189
O94966-5	USP19	Isoform 5 of Ubiquitin carboxyl-terminal hydrolase 19	7	5.89424	5.51263	5.61314	5.51168	5.52773	5.74783	5.45339	5.20078	5.39611	5.62677	5.5549	5.36749	5.93097	5.34643	5.61686	5.26442	5.7019	5.73274
P53384	NUBP1	Cytosolic Fe-S cluster assembly factor NUBP1	7	5.52693	5.65203	5.62705	5.69675	5.57668	5.3627	5.4503	5.21691	5.63528	5.43129	5.55446	5.723	5.75323	5.6074	5.56587	5.32825	5.68403	5.60785
P18031	PTPN1	Tyrosine-protein phosphatase non-receptor type 1	7	5.56519	5.62559	5.94639	5.43185	5.94784	5.5056	5.71227	5.64958	5.87957	5.33599	5.46697	5.41913	5.21522	5.46562	5.72947	5.33826	5.48259	5.28288
O15164	TRIM24	Transcription intermediary factor 1-alpha	7	5.25353	5.56642	5.54391	5.56281	5.21987	5.93414	5.28562	5.77131	5.16423	5.64842	5.40768	5.70943	5.31698	5.77056	5.5932	5.946	5.448	5.85788
Q13148	TARDBP	TAR DNA-binding protein 43	7	5.69687	5.6049	5.53841	5.40499	5.61763	5.77188	5.30129	5.48854	5.60944	5.39643	5.57902	5.41581	5.65922	5.39072	5.34076	5.60085	5.71812	5.86512
Q8N6R0	EEF1AKNMT	eEF1A lysine and N-terminal methyltransferase	7	5.69144	5.66553	5.42384	5.78093	5.63953	5.75442	5.5775	5.72689	5.5263	5.2967	5.61076	5.35836	5.44427	5.49641	5.53443	5.21917	5.90302	5.35051
P49642	PRIM1	DNA primase small subunit	7	5.40843	5.45846	5.67103	5.37216	5.51669	5.32581	5.59523	5.49095	5.46858	5.4009	5.82545	5.59123	5.86901	5.58301	5.71883	5.4746	5.66202	5.56761
Q92925	SMARCD2	SWI/SNF-related matrix-associated actin-dependent regulator of chromatin subfamily D member 2	7	6.21948	5.08586	5.27375	5.64411	5.37305	5.33331	5.14467	6.50288	5.73592	5.11237	5.22177	5.08321	5.17891	5.12316	5.7489	5.16386	6.51612	6.53864
Q9BWU0	SLC4A1AP	Kanadaptin	7	5.62591	5.63651	5.69793	5.66015	5.29111	5.34434	5.40687	5.26534	5.67075	5.54509	5.81391	5.57963	5.46157	5.3718	5.45235	5.8116	5.42925	5.9359
Q7L1V2	MON1B	Vacuolar fusion protein MON1 homolog B	7	5.27086	5.37403	5.33735	5.69563	5.5718	5.45326	5.49182	6.00764	5.65793	5.5459	5.52514	5.32296	5.48264	5.75239	5.66893	5.3355	5.57103	5.93518
Q8TEK3-1	DOT1L	Isoform 2 of Histone-lysine N-methyltransferase, H3 lysine-79 specific	7	5.19657	5.18698	5.92204	5.62913	5.60672	5.82262	5.6431	5.52448	5.43476	5.26037	5.72692	5.59622	5.23541	5.55781	5.93057	5.52518	5.4793	5.72184
O96019	ACTL6A	Actin-like protein 6A	7	5.40796	5.63355	5.42296	5.84854	5.49019	5.27715	5.26646	5.43339	5.53319	5.52829	5.87194	5.99119	5.54417	5.4499	5.62629	5.78547	5.42839	5.46096
Q15031	LARS2	Probable leucine--tRNA ligase, mitochondrial	7	5.99318	6.1459	5.15472	5.68931	5.50995	5.52824	5.71574	5.70142	5.52583	5.22526	5.36752	5.44098	5.79265	5.68807	5.25118	5.53161	5.28256	5.45586
Q9H0K6	PUS7L	Pseudouridylate synthase 7 homolog-like protein	7	5.6249	5.5643	5.65286	5.77167	5.70462	5.61752	5.38099	5.53249	5.28432	5.46058	5.73322	5.72341	5.41799	5.44967	5.22253	5.54823	5.39559	5.91511
Q9H9T3	ELP3	Elongator complex protein 3	7	5.5131	5.30136	5.63524	5.83716	5.64648	5.68213	5.56488	5.85753	5.61101	5.67398	5.33562	5.71707	5.42329	5.43947	5.4137	5.58656	5.30893	5.45249
Q6YHU6	THADA	Thyroid adenoma-associated protein	7	5.47169	5.76909	5.67508	5.91865	5.65939	5.41908	5.43475	5.57717	5.65285	5.33901	5.41707	5.37522	5.51422	5.43381	5.56831	5.58799	5.78236	5.40426
Q70J99-3	UNC13D	Isoform 3 of Protein unc-13 homolog D	7	5.43821	5.57425	5.77411	5.59355	5.54294	5.73916	5.47537	5.19732	5.45754	5.56263	5.79402	5.67434	5.4177	5.46244	5.49576	5.69666	5.47595	5.62804
P14735	IDE	Insulin-degrading enzyme	7	5.39527	5.86493	5.57825	5.76448	5.46108	5.57371	5.34888	5.57155	5.556	5.59795	5.6579	5.70562	5.70818	5.76329	5.54283	5.42077	5.12439	5.36493
Q92576	PHF3	PHD finger protein 3	7	5.8299	5.70871	5.52271	5.57108	5.59925	5.59483	5.46642	5.25261	5.48905	5.85	5.5762	5.58791	5.47655	5.43345	5.38486	5.4484	5.59082	5.61723
P35221-2	CTNNA1	Isoform 2 of Catenin alpha-1	7	5.29063	5.37547	5.76347	5.26822	5.32498	5.35522	5.53477	5.60407	5.55835	5.63554	5.84305	5.46311	5.55061	5.66328	5.72555	5.53578	5.8056	5.70229
A0A3B3IRW6	QSER1	Glutamine and serine-rich protein 1	7	5.52103	5.30232	5.85809	5.68744	5.417	5.42572	5.51271	5.27389	5.73985	5.67883	5.53984	5.50459	5.81446	5.33544	5.75804	5.68822	5.42172	5.5208
Q86UE4	MTDH	Protein LYRIC	7	5.6661	5.70321	5.38226	5.78016	5.40679	5.7231	5.42772	5.702	5.18735	5.88722	5.25546	5.45673	5.47631	5.8249	5.47701	5.68003	5.36637	5.59729
Q9Y6C9	MTCH2	Mitochondrial carrier homolog 2	7	6.34588	5.92058	5.65792	5.36303	5.7137	5.63175	5.26591	5.21954	5.66098	5.49172	5.56112	5.47137	5.65449	5.17853	5.48942	5.21371	5.85846	5.3019
P35611-3	ADD1	Isoform 3 of Alpha-adducin	7	5.42404	5.6155	5.55086	5.60215	5.52716	5.60808	5.68349	5.54598	5.43083	5.52201	5.48786	5.48034	5.29967	5.54414	5.89981	5.68993	5.38503	5.70315
Q15813-2	TBCE	Isoform 2 of Tubulin-specific chaperone E	7	5.49624	5.46424	5.42137	5.50477	5.58078	5.46104	5.75107	5.68178	5.45992	5.39442	5.5168	5.60934	5.50572	5.70867	5.64197	5.4585	5.61631	5.72705
P50395	GDI2	Rab GDP dissociation inhibitor beta	7	5.26727	5.72246	5.41757	5.81416	5.32369	5.49267	5.41745	5.74267	5.5502	5.4269	5.39356	5.41833	5.6789	5.58237	5.66085	5.92059	5.46329	5.70707
P15056	BRAF	Serine/threonine-protein kinase B-raf	7	5.40873	5.35658	5.75837	5.62125	5.28219	5.70719	5.54375	5.34864	5.43379	5.72352	5.61979	5.5337	5.54525	5.49451	5.42087	5.65532	5.88522	5.66135
P24752	ACAT1	Acetyl-CoA acetyltransferase, mitochondrial	7	5.38949	5.65836	5.56014	5.44247	5.62751	5.33794	5.7792	5.45704	5.74849	5.57682	5.45777	5.76687	5.7425	5.52469	5.61957	5.33874	5.53621	5.43619
Q15067-2	ACOX1	Isoform 2 of Peroxisomal acyl-coenzyme A oxidase 1	7	5.18451	5.46106	5.71195	5.53396	5.7414	5.37425	5.7002	5.49289	5.61707	5.41178	5.97088	5.71637	5.62455	5.46969	5.56832	5.44554	5.3773	5.59828
P69905	HBA1	Hemoglobin subunit alpha	7	5.36872	5.35733	5.50145	5.50788	5.53737	5.52259	5.63403	5.26127	5.48175	5.65564	5.74431	5.96276	5.76826	5.60273	5.69662	5.5061	5.22757	5.66363
P02008	HBZ	Hemoglobin subunit zeta	7	5.0522	5.80246	5.67542	5.61542	5.56706	5.66867	5.68887	5.55402	5.4709	5.5535	5.52763	5.84724	5.59407	5.36211	5.49269	5.15726	5.43388	5.93662
P19447	ERCC3	General transcription and DNA repair factor IIH helicase subunit XPB	7	5.58394	5.42895	5.54131	5.51128	5.46797	5.40777	5.50905	5.59786	5.40668	5.74141	5.69468	5.6492	5.5009	5.35782	5.68148	5.52108	5.72066	5.67793
Q12904-2	AIMP1	Isoform 2 of Aminoacyl tRNA synthase complex-interacting multifunctional protein 1	7	5.52236	5.61794	5.68589	5.66468	5.44893	5.47381	5.53776	5.484	5.6343	5.75859	5.61147	5.53469	5.65952	5.34225	5.46171	5.40556	5.80009	5.35646
O95573	ACSL3	Long-chain-fatty-acid--CoA ligase 3	7	4.87615	5.76371	5.65766	5.53926	5.53261	5.34382	5.53909	5.52792	5.36112	5.64328	5.73679	5.35745	5.4162	6.05511	5.52807	5.62266	5.55432	5.94478
B4DLN1	B4DLN1	cDNA FLJ60124, highly similar to Mitochondrial dicarboxylate carrier	7	5.42536	4.86019	5.83214	5.43992	5.61687	5.48132	5.71271	5.86872	5.76696	5.30932	5.27784	5.2424	5.8741	5.67345	5.65499	5.90209	5.29884	5.76279
P55809	OXCT1	Succinyl-CoA:3-ketoacid coenzyme A transferase 1, mitochondrial	7	5.18023	5.62545	5.40496	5.63811	5.58568	5.7985	5.5733	5.83073	5.26033	5.68032	5.3849	5.67664	5.4286	5.89136	5.57437	5.99084	5.04932	5.42637
Q8NFF5	FLAD1	FAD synthase	7	5.49462	5.58793	5.48429	5.6561	5.53674	5.43396	6.03506	5.66452	5.62361	5.37935	5.95457	5.03264	5.50024	5.31922	5.84689	5.26276	5.46228	5.72522
Q6IN85	PPP4R3A	Serine/threonine-protein phosphatase 4 regulatory subunit 3A	7	5.67242	5.55193	5.63504	5.60846	5.39252	5.7906	5.63686	5.66489	5.48471	5.62495	5.53041	5.55163	5.4073	5.52337	5.45556	5.57844	5.52064	5.37024
Q9Y2L5	TRAPPC8	Trafficking protein particle complex subunit 8	7	5.35122	5.63111	5.71022	5.70298	5.46383	5.67287	5.73	5.44816	5.55521	5.28918	5.46752	5.7081	5.7723	5.7322	5.5005	5.77432	5.23666	5.25361
P22694-2	PRKACB	Isoform 2 of cAMP-dependent protein kinase catalytic subunit beta	7	5.09853	5.58764	5.37106	5.82626	5.46234	5.61803	5.40156	5.58499	5.78905	5.64566	5.65244	5.56476	5.65467	5.55102	5.58531	5.20915	5.59452	5.80302
O75874	IDH1	Isocitrate dehydrogenase [NADP] cytoplasmic	7	5.55997	5.3774	5.40197	5.81467	6.11057	5.24766	5.57764	5.33146	5.64625	5.40983	5.53193	5.49998	5.83964	5.37721	5.5453	5.50369	5.49232	5.7325
P55735-3	SEC13	Isoform 3 of Protein SEC13 homolog	7	5.35814	5.42782	5.57643	5.50862	5.60618	5.36356	5.75054	5.52198	5.62986	5.48388	5.50407	5.50019	5.49402	5.64177	5.67001	5.65362	5.52796	5.78134
Q9UKM9	RALY	RNA-binding protein Raly	7	5.84066	5.88247	5.36617	5.32634	5.72007	5.79135	5.36818	6.10307	5.39743	5.82047	5.19405	5.46928	5.44663	5.78858	5.41378	5.58142	5.24982	5.24023
P07954	FH	Fumarate hydratase, mitochondrial	7	5.81977	5.66322	5.55607	5.43226	5.67988	5.52782	5.62653	5.68778	5.53905	5.55107	5.4776	5.35501	5.54637	5.72311	5.60394	5.61193	5.38959	5.209
P08397	HMBS	Porphobilinogen deaminase	7	5.41615	5.28023	5.59602	5.6473	5.62323	5.32942	5.24192	5.54721	5.60149	5.44909	5.73973	5.55891	5.7634	5.60416	5.74796	5.57817	5.54991	5.72571
P51003	PAPOLA	Poly(A) polymerase alpha	7	5.35838	5.3143	5.56576	5.34567	5.48312	5.3972	5.75712	5.75069	5.68562	5.58163	5.67547	5.55863	5.60455	5.31306	5.70649	5.43533	5.87221	5.59478
P62753	RPS6	40S ribosomal protein S6	7	5.6462	5.49562	5.60325	5.20986	5.48018	5.28906	5.53473	5.50144	5.54419	5.59478	5.72703	5.46843	5.67433	5.60405	5.7793	5.50203	5.65029	5.69524
Q99590	SCAF11	Protein SCAF11	7	5.50468	5.51066	5.56829	5.63046	5.5988	5.55464	5.49858	5.62564	5.45359	5.58882	5.53139	5.71975	5.37943	5.28451	5.5936	5.27287	5.9342	5.75008
Q8IWX8	CHERP	Calcium homeostasis endoplasmic reticulum protein	7	5.28763	5.1139	5.68811	5.51268	5.52595	5.2842	5.96225	5.19769	5.8737	5.50809	5.99772	5.60802	5.40646	5.22793	5.80702	5.43432	6.04364	5.52067
Q96JB2	COG3	Conserved oligomeric Golgi complex subunit 3	7	5.69881	5.39739	5.75237	5.50639	5.55965	5.43067	5.49008	5.35704	5.58178	5.44622	5.68296	5.32567	5.69243	5.56522	5.71655	5.66878	5.64553	5.48248
O14974	PPP1R12A	Protein phosphatase 1 regulatory subunit 12A	7	5.71074	5.56641	5.59105	5.78399	5.45799	5.50726	5.62833	5.66246	5.68255	5.57759	5.43161	5.44261	5.28815	5.31456	5.70187	5.54966	5.50736	5.59582
Q96KP4	CNDP2	Cytosolic non-specific dipeptidase	7	5.65575	5.54508	5.67743	5.54066	5.5924	5.59768	5.66561	5.46018	5.61708	5.49619	5.54514	5.6387	5.57419	5.5245	5.38832	5.6855	5.43903	5.35657
Q6P2H3	CEP85	Centrosomal protein of 85 kDa	7	5.52557	5.45698	5.61724	5.53424	5.38739	5.50905	5.99483	5.24809	5.52398	5.8602	5.78097	5.47128	5.82346	5.48132	5.45041	5.61773	5.26014	5.45713
P22087	FBL	rRNA 2'-O-methyltransferase fibrillarin	7	5.57518	5.43045	5.57723	5.63463	5.47268	5.76508	5.41377	5.7262	5.24742	5.6015	5.49223	5.47078	5.31466	5.70352	5.73858	5.82796	5.39679	5.61134
Q15637-5	SF1	Isoform 5 of Splicing factor 1	7	5.58041	5.59031	5.62407	5.44532	5.74384	5.52351	5.46694	5.33715	5.64826	5.55878	5.47944	5.42761	5.69603	5.41721	5.6324	5.64569	5.70468	5.47835
O15269	SPTLC1	Serine palmitoyltransferase 1	6	5.8065	5.48595	5.62133	5.59966	5.33375	5.47017	5.6203	5.79939	5.57858	5.32554	5.44261	5.48611	5.45475	5.50928	5.48954	5.63568	5.7691	5.57176
Q9UGR2	ZC3H7B	Zinc finger CCCH domain-containing protein 7B	6	5.68301	5.66711	5.77763	5.867	5.59293	5.41672	5.3265	5.50804	5.74689	5.47615	5.6136	5.58893	5.50863	5.16232	5.63556	5.56409	5.48759	5.37728
P07951	TPM2	Tropomyosin beta chain	6	5.15099	5.93656	5.52061	5.68894	5.66037	5.17126	5.52048	5.643	5.38578	5.61219	5.73645	5.47304	5.68057	6.026	5.72729	5.52769	5.05773	5.48105
P16989	YBX3	Y-box-binding protein 3	6	5.46712	5.44936	5.48122	5.30585	5.46631	5.59294	5.56454	5.41413	5.63823	5.40789	5.55446	5.42259	5.53112	5.48982	5.80226	5.61025	5.89063	5.9113
P12270	TPR	Nucleoprotein TPR	6	6.02367	5.20067	5.4887	5.39196	5.70879	5.63981	5.48474	5.56776	5.5618	5.41048	5.46184	5.40414	5.59982	5.31789	5.50333	5.61653	5.94452	5.67357
Q9UHV9	PFDN2	Prefoldin subunit 2	6	5.72886	5.63109	5.45551	5.34782	5.50569	5.29439	5.51468	5.51214	5.72701	5.53564	5.7645	5.38951	5.42876	5.53465	5.60719	5.34461	5.8573	5.82065
P16402	H1-3	Histone H1.3	6	8.03441	8.88118	6.36848	4.90049	5.06123	4.85628	5.43364	4.98263	5.11252	5.27627	5.40309	5.33501	5.17	5.04523	5.06627	4.96299	5.1495	4.96078
Q5T653	MRPL2	39S ribosomal protein L2, mitochondrial	6	5.53634	5.33798	5.60441	5.66359	5.6339	5.73098	5.26703	5.91119	5.62428	5.52475	5.71436	5.59567	5.58361	5.04311	5.52868	5.30814	5.95161	5.44038
O43432-3	EIF4G3	Isoform 3 of Eukaryotic translation initiation factor 4 gamma 3	6	5.28805	5.37782	5.80143	5.36831	5.79793	5.44704	5.61113	5.50246	5.49956	5.54532	5.43023	5.56802	5.37903	5.69594	5.6058	5.51045	5.90682	5.66465
P38935	IGHMBP2	DNA-binding protein SMUBP-2	6	6.1311	6.08548	5.29746	5.45842	5.8606	5.43216	5.48586	6.19369	5.70085	5.30267	5.71646	5.19752	5.48145	5.15863	5.4742	5.32942	5.1037	5.59034
Q9UIA9	XPO7	Exportin-7	6	5.80447	5.47549	5.38901	5.59391	5.61235	5.66263	5.46505	5.82715	5.66533	5.55685	5.56632	5.46752	5.32295	5.48024	5.48107	5.48646	5.49287	5.65033
Q9Y6E0	STK24	Serine/threonine-protein kinase 24	6	6.08461	5.68699	5.84154	5.69548	6.0048	5.69813	5.6686	5.3173	5.62681	5.54383	5.25084	5.194	5.5798	5.47347	5.69662	5.39307	5.07415	5.16996
Q7L2J0	MEPCE	7SK snRNA methylphosphate capping enzyme	6	5.89573	5.69177	5.65617	5.5408	5.50783	5.32745	5.63322	5.71548	5.42139	5.52956	5.58919	5.36703	5.67851	5.32893	5.41838	5.58656	5.68523	5.42678
O75694	NUP155	Nuclear pore complex protein Nup155	6	5.48299	5.43636	5.5125	5.73511	5.40121	5.31157	5.49704	5.79774	5.70551	5.57138	5.57584	5.73403	5.32517	5.4717	5.50271	5.65993	5.59298	5.68624
P05455	SSB	Lupus La protein	6	5.48827	5.64733	5.30908	5.60867	5.3402	5.58956	5.75925	5.52576	5.49434	5.53125	5.67469	5.44666	5.39486	5.75392	5.51024	5.54116	5.72448	5.66028
P13861	PRKAR2A	cAMP-dependent protein kinase type II-alpha regulatory subunit	6	5.39698	5.90731	5.27768	5.48744	5.55673	5.57791	5.55551	5.84689	5.57559	5.67673	5.29114	5.56813	5.71508	5.70473	5.43569	5.71629	5.22552	5.48467
P35612	ADD2	Beta-adducin	6	5.30363	5.61315	5.53325	5.86162	5.33016	5.47328	5.56491	5.45626	5.47727	5.66362	5.57047	5.66654	5.26273	5.75001	5.57539	5.51866	5.405	5.97403
Q96QK1	VPS35	Vacuolar protein sorting-associated protein 35	6	6.12122	5.96178	6.06056	5.94905	5.76944	5.48114	5.4039	5.4968	5.25602	5.36293	5.50937	5.48838	5.14648	5.52663	5.28974	5.54608	5.29217	5.33831
Q9Y6D9	MAD1L1	Mitotic spindle assembly checkpoint protein MAD1	6	5.61356	5.64221	5.54238	5.73462	5.58999	5.4386	5.6562	5.7026	5.57894	5.57072	5.47289	5.53189	5.67484	5.24316	5.52787	5.45956	5.55907	5.46088
Q7KZF4	SND1	Staphylococcal nuclease domain-containing protein 1	6	5.66284	5.59284	5.44287	5.63505	5.50975	5.19067	5.55159	5.64659	5.62266	5.60157	5.68617	5.55516	5.50895	5.37903	5.45668	5.89949	5.4741	5.58398
Q2NKX8	ERCC6L	DNA excision repair protein ERCC-6-like	6	5.72565	5.40299	5.51481	5.33409	5.51309	5.51	5.45505	5.55138	5.66737	5.46895	5.88763	5.41595	5.56934	5.43802	5.76985	5.44746	5.78527	5.5431
O75691	UTP20	Small subunit processome component 20 homolog	6	5.39185	5.51703	6.17353	5.63389	5.99103	5.61433	5.56753	5.25231	5.55934	5.81697	5.84586	5.24346	5.80639	4.94529	5.54005	5.31104	5.6529	5.13721
Q9UMR2	DDX19B	ATP-dependent RNA helicase DDX19B	6	5.40848	5.69272	5.42464	5.96554	5.21491	5.48738	5.92414	5.52584	5.33082	5.65618	5.86797	5.69988	5.59524	5.27828	5.59701	5.37949	5.33601	5.61546
P58107	EPPK1	Epiplakin	6	5.45668	5.73206	5.60614	5.45007	5.44076	5.58408	5.56459	5.79469	5.31852	5.15797	5.44851	5.86809	5.56839	5.56131	5.54843	5.57883	5.44632	5.87457
O14802	POLR3A	DNA-directed RNA polymerase III subunit RPC1	6	5.40678	5.40614	5.49898	5.57175	5.60511	5.58532	5.59838	5.4913	5.55907	5.54091	5.31604	5.57421	5.55609	5.51396	5.70816	5.94259	5.7464	5.37881
Q9BUQ8	DDX23	Probable ATP-dependent RNA helicase DDX23	6	5.88241	5.50592	5.67254	5.44486	5.26417	5.34171	5.49384	5.9648	5.92026	5.64987	5.36697	5.70464	5.28443	5.32864	5.48195	5.32936	5.52426	5.83937
Q8N3D4	EHBP1L1	EH domain-binding protein 1-like protein 1	6	5.63097	5.56019	5.30134	5.31433	5.81558	5.80054	5.57369	5.3374	5.47275	5.79658	5.9516	5.68352	5.56964	5.19749	5.25962	5.11128	5.81396	5.80952
O15020	SPTBN2	Spectrin beta chain, non-erythrocytic 2	6	5.17734	5.74455	5.47845	5.38763	5.064	5.18976	5.55861	5.78947	5.66703	5.63467	5.56917	5.83305	5.41769	5.55651	5.72599	5.58439	5.45693	6.16477
Q8TF05	PPP4R1	Serine/threonine-protein phosphatase 4 regulatory subunit 1	6	5.20655	5.79379	5.71156	5.67408	5.6521	5.12584	5.49889	5.59926	5.89656	5.46003	5.9778	5.54877	5.27252	5.22258	5.59745	5.40945	5.69104	5.66173
Q96I59	NARS2	Probable asparagine--tRNA ligase, mitochondrial	6	5.76926	5.82347	5.41274	5.46986	5.75162	6.12743	5.38333	5.65356	5.38796	5.64002	5.33487	5.48687	5.58261	5.66403	5.44472	5.62927	5.39123	5.04714
Q9BTC0	DIDO1	Death-inducer obliterator 1	6	5.69798	5.38667	5.56874	5.93979	5.47439	5.50572	5.43089	5.74457	5.41561	5.64271	5.53317	5.63521	5.24779	5.67568	5.45284	5.64718	5.26449	5.73657
Q86YP4-3	GATAD2A	Isoform 3 of Transcriptional repressor p66-alpha	6	5.55624	5.57568	5.38434	5.26545	5.45759	5.62918	5.47595	5.61768	5.53287	5.52737	5.56332	5.62775	5.74932	5.66551	5.58581	5.77039	5.3397	5.67585
O14647	CHD2	Chromodomain-helicase-DNA-binding protein 2	6	5.45294	5.48493	5.97477	5.49977	5.82712	5.0375	5.43692	5.59208	5.35329	5.23447	5.85597	5.5767	4.99443	5.41405	5.84269	5.53138	6.14853	5.74246
P48643	CCT5	T-complex protein 1 subunit epsilon	6	5.51115	5.62183	5.25152	5.51473	5.61098	5.55508	5.38063	5.39189	5.49196	5.81882	5.32777	5.77959	5.67931	6.12688	5.68142	5.55611	5.23521	5.46512
Q96FW1	OTUB1	Ubiquitin thioesterase OTUB1	6	5.04551	5.37596	5.57635	5.79336	5.50656	5.55521	5.48088	5.50012	5.69017	5.72363	5.66248	5.50579	5.69218	5.51221	5.58838	5.38793	5.4071	5.99618
P25205-2	MCM3	Isoform 2 of DNA replication licensing factor MCM3	6	5.24711	6.32429	5.82064	5.68742	5.73442	5.53171	5.62339	5.29528	5.09901	5.4045	5.80152	5.33571	5.48424	5.46726	5.82854	5.21916	5.52301	5.57279
P51531	SMARCA2	Probable global transcription activator SNF2L2	6	5.61676	5.26806	5.65519	5.48438	5.69971	5.25199	5.47906	5.42615	5.69342	5.54882	5.60325	5.5353	5.676	5.36106	5.59067	5.55397	5.8964	5.65982
Q99543	DNAJC2	DnaJ homolog subfamily C member 2	6	5.50641	5.92519	5.75021	5.71287	5.59265	5.68512	5.41781	5.82651	5.32257	5.60711	5.29799	5.50454	5.43426	5.58125	5.34558	5.4068	5.2553	5.82782
Q7Z4S6-4	KIF21A	Isoform 4 of Kinesin-like protein KIF21A	6	5.83536	5.4354	5.67762	5.32915	5.74507	5.03691	5.47778	5.46934	5.53677	5.23896	5.80604	5.55769	5.80289	5.44353	5.69693	5.41129	5.98264	5.51664
Q9Y4A5	TRRAP	Transformation/transcription domain-associated protein	6	5.34107	5.456	5.2996	5.93455	5.56272	5.40115	5.3559	5.76598	5.60935	5.59671	5.49844	5.87347	5.51954	5.35093	5.55471	5.59789	5.63864	5.64334
Q9HAU5	UPF2	Regulator of nonsense transcripts 2	6	5.58355	5.54859	5.44502	5.45888	5.53399	5.38093	5.59856	5.78916	5.59024	5.42945	5.44921	5.47176	5.81378	5.84451	5.80082	5.46172	5.24361	5.55619
Q9NZJ4	SACS	Sacsin	6	5.31823	5.39232	5.78039	5.84825	5.54079	5.79114	5.45853	5.84269	5.44233	5.57557	5.46054	5.51463	5.47392	5.45209	5.56278	5.512	5.43503	5.59877
Q14687	GSE1	Genetic suppressor element 1	6	5.73769	5.28087	5.87753	5.72258	5.61215	5.50956	5.72261	5.59559	5.54032	5.50967	5.54674	5.22285	5.43024	5.87557	5.59278	5.38503	5.35822	5.47999
Q7Z6B0	CCDC91	Coiled-coil domain-containing protein 91	6	5.5761	5.59049	5.39829	5.5059	5.21725	5.63813	5.3923	5.85701	5.493	5.61975	5.49032	5.99372	5.31725	5.48956	5.35242	5.66492	5.48681	5.91678
Q96P11-4	NSUN5	Isoform 4 of 28S rRNA (cytosine-C(5))-methyltransferase	6	5.5122	5.41043	5.54929	5.73331	5.71846	5.5701	5.57565	5.52379	5.52357	5.58215	5.35853	5.4159	5.46021	5.59754	5.47824	5.78661	5.62925	5.57476
P42338	PIK3CB	Phosphatidylinositol 4,5-bisphosphate 3-kinase catalytic subunit beta isoform	6	6.08604	5.92887	6.20339	5.93823	5.85456	5.85286	5.90122	5.69519	5.77228	5.60215	5.22522	5.19242	5.20623	4.89124	4.81178	5.03889	5.44735	5.35207
Q96S59	RANBP9	Ran-binding protein 9	6	5.22659	5.49626	5.81991	5.59072	5.67755	5.63481	5.52068	5.19294	5.70141	5.81588	5.57444	5.82109	5.48308	5.45746	5.42577	5.25687	5.42491	5.87963
Q8TD16-2	BICD2	Isoform 2 of Protein bicaudal D homolog 2	6	5.58116	5.69749	6.1948	5.38031	5.50158	5.33899	5.60506	5.54796	5.42965	5.36054	5.58602	5.28451	5.79515	5.21432	5.61502	5.54495	5.74294	5.57956
Q93050	ATP6V0A1	V-type proton ATPase 116 kDa subunit a1	6	5.57583	5.31449	5.87958	5.34735	5.55621	5.65213	5.52408	5.67789	4.96083	5.30677	5.52723	6.10815	5.39001	5.73919	5.89811	5.27491	5.44508	5.82219
P16104	H2AX	Histone H2AX	6	5.42543	5.59455	5.55529	5.34234	5.38769	5.60195	5.66568	5.70048	5.5584	5.53461	5.36411	5.59939	5.48103	5.59778	5.54627	5.55278	5.72217	5.77004
P55084	HADHB	Trifunctional enzyme subunit beta, mitochondrial	6	5.90077	5.68913	5.4407	5.6321	5.38317	5.87364	5.42049	5.89833	5.36693	5.55652	5.59109	5.56034	5.19581	5.68299	5.30994	5.40275	5.5744	5.52091
P35268	RPL22	60S ribosomal protein L22	6	5.56798	5.47755	5.39849	5.62467	5.49608	5.32999	5.74038	5.55735	5.25499	5.51486	5.56544	5.53868	5.89216	5.98563	5.48499	5.58671	5.61326	5.37079
Q13330	MTA1	Metastasis-associated protein MTA1	6	5.43967	5.54152	5.43705	5.52409	5.69333	5.54679	5.41805	5.48532	5.74108	5.59808	5.78492	5.62962	5.53336	5.47213	5.48411	5.31044	5.95372	5.40673
Q9NZM3	ITSN2	Intersectin-2	6	5.50545	5.67408	5.71209	5.56949	5.54197	5.61631	5.73019	5.53711	5.79516	5.77566	5.37621	5.64091	5.45436	5.31912	5.36205	5.62408	5.47814	5.28762
P00519-2	ABL1	Isoform IB of Tyrosine-protein kinase ABL1	6	5.5549	5.39076	5.63273	5.56599	5.543	5.44471	5.67386	5.61601	5.61211	5.40723	5.64355	5.53865	5.54336	5.55982	5.51789	5.52514	5.64631	5.58398
P16930-2	FAH	Isoform 2 of Fumarylacetoacetase	6	5.88767	5.63225	5.60997	6.24086	5.71186	5.73029	5.21027	5.06196	5.7641	5.65598	5.52418	5.28833	5.79607	5.61005	5.38426	5.10826	5.6205	5.16315
Q9Y4L1	HYOU1	Hypoxia up-regulated protein 1	6	5.51331	5.58129	5.68599	5.60448	5.60764	5.73958	5.54534	5.81343	5.76937	5.62076	5.1107	5.29817	5.42596	5.41096	5.54223	5.60832	5.48836	5.63411
Q4VXU2	PABPC1L	Polyadenylate-binding protein 1-like	6	5.58698	5.39354	5.4306	5.37442	5.70233	5.48399	5.84363	5.73152	5.63651	5.47314	5.70876	5.4521	5.57784	5.64415	5.6894	5.43429	5.45576	5.38104
P51617	IRAK1	Interleukin-1 receptor-associated kinase 1	6	5.27186	5.33904	5.51289	5.77862	5.69583	5.26506	6.07625	5.68554	5.17443	5.82733	5.81815	5.41737	5.52479	5.42323	5.64531	5.12324	5.3153	6.10576
Q02543	RPL18A	60S ribosomal protein L18a	6	5.80243	5.56109	5.53321	5.24809	5.58928	5.46834	5.60476	5.65176	5.72144	5.47912	5.57666	5.30035	5.58934	5.44176	5.64969	5.52531	5.74603	5.51135
P43034	PAFAH1B1	Platelet-activating factor acetylhydrolase IB subunit beta	6	5.49942	5.31109	5.39143	5.44865	5.78323	5.42935	5.85068	5.54906	5.27615	5.64042	5.54412	5.56178	5.7423	5.50822	5.46561	5.52271	5.73193	5.74386
P49736	MCM2	DNA replication licensing factor MCM2	6	5.59012	5.51592	5.78707	5.70649	5.44396	5.4597	5.60639	5.62009	5.30452	5.68047	5.83981	5.58665	5.39795	5.43369	5.38613	5.43074	5.55552	5.65478
Q13042	CDC16	Cell division cycle protein 16 homolog	6	5.21486	5.54444	5.63252	5.63075	5.55613	5.38601	5.5398	5.55404	5.7483	5.63133	5.73464	5.50989	5.76511	5.54729	5.63684	5.47924	5.39373	5.49508
Q96K76	USP47	Ubiquitin carboxyl-terminal hydrolase 47	6	5.43163	5.62898	5.62566	5.16329	5.56143	5.29234	5.5703	5.58216	5.51902	5.57329	5.75575	5.63301	5.804	5.59858	5.76042	5.41373	5.73123	5.35517
P61923-4	COPZ1	Isoform 4 of Coatomer subunit zeta-1	6	5.62198	5.36275	5.87998	5.64179	5.52826	5.31346	5.57697	5.51623	5.56556	5.4038	5.80129	5.62705	5.49844	5.7512	5.47023	5.53129	5.65319	5.25654
O14776	TCERG1	Transcription elongation regulator 1	6	6.05389	5.55275	5.73218	5.62625	5.42661	5.69606	5.51811	5.56403	5.89528	5.80516	5.69458	5.57583	5.35291	5.06996	5.33259	5.27674	5.55767	5.2694
P40938	RFC3	Replication factor C subunit 3	6	5.59139	5.20239	5.67501	5.315	5.63092	5.3151	5.73888	5.29413	5.95703	5.39535	5.94614	5.25378	5.68996	5.39231	5.74693	5.23639	6.08616	5.5331
P22307	SCP2	Sterol carrier protein 2	6	5.29264	5.7687	5.73036	5.54897	5.75274	5.25766	5.50453	5.42689	5.63337	5.58329	5.82068	5.59963	5.41383	5.66897	5.51662	5.22787	5.51003	5.74323
Q16512-2	PKN1	Isoform 2 of Serine/threonine-protein kinase N1	6	5.43646	4.97813	6.17361	5.89433	5.4096	5.23403	5.90367	5.56957	5.97737	5.28521	5.64214	5.46392	5.11514	5.51652	5.51554	5.47395	5.76594	5.64488
Q5VT25-6	CDC42BPA	Isoform 6 of Serine/threonine-protein kinase MRCK alpha	6	5.71819	5.51745	5.41556	5.58149	5.60553	5.49994	5.40784	5.49005	5.41557	5.68769	5.67611	5.54508	5.23372	5.62138	5.53817	5.80766	5.54895	5.68961
Q9Y3B8	REXO2	Oligoribonuclease, mitochondrial	6	5.55578	5.54622	5.70283	5.45073	5.66024	5.98493	5.52803	5.61283	5.52158	5.36983	5.12008	5.77183	5.45839	5.62445	5.19066	5.62513	5.56143	5.71504
Q9UID3	VPS51	Vacuolar protein sorting-associated protein 51 homolog	6	5.31302	5.66793	5.89896	5.62687	5.2848	5.62622	5.39374	5.86296	5.29228	5.34035	5.44304	5.53767	5.50172	5.54201	5.46793	5.71923	5.78034	5.70092
P35573	AGL	Glycogen debranching enzyme	6	5.7183	5.81887	5.42782	5.56623	5.6294	5.75635	5.50418	5.79515	5.73246	5.60846	5.34	5.58648	5.25867	5.70143	5.42035	5.31611	5.2989	5.52085
Q96BT3	CENPT	Centromere protein T	6	4.8004	5.66009	6.04537	5.64827	4.98022	5.43245	6.03469	4.861	5.47398	5.65789	5.85974	5.59639	5.40215	5.3742	5.34568	5.81697	6.15153	5.85899
O14686-3	KMT2D	Isoform 3 of Histone-lysine N-methyltransferase 2D	6	4.95844	5.30897	5.65612	5.63744	5.49216	5.66889	5.53795	5.51589	5.03689	5.28098	5.33716	5.52076	5.78387	5.87082	5.98675	6.03218	5.73167	5.64307
O43264	ZW10	Centromere/kinetochore protein zw10 homolog	6	5.80677	5.84612	5.4921	5.52744	5.86654	5.77309	5.53591	5.89842	5.23112	5.31194	4.78521	5.67555	5.46389	5.5904	5.54536	5.74611	5.49475	5.40926
P23219-5	PTGS1	Isoform 5 of Prostaglandin G/H synthase 1	6	5.61213	5.57049	5.34736	5.68704	5.35573	5.58296	5.56313	5.82205	5.54972	5.53231	5.49428	5.47406	5.58939	5.35807	5.81641	5.7516	5.69902	5.19427
Q9UM54	MYO6	Unconventional myosin-VI	6	5.64672	5.56474	5.38096	5.3466	5.73057	5.52269	5.57079	5.80868	5.7203	5.56188	5.58036	5.53642	5.57178	5.50301	5.4712	5.49156	5.41602	5.57571
P55265-4	ADAR	Isoform 4 of Double-stranded RNA-specific adenosine deaminase	6	5.41908	5.68052	5.47114	5.82583	5.48469	5.29399	5.31929	5.81481	5.55054	5.54036	5.52655	5.7075	5.46967	5.22401	5.30098	5.69273	5.91077	5.76757
Q14643	ITPR1	Inositol 1,4,5-trisphosphate receptor type 1	6	5.4111	5.56661	5.4995	5.70831	5.16347	5.60501	5.50531	5.40104	5.65751	5.88528	5.36987	5.46949	5.51787	5.70406	5.5893	5.48754	5.40795	6.0508
O75608	LYPLA1	Acyl-protein thioesterase 1	6	5.12158	5.46483	5.68394	5.18316	5.70092	5.43929	5.74982	5.36402	5.39874	5.54257	5.77886	5.84436	5.67777	5.6391	5.72261	5.71109	5.49557	5.48177
Q5VYS8	TUT7	Terminal uridylyltransferase 7	6	5.31573	5.54657	5.34637	5.99294	5.74487	5.81428	5.61149	6.00569	5.59617	5.60992	5.48014	5.61231	5.04329	5.76424	5.29699	5.25973	5.38613	5.57314
Q92896-2	GLG1	Isoform 2 of Golgi apparatus protein 1	6	5.45799	5.64135	5.59165	5.4941	5.57624	5.52442	5.50973	5.89973	5.65066	5.4948	5.20631	5.44139	5.54707	5.62901	5.65857	5.69785	5.60094	5.37817
Q7L576	CYFIP1	Cytoplasmic FMR1-interacting protein 1	6	5.70294	5.34109	5.56506	5.77066	5.37661	5.32873	5.38052	5.56502	6.01405	5.6132	5.61731	5.56723	5.26771	5.61503	5.59108	5.57383	5.49667	5.61325
Q96F07	CYFIP2	Cytoplasmic FMR1-interacting protein 2	6	5.79872	5.7595	5.57819	5.40443	5.48155	5.74545	5.39354	5.6026	5.55779	5.59037	5.58234	5.70081	5.46105	5.3553	5.36701	5.55398	5.43502	5.63235
Q8TAQ2	SMARCC2	SWI/SNF complex subunit SMARCC2	6	5.46822	5.49272	5.37245	5.27801	5.92866	5.50779	5.60662	6.07696	5.13673	5.64323	5.19641	5.53654	5.19165	5.44716	5.43312	6.08535	5.7379	5.8605
Q92922	SMARCC1	SWI/SNF complex subunit SMARCC1	6	5.09187	5.44362	5.70539	5.47602	5.36731	5.46826	5.74269	5.69115	5.71362	5.45384	5.5348	5.39959	5.46158	5.41789	5.87543	5.63575	5.98989	5.5313
O60749	SNX2	Sorting nexin-2	6	5.49037	5.51645	5.52673	5.75605	5.46518	5.41493	5.31223	5.75832	5.52154	5.57558	5.41895	5.58445	5.31353	5.55396	5.48199	5.77665	5.61586	5.91724
P08237-3	PFKM	Isoform 3 of ATP-dependent 6-phosphofructokinase, muscle type	6	5.86096	5.58848	5.58203	5.60917	5.89828	5.5925	5.4416	5.58099	5.47774	5.43714	5.4599	5.49189	5.53685	5.47224	5.42963	5.5512	5.50754	5.48183
Q9H4L5	OSBPL3	Oxysterol-binding protein-related protein 3	6	5.71041	5.4521	5.56948	5.77169	5.57227	5.62205	5.48646	5.42648	5.37225	5.28319	5.72548	5.47085	5.75935	5.58317	5.59721	5.5421	5.63382	5.42164
P55010	EIF5	Eukaryotic translation initiation factor 5	6	5.45404	5.55728	5.49849	5.61098	5.59838	5.56448	5.71842	5.58909	5.71658	5.5251	5.4395	5.2129	5.64359	5.57488	5.6071	5.54937	5.58738	5.55242
Q16698	DECR1	2,4-dienoyl-CoA reductase [(3E)-enoyl-CoA-producing], mitochondrial	6	5.60895	5.40093	6.03494	5.53555	5.50806	5.69977	5.60593	5.51749	5.74784	5.55086	5.53041	5.11165	5.54601	5.59855	5.18478	5.20137	5.86018	5.75674
P26368	U2AF2	Splicing factor U2AF 65 kDa subunit	6	5.3231	5.78516	5.40094	5.19618	5.67568	5.48963	5.734	5.2428	5.76824	5.57911	5.10377	5.50042	5.43543	5.69948	5.48945	5.72561	6.14048	5.71053
Q86XP3	DDX42	ATP-dependent RNA helicase DDX42	6	5.57872	5.40473	5.29677	5.53435	5.68596	5.59642	5.55708	5.54256	5.6367	5.5117	5.53835	5.56676	5.62214	5.55008	5.68017	5.51577	5.68522	5.49651
O94762	RECQL5	ATP-dependent DNA helicase Q5	6	5.67933	5.34855	5.6388	5.35023	5.60489	5.20085	5.42799	5.40457	5.74911	5.46953	5.41718	5.62745	5.82592	5.33353	5.58942	5.74194	6.09195	5.49875
Q9H270	VPS11	Vacuolar protein sorting-associated protein 11 homolog	6	5.59488	5.56251	5.62043	5.48584	5.56811	5.44646	5.53622	5.73865	5.62934	5.55302	5.4207	5.63281	5.53032	5.44784	5.36212	5.48004	5.69313	5.69758
Q3SY69	ALDH1L2	Mitochondrial 10-formyltetrahydrofolate dehydrogenase	6	5.465	4.98726	5.17018	5.40497	5.45012	5.43503	5.43521	5.53979	5.48881	5.57985	5.891	5.77096	5.71384	5.39742	5.9131	5.86597	5.67835	5.81314
O43719	HTATSF1	HIV Tat-specific factor 1	6	5.45823	5.37656	5.73618	5.49961	5.48277	5.45473	5.7289	5.56911	5.77205	5.47209	5.61725	5.53182	5.57933	5.29555	5.51237	5.53555	5.71672	5.66118
Q5THJ4	VPS13D	Vacuolar protein sorting-associated protein 13D	6	5.67776	5.40881	5.46884	5.27347	5.56552	5.62437	5.52452	5.54097	5.52802	5.21109	5.67787	5.34134	5.59775	5.51112	5.50037	5.43026	6.26031	5.85761
Q9BPX3	NCAPG	Condensin complex subunit 3	6	5.58324	5.49935	5.61124	5.74147	5.51935	5.5034	5.7662	5.51952	5.43519	5.35346	5.63566	5.50691	5.64425	5.19663	5.70457	5.21839	5.84305	5.71811
P21675-4	TAF1	Isoform 4 of Transcription initiation factor TFIID subunit 1	6	5.53823	5.48338	5.30626	5.86776	5.72474	5.41959	5.73919	5.72816	5.82831	5.35879	5.46903	5.64803	5.40539	5.26127	5.4618	5.54168	5.68285	5.53553
P51812	RPS6KA3	Ribosomal protein S6 kinase alpha-3	6	5.73551	5.35972	5.6706	5.5945	5.60917	5.46737	5.74543	5.50925	5.67761	5.40948	5.71598	5.29741	5.42192	5.31192	5.60629	5.49471	5.73953	5.63362
P30086	PEBP1	Phosphatidylethanolamine-binding protein 1	6	5.45442	5.6941	5.70448	6.14891	5.69709	5.79566	5.54746	5.23724	5.75999	5.59059	5.66318	5.57418	5.76757	5.59243	5.81185	4.97546	4.96839	5.017
O95758-4	PTBP3	Isoform 4 of Polypyrimidine tract-binding protein 3	6	5.68922	5.47469	5.63801	5.61438	5.57186	5.74899	5.58338	5.59618	5.43794	5.64997	5.3524	5.50664	5.63468	5.61164	5.63619	5.6482	5.21635	5.38929
Q9BYW2	SETD2	Histone-lysine N-methyltransferase SETD2	6	5.88616	5.41159	5.74016	5.49384	5.71949	5.72251	5.30896	5.81968	5.55192	5.49424	5.43438	5.32143	5.44896	5.66922	5.3053	5.85271	5.35547	5.46396
Q12788	TBL3	Transducin beta-like protein 3	6	5.37626	5.84359	5.66462	6.02886	5.02352	5.56457	5.77857	5.60159	5.37782	5.669	5.67615	5.59436	5.63528	5.52194	5.40909	5.34761	5.26407	5.62312
Q27J81	INF2	Inverted formin-2	6	5.57136	5.77809	5.79814	5.53761	5.16603	5.51202	5.70632	5.58057	5.5806	5.70822	5.42543	5.61823	5.68276	5.21277	5.80045	5.48652	5.43158	5.40328
Q9H0D6	XRN2	5'-3' exoribonuclease 2	6	5.3696	5.37246	5.92191	5.89143	5.22497	5.51895	5.65411	5.15533	5.73337	5.39007	5.58884	5.7432	5.82117	5.71059	5.21279	5.80261	5.43064	5.45797
O43426	SYNJ1	Synaptojanin-1	6	5.43241	5.83422	5.22911	5.9108	5.74778	5.92388	5.68122	4.85721	5.3675	5.81877	5.68638	5.82176	5.64777	5.94641	5.34146	5.76903	5.10025	4.88404
P62917	RPL8	60S ribosomal protein L8	6	5.52373	5.607	5.57291	5.53173	5.51617	5.70089	5.56192	5.74405	5.40942	5.76183	5.57916	5.372	5.54698	5.69174	5.63865	5.55622	5.37339	5.31223
Q15019-2	SEPTIN2	Isoform 2 of Septin-2	6	5.79665	5.20718	5.57939	5.4827	5.5977	5.74732	5.40289	5.36231	5.53464	5.60748	5.56232	5.69241	5.51967	5.66225	5.43859	5.71021	5.64248	5.45383
Q9H4L7-2	SMARCAD1	Isoform 2 of SWI/SNF-related matrix-associated actin-dependent regulator of chromatin subfamily A containing DEAD/H box 1	6	5.59804	5.71884	5.67012	5.88389	5.55258	5.58439	5.60661	5.61127	5.52156	5.73355	5.44084	5.31843	5.32447	5.47399	5.10856	5.59299	5.64639	5.61348
Q02878	RPL6	60S ribosomal protein L6	6	5.30524	5.71994	5.42265	5.42236	5.91745	5.37003	6.01543	5.8725	5.67086	5.23958	5.80739	5.31391	5.62809	5.45638	5.4313	5.3281	5.54692	5.53189
Q9Y5B6	PAXBP1	PAX3- and PAX7-binding protein 1	6	5.76132	5.44458	5.81438	5.44097	5.74819	5.37021	5.76036	5.84611	5.48256	5.69288	5.77164	5.23571	5.28451	5.37243	5.62903	5.35372	5.53257	5.45881
P48163	ME1	NADP-dependent malic enzyme	6	5.49873	5.60887	5.68874	5.28804	5.67564	5.81132	5.83876	5.38542	5.74592	5.3794	5.53601	5.18851	5.84866	5.45249	5.27098	5.51417	5.56411	5.70423
Q9H6S0	YTHDC2	3'-5' RNA helicase YTHDC2	6	5.51984	5.85068	5.57635	5.58284	5.93952	5.56154	5.51614	5.54338	5.71537	5.59724	5.7291	5.35685	5.56405	5.28718	5.18163	5.73721	5.26877	5.47231
O94973-2	AP2A2	Isoform 2 of AP-2 complex subunit alpha-2	6	5.31882	5.50373	5.50913	5.64728	5.44624	5.80444	5.3866	5.64094	5.48608	5.6258	5.37964	5.61664	5.55469	5.8425	5.28195	5.67478	5.33765	5.94309
Q9NQW6	ANLN	Anillin	6	5.67792	5.7633	5.55896	5.60716	5.8208	5.69991	5.43653	5.70722	5.39462	5.47203	5.37552	5.53383	5.52113	5.72075	5.59052	5.50753	5.1753	5.43698
O75521	ECI2	Enoyl-CoA delta isomerase 2	6	5.74365	5.6524	5.78892	5.78515	5.78588	5.59185	5.48274	5.70445	5.48049	5.44545	5.32324	5.34589	5.34537	5.35506	5.52587	5.44594	5.88102	5.31663
Q7L2E3-2	DHX30	Isoform 2 of ATP-dependent RNA helicase DHX30	6	5.60524	5.59623	5.3741	5.37764	5.27112	5.24725	5.43278	5.78733	5.54941	5.68062	5.79353	5.69578	5.43565	5.68009	5.66721	5.47673	5.72033	5.60897
Q13111	CHAF1A	Chromatin assembly factor 1 subunit A	6	5.29107	5.49336	5.27038	5.49335	5.79589	5.38453	5.74199	5.38919	5.65105	5.50757	5.45509	5.65696	5.92538	5.33266	5.74075	5.65107	5.5521	5.66762
Q9Y276	BCS1L	Mitochondrial chaperone BCS1	6	5.25578	5.41096	5.57367	5.37125	5.66325	5.43312	5.60287	5.32131	5.30603	5.65691	5.89206	5.68245	5.65023	5.57731	5.72703	5.46192	5.64841	5.76543
Q14677-3	CLINT1	Isoform 3 of Clathrin interactor 1	6	5.45951	5.40015	5.75783	5.62517	5.69795	5.64717	5.7943	5.39333	5.4254	5.57308	5.5143	5.37304	5.54235	5.2426	5.86656	5.49198	5.79329	5.40198
P54198	HIRA	Protein HIRA	6	6.15939	5.91718	5.59295	5.42254	5.17735	5.61125	5.97792	5.73354	5.66248	5.4584	5.42453	5.56738	5.08235	5.239	5.02237	5.80035	5.5061	5.64492
Q8N4C8	MINK1	Misshapen-like kinase 1	6	5.54294	5.55879	5.77165	5.71564	5.62579	5.72566	5.58732	5.48894	5.61386	5.68112	5.50264	5.31201	5.38428	5.4536	5.57312	5.46866	5.45961	5.53436
P57737-3	CORO7	Isoform 3 of Coronin-7	6	5.91157	5.91597	5.02762	5.54044	5.5861	5.61556	5.54312	5.74759	5.62305	5.57331	6.18537	5.56562	5.068	5.84469	5.24506	5.22189	5.4692	5.31583
O60885	BRD4	Bromodomain-containing protein 4	6	5.67804	4.95542	5.78082	5.22518	5.92581	5.47303	5.62109	5.23975	5.6926	5.535	5.73735	5.32178	5.62203	5.07809	5.9089	5.83013	5.67908	5.69588
O00429-6	DNM1L	Isoform 6 of Dynamin-1-like protein	6	5.79231	5.0191	5.69093	5.66855	5.58223	5.32741	5.62789	5.45459	6.10818	5.4165	5.74803	5.72166	5.49372	5.01829	5.61035	5.41594	5.95463	5.3497
Q96EK7	FAM120B	Constitutive coactivator of peroxisome proliferator-activated receptor gamma	6	5.80512	5.74391	5.57425	5.62789	5.04796	5.49319	5.59427	5.94397	5.93466	5.17016	5.24096	6.05495	5.50845	5.28634	5.40243	5.73928	5.70024	5.13196
Q9UBB9	TFIP11	Tuftelin-interacting protein 11	6	5.63139	5.37957	5.57787	5.75145	5.48635	5.4735	5.25364	5.51129	5.7524	5.73536	5.61654	5.82522	5.39956	5.46686	5.45596	5.3728	5.77143	5.5388
P31946	YWHAB	14-3-3 protein beta/alpha	6	5.17437	5.29076	5.70592	5.55946	5.54993	5.22111	5.80708	5.14656	5.67338	5.51942	5.78928	5.47761	5.79825	5.51812	5.7886	5.42683	5.92848	5.62484
P62258	YWHAE	14-3-3 protein epsilon	6	5.9843	5.33798	5.90182	5.83883	5.55118	5.343	5.76338	5.48125	5.12215	5.20408	5.49614	5.54121	5.54165	5.28434	5.76324	5.40982	5.88349	5.55213
P15170-3	GSPT1	Isoform 3 of Eukaryotic peptide chain release factor GTP-binding subunit ERF3A	6	5.87298	5.72	5.60299	5.93145	5.61214	5.66183	5.47669	5.87843	5.42103	5.20216	5.32645	5.62339	5.08165	5.63942	5.2133	5.44199	5.74883	5.54528
Q9H939	PSTPIP2	Proline-serine-threonine phosphatase-interacting protein 2	6	5.25018	5.31762	5.56316	5.29857	5.29708	5.48657	5.3022	5.26931	5.56014	5.46053	5.72362	5.87996	5.81317	5.50263	5.67606	5.72515	5.70369	6.17036
P27694	RPA1	Replication protein A 70 kDa DNA-binding subunit	6	5.39641	5.28253	5.45078	5.52603	5.63092	5.4039	5.67497	5.29871	5.64112	5.59283	5.61796	5.77669	5.62403	5.54535	5.64953	5.66535	5.47087	5.75203
Q9H307	PNN	Pinin	6	5.39484	5.38811	5.77784	5.44902	5.61328	5.43626	5.75148	5.82629	5.61211	5.33763	5.56763	5.2944	5.57316	5.60318	5.57155	5.53237	5.47377	5.79708
P23919	DTYMK	Thymidylate kinase	6	5.87123	5.58101	5.44662	5.66489	5.2509	5.66989	5.53276	5.41263	5.82872	5.48333	5.26534	5.63067	5.9288	5.85141	5.33579	5.5438	5.27523	5.42701
Q5VTR2	RNF20	E3 ubiquitin-protein ligase BRE1A	6	5.61043	5.55367	5.26277	5.59056	5.42295	5.59332	5.37347	5.62746	5.21368	5.45593	5.70641	5.79811	5.74657	5.75994	5.52536	5.52542	5.44189	5.79205
Q6ZNB6	NFXL1	NF-X1-type zinc finger protein NFXL1	6	5.42712	5.94914	5.27794	5.43648	5.64733	5.48386	5.20522	5.63311	5.67792	5.72328	5.66742	5.4803	5.77482	5.27488	5.3748	5.96098	5.39806	5.60733
Q9P2I0	CPSF2	Cleavage and polyadenylation specificity factor subunit 2	6	5.17133	5.75476	5.72869	5.51907	5.65171	5.62514	5.49167	5.4803	6.02206	5.40574	5.47013	5.59405	5.58001	5.52614	5.37245	5.83474	5.24558	5.52643
Q15392	DHCR24	Delta(24)-sterol reductase	6	5.38187	5.49718	5.46709	5.52886	5.10818	5.55367	5.3073	5.75071	5.44918	5.6353	5.81632	5.48542	5.62482	5.47984	5.6671	5.69485	5.52859	6.02373
O95602	POLR1A	DNA-directed RNA polymerase I subunit RPA1	6	5.67158	5.3573	5.97451	5.63315	5.78109	5.58451	5.85703	5.20835	5.27163	5.49115	6.09366	5.93953	5.01174	5.19078	5.39486	5.10494	5.86879	5.56538
Q15942	ZYX	Zyxin	6	5.58973	5.16488	5.86774	5.76021	5.65942	5.7248	5.51462	4.76399	5.7494	5.8102	5.80795	5.73607	5.75079	5.57677	5.56677	5.50745	5.17039	5.27884
O14929	HAT1	Histone acetyltransferase type B catalytic subunit	6	5.3773	5.24425	5.84694	5.77393	5.66095	5.06402	5.18758	5.50014	6.05321	5.73118	5.79923	5.59406	5.67469	5.3206	5.96277	5.38745	5.24828	5.57341
Q96EB6	SIRT1	NAD-dependent protein deacetylase sirtuin-1	6	5.76804	5.26714	5.50757	5.60553	5.18315	5.92401	5.74412	5.68876	5.3386	5.51217	5.50467	5.46499	5.4656	5.48256	5.7049	5.51997	5.5809	5.73732
Q92540-4	SMG7	Isoform 4 of Protein SMG7	6	5.62469	5.40423	5.3099	5.8871	5.5151	5.47953	5.21641	5.9276	5.25181	5.70307	5.52373	5.34701	5.40712	6.27521	5.35643	5.54831	5.56094	5.6618
O60341	KDM1A	Lysine-specific histone demethylase 1A	6	5.92611	5.74325	5.50738	5.47683	5.35044	5.54631	5.44744	5.85554	5.33151	5.47097	5.65996	5.40972	5.65375	5.77385	5.48082	5.75297	5.30571	5.30746
Q15365	PCBP1	Poly(rC)-binding protein 1	6	6.35212	5.53449	5.57958	6.23313	5.52234	5.4963	5.39982	6.15056	5.86738	5.40359	5.52836	5.22415	5.34575	5.20593	4.834	5.23791	5.81961	5.26499
O43684	BUB3	Mitotic checkpoint protein BUB3	6	5.45915	5.59295	5.72129	5.63843	5.91369	5.12911	5.54191	5.01566	5.84826	5.49351	5.57444	5.54636	5.72128	5.25514	5.7733	5.93104	5.59247	5.25202
P46060	RANGAP1	Ran GTPase-activating protein 1	6	5.46983	5.46268	5.95079	5.7266	5.95566	5.38268	5.58017	5.56141	5.59539	5.48989	5.88224	5.32297	5.44175	5.50301	5.58175	5.27865	5.31692	5.4976
P29692-2	EEF1D	Isoform 2 of Elongation factor 1-delta	6	5.53782	5.28058	5.43728	5.70939	5.6462	5.78601	5.54167	5.18543	5.72949	5.57414	5.69241	5.57207	5.50467	5.32604	5.52514	5.63612	5.73977	5.57576
Q5H9R7-5	PPP6R3	Isoform 5 of Serine/threonine-protein phosphatase 6 regulatory subunit 3	6	5.50917	5.84298	5.4675	5.69389	5.1948	5.924	5.5181	5.72457	5.35752	5.61676	5.56749	5.43026	5.39289	5.70381	5.3468	5.51838	5.55066	5.64039
P11177	PDHB	Pyruvate dehydrogenase E1 component subunit beta, mitochondrial	6	4.87744	5.83711	5.46292	5.46038	5.6055	5.83198	5.70305	5.09124	5.42531	5.65745	5.79246	6.07966	5.59441	5.85939	5.3167	5.81978	5.21481	5.37041
Q7KZ85	SUPT6H	Transcription elongation factor SPT6	6	5.46167	5.44671	5.69938	5.43064	5.42128	5.51511	5.56046	5.56648	5.74307	5.69936	5.47396	5.51692	5.48696	5.61084	5.45711	5.53878	5.81444	5.55683
Q9Y5B9	SUPT16H	FACT complex subunit SPT16	6	5.56009	5.47573	5.5274	5.54928	5.25072	5.55489	5.47438	5.50697	5.35615	5.32417	5.63903	5.49336	5.72934	5.57066	5.73559	5.47759	6.05252	5.72215
Q8NC51-3	SERBP1	Isoform 3 of Plasminogen activator inhibitor 1 RNA-binding protein	6	5.91202	5.96035	5.61341	5.10195	5.33583	5.62115	5.63362	5.5897	5.23452	5.76244	5.41922	5.49919	5.61798	5.64265	5.6072	5.34313	5.60856	5.49709
Q68E01	INTS3	Integrator complex subunit 3	6	5.60414	5.49663	5.51535	5.4961	5.51962	5.62354	5.51374	5.6025	5.69656	5.4631	5.47516	5.47347	5.69898	5.52845	5.52608	5.65475	5.59549	5.51634
Q8WYQ5	DGCR8	Microprocessor complex subunit DGCR8	6	5.63853	5.647	5.58542	5.72354	5.47908	5.45145	5.63616	5.66238	5.65538	5.56454	5.45405	5.45261	5.57217	5.4502	5.51102	5.38154	5.53619	5.59875
Q9NRN7	AASDHPPT	L-aminoadipate-semialdehyde dehydrogenase-phosphopantetheinyl transferase	6	5.54813	5.42152	5.30596	5.60009	5.5087	5.63973	5.7022	5.63127	5.51907	5.53112	5.40745	5.3963	5.59302	5.57234	5.65877	5.61761	5.70984	5.63689
O15228	GNPAT	Dihydroxyacetone phosphate acyltransferase	6	5.87994	5.41873	5.31692	5.79313	5.67869	6.03387	5.5876	5.50339	5.67565	5.26602	5.21896	5.54443	5.38038	5.47445	5.55733	5.7033	5.39885	5.56835
Q01780	EXOSC10	Exosome component 10	6	5.78081	5.17119	5.56609	5.79076	5.71356	6.01975	5.47705	5.55225	5.61336	5.81986	5.4355	5.57421	5.68413	5.86469	5.32921	5.67324	4.79036	5.14398
Q04760	GLO1	Lactoylglutathione lyase	6	6.01395	5.83549	5.71357	5.6566	5.81246	5.68326	5.66484	5.27743	5.5393	5.48512	6.01411	5.30234	5.57809	5.46236	5.3536	5.24522	5.07314	5.28912
O95202	LETM1	Mitochondrial proton/calcium exchanger protein	6	5.22494	5.9295	5.30951	5.63642	5.22614	5.82131	5.36596	6.04515	5.46825	5.58833	5.15813	5.43775	5.23622	6.27705	5.46664	5.69968	5.22856	5.88047
Q13867	BLMH	Bleomycin hydrolase	6	6.00741	5.32981	6.40937	6.15891	5.72341	5.35276	5.25157	4.65862	5.9498	5.54155	5.83095	5.66675	6.14592	5.39909	5.878	4.73845	5.12758	4.83005
P13667	PDIA4	Protein disulfide-isomerase A4	6	6.03872	5.50926	5.07689	5.52553	5.58623	5.49174	5.70999	5.46233	6.35314	5.03888	5.29419	5.48852	6.0006	5.40239	5.7768	5.27172	5.47375	5.49933
Q8NFA0	USP32	Ubiquitin carboxyl-terminal hydrolase 32	6	5.44451	5.30202	5.43233	5.75913	5.66996	5.31234	5.54807	5.59935	5.75366	5.43231	5.56146	5.784	5.51946	5.23602	5.64876	5.31596	5.56759	6.11307
Q9BV20	MRI1	Methylthioribose-1-phosphate isomerase	6	5.74178	5.51891	5.5657	5.52167	5.38354	5.66934	5.68793	5.30779	5.54221	5.6045	5.46286	5.57161	5.73427	5.53801	5.66137	5.57515	5.4576	5.45577
Q9NV06	DCAF13	DDB1- and CUL4-associated factor 13	6	4.98278	5.95769	5.25547	5.89928	5.48427	5.52372	5.39193	5.66727	5.42598	5.82247	5.38387	5.16944	5.62227	5.38556	5.67774	5.87367	5.80836	5.66824
Q99569	PKP4	Plakophilin-4	6	5.40983	5.86666	5.95848	5.43584	5.33886	5.39505	5.65404	5.42817	5.89381	5.61445	5.92118	5.67109	5.37998	5.18683	5.45257	5.24865	5.50832	5.6362
Q14444	CAPRIN1	Caprin-1	6	5.60112	5.28982	5.85363	5.58626	5.48416	5.29403	5.55627	5.31242	5.74624	5.52948	5.70434	5.57965	5.42396	5.30235	5.64477	5.51199	5.83711	5.74239
Q04656-3	ATP7A	Isoform 2 of Copper-transporting ATPase 1	6	5.54025	5.59089	5.54498	5.67064	5.54677	5.52485	5.54069	5.5849	5.17415	5.68503	5.41736	5.54566	5.61887	5.56514	5.35959	5.56045	5.49868	6.03109
O75844	ZMPSTE24	CAAX prenyl protease 1 homolog	6	5.76435	5.30915	5.47891	5.5286	5.50185	5.45458	5.50708	5.50964	5.57142	5.52466	6.10289	5.60261	5.83499	5.70454	5.6539	5.6939	5.19391	5.06303
P16083	NQO2	Ribosyldihydronicotinamide dehydrogenase [quinone]	6	5.79986	5.73917	5.75086	5.41247	5.65217	5.53306	5.31334	5.6379	5.63093	5.36823	5.46415	5.26284	5.66913	5.8156	5.50327	5.70208	5.24723	5.4977
Q8IX01	SUGP2	SURP and G-patch domain-containing protein 2	6	5.52384	5.65196	5.46938	5.95714	5.65222	5.72054	5.37435	5.83994	5.48345	5.38412	5.16133	5.62195	5.47924	5.61704	5.5197	5.64313	5.45577	5.4449
P40925-3	MDH1	Isoform 3 of Malate dehydrogenase, cytoplasmic	6	5.89895	5.59125	5.61222	5.50455	5.74259	5.54934	5.74842	5.55327	5.525	5.38834	5.43411	5.38269	5.67156	5.26756	5.7675	5.37811	5.53807	5.44648
O43747-2	AP1G1	Isoform 2 of AP-1 complex subunit gamma-1	6	5.84064	5.11141	5.42592	5.31696	5.2548	5.31543	5.47898	5.31075	5.85858	5.80432	5.58977	5.47391	5.96235	5.7497	5.91799	5.3627	5.49658	5.72919
Q14203	DCTN1	Dynactin subunit 1	6	5.16493	5.64957	5.1899	5.91802	5.50736	5.70502	5.54918	5.56166	5.84545	5.38025	5.23325	5.80693	5.22305	5.52396	5.59897	5.95473	5.81923	5.36853
P50213	IDH3A	Isocitrate dehydrogenase [NAD] subunit alpha, mitochondrial	6	5.60959	5.56477	5.57082	5.42584	5.67389	5.73689	5.51288	5.49927	5.42457	5.63347	5.44478	5.74539	5.51049	5.6682	5.48607	5.55804	5.4599	5.47515
P43246	MSH2	DNA mismatch repair protein Msh2	6	5.29346	5.62075	5.57901	5.69105	5.25284	5.61554	5.38447	5.64969	5.50718	5.63013	5.49385	5.81468	5.59	5.88185	5.4722	5.36896	5.3989	5.75542
Q13188-2	STK3	Isoform 2 of Serine/threonine-protein kinase 3	6	5.21626	6.37086	4.89709	6.23872	4.96738	6.28059	5.09538	6.18064	4.97604	5.93806	4.96352	5.85764	5.15215	6.10209	5.17549	5.95209	4.84398	5.79202
Q00839	HNRNPU	Heterogeneous nuclear ribonucleoprotein U	6	5.69169	5.29238	5.3884	5.30821	5.43345	5.36773	5.55155	5.61302	5.55802	5.40024	5.94924	5.59271	5.85993	5.65953	5.76106	5.28849	5.75548	5.52885
P09960	LTA4H	Leukotriene A-4 hydrolase	6	5.52809	6.16934	5.40804	5.62564	5.40291	6.02664	5.46754	5.72383	5.01799	5.53418	5.17585	5.55573	5.60446	5.8456	5.41564	5.83904	5.15593	5.50354
Q14103	HNRNPD	Heterogeneous nuclear ribonucleoprotein D0	6	5.66101	5.41396	5.3543	5.39849	5.35677	5.57587	5.50755	5.39484	5.47097	5.82205	5.57558	5.81141	5.58134	5.50475	5.41598	5.49979	5.68401	5.97133
Q9Y4E1	WASHC2C	WASH complex subunit 2C	6	5.7324	5.58323	5.54196	5.32187	5.41976	5.6252	5.4995	5.47388	5.71805	5.35258	5.65228	5.61802	5.6669	5.15684	5.44809	5.82503	5.51295	5.85147
Q9HCN4-5	GPN1	Isoform 5 of GPN-loop GTPase 1	6	5.58349	5.49142	5.32954	5.29345	5.65011	5.5613	5.55481	5.67847	5.51648	5.6984	5.82219	5.47617	5.59241	5.39235	5.67203	5.49634	5.58712	5.60392
Q96BR5	COA7	Cytochrome c oxidase assembly factor 7	6	5.65183	6.02715	5.9464	5.66369	5.42327	5.67773	5.62894	5.32394	5.58555	5.65701	4.98574	5.48951	5.34265	5.4569	5.42325	5.49728	5.72254	5.49662
Q9Y285	FARSA	Phenylalanine--tRNA ligase alpha subunit	6	5.55484	5.54941	5.61221	5.59024	5.55527	5.35918	5.47122	5.44975	5.61727	5.47169	5.74353	5.65603	5.55694	5.39321	5.40692	5.5867	5.76898	5.65662
O75592	MYCBP2	E3 ubiquitin-protein ligase MYCBP2	6	5.50342	5.57897	5.4448	5.47772	5.48179	5.75436	5.4342	5.68606	5.38401	5.63601	5.44572	5.52284	5.46287	5.67777	5.81568	5.35185	5.74363	5.59831
Q13217	DNAJC3	DnaJ homolog subfamily C member 3	6	5.4939	5.30875	5.471	5.57299	5.33342	5.46755	5.58459	5.37975	5.56323	5.58523	5.69682	5.83199	5.45531	5.49206	5.5224	5.55311	5.96356	5.72435
P19838-2	NFKB1	Isoform 2 of Nuclear factor NF-kappa-B p105 subunit	6	5.51559	6.13489	5.15379	5.35313	5.68925	5.52776	5.61083	5.5839	5.30931	5.86093	5.71499	5.17597	5.42068	5.56583	5.48384	5.72714	5.55761	5.61456
Q5T7W0-2	ZNF618	Isoform 2 of Zinc finger protein 618	6	5.66467	5.78555	5.65676	5.67619	5.43629	5.40717	5.53583	5.83807	5.40256	5.48099	5.65567	5.52502	5.54899	5.55686	5.41365	5.53392	5.5426	5.3392
Q9UP83-2	COG5	Isoform 2 of Conserved oligomeric Golgi complex subunit 5	6	5.35908	5.32262	5.66704	5.43713	5.43726	5.55907	5.55386	5.51438	5.44389	5.60011	5.81132	5.38064	5.72255	5.60743	5.54375	5.5847	5.57715	5.87802
Q9BQ52	ELAC2	Zinc phosphodiesterase ELAC protein 2	6	5.689	5.34693	5.39399	5.79291	5.85362	5.57032	5.22437	5.29528	5.7434	5.44789	5.8329	5.65408	5.58895	5.43869	5.4001	5.81767	5.54116	5.36875
Q9Y305-4	ACOT9	Isoform 4 of Acyl-coenzyme A thioesterase 9, mitochondrial	6	5.55783	5.6024	5.53304	5.70068	5.60312	5.49114	5.55982	5.62845	5.35555	5.57102	5.47237	5.432	5.45944	5.69177	5.66423	5.47683	5.40322	5.79709
Q86U70	LDB1	LIM domain-binding protein 1	6	6.21532	6.17983	5.84931	5.92808	6.09553	5.59102	5.49515	4.29007	6.12006	5.37439	5.77579	5.6361	6.18137	5.35727	6.02015	5.035	4.6468	4.20877
Q8TCU4	ALMS1	Alstrom syndrome protein 1	6	5.24182	5.30571	5.47955	5.82824	5.26591	5.65722	5.43106	5.58996	5.39354	5.63758	5.62381	5.68576	5.2591	5.60605	5.57437	5.97134	5.65311	5.79587
Q5TA02	GSTO1	Glutathione-dependent dehydroascorbate reductase (Fragment)	6	5.51044	5.55762	5.55628	5.71062	5.49762	5.36445	5.50536	5.54559	5.59271	5.57257	5.49026	5.44904	5.40008	5.65138	5.82181	5.54484	5.58645	5.64289
P12829	MYL4	Myosin light chain 4	6	5.42339	5.16272	5.67627	5.76071	5.5935	5.77155	5.59437	5.40667	5.52385	5.66182	5.70654	5.52211	5.66395	5.5137	5.66771	5.79224	5.32228	5.23663
Q9NTZ6	RBM12	RNA-binding protein 12	6	5.54647	5.58094	5.48775	5.47668	5.3441	5.51247	5.75039	5.35755	5.6519	5.42793	5.75004	5.5675	5.72434	5.5227	5.54964	5.43463	5.64959	5.66538
Q9BXW9-1	FANCD2	Isoform 1 of Fanconi anemia group D2 protein	6	5.17219	5.80577	5.75739	5.53715	5.26696	5.5248	5.324	5.36626	5.54597	5.97121	5.27317	5.90649	5.31841	5.66575	5.47675	5.60395	5.35898	6.1248
Q9NYH9	UTP6	U3 small nucleolar RNA-associated protein 6 homolog	6	5.7577	5.1871	5.66164	5.91642	5.5387	5.77509	5.37998	5.61991	5.7149	5.58306	5.43734	5.58805	5.57097	5.49751	5.2441	5.57499	5.52573	5.4268
O00400	SLC33A1	Acetyl-coenzyme A transporter 1	6	5.66384	5.51687	5.86158	5.56475	5.63277	5.40839	5.79575	5.5511	5.76757	5.60858	5.64282	5.20183	5.59125	5.28052	5.48027	5.10861	5.78049	5.54302
Q9Y5S9	RBM8A	RNA-binding protein 8A	6	5.19731	5.70228	5.30375	5.8022	5.3109	5.94248	5.5028	5.75538	5.51939	5.4694	5.45592	5.80571	5.32372	5.71712	5.47502	5.63781	5.24773	5.83109
Q9Y5S1	TRPV2	Transient receptor potential cation channel subfamily V member 2	6	5.70026	5.79032	5.36079	5.50131	5.43344	5.58901	5.48423	5.5591	5.42376	5.39868	5.90889	5.68842	5.43037	5.36158	5.43669	5.60754	5.67321	5.6524
A0MZ66-3	SHTN1	Isoform 3 of Shootin-1	6	5.68479	5.72196	5.60332	5.64676	5.64999	5.4594	5.3234	5.74835	5.71012	5.42919	5.36618	5.423	5.29138	5.56565	5.51334	5.51831	5.53523	5.80961
Q5JRX3-2	PITRM1	Isoform 2 of Presequence protease, mitochondrial	6	5.65407	5.66909	5.51388	5.27852	5.95362	5.49732	5.54395	5.33284	5.8306	5.22213	5.74161	5.54174	5.81272	5.29396	5.3372	5.8165	5.72607	5.23419
Q9NRY4	ARHGAP35	Rho GTPase-activating protein 35	6	5.58522	5.89382	5.5919	5.54324	5.51792	5.27053	5.65336	5.46455	6.1372	5.46674	5.38894	5.25662	5.63656	5.40726	5.56253	5.3947	5.76173	5.46716
P82675	MRPS5	28S ribosomal protein S5, mitochondrial	6	4.97162	5.78165	5.51081	5.47303	5.48617	5.28688	5.33843	5.53394	5.32525	5.50163	5.66157	5.97325	5.54314	6.36675	5.6119	5.63692	5.17451	5.82255
Q9Y3D8	AK6	Adenylate kinase isoenzyme 6	6	5.43828	5.7836	5.66213	5.69805	5.47811	5.78624	5.84116	5.41137	5.32199	5.70009	5.61198	5.53725	5.47114	5.71128	5.565	5.64164	5.17575	5.16494
P85037	FOXK1	Forkhead box protein K1	6	5.38397	5.27729	5.80859	5.60245	5.53152	5.36436	5.5634	5.49534	5.55962	5.50969	5.54749	5.59584	5.50895	5.47216	5.7388	5.57479	5.78678	5.67895
Q14258	TRIM25	E3 ubiquitin/ISG15 ligase TRIM25	6	5.55112	5.21553	5.5355	5.36924	5.63171	5.26801	5.80682	5.52072	5.71875	5.40319	5.77213	5.43929	5.87284	5.39511	5.73992	5.39218	5.91662	5.45132
Q9Y3F4-2	STRAP	Isoform 2 of Serine-threonine kinase receptor-associated protein	6	5.29977	5.86719	5.30503	5.41618	5.9261	5.75631	5.60508	5.61767	5.46902	5.73321	5.45378	5.74883	5.66379	6.0016	5.39222	5.55121	5.03426	5.15873
P42224	STAT1	Signal transducer and activator of transcription 1-alpha/beta	6	5.52732	5.64759	5.67735	5.62009	5.29579	5.0679	5.60972	5.77171	5.38435	5.48943	5.67141	5.6625	5.28562	5.58204	5.7578	5.52581	5.809	5.61458
P82094-2	TMF1	Isoform 2 of TATA element modulatory factor	6	5.6797	5.46855	5.36792	5.54896	5.79321	5.1839	5.64639	5.61331	5.84087	5.25158	5.56647	5.44323	5.82374	5.47151	5.72319	5.62435	5.51712	5.43601
Q9NS91	RAD18	E3 ubiquitin-protein ligase RAD18	6	5.71706	5.40804	5.74503	5.45762	5.68487	5.38624	5.57553	5.51189	5.63508	5.41414	5.71758	5.51411	5.48447	5.09505	5.45649	5.69145	5.60142	5.90391
O75146	HIP1R	Huntingtin-interacting protein 1-related protein	6	5.52015	5.66793	5.6196	5.46585	5.29204	5.39412	5.46013	5.55259	5.7087	5.62303	5.64561	5.71921	5.63942	5.40147	5.54544	5.35641	5.69889	5.6894
Q9Y2L1	DIS3	Exosome complex exonuclease RRP44	6	5.64311	5.69889	5.525	5.85982	5.91264	5.46103	5.56154	5.58801	5.63943	5.43075	5.38986	5.33784	5.58883	5.48525	5.74197	5.46759	5.22894	5.43951
Q14202-2	ZMYM3	Isoform 2 of Zinc finger MYM-type protein 3	6	5.60936	5.70809	5.17871	6.14592	5.53631	5.24776	5.31893	5.74843	5.15921	5.35729	5.59514	5.78448	5.31663	5.74563	5.25698	5.71229	5.64524	5.93363
Q460N5	PARP14	Protein mono-ADP-ribosyltransferase PARP14	6	5.84833	5.47165	5.67171	5.40763	5.48218	5.68621	5.30904	5.69166	5.32901	5.57023	5.49823	5.54886	5.42308	5.79981	5.64125	5.56528	5.52453	5.5313
Q76FK4-4	NOL8	Isoform 4 of Nucleolar protein 8	6	5.76888	5.77253	5.51897	5.36273	5.40145	5.55504	5.55213	5.49946	5.62106	5.61293	5.75173	5.53868	5.37462	5.45641	5.52743	5.39602	5.52819	5.76174
Q96JI7	SPG11	Spatacsin	6	5.57613	5.35976	5.21503	5.53753	5.55034	5.39819	5.30958	5.31295	5.46617	5.56884	5.69043	5.87623	5.86235	5.58814	5.64181	5.59687	5.67164	5.77798
O43791	SPOP	Speckle-type POZ protein	6	5.33911	5.4022	5.85148	5.55349	5.54751	5.26678	5.69534	5.27437	5.80529	5.62995	5.70649	5.58168	5.62013	5.46992	5.50445	5.21632	5.89216	5.64334
Q96JJ7	TMX3	Protein disulfide-isomerase TMX3	6	5.4244	5.64503	5.38516	5.59489	5.35776	5.65104	5.46203	5.68355	5.45567	5.51373	5.42637	5.55161	5.50122	5.72611	5.62161	5.74899	5.53071	5.72014
P62316-2	SNRPD2	Isoform 2 of Small nuclear ribonucleoprotein Sm D2	6	5.98034	5.41384	5.61374	5.88701	5.59424	5.72268	5.50771	5.83	5.78443	5.34334	4.96269	4.87762	5.35465	5.44859	5.6568	5.50398	5.53874	5.9796
Q9UBQ5	EIF3K	Eukaryotic translation initiation factor 3 subunit K	6	5.30437	5.77476	5.64706	5.74634	5.07303	5.77896	5.31252	5.5832	5.28392	5.66816	5.58583	6.01268	5.34202	5.7125	5.18567	5.728	5.41764	5.84334
P50579	METAP2	Methionine aminopeptidase 2	6	5.39539	5.44221	5.73554	5.80823	5.30748	5.3156	5.72921	5.16394	5.97984	5.73655	5.53519	5.6141	5.4743	5.6989	5.78133	5.50342	5.60404	5.17472
Q9BUL8	PDCD10	Programmed cell death protein 10	6	5.77569	5.79769	5.38665	5.52219	5.6693	5.63847	5.46509	5.55095	5.58834	5.53239	5.47245	5.75369	5.38086	5.39383	5.32678	5.48578	5.74671	5.51315
P16435	POR	NADPH--cytochrome P450 reductase	6	5.49246	5.27973	5.71559	5.38104	5.42508	5.46936	5.56121	5.46979	5.76047	5.54658	5.75811	5.59556	5.49929	5.32965	5.68855	5.44064	5.87031	5.71659
Q13610	PWP1	Periodic tryptophan protein 1 homolog	6	5.87591	5.50925	5.40992	5.70086	5.63244	5.49111	5.76639	5.5914	5.22359	5.71884	5.66914	5.28685	5.51391	5.5267	5.68901	5.38877	5.65737	5.34852
O15294	OGT	UDP-N-acetylglucosamine--peptide N-acetylglucosaminyltransferase 110 kDa subunit	6	5.35855	5.486	6.00414	5.76486	5.67568	5.29699	5.77336	5.44912	5.82726	5.38355	5.66123	5.52275	5.43964	5.55977	5.32259	5.2477	5.54949	5.67733
Q03426	MVK	Mevalonate kinase	6	5.65523	5.73461	5.43105	5.55814	5.73543	6.13735	5.52163	5.50322	5.4565	5.58579	5.23157	5.52208	5.66403	5.53302	5.22684	5.59773	5.53583	5.36996
Q01433	AMPD2	AMP deaminase 2	6	5.5111	5.50249	5.44809	5.85359	5.61649	5.48584	5.48572	5.70055	5.39822	5.64085	5.48636	5.77171	5.52216	5.47016	5.42257	5.61679	5.47327	5.59404
P54619-3	PRKAG1	Isoform 3 of 5'-AMP-activated protein kinase subunit gamma-1	6	5.55751	5.48249	5.56163	5.74607	5.43024	5.6655	5.35408	5.74559	5.47599	5.55821	5.19745	5.4967	5.6036	5.40375	5.54564	5.58662	5.89223	5.6967
Q99729	HNRNPAB	Heterogeneous nuclear ribonucleoprotein A/B	6	5.62055	5.41764	5.40991	5.66077	5.4141	5.64373	5.60261	5.3791	5.7543	5.68572	5.57052	5.71226	5.5824	5.46751	5.53912	5.54063	5.51028	5.48885
Q92979	EMG1	Ribosomal RNA small subunit methyltransferase NEP1	6	5.51193	5.98455	5.30184	5.94627	5.54905	5.85322	5.20959	5.64561	5.36819	6.01919	5.18803	5.5779	5.51121	5.73743	5.40264	5.67816	5.0354	5.47979
Q08945	SSRP1	FACT complex subunit SSRP1	6	5.85059	5.45736	5.65771	5.63463	5.69228	5.90385	5.85697	5.51752	5.62583	5.49163	5.66902	5.21533	5.45196	5.25968	5.74387	5.27482	5.49897	5.19799
O75436	VPS26A	Vacuolar protein sorting-associated protein 26A	6	6.13506	5.5087	5.42947	5.11982	5.56363	5.79153	5.48524	5.50031	5.92353	5.74862	5.24777	5.30054	5.45972	5.47679	5.87971	5.35268	5.78999	5.28687
Q15005	SPCS2	Signal peptidase complex subunit 2	6	5.42136	5.62541	5.30701	5.65324	5.69999	5.49218	4.99141	5.68912	5.59462	5.30298	5.48027	5.78964	5.61245	5.58835	5.61742	5.28687	6.09486	5.75285
P30085	CMPK1	UMP-CMP kinase	6	5.22621	5.58453	5.59318	5.5805	5.60829	5.81332	5.74058	5.38131	5.25196	5.36885	5.70014	5.4741	5.41738	5.59679	5.55493	5.91569	5.44465	5.74759
Q8TDN6	BRIX1	Ribosome biogenesis protein BRX1 homolog	6	5.67899	5.60422	5.52258	5.48015	5.88768	5.54824	5.53868	5.68828	5.57627	5.53675	5.65678	5.34352	5.68212	5.3466	5.6688	5.61875	5.38852	5.23306
P21283	ATP6V1C1	V-type proton ATPase subunit C 1	6	5.64966	5.57699	5.50686	5.63293	5.65165	5.55388	5.56865	5.84049	5.51356	5.5852	5.58521	5.31929	5.55146	5.42666	5.71302	5.42211	5.59418	5.30819
O43396	TXNL1	Thioredoxin-like protein 1	6	5.75932	5.94556	5.49658	5.52314	5.71421	5.616	5.75137	5.69168	5.4168	5.51675	5.37687	5.5771	5.58534	5.39422	5.44858	5.59967	5.04897	5.53785
Q13206	DDX10	Probable ATP-dependent RNA helicase DDX10	6	5.30752	5.49591	5.41304	5.73456	5.27734	5.62042	5.44002	5.78972	5.53832	5.68718	5.56451	5.49034	5.50803	5.66534	5.62651	5.59938	5.55053	5.69134
P30044	PRDX5	Peroxiredoxin-5, mitochondrial	6	5.05001	5.49367	5.53405	4.88188	5.53747	5.33126	5.825	5.34374	6.84554	5.37689	5.82001	5.83597	6.11448	5.3925	5.34197	5.19773	5.54843	5.5294
Q14738	PPP2R5D	Serine/threonine-protein phosphatase 2A 56 kDa regulatory subunit delta isoform	6	5.6282	5.43811	5.54006	5.5915	5.78959	5.47042	5.54249	5.73315	5.61542	5.57167	5.53484	5.14149	5.85348	5.47745	5.89579	5.41455	5.40468	5.35712
Q53GQ0	HSD17B12	Very-long-chain 3-oxoacyl-CoA reductase	6	5.38406	5.51853	5.62348	5.63325	5.5589	5.53559	5.43513	5.81717	5.86514	5.58876	5.48369	5.40002	5.46982	5.45756	5.3629	5.78025	5.65371	5.43205
O15084-1	ANKRD28	Isoform 3 of Serine/threonine-protein phosphatase 6 regulatory ankyrin repeat subunit A	6	5.66776	5.23377	5.49203	5.81128	5.87134	5.61236	5.49121	5.52096	5.65732	5.4713	5.54005	5.35011	5.64248	5.17603	5.88237	5.34344	5.66331	5.57288
O95163	ELP1	Elongator complex protein 1	6	5.59279	5.37402	5.57227	5.46835	5.71237	5.62414	5.65944	5.45342	5.7322	5.49493	5.5555	5.38472	5.49316	5.37886	5.7372	5.47421	5.70051	5.59189
Q9UKK9	NUDT5	ADP-sugar pyrophosphatase	6	5.33025	5.68515	5.72358	5.77009	5.68294	5.7525	5.36661	5.4095	5.37518	5.69248	5.83705	5.46214	5.49485	5.4757	5.7213	5.59229	5.38517	5.24322
P43490	NAMPT	Nicotinamide phosphoribosyltransferase	6	5.53389	6.01955	5.06306	5.76621	5.12622	6.14424	5.27478	6.05903	5.01894	5.7316	4.8618	5.83201	5.55444	6.12084	5.17955	5.94607	5.01353	5.75425
P14678-3	SNRPB	Isoform SM-B1 of Small nuclear ribonucleoprotein-associated proteins B and B'	6	5.96554	5.45836	5.52496	5.75819	5.51214	5.66868	5.60848	5.7158	5.88852	5.09829	5.28448	5.31496	5.51097	5.03583	5.85475	5.32208	5.7421	5.7359
Q14157-5	UBAP2L	Isoform 5 of Ubiquitin-associated protein 2-like	6	5.41867	5.44933	5.90124	5.644	5.56678	5.55993	5.79199	5.13683	5.65912	5.44319	5.93807	5.37633	5.66788	5.40345	5.67526	5.45207	5.40691	5.50892
Q9H2P0	ADNP	Activity-dependent neuroprotector homeobox protein	6	5.60425	5.06542	5.60237	5.62572	5.99793	5.8178	5.50378	5.22893	5.76107	5.47313	5.3215	5.5372	5.59544	5.48302	5.56826	5.59047	5.62431	5.59941
Q96J01	THOC3	THO complex subunit 3	6	5.0701	5.43907	5.687	5.44067	5.95832	5.17829	6.03416	4.95654	5.3962	6.06033	5.70447	6.12996	5.96864	5.86971	5.38188	5.38352	5.16492	5.17624
O60568	PLOD3	Multifunctional procollagen lysine hydroxylase and glycosyltransferase LH3	6	5.68453	5.19445	5.92502	5.36554	5.63291	5.75584	5.62004	5.50576	5.87558	5.38613	5.50874	5.29528	5.50741	5.35561	5.6694	5.29141	5.78658	5.63977
Q9Y4W6	AFG3L2	AFG3-like protein 2	6	5.4636	5.45282	5.51596	5.39453	5.58122	5.43733	5.75497	5.73742	5.38584	5.62054	5.46584	5.33179	5.49289	5.97275	5.77938	5.55031	5.66077	5.40204
Q96KB5	PBK	Lymphokine-activated killer T-cell-originated protein kinase	6	5.70309	5.47917	5.19351	5.42068	5.48281	5.48246	5.56098	5.72826	5.24493	5.48102	5.64605	5.47747	5.75151	5.92861	5.48579	5.45602	5.69804	5.77961
P51610-4	HCFC1	Isoform 4 of Host cell factor 1	6	5.69554	5.57739	5.72154	5.35199	5.6165	5.6668	5.27434	5.69794	5.23547	5.6076	5.64425	5.26445	5.7222	5.47025	5.47784	5.36536	5.59422	6.01631
P11766	ADH5	Alcohol dehydrogenase class-3	6	5.59987	5.05469	5.89118	5.52818	5.32264	5.21937	5.80052	5.14614	5.70437	5.24467	5.99941	5.45125	5.71715	5.21608	5.9387	5.44475	6.05709	5.66394
P53634	CTSC	Dipeptidyl peptidase 1	6	4.57664	5.74659	5.82864	5.21106	5.90076	4.97687	6.61303	4.07316	5.34114	5.90671	6.37611	6.62686	6.30574	6.33282	5.66181	5.62794	4.32742	4.56672
Q12905	ILF2	Interleukin enhancer-binding factor 2	6	5.86274	4.88008	5.75284	5.51809	5.73821	5.6313	5.74633	5.4158	5.82037	5.23253	5.22435	5.47095	5.83751	5.55272	5.46564	5.54214	5.59544	5.71295
Q7Z4W1	DCXR	L-xylulose reductase	6	5.75125	5.40074	5.54941	5.92569	5.70041	5.87432	5.50326	5.60525	5.64712	5.5945	5.45735	5.3482	5.55337	5.47871	5.40316	5.72275	5.29504	5.18947
Q9NZ08-2	ERAP1	Isoform 2 of Endoplasmic reticulum aminopeptidase 1	6	5.52824	5.72138	5.61016	5.34146	5.54598	5.78688	5.447	5.58039	5.56519	5.4207	5.4572	5.81534	5.86413	5.43419	5.80739	5.35513	5.24793	5.47131
O75955	FLOT1	Flotillin-1	6	5.67376	5.52939	5.6812	5.798	5.41921	5.67836	5.6048	5.5503	5.49226	5.65037	5.26032	5.51812	5.3364	5.6523	5.36848	5.54509	5.71462	5.52701
O60841	EIF5B	Eukaryotic translation initiation factor 5B	6	5.7363	5.94191	5.5556	5.57033	5.90368	5.79938	5.44108	5.32573	5.53694	6.11007	5.53171	5.42467	4.89742	5.20754	5.41381	5.18469	5.60949	5.80964
Q1MSJ5	CSPP1	Centrosome and spindle pole-associated protein 1	6	6.0902	5.87072	5.43618	5.69463	5.31345	5.69629	5.58448	5.29533	5.5779	5.31281	5.6309	5.41681	5.44984	5.64477	5.58691	5.36749	5.4743	5.557
Q13868	EXOSC2	Exosome complex component RRP4	6	5.48821	5.50601	5.78403	5.66651	5.71291	5.37844	5.65245	5.58599	5.42155	5.77068	5.47593	5.64782	5.43663	5.58476	5.38711	5.45594	5.65839	5.38664
Q13418	ILK	Integrin-linked protein kinase	6	5.37256	5.48852	5.48073	5.50366	5.59299	5.63135	5.4838	5.54607	5.56229	5.53498	5.42783	5.61171	5.40946	5.97715	5.76271	5.64405	5.23154	5.73859
P46777	RPL5	60S ribosomal protein L5	6	5.66772	5.66694	5.3917	5.66326	5.88242	5.55482	5.46783	5.37616	5.42321	5.46544	5.59395	5.90773	5.35542	5.68486	5.62001	5.3057	5.40262	5.57023
P00352	ALDH1A1	Retinal dehydrogenase 1	6	5.58507	5.30408	5.68442	5.55046	5.44395	5.65581	5.74067	5.24094	5.89464	5.43096	5.78078	5.57077	5.49501	5.44378	5.65636	5.19004	5.78171	5.55055
Q7Z6E9	RBBP6	E3 ubiquitin-protein ligase RBBP6	6	5.96114	6.17189	5.81879	5.39188	5.55331	5.82556	5.36361	5.58901	5.42891	6.0519	5.34623	5.18633	5.17804	5.43264	5.31233	5.55503	5.37812	5.45529
P35659	DEK	Protein DEK	6	5.35421	5.19604	5.81736	5.59559	5.2634	5.18373	5.3054	5.23011	5.45465	5.70655	5.89258	5.86272	5.5705	5.4059	5.57079	5.31585	6.33589	5.93876
Q96SU4-6	OSBPL9	Isoform 6 of Oxysterol-binding protein-related protein 9	6	5.61058	5.59253	5.56328	5.40054	5.70766	5.75678	5.2522	5.54178	5.37623	5.58022	5.47241	5.49537	5.43398	5.7125	5.74514	5.6206	5.6246	5.51359
Q8WUI4-8	HDAC7	Isoform 8 of Histone deacetylase 7	6	5.78009	5.46807	5.45694	5.65864	5.70995	5.24746	5.63468	5.86871	5.78161	5.55005	5.57331	5.24726	5.38606	5.23216	5.56903	5.36186	5.85607	5.61805
O43933	PEX1	Peroxisome biogenesis factor 1	6	5.83049	5.67754	5.32992	5.66124	5.45014	5.60759	5.67629	5.43852	5.57301	5.48746	5.42758	5.61685	5.36309	5.41205	5.70046	5.77148	5.35186	5.62443
Q7Z3B4	NUP54	Nucleoporin p54	6	5.53838	5.66599	5.5858	5.39068	5.37719	5.36756	5.44322	5.65117	5.89848	5.46873	5.81617	5.4994	5.50843	5.33125	5.44927	5.34103	6.04191	5.62532
O43615	TIMM44	Mitochondrial import inner membrane translocase subunit TIM44	6	5.55392	5.43956	5.56854	5.36405	5.61592	5.61564	5.50252	5.72776	5.55322	5.488	5.54854	5.51648	5.65328	5.58427	5.53205	5.59622	5.54722	5.59279
Q86Y56	DNAAF5	Dynein assembly factor 5, axonemal	6	5.75827	5.66152	5.16885	5.61061	5.42637	5.64814	5.37013	5.64371	5.60249	5.39012	5.22762	5.68675	5.66739	5.33478	5.74744	5.74157	5.61503	5.6992
Q9H9B4	SFXN1	Sideroflexin-1	6	5.39493	5.63639	5.44704	5.48411	5.47604	5.8679	5.34438	5.65473	5.39969	5.66187	5.32343	5.48757	5.58819	5.91387	5.65671	5.87744	5.18582	5.5999
Q8NDI1	EHBP1	EH domain-binding protein 1	6	5.87913	5.28153	5.6034	5.51959	5.44718	5.56338	5.78338	5.32073	5.78133	5.68275	5.61403	5.36676	5.42266	5.42153	5.39659	5.45174	5.88682	5.57747
Q6P1J9	CDC73	Parafibromin	6	5.30964	5.52866	5.7389	5.93194	5.78554	5.80403	5.46862	5.98312	5.3952	5.51846	5.42278	5.49369	5.66132	5.43777	5.41062	5.46857	5.11501	5.52612
P63241-2	EIF5A	Isoform 2 of Eukaryotic translation initiation factor 5A-1	6	5.29038	5.93814	5.31492	5.86369	5.69538	5.7603	5.43839	5.32139	5.12344	5.82478	5.31956	5.7582	5.74364	6.54821	5.4455	6.11943	4.57619	4.91846
P62495-2	ETF1	Isoform 2 of Eukaryotic peptide chain release factor subunit 1	6	5.75416	5.5511	5.26932	5.80515	5.43317	5.51129	5.69942	5.5866	5.50677	5.37294	5.55533	5.69518	5.56508	5.2328	5.54013	5.48556	5.74442	5.69158
O75569	PRKRA	Interferon-inducible double-stranded RNA-dependent protein kinase activator A	6	5.21882	5.37653	5.51397	5.59002	5.55695	5.533	5.52393	5.66249	5.59839	5.61021	5.63898	5.54267	5.64015	5.50067	5.66622	5.70081	5.36437	5.76181
Q9UN86	G3BP2	Ras GTPase-activating protein-binding protein 2	6	5.87145	5.99822	5.13534	5.49266	6.15673	5.72132	5.18814	5.42936	5.38587	5.83634	5.54094	5.84336	5.35366	5.59598	5.20777	5.42209	5.36359	5.45719
P13807	GYS1	Glycogen [starch] synthase, muscle	5	5.11506	5.2534	5.49423	5.05904	5.62549	5.65541	6.02759	5.65475	5.89323	5.27577	5.65943	5.43456	5.79386	5.11875	5.77236	5.40933	5.92405	5.8337
Q14498	RBM39	RNA-binding protein 39	5	5.70109	5.77078	5.64967	5.77868	5.33248	5.57823	5.7722	5.54497	5.10207	5.28358	5.27811	5.40012	5.27278	5.74599	5.35551	5.868	5.57454	5.9912
P08559-4	PDHA1	Isoform 4 of Pyruvate dehydrogenase E1 component subunit alpha, somatic form, mitochondrial	5	5.55294	5.2156	6.06047	5.53202	5.75527	5.43398	5.97409	5.32556	5.65801	5.47156	5.51898	4.94012	5.62659	5.47286	5.60596	5.33416	5.78709	5.73476
P09327	VIL1	Villin-1	5	5.43371	5.50819	5.48384	5.75776	5.45436	5.57967	5.62866	5.75839	5.6652	5.37517	5.61021	5.69388	5.25166	5.49539	5.3471	5.72472	5.63378	5.59831
Q9UNF0	PACSIN2	Protein kinase C and casein kinase substrate in neurons protein 2	5	5.42747	5.32458	5.54087	5.40093	5.67722	5.73595	5.4277	5.37055	5.51493	5.54124	5.62922	5.43808	5.7405	5.85456	5.6029	5.44807	5.7554	5.56983
Q9NXH9	TRMT1	tRNA (guanine(26)-N(2))-dimethyltransferase	5	5.96593	5.97507	5.12677	5.80776	5.45346	6.27407	5.49082	5.86643	5.20469	5.68534	5.28672	4.86688	5.20884	5.61736	5.60515	5.87305	5.1564	5.53526
Q8IZ83	ALDH16A1	Aldehyde dehydrogenase family 16 member A1	5	5.55882	5.47215	5.82282	5.47657	5.63211	5.51694	5.4657	5.61498	5.70941	5.31747	5.85684	5.56593	5.42761	5.24805	5.34784	5.4868	5.92443	5.55553
P55263	ADK	Adenosine kinase	5	5.45303	5.73404	5.75089	5.61214	5.41251	5.43431	5.49662	5.559	5.86551	5.37649	5.46736	5.62191	5.30592	5.59353	5.77452	5.55892	5.37479	5.6085
Q9NW82	WDR70	WD repeat-containing protein 70	5	5.47407	5.69509	5.75333	5.55853	5.15436	5.63488	5.473	5.73661	5.30129	5.69879	5.62617	5.75637	5.23927	5.77768	5.55919	5.79544	5.37398	5.39194
O94906	PRPF6	Pre-mRNA-processing factor 6	5	5.5731	5.66392	5.70975	5.61611	5.40899	5.5201	5.5505	5.5367	5.46768	5.38445	5.67402	5.46077	5.63295	5.27328	5.75558	5.453	5.64196	5.67711
Q13576	IQGAP2	Ras GTPase-activating-like protein IQGAP2	5	5.32745	5.86991	5.70351	5.56693	4.99593	5.79431	5.58649	5.66893	5.61484	5.28633	5.35648	5.48548	5.6453	5.47651	4.92785	5.63789	6.1805	5.87535
Q3B7T1	EDRF1	Erythroid differentiation-related factor 1	5	5.5449	5.41528	5.67865	5.8677	5.47863	5.53234	5.45089	5.46739	5.74263	5.24809	5.55713	5.4881	5.6996	5.55289	5.64578	5.34447	5.64663	5.63887
Q5SRE5	NUP188	Nucleoporin NUP188	5	5.56019	5.68603	5.7864	5.73471	5.53817	5.7504	5.4892	5.42843	5.33759	6.08855	5.6123	5.26449	5.43919	5.35232	5.57476	5.21593	5.45208	5.68925
Q32P44	EML3	Echinoderm microtubule-associated protein-like 3	5	5.37408	5.34907	5.56093	6.15697	5.1263	5.96789	5.77974	5.03155	5.62181	5.51374	5.55808	5.63039	5.56603	5.36608	5.52046	5.54975	5.59706	5.73005
Q96SY0	INTS14	Integrator complex subunit 14	5	5.47906	5.08065	5.73445	5.6012	5.48773	5.32187	5.80456	5.39253	5.75497	5.51299	5.52008	5.40023	5.64243	5.43235	5.7085	5.62885	5.80964	5.68794
Q8NFW8	CMAS	N-acylneuraminate cytidylyltransferase	5	5.69206	5.51066	5.60363	5.50404	5.25945	5.6882	5.70709	5.399	5.72115	5.82573	5.72853	5.24803	5.29341	5.59233	5.47742	5.56749	5.7148	5.46698
Q96FS4	SIPA1	Signal-induced proliferation-associated protein 1	5	5.72654	5.2512	5.76662	5.24881	5.5522	5.40205	5.64804	5.36825	5.64669	5.55555	5.77872	5.52645	5.33588	5.44949	5.31472	5.68493	5.81028	5.9336
Q13813-2	SPTAN1	Isoform 2 of Spectrin alpha chain, non-erythrocytic 1	5	5.50674	5.5683	5.2787	6.08308	5.26606	5.09258	5.70063	5.18816	6.02146	5.63196	5.76984	5.64927	5.58794	5.54774	5.83063	4.79258	5.84621	5.63811
Q969F9	HPS3	Hermansky-Pudlak syndrome 3 protein	5	5.59836	5.47297	5.45859	5.36932	5.5841	5.52728	5.57359	5.56179	5.54574	5.3472	5.46645	5.73264	5.56294	5.57904	5.34726	5.87588	5.51326	5.88357
Q8IZA0	KIAA0319L	Dyslexia-associated protein KIAA0319-like protein	5	6.07386	5.58818	5.90366	5.25377	5.72247	5.7964	5.95066	5.23997	6.04836	5.38814	5.46029	5.1206	5.27762	5.38749	5.56094	5.33017	5.62557	5.27187
Q9NZC9	SMARCAL1	SWI/SNF-related matrix-associated actin-dependent regulator of chromatin subfamily A-like protein 1	5	5.63504	4.68792	5.55625	5.64827	5.38816	5.67108	5.38187	5.13503	5.53002	5.63562	6.04458	5.65716	5.89194	5.48063	5.49113	5.78429	5.64971	5.73132
P18206	VCL	Vinculin	5	5.0172	5.84896	5.17743	5.71838	5.4167	5.77992	5.15685	5.54981	5.16897	5.75946	5.31937	5.78886	5.45453	6.29557	5.4783	5.8958	5.2866	5.8873
P06132	UROD	Uroporphyrinogen decarboxylase	5	5.21643	5.72521	5.58198	5.7807	5.68667	5.86185	5.53796	5.33388	5.28234	5.47597	5.51324	5.59825	5.64226	6.01244	5.43184	5.62029	5.07631	5.62239
Q96EA4	SPDL1	Protein Spindly	5	5.51077	5.30212	5.7706	5.30577	5.52845	5.61162	5.40333	5.3097	5.85482	5.53842	5.66747	5.37014	5.72107	5.38783	5.82562	5.52109	5.7314	5.63978
P23588	EIF4B	Eukaryotic translation initiation factor 4B	5	5.88686	6.02586	5.35012	5.38121	5.81432	5.90817	5.3916	5.78578	5.12047	5.60698	5.22186	5.5572	5.69604	5.88678	5.20689	5.85091	5.17176	5.13719
Q9HCC0	MCCC2	Methylcrotonoyl-CoA carboxylase beta chain, mitochondrial	5	5.42461	5.74235	5.50795	5.59186	5.5657	5.72585	5.5864	5.42986	5.45686	5.65571	5.47585	5.48523	5.81597	5.65032	5.76406	5.41221	5.23908	5.47011
Q96GG9	DCUN1D1	DCN1-like protein 1	5	5.74925	5.19451	5.62096	5.52145	6.01563	5.32845	5.62298	5.729	5.61705	5.36323	5.63612	5.56619	5.56067	5.32365	5.59485	5.41911	5.74687	5.39004
Q13155	AIMP2	Aminoacyl tRNA synthase complex-interacting multifunctional protein 2	5	5.46023	5.59048	5.67484	5.81648	5.32673	5.47252	5.54817	5.4303	5.45291	5.67807	5.58457	5.8868	5.23134	5.66671	5.62259	5.44045	5.45464	5.66217
P31153	MAT2A	S-adenosylmethionine synthase isoform type-2	5	5.59831	5.67334	5.507	5.70733	5.52512	5.61638	5.4006	5.45036	5.42761	5.57066	5.46246	5.85495	5.53056	5.49233	5.55245	5.47247	5.49953	5.65852
Q8TDD1-2	DDX54	Isoform 2 of ATP-dependent RNA helicase DDX54	5	5.41548	5.78012	5.55537	5.33258	5.7451	5.44483	5.43448	5.56767	5.41468	5.69742	5.54426	5.8931	5.70287	5.74328	5.81642	5.14533	5.4933	5.27371
P22033	MMUT	Methylmalonyl-CoA mutase, mitochondrial	5	5.68839	5.83744	5.6884	5.26789	5.66786	5.56799	5.81249	5.1851	5.751	5.51889	5.62414	5.8222	5.67035	5.56696	5.59743	5.2585	5.39907	5.07589
O00186	STXBP3	Syntaxin-binding protein 3	5	5.88359	5.44234	5.47118	5.39908	5.78542	5.47278	5.67389	5.58605	5.72793	5.73616	5.61438	5.23032	5.56819	5.19392	5.52691	5.7189	5.56971	5.39925
P17980	PSMC3	26S proteasome regulatory subunit 6A	5	5.29109	5.68549	5.63578	5.40386	5.60047	5.17037	5.27221	5.65698	5.57169	5.68171	5.83861	5.57687	5.70744	5.74925	5.64838	5.71972	5.21416	5.57591
Q14847-2	LASP1	Isoform 2 of LIM and SH3 domain protein 1	5	5.64259	5.42688	5.94469	5.50577	5.56984	5.48392	5.74969	4.5203	5.67448	5.76567	6.04169	5.64748	5.71317	5.53991	5.7592	5.77207	5.46143	4.78122
P49903	SEPHS1	Selenide, water dikinase 1	5	5.58055	5.60575	5.77336	5.6837	5.62049	5.80692	5.65524	5.55737	5.85951	5.5154	5.4826	5.42762	5.38193	5.55106	5.49495	5.2738	5.38038	5.34938
O60287	URB1	Nucleolar pre-ribosomal-associated protein 1	5	5.01314	5.35153	5.79518	6.2237	5.24548	5.32229	5.25243	5.50578	5.51055	5.27994	6.06572	5.74007	4.90364	5.59822	5.55957	5.25802	6.40884	5.9659
Q14146	URB2	Unhealthy ribosome biogenesis protein 2 homolog	5	5.72276	5.23836	5.74572	5.8511	6.13068	5.00825	5.43491	5.58766	5.82266	5.24883	5.29159	5.37815	5.6583	5.31015	5.19483	5.73633	5.75465	5.88508
P42898-2	MTHFR	Isoform 2 of Methylenetetrahydrofolate reductase	5	5.66273	5.50467	5.4895	5.43894	5.70334	5.56337	5.8785	5.83733	5.61154	5.62384	5.49419	5.15875	5.46827	5.59268	5.55242	5.52008	5.43232	5.46754
P46063	RECQL	ATP-dependent DNA helicase Q1	5	5.5188	5.35956	5.44781	5.69696	5.49612	5.49854	5.44073	5.61251	5.76972	5.53392	5.49337	5.53696	5.53146	5.42174	5.5809	5.37525	5.95873	5.72691
P25786-2	PSMA1	Isoform Long of Proteasome subunit alpha type-1	5	5.504	5.36721	5.9926	5.71291	5.6869	5.46913	5.59654	5.45034	5.31759	5.83496	5.27518	5.20509	5.4354	5.36429	5.70067	5.83774	5.41588	5.83357
P99999	CYCS	Cytochrome c	5	5.84458	5.71501	5.46653	5.39838	5.73798	5.37081	5.30827	5.92566	5.45905	5.48006	5.73617	5.39986	5.47049	5.21506	5.63259	5.61679	5.55845	5.66425
Q15075	EEA1	Early endosome antigen 1	5	5.4521	5.24831	5.21712	6.11811	5.68543	5.21429	5.45693	5.38177	5.93695	5.45939	5.98507	5.51598	5.44207	5.57382	5.59695	5.49864	5.40149	5.81557
Q14151	SAFB2	Scaffold attachment factor B2	5	6.05843	5.27521	5.64357	5.39693	5.28787	5.35867	5.38301	5.74464	5.72431	5.43391	5.8028	5.5932	5.86452	5.51802	5.55041	5.30371	5.61788	5.44292
Q92900	UPF1	Regulator of nonsense transcripts 1	5	6.144	5.76906	5.48057	5.33543	5.60531	5.47296	5.43955	5.38752	5.3836	5.24622	6.0769	5.26326	5.57183	5.30481	5.6396	5.20623	6.18466	5.4885
P43686	PSMC4	26S proteasome regulatory subunit 6B	5	5.91671	5.37814	5.29871	5.58895	5.70867	5.6157	5.60562	5.34233	5.47808	5.37448	5.74273	5.54406	5.6043	5.39084	5.56655	5.61373	5.79075	5.43965
P04040	CAT	Catalase	5	5.70132	5.56031	5.37042	5.75314	5.85907	5.8279	5.18835	5.82461	5.67238	5.62314	5.45692	5.40419	5.60856	5.89121	5.40198	5.60605	5.10957	5.14088
Q5JTH9	RRP12	RRP12-like protein	5	5.05356	5.52962	5.18535	5.93731	5.60286	5.83056	5.95316	5.5602	5.54539	5.64785	5.51714	5.61512	5.25561	5.91793	5.48919	5.37793	5.19534	5.78587
Q9H2G2	SLK	STE20-like serine/threonine-protein kinase	5	5.43861	5.56934	5.49839	5.56129	5.32382	5.57612	5.60945	5.61265	5.62353	5.61908	5.67358	5.67043	5.43122	5.36653	5.48005	5.59339	5.78461	5.56794
P11498	PC	Pyruvate carboxylase, mitochondrial	5	5.61778	5.71874	5.48912	5.06712	5.53606	5.59704	5.52533	5.45237	5.78433	5.55656	5.51357	5.06893	5.8667	5.3698	5.65677	5.67315	5.86747	5.63917
O43149	ZZEF1	Zinc finger ZZ-type and EF-hand domain-containing protein 1	5	5.57793	5.66558	5.43174	6.03523	5.37753	5.77059	5.82967	5.5387	5.32881	5.45253	5.24747	5.65786	5.42447	5.53591	5.42671	5.74285	5.42131	5.53513
P49411	TUFM	Elongation factor Tu, mitochondrial	5	5.35215	5.60204	5.58983	5.53843	5.45056	5.45969	5.49618	5.41178	5.63635	5.52324	5.50821	5.64047	5.64622	5.66225	5.29581	5.58746	5.89488	5.70446
Q8IZ69	TRMT2A	tRNA (uracil-5-)-methyltransferase homolog A	5	5.14494	5.81623	5.71863	5.76599	5.63851	5.74656	5.34054	5.55217	5.19136	5.67894	5.18258	5.29914	5.4172	6.14413	5.82441	5.60918	5.27197	5.65753
Q9UJU6-2	DBNL	Isoform 2 of Drebrin-like protein	5	5.63492	5.59615	5.8188	5.7844	5.51026	5.89358	5.69315	5.5485	5.245	5.49412	5.34598	5.55008	5.33023	5.65603	5.42702	5.65366	5.19597	5.62215
P17480	UBTF	Nucleolar transcription factor 1	5	5.74687	5.77028	5.33888	5.58073	5.27519	5.57056	5.44224	5.73282	5.53115	5.6262	5.47216	5.66053	5.14887	5.49335	5.28775	5.853	5.54451	5.92493
Q5T0F9	CC2D1B	Coiled-coil and C2 domain-containing protein 1B	5	5.51241	5.51842	5.33193	5.4292	5.41738	5.68774	5.56571	5.80594	5.77593	5.628	5.53577	5.74115	5.56324	5.54311	5.45082	5.4569	5.36258	5.67375
Q13151	HNRNPA0	Heterogeneous nuclear ribonucleoprotein A0	5	5.5496	5.11471	5.99484	5.54548	5.78176	5.14906	6.01748	5.03437	5.88543	5.56764	5.6977	5.29796	5.63929	5.39017	5.83585	5.17931	5.71172	5.60763
Q9HCK8	CHD8	Chromodomain-helicase-DNA-binding protein 8	5	5.7047	5.28434	5.55238	5.52872	5.45112	5.39477	5.5201	5.39184	5.69145	5.60169	5.70591	5.63855	5.39095	5.66588	5.51172	5.41564	5.81174	5.7385
Q8TD26	CHD6	Chromodomain-helicase-DNA-binding protein 6	5	5.49879	5.51554	5.77073	5.7119	5.50737	5.4699	5.47128	5.175	5.51852	5.50413	5.76865	5.6528	5.67515	5.37564	5.62615	5.43261	5.90616	5.41966
Q96QU8	XPO6	Exportin-6	5	5.75249	5.64966	5.47709	5.59429	5.60064	5.9269	5.32352	5.63478	5.41716	5.75654	5.15594	5.52102	5.78949	5.56239	5.54764	5.5653	5.49293	5.23222
A2RTX5	TARS3	Threonine--tRNA ligase 2, cytoplasmic	5	5.34034	5.49851	5.54233	5.74339	5.80789	5.41371	5.52245	5.67185	5.38067	5.67144	5.48474	5.80199	5.32063	5.80025	5.38729	5.44062	5.37882	5.79308
O00231-2	PSMD11	Isoform 2 of 26S proteasome non-ATPase regulatory subunit 11	5	5.70961	5.78278	5.79014	5.53593	5.49652	5.55831	5.51307	5.66772	5.68575	5.50666	5.63768	5.38413	5.51459	5.22706	5.63031	5.62869	5.39765	5.33339
Q96ST3	SIN3A	Paired amphipathic helix protein Sin3a	5	5.69806	5.36424	5.48217	5.63021	5.54177	5.71507	5.48902	5.57705	5.6646	5.47373	5.60556	5.42344	5.80225	5.2635	5.73751	5.32705	5.68207	5.5227
Q15024	EXOSC7	Exosome complex component RRP42	5	5.94072	5.57821	5.68937	5.38793	5.65159	5.90813	5.64419	5.54997	5.62758	5.40465	5.54216	5.63267	5.25672	5.45642	5.40209	5.3161	5.72615	5.28536
Q2TBE0	CWF19L2	CWF19-like protein 2	5	5.51423	5.54233	5.56565	5.72075	5.44426	5.97079	5.66637	5.56607	5.6176	5.36663	5.53862	5.68952	5.43481	5.90028	5.5916	5.40774	5.03581	5.42694
P49454	CENPF	Centromere protein F	5	5.52296	5.39409	5.47573	5.46773	5.43042	5.2977	5.61652	5.52315	5.59982	5.76648	5.56017	5.56958	5.71842	5.53175	5.70487	5.44093	5.7036	5.67609
Q15050	RRS1	Ribosome biogenesis regulatory protein homolog	5	6.0269	5.3043	5.3681	6.06665	5.49545	5.30699	5.88378	5.42663	5.42293	5.42556	5.74888	5.42197	5.2197	5.20879	5.60495	5.36357	6.14158	5.56329
O75400	PRPF40A	Pre-mRNA-processing factor 40 homolog A	5	5.67863	5.34085	5.65582	5.4514	5.61886	5.40686	5.5235	5.44229	5.64624	5.3544	5.71097	5.63194	5.79454	5.39958	5.58183	5.35306	5.65592	5.7533
Q6ZRS2	SRCAP	Helicase SRCAP	5	5.76908	5.80753	5.68845	5.3302	5.55049	5.3959	5.66252	5.67492	5.95729	5.45522	5.4673	5.11939	5.33932	5.31392	5.69099	5.51214	5.76748	5.49785
O00139-4	KIF2A	Isoform 4 of Kinesin-like protein KIF2A	5	5.4113	5.4815	5.31585	5.40448	5.51431	5.48473	5.70238	5.54734	5.44766	5.78565	5.51641	5.49851	5.64586	5.76787	5.72688	5.6523	5.51168	5.5853
O95757	HSPA4L	Heat shock 70 kDa protein 4L	5	4.90075	5.60711	5.29155	5.99078	5.1318	5.51633	5.79378	5.24793	5.27273	5.42375	5.7218	6.04814	5.27066	6.81796	6.13465	5.3743	5.00997	5.446
Q15436	SEC23A	Protein transport protein Sec23A	5	5.7836	5.28099	5.63807	5.34815	5.30674	5.79185	5.81691	5.39944	5.81221	5.50797	5.37936	5.85394	5.50623	5.23548	5.22866	5.64211	5.58201	5.88625
Q96MW5	COG8	Conserved oligomeric Golgi complex subunit 8	5	5.55584	5.83244	5.92278	5.71076	5.24463	5.77043	5.53699	5.45859	5.64561	5.52921	5.08304	5.8652	5.39214	5.21277	5.3812	5.46423	5.49863	5.89551
Q8TAT6-2	NPLOC4	Isoform 2 of Nuclear protein localization protein 4 homolog	5	5.75712	5.62037	5.68072	5.60082	5.48879	5.54502	5.80047	5.60887	5.71408	5.44266	5.65538	5.24565	5.50911	5.29031	5.63904	5.24858	5.80422	5.34879
O60488	ACSL4	Long-chain-fatty-acid--CoA ligase 4	5	5.80924	5.60875	5.64525	5.61225	5.37878	5.38098	5.40191	5.08019	5.39528	5.35583	5.5913	6.02489	5.83585	5.05263	5.59391	5.68661	6.1235	5.42286
Q14166	TTLL12	Tubulin--tyrosine ligase-like protein 12	5	5.63879	5.54946	5.47123	5.62097	5.84764	5.72288	5.5473	5.33475	5.39	5.60392	5.54972	5.62448	5.54821	5.77388	5.60296	5.58195	5.58686	5.00499
P98082	DAB2	Disabled homolog 2	5	5.14551	5.68996	5.06141	5.58373	5.69199	5.63131	5.35007	5.54769	5.55848	5.52779	5.2619	6.12764	5.66027	5.52944	5.64167	5.86639	5.36147	5.76328
P53041	PPP5C	Serine/threonine-protein phosphatase 5	5	5.49233	5.67643	5.56431	5.74694	5.65928	5.47259	5.55673	5.32329	5.49488	5.48695	5.42406	5.63552	5.79571	5.59982	5.64429	5.45329	5.55175	5.42182
P61026	RAB10	Ras-related protein Rab-10	5	5.3998	5.7322	5.85234	5.53742	5.33223	5.69578	5.49402	5.67696	5.62476	5.53518	5.49345	5.64531	5.62664	5.55997	5.35627	5.23332	5.45662	5.74773
Q9Y3I0	RTCB	RNA-splicing ligase RtcB homolog	5	5.22754	5.93674	5.24908	5.46909	5.69065	5.82066	5.58508	5.63943	5.48768	5.60615	5.61044	5.76467	5.56918	5.89688	5.531	5.22731	5.18836	5.50005
Q12873-3	CHD3	Isoform 3 of Chromodomain-helicase-DNA-binding protein 3	5	5.69285	5.42029	5.22488	5.1494	5.56725	5.81624	5.68983	5.6535	5.39729	5.53249	5.4055	5.52104	5.36774	5.65408	5.72321	5.4104	5.85854	5.91545
Q01968	OCRL	Inositol polyphosphate 5-phosphatase OCRL	5	5.7935	5.54765	5.52652	5.52874	5.51022	5.79302	5.59177	5.36493	5.58963	5.58799	5.48901	5.48105	5.40683	5.51073	5.53633	5.71717	5.52366	5.50125
Q9NQW7-3	XPNPEP1	Isoform 3 of Xaa-Pro aminopeptidase 1	5	5.97199	6.11724	5.41986	5.29853	5.89206	5.64518	5.89173	5.16392	5.26198	5.19131	5.8029	5.72452	5.43513	5.36728	5.34744	5.64337	5.47675	5.34882
Q15042-3	RAB3GAP1	Isoform 2 of Rab3 GTPase-activating protein catalytic subunit	5	5.66899	5.40684	5.5952	5.21764	5.39772	5.50322	5.54498	5.51881	5.85131	5.6227	5.64433	5.57767	5.54276	5.63681	5.85471	5.32389	5.6974	5.39504
Q9H6E5	TUT1	Speckle targeted PIP5K1A-regulated poly(A) polymerase	5	6.22996	5.35782	5.14366	6.22515	5.98888	5.85095	5.42681	6.00307	6.11626	5.10738	4.91731	5.42683	5.10605	5.26993	5.71482	5.16764	5.38336	5.56412
Q08J23	NSUN2	RNA cytosine C(5)-methyltransferase NSUN2	5	5.33856	5.28657	5.52617	5.66769	5.80184	5.73057	5.61752	5.65252	5.50321	5.50495	5.43195	5.62356	5.51497	5.47108	5.58929	5.58667	5.485	5.66788
Q9H8V3-3	ECT2	Isoform 3 of Protein ECT2	5	5.2276	5.80457	5.32907	5.52457	5.26078	5.66516	5.48296	5.57606	5.1402	5.72243	5.17531	5.83196	5.57163	5.90886	5.47938	6.00663	5.52809	5.76474
Q9UFC0	LRWD1	Leucine-rich repeat and WD repeat-containing protein 1	5	5.49136	5.73741	5.73719	5.9497	5.17236	5.45306	5.55032	5.25947	5.20291	5.5766	5.91328	5.54653	5.5258	5.81878	5.88809	5.09954	5.50361	5.57399
Q9Y6R4-2	MAP3K4	Isoform 2 of Mitogen-activated protein kinase kinase kinase 4	5	5.47389	5.51546	5.56484	5.61147	5.30396	5.95831	5.60623	5.6418	5.55001	5.61049	5.24798	5.20826	5.57721	6.00266	5.31504	5.63196	5.39963	5.78078
Q9P258	RCC2	Protein RCC2	5	5.40314	5.73495	5.32894	5.99294	5.28507	5.41409	5.26052	5.7251	5.33855	5.61692	5.6828	5.64753	5.51332	5.76123	5.5598	5.52599	5.36298	5.84614
Q14558-2	PRPSAP1	Isoform 2 of Phosphoribosyl pyrophosphate synthase-associated protein 1	5	5.36165	5.65637	5.49698	5.70383	5.50327	5.61802	5.38013	5.79628	5.6311	5.35548	5.37485	5.59858	5.26487	5.61298	5.52125	5.76258	5.74983	5.61193
Q9UQ35	SRRM2	Serine/arginine repetitive matrix protein 2	5	5.59076	5.75684	5.53201	5.17676	5.35605	5.43681	5.71355	5.8796	5.41567	5.10038	5.55444	5.33532	5.91295	5.41346	5.77391	5.66119	5.55234	5.83796
O00299	CLIC1	Chloride intracellular channel protein 1	5	5.70577	5.63406	5.66363	5.43161	5.83928	5.58844	5.59956	5.94291	5.83648	5.46361	5.38127	5.37922	5.48223	5.48728	5.62381	5.42229	5.30696	5.21158
P30876	POLR2B	DNA-directed RNA polymerase II subunit RPB2	5	5.76512	5.67986	5.82148	5.24023	5.73722	5.25641	5.56982	5.44113	5.83931	5.38631	5.51455	5.29232	5.95139	5.3617	5.53288	5.47438	5.75889	5.37701
Q96DG6	CMBL	Carboxymethylenebutenolidase homolog	5	5.98177	5.67626	5.85659	5.37436	5.7805	5.30167	5.53379	5.54803	5.63798	5.50151	5.94171	5.66597	5.48889	5.24399	5.51251	5.3015	5.42899	5.22398
P48200	IREB2	Iron-responsive element-binding protein 2	5	5.39306	5.98429	5.65698	5.63038	5.48698	5.67886	5.77355	5.84715	6.0452	5.30717	5.19774	5.80138	5.4919	5.42518	5.51331	5.4222	4.91823	5.42645
P62253	UBE2G1	Ubiquitin-conjugating enzyme E2 G1	5	5.11353	5.8107	5.89705	5.41672	5.76029	5.384	5.79743	4.7121	5.48371	5.89086	5.67512	6.06156	5.63247	5.57225	5.62704	5.77104	5.1265	5.26763
Q96PK6	RBM14	RNA-binding protein 14	5	5.74429	5.47612	5.65217	5.42708	5.61216	5.51786	5.78108	5.34315	5.60313	5.64193	5.7148	5.46655	5.62678	5.54096	5.79746	5.51471	5.40503	5.13476
Q9BYJ9	YTHDF1	YTH domain-containing family protein 1	5	5.76613	5.29475	5.15848	5.53691	5.89743	5.78249	5.28125	5.71956	5.63968	5.8095	5.60415	5.35599	5.20515	5.42198	5.59669	5.48623	5.70072	5.74289
P04080	CSTB	Cystatin-B	5	5.26531	5.28805	5.34875	5.45723	5.75448	5.30842	5.66476	5.45143	5.48467	5.59364	6.03304	5.67382	5.64159	5.73813	5.68107	5.84946	5.26365	5.5025
Q9Y2A7-2	NCKAP1	Isoform 2 of Nck-associated protein 1	5	5.65465	5.33004	5.61083	5.56404	5.68642	5.0701	5.40562	5.86188	5.65812	4.9351	5.8728	5.76345	5.405	5.6834	5.45275	5.50248	5.82295	5.72036
P16401	H1-5	Histone H1.5	5	5.27024	5.73404	5.31804	5.52705	5.52921	5.42214	5.55362	5.46974	5.66494	5.85288	5.36228	5.40562	5.88799	5.52994	5.71253	5.41201	5.61178	5.73598
Q03001	DST	Dystonin	5	5.50576	5.63512	5.61469	5.56476	5.79178	5.66796	5.44196	5.55498	5.72789	5.42162	5.46714	5.55574	5.49315	5.57393	5.44374	5.27941	5.64231	5.61806
Q9BZQ8	NIBAN1	Protein Niban 1	5	5.8798	5.64822	5.59075	5.29375	5.71679	5.70134	5.69103	5.83632	5.42567	5.45795	5.39144	5.31137	5.12104	5.68253	5.95431	5.65801	4.97517	5.66449
P11532	DMD	Dystrophin	5	5.52004	5.45177	5.88033	5.47068	5.17143	6.14958	5.51832	5.91324	5.41809	5.44806	5.50331	5.74795	5.11931	5.55254	5.34609	5.40819	5.75292	5.62814
Q8WUM0	NUP133	Nuclear pore complex protein Nup133	5	5.42231	5.46321	5.53544	5.49656	5.63832	5.19588	5.51179	5.49676	5.99942	5.46896	5.64529	5.29999	5.684	5.4988	5.64925	5.37972	5.93673	5.67758
Q9H583	HEATR1	HEAT repeat-containing protein 1	5	5.74781	5.54511	5.72259	5.45313	5.55555	5.35904	5.66755	5.6218	5.71278	5.39917	5.65175	5.17841	5.7232	5.59407	5.6989	5.35256	5.67665	5.33992
Q8NEV1	CSNK2A3	Casein kinase II subunit alpha 3	5	5.37498	5.41919	5.56487	5.51922	5.5257	5.39442	5.57435	5.44664	5.76092	5.3657	5.71002	5.75089	5.64123	5.50534	5.76942	5.45866	5.61971	5.59873
Q5MIZ7	PPP4R3B	Serine/threonine-protein phosphatase 4 regulatory subunit 3B	5	5.67478	5.5251	5.39951	5.68564	5.71453	5.52429	5.10034	5.3294	5.51036	5.45212	5.33543	5.6749	5.53198	5.82428	5.80591	5.66742	5.60935	5.63467
P50542-2	PEX5	Isoform 2 of Peroxisomal targeting signal 1 receptor	5	5.42587	5.37397	5.53458	5.70134	5.16987	5.86304	5.74377	5.43866	5.55528	5.57257	5.26587	5.55529	5.6821	5.26356	5.65005	5.46457	5.6946	6.045
Q7L014	DDX46	Probable ATP-dependent RNA helicase DDX46	5	5.9037	5.3663	5.15057	5.15512	5.41427	5.64785	5.34237	5.45852	6.00569	5.41077	5.35213	5.85919	5.83594	5.70299	5.57567	5.77691	5.62715	5.41486
Q9NYL9	TMOD3	Tropomodulin-3	5	5.49459	5.77992	5.4326	5.50049	5.43486	5.47735	5.58464	5.76545	5.53682	5.69921	5.57196	5.55964	5.8252	5.54883	5.32616	5.74185	5.27318	5.44724
Q6ZN55-2	ZNF574	Isoform 2 of Zinc finger protein 574	5	5.62437	5.985	5.47705	5.42782	5.54598	5.62449	5.53575	5.56782	5.56586	5.50668	5.32808	5.45075	5.54898	5.59458	5.60776	5.71879	5.29767	5.59255
Q9Y6X3	MAU2	MAU2 chromatid cohesion factor homolog	5	5.69431	5.80016	5.79288	5.66273	5.37931	5.68934	5.56148	5.44301	5.35658	5.54058	5.2618	5.53958	5.37254	5.6979	5.29536	5.75282	5.38746	5.77217
O75688	PPM1B	Protein phosphatase 1B	5	5.60693	5.47633	5.34841	5.66693	5.47818	5.6268	5.57299	5.77506	5.39923	5.64214	5.69216	5.52783	5.34298	5.74661	5.40214	5.50367	5.56336	5.62825
O75390	CS	Citrate synthase, mitochondrial	5	5.53816	5.57269	5.35659	5.68289	5.62051	5.26202	5.65436	5.52525	5.78257	5.61152	5.61942	5.90888	5.57942	5.2274	5.2453	5.47602	5.48072	5.85628
P06493	CDK1	Cyclin-dependent kinase 1	5	5.49567	5.69557	5.54183	5.58682	5.71286	5.56223	5.73388	5.77616	5.56526	5.35901	5.8255	5.40587	5.5911	5.2269	5.41189	5.43314	5.36248	5.71381
Q8IVT5	KSR1	Kinase suppressor of Ras 1	5	5.82385	5.97337	6.00058	5.51351	5.39227	5.62318	5.43327	5.53598	5.52953	5.59851	5.87075	5.30944	5.3965	5.198	5.52415	5.71518	5.27094	5.29099
Q9P2Y5	UVRAG	UV radiation resistance-associated gene protein	5	5.6343	5.32362	5.7806	5.44345	5.61512	5.28927	5.60841	5.66731	5.50284	5.47703	5.53432	5.55558	5.56997	5.4084	5.64813	5.66895	5.82053	5.45217
O95372	LYPLA2	Acyl-protein thioesterase 2	5	5.73846	4.72518	5.87172	5.29987	5.70423	5.64927	5.69858	5.49208	5.4748	5.29569	5.65422	5.89229	5.56409	5.27705	5.73364	5.65589	5.42849	5.84445
Q6KC79	NIPBL	Nipped-B-like protein	5	5.51703	5.70748	5.53831	5.54921	5.41382	5.44798	5.60399	5.79112	5.73999	5.82439	5.44821	5.28051	5.60607	5.53971	5.64533	5.26432	5.58336	5.49916
O14818	PSMA7	Proteasome subunit alpha type-7	5	5.84829	5.33548	5.62345	5.40004	5.70012	5.58135	5.73041	5.69904	5.61771	5.12176	5.51683	5.2683	5.73128	5.3382	5.75114	5.52642	5.51694	5.6932
P09622	DLD	Dihydrolipoyl dehydrogenase, mitochondrial	5	5.60291	5.83722	5.4435	5.65004	5.45506	5.43082	5.64621	5.50913	5.51354	5.35128	5.53902	5.63293	5.49958	5.98941	5.55889	5.67017	5.35099	5.3193
O95613	PCNT	Pericentrin	5	5.85255	5.56274	5.81484	5.55599	5.60694	5.57357	5.40136	5.51937	5.59801	5.4451	5.68815	5.38258	5.53537	5.23592	5.52161	5.63562	5.50287	5.56741
Q9UI10-2	EIF2B4	Isoform 2 of Translation initiation factor eIF-2B subunit delta	5	5.95956	5.67234	5.86121	5.91428	5.70765	5.64799	5.59516	5.75609	5.50377	5.73568	5.51842	5.29603	5.28402	5.21963	5.03763	5.19941	5.60829	5.48285
Q9Y314	NOSIP	Nitric oxide synthase-interacting protein	5	5.29455	5.87405	5.69637	5.48828	5.74932	5.75929	5.4797	5.34353	5.42399	5.56652	5.77282	5.40028	5.60458	5.73012	5.42967	5.55102	5.34683	5.48907
O75330-3	HMMR	Isoform 3 of Hyaluronan mediated motility receptor	5	5.38785	5.45099	5.41238	5.48163	5.49327	5.43612	5.47114	5.68784	5.47258	5.44142	5.72223	5.62588	5.65099	5.56068	5.80811	5.65815	5.65026	5.5885
P15311	EZR	Ezrin	5	5.6477	5.97101	5.34871	5.66863	5.38613	5.77397	5.36447	5.65018	5.37999	5.39606	5.39623	5.23038	5.61952	5.36143	5.3849	5.92826	5.65374	5.8387
P62249	RPS16	40S ribosomal protein S16	5	5.50004	5.42764	5.52688	5.45428	5.16527	5.48459	5.39159	5.32296	5.70134	5.70716	5.6837	5.45308	5.92348	5.55939	5.68145	5.34964	5.84357	5.82396
Q6P4Q7	CNNM4	Metal transporter CNNM4	5	5.59073	5.51552	5.67395	5.26159	5.31556	5.50023	5.50885	5.57135	5.79131	5.57911	5.83892	5.59398	5.4145	5.25055	5.47565	5.51602	5.91024	5.69192
P17858-2	PFKL	Isoform 2 of ATP-dependent 6-phosphofructokinase, liver type	5	5.99139	6.03698	5.16245	5.64446	5.65067	5.60647	5.38567	5.66419	5.435	5.53938	5.52792	5.61097	5.64705	5.90332	5.36347	5.43078	5.28672	5.1131
P04899-4	GNAI2	Isoform sGi2 of Guanine nucleotide-binding protein G(i) subunit alpha-2	5	5.98803	5.77636	5.7601	5.52566	5.64418	5.82114	5.77531	5.52578	5.66074	5.25067	5.737	5.3483	5.44753	5.45689	5.33258	5.42611	5.49728	5.02634
Q9Y485	DMXL1	DmX-like protein 1	5	5.32919	5.85755	5.46664	6.0563	5.76229	5.50651	5.38657	5.65523	5.28517	5.42328	5.55502	5.73958	5.4848	5.11329	5.15583	6.23713	5.35263	5.63297
Q15276	RABEP1	Rab GTPase-binding effector protein 1	5	5.60526	5.76829	5.55216	5.66505	5.42144	5.45149	5.5879	5.58955	5.60724	5.60424	5.50546	5.37102	5.4497	5.60019	5.60395	5.50014	5.53394	5.58299
Q14152	EIF3A	Eukaryotic translation initiation factor 3 subunit A	5	5.16713	5.43759	5.1805	5.92977	5.31416	5.52269	5.32498	5.56182	5.28413	5.52407	5.60486	5.92934	5.55415	5.71401	5.69336	5.72098	5.4373	6.09917
Q3T8J9	GON4L	GON-4-like protein	5	5.31947	5.85062	5.44256	5.60663	5.30179	5.79003	5.69563	5.62652	5.58605	5.40818	5.05814	5.53697	5.74742	5.75972	5.6705	5.65827	5.2513	5.6902
Q96KG9	SCYL1	N-terminal kinase-like protein	5	5.80115	5.59328	5.45415	5.63644	6.04406	5.49181	5.46291	5.30806	5.62774	5.45784	5.64641	5.07828	5.53516	5.6273	5.51774	5.8234	5.66777	5.2265
Q9GZL7	WDR12	Ribosome biogenesis protein WDR12	5	5.65812	5.63067	5.43662	5.22921	5.41342	5.65274	5.43924	5.67076	5.63281	5.58563	5.43257	5.44937	5.58211	5.58487	5.4997	5.74943	5.79962	5.55314
Q96HA1	POM121	Nuclear envelope pore membrane protein POM 121	5	5.45389	5.77451	5.6973	5.46013	5.68347	5.65412	5.41137	5.44219	5.53575	5.86151	5.83322	5.54601	5.3833	5.56893	5.80296	5.57564	5.27607	5.03965
P07384	CAPN1	Calpain-1 catalytic subunit	5	5.62024	5.77684	5.47868	5.44832	5.63471	5.61056	5.48916	5.56965	5.48119	5.6002	5.51462	5.5282	5.61299	5.47002	5.59648	5.72897	5.43426	5.40492
P54760	EPHB4	Ephrin type-B receptor 4	5	5.79365	5.86566	5.50115	5.38667	5.64027	5.29594	5.46629	5.78991	5.67952	5.263	5.6126	5.50856	5.42749	5.27406	5.42144	5.53853	5.69013	5.84512
P48681	NES	Nestin	5	5.87628	5.13086	6.00762	5.75812	5.05439	5.31786	5.67024	5.29782	5.61363	5.45236	5.52659	5.84048	5.42427	5.58345	5.81453	5.5089	5.84676	5.27582
Q96P48	ARAP1	Arf-GAP with Rho-GAP domain, ANK repeat and PH domain-containing protein 1	5	6.33194	5.75098	5.45508	5.47304	5.26188	5.3775	5.21874	5.63885	5.53744	5.51519	5.38774	5.67738	5.50138	5.61615	5.77583	5.63004	5.6818	5.16905
O43159	RRP8	Ribosomal RNA-processing protein 8	5	5.33507	5.38591	5.65219	5.65251	5.44076	5.45038	5.61694	5.53035	5.6868	5.39359	5.75809	5.63666	5.59798	5.20846	5.74341	5.40544	5.66697	5.83847
Q12797	ASPH	Aspartyl/asparaginyl beta-hydroxylase	5	5.62827	5.60104	5.33318	5.48343	5.50519	5.7466	5.43448	5.52472	5.69872	5.36781	5.61182	5.8169	5.61447	5.47979	5.5676	5.33278	5.62821	5.62499
Q9BX68	HINT2	Histidine triad nucleotide-binding protein 2, mitochondrial	5	4.42861	5.57592	5.94652	5.51492	5.77353	5.41797	6.25376	4.81201	4.674	5.7847	6.0643	6.3693	5.91609	6.08313	5.38229	5.86432	4.60931	5.52932
Q9UMX0	UBQLN1	Ubiquilin-1	5	5.60512	4.93906	5.75916	5.73973	5.34432	5.70094	5.81782	5.57846	5.76667	5.7094	5.3656	5.56542	5.55362	5.22475	5.52166	5.67007	5.34446	5.79372
Q9BZ29-4	DOCK9	Isoform 4 of Dedicator of cytokinesis protein 9	5	5.22189	5.16764	5.79698	5.81782	5.6376	5.76783	5.3798	5.59912	5.6088	5.15346	5.64562	5.80381	5.6979	5.19145	5.48832	5.45015	5.5989	5.9729
Q9Y265	RUVBL1	RuvB-like 1	5	5.61566	5.66169	5.7547	5.52902	5.51956	6.02388	5.53012	6.00675	5.63304	5.32842	5.27171	5.51631	5.52886	5.3849	5.52759	5.42994	5.38189	5.35598
Q8IV38	ANKMY2	Ankyrin repeat and MYND domain-containing protein 2	5	5.55948	5.32035	5.66069	5.64527	5.51234	5.31109	5.49364	5.36271	5.65443	5.60403	5.87242	5.43239	5.4525	5.19046	5.69925	5.44717	5.96042	5.82137
Q9NNW7	TXNRD2	Thioredoxin reductase 2, mitochondrial	5	5.82307	5.45337	5.45387	5.62622	5.51792	5.94338	5.20841	5.44535	6.10453	5.3872	5.24035	5.5222	5.29525	5.7761	5.40215	5.5457	5.30287	5.95205
Q16881	TXNRD1	Thioredoxin reductase 1, cytoplasmic	5	5.74789	5.22415	5.96871	5.89396	5.49569	5.8511	5.67355	5.81692	5.61671	5.41022	5.41534	5.35633	5.32384	5.55303	5.26424	5.61763	5.22677	5.54393
Q8NEC7	GSTCD	Glutathione S-transferase C-terminal domain-containing protein	5	5.2572	5.70915	5.58442	5.61306	5.21442	5.63337	5.47509	5.61724	5.45894	5.73137	5.39373	5.75043	5.63168	5.51443	5.41965	5.80953	5.47553	5.71077
Q96FZ2	HMCES	Abasic site processing protein HMCES	5	5.43608	5.45402	5.62069	5.72805	5.37921	5.65054	5.42049	5.38272	5.76411	5.86174	5.68881	5.76318	5.0091	5.59088	5.54712	5.47326	5.67584	5.55417
O43166	SIPA1L1	Signal-induced proliferation-associated 1-like protein 1	5	5.41805	5.47668	5.66246	5.83678	5.60855	5.75774	5.57412	5.58212	5.35173	5.43891	5.72934	5.76782	5.31428	5.27296	5.38884	5.50301	5.73758	5.57904
Q6P3W7	SCYL2	SCY1-like protein 2	5	5.28364	5.58288	5.5919	5.40331	5.40803	5.5945	5.32665	5.20185	5.55126	5.60674	5.3428	5.90105	5.8783	5.7894	5.46844	6.19708	5.53704	5.33512
P49756	RBM25	RNA-binding protein 25	5	5.40367	5.42995	5.66017	5.57153	5.39929	5.45467	5.64979	5.76595	5.43837	5.41243	5.70461	5.5519	5.43412	5.54863	5.69807	5.56004	5.56222	5.75459
O15014	ZNF609	Zinc finger protein 609	5	6.18124	6.48904	6.0747	4.67284	4.56612	5.09011	5.81068	6.17066	5.47909	6.17214	5.87454	5.91137	4.73512	4.6431	4.62233	5.73872	5.77918	5.98902
Q6P4R8-2	NFRKB	Isoform 2 of Nuclear factor related to kappa-B-binding protein	5	5.82079	5.46146	5.5877	5.68295	5.29808	5.54862	5.65507	5.5243	5.31738	5.56355	5.44343	5.57614	5.51322	5.52792	5.79887	5.4168	5.68751	5.57623
Q8IWZ8	SUGP1	SURP and G-patch domain-containing protein 1	5	5.96417	5.5894	5.38895	5.71671	5.34869	5.66691	5.37298	5.47454	5.35737	5.73741	5.44739	5.51801	5.26787	5.60961	5.56082	5.60852	5.54348	5.82715
Q7L8L6	FASTKD5	FAST kinase domain-containing protein 5, mitochondrial	5	5.77102	5.73905	5.50438	5.69056	5.74628	6.03065	5.29662	5.75594	5.50649	5.69604	5.16223	5.43419	5.56123	5.67585	5.37179	5.62554	5.16763	5.26452
Q9Y295	DRG1	Developmentally-regulated GTP-binding protein 1	5	5.54286	5.40169	5.59219	5.56013	5.53699	5.57726	5.39357	5.64242	5.80602	5.25828	5.44656	5.48245	5.6583	5.49224	5.60853	5.51587	5.79238	5.69227
Q96Q11	TRNT1	CCA tRNA nucleotidyltransferase 1, mitochondrial	5	5.66905	5.55463	5.20846	5.44166	5.38444	5.26165	5.86264	5.76323	5.15957	5.4266	5.7735	6.19278	5.45159	5.2387	5.35204	5.81874	5.63432	5.80642
P48637	GSS	Glutathione synthetase	5	6.37838	4.70648	5.77369	4.78738	4.82632	5.76195	5.50891	6.25808	4.97014	5.31398	5.68767	5.26577	4.89737	5.97034	5.54901	6.3855	5.12489	6.83415
Q9P275	USP36	Ubiquitin carboxyl-terminal hydrolase 36	5	5.72478	5.99126	5.53365	5.37776	5.52895	5.44742	5.61565	5.50496	5.65467	6.06023	5.55249	5.17089	5.06622	5.76273	5.28171	5.31796	5.72482	5.68384
Q93074-2	MED12	Isoform 2 of Mediator of RNA polymerase II transcription subunit 12	5	5.70914	5.83988	5.64718	5.48244	5.34835	5.58471	5.81065	5.73351	5.52053	5.49998	5.57979	5.47069	5.60267	5.39871	5.39761	5.37076	5.56303	5.44036
Q92973	TNPO1	Transportin-1	5	5.68104	5.57347	5.3893	5.69347	5.56538	5.36863	5.23183	5.99013	5.39592	5.5602	5.69978	5.46887	5.49732	5.56668	5.46561	5.62159	5.55053	5.68025
O75787	ATP6AP2	Renin receptor	5	5.43003	5.75572	5.42828	5.38991	5.4933	5.50251	5.63001	5.72937	5.49901	5.7274	5.33226	5.57733	5.74231	5.65073	5.52045	5.5853	5.36974	5.63634
Q9UPY3	DICER1	Endoribonuclease Dicer	5	5.73328	5.33218	5.39735	5.46656	5.89033	5.21751	5.83637	5.07437	5.80528	5.23386	5.81409	5.5364	5.31957	5.2039	5.74395	5.37383	5.96091	6.06028
Q86VN1	VPS36	Vacuolar protein-sorting-associated protein 36	5	5.60979	5.61987	5.48101	5.62548	5.79366	5.66916	5.60801	5.6538	5.63447	5.51931	5.39163	5.5238	5.3564	5.54075	5.56361	5.49772	5.35832	5.55322
O00629	KPNA4	Importin subunit alpha-3	5	5.37813	5.57461	5.66531	5.69077	5.38438	5.4827	5.43136	5.27408	5.8639	5.21074	5.88098	5.677	5.66392	5.41385	5.64558	5.33126	5.80699	5.62443
P30154-2	PPP2R1B	Isoform 2 of Serine/threonine-protein phosphatase 2A 65 kDa regulatory subunit A beta isoform	5	5.38837	5.39693	5.55206	5.59792	5.54936	5.49464	5.64335	5.80233	5.56837	5.42518	5.45849	5.48703	5.70912	5.46556	5.63814	5.69153	5.44195	5.68969
P27144	AK4	Adenylate kinase 4, mitochondrial	5	5.64183	5.67538	5.63271	5.69608	5.81089	5.31157	5.66685	5.54538	5.3795	5.77695	5.45758	5.33774	5.64313	5.54476	5.39715	5.3458	5.70222	5.43448
Q9Y6Y0	IVNS1ABP	Influenza virus NS1A-binding protein	5	5.53264	5.34609	5.64423	5.87673	5.47423	5.20476	5.33904	5.84065	5.61273	5.37044	5.34172	5.74396	5.25355	5.6008	5.44884	5.35932	5.94092	6.06934
Q8NEB9	PIK3C3	Phosphatidylinositol 3-kinase catalytic subunit type 3	5	5.57552	5.7586	5.45706	5.21946	5.60492	5.56321	5.43729	5.60656	5.49078	5.52608	5.54109	5.57262	5.58851	5.62139	5.75843	5.6997	5.62895	5.34981
P84095	RHOG	Rho-related GTP-binding protein RhoG	5	5.21874	5.48149	5.65858	5.70097	5.56225	5.18445	5.52106	5.4275	6.09685	5.57837	5.68177	5.74349	5.7366	5.36926	5.62497	5.48728	5.58584	5.34053
Q9H3U1	UNC45A	Protein unc-45 homolog A	5	5.41857	5.71951	5.43685	5.49089	5.47164	5.53029	5.77107	5.33942	5.57352	5.50476	5.85111	5.57687	5.56139	5.22957	5.79475	5.29803	5.63191	5.79985
Q92508	PIEZO1	Piezo-type mechanosensitive ion channel component 1	5	5.39637	5.31073	5.9701	5.48604	5.26221	5.87179	5.37788	5.65111	5.63987	5.79773	5.48444	5.25086	5.86724	5.56502	5.56178	5.12225	5.75555	5.62903
Q8IWA4	MFN1	Mitofusin-1	5	5.64298	5.27532	5.4235	5.78069	5.73828	6.16747	5.44052	5.45714	5.30204	5.66807	5.32227	5.44975	5.83103	5.79892	5.2778	5.76448	5.1252	5.53455
Q9NVE7	PANK4	4'-phosphopantetheine phosphatase	5	5.27105	5.87944	5.33495	5.66415	5.80932	5.7412	5.25446	5.75232	5.23423	5.68968	5.33382	5.67741	5.55029	5.78164	5.45352	5.76501	5.17202	5.63548
Q6MZP7	LIN54	Protein lin-54 homolog	5	5.08471	4.79606	5.43813	5.71898	5.44533	5.51761	5.32494	5.30038	5.70799	5.89561	6.01857	5.97519	5.70526	5.4356	5.64115	5.65452	5.52925	5.81072
Q969R5	L3MBTL2	Lethal(3)malignant brain tumor-like protein 2	5	5.61612	5.25919	5.36049	5.76881	5.62051	5.24483	5.46652	5.70748	5.73223	5.75289	5.39179	5.50598	5.49242	5.23816	5.49119	5.54282	5.86511	5.94346
Q7Z3K3	POGZ	Pogo transposable element with ZNF domain	5	5.42943	5.5533	5.67077	5.63471	5.24062	5.64901	5.45632	5.76227	5.93893	5.53992	5.58366	5.72303	5.42155	5.65962	5.08096	5.53215	5.28565	5.83812
Q15654	TRIP6	Thyroid receptor-interacting protein 6	5	5.58965	5.43221	5.77719	5.87088	5.5863	5.36723	5.88584	5.30346	5.61578	5.56935	5.76044	5.55661	5.26836	5.3959	5.53344	5.36505	5.82906	5.29325
Q99567	NUP88	Nuclear pore complex protein Nup88	5	5.45589	5.31424	5.64347	5.44305	5.56143	5.43357	5.57524	5.40717	5.75485	5.07383	5.71367	5.46916	5.83454	5.4682	5.59653	5.60003	5.7453	5.90983
P49005	POLD2	DNA polymerase delta subunit 2	5	4.94214	5.81014	5.71784	5.31882	5.74908	5.63855	5.69109	4.68103	5.69111	5.9035	5.86724	6.03395	5.9334	5.85791	5.56346	5.62044	5.05782	4.92247
Q9H993	ARMT1	Damage-control phosphatase ARMT1	5	5.52138	5.61127	5.65624	5.7606	5.63172	5.63797	5.43581	5.60183	5.3777	5.44213	5.66092	5.51535	5.65926	5.35121	5.58542	5.46931	5.5857	5.49618
Q92930	RAB8B	Ras-related protein Rab-8B	5	5.67748	5.43636	5.7263	5.37323	5.75983	5.39429	5.64598	5.39414	5.85115	5.4189	5.70301	5.56725	5.43269	5.35458	5.75466	5.39874	5.7065	5.40492
Q9NYF8	BCLAF1	Bcl-2-associated transcription factor 1	5	5.56449	5.3271	5.13496	5.15163	5.38157	5.42749	5.36956	5.55991	5.71651	5.35724	5.63478	5.94715	5.82339	5.72825	5.69169	5.65474	5.92754	5.602
O95785	WIZ	Protein Wiz	5	5.86629	5.38892	6.03793	4.98345	5.11851	5.37023	5.66	6.20134	5.68755	5.45319	5.76877	5.70598	5.24892	4.90862	5.2277	5.88879	5.7672	5.71659
P26583	HMGB2	High mobility group protein B2	5	6.07535	5.96568	5.26326	5.46754	5.54301	5.76159	5.22026	6.31521	5.30446	5.53144	5.21183	5.59266	5.59872	5.62313	5.2443	5.6309	5.40646	5.2442
Q6P158	DHX57	Putative ATP-dependent RNA helicase DHX57	5	5.87807	5.76084	5.43296	5.85164	5.50935	5.40363	5.62452	6.02745	5.40349	5.4789	5.13384	5.27689	5.3999	5.62432	5.21089	5.86653	5.45264	5.66413
Q8WXF1	PSPC1	Paraspeckle component 1	5	5.14873	5.24277	5.42607	5.33591	5.61101	5.42163	5.91613	5.21393	5.82392	5.51584	5.67409	5.54626	5.5672	5.47402	5.67859	5.5852	5.70723	6.11147
Q96I51	RCC1L	RCC1-like G exchanging factor-like protein	5	5.60481	5.80465	5.40865	5.68423	5.65941	5.55134	5.55977	5.49204	5.79487	5.77211	5.52919	5.13389	5.82889	5.67584	5.55036	5.42388	4.96405	5.56202
Q9GZT3	SLIRP	SRA stem-loop-interacting RNA-binding protein, mitochondrial	5	5.17209	5.54424	5.56727	5.54268	5.72385	5.69452	5.61166	5.83211	5.56055	5.37398	5.49909	5.35049	5.79373	5.45467	5.73934	5.38744	5.29713	5.85516
O75794	CDC123	Cell division cycle protein 123 homolog	5	5.6544	5.66771	5.56056	5.39368	5.43297	5.39388	5.4241	5.41096	5.5523	5.61482	5.74252	5.6582	5.70827	5.6139	5.66804	5.57316	5.56704	5.36349
Q96SI9	STRBP	Spermatid perinuclear RNA-binding protein	5	5.39261	5.622	5.45146	5.59663	5.92159	5.53984	5.74103	5.73899	5.40414	5.48444	5.63875	5.36031	5.51058	5.65564	5.5848	5.29315	5.51761	5.54643
O95834-3	EML2	Isoform 3 of Echinoderm microtubule-associated protein-like 2	5	5.23708	5.59564	5.60608	5.75779	5.58555	5.75416	5.52391	5.7177	5.21844	5.53972	5.81297	5.71067	5.61221	5.31169	5.48771	5.32025	5.37136	5.83708
Q9BSC4	NOL10	Nucleolar protein 10	5	5.11696	5.35562	5.69081	5.7268	5.50263	5.5188	5.36373	5.50249	5.66051	5.66503	5.33789	5.69305	5.72123	5.554	5.45713	5.48645	5.66355	5.9833
O94927	HAUS5	HAUS augmin-like complex subunit 5	5	5.81992	5.47227	5.65389	5.78568	5.5297	5.6257	5.33322	5.41037	5.70886	5.62995	5.298	5.57753	5.69798	5.70305	5.41731	5.3605	5.36033	5.61574
P37268	FDFT1	Squalene synthase	5	5.46873	5.6999	5.42829	4.84967	5.48059	5.41927	5.70772	5.45879	5.83394	5.22017	5.50529	5.59633	6.1356	5.73243	5.86306	5.70992	5.3206	5.5697
Q9UMY4-1	SNX12	Isoform 1 of Sorting nexin-12	5	5.3374	5.35321	5.57183	5.67823	5.49445	5.71141	5.60446	5.35389	5.56916	5.68072	5.6955	5.77792	5.56612	5.5415	5.57412	5.43584	5.61774	5.43649
Q9H1A4	ANAPC1	Anaphase-promoting complex subunit 1	5	6.15458	5.56634	5.65201	5.4152	5.55276	5.2178	5.64907	5.96023	5.30251	5.53137	5.36339	5.3879	5.52638	5.38707	5.28341	5.80711	5.72681	5.51605
Q9Y2K6	USP20	Ubiquitin carboxyl-terminal hydrolase 20	5	5.87084	5.60819	5.56863	5.70055	5.59809	5.76453	5.52169	5.76083	5.47243	5.49173	5.36755	5.53052	5.48662	5.58007	5.50988	5.39854	5.45084	5.31847
Q9Y4E5	ZNF451	E3 SUMO-protein ligase ZNF451	5	4.81745	5.6844	5.59684	5.54268	5.52057	5.51551	5.47718	5.64557	5.58954	5.65302	5.16109	5.65458	5.3923	5.48939	5.35831	5.65771	6.00117	6.24271
Q5JTV8-3	TOR1AIP1	Isoform 3 of Torsin-1A-interacting protein 1	5	5.91313	6.14971	4.93439	5.58528	5.60082	5.78826	5.1291	5.50368	5.46261	5.54297	5.46241	5.72917	5.17292	5.62738	5.5912	5.86855	5.38271	5.55571
P10619	CTSA	Lysosomal protective protein	5	5.08027	5.91383	5.13009	5.50242	5.63442	5.56366	5.58975	5.35731	5.53367	5.46584	5.20991	5.88903	6.00227	5.59172	5.46397	5.99788	5.45648	5.61749
P62280	RPS11	40S ribosomal protein S11	5	5.37484	5.49252	5.5048	5.56847	5.74732	5.79616	5.40468	5.43678	5.24471	5.61669	5.5684	5.68765	5.60385	5.57943	5.84787	5.5643	5.47365	5.48787
Q9BTT0-3	ANP32E	Isoform 3 of Acidic leucine-rich nuclear phosphoprotein 32 family member E	5	4.87936	5.64608	5.64093	5.34409	5.81609	5.42524	5.57783	5.27639	5.45118	5.46461	5.63234	5.68452	5.50988	5.86151	5.65731	5.84912	5.7337	5.54981
P27986-4	PIK3R1	Isoform 4 of Phosphatidylinositol 3-kinase regulatory subunit alpha	5	5.63358	5.48413	5.40752	5.50563	5.79148	5.41311	5.29654	5.80243	5.58444	5.33939	5.66001	5.51969	5.77207	5.50497	5.68231	5.56227	5.49663	5.54379
Q9UN36	NDRG2	Protein NDRG2	5	5.75258	5.24249	5.52063	5.72414	5.73241	5.43837	5.49179	5.85073	5.92606	5.37046	5.58313	5.49614	5.49539	5.07262	5.38747	5.38376	5.73717	5.79466
Q03252	LMNB2	Lamin-B2	5	5.7921	5.69074	5.74367	5.38738	5.31282	5.4648	5.49545	5.55211	5.58242	5.46335	5.36323	5.5349	5.22878	5.51731	5.8405	5.32776	5.74974	5.95294
P17812	CTPS1	CTP synthase 1	5	5.43059	5.52078	5.84568	5.803	5.50434	5.41909	5.74068	5.47299	5.18422	5.55598	5.51881	5.60432	5.70041	5.4449	5.45413	5.8078	5.45368	5.53858
P36551	CPOX	Oxygen-dependent coproporphyrinogen-III oxidase, mitochondrial	5	6.12644	5.85432	6.05356	6.17283	6.12012	5.57582	6.47484	3.06325	6.5236	5.92082	6.08919	5.94372	6.11013	5.91772	6.3501	4.91821	3.53962	3.24571
Q96DI7	SNRNP40	U5 small nuclear ribonucleoprotein 40 kDa protein	5	5.28321	6.02485	5.53901	5.42887	5.64895	5.30067	5.3663	5.30851	5.71091	5.70114	5.58086	5.68838	5.51627	6.0557	5.23045	5.49737	5.44388	5.67467
Q13535	ATR	Serine/threonine-protein kinase ATR	5	5.4585	5.56558	5.31546	5.59752	5.39077	5.5602	5.49138	5.50127	5.58777	5.60532	5.58237	5.6965	5.57362	5.5086	5.63955	5.42024	5.76828	5.73707
P31689	DNAJA1	DnaJ homolog subfamily A member 1	5	5.86481	5.49236	5.28013	5.7057	5.89262	5.33949	5.57817	5.66455	5.81983	5.40976	5.30004	5.44655	5.5513	5.60347	5.54089	5.64153	5.30354	5.56524
Q8N201	INTS1	Integrator complex subunit 1	5	5.08454	5.47161	5.79365	5.89504	5.34683	5.49277	5.37875	5.37777	5.73832	5.8726	5.64992	5.48643	5.51931	5.49335	5.42659	5.75238	5.36943	5.85071
Q6XQN6-2	NAPRT	Isoform 2 of Nicotinate phosphoribosyltransferase	5	5.94561	5.22426	5.48665	5.49335	5.69079	5.34298	4.91307	5.69945	5.65626	5.33932	5.51971	5.57597	5.61519	5.92971	5.67539	5.78081	5.65557	5.45591
P20020-1	ATP2B1	Isoform D of Plasma membrane calcium-transporting ATPase 1	5	5.98406	5.46055	5.64962	5.20146	5.74206	5.46431	5.97913	5.67818	5.91108	5.09469	5.69411	5.44202	5.38254	5.14437	5.5085	5.39333	5.77348	5.4965
O15550	KDM6A	Lysine-specific demethylase 6A	5	5.3794	5.53359	5.47748	5.59852	5.24887	5.46011	5.51329	5.21413	5.72287	5.3049	5.56446	5.80095	5.48141	5.64761	5.95392	5.39761	5.50367	6.19722
Q6UX04	CWC27	Spliceosome-associated protein CWC27 homolog	5	5.12957	5.82924	5.95654	5.55066	5.07448	5.29571	5.79555	5.33609	5.52468	5.79467	5.6295	5.64101	5.45157	5.45274	5.47411	5.88142	5.42899	5.75348
Q8WVX9	FAR1	Fatty acyl-CoA reductase 1	5	5.53212	5.29951	5.72041	5.80989	5.06362	5.51972	5.48698	5.19068	5.69711	5.24872	5.78847	5.64438	5.90811	5.37731	5.57319	5.6145	5.76925	5.75603
Q9BXL5	HEMGN	Hemogen	5	5.84919	5.55835	5.73395	5.30208	5.97824	5.73946	5.84755	5.92118	5.48202	5.30851	5.11358	5.05626	5.82404	5.51171	5.82127	5.43238	5.31045	5.20977
Q01804	OTUD4	OTU domain-containing protein 4	5	5.22031	5.67904	5.45945	5.69227	5.45781	6.05036	5.58702	5.63785	5.56576	5.73591	5.40424	5.46026	5.34287	5.60917	5.38104	5.70737	5.44661	5.56267
O75832	PSMD10	26S proteasome non-ATPase regulatory subunit 10	5	5.70143	5.64472	5.50629	5.67922	5.43422	5.538	5.43049	5.46539	5.60175	5.33295	5.56596	5.63394	5.76783	5.3866	5.49268	5.70457	5.49716	5.61683
P46934-4	NEDD4	Isoform 4 of E3 ubiquitin-protein ligase NEDD4	5	5.6064	5.68038	5.338	5.15068	5.32632	5.34358	5.6986	5.47166	5.73267	5.36599	5.69041	5.76164	5.92421	5.16263	5.3597	5.40296	6.15811	5.82605
Q9Y512	SAMM50	Sorting and assembly machinery component 50 homolog	5	5.43412	5.711	5.466	5.65757	5.62411	5.61	5.71934	5.90841	5.55241	5.54662	5.47207	5.32078	5.61185	5.42637	5.69813	5.5498	5.32927	5.36215
P63208	SKP1	S-phase kinase-associated protein 1	5	5.04623	5.46096	5.46687	5.42891	5.41124	5.64922	5.65986	5.75198	5.31388	5.37323	5.43123	5.50002	5.68338	5.76892	5.7697	5.74983	5.44067	6.09386
P20042	EIF2S2	Eukaryotic translation initiation factor 2 subunit 2	5	5.90498	5.3825	5.57167	5.34339	5.72734	5.41631	5.70041	5.58516	5.77898	5.47741	5.54756	5.17305	5.76488	5.31022	5.65686	5.41578	5.85315	5.39035
P27797	CALR	Calreticulin	5	5.23431	5.41658	5.6273	5.59079	5.98835	5.55035	5.71048	5.25331	5.6277	5.54536	5.41952	5.29428	5.74355	5.24719	5.88577	5.61825	5.46798	5.77894
Q9BVS4	RIOK2	Serine/threonine-protein kinase RIO2	5	5.5774	5.41764	5.94849	5.57913	5.31877	5.6685	5.74174	5.34422	5.72064	5.53239	5.50002	5.2247	5.33399	5.40505	5.56615	5.53328	5.66473	5.92314
Q15554	TERF2	Telomeric repeat-binding factor 2	5	5.71757	5.67172	5.4929	5.52375	5.4423	5.44354	5.69529	5.98272	5.17254	5.39451	5.38673	5.38832	5.43927	5.73245	5.60722	5.70964	5.52779	5.67174
P23284	PPIB	Peptidyl-prolyl cis-trans isomerase B	5	5.6205	5.40554	5.28433	5.46854	5.62717	5.67684	5.60014	5.72797	5.70919	5.54833	5.37545	5.52755	5.60096	5.79505	5.45902	5.51231	5.46037	5.60074
Q96HC4	PDLIM5	PDZ and LIM domain protein 5	5	5.43693	5.48034	5.83025	5.81121	5.6291	5.78576	5.4434	5.10926	5.54765	5.60086	5.66035	5.56632	5.8974	5.72853	5.36144	5.72115	5.06319	5.32687
Q96G46	DUS3L	tRNA-dihydrouridine(47) synthase [NAD(P)(+)]-like	5	5.42726	5.23436	5.64657	5.79749	5.22643	5.48136	5.45262	5.65917	5.67447	5.07003	5.525	5.77274	5.43586	5.72497	5.79734	6.06102	5.53094	5.48239
Q9UQE7	SMC3	Structural maintenance of chromosomes protein 3	5	5.56438	5.61627	5.69247	5.482	5.30986	5.01068	5.63553	5.82318	5.8301	5.41388	5.58259	5.85966	5.747	5.20657	5.45636	5.4692	5.7153	5.58498
Q9H3C7	GGNBP2	Gametogenetin-binding protein 2	5	4.81159	5.47965	5.41979	5.68678	5.84424	5.30192	5.28968	5.55878	5.22742	5.97521	5.1735	5.78661	5.65969	5.7564	5.98318	6.04271	5.24758	5.75528
Q15397	PUM3	Pumilio homolog 3	5	5.81946	5.69735	5.3227	5.43206	5.38002	5.66216	5.53447	5.75046	5.79245	5.74248	5.46817	5.45537	5.71709	5.29895	5.48373	5.30787	5.63821	5.49699
Q9NW15	ANO10	Anoctamin-10	5	5.58853	5.48727	5.65939	5.72291	5.51528	5.95858	5.38661	5.67351	5.45079	5.44551	5.85599	5.50141	5.2621	5.64583	5.7145	5.42822	5.40703	5.29654
Q9H223	EHD4	EH domain-containing protein 4	5	5.59096	5.80881	5.7204	5.45491	5.65607	5.53783	5.74252	5.47373	5.78783	5.55745	5.53353	5.5559	5.54932	5.55363	5.49295	5.50818	5.10826	5.36772
P53350	PLK1	Serine/threonine-protein kinase PLK1	5	5.85822	5.59787	5.78044	5.47239	5.37077	5.70085	5.66548	5.63308	5.49249	5.44934	5.48731	5.5101	5.50561	5.32784	5.07862	5.53862	5.87746	5.65351
P78371	CCT2	T-complex protein 1 subunit beta	5	9.12141	5.49979	4.7809	4.98116	5.96544	5.86182	4.64927	4.93806	4.84057	5.53954	7.19602	6.29573	4.90355	5.24394	4.54838	4.44358	7.28956	3.90128
Q12968	NFATC3	Nuclear factor of activated T-cells, cytoplasmic 3	5	5.26464	5.28513	5.59634	5.64198	5.74124	5.22527	5.67606	5.49316	5.33018	5.43394	5.74944	5.47919	5.71828	5.72284	5.61648	5.85768	5.43625	5.73187
Q13564-4	NAE1	Isoform 4 of NEDD8-activating enzyme E1 regulatory subunit	5	6.08316	5.41078	5.51574	5.45365	5.66218	5.17526	5.39476	5.56427	5.60005	5.32413	5.73719	5.40812	5.64047	5.29809	5.59846	5.70029	5.74846	5.68495
Q16774-2	GUK1	Isoform 2 of Guanylate kinase	5	5.42764	5.66898	5.58695	5.52276	6.08704	5.78432	5.5576	5.39964	5.25643	6.00465	5.3588	5.66425	5.52966	5.48155	5.62357	5.4729	5.29002	5.28324
O00214-2	LGALS8	Isoform 2 of Galectin-8	5	5.78153	5.4424	5.48075	5.38609	5.86164	5.66397	5.55761	5.53702	5.59239	5.68281	5.46232	5.49049	5.49542	5.64685	5.69221	5.36988	5.44872	5.40789
O60664	PLIN3	Perilipin-3	5	5.66377	5.15499	5.8293	5.1901	5.56904	5.51409	5.66474	5.24003	5.86868	5.54685	5.80332	5.46511	5.69774	5.38035	5.65708	5.38935	5.82017	5.54528
O14841	OPLAH	5-oxoprolinase	5	6.07157	5.54104	5.45356	5.71822	5.31838	5.68843	5.2543	5.86381	5.57506	5.29036	5.48675	5.65178	5.20589	5.66355	5.57088	5.3849	5.7609	5.50061
Q68CP9	ARID2	AT-rich interactive domain-containing protein 2	5	5.85524	5.68134	5.14285	5.37353	5.39536	5.62176	5.23973	5.52051	5.15265	5.65939	5.73152	5.55931	5.38818	5.79121	5.51734	5.83939	5.61737	5.91333
Q13619	CUL4A	Cullin-4A	5	5.48085	5.78379	5.43872	5.44593	5.75321	5.45704	5.57175	5.76469	5.72577	5.39937	5.57382	5.65758	5.5497	5.4349	5.47656	5.16077	5.77832	5.54725
Q99714	HSD17B10	3-hydroxyacyl-CoA dehydrogenase type-2	5	5.40121	6.02605	5.97896	5.43855	5.67482	5.25906	5.58376	5.37826	5.49019	5.72656	5.52669	5.69163	5.22543	5.40542	5.48434	5.55235	5.61379	5.54292
O94822-3	LTN1	Isoform 3 of E3 ubiquitin-protein ligase listerin	5	5.45739	5.32046	5.54348	5.60633	5.4454	5.42993	5.34096	5.48604	5.58901	5.78642	5.76271	5.70985	5.63348	5.46221	5.49343	5.74557	5.65259	5.53472
Q9H2K8	TAOK3	Serine/threonine-protein kinase TAO3	5	5.54263	5.54884	5.52344	5.69764	5.33358	5.49531	5.54442	5.47532	5.43673	5.74414	5.48736	5.63294	5.66326	5.65545	5.43594	5.59838	5.49533	5.68928
Q15555	MAPRE2	Microtubule-associated protein RP/EB family member 2	5	5.51132	5.85802	5.5399	5.80951	5.21827	5.38346	5.52346	5.64423	5.45503	5.5661	5.40475	5.79445	5.15274	5.45598	5.53548	5.77303	5.65046	5.72381
Q9ULK4	MED23	Mediator of RNA polymerase II transcription subunit 23	5	5.58126	5.41947	5.44767	5.3258	5.56254	5.55811	5.46482	5.75419	5.77145	5.13979	5.49853	5.79872	5.79834	5.54668	5.87968	5.20702	5.69471	5.5512
O60763-2	USO1	Isoform 2 of General vesicular transport factor p115	5	5.67812	5.61168	5.57157	5.65309	5.44202	5.52677	5.69436	5.50891	5.54673	5.49985	5.48807	5.49589	5.49517	5.35335	5.75738	5.62381	5.44161	5.61163
O60318	MCM3AP	Germinal-center associated nuclear protein	5	5.68961	5.45179	5.49247	5.7405	5.48786	5.60391	5.61676	5.30617	5.61295	5.58446	5.5936	5.70917	5.72968	5.64961	5.46287	5.58681	5.38236	5.2994
O15117-3	FYB1	Isoform 3 of FYN-binding protein 1	5	5.17304	5.52052	5.78635	5.86444	5.63495	5.0282	5.68171	5.2106	5.2857	5.5752	6.05244	5.67974	5.62373	5.83418	5.54516	5.73215	5.21889	5.55301
Q92560	BAP1	Ubiquitin carboxyl-terminal hydrolase BAP1	5	5.44074	5.20693	5.69028	5.46005	5.6321	5.53699	5.77121	5.52582	5.52474	5.48724	5.77458	5.47838	5.45199	5.22443	5.50281	5.46193	5.87839	5.95139
P30048	PRDX3	Thioredoxin-dependent peroxide reductase, mitochondrial	5	5.16345	5.70125	5.50787	5.65601	5.39725	5.7081	5.68204	5.90098	5.47143	5.73362	5.2316	5.46321	5.44064	5.80275	5.47529	5.64261	5.26507	5.75683
P52597	HNRNPF	Heterogeneous nuclear ribonucleoprotein F	5	5.73	5.64271	6.0147	5.3638	5.74164	5.59053	5.62506	5.55104	5.53308	5.27181	5.53649	5.3828	5.72541	5.29187	5.70073	5.41759	5.45047	5.43029
Q49A26	GLYR1	Putative oxidoreductase GLYR1	5	5.73272	5.65193	5.68087	5.28013	5.63568	5.51396	5.50034	5.23378	5.99999	5.74874	5.58129	5.56937	5.09014	5.44257	5.17575	5.42635	5.83002	5.90637
P13984	GTF2F2	General transcription factor IIF subunit 2	5	5.73132	5.50892	5.58331	5.59948	5.84897	5.49708	5.76179	5.49366	5.12439	5.66227	6.03764	5.08264	5.91243	5.50768	5.15505	5.76769	5.38818	5.33751
Q9NQT5	EXOSC3	Exosome complex component RRP40	5	5.31308	5.32292	5.37872	5.63368	5.27265	5.67264	5.996	5.76277	5.68312	5.37687	5.372	5.51362	5.4152	5.52263	5.77595	5.37756	5.62271	5.98788
Q7Z333-4	SETX	Isoform 4 of Probable helicase senataxin	5	5.70526	5.77462	5.7361	5.33886	5.55785	5.5684	5.67161	5.4478	5.35672	5.74342	5.44944	5.1554	5.63403	5.29168	5.67842	5.57885	5.63891	5.67264
Q15643	TRIP11	Thyroid receptor-interacting protein 11	5	5.5087	5.62775	5.7791	5.36292	5.73606	5.45764	5.65502	5.84931	5.67133	5.10958	5.55668	5.12627	5.68295	5.18121	5.83502	5.53748	5.57603	5.74695
Q9P2H3-3	IFT80	Isoform IFT80-L of Intraflagellar transport protein 80 homolog	5	5.53419	5.38368	5.57517	5.64999	5.40347	5.60043	5.42003	5.22724	5.48073	5.90688	5.48838	5.55806	5.84758	5.50868	5.76513	5.31264	5.48883	5.84889
P53701	HCCS	Holocytochrome c-type synthase	5	5.77261	5.86583	5.79859	5.25138	5.45988	5.71391	5.31194	5.90707	5.42023	5.3235	5.29834	5.40841	5.70172	5.52495	5.32214	5.79587	5.71292	5.41071
Q9H3S7	PTPN23	Tyrosine-protein phosphatase non-receptor type 23	5	5.7846	5.331	5.71163	5.39051	5.57526	5.4483	5.93223	5.21172	5.76502	5.51261	5.81821	5.32602	5.70441	5.50909	5.755	5.37948	5.54671	5.29819
Q15404	RSU1	Ras suppressor protein 1	5	4.93229	5.86719	5.07609	5.45123	5.3756	5.7263	5.45933	5.86802	5.21476	5.5736	5.32992	5.77762	5.61053	6.11152	5.43921	5.96424	5.42278	5.79977
Q9UKD2	MRTO4	mRNA turnover protein 4 homolog	5	5.81175	5.4364	5.66268	5.69007	5.73867	5.45413	5.30703	5.09002	5.77329	5.2385	5.53674	5.58182	5.77836	5.34632	5.92292	5.35326	5.68301	5.59502
Q13561-2	DCTN2	Isoform 2 of Dynactin subunit 2	5	5.76398	5.41322	5.59415	5.49715	5.53877	5.26729	5.36719	5.6033	5.50575	5.43421	5.78355	5.40769	5.59915	5.57626	5.46043	5.87883	5.88163	5.42747
Q8TEU7-4	RAPGEF6	Isoform 4 of Rap guanine nucleotide exchange factor 6	5	5.64199	5.17534	5.71183	5.54992	5.62154	5.46919	5.56703	5.56042	5.62084	5.43505	5.64629	5.79588	5.62932	5.27908	5.46613	5.58616	5.69129	5.55269
Q969V3	NCLN	Nicalin	5	5.74963	5.4419	5.21454	5.55691	5.79647	5.38075	5.5823	5.69312	5.66313	5.63624	5.48293	5.37908	5.81602	5.47832	5.59373	5.47793	5.43887	5.61813
Q5VWN6	TASOR2	Protein TASOR 2	5	5.4903	5.63721	6.31503	5.8227	5.3804	5.65113	6.01726	5.56168	5.3756	5.08648	5.66393	5.0564	5.2438	5.05344	5.35386	5.29882	6.17293	5.81903
Q86Y07	VRK2	Serine/threonine-protein kinase VRK2	5	5.80765	5.28289	5.64897	5.40917	5.53902	5.28327	5.53447	5.29011	5.88245	5.57143	5.84154	5.72314	5.5874	5.19474	5.48993	5.34981	5.98117	5.58284
Q9UNY4	TTF2	Transcription termination factor 2	5	5.62907	5.45357	5.32935	5.70689	5.52219	5.33734	5.23167	5.5505	5.26476	5.74919	5.60609	5.85753	5.52479	5.50527	5.6392	5.63065	5.58319	5.87876
Q9UGP8	SEC63	Translocation protein SEC63 homolog	5	5.64441	5.54977	6.0412	5.4613	5.2074	5.64207	5.77391	5.35795	6.06181	5.42898	5.76591	5.64815	5.45084	5.36524	5.21316	5.65095	5.56881	5.16813
Q96RS6	NUDCD1	NudC domain-containing protein 1	5	5.95154	5.55246	5.60821	5.81644	5.86882	5.03598	5.67047	5.86608	5.39364	5.51362	5.78804	5.42175	5.25543	5.40742	5.93068	5.28778	5.22436	5.40728
Q07666	KHDRBS1	KH domain-containing, RNA-binding, signal transduction-associated protein 1	5	5.38411	5.75723	5.55791	5.50992	5.39612	5.32226	5.7089	5.33379	5.57146	5.6153	5.80061	5.36335	5.63689	5.6559	5.64034	5.45864	5.7903	5.49697
Q15459	SF3A1	Splicing factor 3A subunit 1	5	5.52635	5.34212	5.54408	5.69259	5.64221	6.03575	5.63423	5.40075	5.88965	5.67918	5.45168	5.43324	4.94658	5.35432	5.5751	6.0451	5.62232	5.18474
Q15291	RBBP5	Retinoblastoma-binding protein 5	5	6.14807	6.40847	6.14808	4.99709	4.46248	4.2254	6.28205	5.82395	6.02452	6.22764	6.09051	6.09268	4.1909	4.22278	4.53912	5.71594	6.00097	6.39936
Q9Y5Q8-3	GTF3C5	Isoform 3 of General transcription factor 3C polypeptide 5	5	5.52505	5.56379	5.42229	5.58936	5.42123	5.59577	5.38994	5.71239	5.6087	5.60144	5.59567	5.58319	5.64427	5.68057	5.40955	5.60221	5.62081	5.43374
P61224	RAP1B	Ras-related protein Rap-1b	5	5.65387	5.45727	5.65085	5.25331	5.62039	5.50476	5.91285	5.27296	5.78921	5.45644	5.67837	5.42271	5.47503	5.26719	5.64079	5.25269	6.08455	5.60678
P55201	BRPF1	Peregrin	5	5.46334	5.72786	5.84281	5.30629	5.33697	5.66835	5.43606	5.66732	5.73053	5.60807	5.53877	5.61209	5.29209	5.65094	5.20531	5.68373	5.6456	5.58386
Q8TCS8	PNPT1	Polyribonucleotide nucleotidyltransferase 1, mitochondrial	5	5.50354	5.85382	5.67841	5.31517	5.76087	5.79608	5.4494	5.48466	5.46135	5.98302	5.59986	5.51858	5.15636	5.57053	5.42376	5.52796	5.71355	5.20308
Q9UPN9	TRIM33	E3 ubiquitin-protein ligase TRIM33	5	5.58698	5.3402	5.39708	5.57592	5.54188	5.35075	5.39716	5.70414	5.77371	5.31734	6.02602	5.36322	5.51622	5.59294	5.75809	5.40834	5.91233	5.43769
Q14CX7	NAA25	N-alpha-acetyltransferase 25, NatB auxiliary subunit	5	5.78949	5.86138	5.49178	5.59428	5.90406	5.88852	5.67366	5.82705	5.47589	5.46691	5.13596	5.5066	5.49044	5.63347	5.20026	5.40461	5.08997	5.56566
P16152	CBR1	Carbonyl reductase [NADPH] 1	5	5.45814	5.6134	5.62741	5.50443	5.36727	5.56417	5.73152	5.36022	5.80468	5.34906	5.51899	5.42662	5.43341	5.5685	5.82352	5.65158	5.73428	5.4628
Q15814	TBCC	Tubulin-specific chaperone C	5	5.68955	5.50265	5.88651	5.79704	5.44779	5.49387	5.87982	4.77434	5.91163	5.82765	5.76285	5.88127	5.547	5.35237	5.67334	5.31928	5.32334	4.9297
Q86SF2	GALNT7	N-acetylgalactosaminyltransferase 7	5	5.59993	5.43136	5.14436	5.56902	5.68229	5.90581	5.43495	5.5037	5.46906	5.73748	5.49523	5.68976	5.55219	5.67335	5.33678	5.69613	5.45224	5.62638
P57678	GEMIN4	Gem-associated protein 4	5	5.58123	5.21483	5.60493	5.45812	5.49469	5.61904	6.06135	5.46631	5.71167	5.53448	5.28571	6.07336	5.46115	5.46211	5.5398	5.53646	5.4309	5.46388
P11216	PYGB	Glycogen phosphorylase, brain form	5	5.49559	5.44361	6.026	5.70749	5.20139	5.34601	5.54531	5.43807	5.75271	5.19119	5.59329	5.25883	5.57554	5.54721	5.61627	5.43454	5.77179	6.05516
Q8N1G2	CMTR1	Cap-specific mRNA (nucleoside-2'-O-)-methyltransferase 1	5	5.64935	5.55767	5.58415	5.32299	5.34998	6.01385	5.46266	5.38417	5.59177	5.19538	5.70344	5.69971	5.58329	5.48145	5.50244	5.79264	5.44391	5.68114
O75083	WDR1	WD repeat-containing protein 1	5	5.72502	5.51967	5.3777	5.10017	5.69502	5.26537	5.77826	5.49512	5.31423	5.61102	5.61215	5.63564	5.57277	5.64267	5.71324	5.35264	6.03831	5.55101
P52294	KPNA1	Importin subunit alpha-5	5	5.61406	5.50715	6.1675	5.74956	5.29081	5.35842	5.92414	5.35073	5.48227	5.60675	5.69208	5.29923	5.46455	5.44045	5.48745	5.09131	6.02922	5.44434
Q8N1B4	VPS52	Vacuolar protein sorting-associated protein 52 homolog	5	5.62238	5.92256	5.89731	5.64525	5.35166	5.36578	5.64543	5.72674	5.40521	5.52938	5.39095	5.54841	5.21526	5.41061	5.43857	5.59069	5.69093	5.60287
Q99575	POP1	Ribonucleases P/MRP protein subunit POP1	5	5.96942	5.47677	5.65599	5.41531	5.64075	5.71987	5.26162	5.35414	5.66164	5.52445	5.61456	5.56669	5.44776	5.47718	5.71781	5.46982	5.55187	5.47435
O15440	ABCC5	Multidrug resistance-associated protein 5	5	5.55148	5.69531	5.601	5.17116	5.56509	5.69109	5.8146	5.63637	5.72457	5.62405	5.61984	5.67239	5.5878	5.29524	5.57717	5.15436	5.68374	5.33474
P46100-4	ATRX	Isoform 3 of Transcriptional regulator ATRX	5	5.71777	5.65071	5.60892	5.42421	5.1367	5.0507	5.63849	5.90852	5.70719	5.46401	5.88861	5.40574	5.34801	5.17981	5.325	5.80524	5.89267	5.8477
Q92552-2	MRPS27	Isoform 2 of 28S ribosomal protein S27, mitochondrial	5	5.52953	5.6777	5.38255	5.50637	5.50101	5.62156	5.49996	5.66256	5.67284	5.57658	5.40156	5.55344	5.63362	5.5926	5.60673	5.66484	5.48875	5.4278
Q86WA8	LONP2	Lon protease homolog 2, peroxisomal	5	5.49017	5.10867	5.64783	5.56331	5.33422	5.56154	5.67027	5.08527	5.56579	6.11523	5.67589	5.51736	5.67256	5.59079	5.77791	5.60597	5.52968	5.48754
Q9Y2S7	POLDIP2	Polymerase delta-interacting protein 2	5	5.93028	5.57444	5.59439	5.58853	5.53051	5.41548	5.40738	5.14949	5.40219	5.5849	5.71295	5.80697	5.32238	5.71536	5.66841	5.30248	5.70528	5.58858
Q15631	TSN	Translin	5	6.24376	5.39432	5.31086	5.08608	5.17063	5.89775	5.34061	5.77439	5.58464	5.72702	5.96707	5.5723	5.25489	5.54641	4.90632	4.78118	6.67788	5.7639
P46977	STT3A	Dolichyl-diphosphooligosaccharide--protein glycosyltransferase subunit STT3A	5	5.4512	5.3172	5.15771	5.65362	5.3959	5.69278	5.50986	5.63116	5.41165	5.85313	5.77766	5.63686	5.53479	5.72698	5.7373	5.66151	5.39361	5.45709
Q14318-2	FKBP8	Isoform 2 of Peptidyl-prolyl cis-trans isomerase FKBP8	5	5.55552	5.37471	5.56071	5.69454	5.53923	5.44123	5.24822	5.54158	5.43681	5.7947	5.85698	5.85836	5.46076	5.40373	5.57565	5.11298	5.71357	5.83074
Q2M3G4	SHROOM1	Protein Shroom1	5	5.31815	5.36052	5.72657	5.5912	5.32115	5.70612	5.60729	5.43666	5.60915	5.77156	5.67518	5.87704	5.33518	5.26497	5.41163	5.67399	5.7945	5.51912
P51798	CLCN7	H(+)/Cl(-) exchange transporter 7	5	5.43159	5.4588	5.62119	5.74924	5.28629	5.41438	5.51305	5.65178	5.13891	5.66821	6.05037	5.4353	5.2258	5.8269	5.44071	5.44739	5.68264	5.95747
Q96A72	MAGOHB	Protein mago nashi homolog 2	5	5.71129	5.36934	5.86125	5.35479	5.70093	5.51211	5.73024	5.51279	5.42269	5.4258	5.56645	5.20392	5.69655	5.44404	5.37908	5.65001	5.78157	5.67715
Q9C0C9	UBE2O	(E3-independent) E2 ubiquitin-conjugating enzyme	5	5.91719	5.41105	5.67874	5.52529	5.50212	5.53044	5.35637	5.5437	5.52333	5.47086	5.70126	5.60522	5.41752	5.51064	5.46459	5.47542	5.80505	5.5612
Q96EB1-2	ELP4	Isoform 2 of Elongator complex protein 4	5	5.35895	5.56768	5.22959	5.69711	5.33615	5.77622	5.09041	6.04299	5.32729	5.50969	5.32737	6.1042	5.64455	5.6665	5.43972	5.90245	5.10461	5.87452
Q8IU60	DCP2	m7GpppN-mRNA hydrolase	5	5.31571	5.9371	5.47642	5.15791	5.64783	5.61044	5.47401	5.42745	5.24324	5.628	5.25598	6.04289	5.27046	5.57343	5.6302	5.62755	5.88348	5.79792
Q9UKY7	CDV3	Protein CDV3 homolog	5	5.32621	5.71799	5.56268	5.47547	5.59761	5.50449	5.48804	5.77494	5.90473	5.29629	5.23318	5.48908	5.97436	5.80721	5.41847	5.59137	5.45624	5.38165
Q86UV5	USP48	Ubiquitin carboxyl-terminal hydrolase 48	5	5.55574	5.50465	5.21117	5.61692	5.6481	5.61914	5.41584	5.64115	5.43347	5.47805	5.39284	5.58886	5.57011	5.55206	5.57064	5.7145	5.59123	5.89554
Q14241	ELOA	Elongin-A	5	5.60882	5.86549	5.70712	5.55505	5.1865	5.50894	5.60785	5.49044	5.46039	6.10831	5.31614	5.70372	5.6795	5.34038	5.41432	5.47125	5.24489	5.73088
Q96JB3-2	HIC2	Isoform 2 of Hypermethylated in cancer 2 protein	5	5.35127	5.30743	5.5282	5.71413	5.75482	5.48291	4.98388	5.69101	5.27698	5.13663	5.6783	5.80581	5.59942	5.97812	5.66278	5.78415	5.34815	5.91602
Q9Y2X3	NOP58	Nucleolar protein 58	5	5.74819	6.04625	5.78996	5.02767	5.34034	5.18349	5.47875	5.50253	5.86399	5.5633	5.47457	5.68241	5.03111	4.93344	5.77001	6.13444	5.67292	5.75663
Q86W50	METTL16	RNA N6-adenosine-methyltransferase METTL16	5	5.34608	5.2266	5.41281	5.68828	5.47974	5.62429	5.60525	5.5963	5.80584	5.71323	5.39934	5.40025	5.66192	5.52987	5.78918	5.80655	5.51366	5.4008
Q9UGL1-2	KDM5B	Isoform 2 of Lysine-specific demethylase 5B	5	5.24109	5.30931	5.43889	5.52284	5.51809	5.35093	5.40817	5.45991	5.65055	5.59893	5.67422	5.63943	5.70797	5.71146	5.75524	5.57998	5.81835	5.61465
Q6P3X3	TTC27	Tetratricopeptide repeat protein 27	5	5.49119	5.74874	5.84542	5.58071	5.47741	5.32666	5.35386	6.2178	5.48884	5.44511	5.19818	5.95399	5.37401	5.60703	5.30731	5.76674	5.34899	5.468
P35269	GTF2F1	General transcription factor IIF subunit 1	5	5.7417	5.80039	5.59259	5.51045	5.28231	5.658	5.59133	5.3309	5.57081	5.34019	5.77996	5.11317	5.53285	5.58716	5.5908	5.61973	6.00421	5.35344
Q8WWC4	MAIP1	m-AAA protease-interacting protein 1, mitochondrial	5	5.67653	5.35141	5.56685	5.20267	5.67483	5.52792	5.83931	5.75619	5.33323	5.57445	5.66435	5.49017	5.20571	5.55189	5.13107	5.6419	6.25705	5.55445
Q9BV44	THUMPD3	THUMP domain-containing protein 3	5	5.40313	5.39641	5.69972	5.60731	5.44736	5.37537	5.70797	5.5085	5.32424	5.56078	5.80353	5.61487	5.67284	5.48397	5.676	5.29522	5.72357	5.69922
P12081	HARS1	Histidine--tRNA ligase, cytoplasmic	5	5.65002	5.35926	5.75862	5.39395	5.70271	5.25063	5.92647	5.22567	5.81952	5.56734	5.5222	5.2201	5.65066	5.43403	5.53166	5.4305	5.94516	5.61151
P48147	PREP	Prolyl endopeptidase	5	5.68737	5.16432	5.44684	5.50007	4.94067	5.37934	5.25172	5.80155	5.57355	5.65608	5.32637	5.7697	5.88041	5.50455	5.57541	5.44769	6.08309	6.01127
Q8IZL8	PELP1	Proline-, glutamic acid- and leucine-rich protein 1	5	5.95291	5.40559	5.56337	5.56266	5.59965	5.24256	5.79454	5.52949	5.52192	5.5539	5.77932	5.61977	5.20209	5.43359	5.22072	5.38738	5.75171	5.87882
P49006	MARCKSL1	MARCKS-related protein	5	5.22074	5.89608	5.92516	5.4063	5.62613	5.73397	5.39681	5.12948	5.79079	5.54355	5.52279	5.22896	5.82865	5.58549	5.04047	5.53156	6.13903	5.45404
Q9ULH0	KIDINS220	Kinase D-interacting substrate of 220 kDa	5	5.63785	5.46354	5.40802	5.3718	5.38223	5.50066	5.65352	5.62605	5.46623	5.44044	5.85354	5.30115	5.68065	5.31329	5.71667	5.6754	5.88913	5.61982
P30084	ECHS1	Enoyl-CoA hydratase, mitochondrial	5	5.47439	5.8072	5.39839	5.34776	5.97272	5.81993	5.82894	5.59568	5.48386	5.58357	5.24456	5.66881	5.63948	5.82554	5.49606	5.54697	5.12548	5.14065
Q96RQ3	MCCC1	Methylcrotonoyl-CoA carboxylase subunit alpha, mitochondrial	5	5.65606	5.36679	6.16423	5.61618	5.69423	5.14517	5.65572	5.89274	5.74909	5.39933	5.39727	5.04758	5.90651	5.55023	5.5047	5.44842	5.3846	5.42116
Q9H000	MKRN2	Probable E3 ubiquitin-protein ligase makorin-2	5	5.38291	5.3515	5.70122	5.24771	5.4962	5.45088	5.42064	5.67797	5.44212	5.72842	5.72523	5.60037	5.57211	5.70351	5.60097	5.29258	5.84044	5.76523
O95235	KIF20A	Kinesin-like protein KIF20A	5	5.58107	5.43163	5.71059	5.38491	5.64744	5.41151	5.60153	5.61666	5.49919	5.72802	5.67642	5.52451	5.40836	5.25719	5.68492	5.57568	5.51373	5.74664
Q13438	OS9	Protein OS-9	5	5.56559	5.92351	5.24905	5.8663	5.18694	5.36992	5.72745	5.41555	5.62306	5.13368	5.20814	6.01204	5.55202	5.07728	6.04148	5.55694	5.87836	5.61269
Q9NR31	SAR1A	GTP-binding protein SAR1a	5	5.41983	5.67245	5.67481	5.17798	5.72115	5.66474	5.7194	5.86897	5.583	5.26048	5.51253	5.42455	5.6185	5.59945	5.70853	5.6456	5.34566	5.38238
Q969U7	PSMG2	Proteasome assembly chaperone 2	5	5.53489	5.58004	5.8001	5.75058	5.7834	5.92954	5.43119	5.59035	5.65894	5.45008	5.41901	5.33752	5.57497	5.13795	5.59599	5.48044	5.47133	5.47367
Q9NPI1-2	BRD7	Isoform 2 of Bromodomain-containing protein 7	5	5.71958	5.39888	5.70168	5.54361	5.39714	5.72912	5.61019	5.69481	5.78441	5.53388	5.56216	5.63616	5.53814	5.2319	5.58186	5.67948	5.43359	5.2234
P36507	MAP2K2	Dual specificity mitogen-activated protein kinase kinase 2	5	5.4625	5.26175	5.5948	5.51379	5.62651	5.45597	5.59744	5.35424	5.54984	5.45649	5.38402	5.70835	5.73383	5.54604	5.49816	5.56472	5.66615	6.0254
Q14155-5	ARHGEF7	Isoform 5 of Rho guanine nucleotide exchange factor 7	5	5.27443	5.48342	5.66934	5.77373	5.69041	5.18016	5.77257	5.56098	5.52303	5.42452	5.67146	5.6131	5.52336	5.41061	5.7886	5.51139	5.7133	5.41559
Q6ZRQ5	MMS22L	Protein MMS22-like	5	5.12735	5.73716	5.786	5.723	5.42123	5.57216	5.30454	5.81896	5.65326	5.70879	5.54959	5.64147	5.51584	5.61782	5.33594	5.33863	5.43966	5.70861
Q96JH7	VCPIP1	Deubiquitinating protein VCPIP1	5	5.30877	5.52542	5.90398	5.50922	5.25465	5.57982	5.6475	5.92048	5.49826	5.43334	5.61273	5.34365	5.30921	5.63534	5.5242	5.64265	5.60324	5.74752
Q9NY93	DDX56	Probable ATP-dependent RNA helicase DDX56	5	5.49655	5.67504	5.44125	5.50218	5.63054	6.01959	5.59355	5.72877	5.4756	5.5109	5.42249	5.4903	5.35867	5.77455	5.57878	5.54908	5.25723	5.49493
Q9Y6E2	BZW2	Basic leucine zipper and W2 domain-containing protein 2	5	5.68993	5.48207	5.69318	5.60896	5.49026	5.45914	5.6771	5.59089	5.52899	5.70738	5.75224	5.47104	5.57097	5.58378	5.46781	5.50225	5.33072	5.3933
O43422	THAP12	52 kDa repressor of the inhibitor of the protein kinase	5	5.75564	5.73102	5.66805	5.89705	5.48125	5.49678	5.47755	5.66085	5.4148	5.31867	5.62382	5.64464	5.35825	5.47265	5.73289	5.34867	5.41719	5.50021
Q14667	KIAA0100	Protein KIAA0100	5	5.59842	5.24595	5.62254	5.21619	5.27172	5.49944	5.62257	5.79218	5.61133	5.64169	5.54593	5.68824	5.51138	5.55219	5.57126	5.52035	5.79481	5.6938
Q6NW29	RWDD4	RWD domain-containing protein 4	5	5.20825	5.31674	5.89958	5.50928	5.50322	5.3984	5.29967	5.5368	5.63197	5.49202	5.59639	5.54462	5.33966	5.36466	5.34601	5.5233	6.32673	6.16268
P26374	CHML	Rab proteins geranylgeranyltransferase component A 2	5	5.38339	5.57655	5.23235	5.49352	5.48271	5.4599	5.46711	5.78058	5.58104	5.52758	5.57135	5.52345	5.48739	5.56468	5.63353	5.55558	5.74225	5.93706
Q92688	ANP32B	Acidic leucine-rich nuclear phosphoprotein 32 family member B	5	5.26792	5.40916	5.95442	5.43786	5.45902	5.61749	5.47619	5.74179	5.65408	5.34296	5.54777	5.58625	5.25426	5.72369	5.42188	5.46779	5.89081	5.74665
P54886	ALDH18A1	Delta-1-pyrroline-5-carboxylate synthase	5	5.91281	5.37806	5.51838	5.6887	5.76062	5.85293	5.78216	5.71303	5.14952	5.6901	5.52807	5.85765	5.31243	5.30211	5.59416	5.57531	5.35325	5.0307
Q676U5	ATG16L1	Autophagy-related protein 16-1	5	5.28786	5.98459	5.46511	5.85234	5.30051	5.99381	5.50337	5.59689	5.33292	5.29466	5.60121	6.08023	5.27043	5.24935	5.42105	5.57915	5.42382	5.76272
Q9Y6Y8	SEC23IP	SEC23-interacting protein	5	5.61718	5.75083	5.51003	5.91526	5.17906	5.58547	5.46156	5.88106	5.51369	5.39223	5.36081	5.63323	5.51241	5.5672	5.63281	5.35182	5.5626	5.57276
A3KMH1	VWA8	von Willebrand factor A domain-containing protein 8	5	5.56271	5.1957	5.95858	5.65045	5.55692	5.47486	5.6737	5.5039	5.39701	5.54163	5.55789	5.39663	5.48236	5.34683	5.32532	5.31784	6.05167	6.00599
Q709C8	VPS13C	Vacuolar protein sorting-associated protein 13C	5	5.61179	5.81596	5.40614	5.6156	5.45728	5.76979	5.54368	5.72755	5.46396	5.34942	5.80393	5.53589	5.44791	5.49284	5.45347	5.35053	5.69057	5.46367
Q4LE39	ARID4B	AT-rich interactive domain-containing protein 4B	5	5.2275	5.44003	5.99859	5.80963	4.99661	5.41413	5.25665	5.12147	6.05814	5.69695	5.57268	5.51939	5.47632	5.32704	5.70058	5.65013	5.85976	5.8744
P11908-2	PRPS2	Isoform 2 of Ribose-phosphate pyrophosphokinase 2	5	5.47186	5.74181	5.6278	5.53363	5.3606	6.06842	5.25594	5.91001	4.93125	5.75659	5.64579	5.5067	5.79251	5.20264	5.48962	5.49967	5.56135	5.64382
Q9NX02	NLRP2	NACHT, LRR and PYD domains-containing protein 2	5	5.92794	5.70225	6.20098	5.7742	6.15796	6.01476	5.89764	6.12215	5.71209	5.48785	5.61611	5.50064	4.94416	5.10948	5.20305	4.80763	4.95079	4.8703
Q96ME7	ZNF512	Zinc finger protein 512	5	5.66454	5.78684	5.62114	5.60772	5.46655	5.39877	5.15153	5.67152	5.62369	5.38122	5.65942	5.8167	5.49138	5.34685	5.50177	5.59145	5.92304	5.29586
P21399	ACO1	Cytoplasmic aconitate hydratase	5	5.8751	5.5998	5.66337	5.57139	5.63376	5.86133	5.52279	6.00705	5.47177	5.28979	5.25937	5.68505	5.33871	5.44431	5.27961	5.67069	5.62064	5.20549
Q92889	ERCC4	DNA repair endonuclease XPF	5	6.0624	5.69427	5.48832	5.35295	5.46784	5.85411	5.32158	5.48295	6.19684	5.38397	5.36068	5.85565	5.43338	5.11901	5.17352	5.4403	5.63553	5.67669
Q8IZE3-2	SCYL3	Isoform 2 of Protein-associating with the carboxyl-terminal domain of ezrin	5	5.60619	5.09437	5.76041	5.49116	5.25302	5.85163	5.76197	5.75754	5.25644	5.46647	5.63492	5.71416	5.31301	5.44925	5.39838	5.49452	5.63795	6.05861
P06756	ITGAV	Integrin alpha-V	5	5.49638	5.78036	5.66361	5.58488	5.3664	5.86638	5.59952	5.68326	5.49169	5.34556	5.24407	5.46353	5.62481	5.55981	5.52535	5.58069	5.62233	5.50136
Q14004	CDK13	Cyclin-dependent kinase 13	5	5.84243	5.3911	5.58422	5.53838	5.5889	5.69039	5.86968	5.36498	5.22174	5.85743	5.93078	5.72589	5.27369	5.49307	5.09741	5.62988	5.32609	5.57396
Q8NBF6	AVL9	Late secretory pathway protein AVL9 homolog	5	5.78543	5.47524	5.61324	5.4527	5.61622	5.45251	5.51629	5.41946	5.6969	5.66953	5.24616	5.7056	5.39683	5.55836	5.5455	5.58442	5.66335	5.60224
O75439	PMPCB	Mitochondrial-processing peptidase subunit beta	5	5.28112	5.91847	5.63618	5.9051	5.66463	5.80484	4.87166	5.18113	5.48742	5.42617	5.80229	5.86045	4.84263	5.53281	5.87798	5.79406	5.63301	5.48003
P31751	AKT2	RAC-beta serine/threonine-protein kinase	5	5.87106	5.69719	5.48306	5.24506	5.65637	5.34015	5.8396	6.10176	5.82732	5.48996	5.1436	5.27878	5.36499	5.51049	5.36728	5.8428	5.58485	5.35567
O00418	EEF2K	Eukaryotic elongation factor 2 kinase	5	5.55614	5.10575	5.71117	5.78188	5.79386	5.74261	5.72555	5.35369	5.30269	5.75201	5.63457	5.62593	5.15592	5.50385	5.42579	5.65004	5.43407	5.74449
Q7L5Y9	MAEA	E3 ubiquitin-protein transferase MAEA	5	5.48997	5.28375	5.47199	5.42287	5.23347	5.33993	5.29918	5.58234	5.69424	5.70232	5.55507	5.70263	5.55869	5.83247	5.35311	5.91834	5.87333	5.68629
Q93034	CUL5	Cullin-5	5	5.58824	5.52235	5.31505	5.41768	5.63683	5.66468	5.62025	5.44387	5.80649	5.58739	5.42483	5.4255	5.8183	5.59326	5.39268	5.52973	5.95269	5.2602
Q96IV0	NGLY1	Peptide-N(4)-(N-acetyl-beta-glucosaminyl)asparagine amidase	5	5.3079	5.72413	5.31138	5.44656	5.62334	5.41579	5.42442	5.56648	5.65289	5.28522	6.01359	5.48229	5.64898	5.41453	5.53153	5.6046	5.76126	5.7851
Q9NRL2	BAZ1A	Bromodomain adjacent to zinc finger domain protein 1A	5	5.08001	5.28344	5.63685	5.60857	5.50336	5.11643	5.49663	5.56061	5.86596	6.01207	5.90689	5.77838	5.5992	5.77594	5.3705	5.61977	5.25516	5.53023
Q15208	STK38	Serine/threonine-protein kinase 38	5	5.71429	5.46134	5.42226	5.5835	5.5294	5.63711	5.3106	5.53049	5.64658	5.75911	5.30966	5.82224	5.65357	5.48599	5.36108	5.57602	5.52608	5.67069
Q86UK7-3	ZNF598	Isoform 3 of E3 ubiquitin-protein ligase ZNF598	5	5.77085	5.10804	5.5371	6.04918	5.51235	5.21604	5.43938	5.42502	5.43016	5.97205	5.88076	4.90976	5.54328	5.70527	5.28604	5.50495	5.73576	5.974
Q9Y375	NDUFAF1	Complex I intermediate-associated protein 30, mitochondrial	5	5.49098	5.76552	4.98665	5.73641	5.24634	5.83509	5.22727	5.76445	5.10111	5.68857	5.14804	5.9126	5.47984	5.98912	5.41945	6.16818	5.21758	5.82279
Q9C0C7-5	AMBRA1	Isoform 5 of Activating molecule in BECN1-regulated autophagy protein 1	5	5.8884	4.94486	5.42535	5.95738	5.26425	5.5094	5.74292	5.3931	5.41746	5.52308	5.37977	5.1348	5.65576	5.48638	5.97207	5.61586	5.69331	5.99585
O60524	NEMF	Nuclear export mediator factor NEMF	5	5.80302	5.9004	5.34775	5.52963	5.98599	5.37547	5.10462	5.67375	5.82284	5.61794	5.24153	5.67031	5.44492	5.70728	4.71809	5.78805	5.88993	5.37849
Q9BQQ3	GORASP1	Golgi reassembly-stacking protein 1	5	5.437	5.82172	5.42286	5.54439	5.73933	6.03491	5.18035	5.57836	5.84053	5.83507	5.36023	5.56343	5.54527	5.59779	5.24718	5.52129	5.30272	5.42755
Q9UFN0	NIPSNAP3A	Protein NipSnap homolog 3A	5	5.32781	5.24846	5.95485	5.72167	5.76441	4.88859	5.61277	5.69752	5.29368	5.39764	5.63771	5.43343	5.56063	5.54527	5.8029	5.66033	5.63827	5.81405
Q9H0E3-3	SAP130	Isoform 3 of Histone deacetylase complex subunit SAP130	5	5.70203	5.39049	5.65697	5.74065	5.12826	5.63118	5.71408	5.46967	5.54507	5.51541	5.55015	5.52071	5.55486	5.37904	5.45188	5.63964	5.64912	5.76079
Q16836-2	HADH	Isoform 2 of Hydroxyacyl-coenzyme A dehydrogenase, mitochondrial	5	5.57182	5.69337	5.69441	5.28472	5.3652	5.62075	5.62403	5.43441	5.40726	5.59114	5.42138	5.57455	5.68205	5.61892	5.71231	5.5862	5.61237	5.50511
Q9NR56	MBNL1	Muscleblind-like protein 1	5	5.62019	5.76461	5.7438	5.615	5.75493	5.75166	5.77081	5.14992	5.50977	5.50769	5.62138	5.25352	5.68666	5.65708	5.81959	5.51278	5.42599	4.83462
O00748-4	CES2	Isoform 3 of Cocaine esterase	5	5.64618	5.20721	5.61576	5.72634	5.52952	5.49641	5.60931	5.4868	6.04231	5.42827	5.85301	5.53	5.26086	5.21773	5.38159	5.68486	5.86504	5.41879
Q00013	MPP1	55 kDa erythrocyte membrane protein	5	4.98023	6.09073	6.45874	5.9649	6.19249	5.46738	6.15753	4.89779	5.10773	5.71749	5.85822	5.4893	5.46651	5.48719	4.9578	5.16367	5.15437	5.38793
Q9H2C0	GAN	Gigaxonin	5	5.70965	4.93425	5.78802	5.81802	5.41915	5.86534	5.525	5.48004	5.43592	5.75496	5.66069	5.77782	5.18957	5.42993	5.36917	5.96467	5.20626	5.67155
Q86XR7-2	TICAM2	Isoform 2 of TIR domain-containing adapter molecule 2	5	5.84509	5.72173	5.3665	5.27666	5.57548	5.76488	5.50592	5.68937	5.56181	5.5377	5.4767	5.46503	5.38271	5.51049	5.68425	5.51446	5.5721	5.54911
Q9Y2T2	AP3M1	AP-3 complex subunit mu-1	5	5.8274	5.34679	5.25248	5.69272	5.24726	5.30689	5.22975	5.80903	5.34668	5.84261	5.38327	5.53416	5.75388	5.82937	5.6723	5.54388	5.67092	5.71062
P28482	MAPK1	Mitogen-activated protein kinase 1	5	5.82181	5.59762	5.38224	5.48839	5.60497	5.74456	5.50062	5.4218	5.671	5.48045	5.68223	5.35003	5.48594	5.25665	5.57996	5.22663	6.10283	5.60226
Q8WVT3	TRAPPC12	Trafficking protein particle complex subunit 12	5	5.63181	5.56363	5.86966	5.3749	5.60839	5.36125	5.59463	5.64087	5.49317	5.72867	5.32662	5.76442	5.43083	5.39725	5.32483	5.37502	5.68524	5.82883
Q9UHD1	CHORDC1	Cysteine and histidine-rich domain-containing protein 1	5	4.77052	5.66967	5.83942	5.78479	5.40257	5.08448	5.53877	5.27509	5.42596	5.48656	6.08697	5.46556	5.56006	6.61908	5.68633	5.22614	5.40028	5.67773
Q92610	ZNF592	Zinc finger protein 592	5	5.53694	5.34874	5.46392	5.64942	5.33796	5.16664	5.38688	5.84229	5.80195	5.23681	5.64147	5.45364	5.53545	5.58176	5.60021	5.70588	5.94454	5.76549
P62701	RPS4X	40S ribosomal protein S4, X isoform	5	4.94465	6.05269	5.78684	5.81905	5.01523	6.01364	5.30479	6.3001	5.19915	5.868	5.08456	5.29425	5.21934	5.98398	5.39153	5.8242	5.2397	5.65829
O00754	MAN2B1	Lysosomal alpha-mannosidase	5	6.31673	5.75036	5.50554	5.62067	5.74537	5.56562	5.74225	5.28782	5.58363	5.21661	5.75702	5.52983	5.42239	5.57548	5.72614	5.19184	5.57091	4.89178
Q9GZS1-1	POLR1E	Isoform 1 of DNA-directed RNA polymerase I subunit RPA49	5	5.43664	5.48252	5.26673	5.23077	5.75191	5.61255	5.52465	5.80933	5.61853	5.64318	5.8521	5.5331	5.40507	5.27587	5.69673	5.62628	5.79528	5.43876
P49366	DHPS	Deoxyhypusine synthase	5	5.33423	5.55065	5.53829	5.56401	5.44851	5.6246	5.5386	5.54822	5.3414	5.49701	5.74076	5.71542	5.33865	5.62101	5.60515	5.58791	5.70123	5.70437
P51148-2	RAB5C	Isoform 2 of Ras-related protein Rab-5C	5	5.67339	5.36274	5.66597	5.70874	5.52434	5.30695	5.3804	5.9319	5.60048	5.47266	5.81251	5.56184	5.40924	5.42652	5.55457	5.56714	5.61364	5.42697
P15907	ST6GAL1	Beta-galactoside alpha-2,6-sialyltransferase 1	5	5.65648	5.59861	5.66727	5.64344	5.5888	5.8004	5.32208	5.4725	5.44333	5.58533	5.52961	5.53067	5.25052	5.50917	5.56582	5.70486	5.47049	5.66062
Q13347	EIF3I	Eukaryotic translation initiation factor 3 subunit I	5	4.52997	6.39303	5.70185	5.70243	6.33574	5.68667	6.15659	3.83298	5.57012	6.23589	5.86915	6.36302	6.05968	6.22794	5.28198	6.02148	4.08192	3.94955
Q3YEC7-2	RABL6	Isoform 2 of Rab-like protein 6	5	5.35807	6.32468	5.16335	5.82675	5.41567	6.04248	5.11839	6.32384	5.20555	5.88501	5.15031	5.65437	5.20908	6.06802	5.38164	5.85193	4.70729	5.31357
H0YHG0	H0YHG0	Uncharacterized protein (Fragment)	5	5.82816	5.34519	5.19616	5.70172	5.61501	6.07428	5.27665	6.02113	5.57863	5.58569	5.41041	5.57037	5.37859	5.29824	5.46756	5.69395	5.40994	5.54831
O75170	PPP6R2	Serine/threonine-protein phosphatase 6 regulatory subunit 2	5	5.90205	5.35971	5.45255	5.26942	5.50781	5.57369	5.49182	5.75578	5.27197	5.20914	5.85896	5.89142	5.21789	5.8058	5.26635	5.345	6.05073	5.76992
P62906	RPL10A	60S ribosomal protein L10a	5	5.33783	5.78131	5.82381	5.50677	5.64122	5.26986	5.56491	5.86599	5.65483	5.4991	5.76632	5.77119	5.18105	5.58598	5.59255	5.4619	5.32973	5.36565
O00303	EIF3F	Eukaryotic translation initiation factor 3 subunit F	5	5.41707	5.47285	5.75924	5.76611	5.09152	5.29618	5.57808	5.67692	5.49266	5.28512	5.72504	5.39494	5.52547	5.3908	5.70152	5.8035	5.92291	5.70008
Q9UHG3	PCYOX1	Prenylcysteine oxidase 1	5	5.59161	5.36967	5.50829	5.81386	5.23592	5.28246	5.48741	5.69403	5.80989	5.35238	5.77193	5.7102	5.63897	5.5686	5.50412	5.20991	5.7064	5.74435
Q10471	GALNT2	Polypeptide N-acetylgalactosaminyltransferase 2	5	5.75998	5.9231	5.51559	5.71357	5.62271	5.58482	5.49623	5.76995	5.68119	5.51812	5.22632	5.18038	5.78213	5.73048	5.65576	5.40762	5.18903	5.24302
Q9UHQ1-2	NARF	Isoform 2 of Nuclear prelamin A recognition factor	5	5.59116	5.26045	5.66783	5.36392	5.59156	5.5606	5.63402	5.23505	5.96352	5.61228	5.59341	5.27385	5.52195	5.44847	5.38387	5.7944	5.90639	5.59728
Q9UJX5	ANAPC4	Anaphase-promoting complex subunit 4	5	5.79589	5.61402	5.54196	5.52011	5.1915	5.4347	5.57163	5.73535	5.96251	5.48388	5.58437	5.39806	5.15157	5.6733	5.52841	5.61196	5.67428	5.5265
P62750	RPL23A	60S ribosomal protein L23a	5	4.46692	5.16874	5.6409	5.66742	5.35332	4.48347	5.15552	4.86478	4.8575	5.22953	5.79836	5.27237	5.72328	10.8487	6.02966	4.94536	5.32176	5.17242
Q9BVQ7	SPATA5L1	Spermatogenesis-associated protein 5-like protein 1	5	5.84112	5.61701	5.33318	5.11042	5.90408	5.65962	5.58582	5.70143	5.5307	5.49213	5.57603	5.36649	5.7182	5.55241	5.5075	5.54038	5.59254	5.37094
Q06187-2	BTK	Isoform BTK-C of Tyrosine-protein kinase BTK	5	5.46894	5.93347	5.14884	5.86357	5.45043	5.90952	5.4051	5.9189	5.27049	5.82037	5.08689	5.90402	5.31182	5.82635	5.25217	5.6977	4.92673	5.80471
Q9UBS4	DNAJB11	DnaJ homolog subfamily B member 11	5	5.50632	5.62849	5.11411	5.77369	5.75537	6.07579	5.15254	6.20255	5.47361	5.79403	5.17429	5.73892	5.46726	5.68502	5.25739	5.63967	5.23615	5.3248
Q9UKX7	NUP50	Nuclear pore complex protein Nup50	5	5.77658	5.69609	5.4808	5.3696	5.534	5.58767	5.54468	5.43789	5.91927	5.22707	5.75241	5.47221	5.66435	5.44481	5.62513	5.53634	5.53871	5.39239
Q12768	WASHC5	WASH complex subunit 5	5	5.62742	5.73714	5.1559	5.67789	5.63866	5.86725	5.29284	5.77238	5.53955	5.31464	5.39985	5.62375	5.15831	5.73311	5.34922	5.71118	5.5641	5.83682
Q9UBV2	SEL1L	Protein sel-1 homolog 1	5	5.68194	5.37456	5.64371	5.3764	5.6056	5.30614	5.85174	5.51244	5.51736	5.50552	5.48557	5.55533	5.76793	5.44591	5.81064	5.70272	5.55654	5.29996
Q8TC12	RDH11	Retinol dehydrogenase 11	5	5.29922	5.46317	5.50943	5.56982	5.51225	5.31514	5.61547	5.53796	5.67474	5.4162	5.63341	5.62374	5.39214	5.48187	5.60433	5.56113	5.93945	5.85053
O00743-3	PPP6C	Isoform 3 of Serine/threonine-protein phosphatase 6 catalytic subunit	5	5.38767	5.54138	5.67649	5.39394	5.85907	5.41104	5.70296	5.2845	5.70089	5.55232	5.68202	5.58025	5.9947	5.68603	5.62364	5.48219	5.53295	4.90796
P04406	GAPDH	Glyceraldehyde-3-phosphate dehydrogenase	5	6.49437	7.33521	6.56068	5.21441	5.28945	5.56518	5.34856	5.7301	5.3638	5.21902	5.29132	4.98219	5.26176	5.73663	5.04663	5.47027	5.06092	5.02949
Q9UBL3	ASH2L	Set1/Ash2 histone methyltransferase complex subunit ASH2	5	5.64946	5.69108	5.62387	5.6107	5.59081	5.75493	5.70699	5.67175	5.22499	5.65761	5.52456	5.3402	5.65134	5.61263	5.33128	5.79745	5.33247	5.22788
P46778	RPL21	60S ribosomal protein L21	5	4.68718	5.20078	5.61299	5.95985	5.39713	4.65404	5.65986	4.95628	4.91702	5.59075	5.73861	5.83978	5.65637	7.99839	5.97229	5.07621	5.56187	5.5206
O94901-9	SUN1	Isoform 9 of SUN domain-containing protein 1	5	5.20321	5.59158	5.40037	5.22912	5.7224	5.87744	5.49042	5.56283	5.54422	5.51424	5.54644	5.34167	5.7182	5.6927	5.81423	5.57586	5.61918	5.55587
Q9Y223-2	GNE	Isoform 2 of Bifunctional UDP-N-acetylglucosamine 2-epimerase/N-acetylmannosamine kinase	5	5.70341	5.64532	5.45022	5.81757	5.56032	5.71473	5.43385	5.61881	5.58658	5.44874	5.4775	5.58304	5.60679	5.57931	5.40122	5.5809	5.44817	5.34351
Q6YN16	HSDL2	Hydroxysteroid dehydrogenase-like protein 2	5	5.67694	5.34728	5.70966	5.37874	5.69827	5.48652	5.71125	5.51771	5.55098	5.44277	5.59758	5.50284	5.58953	5.5578	5.7737	5.61262	5.69981	5.14601
Q15648	MED1	Mediator of RNA polymerase II transcription subunit 1	5	5.50233	5.68277	5.79354	5.85956	5.88475	5.39318	5.56781	5.39261	5.48633	5.60693	5.69877	5.17171	5.63685	5.42263	5.5872	5.05969	5.49082	5.76252
P39656	DDOST	Dolichyl-diphosphooligosaccharide--protein glycosyltransferase 48 kDa subunit	5	5.29646	5.5626	5.63291	5.56147	5.64286	5.60422	5.45629	5.59448	5.25389	5.78165	5.5321	5.69681	5.79948	5.78839	5.47624	5.96263	5.09314	5.2644
Q16851	UGP2	UTP--glucose-1-phosphate uridylyltransferase	5	5.64175	5.51671	5.56786	5.51535	5.40418	5.75817	5.7092	5.63671	5.38343	5.8558	5.49131	5.51101	5.40569	5.23076	5.44697	5.72039	5.45141	5.75329
Q5T6F2	UBAP2	Ubiquitin-associated protein 2	5	5.9326	6.12369	5.50544	5.68164	5.82697	5.3083	5.6758	4.43427	5.19173	5.95517	6.29662	5.9823	5.53443	6.04754	5.58799	5.34208	5.01243	4.56099
Q92542	NCSTN	Nicastrin	5	5.66849	5.45084	4.97491	5.37523	5.65946	6.07399	5.34744	5.58038	5.60542	5.49349	5.7001	5.5686	5.60105	5.78726	5.49179	5.63555	5.45534	5.53064
Q9H8H2	DDX31	Probable ATP-dependent RNA helicase DDX31	5	5.01398	5.58762	5.49791	5.54745	5.89944	5.24588	5.64064	5.67645	5.63229	5.58766	5.63731	5.43875	5.62735	5.61954	5.73068	5.55159	5.30434	5.76112
Q9BU89	DOHH	Deoxyhypusine hydroxylase	5	5.68703	4.23232	5.95422	6.03378	5.5128	5.63105	5.98474	5.38319	5.19893	5.51731	5.63873	5.83148	5.76544	5.38741	5.61488	5.41181	5.38708	5.82781
Q7L099-3	RUFY3	Isoform 3 of Protein RUFY3	5	5.54031	5.48854	5.44262	5.88256	5.18754	5.32207	5.78003	5.56735	5.42848	5.66496	5.80483	5.58229	5.81528	5.95149	5.32725	5.43273	5.09535	5.68632
Q6NYC8	PPP1R18	Phostensin	5	6.22473	5.06076	5.47104	5.65968	5.58834	5.49782	5.65448	5.45948	5.56114	5.66633	5.77337	5.20416	5.25604	5.20491	5.37157	5.38387	6.05841	5.90387
Q9BT78	COPS4	COP9 signalosome complex subunit 4	5	5.48609	5.48358	5.48307	5.65293	5.63541	5.50804	5.47897	5.33685	5.61934	5.43462	5.65915	5.64711	5.43801	5.48048	5.6532	5.56847	5.72873	5.70597
P18615-3	NELFE	Isoform 2 of Negative elongation factor E	5	5.60903	5.74457	5.54897	5.03711	5.50428	5.6233	5.78648	5.6569	5.66634	5.72514	5.16292	5.4402	5.84302	5.64136	5.36239	5.80749	5.43552	5.40501
Q00536-2	CDK16	Isoform 2 of Cyclin-dependent kinase 16	5	5.27353	5.24486	5.27563	5.40621	5.93944	5.87252	5.92341	5.56003	5.83737	5.33541	5.55824	5.17202	5.6783	5.67159	5.90358	5.32685	5.42011	5.6009
P28066	PSMA5	Proteasome subunit alpha type-5	5	5.2497	6.0059	5.61159	5.47986	5.78335	5.98027	5.79604	5.15544	5.42884	5.64407	5.52838	5.91597	5.48551	5.79413	5.31748	5.79028	5.09565	4.93755
Q96S66	CLCC1	Chloride channel CLIC-like protein 1	5	5.14817	5.58411	5.29832	5.75741	5.63581	5.33787	5.60168	5.68393	5.51257	5.61512	5.45487	5.87534	5.61718	5.60029	5.68398	5.42609	5.55041	5.61687
P30405	PPIF	Peptidyl-prolyl cis-trans isomerase F, mitochondrial	5	6.07117	5.74304	5.72734	5.83876	5.42895	5.59379	5.91326	5.74003	5.84842	5.5537	5.17236	4.99863	5.39824	5.00358	5.75925	5.08917	5.90613	5.21417
P15498	VAV1	Proto-oncogene vav	5	5.44975	5.43983	5.65336	5.40947	5.76073	5.58754	6.05151	5.22389	5.68896	5.65075	5.55236	5.23701	5.27529	5.64296	5.64562	5.64831	5.62476	5.45788
Q15366-2	PCBP2	Isoform 2 of Poly(rC)-binding protein 2	5	5.2124	5.57751	5.75982	5.55481	5.46211	5.65649	5.89903	5.21781	5.48271	5.37175	5.66399	5.69091	5.96245	5.3808	5.76368	5.50798	5.12301	5.71276
Q99570	PIK3R4	Phosphoinositide 3-kinase regulatory subunit 4	5	5.37392	5.52664	5.44959	5.43182	5.73256	5.79949	5.32765	5.92698	5.45997	5.55123	5.36742	5.63439	5.70199	5.35488	5.49845	5.76252	5.4331	5.66741
Q5PRF9	SAMD4B	Protein Smaug homolog 2	5	5.32791	5.5046	5.80564	5.65333	5.6274	5.29849	5.70245	5.53989	5.56835	5.60811	5.40134	5.38419	5.67338	5.97279	5.51087	5.30409	5.63573	5.48144
P84098	RPL19	60S ribosomal protein L19	5	5.54493	5.51994	5.63791	5.72506	5.51883	5.42858	5.52606	5.33932	5.49955	5.82492	5.67799	5.67071	5.50374	5.30938	5.65499	5.3783	5.73932	5.50048
Q9HC38	GLOD4	Glyoxalase domain-containing protein 4	5	6.10792	5.74776	6.02185	5.61959	5.64477	5.50114	5.75937	5.22331	5.41072	5.51131	5.04773	5.36974	5.59378	5.45931	5.45933	5.65733	5.47995	5.38509
P17174	GOT1	Aspartate aminotransferase, cytoplasmic	5	5.63666	5.69878	5.45787	5.36524	5.59649	5.6737	5.45265	5.51236	5.69308	5.47891	5.49041	5.47865	5.58829	5.53884	5.71899	5.67747	5.56364	5.37796
O95232	LUC7L3	Luc7-like protein 3	5	5.33396	5.51065	5.2616	5.67119	5.85479	5.57787	5.84989	5.61587	5.56815	5.49208	5.54036	5.5463	5.54656	5.63248	5.50881	5.21434	5.71751	5.55759
P38117	ETFB	Electron transfer flavoprotein subunit beta	5	5.45983	5.73803	5.69723	5.2612	5.3569	5.39992	5.8952	5.46773	5.47194	5.57769	5.56359	5.49877	5.8216	5.43632	5.62878	5.43251	5.70381	5.58895
Q08431	MFGE8	Lactadherin	5	5.60455	5.61106	5.55101	5.42989	5.53419	5.9359	5.48561	5.68832	5.3165	5.66542	5.42684	5.60981	5.68923	5.86833	5.4835	5.63922	4.94569	5.51492
Q96T51	RUFY1	RUN and FYVE domain-containing protein 1	5	5.80166	5.57364	5.42086	5.53977	5.6537	5.86605	5.47471	5.32871	5.57507	5.3161	5.67776	5.32657	5.33893	5.92694	5.59928	5.58609	5.4608	5.53334
Q6IA86-6	ELP2	Isoform 6 of Elongator complex protein 2	5	5.57122	5.36002	5.48083	5.41152	5.55118	5.57222	5.52203	5.64748	5.74106	5.53135	5.59411	5.52739	5.53695	5.51232	5.65187	5.60078	5.61454	5.5731
P60228	EIF3E	Eukaryotic translation initiation factor 3 subunit E	5	5.61531	5.60915	5.52045	5.42529	5.69244	5.65051	5.53977	5.38755	5.67963	5.64857	5.45921	5.37366	5.43453	5.83078	5.697	5.58235	5.38855	5.46524
Q13315	ATM	Serine-protein kinase ATM	5	5.73655	5.34399	5.926	5.37125	5.86131	5.42791	5.70529	5.38459	5.70456	5.31404	5.88463	5.35632	5.71253	5.59997	5.19377	5.4987	5.49199	5.48661
P46926	GNPDA1	Glucosamine-6-phosphate isomerase 1	5	5.54616	5.63459	5.64097	5.37596	5.66202	5.85072	5.41808	5.47411	5.71071	5.66829	5.50267	5.57101	5.8529	5.51817	5.44477	5.40353	5.49776	5.22757
O95905-3	ECD	Isoform 3 of Protein ecdysoneless homolog	5	5.4958	5.5342	5.40959	5.76007	5.74818	5.64709	5.54831	5.76842	5.43619	5.50644	5.44637	5.52109	5.70605	5.44686	5.3493	5.75354	5.46676	5.45574
Q8WYN0	ATG4A	Cysteine protease ATG4A	5	5.25665	5.4732	5.61359	5.82151	5.34204	5.648	5.68186	5.51863	5.18754	5.65281	5.62064	5.84947	5.58514	5.5654	5.5044	5.30416	5.6643	5.71066
Q9UH99-2	SUN2	Isoform 2 of SUN domain-containing protein 2	5	5.57145	5.73145	5.5572	5.41211	5.36929	5.69648	5.49271	5.23328	5.84496	5.68176	5.6329	5.57524	5.60821	5.54404	5.49268	5.18886	5.8468	5.52058
Q9ULA0	DNPEP	Aspartyl aminopeptidase	5	5.81442	5.87504	5.52127	5.54026	5.53711	5.53325	5.52462	5.88922	5.7301	5.55089	5.57589	5.52145	5.30436	5.65266	5.23738	5.37301	5.34387	5.47522
Q02809-2	PLOD1	Isoform 2 of Procollagen-lysine,2-oxoglutarate 5-dioxygenase 1	5	5.59801	5.80078	5.43463	5.64728	5.54961	5.61753	5.59335	5.6089	5.47063	5.51537	5.39671	5.50161	5.66882	5.38466	5.58626	5.43218	5.60059	5.59308
Q9H9A5-6	CNOT10	Isoform 6 of CCR4-NOT transcription complex subunit 10	5	5.02184	5.14253	5.5645	5.58958	5.71767	5.48952	5.6179	5.50233	5.31782	5.38524	5.61553	5.87158	5.74577	5.70549	5.95072	5.63184	5.37682	5.75332
Q9BTX1	NDC1	Nucleoporin NDC1	5	5.33973	5.23373	5.58373	5.65825	5.51544	5.51023	5.74104	5.3684	5.5244	5.70934	5.57407	5.71947	5.58816	6.13516	5.73012	5.46307	5.25728	5.34839
O95299	NDUFA10	NADH dehydrogenase [ubiquinone] 1 alpha subcomplex subunit 10, mitochondrial	5	4.72837	5.69217	5.7328	5.99065	5.51698	5.0659	5.98158	5.27322	5.36233	5.67021	5.85199	5.43026	5.90312	6.38226	5.89391	5.0294	5.14732	5.3475
Q9BZD4	NUF2	Kinetochore protein Nuf2	5	5.639	5.58727	5.53455	5.37135	5.60035	5.35619	5.51461	5.61037	5.43652	5.73464	5.47495	5.62013	5.53884	5.529	5.56235	5.9118	5.65559	5.3225
P31321	PRKAR1B	cAMP-dependent protein kinase type I-beta regulatory subunit	5	5.44854	6.00833	5.49851	5.75744	5.56294	5.89985	5.21625	6.05775	5.48511	5.32427	5.15745	5.48672	5.47969	5.42665	5.26949	5.96482	5.47621	5.47998
Q9Y4P3	TBL2	Transducin beta-like protein 2	5	5.55812	5.79895	5.58045	5.16727	5.91435	5.74264	5.48223	5.71922	5.52259	5.60766	5.62521	5.52505	5.62709	5.18638	5.6966	5.49362	5.29115	5.46143
Q6ZT62	BARGIN	Bargin	5	5.48537	5.56046	5.78614	5.3907	5.78318	5.11343	5.39212	5.58345	5.74922	5.49364	5.66836	5.64239	5.73953	5.3618	5.67713	5.32822	5.76988	5.47498
Q9NW13	RBM28	RNA-binding protein 28	5	5.5681	5.53394	5.52866	5.43345	5.81989	5.64256	5.46548	5.64049	5.70522	5.56127	5.46308	5.24735	5.69482	5.66984	5.54561	5.52496	5.39566	5.55963
Q9BUP3-3	HTATIP2	Isoform 3 of Oxidoreductase HTATIP2	5	5.26864	5.66599	5.60225	5.63675	5.71624	5.71016	5.65653	4.8395	5.29434	5.66061	5.7207	5.46837	5.41869	5.1641	5.58933	6.06571	5.86254	5.65954
P51572-2	BCAP31	Isoform 2 of B-cell receptor-associated protein 31	5	5.50506	5.57914	5.37915	5.70781	5.3694	5.2543	5.38426	5.39961	5.46559	5.6706	5.68841	5.92609	5.4634	5.5902	5.64621	5.60359	5.51309	5.85408
Q8NEY1	NAV1	Neuron navigator 1	5	5.42691	5.42534	5.41098	5.61008	5.76051	5.78704	5.9061	5.57415	5.39657	5.4517	5.83954	5.37775	5.08407	5.34372	5.38035	5.70118	5.65232	5.87169
Q9H4L4	SENP3	Sentrin-specific protease 3	5	5.95899	5.4972	4.88591	5.76726	5.61016	5.74312	5.08715	5.14993	5.67575	5.26267	5.46663	5.85722	5.67238	5.42303	5.77429	5.49151	5.68461	5.9922
Q9NZN4	EHD2	EH domain-containing protein 2	5	5.27193	5.43831	5.50521	5.53649	5.45995	5.60627	5.41335	5.88276	5.51346	5.61237	5.54033	5.59115	5.33377	5.61745	5.27329	5.79087	5.64381	5.96923
P28908	TNFRSF8	Tumor necrosis factor receptor superfamily member 8	5	5.54096	5.88126	5.46667	5.52478	5.71909	5.6721	5.4847	5.74612	5.63825	5.60183	5.53841	5.28771	5.67407	5.42389	5.49225	5.29145	5.39422	5.62225
Q6V1X1	DPP8	Dipeptidyl peptidase 8	5	5.8067	5.72128	5.47164	5.51747	5.71704	5.34495	5.14239	5.54837	5.3141	5.63629	5.5045	5.82301	5.61539	5.44788	5.62677	5.7682	5.3521	5.64193
Q9C037	TRIM4	E3 ubiquitin-protein ligase TRIM4	5	5.55782	5.31786	5.36578	5.4637	5.31163	5.6477	5.66295	5.3796	5.50911	5.81471	5.44641	5.39588	5.56801	5.6305	5.74926	5.73336	5.71033	5.73539
P48729	CSNK1A1	Casein kinase I isoform alpha	5	5.34365	5.44066	5.60163	5.69042	5.41314	5.44561	5.36144	5.33174	5.59264	5.84527	5.54492	5.60668	5.62678	5.77388	5.71228	5.44958	5.71768	5.50197
Q9H3H3-3	C11orf68	Isoform 3 of UPF0696 protein C11orf68	5	5.40633	5.19665	5.57917	5.19328	5.67558	5.24803	5.90983	5.81251	5.60246	5.3655	5.68059	5.82088	5.70343	5.51349	5.45713	5.60246	5.84274	5.38995
Q92769	HDAC2	Histone deacetylase 2	5	5.44515	5.55424	5.37024	5.54421	5.53325	5.91906	5.46454	5.74583	5.91788	5.52058	5.55601	5.63384	5.58867	5.28433	5.25855	5.29177	5.75823	5.61362
Q8TDY4	ASAP3	Arf-GAP with SH3 domain, ANK repeat and PH domain-containing protein 3	5	5.58909	5.65648	5.47512	5.23526	5.46924	5.59143	5.41787	5.4836	5.50956	5.50472	5.44238	5.43148	5.74583	5.74628	5.58707	5.568	5.6786	5.86798
Q9BYD2	MRPL9	39S ribosomal protein L9, mitochondrial	5	5.56632	5.13144	5.79325	5.80014	6.02025	5.36196	5.7219	5.26943	5.59378	5.27682	5.89759	5.45349	5.79903	5.10403	5.59727	5.29962	5.60011	5.71357
Q9BTV4	TMEM43	Transmembrane protein 43	5	5.82289	5.78843	5.3118	5.63802	5.40376	5.48696	5.44488	5.64764	5.47884	5.65931	5.55748	5.58582	5.5088	5.52041	5.44001	5.59389	5.77066	5.34039
Q9P270	SLAIN2	SLAIN motif-containing protein 2	5	5.85471	5.4814	5.55742	5.27265	5.32776	5.62842	5.74231	6.27385	5.59051	5.65609	5.33089	5.00978	5.53758	5.64988	5.39032	5.71274	5.42205	5.56165
Q9UGI8	TES	Testin	5	5.79577	5.65501	5.8697	5.46825	5.70757	5.31059	5.83159	5.51726	5.32556	5.58725	5.55585	5.43588	5.4209	5.86016	5.50941	5.45005	5.24842	5.45079
P51178-2	PLCD1	Isoform 2 of 1-phosphatidylinositol 4,5-bisphosphate phosphodiesterase delta-1	5	5.45536	5.71316	5.52332	5.32583	5.49254	5.56469	5.47315	5.45148	5.49686	5.78047	5.95104	5.73065	5.61834	5.32311	5.58769	5.52794	5.40288	5.58149
Q9P2K8	EIF2AK4	eIF-2-alpha kinase GCN2	5	5.50889	5.86473	5.59496	5.32942	5.4555	5.46696	5.62573	5.93228	5.5827	5.40387	5.54501	5.44708	5.59492	5.31812	5.71667	5.084	5.70943	5.81973
P15104	GLUL	Glutamine synthetase	5	5.22253	6.51542	5.0119	5.87393	5.64131	5.19754	5.24784	5.65317	4.64048	5.91194	5.64701	6.02888	5.40348	6.81988	5.2125	5.28724	5.25548	5.42945
P32929	CTH	Cystathionine gamma-lyase	5	5.37452	5.35657	5.41211	5.54994	5.33047	5.55714	5.72668	5.4721	5.42282	5.85547	5.67688	5.65429	5.55504	5.88227	5.79602	5.52514	5.13008	5.72247
Q9UBP6	METTL1	tRNA (guanine-N(7)-)-methyltransferase	5	5.35616	5.22992	5.65131	5.85962	5.43026	5.72607	5.40686	5.48556	5.3444	5.7619	5.58987	5.613	5.55052	5.51952	5.59253	5.57959	5.80056	5.50236
Q96EV2	RBM33	RNA-binding protein 33	5	5.54172	5.24633	6.33745	5.67054	5.65228	5.72915	5.88803	5.41288	5.31246	4.94421	5.95777	5.36396	5.87188	5.06273	5.22747	5.77082	5.62608	5.38422
O60563	CCNT1	Cyclin-T1	5	5.65928	5.20863	5.66154	5.55637	5.27655	5.70052	5.44346	5.41802	5.77268	5.28747	5.91667	5.70597	5.52968	5.32309	5.61368	5.133	6.00067	5.79272
P61289-2	PSME3	Isoform 2 of Proteasome activator complex subunit 3	5	5.55225	5.6201	5.47146	5.75121	5.31394	5.41655	5.47186	5.73367	5.47413	5.54049	5.4672	5.61945	5.4973	5.66602	5.51023	5.61594	5.58116	5.69704
P51665	PSMD7	26S proteasome non-ATPase regulatory subunit 7	5	5.57526	5.57345	5.6374	5.83016	5.62721	5.62372	5.61801	5.57165	5.42342	5.45318	5.40863	5.73343	5.77588	5.60397	5.61668	5.21539	5.30863	5.40394
P61201	COPS2	COP9 signalosome complex subunit 2	5	5.34743	5.4993	5.41389	5.56497	5.40565	5.67892	5.32719	5.78538	5.50023	5.73726	5.33484	5.54115	5.60916	5.72759	5.41108	5.79021	5.62494	5.70082
Q6UWP7	LCLAT1	Lysocardiolipin acyltransferase 1	5	5.28436	5.33702	5.62133	5.46119	5.73461	5.71981	5.49614	5.74051	5.52541	5.76586	5.46262	5.45226	5.43217	5.90521	5.3245	5.84803	5.13128	5.75768
Q16629	SRSF7	Serine/arginine-rich splicing factor 7	5	5.38102	5.45505	5.52586	5.66462	5.46538	5.76074	5.80908	5.10556	5.81995	5.51551	5.74871	5.577	5.69215	5.11407	5.45656	5.71594	5.63134	5.56146
Q9BWE0-4	REPIN1	Isoform 2 of Replication initiator 1	5	5.61344	5.03638	6.04547	5.91636	5.5721	5.34798	5.62255	5.79294	5.79659	5.36332	5.3267	5.35236	5.62119	5.26088	5.88867	5.18128	5.62678	5.63502
Q9NY61	AATF	Protein AATF	5	5.86888	5.38095	5.30873	5.65564	5.59603	5.70018	5.60623	5.63311	5.56157	5.47479	5.70434	5.46069	5.47117	5.5426	5.42468	5.39124	5.65105	5.56811
O43768-4	ENSA	Isoform 4 of Alpha-endosulfine	5	5.7216	5.37927	5.38524	5.65871	5.92776	5.60987	5.4011	5.37535	5.63998	5.77732	5.24735	5.21852	5.72117	5.75384	5.38394	5.55642	5.72155	5.52102
P49773	HINT1	Histidine triad nucleotide-binding protein 1	5	4.2271	6.1903	5.78862	5.2802	5.75437	5.31858	6.18209	4.25008	5.48229	6.14762	6.45282	6.77268	6.05085	6.12217	5.109	5.87632	4.52957	4.46533
Q96M27-2	PRRC1	Isoform 2 of Protein PRRC1	5	5.47323	5.66453	5.51454	5.41354	5.57949	5.61527	5.30212	5.68507	5.55448	5.60916	5.42795	5.60064	5.49481	5.4899	5.55847	5.68096	5.55648	5.77936
Q9H0H5	RACGAP1	Rac GTPase-activating protein 1	5	5.49522	6.20621	5.47425	5.58705	5.40335	5.63124	5.49935	5.58477	5.40534	5.57783	5.42234	5.65765	5.4451	5.80466	5.48428	5.58219	5.24238	5.49677
Q9H147	DNTTIP1	Deoxynucleotidyltransferase terminal-interacting protein 1	4	5.399	5.60295	5.7601	5.43084	5.83698	5.42174	6.02096	5.70369	5.72948	5.35996	5.62805	5.51776	5.50613	5.42335	5.0531	5.34297	5.54663	5.71632
P53618	COPB1	Coatomer subunit beta	4	5.61806	5.67514	5.61715	5.52237	5.59918	5.36115	5.66529	5.71893	5.40319	5.73473	5.54068	5.89455	5.29864	5.26559	5.25788	5.63921	5.64205	5.54621
Q9NXC5	MIOS	GATOR complex protein MIOS	4	6.00341	5.33755	5.66999	5.30419	5.19625	5.80745	5.38635	5.68601	5.52845	5.3496	5.26141	5.62492	5.43372	6.01081	5.46848	5.26541	5.8238	5.84218
P09493-5	TPM1	Isoform 5 of Tropomyosin alpha-1 chain	4	5.35954	5.1058	5.36138	5.22883	4.87498	5.5402	5.5137	5.75669	5.41517	5.17437	5.6578	6.0346	5.81532	5.58184	5.95561	5.75451	6.03779	5.83186
P67809	YBX1	Y-box-binding protein 1	4	5.2177	5.49777	5.47874	5.46044	5.63409	5.35632	5.83997	5.76983	5.48148	5.49347	5.36097	5.32178	5.66818	5.28393	6.00513	5.77082	5.61698	5.74238
P09496-2	CLTA	Isoform Non-brain of Clathrin light chain A	4	5.41139	5.69199	6.03237	5.95999	5.69848	5.05689	5.86574	5.48489	5.48777	5.40377	5.51562	5.46705	5.22421	5.22954	5.6725	5.26745	5.63622	5.89411
Q96T58	SPEN	Msx2-interacting protein	4	5.87255	6.11811	5.07404	5.74774	5.49989	5.38343	5.14902	5.48981	5.56165	6.05285	5.42102	5.66099	5.23351	5.32618	5.47281	5.58983	5.44662	5.89995
P49257	LMAN1	Protein ERGIC-53	4	5.06267	5.58039	5.23807	6.35831	5.81366	5.00343	5.66024	5.84669	5.27437	5.64741	5.69155	5.31488	5.51535	5.91586	5.58141	5.44507	5.5816	5.46902
Q96CT7	CCDC124	Coiled-coil domain-containing protein 124	4	5.89856	5.46266	5.57933	5.47311	5.37815	5.37655	5.33374	5.68201	5.84992	5.49377	5.66809	5.34975	5.59453	5.25332	5.83256	5.49202	5.86167	5.42027
P19623	SRM	Spermidine synthase	4	5.08655	5.61871	5.73238	5.86929	5.41602	5.51888	5.75633	5.1342	5.24152	5.66984	5.88746	5.67144	5.74002	5.1028	5.41177	5.77221	5.66568	5.7049
Q8TCJ2	STT3B	Dolichyl-diphosphooligosaccharide--protein glycosyltransferase subunit STT3B	4	5.70095	5.52127	5.90555	5.37039	5.71703	5.48889	5.75756	5.67011	5.65869	5.46319	5.67316	5.35651	5.42713	5.54274	5.43702	5.54612	5.23674	5.52694
Q9BZE9-2	ASPSCR1	Isoform 2 of Tether containing UBX domain for GLUT4	4	5.82445	5.75592	5.20153	6.1056	5.88361	5.30196	5.30558	5.58837	5.44613	4.82385	5.14934	5.36915	6.00418	5.58298	5.65691	5.59996	5.55485	5.84564
O95747	OXSR1	Serine/threonine-protein kinase OSR1	4	5.78124	5.51256	5.46279	5.25814	5.58753	5.36781	5.7939	5.00283	5.64967	5.74125	5.58959	5.38219	5.46306	5.40429	5.88722	5.59255	6.07919	5.44416
Q92797	SYMPK	Symplekin	4	5.5316	5.44865	5.29524	5.66419	5.19227	5.61657	5.58995	5.69445	5.35412	5.41012	5.47878	5.71868	5.46136	5.46857	5.50999	5.71013	5.92315	5.93219
P42684	ABL2	Tyrosine-protein kinase ABL2	4	5.40511	5.48119	5.6847	5.45513	5.68933	5.93312	5.90739	5.37758	5.21842	6.10955	5.31092	5.45299	5.69292	5.41415	4.99623	5.47269	5.34523	6.05333
P15336	ATF2	Cyclic AMP-dependent transcription factor ATF-2	4	5.80717	5.55401	5.82019	5.45195	5.56683	5.7517	5.63813	5.09887	5.82474	5.30859	5.53085	5.3534	5.45351	5.60977	5.84369	5.22574	5.69817	5.46267
Q14534	SQLE	Squalene monooxygenase	4	5.56244	5.35604	5.51895	5.26854	5.38379	5.48095	5.39578	5.24567	5.47982	5.8499	5.73062	5.66853	5.61107	5.60947	5.71306	5.69759	5.74279	5.68497
Q9P289	STK26	Serine/threonine-protein kinase 26	4	5.48333	5.11132	5.68081	5.59275	6.06939	5.86706	5.48627	5.54072	5.42288	5.67971	5.49177	5.26386	5.56235	5.40431	5.36722	5.6518	5.48614	5.83833
Q96NA2	RILP	Rab-interacting lysosomal protein	4	5.50025	5.4921	5.49684	5.61749	5.46428	5.5542	5.35256	5.83073	5.46997	5.60076	5.47999	5.6773	5.49739	5.62277	5.50721	5.82093	5.32321	5.69202
Q7Z5K2-3	WAPL	Isoform 3 of Wings apart-like protein homolog	4	5.61498	5.52288	5.46768	5.56589	5.40611	5.47154	5.37522	5.62792	5.47472	5.6083	5.56446	5.28492	5.73802	5.69149	5.65325	5.72232	5.65702	5.55328
P62910	RPL32	60S ribosomal protein L32	4	5.80912	5.5276	5.68678	5.27703	5.64247	5.2269	5.75287	5.53221	5.50634	5.52171	5.81639	5.80608	5.43955	5.31218	5.6631	5.26374	5.87089	5.34503
Q9NZL4-3	HSPBP1	Isoform 3 of Hsp70-binding protein 1	4	5.60729	5.53428	5.58081	4.95813	5.61794	5.67441	4.97194	5.59868	5.80183	5.46569	5.51076	5.86836	5.51529	5.7834	5.67343	5.42934	5.47541	5.93301
Q08378	GOLGA3	Golgin subfamily A member 3	4	5.56258	5.19725	5.61998	5.8591	5.23227	5.4057	5.60353	5.59594	5.48774	5.36275	5.70016	5.34797	5.53836	5.49485	5.52178	5.33322	6.19183	5.94499
Q9H269	VPS16	Vacuolar protein sorting-associated protein 16 homolog	4	5.99928	5.7544	5.58354	5.18493	5.65507	5.59921	5.43356	5.51453	5.55505	5.41484	5.60879	5.55564	5.52312	5.68926	5.58915	5.39377	5.75549	5.19038
Q2VPK5	CTU2	Cytoplasmic tRNA 2-thiolation protein 2	4	5.61641	5.68657	5.65405	5.83824	5.37146	5.43206	5.45823	5.56914	5.85034	5.29784	5.54814	5.2281	5.67876	5.33827	5.90664	5.36031	5.69374	5.4717
Q9BQ39	DDX50	ATP-dependent RNA helicase DDX50	4	5.82412	5.52804	5.3735	5.47581	5.52652	5.39594	5.3019	5.61417	5.48006	5.61054	5.71123	5.64621	5.55788	5.75639	5.54014	5.45797	5.62708	5.5725
Q6P9B9	INTS5	Integrator complex subunit 5	4	5.40268	5.59604	5.48942	5.43077	5.44391	5.4945	5.36635	5.6279	5.52907	5.52371	5.73082	5.70053	5.48338	5.72401	5.6043	5.55954	5.53872	5.75436
Q6AI08	HEATR6	HEAT repeat-containing protein 6	4	5.049	5.38691	5.42101	5.3584	5.51604	5.13648	5.54043	5.54717	5.53191	5.28861	5.54148	5.74323	5.61171	6.09084	5.84364	5.79935	5.91186	5.68193
Q8N653	LZTR1	Leucine-zipper-like transcriptional regulator 1	4	5.44787	5.25816	5.59521	5.51444	5.58444	5.43116	6.06068	5.52584	5.08567	5.2511	4.88616	5.8564	5.61368	5.75391	5.28052	6.3216	5.52278	6.01038
P48449	LSS	Lanosterol synthase	4	5.53783	5.50534	5.26142	5.42086	5.83497	5.61146	5.46583	5.814	5.73562	5.70193	5.1312	5.50691	5.48467	5.63282	5.76777	5.6486	5.58492	5.35384
Q9Y2G5	POFUT2	GDP-fucose protein O-fucosyltransferase 2	4	5.63031	5.59809	5.25863	5.58774	5.52238	5.82043	5.28793	5.82615	5.65872	5.37813	5.52602	5.65042	5.69808	5.64194	5.45529	5.67431	5.43615	5.34928
Q86WV6	STING1	Stimulator of interferon genes protein	4	5.52979	5.74238	5.46136	5.42211	5.49344	5.58468	5.41476	5.65174	5.50646	5.72614	5.45133	5.57272	5.64972	5.39011	5.35966	5.7237	5.69718	5.62273
Q9BZF3-5	OSBPL6	Isoform 5 of Oxysterol-binding protein-related protein 6	4	5.53037	5.45625	5.59367	5.72066	5.5085	5.6144	5.17352	5.49444	5.73396	5.49905	5.73161	5.8097	5.43064	5.54619	5.50883	5.15426	5.79533	5.69862
Q6PI48	DARS2	Aspartate--tRNA ligase, mitochondrial	4	5.85031	5.82574	5.21807	5.6221	5.74592	5.72267	5.61811	5.92663	5.32742	5.637	5.42746	5.52032	5.70581	5.5127	5.59519	5.46614	5.06655	5.21187
Q8N3P4	VPS8	Vacuolar protein sorting-associated protein 8 homolog	4	5.68649	5.42014	5.54859	5.7726	5.20983	5.49144	5.63503	5.41257	5.52879	5.68925	5.75945	5.42341	5.15231	5.35627	5.55313	5.9102	5.72196	5.72853
Q9H8Y8-3	GORASP2	Isoform 3 of Golgi reassembly-stacking protein 2	4	5.12168	5.64142	5.56964	5.31314	5.81407	5.65988	5.62565	5.58911	5.40058	5.74718	5.64913	5.77021	5.42148	5.65432	5.33137	5.90092	5.457	5.33323
P52298	NCBP2	Nuclear cap-binding protein subunit 2	4	5.48411	5.75037	5.81304	5.54366	5.86775	5.82696	5.60952	5.51435	5.54994	5.4906	5.26753	5.50632	5.86857	5.56206	5.58437	5.58634	5.17335	5.00116
P61970	NUTF2	Nuclear transport factor 2	4	3.25366	6.00273	5.87468	4.53048	6.46977	5.12529	6.4314	3.61557	5.40683	5.77626	6.9883	7.71567	6.58496	7.00876	5.17279	5.97972	4.04502	4.01811
Q9H4E7	DEF6	Differentially expressed in FDCP 6 homolog	4	5.47522	5.76288	5.55275	5.49943	5.69937	5.30863	5.87679	5.53304	5.89296	5.47875	5.46587	5.23743	5.49334	5.72845	5.22829	5.56671	5.84828	5.3518
O43815	STRN	Striatin	4	5.76443	5.65482	5.34053	5.47061	5.54508	5.39782	5.77141	5.30004	5.70662	5.74597	6.0054	5.72711	5.37746	5.48824	5.6677	5.66328	5.03457	5.33892
Q9NSE4	IARS2	Isoleucine--tRNA ligase, mitochondrial	4	5.15694	5.31109	5.70729	5.49531	5.79809	6.18368	5.18561	5.73351	5.52656	5.49365	5.80523	5.47934	5.76899	5.72785	5.65066	5.23813	5.27657	5.4615
Q9NUQ3	TXLNG	Gamma-taxilin	4	5.38735	5.59521	5.39909	5.69772	5.30238	5.60244	5.48309	5.73104	5.46753	5.75537	5.44368	5.56271	5.5675	5.56792	5.49331	5.71197	5.50689	5.72481
Q9UHB6	LIMA1	LIM domain and actin-binding protein 1	4	5.34092	5.23733	5.66098	5.32875	5.48939	5.3414	5.40362	5.42921	6.18192	5.2251	5.5052	5.63103	5.60451	5.51573	5.69964	5.6409	5.88	5.88436
Q15424-3	SAFB	Isoform 3 of Scaffold attachment factor B1	4	5.76346	5.81957	5.70863	5.40501	5.70126	5.49003	5.61352	5.46133	5.4415	5.66756	5.42914	5.45762	5.6604	5.56818	5.56262	5.38774	5.33524	5.5272
O15116	LSM1	U6 snRNA-associated Sm-like protein LSm1	4	5.87834	5.44975	5.81336	5.19038	5.54329	5.55342	5.52602	5.54284	6.05816	5.3889	5.67113	5.30884	5.71143	5.26881	5.44726	5.27096	5.84343	5.5337
P46013	MKI67	Proliferation marker protein Ki-67	4	5.56363	6.2349	5.8161	5.76573	5.23814	4.92748	5.76367	5.69394	5.42688	6.39056	5.38164	5.58193	5.08444	5.26068	5.11025	5.56468	5.53941	5.65593
O43633	CHMP2A	Charged multivesicular body protein 2a	4	5.08116	5.48831	5.51573	5.46991	5.27362	5.29638	5.67516	4.91084	5.38402	5.63908	5.59456	5.79309	5.91982	5.9953	5.90021	5.874	5.17751	6.0113
Q969G3	SMARCE1	SWI/SNF-related matrix-associated actin-dependent regulator of chromatin subfamily E member 1	4	5.84275	5.41015	5.37928	5.04562	5.73435	5.6171	5.53246	5.5613	5.64632	5.33862	5.70866	5.36352	5.63207	5.26741	5.95119	5.65784	5.65956	5.65178
Q9Y6W3	CAPN7	Calpain-7	4	5.81631	5.63794	5.76595	5.66405	5.45308	5.35724	5.55901	5.60178	5.6578	5.52513	5.2767	5.26086	5.45994	5.29229	5.63566	5.51036	5.73017	5.79575
P00505	GOT2	Aspartate aminotransferase, mitochondrial	4	5.64009	5.44483	5.72776	5.27003	5.56084	5.3875	5.66832	5.52823	5.87102	5.53909	5.5217	5.41928	5.70735	5.31223	5.49556	5.34277	5.80604	5.75737
P07355-2	ANXA2	Isoform 2 of Annexin A2	4	5.85597	5.26349	5.45855	5.33307	5.91018	5.63654	5.7967	5.40473	5.48759	5.55442	5.33139	5.01977	5.44732	5.61559	5.60808	5.49076	5.57462	6.21125
P0DJD1	RGPD2	RANBP2-like and GRIP domain-containing protein 2	4	5.49327	5.32977	5.26164	6.04864	5.24287	5.72972	5.67905	5.65641	5.38735	5.52652	5.8622	5.66447	5.53483	5.67264	5.58171	5.72832	5.39901	5.20158
Q07864	POLE	DNA polymerase epsilon catalytic subunit A	4	5.51422	5.65465	5.72346	5.34564	5.62668	4.97621	5.50991	5.45249	5.85095	5.62344	5.57663	5.65532	5.51755	5.02967	5.81661	5.83523	5.56112	5.73024
Q13136	PPFIA1	Liprin-alpha-1	4	5.7501	5.35293	5.4547	5.2241	6.52512	5.65232	5.24257	5.76229	5.11096	5.56286	6.45084	5.2809	5.0134	5.09722	5.53319	5.64081	5.84147	5.50423
Q14692	BMS1	Ribosome biogenesis protein BMS1 homolog	4	5.33468	5.41877	5.60097	5.76515	5.60664	5.56372	5.34713	5.62831	5.78389	5.7053	5.36631	5.36279	5.53	5.59173	5.2755	5.73067	5.5618	5.82665
Q8IWS0	PHF6	PHD finger protein 6	4	5.15537	6.00939	5.05128	5.90643	5.06039	5.90309	5.01158	5.9478	4.98228	6.02671	5.26198	5.73527	5.10922	6.65475	5.65093	5.5678	5.29082	5.67491
Q8NDZ2-5	SIMC1	Isoform 5 of SUMO-interacting motif-containing protein 1	4	5.46792	5.41483	5.34462	5.46083	5.11696	5.16378	5.64076	5.56289	5.49285	5.90651	5.59983	5.61102	5.59557	5.5131	5.60007	5.98269	5.71916	5.80661
Q9Y680	FKBP7	Peptidyl-prolyl cis-trans isomerase FKBP7	4	5.65732	5.53165	5.86979	5.55357	5.43503	5.51552	5.35265	5.43334	5.53319	5.49538	5.79707	5.56525	5.59794	5.38893	5.56709	5.53946	5.59555	5.57128
P48634	PRRC2A	Protein PRRC2A	4	5.73011	5.60119	5.78149	5.62351	5.60362	5.10318	5.64295	5.68145	5.68953	5.72785	5.8619	5.32759	5.60611	4.9234	5.65961	5.2221	5.6788	5.53561
O60610	DIAPH1	Protein diaphanous homolog 1	4	5.46905	5.78867	5.21072	5.88666	5.65353	5.88657	5.36297	6.08449	5.26977	5.70964	5.05568	5.37764	5.49766	5.91533	5.32244	5.87049	5.07337	5.56535
Q6IA69	NADSYN1	Glutamine-dependent NAD(+) synthetase	4	5.87966	5.84321	5.70922	5.67421	5.77654	5.59051	5.51326	5.66418	5.70407	5.13877	5.04106	5.32738	5.4693	5.48705	5.51201	5.38339	5.67872	5.60746
Q92551	IP6K1	Inositol hexakisphosphate kinase 1	4	5.75507	5.55567	5.49765	5.69518	5.07601	5.49985	5.35756	5.69089	5.28776	5.29523	5.75768	5.77906	5.43241	5.81871	6.09944	5.3207	5.95721	5.1239
Q9P0U4-2	CXXC1	Isoform 2 of CXXC-type zinc finger protein 1	4	5.57483	5.79052	5.52597	5.99151	5.74621	5.42215	5.47504	5.52847	5.70571	5.56203	5.56588	5.72402	5.325	5.52109	5.19527	5.21009	5.65367	5.48253
Q96CD2	PPCDC	Phosphopantothenoylcysteine decarboxylase	4	6.00485	5.13736	5.8913	5.88527	5.60245	4.94436	5.12127	5.6599	5.3443	5.82837	5.59987	5.08505	5.03432	5.1332	6.05318	6.00152	5.70216	5.97128
Q9NXG2	THUMPD1	THUMP domain-containing protein 1	4	5.60478	5.56721	5.17688	5.81683	5.69518	5.57605	5.61098	5.77435	5.54145	5.60415	5.18856	5.66692	5.61226	5.30437	5.53896	5.71599	5.39258	5.61248
P50453	SERPINB9	Serpin B9	4	6.00695	5.49167	5.41001	5.1799	5.87043	5.90322	5.03602	5.66949	5.82212	5.12426	5.45915	5.30423	5.36358	5.46689	5.59498	5.40647	6.10188	5.78877
P35237	SERPINB6	Serpin B6	4	5.77331	5.42843	5.42015	5.83275	5.81727	5.40471	5.5175	5.80449	5.41263	5.32491	5.56191	5.07393	5.55431	5.56362	5.45852	5.47848	5.9354	5.63768
P17028	ZNF24	Zinc finger protein 24	4	5.75208	5.08393	5.56117	5.55685	5.50758	5.69604	5.49086	5.08612	5.31803	5.28105	5.83062	5.54463	5.79373	5.68794	5.63693	5.56023	5.94306	5.66915
Q9Y5J1	UTP18	U3 small nucleolar RNA-associated protein 18 homolog	4	5.77423	5.54768	5.68262	5.44483	5.79874	5.33713	5.55382	5.15065	5.70425	5.52235	6.07148	5.37913	5.50373	5.28922	5.7326	5.34036	5.71837	5.4488
Q9UPU5	USP24	Ubiquitin carboxyl-terminal hydrolase 24	4	5.8189	5.17386	5.33589	5.48348	5.78383	5.00452	5.93654	5.51245	5.82126	5.27195	5.58585	5.3355	5.3749	5.51554	6.27272	5.45113	5.60131	5.72035
Q5JTZ9	AARS2	Alanine--tRNA ligase, mitochondrial	4	5.94576	6.11759	6.17308	5.67589	5.74983	5.58734	5.41875	5.70773	5.76894	5.42032	5.63745	5.56255	5.12595	4.95889	5.22389	4.96298	6.08382	4.87923
Q6ZSZ5	ARHGEF18	Rho guanine nucleotide exchange factor 18	4	5.50701	5.33578	6.13673	5.50245	5.24562	5.50174	5.48102	5.57628	5.05988	5.59717	5.6617	4.87439	5.53882	5.82565	5.5189	5.79247	5.78077	6.06362
Q8NBX0	SCCPDH	Saccharopine dehydrogenase-like oxidoreductase	4	5.59538	5.5758	5.35451	5.53435	5.83553	5.73154	5.7997	5.60219	5.34958	5.5819	5.66483	5.35735	5.57935	5.68581	5.54382	5.44742	5.46119	5.29974
Q9NZT2	OGFR	Opioid growth factor receptor	4	5.74617	5.66424	5.9081	5.38732	5.33879	5.57983	5.56334	5.59677	5.64977	5.26829	5.47908	5.61159	5.73168	5.18613	5.58601	5.4111	5.58743	5.70437
Q13488	TCIRG1	V-type proton ATPase 116 kDa subunit a3	4	5.43291	5.66141	5.27601	5.71955	5.59263	5.33424	5.83022	5.30022	6.10455	5.3625	5.93385	5.41687	5.77652	5.40491	5.38039	5.4686	5.46589	5.53873
O75947	ATP5PD	ATP synthase subunit d, mitochondrial	4	5.02413	6.04784	5.67861	5.59736	5.77512	5.34864	5.85804	4.59117	5.64868	5.76387	5.66412	5.92291	5.97595	6.2135	5.31369	5.82583	4.5071	5.24344
O43182	ARHGAP6	Rho GTPase-activating protein 6	4	5.42279	5.67034	5.9525	5.68681	5.65745	5.38257	5.56942	5.64919	5.30893	5.23952	5.72218	5.32133	5.46825	5.41659	5.67946	5.55113	5.5928	5.70874
Q96HA7-2	TONSL	Isoform 2 of Tonsoku-like protein	4	5.41424	5.13336	5.7574	5.64521	5.63757	5.39395	5.44719	5.52429	5.5549	5.53651	5.88284	5.68884	5.18581	5.6871	5.53464	5.58281	5.61221	5.78114
Q8N5L8	RPP25L	Ribonuclease P protein subunit p25-like protein	4	5.48724	5.5862	5.64613	5.75152	5.42631	5.38212	5.51131	5.76134	5.55608	5.60371	5.47181	5.4572	5.45645	5.81913	5.68258	5.68234	5.38217	5.33634
Q9UQ16-4	DNM3	Isoform 4 of Dynamin-3	4	5.54023	5.52817	5.71042	5.38858	5.68389	5.54772	5.60962	5.6877	5.40105	5.32343	5.40566	5.46749	5.73323	5.55493	5.71854	5.85544	5.47972	5.36417
O00170	AIP	AH receptor-interacting protein	4	5.45878	5.80369	5.5862	5.22446	5.33973	5.53684	5.34201	5.8433	5.55115	5.67596	5.42101	5.50484	5.31024	5.61333	5.5109	5.76064	5.63347	5.88345
Q8IXB1	DNAJC10	DnaJ homolog subfamily C member 10	4	5.71037	5.31193	5.55805	5.46436	5.55873	5.60018	5.81323	5.80736	5.46467	5.47698	5.55047	5.59247	5.50931	5.41223	5.78866	5.27977	5.59082	5.51038
Q9BS26	ERP44	Endoplasmic reticulum resident protein 44	4	5.66089	5.72211	5.34192	5.48783	5.53508	5.20788	5.74437	5.26546	5.53653	5.3475	5.74239	5.72918	5.43792	5.4927	5.75707	5.39985	5.94319	5.64813
Q96TC7	RMDN3	Regulator of microtubule dynamics protein 3	4	5.89094	5.69545	5.88732	5.63465	5.63435	5.68781	5.54899	5.72263	5.82326	5.39028	5.5577	5.24157	5.48276	5.32165	5.54282	5.12708	5.25825	5.5525
Q9BQ04	RBM4B	RNA-binding protein 4B	4	5.32373	6.15383	5.90645	5.86363	5.90945	5.59984	5.96361	3.38436	5.86774	6.08025	6.01039	6.4446	5.72948	6.08234	5.51349	5.85884	4.59421	3.71377
Q9H4B7	TUBB1	Tubulin beta-1 chain	4	5.53679	5.58329	5.50741	5.79883	5.84996	5.21615	5.3965	5.894	5.49715	5.4722	5.49984	5.43119	5.61485	5.33767	5.59044	5.44252	5.48805	5.84315
P68371	TUBB4B	Tubulin beta-4B chain	4	5.83549	5.58729	5.71987	5.7851	5.39947	5.2418	5.35357	5.24337	5.58974	5.53207	5.81317	5.4971	5.87842	5.81946	5.57663	5.46676	5.29971	5.36099
O00291	HIP1	Huntingtin-interacting protein 1	4	5.72709	5.23903	5.61012	5.88385	5.72403	5.6911	5.81327	5.72272	5.38692	5.35422	5.25813	5.87787	5.46799	5.42943	5.13294	5.46129	5.64016	5.57984
Q96KM6	ZNF512B	Zinc finger protein 512B	4	5.94985	6.02835	5.40214	5.84404	5.51643	5.23659	5.58023	5.21014	5.55434	6.48754	5.68972	5.15269	5.66302	5.2896	5.4384	5.34645	5.4323	5.17817
Q9C0J8	WDR33	pre-mRNA 3' end processing protein WDR33	4	5.61557	6.00431	5.36257	5.63609	4.89095	5.11626	6.7218	5.58775	4.61652	5.55327	5.65325	5.59525	5.37453	5.979	5.13373	5.68601	5.79408	5.67903
P02549	SPTA1	Spectrin alpha chain, erythrocytic 1	4	5.25181	5.73269	5.46775	5.37928	5.17397	5.66084	5.47545	5.00085	5.30288	5.95764	5.54899	6.14594	5.48114	6.01209	5.27224	6.28259	5.3178	5.53606
P83731	RPL24	60S ribosomal protein L24	4	5.77057	5.9489	5.67242	5.54173	5.76261	5.56156	5.50697	5.45735	5.34024	5.90608	5.56838	5.37463	5.51668	5.54512	5.62362	5.32394	5.30147	5.27772
Q9Y5M8	SRPRB	Signal recognition particle receptor subunit beta	4	5.38832	5.88381	5.59945	5.41974	5.66047	5.80715	5.56586	5.78873	5.27451	5.67944	5.08924	5.63738	5.57136	5.38538	5.43071	5.94038	5.25377	5.62431
Q5TFE4	NT5DC1	5'-nucleotidase domain-containing protein 1	4	4.74626	5.43137	5.27413	5.54704	5.48604	5.05775	5.35121	5.47238	5.2575	5.8118	5.73725	6.10955	5.86503	6.06814	5.70878	5.73608	5.6775	5.66218
Q01650	SLC7A5	Large neutral amino acids transporter small subunit 1	4	5.74894	5.46614	5.70613	5.0981	5.5185	5.60467	5.8694	5.76197	5.45284	5.40939	5.50774	5.51201	5.45539	5.49642	5.31771	5.72166	5.74925	5.60371
Q5T8P6	RBM26	RNA-binding protein 26	4	5.6797	5.75082	5.57808	5.63688	5.54844	5.58965	5.44999	5.62197	5.33711	5.78945	5.45345	5.61384	5.78965	5.41115	5.32965	5.79393	5.06649	5.55974
Q8IX90	SKA3	Spindle and kinetochore-associated protein 3	4	5.42523	5.53396	5.72484	5.38278	5.59159	4.8905	5.84468	5.75851	5.48635	5.55491	5.54746	5.63507	5.73251	5.54049	5.09206	5.65795	5.66593	5.93518
P43304	GPD2	Glycerol-3-phosphate dehydrogenase, mitochondrial	4	5.96206	5.47733	5.64731	5.57085	5.45693	5.29141	5.75146	5.68982	5.82929	5.13584	5.62379	5.32774	5.82298	5.43438	5.49505	5.3823	5.70207	5.39938
Q14651	PLS1	Plastin-1	4	5.7492	5.06876	5.76809	5.30239	5.60002	5.49261	5.83231	5.22723	5.79704	5.4165	5.64076	5.70696	5.62242	5.02098	5.65413	5.58522	5.72586	5.78953
O43172	PRPF4	U4/U6 small nuclear ribonucleoprotein Prp4	4	5.62443	5.8571	5.66788	5.7075	5.59045	5.68854	5.74086	5.52559	5.74829	5.54597	5.5628	5.47889	5.752	5.50015	5.49402	5.18319	5.02859	5.30372
Q5VTL8	PRPF38B	Pre-mRNA-splicing factor 38B	4	5.35288	5.99245	5.04958	5.92927	5.56042	6.04714	5.26051	6.13747	5.17193	5.65566	5.19475	5.72292	5.35903	5.66127	5.28396	5.78035	5.17557	5.66483
P78316	NOP14	Nucleolar protein 14	4	5.55825	5.75929	5.58431	5.69072	5.61253	5.94361	5.64163	5.62287	5.32983	5.38442	5.63372	5.43651	5.57561	5.35016	5.40506	5.26688	5.80565	5.39897
P51530	DNA2	DNA replication ATP-dependent helicase/nuclease DNA2	4	5.74306	5.12689	5.50219	5.82044	5.46808	5.51732	5.25878	5.12111	5.8601	5.43132	5.87862	5.75712	5.35339	5.31556	5.54584	5.74861	5.8485	5.70306
Q92530	PSMF1	Proteasome inhibitor PI31 subunit	4	4.29333	5.9742	5.81173	5.10791	6.14725	5.29668	6.26886	4.27547	5.85546	5.69256	6.49199	6.50576	6.28334	6.32142	5.14634	5.47268	4.68709	4.36795
O94905	ERLIN2	Erlin-2	4	5.80228	5.96736	5.90017	5.28307	5.76716	5.90226	5.61509	5.43461	5.66451	5.31828	5.26615	5.57213	5.78207	5.49449	5.5907	5.39057	5.0416	5.2075
Q9NXW2-2	DNAJB12	Isoform 2 of DnaJ homolog subfamily B member 12	4	5.57255	5.35973	5.75819	5.45892	5.29901	5.50374	5.59568	5.5004	5.72272	5.65586	5.57185	5.65888	5.52633	5.39638	5.56364	5.36597	5.69877	5.79136
Q9NZJ0	DTL	Denticleless protein homolog	4	5.80654	5.55649	5.64422	4.84069	4.82567	4.85504	5.81733	6.29078	5.80853	5.9877	6.2897	5.87414	5.01555	4.82485	5.03087	5.90726	5.91687	5.70776
O75063	FAM20B	Glycosaminoglycan xylosylkinase	4	5.57765	5.32889	5.49964	5.51675	5.64076	5.69167	5.75111	5.70878	5.45146	5.27142	5.56387	5.43498	5.5619	5.48392	5.54961	5.66419	5.65556	5.64784
Q8IZV5	RDH10	Retinol dehydrogenase 10	4	5.48391	5.5694	5.16163	5.3523	5.63	5.38689	5.7686	5.44017	5.4774	5.75589	5.65686	5.5792	5.68623	5.83652	5.73931	5.31637	5.63325	5.52606
O76021	RSL1D1	Ribosomal L1 domain-containing protein 1	4	6.01443	5.44631	5.56289	5.25981	5.86438	5.31188	5.71602	5.53503	5.68003	5.53842	5.51083	5.3385	5.96451	5.39413	5.99764	5.29001	5.53621	5.03898
Q96KC8	DNAJC1	DnaJ homolog subfamily C member 1	4	5.56025	5.06018	5.4746	5.48491	5.50303	5.28388	5.55809	5.18264	5.34422	5.51338	5.95995	5.74479	5.76084	5.42578	5.85506	5.5509	5.85643	5.88106
Q9ULW0-2	TPX2	Isoform 2 of Targeting protein for Xklp2	4	6.10535	5.51267	5.38157	5.44743	5.39642	5.73422	5.70974	5.32997	5.51755	5.52291	5.41419	5.50302	5.70234	5.5048	5.37389	5.53696	6.00732	5.29964
Q9NQ48	LZTFL1	Leucine zipper transcription factor-like protein 1	4	5.99473	5.88209	5.57077	5.51623	5.45648	5.48099	5.36606	5.30082	5.68586	5.37262	5.87228	5.48564	5.38605	5.41575	5.60073	5.38974	5.77561	5.44754
P04181	OAT	Ornithine aminotransferase, mitochondrial	4	5.56358	6.23641	5.49912	5.87217	5.64237	5.97279	5.7247	5.59841	4.49071	5.29366	5.12251	6.05754	5.89756	5.76946	4.96413	5.72049	5.25612	5.31824
Q13485	SMAD4	Mothers against decapentaplegic homolog 4	4	5.49776	5.70492	5.789	5.18476	5.44586	5.54103	5.44713	5.60816	5.48139	5.40445	5.60221	5.6869	5.43737	5.51085	5.29001	5.70796	5.82389	5.83635
P43155	CRAT	Carnitine O-acetyltransferase	4	5.38945	5.10392	6.21963	5.3004	5.32468	5.47253	5.61548	5.34462	5.78457	5.68338	5.5487	5.48497	5.71904	5.1675	5.51686	5.52356	6.02304	5.77766
Q9Y5X1	SNX9	Sorting nexin-9	4	5.4528	5.66218	5.78275	5.61571	5.42207	5.2702	5.61165	5.81496	5.75526	5.09983	5.96259	5.33828	5.83116	5.35714	5.52619	5.20404	5.65112	5.64206
Q9Y483	MTF2	Metal-response element-binding transcription factor 2	4	5.78099	5.1513	5.58514	5.59632	5.34665	5.39108	5.61264	5.62388	5.7204	5.67374	5.63785	5.51611	5.58494	5.31781	5.74683	5.55316	5.86801	5.29314
Q96JN0-3	LCOR	Isoform 3 of Ligand-dependent corepressor	4	5.58384	5.92297	6.03717	5.63344	5.55481	5.30181	5.4534	5.9081	5.11565	5.38434	5.05563	5.27707	6.03018	5.37788	5.04246	5.78943	5.84426	5.68756
Q9H6Z4	RANBP3	Ran-binding protein 3	4	5.75939	5.22627	5.84282	5.74841	5.57675	5.65121	5.74115	5.41552	5.5882	5.23517	5.76163	5.36921	5.71139	5.46065	5.5319	5.3629	5.56004	5.45739
Q93008-3	USP9X	Isoform 2 of Probable ubiquitin carboxyl-terminal hydrolase FAF-X	4	5.71489	5.57407	5.88266	5.69528	5.41736	5.49666	5.50504	5.78598	5.38418	5.66346	5.6881	5.34892	5.47795	5.30022	5.32497	5.38124	5.7681	5.59091
Q14669-3	TRIP12	Isoform 3 of E3 ubiquitin-protein ligase TRIP12	4	5.72774	5.92702	5.49504	5.40652	5.21384	5.35547	5.363	6.1526	5.14903	5.81754	5.98541	5.21238	5.142	5.44391	5.18195	5.53863	5.74952	6.1384
Q14653	IRF3	Interferon regulatory factor 3	4	5.71298	5.59671	5.32251	5.89774	5.74071	5.6723	5.37766	5.82208	5.61779	5.68178	5.23134	4.98301	5.6656	5.71914	5.25509	5.54771	5.57193	5.58394
Q96L91	EP400	E1A-binding protein p400	4	6.03637	5.39777	5.75628	5.37536	5.59834	5.43018	5.40792	5.32082	5.35218	5.33759	5.69045	5.31529	5.34668	5.59748	5.56391	5.74607	6.02707	5.70026
A2A3N6	PIPSL	Putative PIP5K1A and PSMD4-like protein	4	5.72234	5.83948	5.35707	5.54808	5.58057	5.99559	5.69074	5.19627	5.93456	5.16814	5.93365	5.94881	5.64665	5.23394	5.40991	5.45957	5.28841	5.04623
Q9UNS2-2	COPS3	Isoform 2 of COP9 signalosome complex subunit 3	4	5.32205	5.73409	5.43543	5.61265	5.68796	5.87723	5.41964	5.51923	5.62412	5.8285	5.47448	5.53412	5.32831	5.66133	5.52202	5.62511	5.18883	5.6049
P82930	MRPS34	28S ribosomal protein S34, mitochondrial	4	5.69592	5.81604	5.57884	5.54336	5.61355	5.41303	5.66236	5.3452	5.87701	5.45989	5.5516	5.36669	5.42102	5.81058	5.54633	5.71833	5.34682	5.23342
Q00403	GTF2B	Transcription initiation factor IIB	4	5.45632	8.19944	5.4893	5.68441	5.32323	5.42689	5.10296	6.60144	4.9557	5.39604	5.16453	5.54273	4.70464	5.23991	5.74995	5.42017	5.2338	5.30856
Q9GZT9	EGLN1	Egl nine homolog 1	4	5.38796	5.41602	5.3011	5.46338	5.71567	5.64523	5.39488	5.47823	5.36027	5.92071	5.53847	5.65181	5.35321	5.42064	5.65196	5.75861	5.93356	5.60832
Q9Y4C2	TCAF1	TRPM8 channel-associated factor 1	4	5.59738	6.12672	5.39289	5.30698	5.41785	5.55318	5.63912	6.03899	5.59197	5.56796	5.67953	5.33739	5.32046	5.43132	5.53439	5.5618	5.76208	5.13998
Q8WXW3	PIBF1	Progesterone-induced-blocking factor 1	4	5.87917	5.64848	5.66869	5.57544	5.6907	5.54299	5.63192	5.33745	5.46742	5.54653	5.42364	5.36353	5.30008	5.79821	5.37779	5.73798	5.37794	5.63206
Q9Y5K6	CD2AP	CD2-associated protein	4	5.32324	5.53746	5.59034	5.34132	5.47869	5.75851	5.45581	5.56285	5.53483	5.46012	5.52631	5.5527	5.41718	5.48999	5.63371	5.73145	5.69839	5.90711
O60264	SMARCA5	SWI/SNF-related matrix-associated actin-dependent regulator of chromatin subfamily A member 5	4	5.59951	5.37775	5.56172	5.60014	5.53287	5.13118	5.75397	5.68367	5.68535	5.55201	5.81702	5.40807	5.50906	5.55982	5.73065	5.6915	5.42074	5.385
Q9P2E5	CHPF2	Chondroitin sulfate glucuronyltransferase	4	5.80617	5.80143	5.07399	5.53295	5.3106	5.87165	5.6346	5.90996	5.70537	4.66157	5.5117	5.93034	5.80235	5.54748	5.28087	5.14887	5.25322	6.2169
Q8IZH2	XRN1	5'-3' exoribonuclease 1	4	5.8641	5.44904	5.49271	5.56438	5.30848	5.29776	5.49447	5.50578	5.58252	5.52771	5.80921	5.20458	5.72586	5.11686	5.65815	5.84789	5.87223	5.67827
O60832	DKC1	H/ACA ribonucleoprotein complex subunit DKC1	4	5.91953	6.05096	5.88486	5.55449	5.77649	5.40614	5.57368	5.56421	5.48018	5.65352	5.47695	5.10239	5.39224	5.17871	6.00964	5.15671	5.11211	5.70722
Q9BRP4	PAAF1	Proteasomal ATPase-associated factor 1	4	5.71935	5.39224	5.66693	5.68405	5.86286	5.55102	5.57833	5.68812	5.39244	5.57337	5.49896	5.58413	5.43477	5.49089	5.58431	5.43608	5.38696	5.4752
Q99816	TSG101	Tumor susceptibility gene 101 protein	4	5.7603	5.4421	5.76132	5.25361	5.7313	5.49199	5.75668	5.45671	5.80648	5.28616	5.69346	5.54726	5.67073	5.21248	5.60014	5.28225	5.91444	5.33259
Q96Q15	SMG1	Serine/threonine-protein kinase SMG1	4	5.2908	5.332	5.96259	5.69274	5.68825	5.46116	5.71333	5.73952	5.46813	5.58561	5.45295	5.52878	5.68145	5.60321	5.45115	5.43083	5.50233	5.41518
Q330K2	NDUFAF6	NADH dehydrogenase (ubiquinone) complex I, assembly factor 6	4	5.3748	5.50932	5.39796	5.27537	5.51942	5.40152	5.28517	5.61948	6.45352	5.38285	5.51647	5.51604	5.28656	5.82497	5.48751	5.60152	5.82823	5.71929
Q9UHI6	DDX20	Probable ATP-dependent RNA helicase DDX20	4	5.76444	5.81645	5.42896	5.39514	5.93251	5.80085	5.60173	5.93087	5.54116	5.6295	5.10036	5.21269	5.82585	5.70348	5.43548	5.52888	5.03859	5.31309
Q9NR12	PDLIM7	PDZ and LIM domain protein 7	4	5.61751	5.68404	5.36399	5.71344	5.38401	5.56621	5.78951	4.99299	5.64513	5.59851	5.88149	5.35303	5.62157	5.23039	5.51742	5.36078	6.16319	5.5168
P06396	GSN	Gelsolin	4	5.43674	5.95176	5.2278	5.82703	5.19259	5.64886	5.87681	5.45627	5.46551	5.65696	5.73674	5.72654	5.29402	5.6748	5.4904	5.58768	5.15249	5.59701
Q99426	TBCB	Tubulin-folding cofactor B	4	5.35995	5.32127	5.63523	5.44314	4.9855	5.61589	5.17236	5.1923	5.5712	5.43158	6.33733	5.92045	5.94474	5.33633	5.81499	5.52793	5.88794	5.50187
O76031	CLPX	ATP-dependent Clp protease ATP-binding subunit clpX-like, mitochondrial	4	5.63223	5.52403	5.50678	5.32846	5.79933	5.73467	5.58419	5.6443	5.98751	5.51676	5.46805	5.13141	5.54822	5.74593	5.81328	5.31575	5.4187	5.3004
Q6P1N0	CC2D1A	Coiled-coil and C2 domain-containing protein 1A	4	5.38546	5.43325	5.62168	5.26024	5.55739	5.50135	5.08343	5.87614	5.55642	5.73013	5.39071	5.42716	5.53864	5.63858	5.38629	5.85178	5.65948	6.10187
Q13907-2	IDI1	Isoform 2 of Isopentenyl-diphosphate Delta-isomerase 1	4	5.47586	5.61222	5.64746	5.12272	5.26121	5.54835	5.5302	5.4338	5.83824	5.59241	5.60966	5.48271	5.38426	5.71483	5.51274	5.73552	5.89646	5.60136
O14777	NDC80	Kinetochore protein NDC80 homolog	4	5.5014	5.54871	5.53558	5.62773	5.65534	5.3518	5.37442	5.93772	5.466	5.67754	5.79642	5.14578	5.55428	5.57653	5.70878	5.5339	5.40812	5.59998
Q03701	CEBPZ	CCAAT/enhancer-binding protein zeta	4	5.47602	6.01844	5.57001	5.48682	5.60697	5.79707	5.61218	5.51995	5.67485	5.3947	5.51571	5.37269	5.61601	5.44097	5.70573	5.39856	5.28573	5.50759
P36957	DLST	Dihydrolipoyllysine-residue succinyltransferase component of 2-oxoglutarate dehydrogenase complex, mitochondrial	4	5.20767	5.71452	5.67636	5.52574	5.37905	5.4175	5.7763	5.73928	5.44195	5.50641	5.63103	5.59848	5.3542	5.54395	5.55913	5.46286	5.61864	5.84694
Q8N1G1	REXO1	RNA exonuclease 1 homolog	4	5.38697	5.67933	6.20729	5.68546	5.53222	5.33664	5.79618	5.50214	5.30232	5.41254	5.62444	5.90982	5.26041	5.43411	5.58255	5.36722	5.50998	5.47038
O75943	RAD17	Cell cycle checkpoint protein RAD17	4	5.36422	5.54015	5.42024	5.95945	5.19752	5.6691	5.61032	5.46464	5.30326	5.64294	5.574	5.83099	5.40128	5.74578	5.82698	5.53161	5.22434	5.69318
Q8IY81	FTSJ3	pre-rRNA 2'-O-ribose RNA methyltransferase FTSJ3	4	5.07281	5.35604	5.59113	5.67667	5.19611	5.11159	5.96294	5.34177	5.7101	5.43157	5.64208	5.32493	6.10614	5.89354	5.94263	5.76326	5.35487	5.52182
Q5BJF6	ODF2	Outer dense fiber protein 2	4	5.71247	4.95814	5.23007	5.0213	5.70998	5.31225	5.25834	5.29558	5.50831	5.67482	6.38008	5.90074	5.34981	5.40677	5.38629	6.075	5.83101	5.98903
Q9BZI7	UPF3B	Regulator of nonsense transcripts 3B	4	5.5035	6.24072	5.28563	5.73836	5.75912	6.03588	5.56222	5.22032	5.45129	6.08769	5.15182	5.69344	5.32633	5.3232	5.6237	5.40956	5.43514	5.15209
Q9UHL4	DPP7	Dipeptidyl peptidase 2	4	5.62361	5.24701	5.15735	5.43911	5.56154	5.03367	5.2886	5.75905	5.73235	5.50001	5.38969	5.90354	6.01734	5.31963	5.47211	5.63275	5.92429	5.99836
O00116	AGPS	Alkyldihydroxyacetonephosphate synthase, peroxisomal	4	5.76934	5.72414	5.52774	5.43916	5.57755	5.41327	5.55778	5.68696	5.3921	5.36074	5.66355	5.47986	5.25419	5.2559	5.44625	5.83447	5.87494	5.74206
Q9Y426	C2CD2	C2 domain-containing protein 2	4	6.24865	5.4693	5.79098	5.69126	5.54497	5.59949	5.39609	5.72452	5.49552	5.74264	5.40207	5.26558	5.68958	5.14147	4.97115	5.58094	5.71561	5.53017
Q9H9J4	USP42	Ubiquitin carboxyl-terminal hydrolase 42	4	5.42583	5.68114	5.40665	5.52423	5.52845	5.65288	5.64447	5.82316	5.83326	5.57087	5.56803	5.16197	5.59928	5.8357	5.65783	5.31931	5.46982	5.29711
Q14566	MCM6	DNA replication licensing factor MCM6	4	5.73678	5.48955	5.48312	5.77198	5.56701	6.20469	5.49046	5.92288	4.9174	5.47814	5.18926	5.67724	5.06898	5.57293	5.62921	5.68842	5.37685	5.7351
P98171-2	ARHGAP4	Isoform 2 of Rho GTPase-activating protein 4	4	6.02373	5.4481	5.76285	5.29994	5.01319	5.8109	6.08947	5.9879	5.06161	5.38469	5.70162	5.67804	5.22544	5.06047	5.68332	5.29062	5.87597	5.60214
Q504Q3-2	PAN2	Isoform 2 of PAN2-PAN3 deadenylation complex catalytic subunit PAN2	4	5.21345	5.14248	5.69921	5.54762	5.30027	5.62826	5.47506	5.75336	5.29015	5.71431	5.40205	6.1828	5.87718	5.20705	5.83007	5.76177	5.40605	5.56887
P13073	COX4I1	Cytochrome c oxidase subunit 4 isoform 1, mitochondrial	4	5.67017	5.63416	5.51137	5.29322	5.56605	5.9493	5.46092	5.4312	5.16602	5.85196	5.57954	5.59467	5.38024	5.46369	5.84393	5.50792	5.60617	5.48946
O60518	RANBP6	Ran-binding protein 6	4	5.59967	5.62633	5.39704	5.84165	5.29202	5.53233	5.47671	5.81889	5.25938	6.03451	5.2675	5.5361	5.48748	5.56041	5.42661	5.79742	5.6311	5.41483
P23526	AHCY	Adenosylhomocysteinase	4	5.60653	5.56283	5.56794	5.64406	5.53744	5.82509	5.34233	5.76756	5.3873	5.57143	5.56978	5.79627	5.48071	5.54432	5.30403	5.47537	5.51061	5.50641
Q8TBA6	GOLGA5	Golgin subfamily A member 5	4	6.02429	5.58265	5.56495	6.01244	5.31163	5.65863	5.52378	5.32061	5.39462	5.22481	5.74707	5.43943	5.53242	5.31938	5.59883	5.76227	5.30596	5.67625
P02100	HBE1	Hemoglobin subunit epsilon	4	5.67599	5.7751	5.18755	5.63943	5.42142	5.33204	5.56352	5.50293	5.18416	5.63747	6.03932	5.56972	5.72911	5.4601	5.27675	5.5701	5.99148	5.4438
Q9P1Z2	CALCOCO1	Calcium-binding and coiled-coil domain-containing protein 1	4	5.16582	5.8383	5.61571	5.35836	5.20567	5.65649	5.53021	5.48881	5.19017	5.64044	5.78166	5.85904	5.65582	5.15585	5.43918	5.95102	5.50611	5.96136
P12004	PCNA	Proliferating cell nuclear antigen	4	5.87136	5.54824	5.56977	5.53502	5.65514	5.88044	5.6234	5.50305	5.63112	5.56532	5.29206	5.22729	5.56422	5.46064	5.51773	5.80868	5.38082	5.36571
Q6NW34	NEPRO	Nucleolus and neural progenitor protein	4	5.82172	5.67271	5.64229	5.20922	5.82518	5.73863	5.6351	5.22693	5.21109	5.72668	5.67214	5.28892	5.6807	5.36378	5.45185	5.59116	6.0019	5.24002
Q8NDF8-5	TENT4B	Isoform 5 of Terminal nucleotidyltransferase 4B	4	5.42538	5.26584	5.96985	5.50261	5.42286	5.63648	5.40769	5.53224	5.93888	5.40391	5.58223	5.48851	5.89274	5.10991	5.91942	4.94669	5.63368	5.92107
Q6PJG6	BRAT1	BRCA1-associated ATM activator 1	4	5.54409	5.56595	5.44183	5.70429	5.75456	5.58028	5.57328	5.62392	5.35262	5.31514	5.57067	5.81788	5.4809	5.3859	5.74498	5.38689	5.68402	5.4728
Q9H9E3	COG4	Conserved oligomeric Golgi complex subunit 4	4	5.59883	5.54289	5.68166	5.08735	5.19061	5.18209	5.46627	5.30983	5.23182	6.26708	5.47501	5.73891	5.11306	5.35887	6.26317	5.65908	5.59928	6.2342
P62191	PSMC1	26S proteasome regulatory subunit 4	4	5.75625	5.48625	5.92627	5.77375	5.80269	5.70984	5.53452	5.55263	4.83813	5.70787	5.3684	5.54576	5.29427	5.9674	5.15783	5.62697	5.27596	5.67521
Q9Y2U8	LEMD3	Inner nuclear membrane protein Man1	4	6.10955	5.8045	5.10697	5.48107	5.4234	5.82208	5.68271	5.84358	5.76649	5.50969	5.1696	5.4652	5.82133	5.33312	5.40141	5.58227	5.1874	5.48966
Q99848	EBNA1BP2	Probable rRNA-processing protein EBP2	4	5.58913	5.66893	5.33212	5.69946	5.5804	5.62097	5.62691	5.7981	5.3732	5.66537	5.5181	5.43083	5.55978	5.79625	5.57676	5.54188	5.23208	5.38973
Q9BTE3	MCMBP	Mini-chromosome maintenance complex-binding protein	4	5.45069	5.39482	5.38098	5.06362	5.26767	5.55205	5.48654	5.59184	5.78954	4.99698	5.89428	5.5794	5.60293	5.63428	5.82853	5.65178	6.04903	5.78503
O95819-3	MAP4K4	Isoform 3 of Mitogen-activated protein kinase kinase kinase kinase 4	4	5.96045	5.39323	5.77506	5.58456	5.39176	5.68205	5.69901	5.68485	5.76062	5.62952	5.90283	5.56416	5.39811	4.96301	5.03468	5.18735	5.72955	5.65919
P54098	POLG	DNA polymerase subunit gamma-1	4	5.70545	5.7248	5.36043	5.30753	5.19579	5.98911	5.27406	6.12845	5.76957	5.43667	5.36286	5.56463	5.42787	5.69874	5.19833	5.78638	5.34002	5.72931
P68032	ACTC1	Actin, alpha cardiac muscle 1	4	6.13871	5.98936	5.83433	5.74733	5.19873	5.68358	6.17699	5.3353	5.44704	4.94391	5.90792	5.62713	5.11818	5.01319	5.30719	5.62018	5.48243	5.42849
O95218	ZRANB2	Zinc finger Ran-binding domain-containing protein 2	4	5.79858	5.76286	5.24506	5.99576	5.78829	5.97102	5.21048	5.96198	5.26164	5.40196	4.90694	5.78664	5.56031	6.02828	5.44538	5.86837	5.0236	4.98285
Q01081-2	U2AF1	Isoform 2 of Splicing factor U2AF 35 kDa subunit	4	5.59563	5.37729	5.47366	5.35153	5.70663	5.63105	5.88322	5.68108	5.36586	5.57545	5.44842	5.62905	5.85319	5.54509	5.72703	5.73931	5.32649	5.09002
Q02978	SLC25A11	Mitochondrial 2-oxoglutarate/malate carrier protein	4	5.74711	5.46149	5.6518	5.35945	5.76692	5.72866	5.42303	5.39553	5.31148	5.40553	5.92043	5.46539	5.4864	5.49645	5.61535	5.86843	5.54453	5.35202
Q96EK5	KIFBP	KIF-binding protein	4	5.61332	5.4135	5.62129	5.65496	5.17656	5.56048	5.52199	5.55053	5.51795	5.58154	5.769	5.9094	5.36375	5.60875	5.4954	5.30044	5.85093	5.4902
Q14527	HLTF	Helicase-like transcription factor	4	5.78371	6.09718	6.01861	5.0126	5.8649	5.76759	5.31228	5.19498	5.24869	5.41775	5.40202	5.58154	5.34853	5.66378	5.42284	5.15094	5.52337	6.18869
Q7Z3U7	MON2	Protein MON2 homolog	4	5.797	5.63272	5.72514	5.15334	5.90431	5.48144	5.90557	5.54136	5.76813	5.53536	5.53875	5.2152	5.63389	5.36718	5.60316	5.1305	5.68533	5.38164
P27348	YWHAQ	14-3-3 protein theta	4	5.51376	5.70363	5.57922	5.53653	5.76516	5.55634	5.81385	5.71	5.75802	5.40691	5.4016	5.79936	5.76221	5.65579	5.57314	5.2826	5.30849	4.87338
O95789	ZMYM6	Zinc finger MYM-type protein 6	4	5.49084	5.21034	5.59606	5.49589	5.68878	5.20948	5.57872	5.54639	5.53123	5.53187	5.77933	5.26787	5.53428	5.17702	5.91326	5.78855	6.01711	5.64298
Q8N0W3-2	FCSK	Isoform 2 of L-fucose kinase	4	5.32031	5.57553	5.42651	5.68643	5.51176	5.86206	5.47828	5.69226	5.28229	5.30794	5.442	5.81958	5.27093	5.38751	5.86584	5.46238	5.58981	6.01859
P15121	AKR1B1	Aldo-keto reductase family 1 member B1	4	5.57143	5.89089	5.67606	5.78326	5.84245	5.84088	5.7526	5.4981	5.73804	5.48647	5.16403	5.02099	5.57343	5.39266	5.35177	5.63166	5.50991	5.27537
Q9UJX2	CDC23	Cell division cycle protein 23 homolog	4	5.52224	5.58087	5.56566	5.75189	5.49223	5.51778	5.78637	5.73568	5.43022	5.30673	5.99832	5.65877	5.18582	5.70426	5.11059	5.56514	5.51811	5.56932
Q9Y2Z0	SUGT1	Protein SGT1 homolog	4	5.77573	5.93506	5.0165	5.98822	5.88675	6.13179	4.92406	5.78641	5.00168	5.79044	5.21245	5.54116	5.26534	6.08907	5.33812	5.79965	4.99124	5.52635
Q2NL82	TSR1	Pre-rRNA-processing protein TSR1 homolog	4	5.28518	5.73326	5.31158	5.65266	5.49147	5.85012	5.26571	5.95166	5.33449	5.63906	5.29693	5.74267	5.45078	5.62636	5.37275	5.79326	5.51573	5.68633
O75808	CAPN15	Calpain-15	4	5.63466	5.25579	5.73615	5.40378	5.08468	5.51694	5.84866	5.79526	5.47246	5.50283	5.81445	5.56038	5.42185	5.19333	5.75024	5.33658	5.86377	5.80818
Q9BTU6	PI4K2A	Phosphatidylinositol 4-kinase type 2-alpha	4	5.11108	5.51443	5.73738	5.41262	5.4476	5.45582	5.71013	5.58542	5.78857	5.58234	5.76245	5.48438	5.55112	5.3295	5.56937	5.50004	5.54089	5.91686
O76003	GLRX3	Glutaredoxin-3	4	5.32085	5.3057	5.61515	5.40125	5.6427	5.62695	5.71144	5.30222	5.67213	5.48505	5.59455	5.36796	5.70597	5.56403	5.63137	5.61564	5.81879	5.61823
Q9UNS1	TIMELESS	Protein timeless homolog	4	5.61951	5.6098	5.25776	5.62343	5.71084	5.65412	5.50378	5.04971	5.38225	5.97218	5.42569	5.87911	5.69892	5.37218	5.37983	5.57629	5.64701	5.63762
Q14247-2	CTTN	Isoform 2 of Src substrate cortactin	4	5.92483	5.70847	5.25945	5.44812	5.653	5.81571	5.28653	5.40987	5.44014	5.6909	5.75539	5.5947	5.52235	5.70811	5.22008	5.58767	5.72385	5.25083
P62979	RPS27A	Ubiquitin-40S ribosomal protein S27a	4	5.88689	5.65617	5.75271	5.66913	5.2046	5.66261	5.3056	5.69717	5.64203	5.18703	5.43343	5.65493	4.98311	5.50684	5.69965	5.58458	5.76691	5.70661
P30566	ADSL	Adenylosuccinate lyase	4	5.60811	5.60759	5.73539	5.88532	5.43365	5.20956	5.62631	5.79618	5.64228	5.39857	5.5589	5.64494	5.35824	5.49599	5.52076	5.34112	5.63179	5.5053
O95394-4	PGM3	Isoform 3 of Phosphoacetylglucosamine mutase	4	5.96563	5.91432	5.23471	5.93823	5.42131	5.18343	5.19746	5.53503	4.99295	5.76371	5.34789	5.82586	5.34094	5.58114	5.6937	5.50526	5.53697	6.02145
O43237	DYNC1LI2	Cytoplasmic dynein 1 light intermediate chain 2	4	5.16407	5.76819	5.91173	5.5137	5.20277	5.49125	5.82447	5.57527	5.24992	5.39077	5.38399	5.83997	5.68219	5.4579	5.60322	5.88626	5.41236	5.64197
O60343	TBC1D4	TBC1 domain family member 4	4	5.54551	5.26592	5.84201	5.60758	5.54958	5.50934	5.23929	5.53342	5.33244	5.37202	5.39485	5.71478	5.53404	5.65194	5.48822	6.06493	5.48684	5.86729
Q99439	CNN2	Calponin-2	4	5.37608	5.39966	5.89109	5.14	5.10591	5.14794	5.31676	5.11574	5.71846	6.00333	5.6809	5.53332	5.39893	5.6067	5.61973	5.84883	5.83377	6.26286
O15371	EIF3D	Eukaryotic translation initiation factor 3 subunit D	4	5.58554	5.35343	5.46332	5.08433	5.59492	5.85761	5.63399	5.78877	5.70496	5.51674	5.66561	5.23835	5.6543	5.27128	5.68127	5.72872	5.70825	5.46862
Q8IWB7	WDFY1	WD repeat and FYVE domain-containing protein 1	4	4.96991	5.39488	5.14903	5.29135	5.41006	5.66755	5.86144	6.10446	5.85929	5.46832	5.63785	4.95986	5.17861	5.94242	5.51698	5.53275	5.20156	6.85368
P29590	PML	Protein PML	4	5.34038	5.33812	5.55466	5.49448	5.33714	5.36397	5.64817	5.27398	5.25833	5.86371	5.69874	5.70741	5.64056	5.79168	5.91848	5.52479	5.49059	5.75481
P20810-6	CAST	Isoform 6 of Calpastatin	4	5.32231	5.57753	5.59074	5.30662	5.43812	4.99728	5.29723	5.60113	5.26617	5.40765	6.01991	5.80085	5.73931	5.61899	5.58925	6.45028	5.37508	5.60156
Q12874	SF3A3	Splicing factor 3A subunit 3	4	5.55478	5.15448	5.40003	5.63062	5.76621	5.55621	5.16479	5.53899	5.83258	5.61915	5.2433	5.30901	5.92876	5.76073	5.7732	5.99851	5.00684	5.76182
Q969Y2-2	GTPBP3	Isoform 2 of tRNA modification GTPase GTPBP3, mitochondrial	4	5.75939	5.15475	6.1052	5.76393	5.1089	5.6785	5.62316	5.14473	5.32649	5.48316	5.83171	5.23292	5.46918	5.18254	5.6106	5.75888	5.93742	5.82853
Q4G0J3-3	LARP7	Isoform 3 of La-related protein 7	4	5.40811	5.6007	5.69857	5.87766	5.62855	5.31944	5.4198	5.63427	5.40823	5.66543	5.39885	5.39062	5.805	5.48009	5.87686	5.44814	5.29818	5.6415
P21912	SDHB	Succinate dehydrogenase [ubiquinone] iron-sulfur subunit, mitochondrial	4	5.37317	4.98003	5.64343	5.80052	5.68292	5.91213	5.62223	5.46588	5.56656	5.38645	5.54053	5.63074	5.74244	5.40834	5.43526	5.68633	5.38585	5.73719
Q6UXH1-5	CRELD2	Isoform 5 of Protein disulfide isomerase CRELD2	4	5.36514	5.12652	5.9525	5.75831	5.4841	5.46589	5.80673	5.59934	5.74973	5.43927	5.30967	5.25456	5.65824	5.46043	5.61783	5.76597	5.71254	5.47323
Q8TB72	PUM2	Pumilio homolog 2	4	5.37623	6.02294	5.90164	5.72759	5.91562	5.72473	5.82424	5.65251	5.40559	5.5583	5.31188	5.35111	4.95855	5.31314	5.46569	5.85639	5.28375	5.35011
Q5T9S5	CCDC18	Coiled-coil domain-containing protein 18	4	5.99476	6.46933	5.73685	5.60938	5.38134	5.23783	5.18475	5.53792	5.38357	5.693	4.95599	5.46304	5.9118	5.30591	5.48258	5.192	5.71223	5.74773
Q8NG06	TRIM58	E3 ubiquitin-protein ligase TRIM58	4	5.82955	5.73751	5.64758	6.06132	5.75282	5.06621	5.76913	5.8875	5.52147	5.27969	5.44504	5.3411	5.44112	5.38361	5.49057	5.17889	5.69817	5.46873
Q8NHV4-3	NEDD1	Isoform 3 of Protein NEDD1	4	5.3086	5.35676	5.56596	5.43602	5.80775	5.8892	5.60392	5.76283	5.62776	5.47729	5.52207	5.67508	5.42388	5.5909	5.70924	5.50432	5.39322	5.34519
Q8TD19	NEK9	Serine/threonine-protein kinase Nek9	4	6.20223	5.43021	5.54023	5.61409	5.60651	5.64767	5.67649	5.43469	5.51725	5.41451	5.38415	5.43596	5.78837	5.48939	5.27423	5.61402	5.29853	5.63146
Q9UMZ2	SYNRG	Synergin gamma	4	5.65246	5.55709	5.01622	5.63277	5.43936	6.04473	5.31573	5.69152	5.12123	5.97439	5.25334	5.75293	5.62129	5.82566	5.2033	5.89149	5.44705	5.55944
P08133	ANXA6	Annexin A6	4	6.02811	5.759	5.26244	5.59795	5.41114	5.91313	5.40273	5.48977	5.35387	5.60926	5.1186	5.47147	5.66335	5.32323	5.53257	6.04875	5.63584	5.37877
Q9UKN8	GTF3C4	General transcription factor 3C polypeptide 4	4	5.48319	5.27325	5.65656	5.32724	5.71879	5.27303	5.74759	5.8602	5.64085	5.22205	5.82039	5.6766	5.67857	5.53695	5.0314	5.3996	5.77781	5.87593
Q86XI2-2	NCAPG2	Isoform 2 of Condensin-2 complex subunit G2	4	5.6498	5.80588	5.40851	5.30742	5.47186	5.64383	5.57474	5.90631	5.61807	5.66624	5.38138	5.4261	5.62499	5.64304	5.71565	5.47662	5.45869	5.22086
P10599	TXN	Thioredoxin	4	5.03934	6.03353	5.6049	5.68933	5.58077	6.03613	5.76505	5.51669	5.39593	5.51135	5.22069	5.57685	5.74005	6.23606	5.33823	5.92271	4.85042	4.94198
Q05655-2	PRKCD	Isoform 2 of Protein kinase C delta type	4	5.74355	5.16216	5.21639	5.87166	6.05593	5.05701	5.38517	5.70778	6.22919	5.77622	5.07314	5.45749	5.30949	5.77774	5.54474	6.03033	5.18928	5.41272
P22061-2	PCMT1	Isoform 2 of Protein-L-isoaspartate(D-aspartate) O-methyltransferase	4	5.03554	5.83873	5.71597	5.7156	5.89606	5.40012	5.81049	4.1851	5.51322	6.21234	5.73636	6.92664	5.93754	5.95553	4.97583	5.9986	4.59798	4.54833
O00159	MYO1C	Unconventional myosin-Ic	4	5.40336	5.84416	5.99144	5.57892	5.71997	5.31823	5.46033	5.84982	5.51863	5.4569	5.83949	5.64754	5.43795	5.30717	5.40124	5.53728	5.13356	5.55402
P30519	HMOX2	Heme oxygenase 2	4	5.53093	5.45768	5.52192	5.73309	5.65907	5.07486	5.91171	5.30088	5.53134	5.74881	6.11267	5.46477	5.7442	5.6936	5.59041	5.06842	5.49589	5.35974
P46020	PHKA1	Phosphorylase b kinase regulatory subunit alpha, skeletal muscle isoform	4	5.36762	5.63318	5.66995	5.3266	5.18339	5.86224	5.35698	5.45691	5.79998	5.53813	5.48981	5.58501	5.35989	5.70154	5.64319	5.63603	5.70629	5.68328
Q8IWR0	ZC3H7A	Zinc finger CCCH domain-containing protein 7A	4	5.23876	5.53057	5.70263	5.44112	5.36918	5.25392	5.65197	5.68145	5.48465	5.5748	5.69367	5.40033	5.67357	5.49012	5.86023	5.64697	5.48965	5.81642
Q6PJW8	CNST	Consortin	4	5.52644	5.77062	5.63619	5.71277	5.36606	5.55037	5.36479	5.76279	5.28521	5.55984	5.47647	5.45187	5.31472	5.61504	5.80035	5.71419	5.46985	5.62243
Q86W56	PARG	Poly(ADP-ribose) glycohydrolase	4	5.70534	5.20886	5.56449	5.48627	5.56362	5.99169	5.60838	5.40893	5.67962	5.59109	4.98811	5.67722	5.36458	5.55417	6.05267	5.4457	5.39689	5.71239
O95486	SEC24A	Protein transport protein Sec24A	4	5.52332	5.08628	5.85077	5.5251	5.58628	5.13479	5.43382	5.14557	6.13474	6.09918	5.69709	5.54159	5.46275	5.78298	5.85891	5.65614	5.19676	5.28393
O95487-3	SEC24B	Isoform 3 of Protein transport protein Sec24B	4	5.81228	5.4111	5.28592	5.55187	5.64891	5.35188	5.40926	5.64092	5.45791	5.47344	5.66466	5.3606	5.67713	5.8998	5.64088	5.36064	5.96114	5.39165
Q969N2	PIGT	GPI transamidase component PIG-T	4	5.67953	5.6512	5.79316	5.4243	5.42242	5.70387	5.59679	5.63889	5.4821	5.52164	5.67805	5.10867	5.66779	5.24091	5.16799	5.51669	5.94634	5.75966
Q68D10	SPTY2D1	Protein SPT2 homolog	4	5.35524	5.76543	5.38099	5.61561	5.49202	5.50752	5.52003	5.77779	5.50024	5.93851	5.66708	5.52527	5.33387	5.56184	5.65636	5.51939	5.40021	5.48258
Q9H0R6	QRSL1	Glutamyl-tRNA(Gln) amidotransferase subunit A, mitochondrial	4	5.52211	5.74822	5.55919	5.31838	6.09987	5.24868	5.79333	5.57734	5.60278	5.52788	5.57236	5.47038	5.47147	5.22705	5.20807	5.51838	6.00419	5.53034
O95292	VAPB	Vesicle-associated membrane protein-associated protein B/C	4	6.11444	5.19632	5.67825	5.59974	5.49933	5.78212	5.594	5.42804	5.49522	5.29765	5.60838	5.353	5.32116	5.19811	5.18833	6.04085	5.98618	5.61888
Q9P0L0-2	VAPA	Isoform 2 of Vesicle-associated membrane protein-associated protein A	4	5.3639	5.30846	5.60449	5.47708	5.53675	5.87245	5.75471	5.60027	5.539	5.2693	5.78315	5.63307	5.32639	5.32061	5.50068	5.9395	5.80555	5.36465
O94925	GLS	Glutaminase kidney isoform, mitochondrial	4	5.54724	5.29128	5.50483	5.56551	5.51179	5.39616	5.533	5.43404	5.56166	5.72636	5.7538	5.68983	5.37184	5.51665	5.41785	5.46102	6.08567	5.63146
Q9HCS7	XAB2	Pre-mRNA-splicing factor SYF1	4	5.48983	5.34556	5.27271	5.52048	5.37876	5.45021	5.54792	5.41027	5.92657	5.18948	5.6556	5.16777	5.64269	5.79382	6.04263	5.41367	6.20101	5.55101
Q14746	COG2	Conserved oligomeric Golgi complex subunit 2	4	5.60624	5.52163	5.52637	5.80354	5.46257	5.70378	5.57121	5.30198	5.12028	5.7907	5.90015	5.58133	5.36487	5.51032	5.10604	5.5021	5.8071	5.81979
Q15386	UBE3C	Ubiquitin-protein ligase E3C	4	5.6482	5.51138	5.64382	5.75075	5.79543	5.40208	5.61801	5.79479	5.61664	5.51985	5.50729	5.39446	5.62388	5.49369	5.65364	5.36432	5.21169	5.45009
Q13242	SRSF9	Serine/arginine-rich splicing factor 9	4	4.91062	5.81482	5.86579	5.73425	5.59883	5.94133	5.86978	5.06976	5.29194	5.74473	5.84354	5.63916	5.56351	5.84977	5.21588	5.79555	5.11335	5.1374
Q9HBI1	PARVB	Beta-parvin	4	5.68579	5.72909	5.5355	5.43359	5.82025	5.469	5.598	5.83683	5.38822	5.56956	5.56908	5.55119	5.50946	5.68545	5.69423	5.33477	5.13063	5.45937
Q13469	NFATC2	Nuclear factor of activated T-cells, cytoplasmic 2	4	5.51527	5.46629	5.63681	6.39561	6.14434	5.76797	5.54885	5.67087	5.67253	5.25256	4.79804	5.25558	5.89595	5.52531	5.84245	5.54651	4.95926	5.10579
Q96TA2	YME1L1	ATP-dependent zinc metalloprotease YME1L1	4	5.71134	5.58926	5.63004	5.35719	5.52148	5.29734	5.64664	5.6178	5.86915	5.31761	5.77392	5.39293	5.73765	5.17639	5.80005	5.63464	5.66329	5.26328
Q15717-2	ELAVL1	Isoform 2 of ELAV-like protein 1	4	5.47984	5.55254	5.63288	5.57711	5.29008	5.49836	5.51108	5.7749	5.37645	5.29087	5.54065	5.56919	5.41188	5.70217	5.65907	5.67689	5.7131	5.74293
Q9P2E3	ZNFX1	NFX1-type zinc finger-containing protein 1	4	5.74073	5.11868	5.59647	5.56695	5.64548	5.35238	5.55147	5.52026	5.84819	5.443	5.42073	5.73303	5.68463	5.46455	5.68113	5.35108	5.73674	5.5445
Q8IVS2	MCAT	Malonyl-CoA-acyl carrier protein transacylase, mitochondrial	4	5.26832	5.57013	5.65557	5.91803	5.48	5.3916	6.08721	5.67658	5.21346	5.58374	5.51881	5.44838	5.27552	5.41298	5.58269	5.61573	5.42916	5.8721
P55199	ELL	RNA polymerase II elongation factor ELL	4	5.44277	5.56403	5.71382	5.5547	5.54154	5.26091	5.74138	5.92732	5.29573	5.42613	5.72926	5.50794	5.72497	5.34952	5.37146	5.35527	5.83984	5.65342
Q9NWH9	SLTM	SAFB-like transcription modulator	4	5.82135	5.73784	5.3305	5.75974	5.21435	5.22268	5.56469	6.0863	5.47118	5.58032	5.31795	6.25913	5.12558	5.08278	5.39402	5.43934	6.21226	5.37998
Q9Y6V7	DDX49	Probable ATP-dependent RNA helicase DDX49	4	5.27883	5.59538	5.72599	6.09857	5.52128	5.38068	5.39697	5.48654	5.51725	5.58726	5.50322	5.82166	5.66977	5.60754	5.57514	5.58843	5.38333	5.26214
Q00169	PITPNA	Phosphatidylinositol transfer protein alpha isoform	4	5.75899	5.36755	5.56682	5.39288	5.66281	5.49241	5.58271	5.23633	5.65648	5.59586	5.70556	5.35794	5.91325	5.93836	5.53216	5.47693	5.52468	5.23829
P48739-3	PITPNB	Isoform 3 of Phosphatidylinositol transfer protein beta isoform	4	5.57535	5.41738	5.33806	5.66702	5.47834	5.83051	5.67	5.82818	5.46634	5.46048	5.40977	5.6962	5.56101	5.62698	5.62033	5.42414	5.45944	5.47048
Q9UBU7	DBF4	Protein DBF4 homolog A	4	5.44839	5.3307	5.48357	5.66435	5.42352	5.53752	5.41507	5.82936	5.6086	5.83597	5.48362	5.5777	5.45714	5.74023	5.37233	5.58995	5.72828	5.47371
Q9H6T3	RPAP3	RNA polymerase II-associated protein 3	4	5.4323	5.58652	5.64264	5.44219	5.54422	5.55252	5.65379	5.60084	5.30926	5.56997	5.7681	5.56809	5.42166	5.38864	5.4973	5.62119	5.79784	5.60292
Q8N392	ARHGAP18	Rho GTPase-activating protein 18	4	5.45748	5.36104	5.76291	5.30155	5.18449	5.70514	5.72436	5.58259	5.443	5.3023	5.70311	5.65033	5.67659	5.50413	5.53012	5.70916	5.46097	5.94071
Q9C0B1	FTO	Alpha-ketoglutarate-dependent dioxygenase FTO	4	5.55502	5.9174	6.23703	5.26347	5.66529	5.08481	5.65251	5.64241	5.3175	5.64421	5.961	6.05867	5.76445	5.12387	5.42498	5.56203	5.27671	4.84863
O14893	GEMIN2	Gem-associated protein 2	4	5.1097	6.13398	5.13287	5.53666	5.16935	5.38859	5.77411	6.61505	5.72504	5.45858	5.14073	5.64101	5.8082	5.20999	5.57387	5.38518	5.34427	5.85281
Q9UL18	AGO1	Protein argonaute-1	4	5.49857	5.70052	5.69677	5.55771	5.3232	5.56546	5.61221	5.48757	5.71181	5.55599	5.63006	5.21501	5.43574	5.51987	5.47423	5.45639	5.70703	5.85185
Q9UKV8	AGO2	Protein argonaute-2	4	5.45482	5.44105	5.1407	5.57163	5.48794	5.71178	5.57698	5.54914	5.43252	5.50634	5.67093	5.53973	5.70806	5.75013	5.51994	5.58144	5.60323	5.75365
O95881	TXNDC12	Thioredoxin domain-containing protein 12	4	5.09708	5.46001	5.62811	5.49557	5.7925	5.64204	5.77759	4.67804	5.81271	5.66464	5.75996	5.95967	5.74718	5.96619	5.61174	6.02721	5.05695	4.8228
A0A669KAY5	DUS4L-BCAP29	DUS4L-BCAP29 readthrough	4	5.70382	5.24735	5.72791	5.60498	5.54782	5.57011	5.51344	5.51645	5.49105	5.44271	5.46313	5.32606	5.49108	5.50794	5.63056	5.51937	5.84694	5.84927
O60934	NBN	Nibrin	4	5.36352	5.51747	5.69664	5.65274	5.50215	5.24664	5.56931	5.80568	5.5569	5.74044	5.48363	5.377	5.38245	5.48864	5.61578	5.67978	5.77262	5.5486
Q5T1M5	FKBP15	FK506-binding protein 15	4	5.5835	5.52761	5.86316	5.93139	5.68066	5.20699	5.42941	5.42683	5.36624	5.31452	5.62053	5.54872	5.38638	5.37485	5.59794	5.18345	6.11015	5.84767
P13010	XRCC5	X-ray repair cross-complementing protein 5	4	5.48998	5.41322	5.27367	5.32851	5.56869	5.93408	5.5114	5.95452	5.50793	5.40067	5.48187	5.5269	5.42293	5.81335	5.5954	5.86704	5.55067	5.35916
Q16576-2	RBBP7	Isoform 2 of Histone-binding protein RBBP7	4	5.35418	6.19642	5.13316	5.62255	5.70147	6.36209	5.37456	5.69937	5.33006	5.65088	5.13709	5.70677	5.70841	6.32538	5.46005	5.70571	4.35638	5.17548
Q9Y4B6	DCAF1	DDB1- and CUL4-associated factor 1	4	5.61334	6.21656	5.84187	5.76861	5.71646	6.05576	5.6799	4.94261	4.92796	5.65916	5.67588	5.09467	5.90006	5.41138	5.33891	5.49802	5.3838	5.27504
Q9Y597	KCTD3	BTB/POZ domain-containing protein KCTD3	4	5.85703	5.53668	5.50174	5.36321	5.68074	5.59462	6.00961	5.7185	5.07285	5.51455	5.64157	5.69563	5.45527	5.74728	5.67523	5.12579	5.17767	5.632
O14717	TRDMT1	tRNA (cytosine(38)-C(5))-methyltransferase	4	5.48337	5.82467	5.57235	5.36746	5.59039	5.45486	5.39283	5.50028	5.2632	5.77604	5.51349	5.72808	5.57963	5.41899	5.67758	5.69577	5.57823	5.5828
P22059	OSBP	Oxysterol-binding protein 1	4	6.0421	5.81777	5.34124	5.31096	5.05883	5.7563	5.4367	5.76899	5.49368	5.62639	5.39888	5.4569	5.562	5.80515	5.45919	5.95006	5.37982	5.33503
B4DL54	CHURC1-FNTB	Protein farnesyltransferase subunit beta	4	5.2591	6.09598	5.99483	5.48519	6.14952	5.76361	5.91401	4.85604	5.49297	5.71166	5.98726	5.21951	5.37277	6.20397	5.69449	5.13157	5.44068	4.22685
P55081	MFAP1	Microfibrillar-associated protein 1	4	5.42506	5.27833	5.97747	5.86834	5.74958	5.39716	5.45956	5.66464	5.81061	5.4256	5.65612	4.91181	5.69057	5.66279	5.44743	5.54349	5.49262	5.53884
P49407	ARRB1	Beta-arrestin-1	4	5.61975	5.6413	5.07129	5.48421	5.78657	5.46197	5.22321	5.40304	5.73242	5.85409	5.84415	6.02024	5.63147	5.05967	5.72306	5.2619	5.40536	5.77629
Q14232	EIF2B1	Translation initiation factor eIF-2B subunit alpha	4	5.51778	5.5162	5.6229	5.32553	5.51401	5.32214	5.63206	5.38498	5.83759	5.55654	5.9115	5.47722	5.86026	5.43438	5.65853	5.46643	5.68118	5.28079
Q14644	RASA3	Ras GTPase-activating protein 3	4	6.09813	5.07831	5.45336	5.48033	5.78147	5.58462	5.3356	5.53912	5.45949	5.42402	5.71165	6.25018	4.95138	6.34845	5.50685	5.1531	5.67974	5.16422
P36776	LONP1	Lon protease homolog, mitochondrial	4	5.38569	5.13652	5.39289	5.09492	5.19457	5.50996	5.25717	5.50517	5.54799	5.53216	5.51215	5.84683	5.77003	5.50201	5.76857	5.6963	6.27852	6.06857
O75419-3	CDC45	Isoform 3 of Cell division control protein 45 homolog	4	5.78153	5.63681	5.28945	5.18168	5.3225	5.58938	5.26457	5.6974	5.39917	5.74419	5.57179	5.50908	5.5887	5.66595	5.74208	5.82612	5.66554	5.52405
Q9UPN6	SCAF8	SR-related and CTD-associated factor 8	4	5.50573	6.20274	5.37984	5.89622	5.78349	5.98359	5.72991	5.54392	5.58431	5.589	5.12442	4.91747	5.5658	5.21653	5.26622	5.875	5.35727	5.47855
Q9UIG0	BAZ1B	Tyrosine-protein kinase BAZ1B	4	5.33067	5.58259	5.82282	5.67965	5.46016	5.19007	5.72242	5.51902	5.95116	5.75457	5.48603	5.61477	5.1723	5.46938	5.57115	5.59059	5.37709	5.70558
Q14289	PTK2B	Protein-tyrosine kinase 2-beta	4	5.66671	5.56066	5.69562	5.3882	5.4045	5.41319	5.70041	5.46179	5.5046	5.5145	5.49816	5.51574	5.22757	5.41015	5.56593	5.49767	6.0393	5.9353
P20839-6	IMPDH1	Isoform 6 of Inosine-5'-monophosphate dehydrogenase 1	4	5.42934	5.74044	5.53547	5.44352	5.76212	5.73563	5.83804	5.52701	5.16906	5.63734	5.45405	5.18328	5.74541	5.76931	5.73128	5.67281	5.20881	5.41708
P19404	NDUFV2	NADH dehydrogenase [ubiquinone] flavoprotein 2, mitochondrial	4	5.50909	5.40181	6.08948	5.27424	5.61143	5.54531	5.53652	4.55247	5.99664	5.49648	5.9498	5.63295	6.14723	5.65278	5.8287	5.5816	5.44487	4.7486
P06746	POLB	DNA polymerase beta	4	5.71417	5.58091	5.35846	5.41088	5.74235	5.50356	5.68653	5.47115	5.81603	5.69137	5.52198	5.44025	5.66662	5.79181	5.55399	5.44294	5.48916	5.11784
P37198	NUP62	Nuclear pore glycoprotein p62	4	5.81355	5.39447	5.60346	5.43706	6.15803	5.34144	5.98434	4.58942	5.24166	5.78901	5.47507	5.6491	5.6918	5.61777	5.9328	5.77821	5.69812	4.80468
Q96RG2-2	PASK	Isoform 2 of PAS domain-containing serine/threonine-protein kinase	4	5.84935	5.32078	5.78016	5.42886	5.35253	5.0716	5.76076	5.20291	5.59023	5.44153	5.99506	5.7497	5.8694	5.43165	5.79768	5.24196	5.51594	5.5999
Q5T1V6	DDX59	Probable ATP-dependent RNA helicase DDX59	4	5.32568	5.40902	5.55616	5.55826	5.22881	5.59379	5.77085	5.55631	5.31492	5.78738	5.46068	5.15422	5.31025	5.67718	5.75452	5.37175	6.09313	6.07706
Q96CW5	TUBGCP3	Gamma-tubulin complex component 3	4	5.69898	5.52548	5.52546	5.50253	5.50459	5.46369	5.4533	5.55149	5.64296	5.20827	5.30595	5.87061	5.94343	5.50762	5.67377	5.48315	5.71979	5.41893
Q9H8H0	NOL11	Nucleolar protein 11	4	5.28912	5.57747	5.51616	6.04705	5.37057	5.10508	5.21451	5.77919	5.13833	5.99222	5.59323	5.98682	5.55086	5.8971	5.33739	5.42039	5.56721	5.6173
Q7Z591	AKNA	Microtubule organization protein AKNA	4	5.24551	5.54484	5.12114	5.17861	5.87324	5.23243	5.48191	5.53741	5.58464	5.30143	5.73887	5.58425	5.47512	5.89418	5.02848	5.90058	6.49176	5.78561
Q6ULP2-9	AFTPH	Isoform 5 of Aftiphilin	4	5.5609	5.79721	6.41267	5.39312	5.77974	5.27201	5.35658	5.34634	5.61158	5.48112	5.81175	4.86762	5.32797	5.78645	5.58724	5.0494	5.89059	5.66772
Q9H2H8	PPIL3	Peptidyl-prolyl cis-trans isomerase-like 3	4	5.03471	6.31627	5.12799	5.51895	6.35042	5.85082	6.84314	3.45171	5.48012	6.11307	6.46002	6.3691	6.12186	5.93741	5.6326	5.3726	4.44988	3.56935
P33176	KIF5B	Kinesin-1 heavy chain	4	5.37025	5.25116	6.10977	5.37997	5.54034	5.34531	5.75699	5.28321	5.80583	5.23609	5.89436	5.54821	5.54643	5.27474	5.61816	5.36144	5.87277	5.80496
Q9UHD8	SEPTIN9	Septin-9	4	5.59078	5.7419	5.67521	5.4022	5.95745	5.42758	5.3486	5.66664	5.77432	5.4215	5.86691	5.51661	5.66092	5.36697	5.41869	5.25849	5.49103	5.41418
P61158	ACTR3	Actin-related protein 3	4	5.53274	4.97389	5.71946	5.86375	5.70165	5.84581	5.8003	4.87175	5.54216	5.82896	5.76552	5.91743	5.59172	5.42908	5.13025	5.84193	5.3447	5.29888
Q14562	DHX8	ATP-dependent RNA helicase DHX8	4	5.32934	5.4944	5.41427	5.60572	5.53436	5.54005	5.44002	5.32454	5.52447	5.78108	5.62592	5.76756	5.53348	5.66922	5.84594	5.48783	5.49133	5.59049
Q4G0F5	VPS26B	Vacuolar protein sorting-associated protein 26B	4	5.61012	5.25058	5.47257	5.29709	5.43869	5.92374	5.90569	5.66277	5.61126	5.35313	5.34721	5.3003	5.61902	5.52421	5.8158	5.747	5.45039	5.67042
Q9NV70	EXOC1	Exocyst complex component 1	4	5.70895	5.51579	5.34363	5.72239	5.75951	5.46207	5.50142	5.56561	5.45455	5.52627	5.57859	5.52881	5.49488	5.29624	5.70219	5.52817	5.77511	5.53581
Q92990	GLMN	Glomulin	4	5.4618	5.43736	5.52163	5.8335	5.9049	5.87997	5.94986	5.55493	5.3707	5.80533	5.25505	5.42345	5.24321	5.64746	5.22984	5.89291	4.841	5.74711
Q8NHQ9	DDX55	ATP-dependent RNA helicase DDX55	4	5.66594	5.73519	5.61595	5.62105	5.33653	5.40112	5.73289	5.62446	5.76662	5.20418	5.684	5.37074	5.51219	5.36798	5.4503	5.59254	5.77011	5.54818
Q7L7X3	TAOK1	Serine/threonine-protein kinase TAO1	4	5.65562	5.51988	5.38521	5.62918	5.5519	5.67938	5.42881	5.78292	5.37443	5.50817	5.43461	5.83791	5.42641	5.70049	5.57947	5.53666	5.57132	5.39763
P29597	TYK2	Non-receptor tyrosine-protein kinase TYK2	4	5.60619	5.57392	5.49841	5.28155	5.6978	5.28361	5.71033	5.76494	5.53773	5.78493	5.60249	5.57874	5.61127	5.37491	5.50798	5.39553	5.75983	5.42985
P51790-2	CLCN3	Isoform 2 of H(+)/Cl(-) exchange transporter 3	4	5.51207	5.63552	5.46295	5.69484	5.3053	5.77149	5.45073	5.78847	5.4531	5.44405	5.44217	5.73833	5.38865	5.60882	5.49479	5.57974	5.38995	5.83902
Q96S38	RPS6KC1	Ribosomal protein S6 kinase delta-1	4	5.70312	5.59989	5.24781	5.58839	5.2152	5.53529	5.50686	5.54604	5.14761	5.40033	5.1034	5.40144	5.61743	6.35288	5.23072	6.00208	5.73595	6.06554
Q8TCY9	URGCP	Up-regulator of cell proliferation	4	5.74881	5.5963	5.42264	5.2375	5.42661	6.04752	5.32292	5.80264	5.71673	5.50958	5.24727	5.84133	5.52062	5.10787	5.1717	5.91856	5.92276	5.43863
Q9BXL7	CARD11	Caspase recruitment domain-containing protein 11	4	5.33699	5.47937	5.67335	4.77217	5.66329	5.18824	5.19305	5.32332	6.03688	5.54951	5.98617	5.4498	5.78809	4.85757	5.8576	5.30122	6.62686	5.91653
O14979	HNRNPDL	Heterogeneous nuclear ribonucleoprotein D-like	4	5.3805	5.2495	5.57222	5.54453	5.62588	5.6035	5.61046	5.6108	5.56117	5.63419	5.5671	5.57453	5.65727	5.81286	5.5302	5.45465	5.59727	5.41334
Q8TAA5	GRPEL2	GrpE protein homolog 2, mitochondrial	4	5.34291	6.00675	5.26098	5.84518	5.48449	5.72553	5.3151	6.28281	5.19971	5.95729	5.07158	5.60424	5.10282	5.85226	5.31473	5.61046	5.14472	5.87846
Q14156	EFR3A	Protein EFR3 homolog A	4	5.48642	5.68087	5.80176	5.54319	5.61238	5.43997	5.41042	5.61993	5.6007	5.75086	5.52157	5.60182	5.13365	5.42414	5.38421	5.33333	5.84705	5.80774
Q9H1H9-4	KIF13A	Isoform 4 of Kinesin-like protein KIF13A	4	5.58964	5.5942	5.32959	6.03631	6.01593	6.07074	5.80951	5.23991	5.21888	5.49354	5.49386	5.08844	5.26715	5.22012	5.39116	5.51517	5.69013	5.93572
Q9UHR5	SAP30BP	SAP30-binding protein	4	5.42539	5.62158	5.82937	5.58221	5.83843	5.34893	5.7153	5.39034	5.95083	5.14213	5.50921	5.2239	5.47753	5.53847	5.5575	5.16186	6.15145	5.53558
Q00653	NFKB2	Nuclear factor NF-kappa-B p100 subunit	4	5.61298	5.28811	5.57396	5.42968	5.50667	5.51611	5.44486	5.32188	5.63571	5.94722	5.45158	5.56876	5.61656	5.68363	5.58914	5.75725	5.42077	5.63515
P11182	DBT	Lipoamide acyltransferase component of branched-chain alpha-keto acid dehydrogenase complex, mitochondrial	4	5.24196	5.3735	5.57665	5.6473	5.62521	5.70136	5.50293	5.55088	5.57036	5.73691	5.52966	5.53687	5.28137	5.74597	5.63877	5.62677	5.59039	5.52316
Q9Y448	KNSTRN	Small kinetochore-associated protein	4	5.16187	5.15275	6.06643	5.34874	5.28697	4.96493	5.97719	5.54042	6.22146	5.49117	5.89912	5.57578	6.01401	5.76937	6.02948	5.24288	5.23591	5.02153
P23258	TUBG1	Tubulin gamma-1 chain	4	6.06428	5.6197	6.01079	5.69657	5.64825	5.64003	5.61026	5.16469	6.02198	4.76612	5.25168	5.10999	5.74249	5.73185	5.532	5.71201	5.59679	5.08052
Q12907	LMAN2	Vesicular integral-membrane protein VIP36	4	5.85574	5.83196	5.53627	5.59674	5.53145	5.91757	5.52933	5.29758	5.38747	5.67932	5.38655	5.62259	5.39376	5.15909	5.47336	5.49976	5.85494	5.44653
Q9BV86	NTMT1	N-terminal Xaa-Pro-Lys N-methyltransferase 1	4	5.4459	5.48234	5.58956	5.68651	5.28793	5.72725	5.51496	5.81563	5.8203	5.56159	5.25849	5.48737	5.60642	5.35775	5.52137	5.23969	5.81148	5.78545
P18754-2	RCC1	Isoform 2 of Regulator of chromosome condensation	4	5.6379	4.99197	5.92706	5.18902	5.95109	5.20808	5.90411	5.1633	5.95519	5.121	5.71625	5.23005	5.98436	5.2722	6.15983	4.93077	6.29457	5.36323
Q6AHZ1	ZNF518A	Zinc finger protein 518A	4	5.87816	5.55546	5.62245	5.34011	5.36485	5.56446	5.25468	5.64817	5.75392	5.69772	5.56043	5.59404	5.43695	5.49132	5.6492	5.66472	5.55288	5.37049
Q8ND04-2	SMG8	Isoform 2 of Protein SMG8	4	5.55011	5.48031	5.66871	5.50875	5.04915	5.12047	5.69515	5.59471	5.16227	5.93036	5.51007	5.98407	5.40723	5.35082	5.44241	5.59593	5.86849	6.08098
Q99523	SORT1	Sortilin	4	5.45922	5.81464	5.8575	6.06594	5.67999	5.94573	5.14437	5.6816	5.3976	5.45195	5.70156	5.39529	5.43099	5.3455	5.48969	5.86821	5.168	5.10222
O96005	CLPTM1	Cleft lip and palate transmembrane protein 1	4	5.57928	5.54438	5.61042	5.84277	5.37757	5.30141	5.42664	5.50681	5.71152	5.4049	5.52858	5.50646	5.43487	5.48166	5.96885	5.60643	5.39645	5.771
P47985	UQCRFS1	Cytochrome b-c1 complex subunit Rieske, mitochondrial	4	5.75351	5.63157	5.43505	5.70101	5.69572	5.64955	6.02552	5.53298	5.91146	5.41698	5.49233	5.14311	5.4843	5.27743	5.24111	5.32127	5.59302	5.69409
P50750-2	CDK9	Isoform 2 of Cyclin-dependent kinase 9	4	4.80747	6.07713	5.00712	5.80459	5.22546	6.16435	5.23651	6.05675	5.25719	5.85113	5.10909	5.97029	5.13668	6.22298	5.44268	5.8788	5.02057	5.73122
Q86TB9	PATL1	Protein PAT1 homolog 1	4	5.98675	5.45147	5.40126	5.52073	5.14494	6.11947	5.39601	5.40503	5.82038	5.41528	5.78663	5.41494	5.15433	5.56873	5.54707	5.48227	5.73378	5.65093
Q8IUH3	RBM45	RNA-binding protein 45	4	5.17846	5.49422	5.39786	5.44322	5.72836	5.05349	5.71872	6.07334	5.32607	5.75627	5.90084	5.85206	5.47121	5.36336	5.4467	5.23917	5.5834	5.97325
P82650	MRPS22	28S ribosomal protein S22, mitochondrial	4	5.30451	5.80971	4.93904	5.65646	5.29017	5.94579	5.59781	5.81265	5.29767	5.6279	5.48264	6.02416	5.33827	5.88503	5.43994	5.72073	5.42322	5.40433
Q659C4	LARP1B	La-related protein 1B	4	5.50125	5.49424	5.7124	5.89389	5.40691	5.44808	5.58315	5.56153	5.54965	5.51621	5.71674	5.44478	5.58742	5.31326	5.46034	5.53787	5.71497	5.55731
Q16222	UAP1	UDP-N-acetylhexosamine pyrophosphorylase	4	5.72971	5.35379	5.35263	5.67741	5.63911	5.56734	5.31353	5.67169	5.48971	5.23827	5.58473	5.71377	5.5658	5.426	5.74992	5.68635	5.58286	5.65739
P54709	ATP1B3	Sodium/potassium-transporting ATPase subunit beta-3	4	5.6756	4.86763	5.77178	5.23195	5.78574	5.33189	5.64746	5.45516	6.21143	5.1731	6.05067	5.28414	5.83153	5.26828	5.13892	5.5001	6.04643	5.72819
Q8IY22	CMIP	C-Maf-inducing protein	4	6.15036	6.09166	5.09487	5.29942	5.80357	5.36303	5.1357	5.58206	5.27605	5.70827	5.57702	5.95897	5.68813	5.85045	5.35163	5.4027	5.53239	5.13371
Q8TAD8	SNIP1	Smad nuclear-interacting protein 1	4	5.36665	6.15688	5.81166	5.32589	5.21498	5.73512	5.54447	5.59008	5.79187	5.68301	5.19809	5.37785	5.68631	5.41581	5.92823	5.2987	5.22505	5.64934
Q13137-4	CALCOCO2	Isoform 4 of Calcium-binding and coiled-coil domain-containing protein 2	4	5.45791	5.38823	5.15018	5.31387	5.45364	5.60478	4.98912	5.37696	5.07105	5.68062	5.75534	5.44826	5.46894	6.42046	6.16486	6.08214	5.37659	5.79705
Q8N573	OXR1	Oxidation resistance protein 1	4	5.42321	5.41995	5.55648	5.35662	5.16546	5.49264	5.55569	5.09595	5.62589	5.46361	5.69279	5.96261	5.62688	5.72225	5.82525	5.84962	5.46628	5.69882
Q16181	SEPTIN7	Septin-7	4	6.01054	5.1527	5.96504	5.35228	5.3312	5.2146	5.99173	5.05495	6.02017	5.42976	5.73745	5.47792	5.63775	4.91285	6.04246	5.20179	6.06345	5.40335
Q8IYK4	COLGALT2	Procollagen galactosyltransferase 2	4	5.71118	5.27536	5.31564	5.34928	5.39639	5.45079	5.68957	5.52157	5.43244	5.28809	5.89041	5.69502	5.6654	5.51969	5.78597	5.41668	5.59173	6.00477
O15381	NVL	Nuclear valosin-containing protein-like	4	5.24162	5.46122	5.87821	5.42319	6.1946	5.53396	5.48002	5.01183	5.34337	5.52958	5.49259	5.37291	6.33207	5.23024	5.49187	5.52906	5.62457	5.82911
Q15428	SF3A2	Splicing factor 3A subunit 2	4	5.41215	5.64581	5.45819	6.0804	5.52019	5.48182	5.2853	5.53226	5.36588	5.71044	5.31742	5.16035	5.5093	6.12883	5.5001	5.37748	5.85437	5.6597
Q99963-3	SH3GL3	Isoform 3 of Endophilin-A3	4	5.54557	5.16567	5.58198	5.91461	5.3149	5.9319	5.56643	5.54797	5.38262	5.52466	5.20546	5.20755	5.66844	5.80242	5.67234	5.81946	5.35273	5.79529
P83881	RPL36A	60S ribosomal protein L36a	4	5.76318	5.75782	5.42986	5.55528	5.34239	5.64206	5.44123	5.86415	5.28337	5.68106	5.40992	5.68127	5.38609	5.82727	5.3233	5.73016	5.351	5.53059
Q9C0E8-4	LNPK	Isoform 4 of Endoplasmic reticulum junction formation protein lunapark	4	5.66485	5.21318	5.59366	5.32618	5.88451	5.89363	5.74295	5.68737	5.34631	5.15558	5.61233	5.7098	5.49477	5.2524	5.49254	5.74198	5.91943	5.26852
Q8N442	GUF1	Translation factor GUF1, mitochondrial	4	5.79685	5.39111	5.38927	5.35444	5.62518	5.30538	5.77474	5.5082	5.77607	5.62334	5.51688	5.45594	5.57357	5.51984	5.80436	5.66392	5.67191	5.24899
O15145	ARPC3	Actin-related protein 2/3 complex subunit 3	4	5.36666	5.2755	5.62726	5.54198	5.50649	5.30298	5.53578	5.54192	5.8596	5.54512	5.69627	5.70408	5.57432	5.07313	5.678	5.70709	5.88324	5.5806
Q14344	GNA13	Guanine nucleotide-binding protein subunit alpha-13	4	5.70138	6.05714	5.58541	5.43312	5.42592	5.25434	5.5816	5.84141	5.68281	5.38974	5.5495	6.03376	5.1786	5.23913	5.32891	5.47606	5.45503	5.78613
O00189	AP4M1	AP-4 complex subunit mu-1	4	5.43937	5.71695	5.37578	5.80237	5.23277	5.27436	6.04413	5.24911	5.46899	5.65077	5.51863	5.34628	5.61643	5.70141	5.45284	5.66842	5.73121	5.71016
Q9UHV7	MED13	Mediator of RNA polymerase II transcription subunit 13	4	5.6081	5.41313	5.60646	5.5906	5.74453	5.57253	5.47904	5.47049	5.68447	5.27297	5.63608	5.47017	5.65527	5.37696	5.781	5.46984	5.77127	5.39709
Q04837	SSBP1	Single-stranded DNA-binding protein, mitochondrial	4	5.80116	5.85064	5.89856	5.06934	5.82581	5.92693	5.9016	6.0257	5.25599	5.58009	4.86134	5.02483	5.45425	5.70584	5.73317	5.44275	5.36264	5.27935
Q9NW08	POLR3B	DNA-directed RNA polymerase III subunit RPC2	4	5.78249	5.56467	5.56402	5.37994	5.65828	5.5548	5.58422	5.48369	5.67383	5.12098	5.66393	5.44773	5.50551	5.83005	5.81615	5.48748	5.51114	5.37109
O94842	TOX4	TOX high mobility group box family member 4	4	5.98384	6.18837	5.79462	5.68887	5.66476	5.15936	5.51668	5.24154	5.1819	5.63036	5.46842	5.28212	5.68995	5.35639	5.66235	5.46058	5.54807	5.48182
J3QR07	YTHDC1	YTH domain-containing protein 1	4	5.47489	5.77537	6.20085	5.18067	5.59077	5.66226	5.23187	5.35006	5.19353	5.14663	5.66276	6.05146	5.45648	5.1013	6.21263	5.64189	5.21278	5.85382
O15091	PRORP	Mitochondrial ribonuclease P catalytic subunit	4	6.3003	5.64308	5.65552	4.92013	5.7105	5.00108	5.72865	5.63084	5.38082	5.61713	5.71074	5.54321	6.20403	5.59271	5.19161	5.31227	5.40121	5.45617
P25398	RPS12	40S ribosomal protein S12	4	5.24876	5.71993	5.56244	5.64794	5.57408	5.81247	5.5192	5.60091	5.66008	5.73733	5.5691	5.7329	5.50439	5.88756	5.44898	5.63744	5.08643	5.05007
Q5VZL5	ZMYM4	Zinc finger MYM-type protein 4	4	5.31854	5.7495	5.38199	5.714	5.17411	5.61319	5.45841	5.5775	5.76983	5.57329	5.21216	5.86837	5.39426	5.51021	5.54196	5.65518	5.61844	5.86907
P49674	CSNK1E	Casein kinase I isoform epsilon	4	5.09551	5.36858	6.0567	5.1501	5.47685	5.6992	5.67043	5.88061	5.24817	5.8982	5.85869	5.37204	5.5159	5.32758	5.60435	4.76453	6.16594	5.84661
Q53FZ2	ACSM3	Acyl-coenzyme A synthetase ACSM3, mitochondrial	4	5.50019	5.55553	5.65032	5.49549	5.75971	5.17172	5.41365	5.87078	5.60965	5.45292	5.47644	5.55035	5.82157	5.42341	5.74271	5.50146	5.49901	5.50507
Q15833-3	STXBP2	Isoform 3 of Syntaxin-binding protein 2	4	5.41482	5.614	5.55002	5.68233	5.46835	5.36834	5.53887	5.46793	5.44368	5.55539	5.9663	5.44263	5.39279	5.2798	5.69517	5.92704	5.49606	5.69647
Q53H12	AGK	Acylglycerol kinase, mitochondrial	4	5.87715	5.42207	5.61138	5.78352	5.73729	5.41652	5.66064	5.04699	5.66174	5.50497	5.8132	5.30649	5.51469	5.52465	5.49122	5.1853	5.80497	5.63721
P05423	POLR3D	DNA-directed RNA polymerase III subunit RPC4	4	5.43471	5.6611	6.05774	5.85974	5.33445	5.62509	4.81579	5.98554	5.77679	5.10578	5.65121	5.41764	5.16426	5.58843	5.20067	5.87661	5.65721	5.78726
Q9Y333	LSM2	U6 snRNA-associated Sm-like protein LSm2	4	5.23311	5.95183	5.32576	5.17636	5.90289	5.6382	5.65972	5.31502	5.40983	5.77574	5.70128	5.69682	5.7655	5.80061	5.5288	5.72976	5.20028	5.18852
Q96BN8	OTULIN	Ubiquitin thioesterase otulin	4	5.76416	5.64269	5.67686	5.6046	5.16205	5.84456	5.1511	5.7812	5.61561	5.53282	5.37957	5.83535	5.10048	5.63238	5.34339	5.76218	5.42538	5.7456
P50583	NUDT2	Bis(5'-nucleosyl)-tetraphosphatase [asymmetrical]	4	4.76858	5.62219	5.99762	5.36134	5.27799	5.34231	5.74033	5.17421	5.36843	5.89603	5.96906	5.74762	5.42184	6.02829	5.6356	5.33295	5.42828	5.88732
Q9UGP4	LIMD1	LIM domain-containing protein 1	4	5.21182	5.3108	5.97097	5.71244	5.66313	5.74763	5.69852	4.98413	5.49703	5.6195	5.64931	5.77991	5.66947	5.42705	5.53092	5.8503	5.27551	5.40155
Q9NYP3	DONSON	Protein downstream neighbor of Son	4	5.27287	5.40046	4.9934	5.39073	5.57804	5.39617	5.31513	5.49431	5.54957	5.79037	5.89206	6.19737	5.34981	5.59392	5.98501	5.34904	5.9683	5.48344
Q9NZJ9-2	NUDT4	Isoform 2 of Diphosphoinositol polyphosphate phosphohydrolase 2	4	5.33023	5.17154	5.31856	5.18272	5.74766	5.62549	5.30577	5.45254	5.27058	5.74711	5.90662	5.56365	5.79721	5.71915	5.86818	5.83121	5.55609	5.60569
O95989	NUDT3	Diphosphoinositol polyphosphate phosphohydrolase 1	4	5.96419	5.45556	5.65745	5.93501	5.86172	5.55133	5.73821	5.69383	5.28474	5.48609	5.23345	5.45296	5.63373	5.60186	5.45718	5.39827	4.95146	5.64296
O94913	PCF11	Pre-mRNA cleavage complex 2 protein Pcf11	4	5.69938	5.45526	5.99215	5.72635	4.68049	5.50569	5.7719	4.92596	5.7001	5.55455	5.888	5.47294	5.58432	5.31664	5.51188	5.84553	5.65821	5.71066
O75934	BCAS2	Pre-mRNA-splicing factor SPF27	4	5.50778	5.43868	5.69332	5.4052	5.5862	5.46314	5.58271	5.50616	5.59586	5.73987	5.67264	5.56786	5.79263	5.81636	5.47995	5.41823	5.40075	5.33267
Q0VD83	APOBR	Apolipoprotein B receptor	4	5.89056	5.23664	5.44087	5.47615	5.84935	5.5205	5.98918	6.00339	5.32863	5.54779	5.41672	5.49844	5.31465	5.08364	5.38213	5.79446	5.40098	5.82593
Q8WTT2	NOC3L	Nucleolar complex protein 3 homolog	4	5.26555	5.72833	5.69272	5.65826	5.66245	5.60873	5.8374	5.81421	5.95186	5.55143	5.35884	5.37663	5.22546	5.36269	5.7458	5.22209	5.59459	5.34296
P43121	MCAM	Cell surface glycoprotein MUC18	4	5.77562	5.70985	5.37891	5.67126	5.61625	5.41177	5.58705	5.59322	5.39624	5.53801	5.78972	5.63482	5.52243	5.30945	5.49784	5.55639	5.42233	5.58882
Q9H1Y0	ATG5	Autophagy protein 5	4	5.67976	5.39965	5.95083	5.42362	5.70572	5.45984	5.74891	5.22716	5.78357	5.82558	5.33774	5.51322	5.50276	5.47063	5.54083	5.24504	5.69281	5.49234
Q3MIT2	PUS10	tRNA pseudouridine synthase Pus10	4	5.3741	5.51789	5.63875	5.88951	5.07061	5.38548	5.42279	5.88867	5.21559	5.61311	5.68509	5.9156	5.42461	5.56886	5.34249	5.81245	5.47349	5.76091
Q15776	ZKSCAN8	Zinc finger protein with KRAB and SCAN domains 8	4	5.82288	5.8578	6.1235	5.58607	5.12617	5.26191	5.40426	5.90354	5.3471	5.12532	5.56737	5.69794	5.69704	5.26438	5.62176	5.01484	5.49889	6.07921
Q13129	RLF	Zinc finger protein Rlf	4	5.83752	5.54397	4.89731	5.29762	5.59336	5.43602	5.72239	5.68942	5.3405	5.90202	5.50298	5.58012	5.8096	5.89788	5.35493	5.54368	5.57846	5.47222
Q9NP81	SARS2	Serine--tRNA ligase, mitochondrial	4	5.63459	5.51101	5.26376	5.46255	5.6369	5.52479	5.35285	5.21905	5.40888	5.55548	5.45588	5.72259	5.62647	5.4959	5.50539	5.94589	5.64106	6.03697
Q05519	SRSF11	Serine/arginine-rich splicing factor 11	4	5.39715	5.62287	5.73157	5.59736	5.92261	5.48897	5.90146	3.95306	5.90876	5.85514	5.95711	6.14462	5.82006	5.84298	5.86387	5.7668	5.15783	4.06775
Q5T3I0-3	GPATCH4	Isoform 3 of G patch domain-containing protein 4	4	5.55884	5.89804	5.2129	5.98402	5.35141	5.67452	5.43377	6.06232	5.02263	5.63468	4.76178	6.10174	4.88536	5.73242	5.6297	5.77638	5.32203	5.95748
Q9H074	PAIP1	Polyadenylate-binding protein-interacting protein 1	4	5.19475	5.89123	5.64508	5.56175	5.33128	5.23285	5.61881	5.40418	5.3757	5.35078	6.07223	5.61487	5.47249	5.35656	5.81383	5.36701	6.06303	5.63356
O75821	EIF3G	Eukaryotic translation initiation factor 3 subunit G	4	5.48894	5.89292	5.53055	5.34658	6.0217	5.86062	5.50649	6.02189	5.69252	5.58697	4.89292	5.44151	5.48665	5.36539	5.79525	5.54858	5.03175	5.48876
P51587	BRCA2	Breast cancer type 2 susceptibility protein	4	5.64126	6.03026	5.22451	5.8754	5.25601	5.65969	5.01809	5.91684	5.47098	5.83593	5.35681	5.77063	4.75732	5.91782	5.66577	5.70841	5.02222	5.87206
Q8WU79	SMAP2	Stromal membrane-associated protein 2	4	5.34782	5.4915	5.99523	5.44649	5.65211	5.54975	5.70796	4.95575	5.97382	5.43164	6.10837	5.70826	5.83944	5.40784	5.67607	5.49468	4.94247	5.27079
Q9H6R0	DHX33	ATP-dependent RNA helicase DHX33	4	5.72489	5.65572	6.00157	5.35971	5.66179	5.50121	5.52081	5.51535	5.91511	5.13385	5.54843	5.60558	5.29613	5.20402	5.78737	4.98173	5.82658	5.76016
P51991	HNRNPA3	Heterogeneous nuclear ribonucleoprotein A3	4	7.41957	5.74888	5.11104	5.50395	6.11296	5.55779	5.18945	5.10833	5.5	5.45727	6.23563	5.57972	5.41695	5.13216	5.12424	4.81589	6.49314	4.49302
Q9NVG8	TBC1D13	TBC1 domain family member 13	4	5.59198	5.59469	5.75586	5.4207	5.72	5.51019	5.59965	5.35895	5.51858	5.52387	5.67885	5.29895	5.62663	5.32782	5.79295	5.19945	6.0045	5.4764
Q9NZL9	MAT2B	Methionine adenosyltransferase 2 subunit beta	4	5.41162	5.61704	6.02996	5.53915	6.0947	5.92421	5.30027	5.63249	5.63754	5.08252	5.50283	5.77998	5.57509	5.24049	5.31757	5.29525	5.68246	5.33685
Q96JB5-4	CDK5RAP3	Isoform 4 of CDK5 regulatory subunit-associated protein 3	4	5.10196	5.59459	5.61827	5.92417	5.29717	5.55905	5.23511	5.60774	5.21371	5.63913	5.51395	5.62424	5.45916	5.46426	5.43244	5.78047	5.41023	6.52434
Q9Y3A4	RRP7A	Ribosomal RNA-processing protein 7 homolog A	4	5.35757	5.72764	5.68086	5.81935	5.39974	5.80468	5.50664	5.26722	5.44146	5.4335	5.56659	5.5226	5.56611	5.5424	5.59297	5.52206	5.57003	5.67857
O00267	SUPT5H	Transcription elongation factor SPT5	4	5.3602	6.53506	4.82449	6.09269	5.07169	6.37846	4.85243	6.66644	4.53612	5.88404	4.76345	5.70449	4.8053	6.64086	5.21099	6.19558	4.57433	5.90338
Q02447	SP3	Transcription factor Sp3	4	5.55321	5.73332	5.51132	5.57926	5.38532	5.49985	5.61339	5.43378	5.3341	6.05649	5.27829	5.43953	5.33474	5.7583	5.54644	5.92948	5.52119	5.49199
Q9UJS0-2	SLC25A13	Isoform 2 of Calcium-binding mitochondrial carrier protein Aralar2	4	5.17667	5.65482	5.76014	5.79349	5.45093	5.84542	5.2277	5.6528	5.71649	5.4409	5.46074	5.57475	5.68708	5.3457	5.88128	5.5423	5.17854	5.61026
O75746	SLC25A12	Calcium-binding mitochondrial carrier protein Aralar1	4	5.73057	5.44067	5.44333	5.70426	5.56207	5.88386	5.1395	5.65469	5.52329	5.5525	5.36352	5.36169	5.27631	5.60923	5.36094	5.72711	5.96852	5.69793
Q96FV9	THOC1	THO complex subunit 1	4	5.66592	5.72392	5.17428	5.49317	5.35203	5.27822	5.42036	5.44408	5.18909	5.40332	5.73447	5.35913	5.50647	5.68045	5.79659	5.88364	5.96521	5.92965
P30837	ALDH1B1	Aldehyde dehydrogenase X, mitochondrial	4	5.38032	5.69641	5.64286	5.69426	5.62303	5.87784	5.42596	5.7807	5.48786	5.41222	5.46011	5.94499	5.41471	5.69049	5.22649	5.67097	5.248	5.32277
Q96Q89-2	KIF20B	Isoform 2 of Kinesin-like protein KIF20B	4	5.81647	6.26291	5.28588	5.81015	5.28453	5.77608	5.10286	6.10525	5.19652	5.60735	5.0859	5.60052	5.40304	5.8018	5.43306	5.62373	5.24227	5.56171
Q9UBN7	HDAC6	Histone deacetylase 6	4	6.02718	5.60345	5.45502	5.59755	5.39705	5.53589	5.61137	5.63554	5.43345	4.98032	5.7018	5.65849	5.45312	5.32733	5.90979	5.49919	5.82431	5.34914
Q9H6F5	CCDC86	Coiled-coil domain-containing protein 86	4	5.97319	5.72157	5.27605	5.45979	5.66568	5.71414	5.39813	5.85102	5.74689	5.4289	5.38765	5.50987	5.49919	5.55072	5.55823	5.53827	5.34686	5.37385
O14772	FPGT	Fucose-1-phosphate guanylyltransferase	4	5.42077	5.91437	5.66219	5.26666	5.36544	5.74594	5.30527	5.56589	5.64827	5.51908	5.56196	5.49641	5.59646	5.14606	5.82516	5.50064	5.8452	5.61424
Q9NQ29	LUC7L	Putative RNA-binding protein Luc7-like 1	4	5.51238	5.66763	5.47741	5.44068	5.98179	5.69435	5.66643	5.56761	5.63246	5.5217	5.82771	5.28494	5.49023	5.30037	5.38618	5.39827	5.5951	5.55477
Q09472	EP300	Histone acetyltransferase p300	4	5.55336	5.8356	5.53204	5.4455	5.45738	5.56924	5.4431	5.39723	5.60328	5.5515	5.83128	5.72286	5.23178	5.34855	5.60293	5.61098	5.69485	5.56854
Q0JRZ9	FCHO2	F-BAR domain only protein 2	4	5.37976	5.49852	5.38927	5.56063	5.49755	5.67558	5.35131	5.43596	5.55013	5.29288	5.73266	5.84503	5.48259	5.41791	5.67976	5.66357	5.85444	5.69246
Q13287	NMI	N-myc-interactor	4	6.0616	5.48093	5.73432	5.18957	5.4029	5.48976	5.57908	5.7845	5.50525	5.33156	5.6244	5.4686	5.51017	5.37934	5.78173	5.2852	5.79976	5.59133
Q96LJ7	DHRS1	Dehydrogenase/reductase SDR family member 1	4	5.60272	5.26779	5.55594	5.27739	5.64656	5.6252	5.8115	5.80155	5.30289	5.44256	5.15613	5.66339	5.68471	5.47722	5.23924	5.71993	6.10656	5.61872
Q9BW92	TARS2	Threonine--tRNA ligase, mitochondrial	4	5.76742	5.40142	4.90998	5.50924	5.54674	5.79651	4.92102	6.07202	5.58264	5.9053	5.03455	5.49795	5.39937	5.76706	5.91277	5.88718	5.50234	5.58649
Q13464	ROCK1	Rho-associated protein kinase 1	4	4.82837	5.15368	5.61017	5.36168	5.74567	5.96444	5.56308	5.5005	5.60599	6.07879	5.45981	5.94112	5.53661	5.61483	5.38363	5.18276	5.4681	6.00078
Q70EL1	USP54	Inactive ubiquitin carboxyl-terminal hydrolase 54	4	5.68681	5.34462	5.40637	5.89571	5.92489	5.21062	5.38966	5.21174	5.34106	5.32327	5.65561	6.03582	5.67862	5.53598	5.44841	5.53917	5.67035	5.70129
P48507	GCLM	Glutamate--cysteine ligase regulatory subunit	4	5.71933	5.29005	5.9275	5.73776	5.25998	4.7375	5.81476	5.8084	5.46107	5.35709	5.68354	5.68931	5.89963	5.44997	5.80362	5.17086	5.56426	5.62538
Q9NVH2	INTS7	Integrator complex subunit 7	4	5.6528	5.47482	5.62757	5.50738	5.41173	5.09656	5.64677	5.64273	5.13095	5.11868	5.89177	5.6607	4.96067	5.24705	6.15575	5.43158	6.42998	5.91252
O75147	OBSL1	Obscurin-like protein 1	4	5.41148	5.40822	5.43399	5.33121	5.83706	5.4213	5.72834	5.57816	5.61051	5.48153	5.53913	5.53396	5.65133	5.44907	5.60546	5.39689	5.86884	5.7135
P38606	ATP6V1A	V-type proton ATPase catalytic subunit A	4	5.29645	5.82191	5.19541	6.08266	5.22064	5.97101	5.17347	5.88596	4.97569	5.83672	4.97556	5.81401	5.25791	5.99683	5.10456	6.26584	5.00846	6.11689
Q6DD88	ATL3	Atlastin-3	4	5.66927	5.40764	5.89375	5.49974	5.59719	5.99081	5.71201	5.53207	5.4928	5.76002	5.08191	5.66677	5.70541	5.3901	5.43108	5.56266	5.17501	5.43178
Q8WTS1	ABHD5	1-acylglycerol-3-phosphate O-acyltransferase ABHD5	4	5.41747	5.95183	5.26586	5.52012	5.06712	5.46734	5.21678	5.58435	5.61375	5.68384	5.66856	5.70888	5.67109	5.56184	5.38097	5.93095	5.68175	5.60749
O15270	SPTLC2	Serine palmitoyltransferase 2	4	5.07304	5.64205	5.65203	5.87246	5.22638	5.27607	5.51192	5.6536	5.80192	5.54186	5.45036	5.70819	5.2787	5.55741	5.84314	5.78174	5.5244	5.60472
Q9NYJ8	TAB2	TGF-beta-activated kinase 1 and MAP3K7-binding protein 2	4	5.62107	5.13684	5.51952	5.59656	5.86251	5.96839	5.48402	4.88656	5.3833	5.39346	5.49275	5.33341	5.68561	5.47818	6.20188	5.9163	5.59866	5.44098
Q9P0U3	SENP1	Sentrin-specific protease 1	4	5.31063	5.68766	5.35128	5.78138	5.42457	5.72588	5.44435	5.82739	5.44905	5.43862	5.44922	5.46066	5.6961	5.5262	5.57688	5.85371	5.6097	5.38674
O94986	CEP152	Centrosomal protein of 152 kDa	4	5.82269	5.25754	5.50643	5.49183	5.46337	5.67853	5.53439	5.34423	5.52976	5.75412	5.26464	5.45162	5.70504	5.331	5.16597	6.02315	6.02613	5.64956
Q13043	STK4	Serine/threonine-protein kinase 4	4	5.47908	5.27942	5.92895	5.4687	5.63217	5.30652	5.49574	5.49818	5.63347	5.46638	5.68801	5.33155	6.02506	5.41305	5.70137	5.62821	5.49662	5.52753
Q96AA3	RFT1	Protein RFT1 homolog	4	5.85344	5.72093	5.83705	5.63359	5.53321	5.00618	5.59112	6.16045	5.62755	5.82052	5.56055	5.56906	5.73165	5.08871	5.90488	4.86948	5.34894	5.14271
Q99447-3	PCYT2	Isoform 3 of Ethanolamine-phosphate cytidylyltransferase	4	5.8692	5.70988	5.09129	5.49563	5.50187	5.29988	5.74111	5.69676	5.52844	5.8388	5.3361	5.1549	5.45109	5.59688	5.73463	5.68442	5.67477	5.59433
[truncated: 4,289 more rows]
