# Supplementary material for: Large-scale characterization of drug mechanism of action using proteome-wide thermal shift assays
Source: bioRxiv preprint, doi:10.1101/2024.01.26.577428, version 4 (2024-08-14)
Supplement: Table 3 [file 577428_file04.xlsx]

## Sheet: Cell-based data
	DMSO-00001_Log2FC_Rep1	DMSO-00001_Log2FC_Rep2	AZD1152_Log2FC_Rep1	AZD1152_Log2FC_Rep2	Rosiglitazone_Log2FC_Rep1	Rosiglitazone_Log2FC_Rep2	Bafetinib_Log2FC_Rep1	Bafetinib_Log2FC_Rep2	DMSO-00002_Log2FC_Rep1	DMSO-00002_Log2FC_Rep2	AS-605240_Log2FC_Rep1	AS-605240_Log2FC_Rep2	Ibrutinib_Log2FC_Rep1	Ibrutinib_Log2FC_Rep2	MP7_Log2FC_Rep1	MP7_Log2FC_Rep2	DMSO-00003_Log2FC_Rep1	DMSO-00003_Log2FC_Rep2	Pictilisib_Log2FC_Rep1	Pictilisib_Log2FC_Rep2	Vorinostat_Log2FC_Rep1	Vorinostat_Log2FC_Rep2	GSK2656157_Log2FC_Rep1	GSK2656157_Log2FC_Rep2	DMSO-00004_Log2FC_Rep1	DMSO-00004_Log2FC_Rep2	SGI-1776_Log2FC_Rep1	SGI-1776_Log2FC_Rep2	Gandotinib_Log2FC_Rep1	Gandotinib_Log2FC_Rep2	GSK-1070916_Log2FC_Rep1	GSK-1070916_Log2FC_Rep2	DMSO-00005_Log2FC_Rep1	DMSO-00005_Log2FC_Rep2	GSK2606414_Log2FC_Rep1	GSK2606414_Log2FC_Rep2	CPI-203_Log2FC_Rep1	CPI-203_Log2FC_Rep2	Zotarolimus_Log2FC_Rep1	Zotarolimus_Log2FC_Rep2	DMSO-00006_Log2FC_Rep1	DMSO-00006_Log2FC_Rep2	Y-33075_Log2FC_Rep1	Y-33075_Log2FC_Rep2	GSK-LSD1_Log2FC_Rep1	GSK-LSD1_Log2FC_Rep2	Flavopiridol_Log2FC_Rep1	Flavopiridol_Log2FC_Rep2	DMSO-00007_Log2FC_Rep1
SLC12A2_P55011	-0.0337564	-0.101724	-0.0291032	-0.00906034	0.00258518	0.0201311	0.0278088	-0.0352129	-0.00258982	0.00653599	-0.00385517	0.00652448	0.0526347	0.0142061	0.0457717	-0.0381493	0.0126071	-0.0717782	-0.0505655	0.0253139	-0.0014413	0.000143357	0.0187622	0.0724453	-0.000143371	0.120708	0.219989	0.056471	-0.0273276	-0.0584034	-0.0396126	-0.0914734	0.0604368	-0.0134205	0.119885	0.0359265	0.0195449	0.0571891	0.0683823	-0.0320555	-0.0118763	-0.0400642	-0.175427	0.0117793	0.0166243	-0.0606613	-0.0774129	-0.0232072	-0.0300236
ZFP91_Q96JP5	-0.216623	-0.321546	-0.0368858	-0.172121	0.0315964	-0.233891	0.101321	0.281204	0.0406322	-0.0355216	0.0820608	0.0199385	0.0124964	-0.0126055	-0.139604	0.0640561	-0.45421	-0.208989	-0.110085	-0.0290253	-0.0124986	0.0375779	0.0123912	-0.0857042	-0.090766	-0.0591654	0.170822	0.170734	0.327054	0.101097	0.116434	0.0233298	-0.202553	-0.339074	-0.209354	-0.112501	-0.170093	-0.272298	-0.0678012	0.0121877	0.081978	0.284547	0.17088	0.13797	0.0712968	-0.0122916	0.173924	0.0424447	-0.152356
SLC15A4_Q8N697	0.0244636	-0.327563	0.0394636	-0.108388	0.0357344	0.172082	0.0372079	-0.118584	0.04692	0.0169971	-0.0978533	-0.0692281	-0.0171997	-0.113943	-0.0863977	0.0599907																	0.124467	0.114398	0.121455	0.0363285	-0.0493519	0.103251	0.106143	0.064545	-0.0405806	-0.0372669	-0.2279	-0.140922	-0.206279	0.0749387	-0.10342	-0.0467685	0.0277299
CDK12_Q9NYV4	-0.213181	-0.174043	0.0199445	-0.186271	-0.0202241	-0.180854	0.140542	0.455232	0.159587	0.0382555	-0.0502693	-0.0556324	-0.0638048	0.0791777	0.0200828	0.184885	-0.279692	0.00146815	0.0349083	-0.0710467	0.031858	0.145263	0.111568	0.0455205	-0.00146965	0.0187095	-0.180079	-0.0240582	-1.03054	-1.18346	-0.0304652	0.113031	-0.428203	-0.460802	-0.353397	-0.615373	-0.387875	-0.462546	-0.179207	0.0360567	0.0149947	0.311448	0.453011	0.299152	0.0304002	-0.0151522	0.176321	0.0666803	-0.233256
CDK13_Q14004	0.0536986	-0.0571904	-0.0127	-0.0446881	0.000164951	-0.0037459	0.0239706	0.160312	0.0225948	-0.00016497	0.00267036	-0.0304657	-0.0401618	0.0878824	-0.000294191	0.0613449	0.125708	0.00408593	0.00560124	-0.102574	-0.0711103	0.107689	-0.00409754	-0.0327344	0.090693	0.119125	0.0281782	-0.121913	-0.435545	-0.392523	-0.0295282	0.0655598	-0.0208122	-0.0346792	0.0370168	-0.0923486	0.0518247	-0.0129596	-0.0301324	0.0890162	0.105082	0.182811	0.0869497	0.103071	0.00534267	-0.0140961	-0.115859	-0.00536253	-0.116492
CDK2_P24941	0.0475085	-0.0541116	-0.030172	0.0162832	0.0120723	0.0634115	-0.020125	-0.0567065	-0.00595453	-0.0206998	0.00783527	-0.000715459	0.0353224	0.000715105	0.0296171	-0.0201297	0.0401249	0.00927341	-0.0190158	-0.0446073	-0.000657841	0.0243921	-0.00141629	-0.0372014	0.0208634	0.0248722	0.0347176	0.000657541	-0.0214501	0.0172806	-0.0312121	-0.0621605	0.0326618	-0.00387533	-0.0019848	0.00198208	0.00894033	0.0605968	0.0450936	-0.0384891	0.0174387	-0.010991	-0.0174982	-0.0743127	-0.0412646	0.0337131	0.0271652	-0.0197291	-0.0023574
YES1_P07947	-0.0422358	-0.0733645	-0.0137322	0.00214153	0.027511	-0.00214472	0.00471258	0.094009	0.100232	-0.0591226	-0.0267268	-0.15347	0.139671	0.236075	-0.00439327	0.0541847	0.060487	0.150449	0.0622244	0.124145	0.135596	0.00222821	0.0133313	0.000698798	-0.000699137	-0.00216617	-0.34632	-0.305906	-0.409211	-0.483822	-0.166526	-0.314531	0.0129537	0.0422294	-0.275704	-0.292885	-0.120005	0.00731383	-0.00465903	0.110854	0.0700251	0.0169347	0.0143519	-0.0140134	-0.0365483	-0.0393609	-0.0621266	0.00464403	-0.00914708
SRC_P12931-2	-0.0593943	-0.116511	-0.0416869	0.0217715	0.0517548	0.00659104	-0.00662129	-0.101047	0.0331724	-0.0818008	0.035662	0.00902828	0.118242	-0.0374134	0.0705801	-0.0395225	0.029344	0.0090065	0.0895131	0.136024	0.148676	0.00976301	-0.0442126	-0.0288559	0.000326462	-0.127087	-0.314591	0.0159264	-0.000326536	-0.110882	-0.0555608	-0.0770211	0.350845	-0.163336	-0.0379972	0.0541159	0.376546	-0.0138263	0.0118883	-0.256945	0.0506937	-0.0630331	-0.0349492	0.175199	-0.0119871	0.0188012	-0.178156	0.0562435	-0.0571119
CDK9_P50750-2	-0.143319	-0.165624	0.0342727	-0.0304187	0.0322173	-0.0700031	-0.00650692	0.0843985	0.0064777	-0.0230353	0.0518775	0.0490147	-0.0582391	0.0241192	-0.0744624	0.0602582	-0.140182	-0.00525748	-0.0201367	0.0476183	0.0986483	0.105382	0.159667	0.0564077	-0.00591237	-0.00908615	0.21409	0.195723	0.00523839	-0.112405	-0.11097	-0.0728743	-0.106204	-0.0180477	-0.0758442	-0.107152	-0.0340867	-0.0256112	-0.0282793	0.0589083	0.0502439	0.0875613	0.165104	0.213607	0.0124697	-0.0125784	0.463687	0.346301	-0.105321
LYN_P07948	-0.0781393	-0.123538	-0.0913292	-0.0221256	0.0311741	-0.0484185	0.272015	0.248192	-0.0969895	-0.0145596	0.0144141	-0.0700054	0.392086	0.408872	0.0288022	0.0416086	0.000984456	0.0384607	0.109974	0.113059	0.0572634	0.0594862	0.00301416	0.0123068	-0.0206482	-0.0341628	-0.0319329	-0.0286219	-0.000985129	-0.0296922	-0.0348193	-0.154438	0.13555	0.0326218	-0.0196354	-0.100182	-0.0420042	0.117813	-0.00205029	0.142141	0.056868	0.111374	0.0520198	-0.0730058	-0.0543918	-0.0325729	-0.00108659	0.00108578	-0.000226112
LYN_P07948-2																																	-0.0977352	0.0285915	-0.0753361	0.0759897	-0.0291696	0.0646009	0.0828616	-0.191241	0.115725	0.107496	-0.298397	-0.289015	0.206263	-0.139705	0.0981258	-0.0682185
CDK6_Q00534	0.0253029	-0.00544225	-0.0297832	-0.00576937	0.0261088	-0.00406035	-0.0217419	-0.0116912	0.0108382	-0.0490468	0.0206516	0.0162549	0.0558646	0.00648048	0.00404896	-0.0135586	0.0821828	0.0577986	-0.050421	0.0797576	0.0507544	-0.0415219	-0.0161632	0.0114333	-0.000649536	-0.030313	-0.0916628	-0.109117	-0.0192467	0.000649244	0.0174301	0.0109953	-0.00162902	-0.0211204	0.0227528	-0.0603064	0.000199887	-0.0038263	0.0221043	0.0192932	0.000779751	0.00438998	-0.00819608	-0.000199915	-0.044137	-0.0652328	0.00495205	0.0144508	-0.0272446
CDK16_Q00536-2	-0.0682999	-0.0758823	-0.00686388	-0.0395886	0.017006	0.10494	0.0488783	0.0261986	0.0612467	0.116895	0.065854	-0.0976998	0.00140969	-0.0374296	-0.0161848	-0.00141107	0.006386	-0.00641439	0.287061	0.267456	-0.0558087	-0.0315734	-0.0546252	-0.038557	-0.0537107	-0.140587	0.125682	0.145187	0.405362	0.466165	-0.0399688	0.0419676	-0.00666921	0.0237968	-0.101388	0.0743858	0.0463548	0.00663852	0.0170211	-0.0735263	-0.118848	0.101333	-0.0627073	-0.077102	-0.030887	-0.117304	0.386273	0.384202	0.1307
CDK1_P06493	0.0398671	-0.0498891	-0.000816986	0.00222569	0.030351	0.0329538	0.000816524	0.00252617	-0.0283391	-0.0112543	0.0224104	0.0135158	-0.025584	-0.0666485	-0.0196445	-0.0176686	0.0883229	0.0527714	0.0193987	-0.0226917	0.0893339	0.0112858	-0.0290235	-0.0158997	0.0645533	0.0639666	-0.121188	-0.0938616	-0.169178	-0.172882	0.00800858	-0.00805329	0.00237479	0.0233715	-0.132222	-0.00237871	0.0646961	0.00683831	-0.00333175	0.0182036	-0.0117754	0.0228877	-0.0133978	-0.0244315	0.0306547	0.0431152	-0.070904	-0.0558662	-0.0210041
CDK5_Q00535	0.0611858	-0.0394009	0.00441594	0.0462179	0.0331287	0.0494751	-0.043995	-0.137414	-0.0135746	-0.0044295	0.0862961	0.0184773	0.0239509	-0.0418461	-0.0138104	-0.0153148	0.119974	0.096554	-0.0286114	0.00621077	-0.0167224	0.0307016	-0.00623762	0.0767017	0.060738	-0.0266785	0.0759231	-0.0258307	-0.0146114	0.00797808	-0.0379045	-0.0404731	0.0248513	0.00409083	-0.109622	0.0445283	0.116836	0.0566548	-0.017153	0.0113892	-0.0338836	-0.0352077	-0.0115661	-0.0319791	-0.00410246	-0.00584285	0.126279	0.157173	0.070627
STK3_Q13188-2	0.00323484	-0.0454278	-0.0279071	0.00847862	0.0323878	0.0358233	-0.0327065	-0.0730585	0.0116396	-0.011355	0.034972	-0.00324211	-0.022929	-0.0693336	0.0509179	0.0258933	-0.0464274	0.0571667	-0.0842824	-0.0270543	0.0379484	-0.0832477	0.0360946	0.00310471	0.0719177	-0.0283673	0.0235914	-0.0487534	0.105648	-0.00311141	0.0234801	-0.0334186	-0.0198659	-0.0285321	-0.0290996	0.00557172	0.0253865	0.00476673	0.0282436	-0.013377	-0.0418697	-0.00797971	-0.00897346	0.0195346	-0.00168254	0.051418	0.00168058	0.0511641	-0.036068
STK4_Q13043	0.0580209	-0.000254045	0.012151	0.0524601	0.0312254	0.0280762	-0.0311161	-0.0750615	0.0468867	-0.0147227	-0.0399492	0.000254	-0.0492334	-0.106274	-0.0246839	0.00967805	0.075399	0.108865	0.0531469	-0.0141151	0.033268	-0.0108261	-0.0362799	-0.0184358	0.0906101	0.0418582	-0.0421268	-0.0808274	0.0747699	0.0107454	-0.0434898	-0.0383867	0.0636299	-0.0160473	-0.0314877	0.0414499	0.106049	0.070026	-0.0431519	-0.00752132	-0.0239593	-0.0417702	0.0346394	0.0364418	-0.0195823	0.0175851	-0.0274832	0.00748231	0.0639647
CDK4_P11802	-0.173497	-0.0838744	0.0392613	-0.0859494	-0.00940552	0.0093446	-0.0624703	0.105486	0.108311	-0.0474151	0.175843	0.0434569	-0.0237811	0.0161422	-0.0337245	0.0570558																	-0.0284607	0.207758	-0.195698	0.0279101	0.152122	0.103516	-0.0658789	-0.0769984	-0.0318766	-0.0663855	0.531255	0.222382	-0.156568	-0.173585	0.0374684	0.158318	-0.0307105
CDK17_Q00537-2	0.169474	-0.0342249	0.23778	-0.127994	0.177135	-0.101211	0.0878401	0.14547	-0.0852425	0.0610754	-0.0651471	-0.0964687	-0.0230307	0.0285678	0.0226688	-0.212022	0.0882389	-0.302155	0.229013	0.0869077	-0.347199	0.118939	-0.0301251	0.108511	-0.0751758	-0.121534	-0.0419821	0.144296	0.00932347	0.104097	-0.0153247	-0.00938411	-0.0563548	0.0085426	0.0234513	-0.162561	-0.00992991	-0.00126637	-0.227495	-0.188422	0.0541029	0.00126526	0.0412786	0.109754	-0.09776	-0.0680374	0.570019	0.634678	0.107415
PRKD2_Q9BZL6-3	0.0268782	0.0653244	0.0501288	0.135503	0.130072	0.158192	-0.0273884	-0.293016	-0.225368	-0.153919	0.0591861	-0.0517815	-0.164685	0.0512906	-0.0465094	-0.0558691	-0.0341556	0.146082	-0.191118	-0.148815	0.154156	0.218219	0.00458164	0.0858642	0.150417	0.266538	-0.335972	-0.296089	-0.00459623	0.0390881	-0.0646809	-0.113488	-0.131128	-0.0183759	-0.0198788	0.133432	0.268707	0.207259	-0.00560836	-0.244898	-0.192836	0.177626	-0.148264	-0.0736264	0.0496705	0.00558664	0.0490347	0.0180996	-0.00473766
STK36_Q9NRP7	0.103584	-0.143314	0.0878769	0.0677015	0.0833042	-0.0421228	-0.0460421	-0.197117	-0.000717268	-0.0610749	-0.0658992	0.0267629	0.193896	0.000716911	0.0694347	-0.0686504	0.0890553	0.230802	0.0989114	-0.185691	0.140359	0.0328924	-0.0336598	-0.0972688	0.413393	-0.125321	-0.564499	-0.379369	-0.120917	-0.285362	0.0672376	0.267783																	0.204384
PRKD3_O94806	-0.0372404	0.0682062	0.189141	-0.0179755	0.330542	0.0533958	-0.107771	0.0864797	0.012608	-0.0410191	0.184543	-0.11695	-0.0127191	0.131497	-0.0414388	-0.163957	0.212623	0.208621	0.182791	0.327471	-0.286084	0.477124	-0.186645	-0.275168	0.0351152	0.0123099	-0.668346	-0.168576	-0.140611	0.324745	-0.236859	-0.0124158	0.254537	-0.0509929	-0.0397051	-0.119184	0.0137942	0.0740506	0.159178	0.00973268	0.0688819	-0.0812408	-0.151529	-0.22689	-0.184168	-0.00979879	0.11801	0.0148642	0.0487563
RPL4_P36578	-0.714653	-0.586889	-0.0168185	-0.380195	0.0166247	-0.655817	0.212064	1.0096	0.401971	0.267775	-0.101252	-0.0267551	-0.203525	0.364807	0.0608089	0.413567	-1.12593	-0.279742	-0.333279	-0.159554	-0.113766	0.0568229	0.0446266	-0.0460512	-0.144247	-0.114746	0.351672	0.465243	0.56554	0.308677	0.171593	0.427968	-0.684105	-0.556118	-0.388286	-0.829373	-0.58068	-0.557872	-0.11857	0.150236	0.0853654	0.451466	0.643326	0.571266	0.055319	-0.0575251	0.649573	0.242056	-0.432607
KHSRP_Q92945	0.0517479	-0.0493661	-0.0122737	-0.00656649	-0.0222274	0.0220424	-0.0164551	-0.0882394	-0.00236503	0.00236116	0.0315022	0.0221742	0.00874732	-0.0153818	0.0116643	0.00467935	0.0314593	-0.0182816	0.000316121	0.0168923	-0.0148478	-0.0363197	-0.0341536	-0.0312029	0.0115384	0.00296466	-0.00031619	0.0396458	-0.0349265	-0.00772376	0.0343691	0.0422232	0.0119516	0.011519	0.0167224	0.0215958	0.064395	-0.01278	-0.00691079	-0.0584368	-0.0278005	0.0148804	-0.0308457	-0.00556421	0.00149808	-0.00149963	-0.00366351	0.0243803	-0.0112535
KHSRP_M0R3J3
FUBP3_Q96I24	-0.0948673	-0.124791	-0.011401	-0.0130232	0.0113116	0.0199107	-0.0403154	-0.0300928	0.0536736	0.0608567	0.0800174	0.0579052	-0.0274314	0.0231304	-0.0377852	0.055084	-0.0887784	-0.104359	-0.0205789	-0.102925	0.00336171	0.120096	0.0298475	-0.0111706	-0.00336956	0.00786569	0.0634368	0.0542203	-0.108017	-0.103962	0.108611	0.0193325	-0.000304099	-0.0231476	-0.0754807	-0.0422537	-0.0115823	0.0154568	-0.0812373	-0.0631965	-0.0745271	0.0204726	0.0616698	0.0677264	0.000304035	0.012427	0.087096	0.170699	0.0621223
FUBP1_Q96AE4-2	0.0291586	-0.0846315	-0.00575417	-0.00621216	-0.0403361	0.0187164	0.00068629	-0.0614999	0.0176313	0.0306523	0.0346113	0.0147088	-0.000686616	-0.0156006	0.0314481	-0.00518535	0.0450289	0.00282827	0.000409971	0.0290029	-0.0135925	-0.0442357	-0.0527046	-0.0647559	0.0199687	0.00598138	-0.000410087	0.0210247	-0.0115314	-0.0129601	-0.00396753	0.0106513	0.0099354	-0.00370654	0.00984618	0.014312	0.00193367	-0.0469651	-0.00896551	-0.0511715	-0.0258876	0.00716918	-0.0540456	-0.0251514	-0.00193627	0.031403	0.00278229	0.00929012	-0.00762407
FUBP1_Q96AE4	-0.00556242	-0.0211079	-0.0146466	0.049615	-0.088459	0.12187	0.00674118	-0.0602741	0.00577564	0.00554106	0.180981	0.106149	0.0149245	-0.0850801	-0.0677467	-0.00985674	-0.151029	-0.299853	-0.0834254	-0.312259	-0.00791459	0.0876773	-0.00297576	0.149522	-0.0428849	0.0761046	0.194226	0.211087	0.0440025	-0.141607	0.010253	0.00296963	0.100498	-0.0685286	0.0137746	0.0588677	-0.0459112	-0.0846981	-0.0139074	0.0412407	-0.0529071	-0.2881	0.0983839	-0.0394235	0.0225822	0.040765	0.189992	-0.024791	-0.0551603
MTMR14_Q8NCE2	0.110959	-0.0136911	0.00458866	0.0341754	0.0268116	0.024878	-0.0213368	-0.0803511	-0.0627038	0.0137019	-0.0121636	0.0300135	-0.0302316	-0.107531	-0.0046033	0.0645254	-0.0503068	-0.0128561	0.0120195	0.153442	0.160463	0.025793	-0.099491	-0.0793133	0.00817407	-0.0775369	0.0180375	-0.0964579	0.171418	0.116435	-0.00822065	-0.1034	-0.0430235	0.0224989	-0.0501885	0.0385883	0.0294664	0.0641237	-0.0749227	-0.00470286	0.00468758	-0.0614293	0.0713637	-0.0428643	0.0449867	0.0926624	-0.0564314	-0.0609406	0.179793
SLC19A2_O60779																																	-0.0134646	0.0201446	-0.417904	-0.0607427	0.00341489	0.110865	0.0949388	0.0492778	-0.0666075	-0.076319	-0.204096	-0.259501	0.0142403	0.0694523	-0.003423	0.0102525	0.117407
CLPX_O76031	-0.0731677	-0.057081	-0.0192565	-0.00575464	-0.0146012	-0.00255658	0.00825308	0.00806035	0.00255206	0.0383856	-0.00286636	0.074552	0.0158386	-0.0641174	0.00966107	0.0125187	0.0036607	-0.0458936	0.0140036	0.0329617	0.022184	-0.00826459	-0.0675263	-0.0811603	-0.0362762	0.0461914	0.0696188	0.0746188	0.0106566	-0.00367001	-0.0223219	-0.0224367	-0.00191412	-0.0319608	0.00191159	-0.0257485	0.0367963	-0.0765361	-0.032461	-0.0712585	-0.0363697	0.0707255	-0.0194015	0.0267768	0.0534793	0.0426013	0.0474277	0.0297454	-0.0775924
CACTIN_Q8WUQ7-2	0.174661	-0.0548514	0.0329133	-0.00065505	-0.0911507	0.2048	-0.226	-0.132362	0.245199	0.000654752	-0.391103	-0.00143966	-0.103119	0.0612563	0.00182289	0.102473	-0.130412	-0.0833507	0.0558845	0.0424632	-0.0169957	-0.0249274	0.0694612	-0.120742	0.0549347	-0.244518	-0.182546	-0.119584	0.0565255	0.0939055	0.0167978	0.0540132	-0.0109058	-0.0065257	-0.0892127	-0.0301018	0.161649	0.032716	-0.17073	0.00649631	-0.0582388	0.0120845	-0.123273	-0.0116913	0.119906	0.0641497	0.0242172	0.115964	0.00463336
NCL_P19338	-0.307461	-0.327239	0.00669674	-0.208644	-0.03632	-0.352405	0.0655109	0.478445	0.199922	0.107771	-0.00672797	-0.0277391	-0.13521	0.202985	0.034382	0.280697	-0.606581	-0.124893	-0.122188	-0.0480241	-0.0882182	0.0528702	0.0264896	-0.0269851	-0.0880712	-0.0849116	0.194691	0.391803	0.358016	0.272551	0.225338	0.446213	-0.362062	-0.313856	-0.305457	-0.58357	-0.366499	-0.364161	-0.109226	0.16188	0.0242005	0.289465	0.452777	0.402996	-0.00250772	0.00250336	0.365837	0.187192	-0.236325
MRPS15_P82914	-0.00338909	-0.263871	0.0823865	-0.0749308	0.091791	-0.0273149	0.0957825	0.156759	-0.0496277	-0.0957342	0.023732	0.103968	0.0486737	-0.0928918	0.00338115	-0.072671	-0.173617	-0.00402241	-0.134652	-0.126339	0.0869318	0.0669364	0.111225	0.20596	0.112045	-0.12947	0.0311052	0.0530934	0.00401122	-0.109627	-0.177958	-0.0515022	-0.022618	-0.123813	0.0571081	0.0424753	0.0825191	0.0712633	0.113572	0.0763097	-0.198421	-0.188353	0.128184	0.0157167	-0.0158898	-0.178751	-0.0595101	-0.0552358	-0.0166601
UNC119B_A6NIH7	-0.100032	-0.00657075	0.00654096	-0.0651116	0.155333	-0.152393	0.388066	0.459075	-0.049379	0.0136018	-0.0646201	0.0671164	0.117987	0.042639	-0.0366598	-0.148421	0.0074389	-0.0801456	0.0722928	0.111177	0.0134296	-0.123495	0.00866098	-0.0199385	-0.130534	-0.160075	0.0896382	0.00521407	-0.00523298	0.0738385	-0.102757	-0.105786	-0.168665	0.0837502	0.376522	0.479633	0.115413	-0.141157	0.132812	0.0154233	-0.0515959	-0.0443472	0.0936119	-0.0155899	0.0450575	-0.0630138	-0.271412	-0.140253	-0.193143
RBM42_Q9BTD8	-0.230081	-0.235055	-0.122138	-0.0607539	0.00348786	-0.122551	0.0337157	0.13574	-0.0357899	0.0524985	0.0156277	0.00901924	-0.00420099	0.104656	-0.00349631	0.102373	-0.0385761	-0.100942	-0.11176	-0.116279	0.126641	0.0448845	-0.109237	-0.226543	0.0375714	-0.217133	0.16488	0.261691	0.150967	-0.10175	0.165733	0.188187	-0.0981799	-0.0977914	-0.0409549	-0.16983	-0.161736	-0.210591	-0.0906641	0.0299697	0.00762056	0.0910628	0.192454	0.168887	0.0556439	-0.00766102	0.173767	0.0998027	0.0145043
RCC2_Q9P258	0.0671686	-0.045385	-0.00402095	0.0141429	0.0306254	0.0370215	0.00912782	-0.0669646	0.00400977	-0.0122906	-0.0205961	-0.0126084	0.00647996	-0.0259648	0.00972632	-0.0294865	0.163243	0.025475	0.0693024	0.0490228	-0.0120651	-0.00233626	0.0196515	0.0358885	0.0400095	-0.0300932	-0.0507833	-0.035146	-0.0437612	-0.0335609	-0.00552618	0.00233249	0.0550425	0.0461746	0.031682	0.0552678	0.0440277	0.049727	0.0492949	-0.00626018	-0.0341124	-0.0809637	-0.00096651	-0.0482092	0.000965863	-0.0316803	-0.0779206	-0.0418363	0.0812495
UNC45A_Q9H3U1	0.0845647	-0.0827614	0.125106	0.0626261	0.0844252	0.0767629	0.0528894	0.149842	-0.0623152	-0.0723866	-0.00114822	0.0011473	-0.0776634	-0.0306281	-0.103226	-0.034307	0.0489652	-0.0293618	0.0189443	-0.0312717	0.0780194	0.151567	0.0892324	0.110203	-0.115001	-0.032243	-0.103115	-0.10428	-2.5429e-05	-0.135337	2.54285e-05	0.0791731	0.0177917	-0.063891	0.00690929	-0.0994922	-0.0858555	-0.00694254	-0.0647708	0.148358	-0.0478607	0.0535455	0.144103	0.154818	0.0108564	-0.0541161	0.0263222	-0.0226442	-0.0152614
TAL1_P17542	-0.022487	-0.0338202	-0.0970994	-0.000706772	0.0186732	0.0177467	-0.00225296	-0.0719315	0.000706426	0.00276036	0.0347141	0.0803378	0.0673689	-0.0208605	0.0354949	-0.00378694	0.0757164	0.040222	0.000134858	-0.022412	0.0349189	-0.0908766	-0.105721	-0.0173026	-0.000134871	-0.0202455	-0.0525264	0.00497219	0.0118184	0.0241587	-0.0092778	0.0598046	0.0846596	0.0301631	0.0533873	-0.0155072	0.0153423	-0.0689709	0.0158577	-0.172341	-0.0489875	0.0741274	-0.0583912	-0.104826	0.0651956	-0.0722635	0.0209903	-0.0494503	0.005605
LYL1_P12980	-0.0157769	0.153441	-0.0414435	0.0772132	0.0156062	0.124906	-0.0940715	-0.207274	-0.046248	0.144563	-0.164127	0.247811	0.138873	-0.0750516	0.174466	-0.0426967																	-0.0507201	0.102307	0.0222329	-0.0967496	-0.0624356	0.0845222	-0.239983	0.0940417	-0.0831981	-0.0225809	0.163432	0.151562	-0.382085	-0.0945029	0.0666851	0.0253903
VKORC1L1_A0A3B3ISV4	0.104013	0.0129885	0.0471953	0.027261	0.000765784	0.0310392	-0.0415166	-0.100639	-0.119175	0.00221551	-0.0355971	0.0559508	-0.00076619	-0.06538	-0.0211731	-0.0264742	-0.0389852	-0.111692	0.00320804	0.115254	-0.142706	-0.04569	-0.067506	0.127452	0.00454262	0.148778	0.175333	0.0675251	-0.0917676	-0.00628925	-0.00321519	0.139477	-0.0656746	0.0355325	0.022819	0.00164409	0.019306	0.0938837	0.100566	-0.0924217	-0.0982041	-0.0275367	-0.04131	-0.0410347	-0.000406123	0.087503	-0.0737864	0.000406008	0.0733303
IFRD1_O00458	0.0425901	-0.177781	-0.0117388	-0.145393	0.0471336	-0.047808	0.152347	0.0827492	-0.0527163	-0.0957387	0.16822	0.230457	0.1163	-0.000433412	-0.0231569	0.000433282	-0.0861202	-0.292979	0.161285	0.267594	-0.228343	-0.271236	-0.00362618	-0.0574429	-0.0771054	0.00361709	0.266175	0.327249	0.160533	0.0467768	0.0170479	-0.049382	-0.0288646	-0.249195	-0.0197871	-0.00176914	0.0927413	-0.231362	0.11667	0.0245747	-0.12984	-0.0234	0.053438	-0.0283743	0.00176697	0.00710095	0.0706465	0.0569103	0.00515858
ZC3H4_Q9UPT8	-0.227247	-0.156819	-0.0796164	-0.134996	0.00377528	-0.207899	0.00928615	0.23464	0.101062	0.0835657	-0.0471272	-0.00378519	-0.0177681	0.0661343	0.0360901	0.0921262	-0.244722	-0.0701178	-0.0426012	0.101774	0.0413793	-0.10874	-0.0541819	-0.0589091	-0.0595441	-0.0875778	0.149872	0.210859	0.39206	0.182231	0.05257	0.295466	-0.268702	-0.175136	-0.168673	-0.305358	-0.145476	-0.206489	-0.139892	0.0351441	-0.0025821	0.178814	0.294332	0.280756	0.0821489	0.00257748	0.324076	0.129472	-0.205456
MSH6_P52701	0.185767	0.00247624	0.246484	0.0958791	0.160896	0.197742	-0.0488216	0.0116931	-0.157508	-0.259566	-0.00039828	0.00039817	-0.0693774	-0.10726	-0.287221	-0.192429	0.230208	0.120951	0.0202244	-0.07175	0.366537	0.180302	0.111138	0.0904385	0.0216743	-0.020512	-0.242149	-0.27888	-0.177465	-0.214151	-0.0693122	-0.108188	0.168137	0.211479	0.134828	0.142371	0.0136633	0.14579	0.000539845	0.174631	-0.118404	-0.108342	-0.000540047	-0.0353288	-0.0119481	-0.0047314	-0.252004	-0.257152	0.196527
MSH3_P20585	-0.0173317	-0.0603884	0.0125836	-0.0148186	0.0216381	0.0166123	-0.0183676	-0.00573712	-0.111067	-0.0763211	0.022134	0.0384814	0.0189758	-0.021991	0.0057144	0.00988847	0.0432927	-0.0941022	0.000600395	-0.0121142	-0.000600645	-0.0339279	0.0488564	0.0534308	0.00511613	-0.0908098	0.050356	0.0443816	-0.0911394	-0.101669	-0.0400084	0.00235166	0.0754029	-0.0207381	-0.0809492	0.0160654	0.097651	0.0718276	0.0210999	0.0504463	-0.108387	-0.101355	0.111216	-0.0162463	-0.0913769	-0.0817776	-0.0506468	0.0209679	0.102853
NAPRT_Q6XQN6	0.015248	-0.125869	0.0158306	-0.0123651	-0.0151751	0.0225476	0.00755279	-0.0609194	-0.0264677	0.00500007	0.00808806	0.0282145	-0.00385439	-0.021789	0.00384411	-0.00699128	0.0788967	-0.000133973	0.123626	0.0966406	-0.00467562	-0.0495713	0.00687366	-0.0519662	0.000133961	0.00337525	-0.0836678	-0.0290024	-0.0210283	0.0295944	-0.00470575	0.00869545	0.0335761	-0.00329056	0.0459122	0.0390718	0.0131632	-0.0195314	0.077816	-0.0374664	-0.0342012	-0.0101338	-0.089864	-0.0559585	0.0186847	0.0277535	0.00328307	-0.0342697	-0.0364072
POLG_A0A3B3IS91																																																	0.0694744
STRN4_Q9NRL3-3	0.0388471	0.0234	0.123107	0.0741649	-0.006915	0.0555353	-0.0376748	0.0200255	-0.0722714	0.00688202	-0.0677873	0.0466173	-0.0714742	-0.0550574	-0.02527	-0.0663987	-0.24798	0.0337329	0.230095	-0.00368272	0.0367317	-0.287877	-0.275555	-0.0827798	0.171256	0.156332	-0.122034	0.00960047	0.00367334	0.0474094	-0.0638495	-0.205583	0.119102	-0.0209283	0.0536275	-0.0610175	-0.000839355	0.0573476	-0.100734	0.0371799	-0.092307	-0.0923709	-0.0805026	0.0124567	0.00789229	0.000838867	-0.230139	0.0602468	-0.0426928
STRN_O43815	-0.0130284	-0.0825895	0.0549727	0.0342388	0.0156092	-0.00860973	-0.000815893	-0.0302188	-0.0338737	-0.014358	0.00733384	0.00354712	0.020365	0.12568	0.000815432	-0.0511746	-0.05394	-0.100223	0.0454884	-0.0333463	0.000235668	0.0480766	0.0653228	0.0604739	-0.039567	-0.000235706	0.0478732	0.0982982	-0.0270816	-0.0679393	0.0269614	-0.118321	0.0637396	0.076705	0.0296565	0.0136524	-0.035167	0.0572918	0.0174584	0.0863025	0.0406206	-0.0328155	-0.141127	-0.109343	-0.0211735	-0.0137828	-0.0638071	-0.13089	0.0247622
STRN3_Q13033	0.0277754	-0.0150338	0.0297506	0.0253067	0.0737229	-0.00778451	-0.0558661	-0.0540469	-0.0133634	0.0011562	-0.025144	-0.00824277	0.0204545	0.0339684	0.0333311	-0.00115713	0.0465351	0.0475808	-0.0103219	-0.0390334	0.0803043	-0.0296731	-0.0240286	0.0561147	-0.0780041	-0.0232855	0.00700624	0.0446569	0.0663183	0.0196287	-0.00704043	-0.0580608	0.0131421	0.0011146	-0.0553732	0.0373785	-0.0338921	0.0450067	0.00804182	-0.0184366	-0.0454865	0.00716277	-0.0167459	0.0186607	0.00503888	-0.00111546	-0.0375605	-0.0108742	0.0811618
STRN3_Q13033-2	-0.139083	0.0282228	-0.181728	0.11096	0.0373443	-0.0388881	0.00105494	-0.187486	-0.0548275	0.0449457	0.0411411	-0.0738921	-0.00105571	-0.0258504	0.0466208	0.0112743	0.065595	-0.0597213	0.264512	0.306051	-0.107707	0.0219213	0.100995	-0.0283782	-0.19029	-0.0222596	-0.0809467	0.273894	0.0268355	-0.256736	-0.161971	0.231599	-0.0883237	0.0548258	-0.262546	0.139281	-0.0114932	0.0510384	0.026581	0.0114024	-0.0513947	-0.553692	-0.0994476	0.0121568	-0.441136	0.0884291	0.123804	-0.0851653
SELENOS_Q9BQE4	-0.0942871	-0.0586076	-0.129645	0.0440029	0.0257469	0.0432506	-0.140539	-0.116368	-0.0724369	0.0524235	-0.0262148	0.07192	0.0748235	0.0438906	0.0449656	-0.0390506	0.0606521	0.000657142	-0.0302471	-0.000657441	0.053036	-0.0385049	-0.0133042	-0.0345337	0.0337308	0.018338	0.0520094	0.0324347	-0.055575	0.0485002	-0.0215053	-0.0244424	-0.0368918	0.0981216	-0.163323	0.0800626	0.104609	0.000178198	0.0548708	-0.0140262	0.096105	-0.00017822	-0.0905427	-0.0360872	0.0684843	0.117219	-0.0339104	-0.00927115	-0.0082117
POLR1A_O95602	-0.108366	-0.179305	0.0354065	-0.00305174	0.0169776	0.0124759	-0.0209274	-0.198102	-0.102785	0.0030453	-0.0431318	0.0526462	0.16847	-0.0477514	0.0755262	0.0218611	-0.107191	-0.0894879	0.00563583	0.151031	0.105951	0.0894377	0.0367294	-0.0285236	-0.0105496	-0.0821938	0.0481217	0.0606582	-0.0903135	0.0300658	-0.126272	-0.00565793	-0.00526862	-0.155936	-0.197646	-0.122648	0.00524945	-0.0904314	-0.132457	0.0320496	0.0190376	0.082787	0.0891078	0.160403	0.100757	-0.130113	0.0324672	-0.153409	-0.512117
POLR3A_O14802	0.0598271	-0.0358369	0.0368034	-0.00603945	0.0977703	0.130047	0.0244442	-0.00634232	-0.0665008	0.0250325	0.00601428	0.0227965	-0.0160585	-0.033323	-0.0467629	-0.00673615	0.00601428	0.0464317	0.121498	0.0274563	-0.00603945	-0.0535169	-0.030368	0.063519	0.03389	-0.0742489	-0.153704	0.120903	-0.26572	-0.162881	-0.0797742	0.0504963	-0.104695	-0.0143881	-0.0628361	-0.0695344	-0.00915156	-0.0574355	0.0849156	0.144549	-0.0612886	0.0488097	0.129817	0.100909	0.0123705	0.0335603	0.00909388	-0.155316	-0.00833936
C16orf58_Q96GQ5	0.0699506	-0.0690583	-0.00071881	-0.021593	-0.00201911	0.0800092	-0.0661786	-0.158565	0.0489996	0.00027637	0.000428351	0.0833132	0.0130854	-0.0578975	0.0454196	-0.000276423	0.0257003	-0.0242819	0.0297854	-0.000403134	0.0267408	0.0248584	0.0584684	0.0453281	-0.0220981	0.019301	-0.0523385	-0.119657	-0.0983953	-0.0610778	0.000403022	-0.0369961	0.0659856	0.000627514	0.0517877	0.11586	0.071682	-0.0208135	-0.0488378	-0.0364539	-0.0273573	-0.000627787	-0.00691841	0.00607826	0.00528904	0.0210964	-0.000789097	-0.0635249	0.0553453
ZFPL1_O95159	-0.149495	-0.139517	-0.0588639	-0.00567123	0.029588	-0.0895437	0.00564903	-0.048803	0.0434197	0.0823614	-0.056195	0.0985146	0.0908362	0.0829067	0.196875	-0.0175668	0.208065	0.140636	0.200455	0.146124	0.0297993	-0.135403	-0.0677628	-0.0140082	-0.00937501	0.00931448	-0.125567	-0.0436769	0.0736889	-0.0525881	-0.0253215	0.0891958	0.0411499	0.00122379	0.0420082	0.0560945	0.0952732	0.0737242	0.0140526	-0.00122483	-0.0453437	-0.077994	-0.015627	0.00353179	-0.0316716	-0.0313801	-0.0205555	-0.0544988	0.127242
EDC4_Q6P2E9	-0.00301974	-0.0464486	0.0472386	0.0657915	0.0217185	0.00695021	0.00301343	0.00955135	-0.0356447	-0.00856013	-0.0640584	-0.0740801	0.017286	-0.0185293	-0.00545985	0.046104	0.00412416	0.0901815	0.0119106	-0.000807013	0.00431814	-0.0507035	-0.00146211	0.000806562	0.00727476	-0.0473813	-0.111997	-0.0555572	-0.11706	-0.243776	0.037514	0.0412	0.0203415	0.00681696	-0.0858094	-0.00684932	-0.0381184	0.029977	-0.0109877	0.0131064	0.0301137	0.0356686	-0.0951745	-0.0893845	0.0281331	0.0197478	-0.120661	-0.212459	0.0288591
MAGED2_Q9UNF1	0.00158777	-0.144042	0.107175	-0.00996219	0.0265172	0.237818	0.143989	-0.153038	-0.152515	-0.00158952	-0.00230328	0.049894	0.244184	-0.114761	0.0275734	-0.0241116	0.0639755	0.0703612	0.189625	0.0909063	0.0334313	-0.0424485	-0.0342244	-0.171972	0.0349782	-0.16552	-0.143138	-0.141677	-0.187287	0.0388245	0.111148	-0.195039	-0.016785	-0.141057	-0.130398	0.0653887	0.178933	0.241489	-0.0100537	0.0099841	-0.221171	-0.0928511	0.103648	0.0788674	-0.0270517	-0.0316065	0.189501	0.0612823	0.169253
MAGED1_Q9Y5V3-2																																	0.0078327	-0.244161	0.230225	-0.00787545	-0.102124	0.163926	0.0897653	-0.0872715	-0.0527332	-0.0342852	0.0990577	0.310799	0.115549	-0.134627	0.097616	-0.0931303	-0.0404103
PFDN4_Q9NQP4	0.190429	0.165959	0.136589	0.0466825	-0.0202189	0.0673127	-0.0271836	-0.00434592	0.098068	-0.00329158	0.0663176	-0.0360025	0.00328409	-0.0515717	-0.171312	-0.00891819	0.132141	0.205141	-0.0844336	0.0885977	-0.106996	-0.0414556	-0.00869448	0.0974143	0.122095	-0.0176445	-0.0836333	0.0367502	-0.0891515	-0.0754684	0.00864239	0.0102899	0.0114083	-0.0242634	-0.106144	0.0201439	-0.0482544	-0.0583461	-0.0144206	0.0487071	0.00982877	-0.00324167	0.00337537	0.0172837	-0.0354077	-0.0218535	0.0032344	0.0937846	-0.0231227
TDP2_O95551-2	0.0602079	-0.0785481	0.0092912	0.000650706	0.030422	0.0436252	0.036677	-0.0489388	-0.0733085	-0.140378	0.0182479	0.0368618	-0.000651	-0.0968402	-0.107896	-0.0697758	0.21344	0.000996166	0.00289184	-0.000996855	0.0740906	0.0616941	0.0875636	-0.0166526	0.0472379	-0.0159768	-0.142481	-0.0569919	0.0443978	-0.10495	-0.0145398	-0.132752	0.11227	0.0607101	0.0983398	0.0519806	0.0548614	0.0240272	-0.0023371	0.00233332	-0.073677	-0.0448652	-0.0121199	0.0177056	-0.0975018	-0.13894	-0.124391	-0.0610649	0.0897618
INPPL1_O15357	0.130409	-0.14261	0.117428	0.0239648	0.0268802	0.0864449	-0.207787	0.0536465	-0.158994	-0.241166	0.16126	0.133815	-0.0243696	-0.102902	-0.0797489	-0.162744	-0.10234	0.0706327	-0.234426	-0.14842	0.022828	0.0128119	-0.0264238	-0.158776	0.0186362	-0.0510098	0.106831	0.0777924	-0.0129267	0.0640411	-0.301657	0.176975	0.177194	-0.0665572	0.0390073	-0.137811	-0.0537788	0.0745024	0.00991163	0.134037	-0.0099802	0.0425031	0.111009	0.0785045	-0.027069	-0.0614449	-0.0675561	-0.139655	-0.0054716
POGLUT2_Q6UW63	-0.00976408	-0.121134	0.0108376	-0.00912277	0.0459112	-0.0355275	-0.000271264	0.00725438	-0.0392658	0.0127746	0.0195747	-0.00770872	-0.0595685	0.000271213	0.0198798	0.0540344	-0.0799756	-0.0192777	0.094921	0.00679035	-0.00486625	-0.0387868	0.0252658	-0.0525944	-0.0104359	-0.130181	-0.0103359	0.078341	0.0839622	0.00484989	0.0555479	0.0353923	-0.0170732	-0.00488246	-0.0226715	-0.0139442	-0.0400916	-0.0489432	0.0482818	0.0565537	0.0639021	0.0747771	0.119453	0.004866	0.0191419	-0.0172438	0.0237452	-0.0287037	-0.0237952
IPO9_Q96P70	-0.0168179	-0.117325	0.0483343	0.00114682	-0.0121638	0.0475669	0.0387151	-0.00114773	-0.0751695	-0.00662558	0.0898143	0.101477	-0.0793103	-0.0854117	0.0118609	0.0239075	0.0423441	-0.00853465	0.0827535	-0.0207277	0.0497085	0.0325472	0.0439577	0.0186596	-0.0516522	0.00677778	-0.0790411	-0.075297	-0.146631	-0.145098	0.0739272	-0.00680977	0.0825423	-0.00105888	-0.0687204	-0.0687567	0.0623126	0.0635313	0.0551123	0.0480053	-0.0457201	0.00105811	-0.0430328	-0.04129	0.0700704	0.0876165	-0.109145	-0.0499108	-0.0022167
CDC27_P30260-2	-0.0408049	-0.0983768	-0.0230524	-0.00542768	0.0459758	-0.0193428	0.00128403	0.0300789	0.0291209	-0.00128518	0.0307044	0.0116023	-0.0106272	-0.00467319	0.0111904	0.075136	-0.119493	-0.0626056	-0.000126852	-0.0301847	0.00012684	0.0166929	0.00342769	0.028619	-0.0593096	-0.10905	0.00820547	0.0207019	0.0345712	-0.0389864	-0.00329484	0.0305057	0.0412702	-0.0118568	-0.0412486	-0.0326006	-0.0158503	0.00328733	0.00191065	0.0603509	0.00860443	0.0634861	0.0486853	0.0446594	-0.00191318	-0.0237743	-0.00580738	-0.00595096	0.0151669
CDC27_G5EA36																																	-0.114779	-0.122113	0.141307	0.0902884	-0.0308911	-0.261649	-0.066048	0.027208	-0.163601	0.137096	0.510426	0.326386	0.142479	-0.227226	-0.0218163	0.0214913
TFRC_P02786	-0.0176923	-0.0780119	-0.0309871	0.00160393	-0.0214664	0.00712157	-0.254768	-0.299706	-0.0198524	0.0376756	0.00434939	0.0493608	0.0529675	-0.00160572	0.0789012	0.0367104	0.0668082	0.00396534	0.0681559	0.0277966	-0.00330513	-0.0373843	-0.0227258	-0.0526615	0.0405941	0.00821618	-0.282117	-0.295521	-0.0300528	0.00742723	0.00329758	-0.0134629	-0.0293905	-0.000793459	-0.00210385	0.025332	0.0482304	0.0148709	-0.005835	-0.0770152	-0.0284806	0.000793023	-0.0283871	-0.00849384	0.0103893	0.0310964	0.00124893	0.0193567	0.00776817
TFR2_Q9UP52	0.0325404	0.0310652	-0.00576891	0.0265855	-0.0186714	0.00496042	-0.20588	-0.246851	-0.0373524	-0.00497753	0.00847591	0.0240902	0.039981	-0.0234599	0.0322939	-0.0117759	0.0353477	-0.0109188	0.102005	-0.00119231	0.0139953	-0.0108034	-0.0114547	-0.011792	-0.000456171	0.0447416	-0.264589	-0.17631	0.000456027	0.0601659	0.0283147	0.0485007	-0.0416631	0.0408813	-0.028905	-0.00870585	0.00155998	0.0340343	-0.03747	-0.0834963	0.0214483	-0.0200303	-0.030524	-0.00156167	0.00321203	0.0483079	0.00718341	0.0505559	0.0200069
SINHCAF_Q9NP50
EXOSC10_Q01780	0.0199863	-0.056067	0.0266825	0.0458479	-0.00535749	-0.285569	-0.620128	-0.639287	-0.0131473	-0.0478695	-0.266635	0.0656199	0.00533767	0.061622	0.251119	0.0729106	0.0980409	-0.0316428	0.239106	0.214769	0.229764	-0.151253	-0.0263077	0.0258366	-0.443197	-0.168229	0.107658	-0.114035	0.607978	0.445028	-0.259519	-0.184841	0.0774691	-0.107435	0.198923	0.10453	0.110159	0.257183	0.231163	-0.00200207	-0.107638	-0.295335	0.0019993	-0.0325771	-0.0311889	-0.0504158	0.258762	-0.0746863	-0.0329707
B3GAT3_O94766	-0.068404	-0.106831	0.00907021	0.167561	-0.0751952	-0.140425	-0.0757754	-0.0772781	0.166275	0.0991971	0.120822	0.0600328	-0.00691059	0.0398399	0.00351447	-0.00352305	-0.168681	0.0347698	-0.00779885	-0.012008	0.00945638	0.0177616	-0.00710587	-0.0371517	0.0652429	-0.0195978	0.100376	0.142292	0.00707104	-0.0607902	0.0920914	-0.0360744	-0.0156284	0.0739132	0.0238682	0.138556	0.0107589	0.000284526	-0.0509402	0.0969709	0.0519324	-0.070827	0.00160233	-0.000513676	-0.0346589	-0.000284582	-0.00434889	-0.107903	-0.0227143
FH_P07954	0.0300366	-0.0664223	-0.0242112	0.00345674	0.0531857	0.0805464	0.036093	-0.0451409	-0.0352697	-0.0368912	0.0765386	0.0699463	-0.00242627	-0.0473557	0.0024222	-0.0182576	0.047929	0.00504972	0.0295752	-0.00976687	-0.0272031	0.00165446	-0.000944607	0.00412684	0.00233	-0.00686419	0.0188705	-0.00429845	-0.00665774	0.000943989	-0.0904464	-0.124515	0.0594428	0.0626386	0.0483354	0.0772434	0.0459959	0.122318	0.0227006	0.00397949	-0.0039905	-0.0462324	-0.0616795	-0.0512977	-0.0736471	-0.0271302	-0.0632877	-0.0356672	0.0835433
TLN1_Q9Y490	0.00486144	-0.0578732	0.0208457	0.0214879	0.0261823	0.0413338	0.0307506	-0.00487788	-0.0379639	-0.0319188	0.0276704	0.00759759	-0.030457	-0.0588454	-0.0607582	-0.0431411	0.0713942	0.0320916	0.0269107	-0.0238063	0.0427682	0.00703192	0.00898554	0.0270581	-0.0065021	-0.00760528	-0.0110992	-0.0537292	-0.0663713	-0.092801	0.00647292	-0.0595871	0.0793381	0.0188773	0.000532627	0.00754126	0.0243325	0.0788043	0.0141178	0.037361	-0.0351892	-0.041405	-0.000532824	-0.0171008	-0.00555635	-0.0299861	-0.0787822	-0.0369357	0.0746767
TLN2_Q9Y4G6	-0.139304	-0.163153	0.00397695	-0.0905685	-0.0277665	0.116946	0.079446	0.249412	0.0277751	0.0156714	0.134005	-0.038961	-0.133767	-0.00398794	-0.0419429	0.0323972	-0.0573938	-0.0524887	-0.0293565	-0.0823864	0.0150639	0.0515623	0.0243519	0.0245276	-0.0314974	-0.0335893	0.0807077	0.0614179	0.0803938	-0.0399237	0.0906263	-0.0152228	0.113912	0.0236978	0.0840306	0.00853734	-0.00858816	0.106192	0.0278412	0.0768974	-0.0256287	-0.0340991	-0.0296278	0.014217	-0.00977264	-0.0239566	-0.0652843	-0.0752211	-0.149049
RPL17_P18621-3	-0.20667	-0.258032	-0.0202413	-0.149905	0.0256048	-0.425457	-0.0572864	0.352342	0.297603	0.0957018	-0.128256	-0.0469216	0.0199612	0.384704	0.165155	0.373911	-0.506081	0.0334535	-0.141416	0.104108	-0.0342477	-0.0624549	-0.0447661	-0.0687327	-0.080253	-0.14163	0.142968	0.231272	0.662547	0.474501	0.0532607	0.596423	-0.446699	-0.293905	-0.25777	-0.502308	-0.414832	-0.370001	-0.0796931	0.105469	0.0557199	0.251789	0.3684	0.295998	0.0147519	-0.0149043	0.486769	0.13116	-0.303384
TOMM70_O94826	-0.00148212	-0.0101669	0.0236959	0.0346021	0.00873898	0.0274979	0.0417433	-0.025203	-0.0316879	-0.0429157	0.00322761	0.0014806	-0.0527159	-0.0337786	-0.0314868	0.00707926	0.0766633	0.037133	0.0304403	-0.0336791	-0.00320237	0.00319528	0.00875049	0.0500058	-0.00528239	-0.0154773	0.00817291	-0.0424532	-0.0284902	-0.0553375	0.018061	-0.0753786	0.0633363	0.029783	0.0061346	0.0280383	-0.0260747	0.077394	0.0323813	0.0648396	-0.0357157	-0.0450538	0.00678671	-0.0306472	-0.0511634	-0.00616079	-0.10205	-0.0237222	0.105973
B3GALT6_Q96L58
BMP1_P13497	-0.0120643	0.0676661	-0.170264	0.224931	0.311146	0.277207	-0.0471529	-0.0664902	0.260437	-0.137125	-0.0378665	0.415975	-0.00168311	0.288134	0.00168115	-0.104651
MYBBP1A_Q9BQG0-2	-0.0201683	0.192673	-0.081281	0.0256858	0.0198902	-0.129477	-0.134886	0.157129	0.238042	0.100302	-0.148959	0.372048	-0.138542	-0.070463	-0.112419	0.0408214	-0.0894562	-0.0985715	-0.141394	-0.0241822	0.119176	0.101912	-0.0738843	0.0186489	0.0436804	-0.0298651	0.00496581	0.0238598	0.099822	-0.0942802	-0.00498296	0.0777917	-0.310916	0.0631772	-0.121394	-0.129684	-0.0369148	-0.581335	-0.212509	0.219022	0.0359938	0.362107	0.540206	0.436957	0.190102	-0.122225	0.143334	-0.234992	-0.00121853
CBR4_Q8N4T8	0.00921456	-0.10592	-0.0843829	0.0401711	-0.0827845	-0.00355392	0.00392016	-0.147194	0.075168	0.0107584	-0.0211471	-0.0352208	0.0513787	-0.00294366	0.00293767	0.0259294	0.0643473	-0.0335579	0.0229179	0.0269779	-0.000528262	-0.0840479	-0.178813	-0.0166814	-0.0139611	-0.0944585	0.000528069	0.0062001	0.0293211	0.204091	-0.118111	0.0426655	0.0825173	-0.0243442	-0.00198833	0.0427741	0.0459567	0.12596	-0.00553559	-0.0167292	0.0337451	-0.0241026	-0.0794896	-0.0246984	0.0019856	0.082184	0.101492	-0.116866	-0.0588655
WARS_P23381	-0.0130735	-0.0558083	-0.0179262	0.00337189	0.0019276	-0.0419472	0.00106633	-0.0624474	0.038664	-0.00106712	0.00794441	0.0189546	0.0574593	-0.0016594	0.0745825	-0.0110061	0.063663	0.00899225	0.0554566	0.0244329	-0.0488958	0.000574275	-0.0269011	-0.017126	0.00648398	0.00193914	-0.00146966	-0.0206693	-0.000574503	-0.0205896	0.0116154	-0.0423875	0.0317898	-0.00121864	0.0412821	0.0170199	0.00637237	0.0199363	0.0201939	0.00121761	0.0115111	-0.0597382	-0.113792	-0.0518147	-0.0239475	-0.0350806	-0.0709213	-0.031086	-0.00579481
WARS1_G3V277	0.17021	0.421306	0.157003	-0.0116473	0.0162275	0.140101	-0.0450461	0.0294366	-0.0299146	-0.00716659	0.00309794	0.0698874	-0.125843	-0.0031046	-0.117908	-0.0329406	0.0383565	0.0528325	0.0902287	0.0988131	-0.12247	0.02906	-0.0296574	-0.202753	0.267446	-0.0974077	-0.18459	-0.0553887	-0.328831	-0.106682	0.102298	0.0943065
WARS1_G3V5U1	0.289162	0.0727416	0.0293131	-0.043189	0.0742785	1.03368	-0.446796	-0.691589	-0.0734125	-0.229543	0.404785	-0.0299211	-0.206887	-0.108888	0.322161	0.0634763
WARS1_G3V227	-0.217491	-0.368147	-0.256474	0.263781	0.371435	0.246146	0.019901	-0.0201793	-0.0947099	-0.426326	0.0467596	0.139263	0.143438	-0.0829776	0.271673	-0.0911479																	0.00518164	0.0850251	-0.360534	-0.480221	-0.00520031	-0.173497	0.18819	-0.0171886	-0.0239827	0.317095	0.0720911	0.221684	-0.523805	0.153785	-0.163446	0.0342602	-0.59132
WARS1_G3V3P2	0.0128053	-0.474642	-0.414076	-0.0962506	0.312216	2.23478	0.146078	-0.298052	-0.0920757	0.0195934	0.0716536	0.237729	-0.05863	-0.01292	-0.10694	0.297636
WARS1_G3V339
CTNNA1_P35221-2	0.0113239	-0.0491759	-0.00248808	0.0218791	0.0186555	0.0210449	-0.00200052	-0.0740311	0.0244945	-0.0145026	0.000884516	-0.00199128	0.0361922	-0.00807794	0.0329689	-0.000885058	0.00735483	0.0105419	-0.034594	-0.0690332	0.00273828	-0.00274348	-0.0655475	0.0242961	0.037945	0.0288827	0.0271585	-0.021196	-0.0388989	0.0143709	-0.0304385	-0.0377428	0.0704972	0.00239973	0.0265198	0.0655849	0.0138591	0.040002	0.00248495	-0.0348871	-0.0256349	-0.0710894	-0.0706799	-0.0405211	-0.00240373	0.0085984	-0.0346082	-0.00511938	0.0558585
CTNNA2_P26232	-0.0381913	-0.13554	0.00867393	0.0390242	0.0207827	-0.0156891	-0.058697	-0.138839	0.00675294	0.0274064	-0.0067847	-0.0455415	0.0506474	-0.0793443	0.0199161	0.0127467	-0.0260353	-0.00359761	0.00720409	0.0389161	0.091317	0.00358866	0.0372379	0.0618034	0.0253579	0.043928	-0.012424	-0.0132058	-0.0575772	-0.0215536	-0.0100534	-0.0629526	0.0273076	0.0465785	0.0929455	0.0171612	0.062046	-0.0230087	0.00919687	-0.0315957	-0.0908079	0.0458864	-0.100471	-0.00925588	0.0192692	-0.135066	-0.0261543	-0.0784587	0.0952445
EFHD2_Q96C19	0.0677344	-0.0033715	-0.00935484	0.0808465	0.0241841	0.110006	-0.0596373	-0.091525	0.00145965	0.0123402	0.0110691	0.0550555	-0.055869	-0.0639608	-0.0100429	-0.00146113	0.0261026	0.0247142	0.092153	0.0332954	0.0105569	0.0305266	-0.0148113	0.0766083	-0.10347	0.00351682	-0.00518359	-0.0571837	-0.0344839	-0.00352541	-0.0206363	-0.0074377	0.00425714	0.121982	-0.195033	-0.0352089	-0.0037673	0.0850711	-0.00712094	0.128523	0.000310517	-0.0640163	0.0160806	0.0267974	-0.0466844	-0.0322875	-0.000310583	0.0737866	0.0855826
EFHD1_Q9BUP0																	-0.226025	0.0259801	-0.0279752	-0.0918241	0.0072576	-0.00729429	-0.228388	0.117796	-0.314935	-0.0122898	0.0633428	-0.137691	0.183037	0.0720693	0.0892306	0.0995356	-0.23102	-0.128539	-0.219318	0.15124	-0.0344146	-0.0237179	0.0317463	-0.307707	-0.0143849	-0.0352301	0.0960128	0.0142429	0.175647	0.216485	0.230494	0.347829	0.138681
EGLN1_Q9GZT9	0.0142508	-0.0563333	0.0895944	0.04272	0.0180185	0.0521313	-0.014393	-0.0472388	0.0599156	-0.0608842	-0.100572	-0.0589044	-0.0190271	-0.0891733	0.077587	0.0320876	0.00412182	-0.00750765	0.023111	-0.00413363	0.0106076	0.0312596	0.0331887	-0.068756	-0.0568796	0.0338386	-0.0428796	-0.0617745	-0.131788	0.0606328	-0.0120387	0.00501587	0.00708537	-0.100134	-0.0349969	0.0144756	0.0724653	0.0484141	-0.00712034	-0.0368453	0.0481279	-0.0398628	-0.0419677	-0.0279285	0.0268061	0.0112269	0.0128556	-0.0183486	0.0114123
MRPL11_Q9Y3B7	-0.131375	-0.183254	0.0223953	-0.114716	0.044666	-0.14859	0.171545	0.322013	0.0356374	0.0132259	-0.0134993	-0.0133482	-0.0829631	0.100199	-0.0203322	0.0868218	-0.309542	-0.158941	-0.0622846	-0.02579	0.0751248	0.0458127	-0.0179697	0.11157	0.0174344	-0.0833792	0.104323	0.0450853	0.15699	0.0966808	-0.0911174	-0.0176477	-0.08537	-0.0703815	0.00928616	-0.222915	-0.121138	-0.0888252	0.050221	0.182192	-0.0543738	0.0788491	0.24138	0.21988	-0.00934632	-0.0740371	0.126038	0.106964	-0.135694
RUFY1_Q96T51	-0.0367796	-0.00800452	0.0814912	-0.026536	0.0640612	0.00881303	-0.0656104	-0.0383242	0.0346516	-0.0021515	0.0432045	0.0253914	-0.0178407	0.0133758	0.0021483	-0.0139748	-0.00391326	0.02574	0.00243103	-0.0208408	0.0545801	0.00743954	0.0229464	0.130711	-0.00576653	-0.00243514	-0.0874381	-0.0282995	-0.0113849	-0.0469592	0.0755792	0.0451718	0.0485755	-0.0130822	-0.0827178	-0.0399073	-0.028606	-0.0299389	0.0152218	0.0972606	0.0129646	0.0343525	0.0731311	0.077745	-0.0319134	-0.0245418	0.0178317	-0.0996452	0.0100957
USP14_P54578	0.0590904	0.00198686	0.0280785	0.0357672	0.000463	0.0130383	-0.000463149	-0.0586216	0.00127577	-0.0254574	-0.00313896	0.00231352	-0.0304724	-0.0603646	-0.0424993	-0.0185332	0.0860634	0.0583892	0.0276017	0.0245132	0.00729625	-0.0665301	-0.00471216	0.0287133	0.00912201	-0.00595622	-0.061374	-0.0817685	-0.0541704	-0.10118	0.00469682	-0.0267312	0.0311222	0.0172684	-0.0152477	0.0137425	0.00621506	0.0540673	0.0137083	0.0658866	0.00992877	-0.00624195	-0.0435734	-0.0297914	-0.0354895	-0.0154107	-0.0729606	-0.0207367	0.0353143
RUFY3_Q7L099-3																	0.0260071	-0.0192627	0.0922956	-0.0567349	0.124552	0.0180635	-0.0316142	-0.00538154	-0.0964167	0.120929	-0.10035	0.00519182	-0.00521057	-0.0188125	0.10749	0.0498925	-0.0201844	-0.112226	-0.00939123	0.0573624	-0.0598651	0.0509928	-0.0226212	0.029241	0.0239076	0.0131084	-0.178952	0.00933049	0.0188816	0.0396787	-0.137659	-0.129276	0.131825
STRIP1_Q5VSL9	-0.0134983	-0.109179	0.0278684	0.0126919	0.0793065	0.0545959	0.154966	0.0784956	0.00470074	-0.00815275	0.103646	-0.0246096	-0.00471611	-0.129663	-0.0972335	-0.0308772	0.104649	0.0394775	-0.00330128	0.0446038	0.0287026	-0.0516805	-0.0427827	0.00329374	-0.0265782	-0.0705441	-0.0242905	0.101987	0.0333516	-0.0347478	-0.00931138	0.0146261	-0.0267822	0.0702687	-0.00919839	-0.018362	0.00577786	-0.00580109	-0.0414992	0.0995902	-0.0416303	0.151517	0.0197579	0.173147	-0.014127	0.0161045	0.0828188	-0.0264167	0.0438832
STRIP2_Q9ULQ0	-0.149441	-0.111487	0.0440105	0.135129	-0.0452838	0.167409	-0.0480242	0.0700949	-0.0653374	0.0749901	0.213136	-0.0130498	-0.11646	-0.144808	0.0796575	0.0129328	0.0200727	0.0240227	0.0511074	0.0127195	-0.0167942	-0.0676566	-0.18764	-0.0128327	0.0315459	-0.177067	-0.124845	0.04529	-0.0986629	0.0564236	-0.09642	0.0250927	0.0854098	-0.128104	0.0979367	-0.0426648	0.127768	0.110251	0.056064	-0.0536186	-0.0674529	-0.0626288	0.0954706	-0.116298	-0.0139719	0.18964	0.0138379	-0.02868	-0.000226677
ATF7_P17544-6	-0.101426	0.0235487	-0.0887535	0.0230785	0.0504795	-0.072772	0.0013781	0.0390385	0.103759	-0.101001	-0.108267	-0.00137942	0.232583	0.164795	-0.0790493	-0.114532																	0.0989194	-0.090568	-0.00415975	0.115027	-0.0374772	0.0369191	0.00229882	0.058534	0.0956073	-0.00230249	-0.161373	-0.0154669	0.0101458	-0.0777166	0.141042	-0.0890126	0.00429654
ATF2_P15336	-0.0437108	0.0892753	-0.0016481	-0.0209256	-0.0597092	0.0236428	-0.010327	0.0587937	0.00422507	-0.0498164	0.051537	-0.0014443	0.0715371	0.00144286	-0.031702	0.0372561	-0.0440709	-0.0221068	-0.116582	-0.042033	-0.018025	-0.159687	0.066679	0.0342365	-0.0957694	0.051604	0.25078	0.123244	0.000161931	0.0257714	-0.000161949	0.0558099	0.140897	0.0469335	-0.000995119	0.0405416	0.013993	-0.0396151	0.000994433	0.0598549	-0.0135648	-0.0136091	-0.164196	-0.0707633	-0.0875333	-0.0131351	0.0965592	0.0015353	-0.190398
ARID1A_O14497	-0.019974	0.00070438	0.0879844	0.109648	-0.0847413	0.0239382	0.182125	-0.000704724	-0.0168497	0.111453	0.0716873	-0.00260038	-0.0846995	-0.245853	-0.163736	0.0225972	-0.113336	0.0130228	0.0309725	0.0139756	0.0285774	-0.00616059	0.00613439	0.0215393	0.0976389	-0.02224	-0.0423284	-0.0570306	-0.0477154	-0.00949046	-0.0772142	0.0299355	0.0129964	0.00598553	0.109025	0.0348316	0.210736	-0.0518429	-0.0213682	-0.00601047	-0.209682	0.080499	-0.0569305	0.059874	0.0541285	-0.0922547	-0.0327126	-0.0504406	0.118625
ARID1B_Q8NFD5-3	-0.140442	0.20447	0.115677	-0.0301533	0.0317075	-0.2186	0.0741014	0.15034	-0.237054	-0.236878	-0.192354	0.226577	0.0110492	0.153446	-0.0111345	-0.095569
PPP1R35_Q8TAP8	0.039642	-0.137696	-0.0853714	-0.0620013	0.0379073	0.0318136	-0.0141319	-0.0631768	0.019626	-0.0655404	0.0149878	0.0524516	-0.00246475	-0.110615	0.0174881	0.00246055	-0.141017	0.000804095	-0.161042	0.0257111	-0.095116	-0.0833975	0.0853738	0.0305413	0.157265	-0.198921	-0.000804543	-0.0632746	0.0839222	0.00417963	-0.013944	0.0272655	0.0451899	0.0583435	-0.0910667	0.0438162	0.0790807	-0.0678157	-0.0698593	0.0609736	-0.0295154	-0.0529962	-0.0488038	-0.0251413	0.249648	0.474296	-0.0841703	0.0247106	0.0286268
FYCO1_Q9BQS8-4	0.0451595	-0.080596	0.0966222	0.103587	0.0164815	0.00121395	-0.0355495	-0.174914	-0.00730291	0.0841572	-0.0685248	0.00789784	-0.0270301	-0.00121497	-0.0256327	0.025249	-0.025871	0.0261096	-0.0258498	0.0203487	0.175583	0.0874897	-0.0930879	-0.010799	0.0643314	-0.0350151	-0.0441698	0.0717953	0.217962	-0.0796895	0.0107187	-0.30239	-0.100783	0.0660515	-0.0345961	0.0907329	-0.0312385	-0.0103262	0.0418031	0.0323656	-0.0140519	0.0102528	0.112099	0.0715273	0.148195	-0.0591363	-0.0866808	-0.13809	0.127434
BLOC1S4_Q9NUP1	0.0388161	-0.0540736	0.0498527	0.0715527	0.00272145	0.0331215	-0.00272659	-0.0546011	-0.0160158	-0.0289149	-0.00532042	0.0559661	0.00408543	0.018982	-0.0109758	-0.0528105	0.10231	0.0473842	-0.015564	-0.0509444	-0.0102302	0.0862909	-0.118323	0.0628798	0.021256	0.0101581	-0.0837518	-0.0714737	-0.129191	-0.0761552	0.0106305	0.013706	0.0098015	0.0402676	0.0152848	0.0158308	0.0280274	0.028007	-0.0129482	0.0463904	-0.058076	-0.100835	-0.0115135	-0.00986855	-0.026323	-0.0167096	0.0112001	-0.0210969	0.003877
NDUFA8_P51970	-0.00850697	-0.0990758	-0.0031092	0.0468528	-0.00945464	0.0105347	-0.135782	-0.194226	-0.0655807	0.00490262	0.0122867	0.00855348	0.00310251	0.0135038	0.00413635	-0.00328733	0.104679	0.0101783	0.0170497	0.0705985	0.0533596	-0.0143737	0.0425639	-0.0159436	0.0870385	-0.0102507	-0.111682	-0.068399	-0.0757807	-0.0666863	-0.0201182	0.0220596	-0.0246816	0.0439471	0.0440143	0.0258046	0.016202	-0.0378181	-0.0250949	-0.0672727	-0.00575805	0.0387746	0.00573516	-0.0494357	-0.021494	0.00889076	-0.040325	0.0334842	0.0798578
HSPA1A_P0DMV8	0.144104	0.0617081	0.0326917	0.0343134	-0.0277066	-0.0235547	0.00155687	-0.00294432	0.0739077	-0.0247468	-0.00155856	0.00308196	0.0345922	-0.0217459	-0.0363322	-0.0251861	0.00361234	0.0297997	-0.157968	-0.0545953	-0.153205	0.0301635	-0.086634	-0.0854808	0.0777733	-0.00362141	0.00600477	0.0638218	-0.0654859	-0.0871691	0.00780457	0.0185634	0.0237495	0.0179421	-0.0198923	-0.0153357	5.33931e-05	-0.0572982	-0.0065848	0.10649	0.0380241	0.0345174	-0.0115514	0.0994586	-5.33951e-05	-0.014435	-0.0268809	0.0570295	-0.02789
HSPA6_P17066	-0.000628387	-0.0616872	-0.0178497	0.00661429	0.000628113	-0.00604037	0.0397241	-0.0410244	-0.0459214	-0.00767813	0.046283	0.0573948	0.0504455	0.0202596	0.0307268	-0.000755251	0.0394112	0.0291811	-0.00282239	0.0218649	-0.0771612	-0.029407	-0.0325917	-0.0410636	0.00281688	-0.0384377	0.0796975	0.0364851	0.0182338	-0.0160476	-0.0268985	0.0397768	0.00555823	-0.0196598	-0.0480961	-0.0294317	-0.00296215	-0.0307453	0.00351967	-0.0475193	-0.0513057	0.0248649	0.031248	-0.0261976	0.040278	0.00295608	0.0174789	0.0362929	0.00219663
HSPA1L_P34931	0.0351504	0.0117602	-0.0796673	0.0531851	0.0773915	0.00335734	-0.0386425	-0.107623	0.0110837	-0.121712	-0.10072	-0.00336517	0.143485	0.0388771	-0.0184541	-0.00681253	-0.668763	0.0904974	0.0357053	-0.100898	0.0590974	0.486271	-0.0324466	0.0732841	0.0317329	-0.0982801	-0.229701	0.0334234	-0.134817	-0.428153	-0.352616	0.197808	-0.0520672	-0.264563	0.342458	0.144932	0.00131824	-0.164214	-0.0157394	0.0078098	-0.00131944	-0.0874164	0.0416457	0.333515	0.153292	0.00545805	-0.20055	-0.256336	0.0416356
HSPA5_P11021	0.15359	0.0828902	0.0151569	0.0585064	-0.0388628	0.0474372	-0.0140775	0.0160723	0.0778133	0.00261113	-0.00261587	-0.00627796	-0.00652598	-0.0489141	-0.0442901	-0.0292507	0.00513822	0.000368035	-0.0627333	-0.00636604	-0.0556332	-0.000368129	-0.0309214	-0.0327852	0.0468922	0.00996373	0.0571518	0.0453746	-0.0431388	-0.0438095	0.0453075	0.0313523	0.0254681	0.100831	0.0262773	0.0137643	0.0211696	-0.0298431	-0.0137664	-0.000787149	-0.0156059	0.104197	-0.0352649	-0.0205763	0.00078672	0.0244928	-0.00669174	-0.0210586	-0.031426
HSPA9_P38646	0.0512173	-0.0433187	0.00273745	0.00459333	-0.0196323	-0.00274266	-0.0790211	-0.138839	0.0159874	0.0191361	-0.00607417	0.0150888	0.0288539	-0.0316997	0.0288857	-0.00422083	0.0604373	0.0166581	-0.0273767	-0.00811931	-0.0179499	-0.00904935	0.000321236	-0.00112373	0.0437688	0.0475845	0.0135956	-0.000321307	-0.00209325	-0.0136572	0.0618817	0.0638422	-0.00355222	0.0302138	0.00364033	0.0421535	0.0417291	-0.00799147	-0.0068229	-0.0444993	-0.0257381	-0.00857263	-0.0282697	-0.0151116	0.0123449	0.0332548	0.014145	0.0035435	-0.00406553
HSPA8_P11142	0.0675018	-0.00955834	-0.0131042	0.00333836	-0.0444079	0.00630957	0.0137751	0.00273553	0.0344926	-0.0342729	0.00252298	-0.0025274	0.00761561	-0.0376306	-0.0205837	-0.0177691	-0.00746058	-0.0195088	-0.0808151	0.00196604	-0.0638291	0.0440271	-0.00502904	-0.0108567	-0.00196872	0.0517606	0.0942305	0.0647117	0.0226703	0.00540824	0.00434714	-0.00744895	0.000972946	0.00921832	-0.025757	-0.0313617	-0.0195851	-0.0450799	-0.00235236	0.0124092	0.0113257	0.00605721	-0.0327485	0.014347	-0.023678	0.00718845	-0.000973602	0.0201629	-0.0536293
HSPA2_P54652	-0.0665689	-0.128804	-0.0939835	0.0866834	-0.0501862	0.0905014	-0.0736973	-0.0865696	0.037167	0.0244139	0.0813739	0.0350312	-0.00927548	-0.00214397	0.00214078	0.00433506
HSPA8_E9PN89	0.174357	0.034922	-0.0153293	0.0759436	-0.0934071	0.191288	0.0683198	-0.148143	-0.0711702	-0.0318897	0.0992852	0.0199851	-0.0854162	-0.0528778	-0.000873525	0.000872997	0.156143	0.112306	0.144309	0.12441	-0.00289421	-0.110889	-0.33287	-0.342939	0.360319	-0.214754	-0.319591	0.0121935	-0.0816491	-0.0538186	0.00288842	0.353813	-0.0480213	-0.0163134	-0.0863296	-0.0397401	0.217943	-0.0299572	-0.0633925	-0.00782531	0.00778309	-0.0226481	0.436329	0.317565	0.142159	0.0662136	0.227076	0.334826
HSPA8_E9PK54	-0.176894	-0.145543	0.000820529	-0.0472927	-0.0262699	0.109864	0.0824996	0.109853	0.0136741	-0.0026901	0.0533465	0.0143936	-0.00162405	-0.0216159	-0.000820996	0.00918988	-0.359239	-0.0640094	-0.00442095	-0.136861	-0.164846	0.0369401	0.00440745	-0.141695	0.0434086	0.0222163	-0.0317637	0.287338	-0.0367029	0.0562173	0.0683257	0.192997	-0.568234	-0.0820216	-0.458541	-0.358709	-0.0784972	-0.13826	-0.131024	0.101989	0.088547	0.334228	0.44053	0.226564	0.0557462	-0.0579871	0.347172	0.317723	-0.180136
SFXN2_Q96NB2	0.000618041	-0.0656178	-0.0668663	0.0421905	-0.100026	-0.0258103	-0.0880386	-0.201897	0.0309001	0.0352072	-0.000618306	0.0191809	0.0596042	0.00154634	0.00850338	-0.0196806	-0.046845	0.050089	0.0280993	0.0759554	0.115499	0.0497721	-0.0206532	-0.00545601	0.00543545	-0.0446672	-0.0474706	-0.127605	0.0175175	-0.00556968	0.010581	-0.0175317	-0.130132	-0.00646078	0.00668503	0.10184	0.0299724	-0.0803853	0.0299746	-0.060642	0.00643198	-0.15157	0.0180037	-0.101515	0.0325549	-0.0437688	-0.0566683	0.0437808	0.127224
GADD45GIP1_Q8TAE8	-0.0769568	-0.0990568	0.00505543	-0.0535328	-0.00378675	-0.159146	-0.038461	0.0534211	0.0821607	0.0944348	0.0078983	-0.01974	-0.0615505	0.029398	0.00377684	0.0556977	-0.00223921	-0.0625463	0.0681969	0.0535933	-0.00626003	0.00223574	-0.109776	-0.075443	0.0137444	-0.0283371	-0.148278	0.0955611	0.113783	0.0811024	-0.106474	0.0285739	-0.229763	-0.0424618	-0.200325	-0.198548	-0.103904	-0.0669443	-0.0488902	0.0617912	0.0195611	0.102966	0.0940146	0.0627633	-0.00130386	0.00130268	0.136934	0.0730862	-0.0686814
DHX30_Q7L2E3-2	-0.183259	0.0476834	-0.0879515	-0.066375	0.0270782	-0.212081	-0.0408696	0.173431	0.037055	-0.113186	-0.0022615	0.0280892	0.00225796	0.0978948	-0.028105	0.0718044	-0.374747	-0.0924908	-0.16694	-0.122557	0.0387846	0.0341459	0.0394593	-0.00355455	-0.0293365	0.00354581	-0.0477494	-0.0225097	0.178322	0.084269	0.0360785	0.200638	-0.193732	-0.135432	-0.103483	-0.25965	-0.234478	-0.241183	-0.0290559	0.0549359	0.019244	0.21929	0.321333	0.310829	0.114374	0.0149604	0.197422	-0.0151172	-0.281545
PM20D2_Q8IYS1																																																	-0.232034
SPTLC1_O15269	0.0309181	-0.0818012	0.0644206	0.0322555	0.0470895	-0.0115816	0.00123696	0.0121822	-0.00604279	-0.0279777	-0.034556	0.0569401	0.0258287	-0.0276216	-0.00179374	-0.00123802	0.0579125	0.167719	-0.0108461	-0.00770801	-0.0692039	0.0468847	0.0366178	0.070285	-0.0738512	0.0646518	0.0283972	0.00766705	-0.0187519	-0.0149093	-0.054301	-0.10312	0.00888596	0.00192434	-0.0405183	0.042541	0.0511841	0.0087917	0.000142246	-0.00014226	-0.139772	-0.0913197	0.037355	0.0371747	-0.00331031	-0.0359959	-0.0680274	-0.0842623	0.0037596
CKAP5_Q14008	0.0106817	-0.0199515	0.0690315	0.0292162	0.079951	-0.0221158	0.0386433	0.122634	0.00115258	-0.0515578	-0.0126697	-0.00115351	-0.0619422	0.0185722	-0.110687	-0.0113964	0.0147923	0.035972	-0.0182053	-0.0301937	0.129843	0.097062	0.0770861	0.135894	-0.0265634	-0.0400807	-0.185608	-0.155378	-0.00282131	-0.117208	0.00281581	0.0185232	0.0165894	-0.0402254	-0.00105763	-0.0391933	-0.0341711	0.0101466	-0.0277207	0.11015	-0.0473474	0.0542976	0.160238	0.126889	0.00105686	-0.0369653	0.0311208	-0.0562725	0.0543054
TRAPPC11_Q7Z392	0.0701336	-0.125475	-0.0306644	0.0797582	-0.0419031	-0.0116959	0.0116018	0.11882	-0.0385683	-0.0357474	0.0909952	0.027347	-0.0303414	0.0325763	0.0213666	-0.0134981	0.103815	0.0636835	0.0590447	0.0255271	0.0989721	-0.0750571	-0.0145936	0.11442	0.0077912	-0.0610902	-0.189663	-0.064958	-0.0078335	-0.0866435	-0.0747046	0.0101883	0.00216006	-0.0278166	-0.0629456	-0.0178407	0.133818	0.10087	-0.0681705	0.115941	0.00642454	-0.0021633	0.0727126	0.0777212	0.0761477	-0.0221987	-0.0554447	-0.114765	0.0477125
ACAD10_Q6JQN1-5																																																	0.412865
ALDH2_P05091	-0.00352772	-0.0582055	-0.0241545	0.0302473	0.0248046	0.0915361	0.0578373	-0.0392948	-0.0583952	-0.0452352	0.0451571	-0.000296435	0.00924422	-0.00460334	0.0184102	0.000296374	0.0104126	0.0479109	0.0554753	0.0297887	0.213704	0.218565	-0.030405	-0.0104883	-0.0160452	-0.0513819	0.0284256	-0.0394512	-0.0768564	-0.0986138	0.0140333	-0.0986459	0.0632839	0.0692741	0.0641115	0.078948	0.0307069	0.100009	0.111219	-0.000911416	-0.0608076	-0.0246179	-0.0416398	-0.0342347	-0.00283767	0.00091084	-0.0381207	-0.0410487	0.0637927
ALDH1B1_P30837	0.00151348	-0.0698674	-0.00988119	0.00754928	0.0697359	0.0261184	0.077371	-0.0169765	-0.0714188	-0.0850906	-0.00538874	-0.0119249	0.0638733	-0.00151507	0.071524	0.00183032	0.12617	0.0340245	0.0589707	0.0641978	0.258295	0.302728	-0.019428	-0.016823	-0.071403	-0.00167153	0.114696	0.0016696	-0.0212315	-0.0289545	-0.107971	-0.118224	0.0517143	0.0591362	-0.002199	0.0464887	0.0330439	0.0949663	0.0566717	0.00219565	-0.0956758	-0.133878	-0.0798026	-0.0552409	0.022218	-0.00359567	-0.122012	-0.0635431	0.0308347
ALDH1A2_O94788	0.0289798	-0.0448498	-0.0106257	0.00114505	0.0215566	0.0368874	0.0406689	-0.00707049	-0.0212178	-0.0198334	-0.00114596	-0.0310574	0.106775	0.094684	0.0359866	-0.0158607	0.0194835	-0.0489617	0.0916085	0.0896087	0.0649959	0.062353	-0.00976169	0.00388741	-0.00389791	0.0153375	0.0169841	-0.0390377	-0.0514223	-0.0141373	-0.0190433	-0.094672	0.0228268	0.0243377	0.0349376	0.0608504	0.0543017	0.0136364	0.0300851	-0.0472115	-0.0388265	-0.0399017	-0.0828242	-0.0331437	0.00229958	-0.00230325	-0.0382691	-0.0285759	0.0102431
ALDH2_P05091-2	0.24612	-0.0254137	0.0249737	0.172466	-0.0304145	0.410591	0.105834	-0.162952	-0.0725637	0.0666869	0.073053	0.0677618	-0.105379	-0.0937945	-0.129049	-0.0540769	-0.0710823	0.0267031	-0.0895681	0.0197754	0.1341	0.0312788	-0.165521	-0.0824904	0.0704466	0.0843972	-0.12477	-0.0200502	-0.120141	0.0656023	-0.100059	0.072383
ALDH1A1_P00352	-0.018627	-0.0886262	-0.0323767	0.00324697	0.03248	0.0431799	0.0191085	-0.0455665	-0.020455	-0.00325429	-0.0317337	-0.0196579	0.157731	0.0974988	0.0620718	0.00669147	0.0534123	-0.0102844	0.147821	0.129421	0.0922458	0.0781146	-0.0137183	-0.0604142	0.0408119	0.00840145	-0.0668704	-0.0354431	0.060533	-0.0230732	-0.00845066	-0.0566149	-0.0106511	0.0304691	0.0105731	0.0776579	0.0261118	0.0121169	0.0522142	-0.0245128	-0.0160952	-0.0173723	-0.0729239	-0.0472904	0.0120802	-0.0332045	0.0226314	-0.023321	-0.0541428
STIP1_P31948-2	0.0424991	-0.0632254	0.0032497	-0.0110622	-0.00742798	0.0149477	-7.61444e-05	-0.0460218	0.00949342	-0.0189823	0.0256045	0.00673325	7.61404e-05	-0.0157666	0.0048833	-0.0144795	0.0385192	-0.00445544	-0.0233936	-0.0329509	-0.029923	0.00731188	-0.0155753	0.00444172	0.0085189	0.0170608	0.0159476	0.0296133	-0.0537966	-0.0219264	0.00826886	-0.037706	0.0602275	0.0191001	0.0320481	0.0199629	0.0305986	0.0201722	0.0158335	-0.0257242	-0.00426798	-0.0245619	-0.0565871	-0.0312546	-0.0107228	-0.00374507	-0.0420824	0.00373537	0.0212492
STIP1_H0YGI8																	0.0798047	0.00166545	0.151157	0.0502836	-0.0102377	0.245362	-0.252729	-0.00166737	0.0757209	-0.161781	-0.147542	0.0227763	-0.153308	0.0798633	-0.132375	-0.0836013
ST13_P50502	0.0910987	-0.0400696	0.0351153	0.0297375	0.0317189	0.0656695	0.015329	-0.0462384	0.00110743	-0.0477549	0.0232089	-0.00110828	-0.0377127	-0.0210358	-0.0278458	-0.0294585	0.0809015	0.047678	0.0155426	-0.00368256	0.00550454	-0.0203579	0.00367318	0.0357627	0.0128137	0.0458726	-0.0330518	-0.072764	-0.042277	-0.0902352	-0.077666	-0.102446	0.0896441	0.00234998	0.024875	0.0749439	0.0590294	0.0802391	0.0165663	0.0167009	-0.0290392	-0.0360742	-0.0214761	-0.00757174	-0.034577	-0.00235381	-0.0821706	-0.0319624	0.0296685
NNT_Q13423	0.060965	-0.0349777	-0.00163959	0.0225838	0.0225452	0.0609871	0.000467784	-0.0398905	-0.00302698	0.00589726	-0.000467936	0.0199358	0.00790656	-0.0437054	-0.00439489	-0.0227159	0.0619004	-0.000185543	0.000185519	-0.0192257	0.0200074	0.0290979	0.0545159	0.056904	0.0266768	-0.00781225	0.00321267	-0.019541	-0.283478	-0.209042	-0.0548628	-0.0916506	0.0602778	0.0700983	0.0578686	0.0838745	0.0882279	0.0945165	0.040194	-0.0107407	-0.011779	-0.0582772	-0.0293735	-0.0903017	0.00281133	-0.00281682	-0.0348927	-0.013795	0.0484869
MSL1_Q68DK7	-0.181467	-0.206804	0.0127776	-0.0158745	0.0274747	0.0282762	0.00427485	-0.116516	-0.187517	0.0276892	-0.098202	0.0317388	0.0785656	-0.0582857	0.169786	-0.00428756	0.274727	-0.0313139	0.36415	0.030146	0.239028	-0.0307894	0.157787	0.186531	-0.0617481	-0.0656814	-0.105878	-0.215263	0.242118	0.377448	-0.306699	-0.213975																	0.0407006
RFC1_P35251																	-0.087319	0.609488	0.123505	-0.328483	-0.0605233	0.160661	0.0427445	0.195188	0.154713	-0.0440497	-0.244886	-0.396902	0.103699	-0.347102	-0.12569	0.380585	0.150054	-0.0737184	0.240987	-0.1871	-0.243484	-0.345362	-0.32325	0.325214	-0.0254084	0.0566489	0.0249687	0.403439	-0.186641	-0.179891	0.260483	0.0330149	-0.162829
UBXN4_Q92575	0.0445711	-0.0442144	0.0549764	0.0564161	0.0307932	0.000334157	-0.0205923	-0.0851786	-0.000334234	-0.0485468	0.0507402	0.0463684	0.0545489	-0.0760587	-0.0847248	-0.0361574	0.116859	0.00833769	0.101643	0.0326484	0.0232891	-0.00838616	0.0270188	0.0350769	0.0127321	-0.0279895	-0.0550628	-0.080823	-0.0921115	-0.0139893	-0.0778785	-0.0627021	0.0424797	0.0111954	-0.136969	0.0720773	0.174728	-0.070433	-0.0618569	-0.0592231	-0.0946455	-0.0640771	0.216594	0.0242765	0.0666682	-0.0279565	-0.0112829	0.0555818	0.134125
CCNDBP1_O95273	-0.0522052	0.0658046	0.192632	-0.0172013	0.0102594	0.0528974	-0.0209359	0.138754	-0.0723211	0.101947	0.0782058	-0.0103329	-0.17881	-0.18928	0.0936515	-0.0479161	0.158543	0.019688	0.142469	-0.123763	0.0174812	-0.154942	-0.00902515	-0.0243456	0.0559051	0.00966655	-0.131364	0.0346246	-0.140656	0.00896905	-0.0207333	-0.0505528	0.0908343	-0.0161745	0.00296669	-0.112012	-0.155639	-0.0804792	-0.216963	0.013721	0.0209608	0.0472665	0.034469	0.086193	-0.0029728	0.0968843	-0.00703505	-0.00651997	-0.0801386
NDST1_P52848	0.0999237	-0.00379401	0.0254475	-0.207084	0.113245	0.00378406	-0.00691672	0.0113088	0.0902537	-0.0398527	-0.104904	-0.0328865	0.182062	-0.0916814	0.068624	-0.0683759	-0.0989777	-0.0950104	-0.169175	0.150533	0.222124	-0.582119	-0.00181308	0.069212	0.0534872	0.00181081	-0.0868311	0.104062	0.332862	-0.0437305	-0.00552724	0.110587	0.0611341	-0.117358	-0.12054	-0.125503	-0.289561	-0.0144254	0.056522	0.21019	-0.0590893	-0.000269103	0.0311231	0.0746482	-0.110075	0.0380706	0.000269052	0.01827	-0.280637
NDST2_P52849	-0.436106	-0.0379631	0.421529	-0.0225527	-0.0373895	0.0505295	-0.0604981	0.0222056	0.166435	-0.0534411	0.0617683	0.207685	-0.0435149	-0.262376	0.037315	0.106725
FAM89A_Q96GI7	0.0896862	-0.256717	0.0481569	0.14506	-0.035578	-0.0348753	0.00970349	-0.0097692	0.160387	-0.105161	-0.248733	0.212024	-0.156917	-0.308276	0.350387	0.130777
BRD4_O60885	0.113478	0.227281	-0.0531491	0.0953674	-0.0588128	0.0380201	0.173391	-0.0390493	-0.18696	0.0818666	0.17766	-0.183155	0.0958714	-0.131046	-0.160946	-0.0713387	-0.0129741	-0.00067577	0.175116	0.147874	-0.437735	-0.487326	0.000675454	0.107426	0.0721898	-0.0524546	-0.0417704	-0.0831323	0.058146	-0.126894	0.644262	0.548787	0.0290761	0.0117261	-0.000538667	0.0233483	2.23846	2.20703	-0.269322	-0.236278	-0.0189984	-0.0141148	0.0394607	-0.0568695	0.0570232	0.000538466	-0.0556321	-0.0322191	0.230789
BRD3_Q15059	0.00553552	0.070489	-0.844905	0.166028	0.339189	-0.300222	-0.00555684	-0.298728	-0.406091	0.481762	0.235207	-0.0923778	-0.15421	0.228571	-0.220277	0.225014	0.0888547	-0.166366	0.141241	0.0216997	-0.647991	-0.678552	-0.0440358	0.0406322	-0.169077	-0.0220311	0.155333	0.0564008	-0.0545861	-0.107877	0.670914	0.691714	0.0964912	0.0746831	-0.129884	0.0300923	1.89522	1.90176	-0.0308316	-0.122298	0.0484555	0.0446412	-0.0402717	4.44647e-05	-4.44661e-05	-0.0417628	-0.133734	-0.0177616	-0.0164896
BRD2_P25440-2	0.483395	-0.523441	-0.302944	0.197309	0.409156	0.0700523	0.101298	0.170439	-0.591473	-0.681609	0.0135206	0.720638	-0.314181	-0.0136485	-0.094686	-0.419538	-0.0548179	0.643409	-0.0176778	0.050197	-0.345511	-0.0822373	1.01374	-0.0614259	-0.0471851	0.0174638	0.0734811	0.183925	-0.0583093	-0.12035	0.565897	0.405539	0.0346923	0.00634306	0.100581	0.118643	2.36337	2.32512	-0.414624	-0.306405	-0.0682402	-0.00637107	-0.0606597	-0.0684469	0.0102129	0.0477167	-0.095489	-0.126189	0.231102
RPAP1_Q9BWH6	-0.0116504	-0.0735475	0.0516194	0.00161989	0.0638889	-0.0490097	-0.0316886	-0.0411757	0.00935825	-0.00162171	0.017392	0.0310413	0.0377046	0.009221	-0.00752963	-0.0181031	0.0414509	0.0236214	0.0328597	-0.0733719	0.0111402	0.0276202	0.000735389	-0.000735764	0.0505917	0.0115171	-0.127963	-0.12619	-0.0440224	-0.122817	-0.0548319	-0.087586	0.0796204	0.0469659	-0.033463	0.0372997	0.085302	0.0560099	0.0351803	0.0629096	-0.00477475	-0.0921901	-0.00596022	-0.0404853	0.004759	-0.0196998	-0.124859	-0.0270657	0.0259252
BCAR1_P56945-6	0.0901493	-0.0293014	0.115602	0.0271108	-0.0580853	0.00397431	0.107209	0.151241	0.0486791	-0.101425	0.0197607	-0.00398528	-0.0301461	-0.0400615	-0.0687981	-0.0235648	0.0542004	0.0239101	-0.087358	0.00951471	0.120243	0.0636171	0.0262473	-0.0398435	-0.040661	-0.0379814	-0.0257847	-0.00729304	-0.0893195	-0.0719924	0.0292168	0.00725636	-0.0686754	-0.037603	-0.147596	-0.0863167	0.0990634	0.00807254	-0.105076	0.024097	0.0036287	-0.0816438	0.0951585	0.0647988	0.0653926	-0.0213107	-0.00363785	0.0347914	0.0830737
EFNB1_P98172	0.069831	-0.00646663	-0.0471985	0.0751612	0.00162194	-0.0914682	0.0435814	0.0838366	-0.0819614	0.00440475	-0.0682774	-0.00680058	0.00467169	0.0566072	-0.00162376	-0.0362206	-0.117634	-0.217144	0.133287	0.0654619	0.0095175	-0.107807	0.0293369	0.0626574	-0.0151641	-0.00958071	0.124127	0.181763	-0.154657	-0.200928	0.092039	-0.197933	0.00531237	0.113163	0.0309714	-0.00533201	-0.0340432	0.0880419	0.016292	-0.265204	0.0216187	-0.18748	-0.106902	-0.185045	0.11039	0.0488141	-0.243706	-0.0720787	-0.161036
IRGQ_Q8WZA9	0.0458244	-0.0299354	0.0220855	0.00637101	0.0373673	0.04817	-0.00639927	-0.0268231	-0.022748	-0.0384132	0.0540274	0.0260567	0.0629362	-0.100919	-0.0324281	-0.0734756	0.00634571	-0.0352258	-0.0431278	0.0224836	0.00288242	-0.00317988	-0.00363141	0.0732204	0.039475	0.0448909	0.0194988	0.0962926	-0.0489519	-0.00288819	-0.0471344	-0.0667943	0.067112	-0.0103865	-0.0513078	0.0984627	0.0217829	0.0329599	0.0969062	0.0103123	-0.012114	0.0221697	-0.0225908	-0.0818985	0.0139248	-0.108158	-0.0707193	-0.0396118	0.0642017
CTNND1_O60716	0.0256431	-0.0534208	0.0118398	-0.0209896	0.0951377	-0.213621	0.0383981	0.198526	-0.0119378	-0.154452	-0.0841614	0.0775857	0.0870347	-0.0744299	-0.0187705	0.16686	-0.0667253	0.0748031	0.113937	-0.00947948	0.134252	-0.0118447	-0.0732768	-0.079038	0.0094176	-0.154693	-0.0501037	0.187936	0.211381	-0.0137533	0.0701085	0.281614	-0.380006	-0.240909	-0.286671	-0.200053	-0.31337	0.0196948	0.03499	0.167075	0.13631	0.135233	0.521121	0.343635	-0.0199674	-0.112373	0.350736	-0.436071	-0.135168
NDFIP2_Q9NV92
RBM39_Q14498	-0.0301728	-0.0677836	0.0347017	-0.0105738	0.0231572	0.0266164	0.0255571	0.0662831	0.0104968	-0.0230659	-0.075069	-0.0296221	-0.0264439	0.0269439	-0.0182023	0.04763	-0.0214518	0.0834465	-0.0045331	-0.0243308	0.00451891	0.119364	0.0936124	0.0711498	-0.143811	0.0842141	-0.0343196	-0.0556872	-0.052297	-0.0511316	0.0888887	0.0686373	0.000797341	-0.000797782	-0.0725123	-0.00937719	0.0746728	-0.0820866	-0.0109491	-0.00158914	0.0128181	0.13537	0.0493846	-0.0684856	0.17964	0.135529	-0.0118451	0.0685752	0.00104856
RBM23_Q86U06	-0.00494133	-0.0895954	0.0803549	-0.0328949	0.31405	0.0555267	-0.189562	0.133948	-0.143431	-0.139182	0.0429983	0.00492446	0.0756605	0.217808	-0.335672	-0.061861																	0.436296	-0.253542	-0.21549	0.15706	-0.00411444	0.00410274	0.190142	0.0182021	-0.240215	-0.0900134	0.206902	-0.269611	0.374427	0.255206	-0.0706817	-0.345989	0.0745887
RAB3GAP1_Q15042	-0.0418996	-0.195151	0.0543283	-0.0283877	0.0987099	0.0380979	-0.0619866	0.113248	0.00226575	-0.0941204	1.95376e-05	-1.95379e-05	-0.0430785	0.0297865	-0.170034	0.00345633	0.0222307	0.0253463	-0.00514298	0.0571236	0.0484325	0.00512471	-0.0758766	-0.0252615	-0.0121147	-0.0444575	-0.244284	-0.169256	0.0101343	-0.0517652	0.0242257	0.0982418	0.0273347	-0.0295063	-0.0309498	-0.15521	-0.127057	-0.0407122	-0.0282189	0.126237	0.00564912	0.107431	0.210697	0.222284	0.0212209	-0.00567133	0.0491414	-0.0428843	-0.0599965
CHCHD3_Q9NX63	0.024137	-0.0695603	-0.012859	0.00900916	-0.0303323	0.018547	-0.0460334	-0.0688459	-0.00138899	0.00138765	0.0166385	0.0196767	-0.031667	0.00329566	0.00262538	-0.0133178	0.12288	0.00639883	0.0346238	0.00549318	-0.0114298	-0.0859122	-0.0222113	-0.00581078	0.00491134	0.0217813	-0.0279418	-0.0287515	-0.00315515	-0.0356385	0.0825763	0.00314827	0.0475575	0.0156308	0.0559412	0.0282814	0.00176	0.0297631	0.0171986	-0.0558523	-0.0358929	-0.0224797	-0.0512699	-0.0434039	-0.0588111	-0.00176215	-0.053618	0.00771377	0.0967648
CNOT1_A5YKK6	0.0147638	-0.0605573	0.0607534	0.0275376	0.0185638	0.00661623	0.0105501	0.00693125	-0.0351505	-0.00749176	-0.0079888	0.00957741	-0.00666528	-0.0408382	-0.0338397	-0.00664671	-0.0122637	0.0820483	-0.0540058	-0.0371984	0.0538964	0.0160197	0.00368237	0.0631801	0.0212991	0.00765644	-0.0863987	-0.0767427	-0.0202049	-0.0658638	-0.0036918	0.0597464	0.0417521	0.00304394	0.065235	-0.0194624	-0.0297434	0.0716309	-0.00305038	0.0428917	-0.0147075	-0.0265914	0.014081	0.0516669	0.00988146	-0.0516885	-0.0422018	-0.0595181	0.0467941
HDAC10_Q969S8	0.112727	0.0566877	-0.15877	-0.0748033	0.0721597	0.167921	-0.139916	-0.370442	0.103336	-0.207915	0.0664036	0.0654629	0.0667867	-0.0867165	-0.0590066	-0.0638528	0.0559714	-0.0149821	-0.00758692	0.176414	0.325184	0.0902082	-0.118527	-0.0277675	0.0477473	-0.173492	0.00754723	0.103342	0.0892287	-0.0732498	-0.141454	-0.215566	-0.0562575	-0.0183331	0.0231269	0.119581	0.0423485	-0.0976538	2.53653e-05	-0.0448182	0.0189089	0.0221689	-0.0898728	-2.53658e-05	0.0496613	-0.150951	0.0430985	-0.0202822	0.0530449
EEF1G_P26641-2	0.0878388	0.0844326	0.0450736	0.0292254	-0.0307209	0.0408719	0.00355814	0.0623645	-0.00356694	-0.0479171	0.00882489	-0.0501946	-0.102743	-0.0633602	-0.106354	-0.0301937	0.00406491	-0.00496111	-0.0391625	-0.0813673	0.00617087	0.111932	0.0633673	0.10168	-0.0121262	0.0596318	0.0368283	-0.00407639	-0.0592553	-0.0625368	0.0225852	-0.0334203	0.0458957	0.0333514	-0.00899217	-0.0517882	-0.0558369	0.0658198	-0.00410193	0.0580762	-0.00052209	0.0206994	0.0123878	0.000521901	-0.0211815	0.0087179	-0.0654915	-0.0230126	0.0697853
CAST_P20810-6	0.0309465	-0.0455064	-0.0142821	0.0210516	-0.0127437	-0.00353153	-0.0105974	-0.0738492	-0.00429562	0.0187354	0.0334508	0.0103138	0.0460664	-0.00472183	0.0417635	0.00352291	0.0267172	0.00748525	0.0217149	0.0382047	0.0279543	-0.119882	-0.054875	-0.0736049	0.0296293	-0.00752429	-0.0585352	-0.0657797	0.0466131	0.0384565	-0.0130221	-0.00856225	-0.0449988	-0.0167259	-0.066956	0.0380551	0.0659748	-0.0432561	-0.0216048	-0.0543127	-0.044975	-0.00646968	0.040738	0.0064408	0.060033	0.0690399	0.0168834	0.0460149	0.0134056
RRM2_P31350-2	-0.00617455	-0.115088	-0.0275578	-0.0256558	0.00614824	0.0181183	0.0455443	-0.00961386	-0.0251907	0.0270616	0.0191732	0.0202978	0.0300259	-0.00896575	0.028807	-0.0530985	0.0683459	-0.0404318	0.037381	0.00259538	-0.0131546	0.0310609	-0.00583385	0.0123905	0.0535504	0.0288952	0.0243817	-0.0219648	-0.0380909	-0.00260006	-0.0139514	-0.0658822	0.0614151	0.0349027	0.052665	0.000589588	-0.00777019	0.0597398	0.0465905	-0.00802547	0.0165789	-0.000589829	-0.120129	-0.0727136	-0.0272332	0.0236576	-0.0268028	-0.0698812	-0.0721882
RRM2B_Q7LG56-6	-0.0205992	-0.104705	0.0520988	0.0409127	-0.0396038	0.0443767	0.00435015	-0.0531389	-0.012113	-0.00436331	0.0077424	0.00778598	0.0692215	-0.020122	0.042358	-0.0226852	-0.0421544	0.0225429	0.113674	0.0360464	0.0877611	-0.203498	-0.127023	0.0466695	0.0265789	-0.0249854	0.0157994	-0.0159743	-0.100077	-0.148681	-0.143862	0.0528949	-0.00349028	-0.0588176	0.00348186	0.0482128	0.0920832	0.00773895	0.0220058	-0.117117	-0.060938	-0.0472822	-0.0209045	-0.0433553	0.0673	-0.00427887	0.0704795	0.0409654	0.0273848
DBN1_Q16643-3	-0.0745425	-0.155026	-0.0829091	0.00763081	0.020842	-0.0625385	-0.0792245	-0.132417	0.0460128	-0.0329996	-0.00405569	0.0450153	0.134194	0.0628091	0.00404432	0.0941683	-0.0522219	-0.00373628	-0.106904	-0.115906	0.0583202	0.19863	0.0255736	0.0387952	-0.0236819	-0.0470923	-0.0254453	0.00372663	-0.0398579	0.0213629	0.104367	0.0704003	0.0865123	-0.0169256	-0.17031	-0.269844	-0.0180308	0.0562881	0.0501366	0.0970027	-0.0380058	0.003798	0.0025888	0.0844847	0.0107502	-0.00259345	-0.0216793	-0.0654994	-0.0152403
WIPF2_Q8TF74	-0.0272073	-0.0378401	-0.0130088	0.0316787	0.00426584	0.0105752	-0.0239455	-0.0885895	-0.00833865	0.00167856	-0.00168052	0.055529	0.0337279	-0.0233588	0.0510436	0.0594158	-0.0121309	0.0287079	0.0396158	-0.0149833	0.0666424	-0.00748439	-0.0106905	-0.0313656	0.00767772	0.0419095	-0.126949	-0.154079	-0.0607012	0.00744577	0.0229685	0.0574072	-0.0219658	-0.0963431	0.00483888	0.000345102	0.0184374	-0.103744	0.0154735	-0.115734	-0.0643344	-0.000345184	-0.0468672	-0.0738549	0.0292578	0.0180339	0.0634093	0.0094311	-0.00877409
COPB1_P53618	0.0188508	-0.0591128	0.0103094	0.00358046	0.0214337	0.0687188	0.0515649	-0.0343593	-0.0190747	-0.00358937	0.0589362	0.0184932	-0.0131475	-0.041849	-0.00964462	-0.0256088	0.0326139	0.0132403	0.0529859	0.00177118	-0.013675	0.0594777	0.00936393	0.0547333	-0.00177335	-0.0491568	0.00346191	-0.00810638	-0.0556466	-0.019836	-0.0109729	-0.0595685	0.0185809	0.0279453	-0.0271517	0.0341247	0.00450669	0.0669696	0.00653654	0.0621834	-0.00452081	-0.0482331	-0.0492284	-0.0429267	0.00450899	-0.00731294	-0.0643839	-0.033569	-0.0229663
HSD17B8_Q92506	0.00486519	-0.0297637	-0.023458	-0.0074571	0.0194043	0.0116578	-0.00513806	-0.0540306	0.909962	0.0528303	-0.0231133	0.0416914	0.0574427	-0.00488165	-0.011439	0.006686	0.0338155	-0.00903988	-0.0199362	-0.00701004	0.0610577	-0.0552526	-0.0192863	-0.00490846	-0.0260396	0.0288786	0.0744906	0.13029	-0.0198632	0.00489182	0.0219197	0.115228	-0.00472317	0.0664971	0.0692274	0.1999	0.00470776	0.0402509	-0.0752016	-0.123663	0.330192	-0.046651	-0.0721532	-0.0377247	-0.00685249	0.142173	-0.0825053	0.0407704	0.0525593
BTAF1_O14981	0.0678986	0.146191	0.00524538	0.0707445	-0.00516949	-0.0782744	-0.123636	-0.192224	-0.0451602	-0.066181	-0.0158796	0.0038411	-0.00385136	0.0610061	0.0548009	0.0477113	0.106067	0.0572855	-0.00803113	-0.0560008	0.0330555	0.0400713	0.0106162	0.039458	0.00798667	0.0301048	-0.093548	-0.0869815	-0.0746571	-0.0262028	-0.0604153	-0.0795098	-0.0497365	-0.00382473	-0.0235737	0.102763	0.0152257	-0.02154	0.00381461	-0.0124758	-0.179318	-0.0209634	0.0652226	0.0175638	0.0901469	0.0189525	-0.116578	0.0732589	0.130553
TTC4_O95801	0.0595326	-0.0406334	0.0898875	0.0545633	0.0710475	0.0337592	0.0184783	0.0533864	-0.018185	-0.079627	-0.0327196	0.0179586	-0.0347225	-0.0277222	-0.111042	-0.0670629	0.146141	0.0475606	-0.0231224	-0.00802842	0.10172	0.0522857	0.0771552	0.154143	0.00706612	0.0222053	-0.111755	-0.108072	-0.0071009	-0.0423549	-0.0273122	-0.0515347	0.102	0.0299882	0.0228249	0.0158002	-0.0205463	0.00393568	-0.0612291	0.0932946	-0.0197917	-0.0416567	0.000547007	0.0569409	-0.000547214	-0.0579192	-0.189111	-0.102724	0.148931
FBXL8_Q96CD0	0.062698	-0.308736	0.124655	-0.135453	-0.0020886	-0.27049	0.0460089	0.00208558	-0.0995949	-0.0265687	0.0350851	-0.255826	0.0779728	0.187497	-0.366625	0.0863176																	0.350254	-0.156526	-0.225354	0.101608	-0.018055	0.52177	-0.148114	-0.149026	0.234958	0.0178319	0.0513228	-0.0965941	0.185137	-0.241311	0.0477607	-0.0935945
C2CD2_Q9Y426	-0.105903	-0.204614	0.0108187	0.00324154	0.05814	0.147406	-0.0908944	0.012368	0.000249073	-0.0343343	0.156534	-0.000249116	-0.0149382	-0.0442518	-0.0596251	0.0160574	-0.0510967	-0.0110732	0.061479	0.0651759	-0.0134429	0.0213548	0.0372149	0.00673069	-0.0255998	0.166134	0.0717962	-0.0879434	-0.0519444	-0.0447775	0.0076829	-0.00676223	-0.121679	-0.343713	-0.16886	0.0266442	-0.124641	-0.00670403	0.105872	-0.0665266	-0.0790971	0.074589	0.307526	-0.0323235	0.00667303	0.203594	0.206135	0.148671	0.0771425
RAB3GAP2_Q9H2M9	0.0254709	-0.0806598	0.0966051	0.0385774	0.0794858	0.0263318	-0.0117032	0.129071	-0.0128274	-0.0110786	-0.00668805	-0.0145689	-0.0431546	0.0116504	-0.0517099	0.00665719	-0.0317381	0.00753736	-0.00757695	-0.0468537	0.112289	0.0996998	0.0617101	0.120416	-0.0840298	-0.0532579	-0.121885	-0.14207	0.0987218	-0.0924963	0.0503749	0.125178	-0.010912	0.00305844	-0.0378285	-0.116623	-0.104022	-0.03512	0.0431664	0.159086	-0.0500702	0.172301	0.210234	0.215109	-0.00306494	0.00434779	0.0834186	-0.109328	0.0434581
BAG4_O95429	0.0652833	-0.098989	-0.00095098	-0.0118913	0.0602303	0.0511057	-0.0361942	-0.109463	-0.0172434	0.010884	-0.0383297	0.000950354	0.0418692	-0.0746552	0.01737	0.0111562	0.0418189	0.0236581	0.0532207	0.0402419	0.0854081	0.0125585	-0.00921569	-0.00775288	0.0171548	-0.0787543	-0.0527759	-0.0518296	-0.00421675	-0.10843	0.00420446	-0.0478241	-0.00612838	-0.00840297	0.0701408	0.0168257	0.202861	0.0432141	0.0237567	-0.0247264	-0.0142239	0.00610246	-0.10354	-0.105795	0.0386576	0.00931406	-0.139106	-0.0796904	0.00540693
OTULIN_Q96BN8	0.104851	0.0131217	0.119953	0.0901263	0.0873897	0.0140804	-0.0453905	-0.032267	-0.0285799	-0.0132422	0.0305393	0.0898963	-0.0317356	-0.0176008	-0.0553859	-0.0838984	0.179327	0.180546	0.0392137	0.00635734	0.129037	-0.0529602	-0.00638548	0.137698	0.011089	-0.09064	-0.236169	-0.216305	-0.0243091	-0.152575	-0.178001	0.0106076	0.0363573	0.00819697	-0.0669188	-0.0356604	-0.033387	-0.00461759	-0.0626139	0.0145835	-0.0643566	0.00048496	0.0759003	-0.00330669	-0.000485123	0.0100698	0.088561	0.00368622	0.0762958
PPP2R1B_P30154-2	0.0040366	-0.106489	0.0597159	0.0262658	0.0272689	-0.0381115	0.0195898	-0.00404792	0.00920291	-0.015656	0.116927	0.0604299	-0.00880836	-0.144151	-0.109087	-0.0408153	0.018053	0.0557722	0.0857823	0.136171	0.138767	0.00153886	-0.00609531	-0.0266246	-0.052783	-0.0749467	-0.0548708	0.0161705	0.119416	-0.00154051	-0.0393641	-0.0194037	0.0496908	0.0200345	0.0591479	0.0180245	0.00337942	-0.0155065	-0.015427	0.0405714	-0.00338735	-0.0284378	0.0129287	0.0355999	-0.0189972	-0.0711299	-0.00537926	-0.0455938	-0.00871067
PPP2R1A_P30153	0.0863535	-0.0580791	0.0307326	0.0185148	-0.00160146	0.0434597	-0.00621705	-0.0516996	0.00159969	-0.0122863	0.0310604	0.00880282	-0.00848509	-0.0126567	0.0198071	-0.0175697	0.0641859	0.00916088	0.100005	0.0101589	-0.00294316	0.0206611	-0.00606397	0.0265619	0.018435	-0.0193265	-0.0311207	-0.0418798	-0.0348188	0.00293717	-0.0270154	-0.057716	0.103557	0.0413706	0.0707443	0.0437297	0.0526803	0.0505298	0.0381036	0.00918498	-0.0096344	-0.0251869	-0.024926	-0.0280736	-0.0235168	-0.00924383	-0.0960252	-0.0340583	0.0733742
PPP2R1B_H0YDG7	0.469199	0.117216	0.0262175	0.125812	-0.112256	-0.485917	-0.814283	-0.818163	-0.00772557	-0.275415	-0.687114	-0.169814	0.0724574	0.163393	0.162321	0.00768442	0.959134	0.425695	0.514204	0.625737	-0.130732	-0.731436	-0.633289	-0.368796	0.25825	-0.603791	-0.811358	-0.52991	0.139799	0.119864	-0.404384	0.492102	-0.116019	0.162431	-0.0354584	0.0364939	0.347046	-0.0166091	-0.0759657	-0.0443924	-0.0827233	-0.107487	0.21758	0.164819	0.176982	-0.036275	0.0164201	0.218139
IRF2BP2_Q7Z5L9	-0.0324746	-0.0706484	0.00262057	0.00125722	0.0203167	0.0345454	-0.022837	-0.0498108	0.0256729	-0.0382745	-0.0464671	0.0131814	0.019321	-0.0202602	0.044334	-0.00125832	-0.0770134	0.00370618	0.0017372	-0.029482	-0.00173929	0.00537564	0.0251373	0.0559422	-0.094926	0.0815717	0.0391164	0.0576544	-0.0545793	-0.0655001	-0.0478896	-0.078942	-0.00848396	0.0295379	-0.00438866	0.0768871	0.0863173	0.00330177	-0.035032	-0.103985	-0.0889152	0.0108528	0.0360839	0.00268859	-0.00269361	-0.01833	-0.15045	0.0234735	0.0696362
IRF2BPL_Q9H1B7	-0.0768668	-0.116019	-0.0837809	-0.00494322	0.128518	0.00492634	0.0231568	-0.098248	-0.0380496	0.0229364	0.0560741	0.072756	0.0548764	0.0209668	-0.0105383	-0.0919534	0.0233125	0.0567325	0.0626239	0.0790251	0.0506208	-0.035793	0.0235079	-9.58349e-05	-0.00991389	-0.000677909	9.58286e-05	-0.0357268	-0.0315454	-0.0495599	0.0353231	-0.0807043	0.0527696	-0.0321132	0.107049	0.0587149	0.0581494	-0.00382911	0.0399475	0.018386	-0.0606979	-0.109323	-0.0145542	0.00381897	0.0206641	-0.106662	-0.0792703	-0.0789873	0.0549397
IRF2BP1_Q8IU81	-0.314453	-0.373893	0.22606	-0.0225636	-0.341056	0.0222161	0.0940139	-0.232737	0.119042	0.0283623	-0.265274	0.287736	0.0640519	-0.299422	-0.294125	0.28648																	-0.10736	0.0122121	-0.16879	0.129799	-0.0123164	0.0782721	0.162869	-0.0407514	-0.12868	0.017524	0.0842326	-0.185378	-0.144496	0.218349	0.386993	-0.105321	0.239462
ARAP1_Q96P48	0.268264	-0.365845	0.085832	0.0151583	-0.322151	-0.00308927	0.440323	0.271162	-0.162921	0.155848	-0.00322745	0.00308267	-0.17883	-0.0855164	-0.343534	0.174793	0.00516362	-0.0993072	-0.00290661	0.00290076	0.0997059	0.030588	-0.10422	0.195367	-0.252899	-0.284678	-0.179197	-0.0320676	0.0259429	-0.325772	0.109073	0.126559	-0.116137	-0.0980497	-0.102697	-0.334334	0.0106545	-0.119337	0.013762	0.214854	-0.120993	0.213819	0.340354	0.23771	0.126521	-0.0107338	0.165031	-0.11348	0.00479799
GPATCH8_Q9UKJ3	-0.0695114	-0.116865	-0.00357716	0.0163289	0.00356832	0.0423356	0.00416755	-0.068709	-0.0296281	0.0678708	0.0445063	0.0603529	0.0297837	-0.0682873	-0.0249486	-0.0741458	-0.144062	-0.0435763	-0.0867014	0.0924039	0.166292	0.0654579	-0.0930099	-0.000569762	0.0596003	0.000569537	0.129022	-0.012805	-0.00405796	0.0376209	0.229204	-0.0826113	-0.0103217	0.00347956	-0.0091654	0.0464421	0.0413153	-0.031872	-0.057455	0.00775432	-0.0239579	-0.00348797	-0.0226826	0.0428304	0.142019	0.103963	0.0212844	-0.0144871	0.234071
PDHA1_P08559-4	-0.186236	-0.230862	0.0331906	-0.0857676	0.170054	-0.10041	0.17753	0.312926	0.0626323	-0.014147	0.015282	-0.0402591	-0.125019	0.00778583	-0.00782808	0.0779257	-0.453845	-0.104247	-0.0955024	-0.0857344	0.0557215	0.0626601	0.159329	0.103026	-0.0487064	-0.14016	0.0233045	0.0155172	0.00938983	-0.0194999	0.00120939	-0.0012104	-0.098793	-0.0731076	-0.0199962	-0.304613	-0.174643	-0.0708738	-0.0834612	0.13837	0.076757	0.0827347	0.191712	0.220452	0.0197228	-0.114498	0.0582572	0.0387291	-0.151122
CPSF1_Q10570	-0.00330712	0.0743704	-0.0649521	0.016046	0.0432484	-0.0206633	0.0579717	-0.00667905	0.0669799	-0.015914	-0.0417668	0.0818529	0.0349252	-0.0491413	-0.0265711	0.00329956	0.035016	-0.0630524	0.00243217	-0.11788	0.0263599	-0.00243628	-0.00361694	-0.0101361	0.0618395	-0.0118408	0.120166	0.209212	-0.0398257	-0.0955183	0.0378008	0.0148965	0.128376	-0.0212669	-0.101048	-0.0538061	-0.0185809	-0.0787841	-0.00594849	0.196662	0.102766	0.0852631	0.00140408	0.094214	-0.00140545	0.0143559	-0.0335304	0.122992	-0.0838094
TEX30_Q5JUR7	0.0117112	-0.0285422	0.0343411	0.00335774	-0.000826871	0.0569151	-0.0211345	0.000826398	0.0131682	-0.133086	-0.0180225	0.0675529	0.162593	-0.00336787	-0.0796731	-0.245041	0.333997	0.320974	0.130781	-0.0173891	0.378778	-0.13645	0.017182	-0.12234	-0.0412157	0.18536	-0.662712	-0.538467	-0.242493	-0.340626	0.0226942	0.135609	0.236049	-0.039912	0.146709	0.0209504	-0.192303	-0.0900659	-0.0612988	0.124265	-0.159901	-0.0192169	0.0367439	0.0503099	0.0852937	0.0189643	-0.153918	-0.201029	0.0123135
NAP1L4_Q99733-2	0.0212854	-0.0634992	0.0233178	0.022344	0.020096	-0.00444479	-0.0154652	-0.0505934	-0.00364279	-0.0102412	0.0338144	0.0331324	0.00363361	-0.0332369	0.0266346	-0.00520548	0.0513918	0.0144078	0.019648	0.0772537	-0.0563179	0.00230612	-0.0594987	-0.00230981	-0.00967683	-0.0256419	0.0210861	0.0866984	-0.0473449	-0.0984416	-0.0385248	0.0549652	0.00590516	0.0242227	-0.0326103	-0.013595	0.00934254	-0.0223716	0.0252225	0.0100015	-0.0105043	0.000127123	-0.0422556	-0.0338994	-0.000127134	0.0394301	0.0102494	-0.00631244	0.000144457
NAP1L4_C9J6D1																																																	0.361918
NAP1L1_P55209	0.136182	0.0936755	0.0755537	0.0469041	-0.0224501	0.0503878	-0.0102727	-0.0265502	0.0102001	-0.0354397	0.0964881	0.0363253	-0.0336489	-0.0478754	-0.0771856	-0.0677499	0.0415401	0.0546462	0.0743516	0.140243	0.00900655	0.00698719	-0.113824	-0.0732348	0.0292162	-0.0102785	-0.0877189	0.0125944	-0.0934568	-0.08666	-0.00889325	-0.00702119	0.11329	0.0678141	0.00271492	-0.0104241	-0.0230751	0.0293579	0.0412333	0.114359	0.0490181	-0.00272003	-0.0313733	-0.0107875	-0.00278491	0.0207982	-0.017563	-0.0732287	0.0655749
NAP1L1_B7Z9C2	0.158021	0.0119176	-0.0051723	0.000754881	0.0692743	0.223722	-0.0294906	-0.19025	-0.000755276	-0.0996699	0.252333	0.0979365	-0.00784655	-0.0714714	0.0188336	-0.0137878	0.023711	0.16273	0.0822174	0.140578	0.483833	-0.0241072	-0.266385	-0.232581	-0.536675	-0.689997	-0.44385	0.140567	0.400796	-0.318003	-0.148938	0.149858																	-0.0285447
SLC39A11_Q8N1S5	-0.0883763	-0.0195157	-0.00230386	-0.00196524	-0.0949308	0.0808626	-0.0725598	-0.187519	0.0434999	0.0833807	0.00196257	0.0168949	0.111853	0.0204339	0.12037	-0.0141874	0.119069	0.0273779	-0.198276	-0.034897	-0.036706	-0.0887715	-0.00738	-0.0785523	0.0777137	0.0110566	0.00707513	0.29339	0.12723	0.415039	-0.00711	-0.263969	0.0609219	0.0408751	0.0959492	0.16095	0.142748	0.000518673	-0.0550826	-0.101344	-0.00051886	-0.0238697	-0.0547819	-0.0778982	0.0603579	-0.0663653	0.0583286	-0.0192786	-0.134563
MED17_Q9NVC6																	-0.235621	0.0765963	0.135588	0.0417946	-0.0062189	0.0958093	-0.0554782	-0.00961919	0.0061922	-0.0519586	-0.170552	-0.0970939	0.068969	-0.0543192	0.102717	0.0570908	-0.228192	-0.182255	0.0225098	-0.0886479	0.0691218	-0.130443	-0.0228666	-0.0813055	0.0874926	0.204375	0.215035	0.0238527	0.108853	-0.129866	-0.0809422	0.0638363	0.0927041
C11orf54_Q9H0W9	0.044351	-0.0737242	-0.00886727	-0.0279854	0.0404823	-0.0257403	-0.00400822	-0.0863855	0.0120385	-0.0196189	0.0067685	0.00399712	0.0414487	0.0410173	0.0367564	-0.00883935	0.127382	0.105355	-0.0400335	0.0321325	0.110663	0.0370562	-0.0173095	-0.0331815	0.0495707	-0.0945494	-0.122354	-0.082218	0.0171043	0.061849	-0.0412465	-0.0971788	0.0275595	0.0798245	0.0109558	-0.0274927	0.132072	-0.0331224	0.0403069	0.0543418	-0.115572	0.0564736	-0.055945	-0.153324	-0.0110396	-0.0559281	0.0197366	-0.182375	-0.0159201
SLC4A1_P02730	-0.170964	-0.138054	-0.0535958	0.145163	-0.183216	0.0199341	-0.0742604	-0.316431	0.00529823	0.152337	-0.00531776	-0.236818	0.0672016	0.127916	0.0870004	0.0474779	-0.0294432	-0.0782619	0.0300141	0.0253854	-0.00540576	0.00538558	0.00992529	0.0588594	-0.0282733	0.0350604	0.108285	0.0812432	-0.078257	-0.0278945	-0.0834598	-0.0181114	-0.0319121	0.143354	-0.0542796	0.135507	0.0574577	-0.0851171	0.00888572	-0.0695615	-0.173086	0.026694	-0.0127813	-0.00894079	0.134063	0.0514276	-0.0525342	0.0412052	-0.0824957
MARCKSL1_P49006	0.177812	-0.0115067	0.0810328	-0.0121681	-0.039447	0.0628477	0.0509139	0.0285272	0.0290253	-0.0185137	0.00761317	-0.0856604	-8.20062e-05	8.20015e-05	-0.0764437	-0.0269005	0.0968439	0.0737731	-0.0381608	0.0904166	-0.0278963	-0.0969707	-0.0999929	-0.0743943	0.0379201	0.0700591	0.118652	0.174803	0.00903251	-0.0206398	-0.0210804	-0.00908942	0.0187318	0.0181868	0.0152847	-0.0304999	0.0465043	0.0117238	0.00386171	-0.0704874	-0.035115	-0.00514422	-0.101252	-0.0877001	0.0066788	0.0150126	-0.00631539	-0.00387208	-0.0247182
MARCKS_P29966	-0.0470059	-0.0350533	-0.06857	0.0782468	0.0215057	0.0391052	-0.0957176	-0.107976	-0.0164616	0.0855199	-0.00986979	0.105683	0.0669328	0.0752951	0.00661984	-0.00665036	-0.392827	0.173594	-0.182469	-0.267303	-0.0922035	-0.225808	-0.234893	-0.0312999	-0.0203576	0.263661	0.158008	0.0200743	0.193202	0.274095	0.28284	0.252498	0.0453035	0.0886218	0.0935702	-0.0281056	-0.0686368	-0.0240744	0.0742442	-0.0716859	0.0535641	0.0328392	-0.301728	-0.080926	-0.00629063	0.0692643	-0.0386785	0.00626332	0.00723576
SND1_Q7KZF4	-0.226831	-0.246591	0.0784327	-0.141596	0.0154624	-0.192269	-0.00143522	0.449283	0.0786073	0.0136493	-0.0651881	0.00143379	-0.175987	0.162637	-0.086113	0.245853	-0.49177	-0.156425	-0.167339	-0.222487	-0.0903035	0.0124197	0.012586	-0.0125275	-0.24711	-0.218624	0.0488009	0.207671	0.425506	0.211501	0.175982	0.403243	-0.257119	-0.241713	-0.200744	-0.467178	-0.24128	-0.198204	-0.0771513	0.316066	0.104694	0.386462	0.751461	0.67475	0.0688674	-0.0723203	0.651265	0.165819	-0.194402
BCR_P11274	-0.170759	-0.204754	4.2237e-05	-0.0614091	-0.112255	-0.0457961	0.0692335	0.332115	-4.22382e-05	0.159356	-0.00205468	0.0487334	-0.0348987	0.237053	0.073131	0.179093	0.081375	-0.360369	-0.253589	-0.678207	0.167418	0.367307	-0.137299	0.165007	0.809541	-0.333624	-0.0728858	0.213636	0.0266011	-0.0271008	0.0584093	-0.100151	-0.0489339	-0.0200228	-0.0966724	-0.201097	-0.10513	-0.208515	0.0901696	0.269306	-0.0929611	0.191367	0.408172	0.389176	0.291834	0.017052	0.320706	-0.0172559	-0.285371
DHRS11_Q6UWP2	0.0643328	-0.0606332	-0.035923	0.00373457	0.0621431	0.0118194	-0.00374427	-0.0479989	-0.00892333	-0.0761526	-0.0351886	0.0171501	0.0299502	0.0265272	0.00902647	-0.0675702	0.0712474	0.0257704	0.136149	0.00707094	0.0373387	0.0677849	-0.00977324	0.000298339	-0.0284158	0.0205079	-0.0318318	-0.0002984	-0.0855037	-0.0460767	-0.0794487	-0.0427218	0.0408201	0.0615007	0.1117	0.0993138	0.106529	0.0836708	0.00364954	-0.00254818	0.00254369	-0.04011	-0.0850723	-0.0738567	-0.0622055	-0.0117103	-0.1005	-0.0766288	0.0491413
ITPRID2_P28290
TADA3_O75528	0.0898113	-0.0496834	0.0398226	0.0063578	0.0136567	0.101521	-0.0746169	-0.0364868	0.0877356	0.0206412	0.0748149	-0.00638594	-0.010283	-0.0655029	-0.0315151	-0.0281489	-0.00579812	-0.0183672	0.000357859	-0.0171165	-0.0424302	0.0132072	-0.0171516	0.0164068	0.119905	-0.022067	-0.0630367	0.00848846	-0.000357948	0.00691058	0.0609619	0.0310798	0.0272159	-0.0639935	0.00343524	0.0101598	0.0270324	0.00554836	0.035749	-0.00344344	-0.0250489	-0.0343121	-0.0655464	-0.0990415	0.0133753	0.00789954	-0.0626906	-0.0789273	0.0503289
MIOS_Q9NXC5	-0.0977562	-0.12158	-0.00712134	0.00708636	-0.00832636	-0.0384209	0.0211123	0.112453	0.0606217	0.091156	-0.0229432	0.0495829	0.0251009	-0.0105068	-0.0127255	0.0568523	-0.164258	-0.109666	0.00683469	-0.0956139	0.0363695	0.0590253	-0.0104102	-0.0686709	-0.00536436	0.00534449	0.150551	0.0405611	-0.0104661	-0.0588757	0.0730143	0.0592403	-0.0480682	0.00106194	-0.157786	0.0124562	-0.0398304	-0.0457182	-0.0112142	0.00854033	-0.00106273	0.0254958	0.00459536	-0.0376906	0.0333815	-0.0548603	0.066339	0.0466478	-0.0158077
VCL_P18206	-0.00948664	-0.109243	0.00721614	-0.0362415	-0.0249677	0.0271943	0.0311768	-0.0292216	-0.00641954	0.0249538	0.0335024	0.0127517	0.0063911	-0.0411678	0.0128936	-0.0472796	-0.00177212	-0.0267567	-0.00455368	-0.0121597	-0.0239297	0.00732412	0.0166122	0.00176995	0.0204373	0.073313	0.053901	0.026605	-0.0201338	-0.0171749	0.0420477	-0.0183273	0.00137784	0.00997971	0.0109815	-0.00137916	0.0125961	-0.00713639	0.0425657	-0.0525934	-0.00238259	-0.00702037	-0.0611826	-0.0563461	-0.00443092	0.0347562	0.02378	0.0120398	-0.0426713
EXOC8_Q8IYI6	0.0124221	-0.030589	0.0867569	0.00881023	0.0534391	0.0466805	-0.0511129	-0.111388	-0.0417345	-0.00316395	-0.00604357	0.0395175	0.00767042	-0.0105586	0.00315702	-0.0109166	0.048362	0.128737	-0.176898	-0.134697	0.0554372	0.0462364	-0.0290793	0.170806	0.123729	0.0285048	-0.291916	-0.29893	-0.206246	-0.200586	0.0593216	-0.0527409	0.104557	-0.0315167	0.023957	-0.0543422	-0.00889436	0.0667155	0.0279787	0.084259	-0.00467894	-0.0143581	0.050905	0.0552298	-0.010353	-0.0909465	-0.0669122	0.00466382	0.08714
NDUFV2_P19404	-0.0382882	-0.0862492	-0.0134858	-0.0191825	0.00633942	-0.00354143	0.00979829	-0.0790072	-0.0429381	-0.0277958	0.0733946	0.0466363	0.0223687	0.00663104	0.00353275	0.0347675	0.0623049	0.0157322	-0.0281239	-0.0342684	0.0318408	-0.0545989	-0.0906427	0.0435904	0.111142	-0.0109258	-0.0393059	-0.105554	0.0131677	0.0108437	0.010917	-0.053993	0.00883234	-0.00600488	-0.0057756	0.0645166	0.0371174	0.0191368	0.0112191	0.0288007	-0.0993537	-0.0121767	-0.0472991	-0.0128631	0.0100926	0.00306444	-0.0283943	-0.00307097	-0.016385
IDH3B_O43837	-0.000646579	-0.0864574	0.00064629	0.0157382	0.0788058	0.00933897	0.0405847	-0.0173316	-0.0597269	-0.0485268	-0.00512873	0.0129156	0.0721022	-0.0211057	0.0584172	-0.0839393	0.0170734	0.0185553	0.0201879	0.029148	0.0157747	-0.0519606	0.0346595	0.0791265	-0.00065119	-0.0319811	-0.0341481	-0.0164642	0.000650897	-0.0255323	-0.0724946	-0.0701168	0.0342342	0.0257291	0.0436757	0.033775	0.00615276	0.034754	0.0378979	0.0286849	-0.0308128	-0.0528544	-0.0295868	-0.0531509	-0.00617911	-0.0254995	-0.0414678	-0.0348514	0.00704056
INTS1_Q8N201																	0.656913	0.336287	0.0828466	0.380847	-0.0201803	-0.109389	-0.200884	0.0199019	-0.179865	0.155657	-0.205044	-0.311599	-0.0437819	0.326817	-0.0862606	0.112997																	0.349534
TLNRD1_Q9H1K6																																	0.176907	-0.0018215	0.0102304	-0.207442	-0.176678	0.133757	0.138745	-0.359248	0.0505996	0.172149	-0.251517	0.0678366	0.0018192	-0.208943	-0.260745	-0.131286
COPG2_Q9UBF2	0.0117248	-0.0907337	-0.000980323	0.0508503	0.0420405	-0.0154075	0.036147	-0.0208662	0.00146635	-0.00845216	-0.0444423	0.00129799	0.00870816	-0.0382821	0.000979657	-0.0167311	-0.0177637	-0.012659	0.046936	-0.0263339	0.0295283	0.029526	0.0105771	0.0388574	-0.00783925	0.00779688	0.0314044	-0.0171632	-0.0462958	-0.0434784	0.0198835	-0.0626966	0.0549485	0.00401364	-0.00129569	0.000602412	0.012621	0.0985964	0.0468366	0.0453944	0.00558286	-0.0812252	-0.000602664	-0.0469765	-0.0132053	-0.0247606	-0.0664061	-0.0300593	0.0316088
COPG1_Q9Y678	0.0118525	-0.0337531	0.0378191	0.0485209	0.0133915	0.0049689	0.036511	-0.00613175	-0.00114057	-0.00115213	-0.000592704	0.0350709	-0.0104885	-0.0229081	0.000592461	-0.0162036	9.93379e-05	-0.010264	0.0230697	-0.0584224	0.0230947	0.0210698	0.00574802	0.0405722	0.0131568	-9.93448e-05	-0.00536747	-0.00203447	-0.0448745	-0.0493094	0.00754175	-0.06479	0.0371022	0.0251395	0.0120942	-0.0169409	-0.0254042	0.0356401	-0.00241162	0.0331632	-0.022569	0.0024076	-0.0291052	0.0207396	-0.0373796	-0.010022	-0.0736368	0.00658077	0.0362159
PIGB_Q92521																	-0.0649329	-0.0794768	0.221474	0.107903	0.0125594	0.00642874	-0.0901568	0.261007	-0.00645751	-0.0570732	0.00793588	-0.0935149	-0.223702	-0.0750218	0.0451696	0.0708255	-0.0734429	0.0568008	-0.131131	-0.0781013	0.159092	0.0397111	0.115133	-0.0506803	0.00363979	-0.003649	-0.01309	0.0178358	0.200011	-0.0351121	0.13288	-0.0635784	0.114037
NAGLU_P54802	-0.105079	-0.0476195	-0.0540684	-0.0211963	0.0954473	0.0151345	0.0531087	-0.105792	-0.0761487	0.0406297	-0.0152949	0.0335554	0.142271	-0.032925	0.0259528	0.122193	-0.0107354	0.0162891	0.018822	0.116381	-0.061955	0.0161174	0.0106561	-0.065603	-0.0681576	0.127891	-0.16902	-0.0791623	-0.0921464	0.113945	-0.036448	0.0900916	-0.102181	0.0459352	0.137106	0.192664	0.00737512	-0.0642185	-0.0105312	0.101732	-0.0367699	0.047628	-0.204485	-0.00741301	0.110117	-0.0766017	0.1004	-0.0754078	0.235988
PDHX_O00330	-0.206552	-0.195945	-0.00891818	-0.104471	0.0482846	-0.186123	0.0682727	0.26914	0.0655632	0.0854533	-0.0175434	-0.0725186	-0.109301	0.00886339	0.104546	0.150572	-0.581454	-0.12764	-0.0791662	-0.0963829	-0.0756536	-0.0306666	0.0617675	0.0300283	-0.121647	-0.183505	0.105372	0.141482	0.144954	0.0324105	0.125378	0.246252	-0.203987	-0.115185	-0.168944	-0.463475	-0.259516	-0.225166	-0.109958	0.10734	0.133214	0.171288	0.222638	0.258411	0.0331473	-0.0339268	0.20764	0.0934569	-0.343063
MTHFD2_P13995	0.0584506	-0.0733574	-0.00282791	0.0126694	0.00715638	0.0433257	-0.023175	-0.0884454	-3.46077e-06	3.46076e-06	0.0108066	0.0185169	0.00229727	-0.0119509	-0.0154983	-0.040167	0.0718665	0.0707817	-0.0125734	0.0269166	0.0108742	0.0299683	0.0113641	0.0241898	0.0600306	-0.0109567	-0.117309	-0.0892907	-0.0497963	-0.0568684	-0.0605762	-0.0449897	0.0165008	0.0489111	-0.00914225	0.0470364	-0.0146276	-0.0055085	-0.0609709	-0.0107499	0.0341225	0.00548755	-0.0242926	-0.0122732	-0.0271533	0.0322826	0.0215715	0.0373118	0.0352599
MTHFD2L_Q9H903																																	0.0661452	0.0539898	-0.0338585	0.250599	-0.305673	-0.0907367	0.0582169	0.182306	-0.121565	0.187898	0.288209	-0.450083	0.00751516	-0.123847	-0.00755452	-0.505258	-0.188341
PCYT1A_P49585	0.0118572	-0.00315499	0.0255088	0.0621941	0.0127858	0.00314811	-0.107883	-0.176253	-0.0676066	-0.010505	0.0253735	0.0823277	0.00434089	-0.0682947	-0.05171	-0.0191459	0.174365	0.0444534	-0.00855953	0.0693239	0.0481101	0.123614	0.058432	0.0123079	0.00850904	-0.011215	-0.18388	-0.0385988	-0.0890758	-0.206093	-0.0284451	-0.0104565	0.157518	0.00406053	0.0581024	0.00765195	-0.0433372	0.0538652	0.00219156	0.0674445	-0.039048	-0.030257	-0.133313	-0.0608785	-0.00219489	0.0399895	-0.318354	-0.190037	0.231825
PCYT1B_Q9Y5K3	0.0583363	-0.0120411	0.0557113	0.0404416	0.0636335	0.0177884	-0.166122	-0.219838	-0.0233177	-0.03666	0.0514899	0.105663	0.0119414	-0.0701446	-0.0417784	-0.0842947	-0.127266	0.0205489	-0.0665631	-0.172747	0.0766701	-0.151957	-0.245993	0.109885	0.260835	0.0756628	0.0318084	0.0377503	-0.130508	-0.0457283	0.0038669	-0.00387729	0.0293385	0.108565	-0.0703678	0.0225791	0.0283877	-0.0342252	-0.0141136	0.0139769	0.0302302	-0.0556433	-0.0492406	-0.168586	0.033167	0.033962	-0.169221	-0.30192	0.0312788
USP34_Q70CQ2	0.0265645	0.0512811	0.0421425	0.0965427	0.0361638	0.0939204	-0.0622137	0.0534656	-0.0539557	-0.0849238	0.0844916	-0.109657	-0.155878	-0.0270628	-0.110169	-0.056033	0.369166	-0.0683728	0.204064	0.0652786	0.16377	0.0719751	-0.096576	0.0935147	0.0699253	-0.0984998	-0.213765	-0.18748	-0.0965368	-0.166294	-0.174693	0.0891028	-0.0630497	0.0338287	-0.0284604	0.00405425	0.0941854	0.0686165	-0.131309	0.0715512	0.0286599	-0.0656843	-0.00406568	0.105733	0.0966938	-0.0294442	-0.309921	-0.238055	0.113785
NRBF2_Q96F24	-0.0864416	-0.101316	0.122263	0.019133	0.0370162	-0.0559881	-0.0606096	-0.0403342	0.0232924	-0.0215273	0.043476	0.11891	0.0531207	-0.0721152	-0.0193902	0.0249732	0.101258	-0.00742721	0.040289	0.163982	0.0351631	-0.16326	-0.177646	-0.125549	0.00738917	-0.0904413	0.0198917	-0.010059	0.0643359	0.0593924	-0.0563236	-0.00943725	0.0426768	-0.030717	-0.01185	0.0117534	0.0561894	0.0139816	0.0157854	-0.0369299	-0.0659841	-0.052235	0.0139839	-0.0565364	0.0313898	0.018802	-0.0381263	-0.0330816	0.0994863
PFKL_P17858-2	0.0318378	-0.0650795	-0.00657349	-0.0107334	-0.0104377	0.0244824	0.0076339	-0.0865363	-0.0203642	0.0280911	0.00654368	0.0185572	0.0462894	-0.0106962	0.0494488	-0.0208542	0.0844518	-0.0231812	0.0525422	-0.0230308	0.0130945	-0.0286289	0.0168391	-0.0461919	0.0148182	0.0193682	-0.0540916	-0.0389097	-0.0188798	0.0168003	0.00450477	-0.00451888	-0.00914733	0.00584518	0.00236261	0.0510728	0.0548916	-0.00236648	0.0404679	-0.051852	-0.0345921	-0.0262096	-0.037628	-0.088898	0.00386868	0.0288854	-0.0111561	0.00656554	0.016205
PFKP_Q01813	-0.000257253	-0.0631371	-0.0301032	0.0153552	0.00794528	0.00446749	0.00242146	-0.0444257	-0.000947331	0.000257207	-0.0538732	0.0121698	0.0542974	-0.0154178	0.0651939	-0.019233	0.066828	-0.0343177	0.103901	0.0171995	0.0237977	0.0237659	-0.00193456	-0.0189116	0.00193197	-0.00238047	-0.0313322	0.0162509	-0.0453384	-0.0814803	0.00499521	-0.0575983	0.0358615	0.00786039	0.0728691	0.0629828	0.0700127	0.0584328	0.0831739	-0.000898854	-0.0176511	-0.00890357	-0.0288435	-0.0191605	-0.00521283	0.000898294	-0.0182397	-0.00481233	0.00882832
PFKM_P08237-3	0.026087	-0.086983	-0.0347328	-0.00966607	-0.0120582	0.010142	0.0152258	-0.0946172	-0.0358075	0.0245265	0.00293474	0.0111854	0.0545466	-0.0118304	0.0516562	-0.00294072	0.0128061	0.015903	-0.0640956	-0.00376552	0.0581864	-0.036701	0.000480513	-0.0789725	0.0716525	0.0558134	-0.0409371	-0.0472992	0.0213072	-0.000480673	0.00692717	-0.0111334	-0.0255042	0.0312661	0.000655625	0.0262613	0.0532232	0.0145824	0.0342404	-0.0887738	-0.0528261	-0.00211408	-0.0182356	-0.0615796	0.0447589	0.0424912	-0.000655923	-0.00840891	0.00182556
PFKM_F8VTQ3	0.336212	0.182222	-0.173686	0.0726288	-0.108294	0.460422	-0.0587786	-0.0241987	0.0237995	0.355116	-0.0349235	-0.114577	0.191397	-0.191246	-0.0860971	0.106557	0.436516	0.176526	0.398721	-0.0135922	0.149548	-0.115644	-0.000403732	-0.0888118	0.401735	-0.194311	-0.182697	0.296761	-0.859229	-0.517119	0.245812	0.000403619
C8orf33_Q9H7E9-2	-0.388349	-0.35315	-0.0533002	-0.0453677	0.139564	-0.109651	0.0439844	0.453801	0.221954	0.208603	-0.163326	-0.0603974	0.0681588	0.107608	-0.0816833	0.401178	-1.0743	-0.322087	-0.0810251	-0.092575	-0.0355129	-0.0142847	0.0260731	0.0141446	-0.293856	-0.207678	0.391464	0.493112	0.568917	0.36367	0.224095	0.441221	-0.569445	-0.283825	-0.281059	-0.750654	-0.402433	-0.369773	-0.0979567	0.263641	0.0917264	0.414948	0.732526	0.673194	0.178391	-0.14314	0.552621	0.226921	-0.424345
SGTA_O43765	0.0669235	-0.0576211	0.0309738	0.0656309	0.0654612	-0.0117241	-0.00209383	-0.0890248	0.0020908	-0.0172038	0.0472957	0.0436094	-0.00432368	-0.00894683	0.00404868	-0.0148585	0.178778	0.0253552	0.0755545	0.0136705	0.00531264	-0.0219668	-0.0240096	0.039768	0.0112408	-0.0875762	-0.0898956	-0.0750992	0.00694267	-0.0427252	-0.0255529	-0.00533228	0.0834912	0.0356678	0.0107111	0.0155888	0.00582136	0.0288453	0.00416018	0.0462857	-0.02316	-0.046217	-0.0647425	-0.0479988	-0.00417221	-0.0565166	-0.0657387	-0.0289939	0.0272693
ODC1_P11926																																																	0.0184376
PGLS_O95336	-0.108273	0.0142949	-0.0142289	0.161346	0.000339626	-0.0207164	-0.0121534	0.148017	-0.164444	-0.000339706	0.190364	0.0233768	-0.030473	0.000893091	0.0278131	-0.0666383	-0.0591317	-0.133327	-0.0724146	0.171188	-0.154476	-0.0234331	-0.207787	0.24803	0.0230586	0.248305	0.163409	0.0913431	-0.148997	0.21766	-0.0735354	0.135997	0.159818	-0.0361119	0.162025	-0.0714718	0.0964995	-0.0149139	0.0147613	0.0516486	-0.479152	0.0483294	-0.193899	-0.07004	-0.25444	0.107444	-0.183053	0.0186432	-0.0311504
CSE1L_P55060	0.0727373	-0.0279312	0.0401246	0.043986	0.0338238	0.0596487	-0.00203404	-0.0807889	-0.0181754	-0.0199521	0.0450488	0.0591349	0.00203118	-0.0580122	-0.0230334	-0.0247647	0.116398	0.0384116	0.0324359	-0.0621641	0.0322359	-0.00230792	0.0209602	0.0562336	0.0355109	0.00230423	-0.170741	-0.190653	-0.148091	-0.199023	-0.0325777	-0.103608	0.10243	0.0550529	-0.0326059	0.0222438	0.0478771	0.0773252	0.0132344	0.0416749	-0.00745913	-0.0278914	-0.0560829	-0.0779458	-0.0251294	0.00742076	-0.117688	-0.0203809	0.0742824
PURA_Q00577	-0.190234	-0.180994	-0.0670683	-0.115086	-0.0827966	-0.27712	-0.0295228	0.245804	0.08748	0.0720199	0.0300724	-0.00328243	0.00327497	0.187853	0.0218125	0.210205	-0.381591	-0.137557	-0.169305	0.0281092	-0.140376	-0.0174056	-0.0607114	-0.118066	0.0171981	-0.135039	0.340764	0.542109	0.398949	0.269145	0.152904	0.366615	-0.399012	-0.303819	-0.342387	-0.422348	-0.403159	-0.403263	-0.177257	-0.00899361	0.00893789	0.245865	0.289043	0.285267	0.0330496	0.0538699	0.394402	0.246693	-0.29193
PURB_Q96QR8	-0.185496	-0.0353513	-0.162579	-0.189184	0.0322858	-0.210205	0.0123403	0.233403	0.213414	0.0999276	0.0150939	-0.0434959	-0.0314498	0.182611	-0.0124468	0.0493247	-0.22162	-0.303875	-0.37944	-0.0744893	-0.20276	-0.0862782	0.193318	-0.03469	0.0338754	-0.13783	0.27318	0.321798	0.117203	0.193136	0.0834067	0.378749	-0.336121	-0.156015	-0.29345	-0.229446	-0.183831	-0.338624	-0.149146	-0.013626	0.0134985	0.247704	0.33284	0.180582	0.131297	0.0989782	0.437647	0.287372	-0.139415
PURG_Q9UJV8
PAXX_Q9BUH6	0.00248282	-0.0857756	0.00765613	-0.0175448	0.0169188	0.0353443	-0.0238722	-0.0743924	-0.0330164	-0.0024871	0.00516955	0.0312706	0.0514986	-0.0211828	0.0304391	-0.00511401	0.0219771	0.060558	0.0432447	0.00741731	0.00529605	-0.0156954	-0.00531556	0.0597521	0.0458925	-0.0822327	-0.0263009	-0.0641309	-0.0265102	0.042819	-0.0301332	-0.0175775	-0.0027091	0.00270403	0.0122137	0.0252109	-0.0140115	-0.0316401	0.076215	-0.0813923	-0.00609193	-0.038198	-0.0894255	0.0104753	-0.0585501	0.0315439	0.0306425	0.0432604	-0.0311659
GTF2H3_Q13889	-0.114338	-0.128932	-0.0760014	-0.00734172	0.0197636	-0.112388	0.0180845	-0.0360208	-0.0378701	0.00730455	-0.103484	0.0702031	0.0529528	0.059257	0.0663232	0.0567382	-0.428165	0.194957	-0.430462	0.252841	0.0596281	0.014488	-0.0146349	0.130375	-0.133605	-0.170055	-0.379922	-0.29939	-0.0446357	0.0208487	0.0581385	0.172397	-0.326659	-0.0141048	-0.283098	0.0568798	0.0796668	0.0508942	-0.0836705	0.00400015	-0.1756	0.00621157	0.113154	-0.118663	-0.00401128	0.0379848	0.0399634	-0.182784	0.119268
DIP2B_Q9P265	0.0351206	-0.062255	-0.0221711	-0.00034023	0.00818855	0.0221649	0.00034015	-0.061049	-0.0189403	0.0185833	0.0170365	-0.0169227	0.0488263	-0.00230244	0.00864714	-0.00808221	0.106203	-0.0186144	0.0579533	0.0313443	-0.00848699	-0.0159744	0.0121563	0.0499552	0.0486446	0.0192355	-0.0214652	0.00463297	-0.0398505	-0.0046479	-0.00506907	-0.0560111	0.0651481	0.0580054	0.0383043	0.0669657	0.0634032	0.0540231	0.0242597	-0.00647581	-0.0397474	-0.0445039	-0.0654419	-0.0725888	0.00550057	-0.0114585	-0.0246089	-0.00552163	0.0447683
DIP2A_Q14689	-0.16251	-0.0536992	0.145853	0.0900707	-0.176704	0.108981	-0.0762505	0.0662136	-0.015863	-0.0648779	0.104407	0.0480177	0.162967	-0.0568279	-0.0758655	0.0156904	-0.040741	-0.0557843	0.0717293	0.134929	0.0743429	-0.0117399	-0.0323967	-0.00551268	-0.118292	-0.0152964	0.0540857	0.0598396	0.0368618	0.00871209	0.00549169	-0.130648	-0.0148717	0.0346234	0.0607802	0.0250029	0.0169713	0.0677594	-0.0208645	-0.0149436	-0.00780171	0.0394611	-0.027437	0.00793108	0.00775975	-0.162847	-0.129259	-0.0598821	-0.0244355
NEK7_Q8TDX7	-0.0276765	-0.0300863	0.008558	0.0334026	0.0841067	-0.015977	-0.0975454	-0.0843544	-0.0235212	-0.00483258	0.0208745	0.00496832	0.133215	-0.00350574	0.121309	0.00349724	0.00190015	0.003336	-0.0553172	-0.0795619	0.152791	-0.0196915	0.0256661	0.00902845	0.0455119	0.0347218	-0.0271682	-0.0967155	-0.0856353	0.0139853	-0.00190265	-0.0514119	-0.0783559	0.0394306	0.068491	0.150874	0.0915661	0.00376095	0.0199331	0.0434063	-0.0786168	-0.0623387	-0.00377078	-0.007895	-0.109994	-0.0434745	-0.166376	0.0263861	0.0117117
LCP1_P13796	0.0760228	-0.0174552	0.00378977	-0.00360756	-0.0227764	0.0337277	-0.00274647	-0.0376066	0.0338879	0.000351024	0.00352253	-0.0049465	0.0172032	-0.000351109	0.00832301	-0.0252822	0.0227146	0.0124357	0.0229783	0.0315521	0.00243116	-0.0246959	0.00926307	-0.0116145	0.0123807	-0.006093	-0.00886505	-0.00243527	-0.0262945	0.00925389	-0.00866289	-0.00499633	-0.0151159	0.0305236	-0.0207635	0.0441624	0.00955219	-0.0213634	0.0349783	-0.00961586	-0.0190657	-0.0137185	-0.0563864	-0.0368541	0.0249228	0.0536801	0.0290168	0.0109121	-0.03775
PLS1_Q14651	-0.0019011	-0.0681678	-0.0173831	0.0018986	0.00374517	0.0108489	0.0128306	-0.0366867	0.013778	-0.0648661	0.0480052	0.00615069	0.00458583	-0.0584969	-0.0360968	-0.0736365	0.143768	0.00311838	0.089763	-0.043398	0.0556106	0.0185062	0.0117885	0.0890683	0.0349429	-0.00312514	-0.108344	-0.0714698	-0.0141955	-0.0329031	-0.0273957	-0.0655065	0.0393989	-0.000808672	-0.00372365	0.0378787	0.0628853	0.0348899	0.0346576	0.0372351	-0.0170897	-0.0647224	-0.0151557	0.0167869	-0.00823263	0.000808219	-0.110312	-0.0446637	0.0774111
PLS3_P13797	0.019726	-0.0604652	-0.00134269	-0.0189205	-0.0110448	0.0461614	0.018141	-0.0684954	0.00136216	0.0238813	0.00134144	-0.0127778	-0.0348564	0.00374945	0.0276969	-0.0680002	0.0242631	0.0218959	0.0922515	-0.0192719	-0.00429409	-0.0500934	-0.0223761	0.0187563	0.00428134	0.0259476	0.0232523	0.0502113	-0.128189	-0.064759	-0.00435186	-0.0345272	0.0337449	0.0144927	0.00787649	0.0272121	0.0207585	0.0121323	0.0354994	-0.0191692	-0.0140836	-0.0364682	-0.00791973	-0.0331521	-0.0206362	0.0128244	-0.0429905	-0.0221772	-0.0439546
PLS3_H7C4N2
CENPE_Q02224	-0.019573	1.02835	0.047054	-0.246136	-0.183391	0.243321	0.201931	0.0848994	-0.0276491	-0.278171	0.019311	0.175902	-0.14647	-0.220787	-0.132575	0.123254	-0.558424	-0.212654	-0.017	0.113062	-0.161175	-0.314958	0.134701	0.00428023	-0.00429296	0.0403624	0.0814304	0.303163	0.29439	-0.190124	-0.191068	0.11262	0.306605	0.366328	0.412932	-0.132062	-0.546213	0.268909	0.34463	0.230544	0.185826	-0.0254219	-1.31014	-0.505735	-0.296983	-0.427839	0.0249817	-0.795219	-1.1304
TANK_Q92844	-0.0100365	-0.10624	0.111733	0.0669277	-0.0147015	-0.00970548	-0.00459433	-0.0939926	-0.00475458	0.0247335	0.0371659	0.0679395	0.0799715	0.0931546	0.00457974	-0.00647895	0.0205221	-0.0700797	0.02151	0.0333029	-0.0425433	-0.12568	-0.0226019	-0.189811	-0.00459201	-0.0940568	-0.147747	0.00457744	0.146704	0.124025	0.0917911	0.0555011	-0.0582582	-0.0283262	-0.0208476	-0.0205564	-0.102802	-0.0833545	0.0217529	-0.0689246	-0.063365	0.0361176	0.0452952	0.0930646	0.0327044	0.0202676	0.0469969	0.115805	0.07512
GLOD4_Q9HC38-2	0.0437693	-0.0700412	0.00839525	0.0100066	0.0265678	0.10258	0.00987602	-0.0915931	-0.0320083	-0.0628382	0.00901204	0.0106433	-0.00844439	-0.0415755	-0.0580945	-0.075201	0.162661	0.0599329	0.0489774	-0.0305762	0.0362653	0.0129599	0.00852711	0.0390969	0.0609616	-0.00857781	-0.0982042	-0.165338	-0.0551808	-0.0527119	-0.0449948	-0.104892	0.116379	0.0254815	0.0402056	0.0775853	0.0351987	0.117989	0.0267591	0.048402	-0.0461352	-0.0800757	-0.0740799	-0.0259396	-0.0746871	-0.0348992	-0.14541	-0.0704323	0.123425
POP1_Q99575	-0.078735	-0.114047	-0.036594	-0.0470371	0.0107135	-0.0606076	0.0065347	0.0305531	-0.00656443	0.0242685	0.0268464	0.0162308	0.0381653	-0.0387492	0.0214084	-0.0163991	-0.057346	-0.081515	-0.00843934	-0.012278	-0.0171854	-0.00786094	-0.00327675	0.00652665	-0.0172719	0.024072	0.0536921	0.0960616	0.0215233	0.00326932	0.0120851	0.0432257	0.0120255	0.0203372	0.0814156	0.00265847	-0.0209936	-0.0344432	0.0506556	0.0152357	0.00269997	-0.00266338	-0.0589909	-0.0410157	0.0312122	-0.0511798	-0.0124691	-0.0862741	-0.0264248
AGK_Q53H12	-0.00571388	0.05476	0.0188553	0.0222382	-0.00160831	-0.0712193	-0.109125	-0.139026	-0.0341404	0.0261588	-0.0518857	0.00194257	0.0234518	0.0354416	0.00160652	-0.0392583	0.13783	0.00410545	0.0797588	0.143539	0.0949687	-0.00739576	-0.0182447	-0.00411717	0.124914	-0.0794273	-0.114981	-0.0768947	0.0249984	-0.016472	-0.0156751	0.0398769	0.0247436	0.0494007	-0.00209289	0.0343236	-0.00104088	-0.00782088	0.0276539	0.0739435	-0.00494595	-0.0515919	-0.0294451	0.00687991	0.016613	-0.0196539	-0.00446503	0.00104012	-0.00946693
UBE3A_Q05086	-0.00166311	-0.0600694	0.00393919	0.0359933	0.0156641	-0.000105116	0.00125733	-0.070225	-0.00529185	-0.0166841	0.0071311	0.00240171	0.0192907	-0.0250679	0.000105108	-0.0337703	0.00167504	-0.056053	0.0522574	-0.0302651	0.0187937	0.0408745	0.0175208	0.0283346	-0.0395783	0.0229651	0.0154401	-0.0481324	-0.0081977	-0.0282448	-0.00167699	-0.0959905	0.0646097	0.0104994	0.00516202	0.0373446	0.0382673	0.0585577	0.0205074	0.0130887	-0.00518055	-0.00845097	-0.0120898	-0.0319529	-0.0337727	-0.0165766	-0.037085	-0.0213423	0.0488145
DAGLB_Q8NCG7	0.0543682	-0.155984	-0.0287668	0.0544772	-0.0280482	0.00124805	-0.0392159	-0.0517105	-0.0750907	0.0695754	-0.00124913	0.0214401	0.120751	-0.0196802	0.0600719	0.0209871	0.278833	0.0052746	0.12112	-0.0552177	0.131725	-0.0190995	-0.0703289	0.00742502	0.0635068	-0.152798	0.0345808	-0.296305	-0.00529396	0.142116	-0.0333103	-0.226355	0.00219173	-0.0955176	-0.00976641	0.0316052	0.045216	0.0104692	-0.0515932	0.0256854	-0.091761	-0.00219507	-0.0850364	-0.0583581	0.0104899	0.0135047	-0.174229	0.03514	0.0609746
NUMA1_Q14980	-0.0282818	-0.108818	0.0123179	-0.001545	0.0600037	-0.130903	0.057997	0.18401	-0.00649271	-0.0401155	0.0373407	0.00154334	-0.0561694	-0.045412	0.0183288	0.0360436	-0.264831	0.00278421	0.0205713	0.02226	-0.00278959	0.00707518	0.00390653	0.00509472	-0.124199	-0.125957	-0.238267	-0.144711	-0.022576	-0.109089	0.0127622	0.122395	-0.042816	-0.00802958	-0.149094	-0.239109	-0.10768	0.00798514	-0.023759	0.283976	0.109694	0.124405	0.106962	0.0714076	0.0419275	-0.0134262	0.069661	-0.19592	-0.158096
EXOC5_O00471	0.101245	-0.0649106	0.0325708	0.0299205	0.0437346	0.0440903	-0.0382485	0.00687565	-0.0605337	-0.126523	-0.000643983	0.000643696	0.00758011	-0.0118969	-0.110301	-0.0282439	0.144957	0.102284	-0.0896468	-0.0211047	0.0288452	0.14314	0.123542	-0.00201312	0.0591166	-0.077488	-0.20326	-0.226062	-0.0952115	-0.163013	0.0419998	0.00201031	0.0812237	0.0294009	-0.000729946	0.0439402	-0.0259477	0.0146342	0.0223613	0.156355	-0.0458764	-0.0107227	0.034119	-0.00494265	-0.00737485	-0.0279016	-0.0168365	0.000729576	0.112882
GCN1_Q92616	-0.14274	-0.282872	0.105111	-0.0837223	0.0119824	-0.162375	-0.0253292	0.394965	0.0930153	0.00229746	-0.00230113	0.0261121	-0.127195	0.0829186	-0.0683513	0.102385	-0.36504	-0.159181	-0.127609	-0.101424	-0.00937987	0.0386081	0.00261443	0.00334473	-0.143117	-0.168668	0.014213	0.113193	0.221727	-0.00261918	0.0626902	0.226434	-0.270315	-0.245137	-0.194324	-0.435505	-0.32031	-0.243208	-0.0532257	0.323553	0.109419	0.358647	0.669028	0.622511	0.0523656	-0.0568505	0.516314	0.0513317	-0.226924
MTMR4_Q9NYA4
MTMR3_Q13615	-0.178423	-0.210041	0.167808	-0.0647283	0.0218209	-0.00894516	0.118034	0.125002	0.027997	0.00889004	0.0206589	0.0963414	-0.0650728	-0.342427	-0.0802707	-0.105395	0.0415454	0.150187	-0.094859	-0.0143404	0.0691492	-0.12686	-0.07815	0.00959838	0.0533404	-0.113255	-0.00966267	-0.0203783	0.0173866	0.0463802	0.0272727	-0.117197	-0.0232546	-0.075536	0.0910195	0.180779	0.114639	0.0897993	-0.047183	-0.000946995	0.000946374	-0.0195469	-0.0452613	0.144945	0.0327254	0.0627966	-0.110612	-0.0209134	-0.0469022
ADCK5_Q3MIX3
PACSIN2_Q9UNF0	0.140535	-0.0821404	0.122855	0.00696139	0.11214	0.0943054	0.0312498	0.08548	-0.0635118	-0.198605	-0.0185428	8.4295e-05	-0.0367027	-8.42999e-05	-0.161584	-0.105893	0.203245	0.0687736	0.0295629	-0.0738762	0.162832	0.0902238	0.0981036	0.102154	0.0779837	-0.0707244	-0.139151	-0.175974	-0.0301814	-0.131361	-0.0494617	-0.0639874	0.0864668	-0.0533904	0.125619	0.0125872	0.0568812	0.100416	-0.012698	0.113839	-0.115125	-0.0768802	0.0949013	0.038537	-0.0848923	-0.0961424	-0.188188	-0.199197	0.107659
SNX2_O60749	0.0808866	-0.0709095	0.0535499	0.0199165	0.0852819	0.0233683	-0.098788	-0.208055	0.0126349	-0.0655461	-0.0754084	-0.0423373	0.0695426	0.0174358	-0.0127465	-0.0165301	0.0815212	0.0950166	-0.0927953	-0.115397	0.106733	0.0797797	0.0852212	0.0913244	0.119043	0.0540107	-0.295959	-0.368643	-0.154737	-0.276646	-0.0561116	-0.103681	0.108266	0.051345	0.0831728	0.119135	0.036328	0.101671	0.0213546	0.0532165	-0.0216755	-0.0548297	-0.0505444	-0.0277895	-0.0533355	-0.105415	-0.108213	-0.0689052	0.102892
SNX2_O60749-2	0.0419021	-0.209257	0.0767133	-0.184426	0.0801685	0.0710471	-0.0651859	-0.25986	0.118084	-0.153715	-0.201526	-0.171001	0.30957	-0.00716052	0.176411	0.00712515																	-0.0212013	-0.0137263	0.0912307	0.229266	0.368275	0.0659373	0.0506041	-0.00562546	-0.243614	-0.273197	0.211228	0.00560361	0.155654	-0.0240387	-0.120105	-0.0353657	0.219092
SNX1_Q13596	0.0649464	-0.0267503	0.0459882	0.027716	0.0835464	0.0744915	-0.139268	-0.1593	0.0223335	-0.0320291	-0.0340749	-0.0358233	0.0370393	0.00789256	-0.00793598	-0.0304932	0.279712	0.132222	-0.138206	-0.272457	0.180442	0.1132	0.131869	0.16009	0.108319	0.0923078	-0.566864	-0.642251	-0.299726	-0.338856	-0.0986201	-0.115899	0.0523261	-0.00114887	0.0704264	0.0697247	0.00595621	0.0529195	0.0337859	0.0504762	0.00114795	-0.052361	-0.0253189	-0.0256518	-0.0321426	-0.107825	-0.112648	-0.0552461	0.162457
RBBP6_Q7Z6E9	-0.0459418	-0.0847434	-0.0947541	0.0594945	-0.036327	0.0652915	0.0661925	-0.101419	-0.0443368	0.0561304	-0.00221823	0.00221482	0.0180441	-0.183024	0.0583496	0.129929	0.0606673	-0.113423	0.0807292	-0.0489035	0.0162901	0.144934	0.013339	-0.0220556	-0.0134635	-0.0353011	0.0411044	-0.0693495	0.0229547	-0.155339	0.0605277	-0.0658398	0.195982	-0.263182	0.143032	-0.136657	0.0987795	0.13994	-0.0609878	-0.0428385	0.147849	0.422773	0.041603	0.103027	-0.103449	-0.536039	-0.234519	-0.106098
GRHPR_Q9UBQ7	-0.00168438	-0.0160172	0.0102492	0.0106538	0.0776827	-0.0891716	0.00664188	-0.00682847	0.00418968	-0.0295506	-0.120159	-0.000701781	0.0363191	0.00070144	0.0377906	-0.0295695	0.214844	0.0619862	0.173414	0.107228	0.0564323	0.00436283	-0.0437609	-0.0123366	0.0270202	-0.0325955	0.00782612	-0.0342615	-0.0095088	-0.00437607	-0.0752384	-0.100396	0.06645	0.0298593	0.0515442	0.0770342	0.119481	0.0787082	0.0532792	-0.00225363	-0.00682963	-0.0641944	-0.014357	-0.0817066	0.00225011	-0.0482013	-0.0689618	-0.0487809	0.0198323
GPD2_P43304	0.00475486	-0.0836564	-0.0310283	-2.53583e-05	-0.023574	-0.00365388	2.53578e-05	-0.0752675	-0.0167828	0.0159767	0.00352047	0.0478326	0.0460988	-0.00476364	0.0418839	0.00152529	0.0332749	-0.0143384	0.00813998	0.00858003	-0.00220322	-0.109421	-0.0541207	-0.0601912	0.0175171	-0.0189721	0.0323601	0.0141448	0.00219986	-0.0104089	-0.00807025	0.0175945	-0.0510903	0.0114154	-0.0105053	0.0148192	0.031466	-0.0205836	0.00688898	-0.067177	-0.0294617	-0.00129269	-0.0291276	-0.0127409	0.0125128	0.03746	0.00129153	0.00295119	-0.0225948
SHC1_P29353-6	0.00183808	-0.0605706	-0.016343	0.0274212	0.0736494	-0.00184042	0.0282728	-0.051135	-0.0305281	-0.0127555	0.0101534	0.0141216	0.0420645	-0.0177309	0.0445877	-0.0658469	0.00898693	-0.0470293	0.0809934	0.0241401	0.0783713	-0.00904327	-0.0223893	-0.0474039	-0.0308383	0.0167409	0.016362	-0.0440789	0.00954906	-0.0371744	-0.0247717	0.0176514	0.0653091	0.0344481	-0.0251112	0.01747	0.0985442	-0.0254825	0.0290289	-0.09232	-0.0339308	0.0469009	-0.0132192	-0.0664416	0.0130991	0.0700529	-0.0155281	-0.0507283	0.0261836
SHC1_P29353
STIM1_Q13586	0.0254793	-0.12676	-0.0263927	0.0426337	0.0275211	0.0465488	-0.105193	-0.180055	-0.000370366	0.00804769	-0.0207383	0.00587528	0.000370271	0.0129214	-0.00416664	-0.0973322	0.0993031	0.0715871	0.0904896	-0.0190876	0.016698	0.0268056	0.00155038	-0.00155204	-0.00736897	-0.0776951	-0.19277	-0.198213	0.0131032	-0.028627	-0.010456	0.055784	0.0476884	0.0297634	0.00797815	0.0476351	0.0228376	0.0642994	0.0378137	0.0436563	-0.0321994	-0.0257424	-0.0190353	-0.036539	-0.030456	-0.00802251	-0.0917587	-0.0583443	0.0461646
STIM2_Q9P246-2
RBM33_Q96EV2	-0.0311305	-0.0267337	0.0244523	0.049849	-0.00446829	-0.0430383	-0.0557408	-0.0540845	0.0787726	-0.00964981	0.0164172	0.00445449	0.0391829	0.00797343	-0.0315303	0.0354183	-0.00563546	-0.00107145	-0.0967304	0.00926225	0.0954866	-0.0222907	-0.0232841	0.0481065	-0.011591	0.00107066	-0.00870391	0.0172075	0.0415623	0.0188368	0.0282489	-0.0380864	0.106494	0.0757182	0.0152964	0.0328443	-0.0331904	-0.00255968	0.0291827	0.0306791	-0.103374	0.00255515	-0.100312	-0.0543867	-0.0176435	0.0420563	-0.140443	-0.212923	0.0390093
IWS1_Q96ST2	0.0759134	-0.0851421	0.0205249	-0.0155639	0.161914	-0.103309	0.00901324	0.0265243	-0.0460073	0.00317648	-0.0127261	0.0568769	0.00493369	-0.0584774	-0.00318349	-0.0165955	0.0135109	0.0645199	-0.017243	-0.00491339	-0.0217318	0.00489672	-0.035696	-0.0090419	-0.0362119	-0.131205	-0.116317	0.0092229	0.14352	0.0723939	0.00579763	0.0371634	-0.00183635	-0.0189335	-0.0319789	0.00648103	0.0843359	0.0756824	-0.0135263	0.00183402	-0.143048	-0.0764369	0.124034	0.114404	-0.0349785	-0.0353752	0.33588	0.335602	0.0882321
PIK3C2A_O00443
LIN28A_Q9H9Z2	0.224623	0.0092621	0.113423	-0.00932195	0.263895	-0.362809	0.191406	0.127716	-0.288844	-0.112151	0.192467	0.0356532	-0.132242	-0.3699	-0.290681	-0.0292671	0.159252	-0.0937164	0.20275	0.121635	0.11374	0.158405	0.0226964	-0.0740107	-0.159097	0.0404335	-0.0638538	-0.0194879	0.0192282	-0.0718801	-0.170634	-0.0258334	-0.0477373	-0.15056	0.0589025	-0.252814	0.189727	-0.506945	0.0867999	-0.465912	-0.539198	0.356592	0.0462082	-0.693482	0.3279	0.0466036	-0.683713	0.115803	0.000459876
LIN28B_Q6ZN17	-0.0398673	-0.130892	0.000426447	-0.035294	-0.00687655	-0.119902	-0.0131608	0.108737	0.124187	0.0521999	0.0345623	-0.000426573	0.0164124	0.104012	-0.027448	0.067765	-0.111006	-0.000440523	-0.0564299	0.0844536	-0.0482714	-0.0542177	-0.0508502	-0.0769973	0.0199286	0.000440389	0.0769721	0.0779149	-0.0219366	0.042553	0.00458438	0.0881514	-0.0329914	-0.110334	-0.0613655	-0.154668	-0.110028	-0.0789882	-0.00230756	0.0356977	0.0329241	0.165567	0.154111	0.14842	-0.00802487	0.00230387	0.185135	0.126659	-0.0750115
TPM1_P09493-4	0.0152912	-0.0846617	0.0297752	-0.00147846	-0.0156427	0.0172768	-0.00328533	-0.030296	0.879454	0.037256	0.00147695	0.00592995	0.00654252	-0.0402619	-0.01439	-0.00743083	0.0481973	0.00948271	-0.00844047	0.00156623	-0.0121817	0.00645123	-0.0142833	-0.0181644	-0.00156794	0.066395	0.0715032	0.0616868	-0.0413521	-0.0317607	0.0389642	-0.046366	0.0601022	-0.0171796	0.0351742	0.0320918	0.0559431	-0.0334253	0.0169866	-0.0317749	0.0804893	-0.0171044	-0.0559057	-0.00251882	0.0143157	0.00251443	-0.0186793	-0.0132778	0.00742278
TPM2_P07951	0.00959053	-0.0768049	0.0962059	-0.0167292	-0.0113705	-0.0372782	-0.0155967	0.083855	2.14812	0.0623764	0.0267713	0.0223695	0.00492816	-0.0418222	-0.0761971	-0.00494505	-0.0193424	0.125624	-0.368437	0.00630163	-0.197318	0.0425571	-0.0168821	0.023224	-0.0584302	0.226785	0.116725	0.118394	-0.0901221	-0.0026793	0.00267434	-0.0829052	0.0241125	0.0566321	0.0382364	-0.0756365	-0.166258	-0.0684031	0.0230822	0.00328108	0.160078	-0.0657792	-0.362872	-0.21625	-0.00328856	0.0307537	0.0256646	-0.180882	-0.166095
TPM4_P67936-2	0.153578	-0.0363788	0.0592882	-0.0170318	-0.0885451	0.121796	-0.0604195	-0.0987434	0.0339211	0.0168331	0.0353803	-0.0299536	-0.0173287	0.0175955	-0.0653326	0.0170911	0.0903753	0.0473435	0.0619021	0.00894972	-0.0254673	-0.100261	-0.0568801	-0.0721023	0.0776578	0.00424917	-0.0534382	-0.0036432	-0.0673621	-0.00638107	0.00363402	0.0324174	0.14996	-0.0199287	-0.0241817	-0.0188867	0.000422709	-0.0966125	-0.0413105	0.0537968	0.165647	0.0426792	-0.0130352	0.212413	-0.000422833	0.0367593	-0.0117909	0.127296	0.230934
TPM3_P06753-2	0.132655	0.00089668	0.0571996	0.0176857	-0.051757	0.0409365	-0.0164388	-0.0427519	0.1947	0.0134356	0.0467432	-0.00656212	-0.0128985	-0.000897238	-0.0701345	-0.0161064	0.118278	0.0760541	0.0159068	0.0265768	-0.088898	-0.0689406	-0.0476038	-0.0720275	0.0636381	0.0323034	-0.00631682	0.0307567	-0.0883024	-0.0380279	-0.0163159	0.00628929	0.0580091	-0.00286269	-0.00303897	0.00285702	0.0383016	-0.058616	-0.0082955	-0.0171296	0.0112232	-0.0072971	-0.0595565	0.0166289	0.013963	0.0126809	-0.0160783	0.00935469	0.161596
TPM3_P06753-4	-0.0107969	-0.0678285	-0.0338896	0.0219257	0.000246578	0.0395963	-0.0445082	-0.0592385	1.93143	0.0603367	-0.156247	0.0214832	0.0201481	-0.00024662	-0.0177375	0.119427	0.0217889	0.00391364	-0.026937	-0.100049	-0.314499	0.00648843	-0.020626	-0.0660289	0.0424051	0.0589926	-0.186741	0.0131623	-0.100742	-0.00392429	0.026316	0.0364277	0.107889	0.041727	0.00712104	0.103344	0.0138907	-0.129629	-0.0663767	-0.119841	-0.0544034	-0.0299351	-0.0485891	-0.0500507	0.03774	-0.00715636	0.0267036	0.109753	0.0129857
TPM1_H7BYY1	0.0293892	-0.0771555	0.0633311	-0.00511372	-0.0299061	-0.0298002	-0.045349	-0.0900854	0.00824052	0.0357113	0.0257964	0.0406367	0.0508825	-0.00821595	-0.000197189	0.000197162	0.101174	-0.067481	0.07434	0.00934762	-0.0505128	-0.172535	-0.0895111	-0.0732536	-0.00464861	-0.00345067	0.00344243	0.0813909	0.0359903	-0.0251298	0.0560913	0.0167773	-0.143269	-0.00139474	-0.142426	0.0132649	0.0889454	-0.0429901	-0.0308412	-0.0437554	-0.0408344	0.0161914	0.0013934	0.0483022	0.0766183	0.0392302	-0.0425673	0.0707302	0.0392739
TPM4_A0A2R8Y5V9	-0.0147745	-0.100552	0.0208678	-0.000198681	-0.0100398	-0.0459367	-0.0178094	-0.0864877	0.0048983	0.0504515	0.000198654	0.0126819	0.0444563	-0.0135334	0.0303496	0.00212372	-0.0579861	0.0123258	0.00965039	0.0143331	-0.0842194	0.0561586	-0.0653105	0.0317954	-0.0165458	-0.00971537	0.0502764	0.0359879	-0.077264	-0.020826	0.0719869	-0.0730319	0.042209	0.0222368	0.037751	-0.0428457	0.0194634	-0.0348151	-0.0165481	-0.058027	-0.0122643	-0.050725	-0.147133	-0.0258197	0.0355079	0.0142348	0.0244756	0.0121609	0.0540907
CCDC57_Q2TAC2	0.0389188	-0.12953	0.0302197	-0.00097635	-0.0347514	0.0708463	0.00731026	-0.0573879	0.0114003	0.0199786	-0.0153547	-0.0276036	-0.0424058	0.000975689	0.0470359	-0.0164268																	-0.0676829	-0.179114	0.0345871	0.101759	0.242155	0.282021	-0.0270186	-0.134249	-0.336885	0.0265219	0.123719	0.153538	-0.0761037	-0.201271	-0.147486	0.0368249
CDC73_Q6P1J9	-0.262355	-0.236092	-0.0219668	0.112035	0.127184	-0.146269	-0.102438	0.119308	0.246016	-0.272155	-0.655454	0.156503	0.0216373	0.225539	-0.349243	0.153166	0.418914	0.343497	0.277888	0.399957	-0.0720393	-0.353932	-0.447016	-0.284869	0.162604	-0.207149	-0.447707	-0.169402	0.192972	0.0686125	-0.132137	0.339985	-0.613965	0.372305	-0.456547	-0.329455	-0.704797	-0.43849	0.0544121	0.41567	0.12178	0.0418415	0.152805	-0.3384	-0.390885	-0.0430914	0.0608411	0.114792	-0.0975065
DNAJC6_O75061-2	-0.0321133	-0.0429857	0.33705	-0.00390545	0.0644707	0.00389491	-0.0332626	-0.140604	0.132007	-0.124637	0.0242594	0.203322	0.01508	-0.16659	-0.0333904	0.0325876	0.0948053	-0.0126855	0.122193	0.0515124	0.086871	0.0301648	0.0322643	0.00106539	0.104476	-0.0569053	-0.0331467	-0.00691525	-0.0413836	-0.0755746	-0.00106618	-0.00472399	0.0544307	0.0463713	0.0288227	-0.00829461	0.00824719	0.067963	-0.0266971	-0.0200569	0.0120878	-0.0557214	-0.0486787	-0.0761436	0.0426456	0.0251037	-0.0915334	-0.0753322	0.108535
DUSP3_P51452	0.0355323	-0.00242777	0.0982039	0.0985934	0.00242369	0.0384093	0.0136784	-0.0245224	-0.0564028	0.0849841	-0.00464345	0.0307072	-0.111439	-0.0650318	-0.0738688	-0.0351566	0.100699	0.00183608	0.24214	0.0296794	0.0532045	0.0472997	-0.0487114	-0.00183842	-0.0684945	-0.0816027	-0.00193586	0.0244497	0.00969804	-0.138469	-0.0914971	-0.0553961	0.0778456	0.0643994	0.00843637	0.0850081	0.0765038	0.19227	0.0470127	-0.00158791	-0.0270863	-0.0267181	-0.11888	-0.0954002	0.00158616	-0.0124089	-0.0349168	-0.0870138	-0.0119685
VDAC3_Q9Y277	-0.0111498	-0.104782	-0.0366336	0.002669	0.0016713	-0.0126307	-0.000231315	-0.0986317	-0.0303225	0.0365091	0.000231278	0.0650438	0.0521805	0.0110459	0.0796485	-0.00739263	0.0493446	-0.026746	0.0499368	-0.0197555	0.0152723	-0.0523102	-0.0247305	-0.0640692	0.0191623	0.016702	0.0581956	0.0413833	-0.0453263	0.00502655	-0.00504413	-0.0450113	-0.0130438	0.015794	0.0141344	0.0181531	0.00194389	0.0491368	0.0636502	-0.11241	0.00150957	-0.0340689	-0.0716769	-0.0758176	-0.0272621	-0.00151116	0.00900856	-0.00989168	0.00490093
VDAC1_P21796	0.00418871	-0.0942284	-0.0310055	-0.00200861	-0.0052983	0.00200582	-0.00587866	-0.0724459	-0.00768855	0.0419989	-0.0209637	0.0335536	0.0530923	0.00818594	0.0668899	0.0262421	0.0393888	0.00344837	-0.0141053	0.0181879	0.0003029	-0.0881734	-0.0366729	-0.0378618	-0.000302963	0.0172537	0.06214	0.048413	-0.00696804	0.0406124	-0.00707493	-0.0103273	-0.026647	0.0133285	-0.00235253	0.0430778	0.00510265	0.00992896	0.0294687	-0.0501481	0.0023487	-0.00609113	-0.0641092	-0.0628333	-0.00379394	0.0563284	0.0363828	-0.00466366	-0.0712538
VDAC1_C9JI87	0.14764	0.0322316	0.109044	0.0321026	-0.0719878	0.264756	-0.0128894	-0.291072	-0.104	0.0271212	0.234498	0.0127753	-0.174318	-0.201171	-0.210818	-0.0535249																	-0.240635	-0.0892724	-0.322205	0.00152667	0.230248	-0.238261	-0.253856	-0.180454	-0.171251	-0.00152829	0.411722	0.138032	0.259413	0.0141063	0.0727232	0.329937	-0.00731454
WIZ_O95785	-0.0797549	-0.100409	0.00018185	-0.0520373	0.0500076	0.0651353	-0.038027	-0.033131	0.0317703	0.0876473	-0.000181873	0.0458256	-0.0285192	0.0562181	0.0139404	-0.0133002	-0.0346087	-0.0476598	0.042937	0.0185475	0.137819	0.0318919	0.0282553	-0.00246068	0.00160133	0.00775085	-0.113887	-0.138976	0.0326933	-0.0510877	-0.00160311	-0.042852	0.0412836	-0.00638964	-0.0343222	0.0138116	-0.0115645	0.00636147	0.0147507	-0.0423671	-0.0296455	0.00754132	-0.0218861	0.0288004	0.0093356	0.0360235	-0.0120658	-0.0408222	0.0336809
WIZ_O95785-3	-0.398631	-0.17503	0.00851568	-0.192975	0.0705815	0.0569171	0.120697	0.178489	-0.00678166	-0.021643	0.262293	-0.153024	0.0533378	-0.20322	0.00674993	-0.114417	-0.122321	0.047702	0.121036	0.0179541	0.159647	0.166127	0.0678036	-0.0286698	-0.0181803	0.21531	-0.0478031	-0.16191	-0.0946849	-0.288239	-0.12038	0.0810886	0.141262	0.0292087	-0.000557572	0.000557357	-0.00935946	-0.0411825	0.120989	0.146379	-0.00476883	-0.107595	-0.00761102	0.181743	-0.0531842	0.0298306	0.0305427	-0.0586432	0.0450241
EMG1_Q92979	-0.131269	-0.221061	-0.0839367	-0.0987676	0.0052798	-0.166774	0.0354628	0.0293931	0.0339433	0.0280464	-0.0182406	0.0429693	-0.00652307	0.0979452	-0.00529919	0.0522872	-0.214233	-0.142378	-0.175319	-0.0901016	-0.082245	0.0337072	0.00958834	-0.0486129	0.0344481	-0.0385296	0.110398	0.115753	-0.00965249	0.083894	0.0411014	0.0926615	-0.0296101	-0.0419222	-0.00587036	-0.0871786	-0.0526888	-0.0784828	-0.0108836	0.0018514	-0.00185378	0.089525	0.0804628	0.0757632	0.0100673	0.0378304	0.145842	0.108637	-0.0556701
TCF3_P15923	0.0345884	-0.0713017	0.0495389	-0.0113016	0.0112137	0.0423055	-0.0731439	-0.0642306	0.0222298	-0.0211751	0.0281221	0.026814	-0.0727394	-0.0198368	0.0176015	-0.0645508	0.0815116	0.0488557	0.158409	-0.0324819	0.100782	-0.335516	0.325808	-0.116053	-0.176044	-0.218821	0.0437337	-0.131707	-0.0284698	-0.224879	0.0643471	0.0279188	-0.0382195	0.0220065	0.0189145	0.00472754	0.00195933	-0.125026	-0.155042	-0.001962	0.083848	-0.112709	-0.0252641	0.073944	0.116231	-0.0485963	-0.0525359	0.0431405	0.0825525
TCF3_P15923-2																	0.270275	0.00107207	0.0208626	0.132968	0.0631147	0.0093953	0.134145	-0.00107287	-0.191346	-0.00498537	-0.163647	-0.0650168	-0.227858	-0.193829	-0.00792847	0.0302783	0.147066	-0.0192476	0.107172	0.0979637	-0.000852225	0.0257891	0.000851722	-0.0888966	-0.173465	0.039715	0.0263922	-0.0438637	-0.124673	-0.19136	0.0645096	-0.00544998
TCF12_Q99081-3	0.0134557	-0.0666362	-0.0371806	0.155007	0.0801172	-0.101889	-0.164486	-0.0422705	0.113658	-0.0311547	0.0358936	-0.0135823	-0.0367952	0.0221065	0.302983	0.0938579	-0.0522584	-0.00504806	-0.0169986	0.0443666	0.319178	-0.0311358	0.0465636	0.00503046	0.0699612	0.0753904	0.036489	-0.163751	-0.114883	-0.290227	-0.161589	0.364777	0.061962	0.00765945	-0.00963128	-0.105983	-0.00770034	0.0511677	-0.0218141	0.0667616	0.0131018	-0.111712	-0.206512	-0.239989	0.0296724	0.0230411	0.013394	-0.265582	-0.0732984
TCF4_P15884-3																	0.136486	-0.355586	0.0382117	0.00891482	-0.0475793	-0.00897025	-0.162635	-0.0794399	0.0841498	0.0756426	-0.0974728	0.0123352	-0.183795	0.152536	-0.0166802	0.0371664	-0.173522	0.0390738	-0.382642	0.33595	0.0764066	-0.0873449	0.179777	0.233236	-0.421419	-0.0401616	0.240151	0.155787	-0.0504931	-0.433092	0.154883	-0.438374	0.0541702
EIF2B5_Q13144	-0.0215703	-0.0976992	0.00306849	0.0134368	0.0310033	-0.0567561	-0.00307503	0.0884474	0.0136335	0.0178257	-0.015203	-0.00474013	-0.0278694	0.0241899	-0.00957725	0.0251435	-0.0506744	-0.000840935	0.0199798	0.000840445	0.037195	-0.00354727	-0.0162023	-0.00430224	0.021471	-0.0758112	0.110153	0.117664	-0.026589	-0.029	0.0308202	0.0411779	0.0106551	-0.0318719	-0.107458	-0.180485	-0.0764868	0.00807593	-0.0433788	0.0421484	0.00371941	-0.0083769	0.0822246	0.113406	-0.0488204	0.0504843	0.0805329	-0.00372903	0.00349133
PRPF3_O43395	-0.031366	-0.0193167	0.0200316	0.0355377	0.048737	0.0694863	0.0728197	0.0227782	-0.0475044	-0.00393525	0.0563492	-0.0174868	0.00392455	-0.0798134	-0.103847	-0.0761634	0.0968086	0.102795	-0.034004	-0.0103821	0.135396	0.119711	0.060465	0.0830829	0.0103079	0.0257953	-0.161824	-0.177315	-0.0595918	-0.0746434	-0.0454877	-0.0788847	-0.204321	-0.11214	-0.124847	-0.173083	-0.194495	-0.221046	-0.0885758	-0.00840955	0.00836081	0.178218	0.314809	0.0716065	0.0950357	0.134124	0.436155	0.0448033	0.0859296
ASMTL_O95671	0.109219	0.0355593	0.105491	-0.0117543	-0.270224	0.240721	0.500238	0.0116593	-0.0233013	0.388008	-0.158147	-0.176558	-0.107016	0.0637077	-0.169517	-0.410418	0.117157	0.00263315	0.0996154	-0.00263796	0.112487	0.0370187	0.0694012	0.0917907	0.0419522	-0.0619762	-0.0888655	-0.00433602	-0.0906363	-0.0889244	-0.104943	-0.0469947	0.0736794	-0.0670008	0.0882934	0.0156702	-0.0661114	-0.0308722	-0.00793769	0.0237768	-0.0455839	-0.0766208	0.141091	0.0377316	-0.0126049	-0.0198986	0.0183091	0.00789425	0.0915298
CAND1_Q86VP6	0.00521285	-0.0190841	0.0143999	-0.00381102	-0.000516784	-0.0265362	-0.00672341	-0.0610412	0.000516599	0.0105054	-0.00804495	0.0112357	0.0525659	0.0124802	0.0530795	-0.0101224	0.0260659	-0.0309034	0.0379193	0.0169782	0.0225526	-0.00737011	0.0287592	-0.000904494	-0.020148	0.0767911	0.0203232	-0.0698391	-0.0413099	0.000903927	-0.00260426	-0.0552247	0.0217951	0.0068954	0.0199877	0.0133433	0.00696886	-0.00568904	0.0337646	-0.0366165	-0.0312345	-0.0286934	-0.0736852	-0.0633832	-0.00365029	0.0348818	0.000619205	-0.000619471	-0.00506739
CAND2_O75155	0.0558308	-0.0856001	0.0602275	-0.034002	-0.0596438	0.0506708	-0.0476689	-0.147402	-0.00895447	0.0115963	0.0410369	0.0246997	0.0115756	-0.0278188	-0.0216667	0.00889923	0.0423227	0.00809833	-0.00375914	-0.00893935	0.0114851	0.0058829	0.0343606	-0.0205677	0.0156599	-0.0220129	-0.105204	-0.0418898	-0.00273505	0.0197246	-0.0420373	0.00272988	-0.00617511	0.067047	-0.00321109	-0.00594296	0.00320396	0.0112179	0.0439594	-0.0578308	-0.0248359	0.0175532	-0.0127767	-0.042348	-0.0115621	0.14941	0.0909718	0.0617012	0.00921511
F5_P12259	-0.170653	0.0537092	-0.00817083	0.0751968	-0.0988073	-0.00907715	-0.102941	-0.0484631	0.140787	0.0742289	-0.115642	0.00812482	0.0565743	0.072183	-0.0847868	0.0341072	-0.107409	0.0199189	0.169376	-0.0211282	0.0148534	-0.0477717	-0.0951616	0.0560339	-0.0443268	0.163129	-0.129205	0.11211	0.0015108	0.0438885	-0.094155	-0.00151238	-0.0172527	-0.140013	0.0769061	0.0666042	-0.110449	-0.0716283	-0.0132259	-0.0891224	-0.170222	0.038276	0.0131058	0.101523	0.0456263	-0.0168556	0.0954609	0.172167	-0.191192
ATP2C1_P98194-7	0.0294942	-0.0520612	-0.0740952	-0.0185288	0.0236832	0.0344805	-0.071314	-0.119257	-0.00507254	0.00857712	0.00505477	0.0813507	0.0489925	-0.0663382	0.0262981	-0.0360603	0.0566927	0.0514255	0.0708286	0.128675	-0.0595535	-0.0555235	-0.050928	-0.122343	0.0360726	-0.0778025	-0.138273	-0.0534602	-0.0286559	0.0825423	0.0280978	0.165762	-0.00813113	0.0204901	0.00808556	-0.0342389	0.125545	-0.0308214	-0.0514296	-0.069187	-0.0116482	0.0234524	0.0165694	-0.0178977	0.0301316	0.0116028	-0.0152296	0.0893248	0.00310681
ATP2C1_P98194-3	-0.105383	-0.0191223	0.043042	0.153215	0.0261128	0.0415957	-0.0984486	0.0497847	0.115607	-0.211356	0.00313288	0.0919006	-0.0989219	-0.0031397	-0.0830813	-0.0687062																	-0.374606	0.24369	-0.288188	-0.00865559	0.322694	-0.262257	-0.0536663	0.0385924	-0.123538	0.0107167	0.0112216	0.22099	0.0121919	-0.125826	-0.306945	0.00860397
SIN3A_Q96ST3	-0.0947563	-0.0513812	0.181075	0.0582802	0.0789311	0.0152469	-0.0523703	0.16001	0.0916358	-0.060693	0.0772459	0.0182134	-0.0706063	-0.237891	-0.145221	-0.0154098	0.461706	-0.15911	0.277808	-0.125431	-0.0706257	0.399598	0.0174764	0.0760081	0.16214	-0.223394	-0.310139	-0.19389	-0.0176907	-0.251223	0.0404889	0.289412	0.131136	-0.00986521	0.0890795	-0.0669764	-0.0544153	-0.0715334	0.000338422	-0.000338501	0.0034763	0.0707515	-0.0430499	0.0122652	0.169022	-0.0147655	0.0619521	-0.039909	0.0563418
TP53BP1_Q12888-2	-0.065935	0.409834	0.0276141	0.0161795	0.0416117	-0.0778831	-0.0479495	0.0553771	-0.0506961	-0.016363	0.0568246	0.0290286	-0.0437728	-0.0478207	-0.0752424	0.0259919	-0.115584	-0.0335703	-0.00254802	0.00254353	0.0435602	0.018509	0.0618848	-0.0466056	-0.0379829	-0.0634282	0.0414289	0.0094619	0.0397729	-0.146287	0.0194543	-0.0190348	-0.0600533	-0.0385518	-0.0571304	-0.0702092	0.0235882	-0.0556112	0.0169861	0.0914673	-0.00137163	0.0133775	0.00137033	0.0339391	0.0561576	0.00685704	-0.0397636	-0.12272	0.00283726
SCCPDH_Q8NBX0	-0.0305385	-0.117058	-0.00422217	0.0963527	-0.042414	0.0871995	0.199435	0.122855	-0.101395	0.00420985	0.114083	-0.0117683	0.0940715	0.0281377	-0.0117424	-0.0826536	-0.0546939	-0.165441	0.18729	0.083297	0.080593	0.0436891	-0.0475361	-0.0450535	-0.102325	-0.18467	0.240129	0.190981	0.301613	0.324278	-0.0538133	-0.0852513	0.0990153	0.0162211	0.273563	0.272933	0.0577475	0.116769	0.384422	0.313421	-0.0164055	-0.0471099	-0.0691231	-0.116991	-0.07754	-0.0408954	-0.0796914	-0.0347291	0.00744432
QRSL1_Q9H0R6	0.079423	0.0145912	0.0164143	0.0708341	0.0478655	0.063033	0.00717921	-0.0793578	-0.0882037	-0.0428617	-0.0356048	-0.0102734	0.0672548	-0.0218224	-0.00721512	-0.0125656	0.0558309	-0.0950851	0.0436716	0.0757052	-0.0454657	-0.079972	-0.0623495	0.15892	0.0664907	-0.056766	-0.201629	0.0107801	0.120792	0.0438774	-0.0108612	-0.0468922	0.00206851	0.068597	-0.012554	0.0862392	0.108331	0.174826	-0.0534042	-0.00207148	-0.0891209	-0.091166	-0.0505302	0.0038776	0.0710142	0.0110776	-0.0971189	-0.108945	-0.0177562
BOD1L1_Q8NFC6	-0.0318726	-0.0498711	0.0017587	-0.00176085	0.0457459	-0.0263039	0.0390546	0.0799567	0.0549073	0.0669073	-0.0350316	-0.057757	-0.0199252	-0.00324302	0.0125233	0.034434	-0.047213	-0.0321188	-0.0464213	-0.00948761	0.0287979	-0.00691673	0.00391251	-0.0221008	0.00890333	-0.00392314	0.0474811	0.0435167	0.11116	-0.0194534	0.0392439	0.0701664	-0.0632975	-0.035149	-0.0707319	-0.0323781	0.00335241	-0.0760602	-0.00336022	-0.0277938	-0.0348738	0.0517821	0.0212461	0.0355357	0.0331028	0.0201299	0.0552249	0.0237446	-0.0272427
BOD1_Q96IK1																	-0.131304	-0.157313	-0.0852315	0.0350745	-0.00822767	-0.173144	-0.279307	0.0811105	0.193189	0.328566	0.163405	0.00818101	-0.013288	-0.124133	0.0504606	0.181189
TRPM7_Q96QT4	-0.0526217	-0.0227761	-0.0882256	-0.15938	0.111776	0.030421	0.0267328	-0.262084	0.0585845	-0.0644325	0.0653899	0.036715	0.157015	0.0224221	-0.196891	-0.104051	-0.132328	-0.217543	0.1048	-0.0380976	0.109407	0.0368229	0.132351	-0.124995	-0.0411014	0.0158098	-0.0159849	-0.0706904	0.235869	-0.0417684	0.0448856	0.0519472	-0.121105	0.104083	-0.0883813	0.155762	-0.0561054	0.0675276	-0.158071	0.00790246	-0.13988	-0.00794598	0.407875	-0.0808651	0.193013	0.108882	-0.0666012	0.0718463	-0.0850611
SRPK2_P78362-2	-0.148103	-0.24414	0.00700661	-0.107729	-0.00704081	-0.142747	0.116949	0.355811	0.101569	0.092582	0.0303433	-0.0155831	-0.100445	0.0938049	-0.0207955	0.121664	-0.71841	-0.127698	-0.0456897	-0.115804	-0.0230804	0.0729903	0.022717	-0.117484	-0.0601468	-0.0831918	0.26459	0.261456	0.312769	0.183836	0.149376	0.284619	-0.254016	-0.219305	-0.159466	-0.356719	-0.180421	-0.199759	-0.0648271	0.065625	0.0575693	0.313597	0.45249	0.408172	-0.000112053	0.000112044	0.41397	0.266356	-0.163871
SRPK1_Q96SB4	-0.309106	-0.369029	-0.0476248	-0.141368	-0.00120799	-0.257258	0.116604	0.362563	0.14001	0.063334	0.0103528	0.00120698	-0.151389	0.14129	-0.0495626	0.139196	-0.848881	-0.0981307	-0.209622	-0.155265	-0.0593907	0.00742051	0.00474377	-0.00475942	-0.0674003	-0.0569135	0.247113	0.276292	0.450536	0.244444	0.150898	0.319456	-0.357851	-0.224092	-0.24664	-0.355689	-0.330159	-0.256035	-0.0926142	0.133953	0.0344481	0.295538	0.569598	0.491675	0.0513417	-0.0352909	0.560246	0.345667	-0.326597
AP2A1_O95782	-0.0473026	-0.150985	-0.0222799	-0.0335168	0.0112012	-0.0339453	0.0651397	0.0386597	0.0144881	-0.014917	0.00985248	-0.00306231	0.00602661	0.0132853	0.00305582	-0.00474104	-0.050544	-0.0483475	-0.044257	-0.0391554	0.0212831	0.0550525	0.0202934	0.027344	-0.0722017	0.0188133	0.00179315	-0.00179539	0.0258643	-0.00497741	-0.0201445	0.0161854	0.0545295	0.00331256	0.0202788	-0.0349982	-0.0366019	-0.0055731	0.0282492	0.0377765	-0.00342335	0.0233224	-0.253543	-0.219935	-0.00332018	-0.00575449	0.0326094	0.0217236	-0.00982466
AP2A2_O94973-2	-0.0901817	-0.0946273	0.00209026	0.00196624	0.0170482	0.00631896	0.0441777	-0.00424845	0.00340101	-0.00196892	-0.00783983	0.0161001	0.00420616	-0.0338521	-0.0356309	-0.00566084	-0.116158	-0.102451	-0.0532394	0.0497722	-0.0462595	0.115025	0.0417667	0.0209999	-0.0078352	0.0931325	0.00779288	0.170112	-0.0456849	-0.0692136	0.00822287	-0.0312927	0.0781409	-0.0270307	-0.0265504	0.0394434	0.000601303	-0.0410987	0.0170391	-0.0114216	-0.000601554	-0.0293807	-0.21257	-0.160122	0.0121942	0.0436244	0.0691543	0.0340534	0.000546127
RCN1_Q15293	0.0131846	-0.0707173	-0.00366949	0.0412205	0.0440562	-0.00138966	-0.00628604	-0.144268	-0.0137131	-0.0096237	0.0464917	0.0449898	0.00733173	-0.00366256	0.0381817	0.00138833	-0.03163	0.0667307	-0.0412663	-0.0263772	0.0804835	0.0431198	-0.0631963	-0.0974612	-0.0313357	0.0557937	-0.013069	0.0524724	0.0129517	-0.0322564	0.0642477	0.105803	0.02859	-0.0299346	0.0213817	-0.0167149	0.0596523	-0.0121895	-0.0437608	-0.0574092	-0.037019	0.00672771	0.0178823	0.00990884	-0.00675923	0.0216041	-0.0218133	0.0720751	-0.0256642
BCAT2_O15382	-0.00654895	-0.0645955	-0.0193038	0.0324483	-0.00127275	0.00127163	-0.00912111	-0.0586077	-0.0333604	0.0342961	0.0381216	0.0418339	0.0363328	-0.0100973	0.0152249	0.0155767	0.053154	-0.0206007	-0.0013259	0.0288182	0.00132468	-0.0761082	-0.0793466	-0.0573458	-0.0170988	-0.0363999	0.0395286	0.014905	-0.0497069	0.00164759	0.0154031	0.00237157	-0.042541	0.0100776	-0.0395787	0.0293386	0.0974114	-0.000508041	-0.000815262	-0.0794442	-0.0548422	-0.0233224	0.0125448	-0.0112813	0.0281391	0.0568567	0.00512811	0.000507862	-0.00618601
PLXNA1_Q9UIW2	0.0061481	-0.0139173	-0.0655889	0.0217074	0.0679182	0.00570252	0.056773	0.0330672	-0.0368375	-0.0213999	-0.00206444	-0.0183485	0.0298065	-0.0205598	0.00206149	-0.0599305	0.0661658	0.0189468	0.0235487	0.0329252	0.0018473	-0.055322	0.0037831	-0.0283781	0.0507293	-0.0518514	-0.00184967	0.0623851	-0.101239	-0.0769141	-0.0234073	-0.0342231	0.0635276	0.043798	0.0370974	0.0947421	0.0891138	0.0498574	-0.0156193	-0.00578188	-0.0315864	0.00280401	-0.0383702	-0.0297394	0.0848819	-0.00280947	-0.0663819	-0.0231905	0.0209348
PLXNA3_P51805	-0.20968	-0.260037	-0.178186	-0.361648	0.323449	0.080387	0.0172935	0.0718533	0.245512	-0.235448	-0.209931	0.14636	0.306255	-0.0175033	-0.0177884	0.378895	0.0245503	-0.309138	0.295242	0.0901342	0.00756337	0.135858	-0.175985	0.0295096	-0.00121937	0.00121834	-0.325375	-0.157535	-0.067754	0.161164	-0.163515	-0.0452387																	0.128695
SEL1L_Q9UBV2	-0.12865	-0.0774495	-0.00194938	-0.0212595	0.0173472	0.0687033	0.0704454	0.00194675	0.0452033	0.0273531	0.13225	0.0602087	-0.0871122	-0.134218	-0.0279147	-0.0430222	-0.0314435	0.0420238	0.0409575	0.0122437	-0.00903195	-0.0232132	-0.0253468	0.0276506	-0.0993608	-0.0803362	0.0394554	0.0081278	0.0903537	0.0450927	-0.00817385	-0.0379684	0.00278569	-0.00090746	-0.0237147	-0.0338913	0.033654	-0.050391	0.00904907	0.0194697	-0.00883478	0.0205179	0.00090689	0.0605613	0.00947284	-0.0219651	-0.0356767	-0.0468192	-0.0238131
ALDH4A1_P30038	0.0436611	-0.0534566	-0.0255455	0.0463891	0.0263109	0.00120568	-0.0356402	-0.0738141	-0.00486993	-0.0388507	0.0212058	0.0244151	0.0444545	-0.00120669	-0.00768271	0.0194674	0.0865816	0.0458699	0.00136729	0.0750611	-0.00272689	0.00526801	-0.0991654	-0.0235383	-0.0480666	-0.039563	0.0238674	-0.0328457	0.0219957	0.0495406	-0.00136858	-0.00866569	0.028509	0.0604739	0.0360199	0.110792	0.0144627	0.0792064	0.0675252	0.0598645	-0.0146092	-0.102646	-0.110894	-0.141123	-0.062372	-0.0686832	-0.109612	-0.0721236	-0.0292947
PPP1R12C_Q9BZL4	-0.0178981	0.0934095	0.0941626	0.128927	-0.0996567	0.0374104	-0.0780905	-0.09151	-0.0970509	0.0339441	0.068291	0.0602964	0.00556763	-0.0530934	-0.313865	-0.0055892	-0.247155	-0.0773833	-0.10098	-0.354494	0.394065	0.579674	0.641376	0.582709	-0.0976348	0.65228	0.126953	-0.068325	-0.0575008	0.0552966	0.139013	-0.370052																	0.105488
YBX1_P67809	-0.230971	-0.205639	-0.11024	-0.144353	-1.50895e-05	-0.148675	0.0383639	0.252836	0.122075	0.0440537	1.50894e-05	-0.0177577	-0.00512441	0.211508	0.0281418	0.182604	-0.294514	-0.0397973	-0.0369222	0.103205	-0.0836826	-0.0277867	-0.00290474	-0.0447025	-0.00681327	0.0028989	0.37161	0.323898	0.348733	0.31871	0.174145	0.323033	-0.259683	-0.128309	-0.133327	-0.265386	-0.222471	-0.234324	-0.0760165	-0.0203641	0.0500822	0.304576	0.256932	0.30224	0.0829968	0.0200806	0.35614	0.234545	-0.267642
YBX3_P16989	-0.282714	-0.291659	-0.152988	-0.178481	-0.0404825	-0.266916	0.013719	0.169032	0.0695027	0.068404	-0.0232322	-0.0030785	0.00307195	0.195224	0.0970666	0.178986	-0.319144	-0.0544458	-0.0198525	0.0308624	-0.0079066	-0.0282326	-0.040136	-0.0557639	-0.0267217	0.00786351	0.289698	0.313222	0.403805	0.275937	0.119369	0.268092	-0.223146	-0.177649	-0.232132	-0.24033	-0.178845	-0.203923	-0.109728	-0.0157793	0.0156085	0.180638	0.184287	0.216452	0.0214763	0.0218951	0.262002	0.221073	-0.194884
YBX3_P16989-2	-0.137305	-0.229486	0.00596346	-0.0664989	-0.0838937	-0.223674	-0.00598821	0.0722315	0.147688	0.0908752	0.103888	-0.0892274	-0.0558806	0.256789	0.00992774	0.139102																	-0.266736	-0.120614	-0.0402759	-0.157783	-0.148324	-0.44609	-0.13308	-0.0194134	0.0191557	0.24961	0.188126	0.214276	0.125216	0.0727519	0.437711	0.246651	-0.0456811
YBX1_C9J5V9
SLC30A10_Q6XR72	-0.0965684	0.167473	0.0707356	-0.120296	0.017204	0.059982	0.0358788	-0.073905	-0.0289165	-0.222628	0.0336154	-0.0174117	-0.0759467	-0.084457	0.0771522	0.0557923	0.116235	0.0119697	0.0403442	0.150441	-0.454369	0.025318	-0.571731	0.276342	-0.516194	-0.170729	-0.0691333	0.157177	0.0594514	-0.215763	-0.475567	-0.0120699	0.161376	-0.00691547	0.156521	9.85362e-05	-9.85429e-05	-0.0107389	-0.0477789	0.00770143	-0.000696901	0.0258271	-0.0763916	0.0750671	0.111239	0.00601459	-0.043199	-0.0194712	0.0456565
TTC38_Q5R3I4	0.0301091	-0.118467	0.0257943	0.0210383	0.0635263	-0.094177	0.0387746	-0.0626766	-0.0235692	-0.0213496	-0.0908056	0.0864756	-0.0498308	-0.0459423	0.0452513	0.047074	0.0670985	-0.00180787	0.0504081	-0.132279	0.472254	0.445934	0.0885862	-0.0458018	-0.0174959	0.0749355	-0.0803974	0.0018056	-0.0778139	0.0150356	-0.0344347	-0.065333	0.112521	-0.00708428	0.128993	0.0137386	0.0362067	0.0623774	0.00705917	0.0601823	-0.0624833	-0.0678078	-0.0368987	-0.110007	-0.0395792	0.00704967	-0.109737	-0.153441	0.0884435
C5orf24_Q7Z6I8																	-0.269466	-0.0125327	-0.174779	0.0459686	0.0192108	-0.0427156	-0.0784835	0.0124248	-0.0787619	0.0630749	-0.139527	0.0692107	-0.122752	0.0947728	0.130932	0.149269																	-0.0791736
CCDC137_Q6PK04	-0.631758	-0.377328	0.025386	-0.462411	-0.0942676	-0.556177	0.026095	0.506616	0.385814	0.218485	-0.0594221	-0.0258407	-0.108199	0.492951	0.068214	0.342931	-0.845376	-0.295858	0.0631956	0.274416	-0.0794755	-0.0898246	0.00619896	-0.22565	-0.432787	-0.259151	0.316354	0.41377	0.362125	0.0887685	-0.00622571	0.238747	-0.393014	-0.344282	-0.26148	-0.498695	-0.514862	-0.43388	0.00858449	0.290628	-0.00863588	0.215804	0.586098	0.502411	0.0611675	-0.0427238	0.695483	0.462951	-0.244209
TOM1_O60784-2	-0.0247645	0.0468805	0.0286866	-0.0480878	-0.00822084	0.0106178	-0.101708	-0.142617	0.119253	-0.00186773	-0.0330384	0.00186531	0.0607811	-0.0342924	0.0126798	0.0748536	0.238951	0.0846199	-0.132213	-0.175953	0.00335422	-0.240504	0.00547725	0.0474309	0.190529	0.335866	-0.189354	-0.35964	0.205863	-0.00336203	-0.0509853	-0.113148	0.0124294	0.0549773	-0.00204909	-0.0279119	-0.107397	0.109636	-0.00398425	0.00204618	0.087958	0.0514016	-0.175953	-0.0151883	0.0323269	-0.0166673	-0.0420712	0.0435365	-0.0387151
TOM1_O60784	0.153123	0.0951833	-0.00404801	-0.073928	0.0854832	-0.0483545	-0.255293	-0.319837	-0.160714	0.0381153	0.161524	0.211249	0.181244	0.00403668	-0.0972579	-0.0559947	0.181774	0.128976	0.0696923	0.272164	0.13871	-0.0427822	0.00186582	-0.211361	0.0785828	-0.00186823	-0.601266	-0.72745	0.00891036	-0.045182	-0.0255234	-0.119067
KAZN_Q674X7-3	0.0451916	-0.130445	0.0199642	-0.0590961	-0.0490889	-0.0650031	0.00124088	0.0195807	0.0339125	0.0545808	-0.0201487	-0.00342686	0.0132858	-0.0231245	-0.00124194	0.0414357	0.0763514	0.00645605	-0.00417321	-0.0368601	-0.147381	0.0102446	-0.101395	-0.00203325	0.00166039	0.0483582	0.00505801	0.0295197	-0.0787101	-0.0365297	-0.00166231	0.00767651	-0.00911553	0.0281235	-0.035619	0.0250286	0.00927551	0.0220563	-0.130746	-0.176	-0.0350625	-0.0158442	-0.176796	0.0240989	0.0090583	0.106355	-0.0868104	0.0640293	-0.072701
TPR_P12270	0.0196287	-0.0834361	0.0151292	-0.015806	0.00287605	-0.0423337	0.000158635	-0.0228165	-0.00842098	-0.000158652	0.156835	0.191724	-0.0310646	-0.0659012	0.00833268	0.0985892	0.0125921	-0.130992	0.0921624	-0.0201076	-0.0811144	-0.0872578	-0.0172337	0.0095198	-0.0660111	-0.065115	0.302728	0.290645	0.025309	-0.00958304	0.0761716	0.0579703	0.0719119	-0.00149856	-0.167356	-0.201043	0.0173207	0.0113774	0.037217	0.0615494	-0.00112261	-0.0116654	-0.0852714	-0.0815784	0.0118749	0.0748033	-0.0241278	0.00112173	0.0283947
PCM1_Q15154-5	-0.10119	-0.212906	0.0682071	-0.0903394	0.0194289	-0.215357	-0.142946	0.125964	0.0194996	0.0840835	0.0759928	-0.0196941	-0.113911	-0.0630628	0.020514	0.134814	-0.190055	-0.102486	-0.0477351	0.0499285	0.0936256	-0.0248666	0.000284276	0.00798	-0.0659597	-0.0233177	-0.000284332	-0.0508324	0.127164	0.0327932	0.070453	0.0831466	-0.097031	-0.0300105	-0.126028	-0.253686	-0.101751	-0.135127	-0.0636617	0.145651	0.101275	0.219836	0.246526	0.246391	0.0882684	-0.00568919	0.190614	0.00566684	-0.152588
PCM1_Q15154-2																	-0.086279	0.0510122	0.131329	-0.117972	0.0177997	0.087921	0.215706	0.202106	0.00191694	-0.0959401	-0.00191949	0.350141	-0.430964	-0.118957	-0.0398723	-0.115188																	-0.238567
SLC20A2_Q08357	-0.0856079	-0.0841666	-0.0943599	0.0439543	0.011052	-0.0420459	0.0602824	-0.130559	-0.0466169	-0.00125894	0.00125784	0.0316554	0.0842445	-0.0782352	0.0309159	0.030486	0.0807763	0.0039846	0.150725	0.120227	0.0303683	-0.1956	-0.115591	-0.106518	0.0442166	-0.0534791	-0.135732	-0.00399564	0.0138198	0.0125717	-0.0763943	-0.0190145	0.00832362	0.0567105	-0.0160424	0.0303423	0.0221315	-0.0211318	0.00422773	-0.0388337	-0.0217558	-0.0641347	-0.0782755	-0.00424015	0.0700275	0.0463521	0.00620119	-0.0447241	0.018912
SLC20A1_Q8WUM9	0.0145603	-0.140262	0.021518	-0.0193991	-0.00710306	-0.029377	0.0203804	-0.0549229	-0.0366893	0.00706826	0.0370354	0.0132823	0.0176991	-0.0450722	0.0241514	-0.0198414	0.0772478	-0.0720654	0.0862366	0.0856016	-0.052722	-0.0750582	-0.0578405	-0.0729296	0.0314731	-0.0137122	0.0172852	0.0788748	-0.0890397	0.0135831	0.0159936	-0.0217887	-0.0508545	-0.00965244	-0.0168302	0.00859733	0.0197794	0.000914987	-0.000675363	-0.0951875	0.000675047	-0.0300651	0.0415236	-0.0668274	0.0190233	0.0097786	0.0143615	-0.00204784	-0.0187886
CALML3_P27482																																																	0.173652
CALM2_P0DP24	-0.160779	-0.139486	-0.031234	0.00417215	0.0104376	-0.143571	-0.00418425	-0.0457652	-0.0988187	0.0483594	-0.0287196	0.0801758	0.0555438	0.0207934	0.11323	0.0372501	-0.100423	0.117977	-0.060395	0.011791	-0.049785	-0.00172696	0.0676506	0.0159407	-0.110983	0.181339	0.0127262	0.0586257	-0.00576111	0.00172489	-0.05253	-0.0355395	-0.0360489	0.0102682	0.0296281	0.00687576	-0.0319434	-0.000472775	0.0161334	-0.0699663	-0.126691	-0.0587694	-0.10445	-0.068273	0.000472621	0.0347469	0.0150042	0.000813733	0.0292938
CALM1_G3V361																																																	0.0130693
TNNC2_P02585	-0.04784	-0.0735316	-0.0217382	0.0146848	0.0149413	-0.00232457	-0.0205151	-0.0931173	0.115143	-0.0229153	0.00232083	0.0503516	0.0458137	-0.0216935	0.0813035	0.00562228	0.0532987	0.022483	0.116269	-0.0671493	-0.0975772	-0.104114	-0.00529013	-0.111706	-0.0185676	0.0248134	-0.0103749	-0.0198218	0.106796	0.0496935	0.0742462	0.0052708	-0.018564	-0.0423883	0.0709166	0.026619	0.0230807	-0.0153665	0.0229942	-0.0350974	-0.0606865	-0.0303667	-0.0343344	0.0236839	0.0468599	0.0152045	0.0182825	-0.0366889	0.0506331
ATP11A_P98196	-0.0533451	-0.0424301	0.00808274	-0.0738923	0.0109075	0.0795792	-0.0504408	-0.00565046	0.0342792	-0.03726	-0.0133818	0.0827639	0.00562842	0.00882628	-0.0425255	0.043828	-0.0328105	-0.0115402	-0.0181116	0.032536	-0.0606692	-0.0996939	0.0225518	-0.0259951	-0.0536467	0.0193363	0.0823342	0.0847183	0.0422177	0.0114486	0.0322484	-0.0765305	0.00646428	-0.00649337	-0.0673329	0.0557142	0.0225746	-0.0280264	0.0556808	-0.034657	-0.0722396	-0.0175935	-0.130258	-0.0759422	0.0537033	0.0696616	0.0675596	0.0507689	-0.174891
ATP11C_Q8NB49	-0.0204606	-0.0927764	-0.0250345	0.00711238	0.0112467	-0.0524948	0.0500986	0.0285562	-0.00714762	-0.0227809	-0.0246892	0.0420926	0.0887266	0.0522157	0.0095274	-0.0344224	0.0552399	-0.0176706	0.14216	0.0415689	-0.0275187	-0.0337356	0.0174568	0.0806543	0.0581259	0.0180657	-0.0543865	-0.0961697	-0.0566132	0.0436403	-0.0605905	-0.0814001	0.0517702	0.0275123	0.0393339	0.044573	0.0963771	0.0498689	-0.0179429	-0.0751463	-0.0562423	-0.0368269	-0.0538076	-0.0774662	0.0547187	-0.00307182	-0.0308821	0.0030653	-0.0554898
ATP11B_Q9Y2G3	0.0226713	-0.102267	-0.0312566	-0.00580716	-0.0209971	-0.0024522	0.00244804	-0.116651	0.178964	0.0375097	-0.0298242	0.024794	0.0594762	0.00986714	0.0267389	-0.0172653	0.053884	0.0599982	0.0656099	0.0629074	-0.0254262	-0.030033	-0.0479777	-0.0967212	0.110548	-0.0153948	-0.0859676	-0.0916359	0.0616661	0.0527663	-0.0254827	0.0152322	-0.0567617	0.0305598	-0.00430249	0.0113968	0.0328019	-0.0154333	0.00361462	-0.0848364	-0.0290862	0.016095	-0.0211565	-0.0162789	0.0630854	0.0507435	-0.00362369	0.0545371	-0.0731944
CPS1_P31327-3	-0.00175483	0.00932242	0.0192879	0.0834391	0.00175269	0.135278	0.0901479	-0.113077	-0.0671592	-0.00797581	-0.135734	-0.139161	0.108671	0.082136	-0.0962484	-0.190313	-0.286629	0.282804	0.30632	-0.0409712	0.0799128	0.402083	-0.151029	-0.00317474	0.0294894	0.00316777	-0.0835605	-0.00321452	-0.174127	0.0666554	-0.0041674	0.0269911	0.14855	0.0465775	0.334845	-0.0182787	0.131414	0.138695	0.143077	-0.0982869	-0.103669	-0.142088	0.165975	0.0145357	-0.259958	-0.196969	-0.0258453	-0.0146837	0.144396
CAD_P27708	0.0154593	-0.14269	0.0436604	-0.0393989	0.0938899	-0.0292087	0.0280034	-0.00610709	0.0336173	-0.00540895	0.0226975	-0.0450112	0.0104989	0.00538875	-0.116259	-0.114573	-0.0221826	0.0215641	-0.0138172	-0.0663625	0.0744833	0.10073	0.0645874	0.0549435	0.0886821	0.0933361	-0.445393	-0.470126	0.0136861	-0.0397091	-0.0788105	-0.0820353	0.0444739	-0.0293222	0.0080579	-0.0311924	0.0307547	0.0652456	-0.0202008	-0.00810316	-0.0109932	-0.0487462	0.055955	0.00946986	-0.0227817	-0.044049	0.0836103	0.0682234	-0.00153153
CAD_H7BZB3
SEC24D_O94855-2	0.0419682	-0.029484	0.0508751	0.0133987	-0.00313451	0.0664446	0.0542272	-0.055937	-0.0457653	0.00312771	0.0288505	0.0570787	-0.0119978	-0.0133144	-0.00919386	-0.0436352	-0.0011115	-0.0331678	0.018752	-0.0673653	0.0510724	0.00266319	0.0217722	0.0935304	-0.0370944	0.00111065	0.190984	0.0667743	-0.0692641	-0.0763192	-0.0669224	-0.182665	0.0977502	0.00253868	0.0146671	0.0929652	0.0714181	0.148683	0.0395486	-0.00578408	-0.0375685	-0.0839647	0.0187224	-0.0366228	-0.00254316	-0.0137843	-0.034298	-0.0347357	0.0967752
SEC24C_P53992	-0.0513027	-0.116602	0.0163184	-0.00480652	0.0480767	0.091394	0.0763401	0.0794373	-0.0477976	0.00479056	0.0436375	0.0226481	-0.0346843	-0.0631135	-0.0621539	-0.0768444	0.0156597	0.00623601	-0.0153251	-0.0724183	0.0516685	0.0341327	0.0207639	0.0296683	0.00509311	-0.00511116	-0.00562327	-0.0312771	-0.164178	-0.178152	0.0146271	-0.142808	0.0984561	0.0526471	0.0175984	0.00715635	0.00391592	0.0831012	-0.00392658	0.0371182	-0.0396353	-0.0272731	0.031568	-0.00788128	-0.0124056	-0.0328764	-0.106468	-0.0445009	0.102844
RNF213_Q63HN8-4	0.219298	0.088141	0.131259	-0.00614988	0.0132553	0.0485363	-0.139271	-0.451133	-0.0134178	-0.119936	-0.251651	-0.239289	0.0503264	0.0322676	0.00612378	-0.070307	-0.141398	0.000891405	-0.175184	-0.016349	-0.0823901	0.15172	0.0593648	0.0947572	0.216397	-0.202384	-0.00374808	0.0427504	0.0862657	-0.0927941	-0.000891956	0.172247	0.0442793	-0.157843	-0.0262037	-0.0294683	0.176938	0.0434244	-0.0628909	-0.103028	-0.196818	0.0437982	0.157721	0.0738734	-0.0597879	-0.119172	0.0257362	0.0405516	0.0559589
USP22_Q9UPT9	0.23986	-0.0122851	0.28437	0.0498031	-0.0710552	0.312893	-0.0472123	-0.0227695	0.189845	0.0216569	0.287943	0.0121814	-0.0394211	-0.18224	-0.14932	-0.060722																	0.156285	-0.11916	0.197108	0.144024	0.116144	0.249831	-0.0216394	0.0685623	-0.013945	0.0138115	-0.0278788	0.112224	-0.0524714	-0.0580316	-0.0670798	-0.0428466	0.203883
USP27X_A6NNY8																																	-0.0448463	-0.0399291	-0.194963	-0.510767	0.0511497	0.216605	0.0407973	0.0574714	0.0388537	-0.67101	0.172614	-0.270351	0.407021	-0.201726	0.277379	-0.287184	-0.137952
MDN1_Q9NU22	0.0535083	-0.0404596	0.0633413	0.0313497	0.0962064	0.064332	-0.0554553	-0.131971	0.0250383	-0.0302036	0.0420755	0.0321745	-0.0254806	-0.0669583	-0.0599481	-0.0998042	0.143617	0.117445	0.0413632	-0.0399766	0.132852	0.0638433	-0.010457	0.0103817	0.124271	0.0536585	-0.275405	-0.298757	-0.0967751	-0.215633	-0.0828157	-0.0689733	0.062002	0.0292868	0.000863518	0.0396869	0.0311648	0.0507759	-0.0186604	0.0143196	-0.0366814	-0.0589274	-0.000864035	0.00408855	-0.0316795	-0.0659039	-0.193221	-0.0924314	0.0927461
GIGYF2_Q6Y7W6	0.0567346	-0.0294187	0.110752	0.0758346	0.0935379	0.0436193	-0.0838752	-0.0684264	-0.0319508	-0.0067769	0.00674522	0.0203162	-0.0296767	-0.047755	-0.021786	0.00880855	0.135	0.0764001	0.0292935	-0.0828566	0.132716	0.0733006	0.00895581	0.080371	-0.00901176	-0.0559195	-0.217858	-0.225034	0.025615	-0.0864987	-0.0513464	-0.0262043	0.0745687	0.0234128	0.0468243	0.0620357	0.055527	0.058667	-0.0269344	0.0583538	-0.0234558	-0.0235141	0.00753731	-0.0075769	-0.0364569	-0.0555614	-0.141812	-0.0935679	0.120389
ASB6_Q9NWX5	0.0264036	0.0422927	-0.0230301	0.0843423	0.165255	-0.0313114	-0.126219	0.0484521	0.00153463	-0.0428764	0.049876	-0.218504	-0.21462	-0.00153626	0.00302622	-0.132311	0.00306763	-0.00331447	0.151109	0.162808	0.00542609	-0.154729	-0.00475711	0.0327325	-0.083102	-0.00307417	-0.0625155	-0.103407	0.0679073	0.149871	0.0413521	-0.193689
NRSN2_Q9GZP1																																																	-0.0428229
WBP2_Q969T9	-0.0772839	-0.0185352	0.00255688	-0.00256142	0.0293351	-0.0365736	-0.0312769	-0.0396629	-0.0300287	0.0527519	-0.067355	0.0075814	0.0931789	0.0688875	0.106665	0.0760506	-0.0450143	-0.0492903	0.00143103	0.00936231	-0.0064723	-0.0636083	-0.000255937	0.0149087	-0.177727	0.000255892	0.171539	0.0089866	0.0540605	0.0665799	-0.0853333	-0.0580075	0.0509348	0.0226007	0.0398536	0.0427169	0.00931192	0.040858	0.00393479	-0.0283113	-0.0061759	-0.0377139	-0.077352	-0.0961534	-0.00394555	0.0449825	-0.0240407	-0.0684111	-0.0124737
CYHR1_E9PJD7	0.0151757	-0.0410002	-0.0363836	0.0548392	0.0191742	-0.0439925	-0.0372294	-0.0278184	0.0149746	-0.0242322	0.0320299	0.0810254	0.102817	0.0424888	-0.0183958	-0.0151316	0.0539785	0.0404736	-0.0203855	0.0143253	0.0374207	-0.0385169	-0.037822	0.0680457	0.0573783	0.00262704	-0.0370612	0.0416431	-0.04759	-0.0797089	-0.0858311	-0.00263183	0.0978312	-0.00924818	-0.0315811	0.0362027	0.118804	0.0904575	0.0279016	-0.181724	-0.17502	-0.15254	0.124027	-0.154986	0.039175	0.00918928	-0.068135	-0.0876387	0.00263511
PRKRA_O75569	-0.0669519	-0.17343	0.0227864	-0.156556	0.0860459	0.0632028	-0.0609079	-0.0501021	0.00665629	-0.16272	0.15067	-0.0843761	0.0206417	0.119569	0.140945	-0.00668714	-0.659737	-0.142079	-0.373277	-0.142708	-0.0108738	0.0489853	-0.116058	0.110438	-0.24739	-0.0197223	0.049931	0.163207	0.0107925	0.056774	0.150087	0.277838	-0.401512	-0.0750014	-0.181633	-0.299566	-0.312883	-0.179832	-0.0440328	0.191167	-0.0220169	0.0473036	0.577657	0.532818	0.0727162	0.021686	0.362734	0.126393	-0.224591
CCAR2_Q8N163-2	0.0290643	0.125306	0.0421053	0.00951734	0.0904639	0.00428892	-0.0141681	0.0288427	-0.00430171	-0.0146618	-0.023587	0.0229872	-0.0675776	-0.0534478	-0.0694555	-0.0448125	0.0145516	0.0129136	0.0012717	-0.0700416	0.198929	0.136727	-0.0188618	0.0398463	0.0127755	-0.00127282	-0.187012	-0.10317	-0.00697658	-0.179455	-0.0801982	0.0304169	0.0117405	0.0359728	0.00642009	-0.0239527	-0.00644878	-0.0212126	0.00712258	0.119453	-0.0342613	0.0756921	0.0541333	-0.0311421	0.0666955	-0.0442012	-0.25049	-0.256726	0.0993139
MTA2_O94776	0.0512691	-0.0191054	0.0796781	0.047803	0.0539375	-0.0109432	0.00243999	0.0953273	-0.0476259	-0.0137882	-0.00923614	0.0269043	-0.00244413	-0.0462287	-0.0555752	0.00320273	0.0478075	0.0718886	-0.0177942	0.000806846	-0.0744714	-0.0953913	0.00851219	0.0681956	-0.000807297	-0.038459	-0.0695953	-0.0380571	0.0268929	0.0329222	-0.0032702	0.0848974	0.0418403	0.0107413	0.0333952	-0.0253023	-0.0178388	0.0792793	-0.0108219	0.125673	-0.0368449	0.0262973	0.0645241	-0.0204179	0.0180532	-0.0216703	-0.149339	-0.113875	0.1009
MTA1_Q13330	-0.07582	-0.103607	0.0744267	0.0260639	0.0404976	-0.0614089	-0.114322	0.0133804	-0.0569681	-0.0169037	0.0199415	0.042005	-0.0729171	0.0276136	-0.00446939	0.00445559	-0.0025338	-0.0505399	0.0538242	-0.023897	-0.040197	0.0949805	0.102621	0.112994	-0.0187841	0.0575774	0.0918526	0.00252936	0.0823847	-0.00613483	-0.0124073	-0.0617476	0.083469	0.0511833	0.0185722	-0.0528585	-0.00492194	0.0191605	0.00133881	0.165112	-0.0256693	0.0261769	-0.0909402	-0.117179	-0.00134006	0.00337455	-0.207403	-0.190302	0.0627361
MTA3_Q9BTC8																	-0.146633	-0.0343214	-0.140492	0.0935599	0.290751	0.181796	-0.0425717	0.213579	0.130068	0.0335239	-0.186001	0.0919524	0.139538	-0.248255	-0.185493	-0.0463486																	-0.36212
NF2_P35240	0.00898995	0.0541647	-0.0399196	-0.0329866	0.000533772	0.0275066	-0.039606	-0.0798	0.0463953	-0.00182232	0.0308835	0.0585499	0.0674062	-0.0670404	-0.000533969	-0.0187396	-0.0220095	0.00268073	-0.050862	-0.0370286	0.0477732	0.0395015	0.038622	0.0781954	0.10163	0.0624106	-0.00268572	-0.0141929	-0.0759946	-0.0376144	0.0224936	-0.117506	0.146879	-0.0406552	0.00374033	0.0334047	0.0411455	-0.000426466	0.035226	0.00042634	0.108464	-0.0381969	-0.0612596	-0.0444994	0.0351064	-0.0601219	-0.13357	-0.0212459	0.0952433
TSPAN31_Q12999																																	-0.119258	0.0120074	-0.151348	0.100405	0.074828	-0.274594	0.0190768	-0.197589	-0.245242	-0.108642	0.159287	0.0614892	0.0925383	-0.0121082	-0.0266049	0.122989	-0.221666
TSPAN13_O95857	0.106109	0.0266105	-0.0448709	-0.0371401	0.0217658	-0.0220992	-0.100993	-0.101905	-0.0731988	0.171412	0.0953684	0.0542025	0.22549	0.124853	-0.207151	-0.182628	0.232317	0.131308	-0.0278117	0.133403	0.00716936	-0.00405458	0.0296089	-0.00157002	0.131682	0.00994896	0.00156831	-0.0071557	-0.0625797	-0.037644	-0.139958	-0.0558496	0.369001	0.261604	-0.113795	0.0385888	0.0352854	0.00995361	0.053953	-0.0100228	0.149104	-0.0269684	-0.192114	-0.148472	-0.0257177	0.0621883	-0.357596	-0.252401	0.25936
MELK_Q14680	-0.100586	-0.0618452	0.0540244	0.0409938	-0.00655355	-0.000304131	-0.0408166	-0.0799742	-0.0033992	0.117939	0.0501795	-0.0331162	0.0384831	0.024545	0.000304067	0.0868953	0.0165774	0.0581764	-0.140869	-0.0167701	0.0452849	0.0784461	0.0842012	0.0869961	0.0684077	0.087843	-0.361124	-0.490908	-0.0289919	-0.0630227	-0.0773594	-0.149967	0.0384398	0.0048869	-0.0953583	-0.0887154	0.0508339	-0.165312	-0.0717261	0.0329487	-0.00541559	0.0189118	-0.00360813	0.111426	-0.0247624	-0.0895635	0.00359913	0.017668	-0.118714
ALDH16A1_Q8IZ83	0.00623709	-0.0242368	0.00311502	-0.00312176	-0.0118491	0.0218355	0.0101376	-0.0465936	0.0660746	-0.00991231	-0.0420825	0.0061889	0.0186219	-0.0139164	0.0065698	-0.00725525	0.0460703	0.00732788	0.140114	0.0322936	-0.0060871	0.0256862	-0.0358254	-0.0509575	-0.00412802	0.02163	-0.0712369	-0.044221	-0.00490948	0.110372	0.00411624	-0.0638414	0.0198818	-0.0693216	0.0119811	0.101676	0.0848353	-0.0272424	0.0110528	-0.0471769	-0.0480416	0.0250193	-0.0351227	0.00102757	-0.0010283	0.019377	-0.0404982	-0.0122418	0.0753651
BMS1_Q14692	-0.317008	-0.284223	-0.0669657	-0.165024	0.0846867	-0.281639	0.0907225	0.405666	0.114507	0.0985709	-0.0481613	0.00510187	-0.0971425	0.13716	-0.00511998	0.154212	-0.61126	-0.156	-0.120823	-0.0505729	-0.0495934	0.00846239	-0.00851232	0.0207459	-0.166478	-0.127797	0.205687	0.238012	0.201168	0.104942	0.0568631	0.235343	-0.249677	-0.224581	-0.172823	-0.337682	-0.262604	-0.187346	-0.0174729	0.166266	0.0323443	0.23524	0.385165	0.330417	0.0172639	-0.0401932	0.243825	0.0671734	-0.293118
MAP1B_P46821	-0.0586873	-0.132154	-0.0284298	-0.0383434	-0.00330039	-0.051796	0.02647	0.0467838	0.0238107	0.0248859	0.00329285	0.00510314	-0.00551951	-0.0148311	0.0244913	0.0332152	-0.0510286	-0.0134729	-0.00926203	0.00920295	-0.0274185	-0.041455	0.014397	-0.0316168	-0.0373109	-0.0239593	0.0947446	0.082524	0.0696627	0.0141892	0.0356255	0.0312345	-0.0420914	0.00349308	-0.0272304	-0.0173763	-0.0313433	-0.0601801	-0.00350156	-0.00825008	-0.00709742	0.0191946	0.0240603	0.0305006	0.0194883	0.00920753	0.0847772	0.0111752	-0.0344539
MAP1A_P78559-2	-0.125007	0.00189743	0.0127888	-0.0802942	0.0454228	-0.0510006	-0.0416189	0.108849	0.0576832	0.0146396	-0.00677833	-0.0434263	-0.0855734	0.00930565	-0.00189992	0.02755	-0.158352	-0.0241736	0.028397	0.00529335	0.0231069	-0.058365	-0.00131391	0.00548274	-0.0518258	-0.153782	0.00131271	0.0509239	0.141974	-0.014566	-0.0102729	0.0591581	-0.112296	-0.0515579	-0.0587935	-0.126684	-0.0890781	-0.101807	-0.0174482	0.076702	0.0397394	0.100704	0.27222	0.242109	0.0172397	-0.0471438	0.148684	0.0627506	-0.107672
ADK_P55263	0.000197638	-0.111684	-0.0526101	-0.000197665	0.00147222	-0.0347621	0.253727	0.148739	-0.0802519	-0.0580134	-0.00616861	0.0158495	0.0459099	0.0212456	0.0604467	-0.00752329	0.00900967	-0.0235565	0.164887	0.16865	-0.0357459	-0.0519318	-0.024729	0.0243839	-0.0455818	-0.0667159	0.213762	0.154608	0.280396	0.272141	-0.00906629	-0.0426027	0.021882	-0.00506429	0.00504658	0.00736838	0.0167557	0.0557241	0.014626	-0.0428584	-0.0516477	-0.102772	-0.0818187	-0.129034	-0.0905762	-0.0227495	0.327174	0.28256	-0.04194
PDIA5_Q14554	-0.118708	-0.149458	-0.020428	-0.0458771	0.0269936	-0.097834	-0.00815814	0.0486148	0.0332223	0.0557661	-0.0236687	0.0272818	0.00811226	-0.0131628	0.0381432	0.0491447	-0.0735321	-0.0350501	-0.0376733	0.022836	-0.0305737	0.00103921	0.0322162	-0.0490321	-0.0316489	-0.0252212	0.0907677	0.108654	0.131017	0.0754542	-0.00103996	0.0340448	-0.00071019	0.0195188	-0.0251588	-0.0886402	-0.031974	-0.0697199	-0.0541868	0.0764054	0.000709841	0.0766357	0.0885171	0.0982051	-0.0626134	-0.0376103	0.042797	0.0353757	-0.0866581
ERCC6L_Q2NKX8	0.0480639	-0.469651	-0.106581	-0.120782	0.0797312	0.0195321	-0.0937149	0.0440469	-0.210775	0.227373	-0.0198002	0.196464	-0.0875255	0.218157	-0.334118	0.0984816	-0.156136	-0.0421434	-0.0722446	0.185281	0.232738	0.0608798	0.0101032	-0.242108	-0.0276672	0.180142	-0.101101	0.0455428	0.16266	-0.0187623	-0.0101745	0.306707	-0.0302371	-0.0287657	-0.0752548	-0.208812	-0.0369611	-0.00586723	-0.0451842	0.121561	0.00584346	0.124721	0.30156	0.306536	0.0774158	0.0442706	0.140443	-0.0458556
BCL9_O00512																	0.0584299	-0.065916	0.075929	0.0915025	0.0196525	-0.131672	-0.00489636	-0.0165254	-0.0453525	0.0048798	-0.0565822	0.0557756	0.0694966	0.0638013	-0.127431	-0.0822695	0.0175474	0.0331662	-0.200571	-0.120878	0.00411895	0.061496	0.0120534	-0.317589	-0.144478	-0.150167	0.00518863	0.0299508	-0.048468	-0.118646	0.032965	-0.00413075	0.1264
DHX9_Q08211	-0.327164	-0.264063	-0.113897	-0.186635	-0.0285523	-0.271626	0.0143968	0.190179	0.0443717	0.0625338	0.0736195	0.0554835	-0.0957357	0.0620092	-0.0145419	0.109185	-0.410483	-0.16968	-0.0313398	-0.04208	-0.0301071	0.0168014	0.033694	-0.0197093	-0.0598384	-0.0169994	0.215911	0.315889	0.0655583	0.0569108	0.17436	0.21664	-0.177767	-0.186492	-0.210788	-0.378831	-0.132133	-0.137162	-0.130189	0.00994876	-0.00255723	0.170391	0.22851	0.191695	0.0025527	0.0509881	0.307247	0.189644	-0.107744
PTMA_P06454	0.0272167	-0.115068	0.00164601	-0.0272709	-0.0184807	-0.0445749	-0.041031	-0.11153	-0.00117321	-0.0323826	0.0100177	0.00121407	0.0904175	0.00753161	0.0565928	0.00117226	0.0256065	0.00478065	-0.0221832	0.0248458	0.000969013	-0.0534743	-0.0404942	-0.0540316	0.00297236	0.098279	-0.057944	-0.0456866	0.0732983	0.0440835	-0.0173192	-0.000969664	0.140273	-0.0272484	0.298905	0.054272	0.0666371	-0.0328498	-0.0357492	-0.0717666	0.0114471	0.0535039	-0.0799842	0.0121618	0.036071	-0.0545433	-0.0115386	-0.0561786	-0.0243648
SPG7_Q9UQ90	-0.0130057	-0.0883278	-0.0641363	0.0316643	0.000885226	-0.0220883	-0.0441077	-0.0656454	0.030929	0.0357479	0.00100768	-0.000885769	0.0578011	-0.0284622	0.0455033	0.00724379	0.0385779	0.0609119	0.0328648	0.024556	0.0778781	-0.03756	-0.0618564	-0.0353122	0.0608431	-0.0172813	-0.0680549	-0.10165	-0.0751251	-0.0603802	0.0170767	0.041126	-0.0112838	-0.079285	-0.00283151	0.00758306	0.0942802	-0.00802063	-0.0868403	-0.0292937	-0.0624321	0.00282597	0.0555682	0.0415585	-0.0208622	0.0406889	0.00828665	0.0644239	0.0748652
NCKAP1_Q9Y2A7-2	0.0419116	0.0313407	-0.0306522	0.0119334	0.0390841	-0.0177858	-0.000921168	-0.0555561	-0.00145243	0.0161366	0.00092058	0.0400115	0.04502	-0.0411054	-0.0308643	-0.0436723	0.0433827	-0.0831561	-0.00771183	-0.08963	0.0661797	0.0600493	0.0712851	0.0890302	-0.0175253	0.0740546	0.00767083	-0.0618553	-0.0943111	-0.0916895	0.0214048	-0.0924939	0.0357941	0.0773407	0.00264249	0.0764961	0.0185926	0.0505751	0.0186928	0.0319277	-0.0190621	-0.0460723	-0.0662404	-0.0934626	-0.00511425	-0.00264734	-0.0728183	-0.0466013	0.0122492
WDR70_Q9NW82	0.0508405	-0.0706464	0.00585134	0.00765584	0.0404943	0.00944659	-0.0107547	-0.0673402	-0.0305744	-0.0151554	0.0199965	0.0381203	0.0310334	-0.0482387	-0.00587517	-0.0262607	0.0627157	-0.0168284	0.0854405	0.012555	-0.000862803	-0.0468776	-0.0165944	0.0340392	-0.019941	0.0115185	0.0322742	0.0482721	-0.0237208	-0.00437717	0.000862287	-0.0422602	0.0359927	0.0226191	0.00722103	-0.00072745	0.0409102	0.0622297	0.0532561	-0.00529713	-0.00158374	-0.0284784	-0.0961637	-0.024832	0.0231198	0.000727083	-0.0418186	-0.0344485	0.0606274
TAGLN_Q01995	-0.220098	-0.103893	-0.0813282	0.16615	0.118846	0.111672	-0.414985	-0.414322	0.129783	0.029853	-0.274101	0.0303423	0.0874248	0.0919347	-0.0944628	-0.0304838	-0.165842	0.683781	-0.234772	-0.243486	-0.0596157	0.0313287	-0.348257	0.60615	0.817647	0.365064	0.454014	-0.0320241	-0.0561334	0.0959308	-0.11573	0.832359																	-0.0333908
CLTA_P09496-2	-0.105765	-0.156522	-0.0665129	-0.0920928	-0.0649666	-0.0277882	0.0695293	0.0133375	-0.0190426	0.001642	0.0922306	0.0334961	0.0207794	-0.00164387	0.0059562	0.0448474	-0.0410462	-0.03496	-0.0170999	-0.0229276	-0.103152	-0.000604503	-0.0399007	0.00775497	0.0731382	0.0867255	0.137108	0.022619	-0.0970588	0.00060425	0.0810822	0.00672738	-0.0438172	-0.00622157	-0.0349125	-0.0778243	-0.0282403	-0.084971	-0.033587	-0.0626395	0.0316861	0.0263823	0.00619486	0.00707997	0.0419094	0.0641781	0.152259	0.0945737	-0.0863409
TXNDC15_Q96J42	-0.00881734	-0.111212	-0.00431128	0.090715	0.0237093	-0.0873081	0.039127	-0.0441014	0.0155772	-0.0360919	-0.00171997	0.108855	0.076366	0.00171792	0.0352852	-0.0199903	0.00991455	-0.0050228	-0.0426136	-0.179521	0.0549891	0.0290812	0.00500537	-0.131032	-0.0630475	-0.0777915	0.112576	0.0270171	-0.0954996	-0.0291273	0.139791	0.0269132	0.0636001	-0.0952277	-0.194092	0.230398	0.511004	0.161084	-0.230009	-0.155002	-0.0979188	-0.0665337	0.221564	0.136352	-0.0998225	0.136588	0.123944	-0.145947	-0.528513
GSTCD_Q8NEC7	0.0648894	-0.0522548	-0.126287	-0.0166444	0.170333	-0.0855966	0.210859	0.038431	-0.0726441	-0.226051	-0.0155039	0.0500017	0.0722332	0.015339	-0.0188908	0.0190344																	0.0546913	-0.196855	0.0685241	0.0500218	0.0923333	-0.0139348	0.0651987	0.129219	-0.0922559	-0.1337	0.0840102	-0.0135731	-0.122082	-0.0605731	-0.178366	0.0134466
PTMS_P20962	0.00846452	-0.0659544	0.0148033	-0.0103997	-0.00890248	-0.0152345	0.0374352	-0.00661544	0.0263303	0.000579546	0.090249	0.0451778	0.0530371	-0.0562977	-0.000579779	-0.0211468	0.0843657	0.033669	0.000123548	0.0395321	-0.00773529	-0.0890397	-0.100976	-0.057327	0.0197221	0.0307398	-0.0904996	-0.0215816	0.109543	-0.000123559	0.0245775	-0.0419815	0.0715334	-0.0170994	0.140505	0.0646779	0.0714631	-0.0230662	0.028303	-0.0857764	-0.0273764	-0.00333749	-0.0376868	-0.039867	0.0147976	0.0553115	0.00239633	-0.00240032	-0.0196372
PPIL2_Q13356	0.0645777	0.0395147	0.0748233	0.0710507	-0.00453167	0.0911621	-0.0196676	0.00451748	-0.0179229	-0.0403545	-0.0212129	0.0293017	-0.0679285	-0.0289832	-0.0659674	0.0109237	0.0911155	0.0613811	0.0299654	0.0256631	0.0908034	0.0350663	0.0100173	0.05486	-0.0977914	-0.0104361	-0.0332207	-0.0100873	-0.0642564	-0.0982559	-0.0238918	-0.037851	0.110108	0.0390789	0.00251171	0.0575255	-0.00309433	0.084681	0.000133884	0.100149	-0.1089	-0.075155	-0.0252032	0.0016519	-0.000133896	-0.0227106	-0.133189	-0.0526109	0.157908
MTHFD1_P11586	0.0344069	0.00962354	0.0354322	0.0396969	0.0179123	0.0303394	0.089808	0.064303	-0.0411915	-0.0582079	-0.028929	-0.0128476	-0.00968817	-0.0185803	-0.0510067	-0.067221	0.0655483	-0.062502	-0.0195837	0.0148539	0.014902	0.0855386	0.072731	0.118717	-0.0486621	0.0671458	0.0231332	-0.0150085	-0.104068	-0.0503261	-0.0723445	-0.244774	0.0478923	0.032068	0.0400311	0.0974714	-0.0253515	0.0737546	0.0113014	0.0696424	-0.00219726	-0.0415713	0.00219391	-0.00826691	-0.0344737	-0.0029111	-0.0831918	-0.0260793	0.0495777
MTHFD1_A0A384N5Y3	0.0950437	0.162964	-0.0103218	0.0982844	-0.0163521	0.0626721	0.11782	0.0810607	0.0102485	-0.0340353	-0.078919	-0.0405954	-0.0185323	0.0230082	-0.0579094	-0.0683312	0.0692565	0.15333	0.0954878	0.119178	-0.0548114	0.0802213	-0.0897215	-0.019303	0.0912833	0.108097	-0.120532	-0.0421622	0.0190481	-0.0909872	-0.0841627	-0.141105	0.0213986	0.00681056	0.0638962	0.10987	0.106066	0.170933	-0.00684286	-0.0567708	-0.0242636	-0.144292	-0.052735	0.0375422	-0.0998828	-0.125617	-0.273732	0.0159017	0.120898
MTHFD1L_Q6UB35	0.0292323	-0.0647577	0.0048882	0.0492718	0.0168487	0.0237719	0.0319661	-0.0408995	-0.0463194	-0.0358627	0.0144755	0.0183205	-0.00490482	-0.0322503	-0.015265	-0.0492752	0.0739397	0.0529918	0.0548728	0.0551311	0.0184598	0.000949373	-0.000429215	0.0506685	-0.0156579	-0.0261359	-0.0482797	-0.0352462	-0.0542727	0.000429088	-0.020986	-0.121362	0.0438891	0.040881	0.041841	0.0857272	0.022153	0.0975358	0.0277035	0.018156	-0.0510214	-0.0752074	-0.0310443	-0.0183874	-0.0305551	-0.0415494	-0.105587	-0.0666294	0.117296
MTHFD1L_B7ZM99	0.0326089	-0.0746256	-0.0627116	0.00281484	0.0759705	0.117835	-0.0159528	-0.0970608	-0.0661459	-0.0371963	-0.080404	-0.00282035	0.01349	0.0347457	0.012766	0.00519597	0.158468	-0.0054322	0.133571	0.0522826	0.141831	0.0102692	-0.0141339	-0.139716	0.00822645	-0.0673963	-0.152643	0.00541183	-0.0634099	0.00582737	-0.0146623	-0.258589	0.0747904	0.0183919	-0.0361643	0.105548	0.167471	0.164821	-0.0595725	-0.0787175	-0.178531	-0.0744764	0.11831	0.396083	-0.0186294	-0.0877565	-0.247072	0.063035	0.0219681
PDCD6IP_Q8WUM4	0.120745	-0.0558591	0.19184	0.0776375	0.0958038	0.099168	-0.00922868	0.0935849	-0.106661	-0.15187	0.019045	0.00917002	-0.133751	-0.0867095	-0.165163	-0.0959933	0.23053	0.117316	0.0177722	0.000583536	0.186714	0.185004	0.116942	0.196488	-0.000583772	-0.0489583	-0.242859	-0.26981	-0.0508298	-0.183232	-0.0544763	-0.0652481	0.105274	0.00440837	0.065497	-0.0334346	-0.00442189	0.105069	0.0134401	0.143989	-0.103435	-0.0609375	0.109439	0.0435712	-0.0253983	-0.0543052	-0.116056	-0.148271	0.166101
44626_O60337	0.0486401	0.000961757	-0.0272495	0.149818	-0.00596793	-0.00141715	-0.112488	-0.292167	-0.0888232	0.101518	0.0474808	0.0184439	0.174035	-0.0658174	-0.000962398	0.063866	0.0803621	0.133446	0.0553989	-0.00481261	-0.0365438	0.00989854	-0.0265634	0.0881098	0.019605	0.147221	-0.235247	-0.185089	-0.223366	-0.092604	-0.0258505	0.00479661	0.132225	-0.0498453	-0.0248701	-0.0304448	0.0161831	0.0515331	0.0374887	0.0299631	0.0288001	0.0992861	-0.0802492	-0.127396	-0.0163667	-0.187264	-0.0925435	0.0348752	-0.0243054
PRKCD_Q05655	0.0825577	-0.0335949	0.0277519	0.0180762	-0.0172223	0.140718	0.00618991	-0.0618615	-0.00473049	-0.0312553	0.0666928	0.0205927	0.00471503	-0.0587741	-0.0530378	-0.0472955	0.00406211	0.13127	0.00150735	0.049734	0.0644805	-0.00150893	-0.0291337	0.01459	0.00248836	0.0428467	-0.196605	-0.122307	-0.0529684	-0.059764	-0.0983947	-0.0346386	0.0989273	-0.00387355	0.00386318	0.0506148	0.122166	0.0427113	0.0402376	0.0245622	-0.0450562	-0.0589146	-0.160155	-0.270101	0.00421962	-0.0459629	-0.13762	-0.0614295	0.128697
PRKCA_P17252	0.0666001	-0.0357839	0.0399506	0.0101463	0.0341416	0.0299506	-0.0159614	-0.0707938	-0.0700315	-0.120161	0.0186633	0.0135714	-0.0352894	-0.00569449	0.0056721	-0.0756163	0.15081	0.0990868	0.230529	-0.120014	0.181362	0.0527024	-0.123521	-0.0088374	0.0107919	0.0224303	-0.191649	-0.388686	-0.256054	-0.198039	-0.00562298	0.00560115	0.10042	-0.0153482	0.047805	0.115237	0.127009	0.120129	-0.000902114	0.0174221	0.0673546	-0.0386037	-0.0461802	-0.0364129	-0.0761975	0.000901551	-0.00467066	-0.0302336	0.116836
PRKCQ_Q04759	0.0853254	-0.0602672	0.0487622	0.0106537	0.0769623	0.0203772	0.00132166	-0.0552008	0.0223051	-0.0801177	-0.00132287	0.0249314	-0.0270143	-0.0255599	-0.0409837	-0.0864474	0.134559	0.0261465	-0.0272209	-0.079126	0.0289555	0.0410564	0.021309	0.027669	0.0574234	0.0148779	-0.483085	-0.508711	-0.176569	-0.15401	-0.0150329	-0.0782721	0.0912454	-0.041293	0.0698596	0.0675423	0.080702	0.0572768	0.0327548	0.0709096	-0.00776194	-0.0313469	-0.351118	-0.397338	-0.00456166	0.00454728	-0.227135	-0.142102	0.00548362
PRKCB_P05771-2	0.0220487	-0.0576205	0.0172222	0.0127781	0.0255615	-0.012125	-0.00136112	-0.0729345	0.00498515	-0.0140359	0.00386711	0.00494164	0.00135983	-0.0195275	-0.0208279	-0.0480804	0.0720805	0.052197	0.0453831	0.0239825	0.0100923	0.0291806	-0.0101634	0.0608088	0.0545269	-0.0278254	-0.101177	-0.169044	-0.0803868	-0.0777723	-0.047553	-0.0725527	0.0411927	0.0674846	0.000103411	0.0799008	-0.000103418	0.0563182	0.0373864	0.0542945	-0.0116408	-0.00231144	-0.051463	-0.0739719	-0.00694778	-0.00923338	-0.0304518	0.00173173	0.0957617
PRKCG_P05129	0.0334375	-0.149301	-0.200158	0.011423	0.031414	0.0574484	-0.0731601	0.0490377	0.280361	-0.00490172	0.00488512	-0.0713814	0.053547	-0.102312	-0.205837	-0.225988	0.047911	0.0427819	0.190058	0.0353018	0.167703	0.05044	-0.0361874	0.169581	0.0816763	-0.0528374	-0.163664	-0.189313	-0.232399	-0.0650929	-0.149758	-0.0849102	0.0550528	0.0643638	-0.0454898	0.0763621	0.0254567	-0.0757877	0.223023	0.0138194	-0.140283	-0.121672	0.0707122	-0.0139531	0.209075	-0.0551332	-0.131086	-0.0202473	0.266607
PRKCE_Q02156	0.0622273	-0.010713	0.0279798	-0.0015515	0.0323972	0.10421	0.0222451	-0.0211369	-0.00478388	0.000173306	0.114539	-0.000173327	0.0132681	-0.0387451	-0.0728973	-0.0579563	0.20019	-0.00265844	0.195928	0.00265355	0.0566793	0.15753	-0.0378105	0.0783314	0.0836052	0.0386115	-0.245755	-0.0734829	-0.0920077	-0.0927542	-0.0405655	-0.0937435	0.0420069	0.108646	0.0277085	0.0752058	-0.0146233	0.0805779	0.00250919	-0.00251356	-0.0621743	0.0594069	-0.17605	-0.159505	0.0218981	-0.0222403	-0.17276	-0.113441	0.0974046
HNRNPUL2_Q1KMD3	-0.0756019	-0.110432	-0.0325881	-0.0218603	0.0547407	-0.0694476	0.00351674	-0.00352533	0.0636676	0.041274	-0.00998086	0.0346759	-0.0784182	0.0343105	0.0365731	0.0717268	-0.103687	0.000584217	0.0708749	-0.000584454	-0.0383437	0.0310106	-0.088077	-0.0770204	0.06068	-0.0403232	-0.0338253	0.00876377	0.029278	-0.0384172	0.0396717	0.144202	-0.118844	-0.114712	-0.164985	-0.129818	-0.00969018	-0.0898519	-0.0555024	0.0254605	-0.0653746	0.0961302	0.15616	0.0901672	0.0702118	0.00962553	0.214546	0.116717	-0.107359
HAUS1_Q96CS2	-0.073124	0.00287592	0.069861	-0.00288167	0.156503	0.0209018	-0.154402	-0.185826	-0.0172854	-0.00295605	0.00319769	0.133036	-0.0475167	-0.0355482	0.0111104	0.0918965	0.0714083	-0.109229	0.00374962	-0.0336937	0.100032	0.0247161	0.00078038	-0.000780803	0.0790203	-0.145182	-0.0711962	0.166997	-0.00252957	-0.0461879	-0.0325069	0.070843	-0.0275685	-0.0700658	0.0966869	-0.00274105	-0.0695131	-0.0614855	0.0180169	0.189645	0.0146177	-0.0492114	0.00273585	0.108694	-0.0209866	0.00677048	0.100811	-0.121964	-0.0173922
MTR_Q99707	-0.0239409	-0.164059	0.0355648	0.058127	0.116988	-0.0374657	-0.0602636	0.0542072	-0.078847	0.00203398	-0.00203685	0.0389274	-0.0585345	0.0154149	-0.00530133	0.0229808	-0.0184219	0.0759749	-0.0424073	-0.0426314	0.100295	0.0524988	0.0873142	-0.0903639	0.130078	-0.0380453	-0.0157803	0.178118	0.0437468	-0.0800305	0.0156095	-0.134622	-0.024873	-0.0162226	-0.0384897	-0.034386	-0.0492134	-0.0367058	0.0130844	0.181899	-0.0132042	0.101607	0.270043	0.183494	0.0262683	-0.0618739	0.145904	0.0550116	0.0682986
AGPAT2_O15120	0.0413709	-0.269796	-0.187712	0.0359478	-0.22405	0.0466014	0.0889982	0.0163935	0.00169786	-0.00169986	0.0717938	0.0848176	-0.065136	-0.0778556	-0.0497281	-0.0896229	-0.0849562	-0.175923	-0.00572157	0.00693475	0.0945192	-0.219919	0.228923	0.195772	-0.0035975	-0.0159964	0.108171	0.463922	0.0318241	0.00358856	-0.100507	-0.0417154	-0.00765356	-0.0795239	0.0212859	0.156282	0.197355	-0.0644409	0.00882434	-0.0538621	-0.104335	-0.0103585	-0.0255682	0.0319869	0.00761317	0.0799395	-0.00917869	0.0469449	-0.0713955
INTS10_Q9NVR2	-0.00725723	-0.0184963	0.110721	0.0888662	0.118934	-0.0200324	-0.00188434	-0.0668108	0.020699	-0.0502607	0.00188188	0.0899759	0.0112959	-0.0806032	0.0922297	-0.116053	0.126664	0.0180477	0.135812	-0.00919526	0.210594	0.0323273	-0.0191377	0.0890182	0.00913703	0.0524283	-0.127386	-0.0452691	-0.0197115	-0.313051	-0.0400832	-0.0318962	0.139463	-0.0114258	0.0168504	0.141172	-0.00665474	0.174571	0.0162405	0.00662418	0.0266009	-0.0590186	-0.0278518	-0.0761888	0.0691675	-0.11108	-0.0330246	-0.0762545	0.0913277
VPS18_Q9P253	-0.0645479	0.147155	0.0991583	0.077556	0.0446348	0.0388768	-0.10015	-0.0946192	-0.0695859	-0.0735687	0.0755009	0.00417644	-0.0530495	-0.00418856	-0.00599463	0.0336251	0.018474	-0.000464923	-0.150871	0.00995465	0.10777	0.069293	0.0970619	0.020777	0.0776854	-0.0864762	-0.265101	-0.197523	-0.0532126	-0.0283337	0.000464773	-0.119168	0.0413338	-0.00442456	0.108835	0.0633911	-0.109631	0.00616984	0.0439725	0.00325256	-0.0615898	-0.130082	0.104255	-0.00325991	0.0162581	-0.00789875	-0.137186	-0.0978891	0.0830612
DENND4B_O75064	0.0825282	0.00904454	-0.000454414	0.0802562	0.0157462	-0.311438	-0.283305	-0.172329	0.0271063	-0.0485342	-0.29183	-0.104499	0.0185729	0.000454271	0.010976	-0.0159247	0.163141	-0.0427811	0.164685	-0.0652505	0.0638511	0.0239669	-0.0885066	0.174968	0.0407357	-0.0211009	-0.0232901	-0.170709	-0.0740643	-0.0367787	0.106265	0.0207967	-0.158638	-0.13389	-0.00287264	0.0165164	-0.0167124	-0.0631166	0.0496826	0.0775787	-0.286366	0.069863	0.126723	0.0596902	-0.0376409	0.0165393	0.00286693	-0.0866236	0.0522044
FAM83D_Q9H4H8	0.115263	0.0112301	0.236425	0.0204051	0.0696412	0.0920447	-0.032279	-0.0113182	0.0112552	-0.116401	-0.0133633	0.0536315	-0.0381683	-0.150009	-0.114055	-0.0227609	-0.13787	-0.246085	-0.00771047	-0.263385	0.0410418	0.0915723	0.159895	0.130136	0.00711827	0.0434196	0.0906701	-0.00715356	-0.293715	-0.32203	0.0106757	-0.239937	-0.0150174	0.00912653	-0.143218	-0.00351128	-0.00558915	0.0600044	0.0158021	0.0869834	-0.0619727	-0.0238064	0.00350275	0.0245166	0.0563855	0.0630401	-0.147979	-0.0281859	-0.0610275
WNK4_Q96J92
WNK1_Q9H4A3-7	0.0328843	-0.0735435	0.0267224	0.0378791	0.0499238	-0.0202118	-0.0336963	-0.0429208	0.0295327	-0.00111895	-0.0118274	0.0235975	0.0559742	-0.0360378	0.00111808	-0.0229681	0.0337594	-0.000807914	-0.0200302	0.0204669	-0.0423983	-0.0572922	-0.00282563	0.0942116	0.0240828	-0.0227533	0.00730382	0.02981	-0.0652444	0.000807461	-0.029191	0.0191973	0.0539098	0.00108113	0.169021	0.187184	0.0276998	0.0184753	-0.00650155	-0.00583081	-0.0275306	-0.017449	0.0224489	0.0383405	-0.00480791	-0.00178287	-0.0124124	-0.00108194	0.0219153
RBM28_Q9NW13	-0.658964	0.6414	0.154729	0.0169034	-0.525524	-0.0171038	-0.529245	0.14694	0.418089	-0.391803	0.0365169	0.459183	-0.316754	-0.245703	-0.256094	0.195792																	0.0194539	0.0935109	-0.234804	0.258856	-0.139928	-0.519757	-0.274808	0.10279	-0.0197198	0.205881	0.0221383	0.13159	-0.158554	-0.0858924	0.0422938	-0.323671
USP8_P40818	0.0833416	-0.104639	0.0858362	-0.00736816	0.0185776	-0.0434861	0.0421934	-0.0110612	-0.0379065	-0.0996401	0.0472863	0.00733072	0.0793794	0.0200241	-0.108709	-0.021202	0.110693	-0.111729	0.0822478	-0.00509702	0.0709909	0.00507908	0.0113303	0.113762	-0.0927566	-0.12778	-0.226519	-0.150273	0.0239932	-0.103471	-0.0932326	0.0445516	-0.021703	-0.090021	0.136624	-0.0316734	0.0289343	0.0284606	-0.0356946	0.122224	-0.0220974	0.0992152	0.169279	0.130262	0.0031435	-0.053605	-0.00315036	-0.0154354	0.0569697
RELCH_Q9P260-2	0.0874349	-0.16874	0.145847	0.304776	0.171108	0.0850677	-0.121008	-0.0634864	-0.0394981	0.101703	-0.0290212	0.0200356	0.0248576	-0.0203178	-0.0959422	-0.0718879	-0.275557	0.269308	0.086804	-0.0211769	-0.460206	0.157619	0.044284	-0.396126	-0.0494246	0.0332047	0.0556389	-0.385421	-0.35816	0.286968	0.0208706	-0.0288362	-0.0017556	0.0920769	0.0207812	0.0796974	0.295996	-0.156657	-0.0514198	-0.0842883	-0.323125	-0.0384666	0.00674644	0.00175347	-0.0943084	0.0839671	-0.189236	0.103435	0.0698403
PIK3CB_P42338	0.0229806	-0.047986	0.0834839	0.0712115	0.0620988	0.093159	-0.0240316	-0.126719	-0.0550018	-0.0131777	0.0782497	0.101856	0.0130584	-0.112046	-0.0696308	-0.0661812	0.0522974	-0.0100588	0.261192	0.254281	0.0207374	-0.0178053	0.0459043	0.00998913	-0.0293616	-0.0288812	0.179908	0.170359	-0.0170377	-0.0645407	-0.0472045	-0.0942817	0.002645	0.0639093	-0.0765903	0.0720998	0.0677559	-0.0396386	-0.00127499	0.0862404	0.00032118	-0.0154791	-0.00143517	0.0684661	0.0511417	-0.041695	-0.0516651	-0.000321252	0.0696257
PIK3CD_O00329	-0.0353776	0.0345308	0.258541	-0.0661608	0.238493	0.338216	-0.242832	0.308152	0.116735	-0.0866829	0.226194	0.256211	-0.0552262	-0.2186	-0.188859	-0.142896																	-0.157663	-0.0638277	-0.277239	-0.178964	-0.12646	-0.125522	-0.19677	0.00148066	0.0514344	0.0817828	0.0882609	0.191805	0.0366068	-0.00148218	0.0793025	0.0311987	-0.0305137
MAN2A1_Q16706	-0.0123065	-0.0659663	-6.24873e-05	0.0187096	0.0338943	-0.00844873	0.0155558	-0.0461125	6.24846e-05	-0.04409	-0.00515387	0.060121	0.0604895	-0.0365482	0.0495515	0.0422139	-0.0113405	-0.0400108	-0.0804115	-0.0671636	-0.0385553	-0.026639	0.0223738	0.0240431	0.00824997	0.0446034	0.0375946	0.0771681	0.0209489	-0.0416249	-0.00829742	0.043627	0.0518027	0.0067293	0.0152456	0.030666	0.0196699	-0.0582312	-0.00984031	-0.0101619	-0.0420454	-0.0111714	-0.0218461	0.0299748	-0.00388282	0.0603663	-0.0650932	0.0038724	-0.0322535
MAN2A2_P49641	-0.0181944	-0.0759898	-0.0228134	0.0016671	0.0790675	-0.0418751	0.0651713	-0.00166903	-0.0637643	0.0214048	0.0368557	-0.0190621	0.0264394	-0.0599148	0.0253547	0.0251887	-0.0111965	-0.0395413	0.124178	0.0538546	0.0462044	0.00440247	0.00252246	-0.00507561	-0.0498071	-0.0372232	-0.00252687	0.106437	0.0224879	-0.0150701	-0.00532887	0.014951	0.0205195	-0.054822	-0.00184055	0.00771308	-0.0762339	0.00183821	-0.137384	0.0537542	-0.0422112	-0.0705556	0.0219772	0.150177	0.118643	-0.232819	-0.0500923	0.0129539	0.000982443
XAB2_Q9HCS7																																																	-0.0382238
ECPAS_Q5VYK3	-0.00701818	-0.0989347	0.0500714	0.0231386	0.0545472	0.0271234	0.0171671	0.0457079	-0.0595755	-0.0810378	0.00698421	0.010298	-0.0799038	-0.100575	-0.144331	-0.108822	0.112724	0.0184722	0.0343311	-0.0251411	0.0760341	0.0772628	0.0790786	0.131799	-0.0217103	0.0128849	-0.122268	-0.163278	-0.0466508	-0.183299	-0.013001	-0.0441972	0.0548653	0.000698898	-0.000699236	-0.020884	0.0222134	0.0720406	-0.00409902	0.0701007	-0.0238113	-0.0152657	0.0985707	0.0630054	0.0187639	-0.0381651	-0.0258396	-0.0404888	0.089823
DNAJC17_Q9NVM6	0.0299307	-0.10156	0.076357	0.00578764	0.00298225	-0.0288668	-0.0453283	-0.174946	-0.0038233	-0.00298843	0.0223342	0.0534326	0.0220396	-0.0937381	-0.0743324	0.0757676	0.0471899	0.116826	0.10807	0.133411	0.0421307	-0.28595	-0.0373243	0.0602244	0.192873	-0.136662	-0.0716423	-0.00384291	-0.210534	-0.0358777	-0.113855	0.0038327	-0.0353907	0.0616504	-0.00406325	0.0580524	0.167689	0.0411415	-0.0207887	0.00214394	-0.0364049	-0.0177155	-0.00176237	0.0328035	-0.0119388	0.00176022	0.00951131	-0.0528291	0.0711747
PFDN2_Q9UHV9	0.0103473	-0.107102	0.00242072	-0.0092676	-0.0129158	0.0340273	-0.00242479	-0.0871252	-0.0308736	0.0111688	0.0130624	0.0400321	-0.010329	0.00768698	0.0268905	-0.00671748	0.0554306	-0.0233521	0.0487412	0.0284327	0.0184315	-0.0581848	-0.015005	-0.0277429	-0.00574697	-0.0033444	0.02222	0.00333667	-0.0377961	-0.0437603	0.0291102	0.0118729	0.0572204	0.000321302	0.0610192	-0.0330694	0.0402726	0.0247196	0.0471378	-0.0513389	-0.0315398	0.0185297	-0.0362164	-0.00204738	-0.00580964	0.0113363	-0.0323079	-0.000321374	0.0737407
PTRH1_Q86Y79																	0.121442	-0.192184	-0.0607903	0.0416695	0.144025	0.206455	-0.00861955	0.0693454	-0.420456	0.189881	-0.0679621	-0.293152	0.203398	0.00856836	-0.258086	-0.27188	-0.00809685	-0.154684	-0.0431176	-0.157106	-0.164558	0.00805166	-0.163228	0.0877998	0.0159945	0.0664336	0.182117	0.276734	0.0122971	-0.0208516	0.0499164	-0.0720335	-0.00312727
POLE4_Q9NR33	-0.04101	-0.0259244	0.00171676	0.0760257	0.0724906	-0.0600096	-0.0361438	-0.00171881	-0.120818	-0.02827	0.0527306	0.116559	0.115628	0.0410797	0.0765162	-0.060821	-0.15729	0.0359913	0.100307	-0.165136	0.00606988	-0.00609552	-0.147764	0.285309	-0.204844	-0.172957	0.250011	-0.263085	0.179008	0.0131454	-0.149609	0.138238	-0.0163722	0.152742	0.231053	0.085853	0.240293	0.137408	-0.00955326	0.227169	-0.442123	-0.14979	-0.315806	-0.0878599	0.00949041	0.145331	-0.23544	-0.0544627
GSR_P00390	-0.00115053	-0.0941355	-0.0493305	-0.0105783	0.00571598	0.0430092	0.0149356	-0.0768267	-0.0426183	0.00114961	0.011622	0.00229141	0.0175996	-0.0269273	0.0475678	-0.0355095	0.0991974	-0.0369358	0.0716405	-0.000379182	0.0470492	-0.00877201	0.0330975	-0.0332448	0.000379082	0.0332439	-0.00305588	-0.0372716	-0.033141	0.0364116	0.0132044	-0.0289799	-0.0209167	0.0309842	0.00859185	-0.00400661	0.0518231	0.0369564	0.0113774	-0.0891818	0.0159913	-0.0218431	-0.0623752	-0.106772	-0.0527952	0.0473626	0.00399552	-0.00440188	0.00708353
PHB_P35232	0.0251655	-0.0502481	-0.0251687	0.0164689	-0.0353893	0.0291643	-0.0177606	-0.0650493	-0.0435421	0.0428888	0.030129	-0.000720824	-0.00975178	0.0174603	0.0255371	0.000720464	0.0249525	-0.0210211	-0.0467757	0.00554119	-0.031554	-0.0194566	0.000450765	-0.0249317	0.0451546	0.0427455	0.0397941	0.0211556	-0.0476621	-0.0072048	-0.000450905	0.0326765	-0.192788	0.0637281	0.0181847	0.046361	0.0651836	0.0454966	0.0370187	-0.065667	-0.292368	-0.0656767	-0.0405434	-0.188687	-0.0151622	-0.0255536	0.0150045	0.0299325	-0.082634
LTN1_O94822-3	0.0193491	-0.0592648	0.0111744	0.0732976	0.0232463	0.0759323	-0.0420439	-0.0304771	0.0330714	0.053121	-0.0356402	-0.0066001	-0.0364409	0.00657004	-0.0832461	-0.0322869	0.138058	0.114138	-0.139928	-0.173176	0.1518	0.1436	0.00889344	0.0690606	0.062299	-0.00202953	-0.517369	-0.477686	-0.214461	-0.25299	0.00202668	-0.0396174	-0.00923059	0.014423	-0.100247	-0.0791349	-0.00167077	0.0319464	-0.0488706	0.12661	0.00404594	0.00166883	0.143814	0.111374	0.0133743	-0.0242225	-0.0274354	-0.0572488	0.0739589
ATP12A_P54707-2	0.0713686	-0.0899111	0.0320208	-0.00104299	0.000440146	0.0287903	0.0545431	-0.0030546	-0.0060389	-0.0103706	0.0260897	0.0255913	0.0491542	-0.0311345	-0.00044028	-0.0527904	0.0497621	-0.0194994	0.130323	0.0698297	-0.000399722	-0.0704648	0.000399611	0.0208982	0.0585944	-0.0128242	0.25399	0.229839	-0.0153486	-0.0784252	-0.0175093	-0.0447654	0.0586333	-0.0347898	0.0883532	0.0441901	0.0848447	0.0382661	-0.00235358	-0.028053	0.0271405	-0.0575302	-0.0753815	-0.0980369	-0.105092	0.0191902	-0.0546252	0.00234975	-0.0040359
ATP1A1_P05023	0.00363466	-0.0726466	-0.0149475	-0.024622	-0.0237565	0.0159178	0.0492737	-0.0125845	-0.0010099	0.0010092	0.00339471	0.0209209	0.0643757	-0.00431873	0.0273872	-0.01023	-0.0644948	-0.0627544	-0.00514945	-0.0406856	0.00513113	0.0551381	0.112162	0.0920471	-0.0236954	0.10527	0.312582	0.207967	-0.0463348	-0.051685	0.0577225	-0.108759	0.0394222	0.026537	0.0645427	0.0153882	0.052811	0.0501217	0.058912	-0.0546714	0.00300817	-0.0263676	-0.149759	-0.0843163	-0.0169247	-0.00301445	-0.0284442	-0.038685	-0.0647028
ATP1A3_P13637-3	0.0140458	-0.126143	0.00481147	-0.00482757	-0.0473637	-0.00737856	0.00698714	-0.0153598	-0.0106411	0.0072537	0.0131811	0.016404	0.0127646	-0.0278163	0.0175474	-0.0182124	0.0583979	0.00855821	0.119683	0.0416081	-0.0185656	-0.0457848	-0.0169548	-0.0603296	0.0941613	-0.00860929	0.196828	0.129305	-0.0629639	0.0325987	-0.0198059	-0.0247121	-0.0227201	0.0226134	-0.0282931	0.0113688	-0.0114591	-0.0247626	-0.0182744	-0.085571	0.022668	0.0507254	-0.06401	-0.114122	0.0448521	0.114962	0.0818589	0.0549486	-0.098366
ATP1A2_P50993																																																	-1.43125
ATP1A4_Q13733	-0.0764157	-0.0668118	0.0176028	-0.0171581	-0.0275823	0.0403591	0.0594804	0.0169565	-0.0335194	0.0323456	0.0733913	0.0516197	0.0561735	-0.0813007	-0.081713	-0.0863771	-0.0279902	-0.17165	0.0172212	0.0139124	-0.0032161	-0.000243569	0.000243528	0.0715395	0.052556	0.0172671	0.239514	0.279516	-0.0337272	-0.0191418	-0.0798352	-0.0325713	0.0850913	-0.0161187	0.09087	-0.034897	-0.117553	-0.166386	0.0307956	-0.0191194	0.0159406	0.103978	-0.064154	-0.0672783	0.0462699	0.0661314	-0.0282634	0.0588147	0.0739941
PCID2_Q5JVF3	0.0191539	-0.065204	0.0151014	-0.0479746	0.10572	0.0218417	-0.0102842	0.15062	0.0715393	-0.148101	0.07507	-0.0189923	-0.0395675	0.0102114	-0.101994	-0.257977	-0.0685316	-0.0875404	0.147412	-0.121885	0.330789	0.0672213	0.0654232	0.0897163	0.25128	0.268831	-0.0911256	-0.0808415	-0.0951322	-0.202363	0.167947	-0.0980029	-0.0575166	-0.197421	0.00273058	0.07246	0.217645	-0.103305	-0.151293	0.012246	-0.287034	-0.118759	0.355456	0.136088	0.0254079	-0.166891	-0.00273576	0.0270512	0.091947
MSTO1_Q9BUK6	0.0806063	-0.0323525	0.014024	0.0602422	0.128825	0.109433	-0.0400784	-0.0199264	0.0202248	-0.0313152	0.0526457	-0.0377871	-0.0141617	0.0323368	-0.0227317	-0.0594919	0.133842	0.0867706	0.0438111	-0.00220886	0.106854	-0.00155626	-0.000342094	0.0563989	0.0428333	0.0326859	-0.16312	-0.207171	-0.00656013	0.000342013	-0.0764639	-0.161302	0.0615627	-0.0347961	0.0673115	0.0607719	0.104697	-0.0130278	-0.0563811	-0.032778	-0.0788285	-0.112611	0.0310368	0.0192969	0.0129112	-0.15561	-0.0736021	0.0706274	0.104941
AFDN_P55196-5	0.00491231	-0.095363	0.0155513	0.0151988	0.0678612	0.0193819	0.0140294	-0.0378088	-0.0227011	-0.0328956	0.00530851	-0.0049291	0.011943	-0.0365424	-0.0377616	-0.0424216	0.152191	0.0375521	0.0273228	-0.0461721	0.0169387	0.021128	0.0280082	0.0418853	0.0460474	-0.0171399	-0.350685	-0.356173	-0.138814	-0.178238	-0.0835021	-0.114045	0.0841008	0.0453271	0.025478	0.0618208	0.000450399	0.110159	0.01052	0.0150874	-0.000450539	-0.0523303	-0.0943125	-0.0935815	-0.0260343	-0.0204219	-0.124416	-0.0662363	0.0504595
AFDN_P55196-1	0.0389036	-0.0419995	-0.0924656	0.00160813	0.0380681	0.170779	-0.0389992	-0.0663586	-0.131305	-0.00160993	0.0245641	-0.0600801	-0.0353024	0.00529309	0.0198958	0.0553412	0.106626	-0.0628408	-0.146821	-0.141628	0.104708	-0.170692	-0.125991	-0.0283663	0.0267072	0.173758	0.0761919	0.0487722	0.335307	0.0303424	-0.027211	-0.122047	0.032738	-0.112039	-0.151901	0.0969908	-0.363123	0.124194	0.00797063	-0.0272205	0.0978409	-0.126352	0.127278	0.0938806	0.379728	-0.025005	-0.356503	-0.00801491	-0.016334
WDHD1_O75717	0.0666798	-0.00162755	0.0154453	0.0935585	0.0624515	0.0811707	-0.00115971	-0.0168105	-0.0424291	-0.0359218	0.00115877	0.0742138	0.0142796	-0.00237365	-0.0213333	-0.00725594	0.151289	0.0328693	-0.0658262	0.036197	0.115212	0.123279	-0.0235107	0.0394112	-0.0129169	0.0686679	-0.138441	-0.098298	0.00821043	-0.0655259	-0.058439	-0.00825742	0.0840441	0.0457947	-0.0165647	0.0760698	0.0736422	0.0960047	0.0017667	0.0596746	-0.00176887	-0.0234295	-0.0215776	-0.0288888	0.0351958	-0.00501124	-0.159834	-0.109809	0.137735
SCLY_Q96I15	-0.0201063	-0.0898798	-0.0473972	0.0176131	-0.0152991	0.048791	0.0376327	-0.0493485	-0.035384	0.0302854	0.0158349	0.013082	0.0482335	-0.0521688	0.0312916	-0.0132017	0.0260293	-0.0314541	0.0547247	0.00740026	-0.0349249	-0.0478435	0.0364197	-0.00743841	-0.0565961	0.0807692	0.112809	-0.0497691	0.108359	0.0362414	-0.0338555	-0.0210281	-0.0272954	-0.00608227	0.0495753	0.0355232	0.0850384	0.00448348	0.0913588	-0.0338295	0.0529381	0.0215702	-0.0811379	-0.102364	0.0475695	-0.0123829	-0.00449746	-0.0560328	-0.0619576
GOLGA2_Q08379	-0.110156	-0.0772536	0.0116973	0.0141993	0.010955	0.0347998	-0.0659795	0.0483129	0.0097708	-0.0482593	0.153606	0.0301825	-0.0446381	-0.062241	-0.0948831	-0.00983743	-0.133763	-0.0171678	-0.0425314	0.0393021	0.0440274	0.107949	-0.0202485	-0.0250245	0.00561828	-0.11118	0.00889752	0.0557935	0.163685	-0.0487707	-0.00564024	0.0817753	-0.0623293	-0.0532649	-0.0920746	-0.131011	-0.0362264	-0.0263518	0.0199225	0.173797	0.0085499	0.125414	0.257013	0.215474	0.0794406	-0.00906693	0.140675	-0.00860087	-0.135796
MTPAP_Q9NVV4	-0.129532	-0.118448	0.0701827	-0.0223546	0.112499	-0.0692157	-0.0394825	0.221747	0.157684	-0.0522841	0.0803741	0.1432	-0.0494121	0.0551189	-0.035418	0.0220135	-0.117336	-0.0512933	-0.0197226	-0.203764	0.215844	0.129437	-0.0754287	-0.0858485	0.0435881	0.014474	-0.0998456	0.0138629	-0.0139974	0.0625738	0.0617338	0.0594803	-0.208159	-0.0257977	-0.163821	-0.161862	-0.252184	-0.146981	-0.0844346	-0.00450217	0.0172564	0.0733979	0.223891	0.124421	0.0457103	0.00448817	0.0955264	0.14682	0.0311165
SYVN1_Q86TM6	-0.0077304	-0.115922	-0.0366734	0.0196161	0.0387331	0.0119881	0.00768919	-0.122155	0.00909452	0.0134144	0.0935512	0.0623879	-0.0463387	-0.0875883	-0.0105103	-0.0112853	0.0292244	0.025115	0.164524	0.0158723	-0.0325995	-0.0514661	0.011177	-0.0112643	-0.0206267	-0.0947356	-0.0206431	0.0592169	0.0751845	-0.0556754	0.0520054	-0.0536867	0.0463365	-0.00326844	0.0370671	0.0207515	0.0967632	0.0731079	-0.0238718	-0.0190777	0.0242102	-0.0386779	-0.0550526	-0.110916	0.00326105	0.0193416	-0.10189	-0.0364732	0.0115208
IGBP1_P78318	0.0123475	-0.0115794	0.0204624	0.0114872	0.0501513	0.130028	0.0610364	-0.0290017	-0.024302	-0.0486231	0.0939772	0.0150415	-0.0115818	-0.0894899	-0.0402656	-0.0206819	0.125851	0.0464749	0.0662633	0.0595586	0.05947	0.00514316	-0.020476	-0.0120562	0.0732484	0.012583	-0.120938	-0.114833	-0.0569069	-0.0523954	-0.00516156	-0.0625716	0.015927	0.016397	-0.145216	0.0206625	0.105554	0.157683	-0.010617	-0.0260885	-0.0702844	0.0211946	0.0105395	-0.0419936	-0.0698994	-0.0797711	-0.0749252	0.0233094	0.180556
KIF5B_P33176	0.0109237	-0.0265266	-0.0337017	0.00916484	0.0334559	0.00153594	0.0206401	-0.000904328	-0.0152505	-0.0280563	0.0372189	0.0255215	0.000903762	-0.0517456	-0.0336402	-0.0452808	0.0373967	0.0110314	0.04167	-0.00744899	-0.00182656	0.00630988	0.0073441	0.00247909	0.00567518	-0.0642217	0.00182425	-0.024301	-0.0633504	-0.0723712	-0.0381453	-0.0668508	0.0863447	0.0633065	0.0052381	0.0615816	0.0329865	0.0862664	0.0328962	0.0480117	-0.00525718	-0.056262	-0.0589103	-0.0338152	-0.0653592	-0.0171444	-0.0703549	-0.0504034	0.00309445
KIF5A_Q12840	-0.00627485	-0.0477608	-0.0018122	0.0794782	0.0512302	0.0186944	0.00373755	-0.0464345	0.0158971	-0.0219685	0.00180993	0.034607	0.0208345	-0.0369233	-0.0424105	-0.00579174	-0.0170569	-0.0409344	0.0168576	-0.084307	0.0281478	0.0239044	0.0614712	0.0999332	-0.0327766	0.0398567	0.064989	-0.0397427	-0.0694233	-0.115873	0.0537461	-0.145618	0.0694209	0.0308162	0.00612216	0.0293008	0.016845	-0.0143573	-0.0475612	0.0177432	-0.0411093	-0.0300286	-0.00616916	0.0524697	0.0114534	-0.0145956	-0.0325412	-0.00614825	0.0712592
TOM1L2_Q6ZVM7																																	-0.0600979	-0.00700211	-0.0424714	0.0993882	0.232784	0.0439392	-0.078289	0.00696829	0.0658311	0.187253	0.18659	-0.0135827	-0.168376	0.167159	-0.334991	-0.378589	0.0071854
SLC7A6OS_Q96CW6	0.0114906	-0.111852	0.00836	0.0115546	-0.0513995	-0.0687633	-0.0246544	-0.0989079	-0.000387444	0.00038734	0.051864	0.0325672	0.0273658	-0.0815311	-0.0557239	0.0046872	0.00260447	-0.00260918	-0.0572478	0.0948968	0.0872658	0.0254402	0.143932	0.155371	-0.0384148	0.0566709	-0.0257373	0.135104	-0.0828651	-0.0794281	-0.0324312	-0.0436865	-0.075896	0.043489	-0.00380514	0.0561819	0.00264936	-0.0880704	0.116382	-0.0236133	-0.00265423	0.0391419	-0.16426	-0.100833	0.0569513	0.00680938	-0.00620236	0.0542822	0.019516
KIAA0930_Q6ICG6-2	0.0652343	-0.0439585	0.039292	0.127682	-0.138522	0.0646556	0.0137652	-0.0406963	-0.0138978	-0.036427	-0.0688501	0.080163	0.26024	0.096219	-0.0625796	-0.12313																	-0.0462125	-0.46995	0.0797029	0.538398	-0.131001	0.044778	-0.243877	-0.240491	-0.369913	-0.232985	-0.0931272	0.418088	0.264177	0.307834	0.217911	0.06297	0.0456748
KSR1_Q8IVT5	0.0428097	-0.0123834	-0.0192862	0.0460225	0.082888	0.0326282	-0.0519968	0.121732	-0.0389721	0.0413881	0.103693	0.0122781	-0.100343	-0.0676649	-0.0713382	-0.0160893	0.186053	-0.0175713	0.394811	-0.0427058	0.0825764	-0.0571155	-0.13961	0.034909	0.0173599	-0.12958	-0.920013	-0.835488	0.0497918	-0.184697	0.0254478	0.330772	-0.0463054	-0.0274272	0.0338978	-0.0271665	0.0357679	0.0292959	-0.0687614	0.100327	-0.0621356	-0.00233325	0.0842951	0.0090005	0.0343572	0.00232949	-0.106265	-0.163321	-0.0141326
KSR2_Q6VAB6																	-0.348214	0.201549	0.248042	0.12218	-0.105968	0.260596	-0.00929512	-0.0392805	-0.00586998	-0.299725	-0.061385	0.0475063	-0.0328945	0.0602709	0.0058462	0.41161
NEMF_O60524	-0.164659	-0.240289	0.106669	-0.118268	0.00632444	-0.184604	0.0943826	0.448404	0.143001	0.0837445	-0.00635228	-0.022473	-0.121941	0.178134	-0.0862495	0.125373	-0.420309	-0.115519	-0.140474	-0.145655	0.00187499	0.0283818	-0.00187743	-0.0561676	-0.110727	-0.178251	0.0961291	0.204319	0.328782	0.0964212	0.0829493	0.175368	-0.302517	-0.231155	-0.182686	-0.310308	-0.271566	-0.180915	-0.0201727	0.118305	0.0279544	0.234323	0.358286	0.261014	0.0198945	-0.08958	0.33637	0.107207	-0.213619
CCNK_O75909-4	-0.0501464	-0.11579	-0.0297997	-0.0967403	0.0270842	-0.102112	0.0690326	0.142713	0.0521322	0.00289566	-0.00290148	-0.023783	0.0536995	-0.0128008	0.00785208	0.082508	-0.309269	-0.240337	0.00719082	-0.0725926	-0.00722684	-0.0352932	0.0169864	-0.059348	-0.139448	-0.0943201	0.0217077	0.043079	0.287189	0.360259	0.141141	0.116374	-0.0121222	-0.0153255	-0.0847989	-0.150613	-0.0994859	-0.130033	0.107578	0.218481	0.0879453	0.125731	-0.00190971	-0.0825851	0.00190718	0.135836	0.0250428	0.0197386	-0.00501373
TNKS1BP1_Q9C0C2	-0.0363714	-0.0990534	-0.0233218	-0.0168901	-0.00145485	-0.0277762	0.00145339	-0.0784718	-0.0319636	0.0112245	0.0199991	0.02181	0.0526855	0.0354522	0.0389028	0.00202511	-0.0289779	-0.0358117	-0.0156051	0.0394093	-0.0188379	-0.0672136	-0.0266837	-0.0372818	-0.000340489	0.0432873	0.0262739	0.000340408	0.0352709	0.0740556	0.0325993	0.0178019	-0.0998076	-0.0373233	-0.00482512	0.0361051	0.0431518	-0.0614637	0.00480903	-0.0769056	-0.0472534	-0.00890215	-0.0120827	0.0174063	0.0197965	0.0284877	0.0334554	0.00852636	-0.0470948
C9orf40_Q8IXQ3	-0.0379743	-0.105681	0.0377176	0.0514924	0.0431418	0.0318179	-0.0832784	-0.205551	-0.0888876	-0.0156483	-0.0436842	0.01284	0.0582818	-0.0129553	0.0585486	0.0236666	0.146226	-0.0207572	-0.132804	-0.036567	0.0879465	-0.0218941	0.24597	0.180106	0.0204627	0.195275	0.0401137	-0.065261	-0.0267056	0.08794	-0.0392712	-0.203403	-0.106976	0.0931605	0.0440625	0.12707	0.0751796	-0.191878	-0.062799	-0.0369695	-0.0886686	0.0579239	-0.043992	-0.0651508	0.0360457	0.108605	0.0608582	-0.0598597	0.101702
CLTC_Q00610	-0.0630801	-0.0425249	-0.0118966	0.00248048	0.0177411	-0.056382	0.222395	0.154988	-0.00303724	-0.011404	-0.00248475	0.0107327	0.120145	0.11102	0.00542733	-0.0222773	0.0176825	0.0115235	0.0598178	0.0125756	0.00404863	-0.0344467	-0.0266376	-0.00406002	0.027267	-0.0290215	0.208696	0.136689	-0.019842	-0.0554521	-0.0685559	-0.0812875	-0.00463412	0.0174296	-0.125341	-0.0714233	0.00461928	0.028059	-0.0111543	-0.00624095	-0.00658917	0.00477698	0.125938	0.0658545	-0.0172824	-0.0156162	0.191721	0.172057	-0.0357556
PFKFB4_Q16877	0.0172681	-0.00941728	0.0104862	0.0901092	0.00807588	0.0699051	-0.102188	-0.200208	-0.00812134	-0.00987358	0.0288976	0.0600143	0.0569565	-0.0109054	-0.0432409	-0.0178635	0.159517	-0.0426049	-0.0279077	-0.0155311	0.0676098	-0.0491842	0.0669675	0.0978508	0.244662	0.0153657	0.0724915	-0.0572776	-0.114345	-0.0436246	0.0998115	-0.0696163	0.0163069	0.0143941	-0.0885322	0.0990895	0.0652368	0.0472683	-0.0442695	0.0354639	-0.0258803	-0.0668898	-0.04349	0.046749	0.0316433	-0.0715141	-0.0441384	-0.0145391	0.0425608
PFKFB3_Q16875-4	0.0185275	-0.0934459	0.0399195	-0.000581755	-0.0146986	-0.0747295	0.013483	-0.0868074	0.0206519	-0.03823	-0.0585512	-0.0679828	0.0516427	0.00058152	0.0117029	0.0282744	0.145486	-0.00564738	0.0169567	-0.0994744	0.0546482	-0.00450085	0.00463641	-0.0733009	0.0409227	-0.0525665	-0.096214	-0.133845	0.127215	0.00448686	-0.0313095	0.0116594	0.00707652	-0.000719148	-0.03391	0.020075	0.00157902	-0.0304901	0.0342924	0.15179	0.000718789	-0.0333973	-0.0153179	0.0380739	-0.0518521	-0.0876497	-0.0736081	0.0405222	0.100284
PFKFB2_O60825	0.0580024	-0.0307645	0.0396638	0.0486841	0.000681785	-0.0325118	0.00887023	-0.000682107	-0.0153538	-0.00369784	-0.0778709	-0.0493184	0.0712333	-0.0132201	0.0611195	0.0275861	0.058508	0.00841335	-0.0466996	-0.0673354	0.000194664	-0.000190082	0.016385	0.0227263	-0.0119337	0.00165208	-0.144525	-0.159021	0.000190057	-0.0274181	0.0257349	-0.0171001	-0.0277433	0.0127256	-0.03128	0.0656174	0.071082	0.0240717	0.0152081	0.00454069	-0.0667453	-0.063388	-0.0507448	-0.0454592	-0.00455503	0.0178182	-0.0527889	0.0143575	0.00282638
PFKFB1_P16118	0.0473403	-0.0625736	-0.0389002	0.138826	0.030789	0.0349458	-0.0972865	-0.0649152	0.00663786	0.012801	-0.107389	-0.0365342	-0.0574652	0.0375105	0.000517362	-0.000517548	-0.218781	0.103379	-0.524511	0.0538477	-0.4943	0.267389	0.273777	-0.112541	-0.539106	-0.725829	0.370478	0.0198136	-0.587872	-0.0200895	0.208739	0.329877
FASN_P49327	0.0137082	-0.0586959	0.0101484	0.00288248	0.0441043	0.0408118	0.0695068	-0.00288825	-0.0276417	-0.0160484	0.077461	0.0456281	-0.0199306	-0.0535075	-0.0367883	-0.064912	0.0403282	-0.00148846	0.0565153	-0.019534	0.019585	0.00148693	0.0163957	0.0286786	0.0110478	-0.044782	0.0123368	-0.0088064	-0.0886563	-0.075034	-0.0388842	-0.0907417	0.076427	0.0366557	0.010381	0.0315496	0.0191113	0.10777	0.0335649	0.0328069	-0.0104563	-0.0437918	-0.0432708	-0.0590866	-0.0387704	-0.035457	-0.0780376	-0.0457228	0.0486263
POLD1_P28340	0.0074975	-0.0972392	0.0112083	-0.00156224	-0.0163262	-0.0415348	-0.0824418	-0.0272364	-0.0393669	0.0196142	-0.0652185	0.0168305	0.0315624	0.0112722	0.00156055	0.0329082	0.0524514	0.0745104	-0.050848	0.0517211	-0.0622493	-0.134301	0.0133657	0.0330083	-0.00524947	0.0285525	-0.164247	-0.177903	0.0771436	-0.00424052	-0.0142016	0.00422809	0.0173945	0.0163733	0.0448097	0.081701	0.0274635	0.0105574	-0.0258511	0.040171	-0.0472755	-0.0454148	-0.0252374	-0.0250899	0.00514445	-0.00516286	-0.128693	-0.112419	0.0249065
RSL1D1_O76021	-0.501115	-0.358075	-0.0959968	-0.238076	-0.156656	-0.44183	0.0741363	0.502141	0.0935062	0.0736036	-0.0333121	0.147158	-0.178507	0.157254	0.0325602	0.326445	-0.530102	-0.410508	-0.0681176	0.0430521	0.0348558	-0.0662456	-0.028765	-0.0242371	-0.185918	-0.164996	0.511153	0.670896	0.25544	0.0364645	0.0238366	0.285324	-0.412864	-0.324803	-0.325988	-0.528451	-0.272298	-0.426173	-0.0723246	0.18138	0.012802	0.221997	0.489872	0.422943	0.0745053	-0.0129167	0.588876	0.372693	-0.237667
COPB2_P35606	0.0391558	-0.0433191	0.0104116	0.0331319	0.0271191	0.0107373	0.00100483	-0.0547559	-0.0182615	-0.0245916	0.0156008	0.0231883	-0.00100553	-0.00977289	-0.0139246	-0.00529674	0.0736969	0.00970369	-0.0039603	-0.0197893	-0.0534784	0.0690851	-0.00103675	0.0245441	0.0458408	-0.023566	0.00103601	0.0146187	-0.0328879	-0.0359455	0.00180242	-0.0222442	-0.00345873	0.0273935	0.00822593	0.0252788	0.0414748	0.0819629	0.0170516	0.030795	-0.0146668	-0.0642316	0.00292016	-0.0547535	-0.0188584	-0.0360438	-0.0454304	-0.00292608	0.0498612
SLC16A1_P53985	0.141512	0.0329342	-0.0339691	-0.0287205	-0.058051	0.0973114	0.0939005	-0.000836135	0.0293607	-0.0113231	0.000835651	-0.0193172	0.073834	0.00236449	-0.0372847	-0.0857646	-0.0858358	0.00427039	-0.0309568	0.0134388	-0.0199979	0.0572858	0.0146771	-0.00402763	0.152857	0.00401641	0.140481	0.185887	-0.26181	-0.0756685	-0.005375	-0.0294648	-0.0250746	0.0178218	-0.0153181	0.00173211	0.0663556	-0.0253314	-0.00173419	-0.0608874	0.0151068	-0.0667007	-0.0168448	-0.0329489	0.0400402	0.0537019	0.0115048	0.0519965	0.069584
NOLC1_Q14978-2	-0.0763543	-0.0805312	-0.0385621	-0.0277082	-0.0522096	0.0153717	0.0944597	0.115746	0.0153034	0.0784018	0.0199237	0.0279614	-0.0723589	-0.105466	-0.00521525	0.00519647	-0.0144815	-0.0535444	0.0604308	0.0511723	-0.00518403	0.0235878	-0.0157853	-0.0471481	0.0504916	0.078429	-0.121675	-0.10285	0.00516547	-0.0519576	0.0498396	0.0435024	0.0185039	0.0762104	-0.0306435	0.00539733	-0.00541759	-0.0521463	0.0429501	-0.0135137	0.0548433	0.118769	-0.138152	-0.168896	0.115791	0.100155	-0.163552	-0.247641	0.0288876
NOLC1_Q14978-3																																	-0.168167	0.136385	-0.132931	0.101952	-0.00482864	0.0180875	0.00481253	-0.0312741	-0.385219	0.0265757	-0.456511	-0.153041	-0.223781	0.181026	0.137203	0.0286636
VPS13C_Q709C8	0.0484294	-0.0532749	0.0267731	0.0312585	0.0439281	0.0298669	-0.0777733	-0.151742	-0.0120415	-0.0173934	0.020355	0.0493262	0.0119418	-0.0599523	-0.0148298	-0.0121086	0.0371798	0.0366247	0.0264812	-0.0143972	0.00600727	-0.00603239	0.0295284	0.0523843	0.0398449	0.0105964	-0.0700088	-0.0598482	-0.0110797	-0.0236625	-0.0222486	-0.0688907	0.00663714	-0.0034532	-0.0272138	0.0532266	0.0883799	0.0456177	0.00380457	0.00344495	-0.0223244	-0.0477623	0.0312181	-0.00445254	0.0406076	-0.0290894	-0.0429354	-0.0108402	0.0461716
VPS13A_Q96RL7	0.00591824	-0.0758095	-0.0185684	0.00353081	0.00443836	-0.00480891	-0.0018178	-0.0886741	0.0189892	0.00569509	-0.0254872	0.0698382	0.00181551	-0.0489945	0.00907085	-0.0116618	-0.0734634	-0.0138068	0.0284695	-0.00896205	0.0810563	0.00668979	0.0598004	-0.00672096	0.107623	0.0425861	-0.030389	-0.0337899	-0.0401289	0.00996689	0.0392879	-0.00869712	-0.00112184	-0.0239458	-0.039368	0.00801921	0.0618188	0.0108028	-0.00578491	0.00775274	-0.0342523	-0.0199659	0.0488774	-0.042067	0.00305608	-0.00666643	0.0445437	0.00112097	0.00630579
VPS13A_Q96RL7-4
PALMD_Q9NP74	-0.0214394	0.0589182	-0.00575378	-0.0754741	0.0804103	-0.116341	-0.00566329	0.0433048	0.0245539	-0.0398043	0.126829	0.0784525	-0.0241092	0.0217722	0.00564114	-0.0376059	-0.022985	0.0150393	-0.0976783	0.079062	0.015515	-0.0578465	0.0369039	-0.0679671	-0.037963	0.104422	0.134885	-0.00132033	0.0323256	-0.0148824	-0.0444269	0.00131913	0.00287696	0.049597	-0.0202166	-0.00288271	0.0834794	-0.0396796	0.0776041	-0.100235	0.0252797	0.0245232	-0.0451231	-0.0561562	0.0340919	0.124802	-0.0805914	-0.148007	-0.014531
TM2D3_Q9BRN9	0.0823676	-0.00372676	-0.155826	0.0900529	0.0316208	-0.0127682	0.0504742	-0.0473017	-0.0693694	0.137035	-0.0142572	0.00371716	0.0793965	0.0708649	-0.0541318	-0.0207231	0.114626	0.0511917	0.0145134	0.043896	-0.0905222	-0.0638489	-0.227068	0.0115899	0.0604684	-0.165798	0.227779	-0.0534554	-0.0736499	0.0662969	-0.0240158	-0.0116837	-0.0229054	-0.163431	-0.259309	-0.00385881	0.061553	0.07012	-0.0651567	0.0823427	-0.0753455	-0.0141935	-0.0547824	0.0139986	0.00384851	0.0249942	0.206979	0.0404125	-0.0654251
RTF2_Q9BY42	0.0301589	0.030621	0.0557514	0.0887419	-0.105309	-0.00470936	-0.0542019	-0.0942531	-0.0287326	0.00469404	-0.0498871	0.00483858	-0.118059	-0.0739953	0.0203442	0.0868119	-0.138496	-0.00849953	-0.0633778	0.00844975	-0.0250552	-0.0993143	-0.0303044	0.028914	-0.260018	0.0425493	0.118781	0.202293	0.198469	0.0100005	0.0589303	-0.0349877	0.00636228	0.0758997	-0.127763	-0.0140013	-0.0406058	0.0217813	-0.011644	0.0711242	-0.00639047	0.0299143	-0.0984478	-0.0792277	0.0383783	0.0510542	-0.034654	0.0148331	0.00563446
ATP6V0A2_Q9Y487	-0.0989505	-0.221726	0.0360845	-0.0199417	0.00322697	-0.0769694	-0.0632971	-0.0196735	0.0222438	0.0565976	0.055006	0.00627263	-0.0032342	-0.0483201	0.0260227	0.00908552	-0.0647175	-0.0224648	-0.0601187	-0.082152	0.00423334	-0.0042458	0.00774156	0.00558173	0.00640206	0.0235743	-0.199294	-0.138408	0.0232596	-0.0350651	0.00449716	0.0514411	0.0239727	0.0383706	-0.0107267	-0.0267644	-0.0084266	-0.0795553	-0.0106316	0.031847	0.0506704	0.00445357	0.0488899	0.0909011	-0.016422	-0.0115638	0.0758486	-0.00446736	-0.151338
ATP6V0A1_Q93050-3	-0.0856123	-0.147964	0.0580328	-0.0453154	0.0514429	-0.0846734	-0.207762	-0.0316664	0.0539226	0.11832	0.0225433	-0.0384688	-0.00758102	0.00754139	0.11134	0.11902	-0.184257	-0.00133283	-0.249103	-0.318144	0.0235656	0.100909	0.164417	0.140931	0.0013316	-0.0384273	-0.136647	-0.137231	0.0912099	0.0967655	-0.111998	0.00392197	-0.0607196	-0.0041644	-0.00336275	-0.19048	-0.0891096	-0.051427	0.0220848	0.124683	0.0905676	0.177553	0.251061	0.198771	-0.0965819	-0.202138	0.115958	0.00335493	-0.161693
ATP6V0A1_Q93050	-0.0565923	-0.318783	-0.0161376	-0.173205	0.0927148	-0.257071	-0.0677357	-0.0889066	0.397675	0.293328	0.357047	0.0159591	0.112873	-0.0180059	0.330902	0.231748
TCIRG1_Q13488	-0.010745	-0.0714161	0.130271	-0.120622	-0.0138932	-0.272883	0.0552561	0.00531596	0.0275193	-0.00510435	0.09658	-0.0683352	0.00508635	-0.021332	0.0628061	0.0631938	0.0710393	-0.0365596	-0.0760756	-0.101114	0.263058	-0.260578	-0.154163	0.101502	-0.160559	0.0818893	0.145525	0.035656	0.246718	-0.311422	-0.0565393	0.235985	-0.348029	0.106938	-0.335481	-0.19044	-0.348729	-0.132984	-0.170918	0.306434	0.412358	0.522066	0.500425	0.465737	-0.0787452	-0.254448	0.21244	0.0746687	-0.0630464
NDUFAF4_Q9P032	0.0338354	-0.0977181	0.0173926	0.0177973	0.0345455	-0.0183994	-0.0938232	-0.161769	-0.00791523	-0.00148606	0.00148453	0.0374788	0.00708917	-0.0177912	0.0150696	-0.0087507	0.045951	0.00995762	0.0660528	0.0511393	0.0236831	-0.0428309	0.011481	-0.030809	0.00356099	0.0312776	-0.101305	-0.0828443	-0.031077	-0.0502334	-0.0288922	-0.0035698	0.0447848	0.0172881	0.0247036	0.102896	0.0548168	0.0321127	0.0490235	-0.0133997	-0.0470111	-0.0567357	-0.0575137	-0.0434758	-0.00663404	0.00660367	-0.0546001	-0.0403726	0.0280643
CNOT2_Q9NZN8	-0.0193526	-0.0760128	-0.000542926	0.0196194	0.0136791	0.000542721	-0.0181378	0.013741	-0.0274835	-0.0223281	0.0402154	0.0507753	0.0386816	-0.0121377	-0.00552096	0.0542863	-0.0342849	0.132307	0.0683889	0.011026	0.0406251	-0.00461268	0.0322559	-0.0327804	-0.0263844	-0.0286707	-0.0584638	0.00459798	-0.0338464	-0.055639	0.139419	0.0303872	0.0270833	0.00518396	-0.104457	-0.00520265	-0.0838176	0.0555564	-0.0391098	0.0674791	0.0442821	-0.0317744	0.0743725	0.017485	0.00826907	-0.0125323	-0.0910582	-0.0506867	0.0200167
COQ5_Q5HYK3	-0.0307759	0.0352619	-0.059383	-0.0399869	-0.00107021	-0.0152831	-0.0740322	-0.124793	-0.043106	0.0536944	0.013729	0.0541502	0.108442	0.0220748	0.00106942	0.0144238	0.0689202	-0.00464334	0.150183	0.0950242	0.0307026	-0.0150779	0.0091492	-0.123116	-0.0171412	0.113874	-0.118568	-0.185496	0.0399146	0.00462844	-0.0217593	-0.0586545	0.00621967	0.00116167	-0.0166251	0.115556	0.0770674	0.021843	-0.0212298	-0.000363576	-0.0178514	0.000363484	-0.0381277	0.0777849	-0.0351068	0.00242957	-0.0147561	-0.0397164	0.0286665
POLR1E_Q9GZS1-1																																																	0.0715196
OXCT1_P55809	-0.025215	-0.0853819	-0.0178687	0.0165996	0.0473439	0.0428825	0.00121035	-0.0578275	-0.0253302	-0.00121137	0.0639899	0.0562366	0.0121772	-0.0279595	0.0155965	-0.0182009	-8.78129e-05	-0.048274	0.0108201	0.00735267	-0.0185567	0.000750814	8.78076e-05	0.0219079	-0.0482	-0.0294634	0.107344	0.0980881	-0.055112	0.0150294	-0.0672702	-0.0701348	0.0726447	0.0245774	0.0158045	0.0394622	0.00835931	0.052351	0.0163049	0.0265162	-0.0417347	-0.039301	-0.0729978	-0.0535452	-0.00840802	-0.0537538	-0.0961629	-0.0229311	0.0255811
MARS_P56192	-0.0653098	-0.0986879	-0.0054246	-0.0230268	0.00529379	-0.0331781	-0.035459	0.0214478	0.0476633	0.0123137	0.0332137	0.012726	-0.00531329	0.0156109	-0.0395589	0.029085	0.0113719	-0.00107358	-0.0486156	-0.0813461	0.0634275	0.0798085	0.0445417	0.0305244	0.0404409	-0.00588618	-0.0510861	-0.0830411	0.00107278	-0.0670853	0.0238473	-0.0128742	-0.0144929	-0.0236256	-0.0453098	-0.029094	-0.0338119	-0.000567314	0.0256551	0.0541913	0.059267	0.0377515	0.118616	0.0645856	0.000567091	-0.0123521	0.0860014	-0.00202186	0.0279037
NUB1_Q9Y5A7	0.22378	-0.0150947	0.0987966	-0.0203175	0.0790927	0.0987489	0.0362754	0.0572835	-0.142012	-0.13498	-0.071816	0.0579512	-0.0336029	0.00954867	-0.173454	-0.00961229	0.112992	-0.0322987	0.134432	0.15058	0.146596	-0.0282453	0.0282044	-0.00116475	0.0424455	0.00116381	-0.165088	-0.117964	-0.0876878	-0.0562547	-0.0315883	0.0993423	-0.0354773	-0.0874162	0.0217658	-0.0772131	0.112033	-0.00139502	-0.0441851	0.122326	-0.0116291	-0.0066384	0.157887	0.29118	0.0939002	0.111282	-0.101065	0.00139367	0.00857758
TARBP2_Q15633	-0.0279646	-0.0631674	0.0713768	-0.0660075	0.00188183	-0.00188428	-0.0758549	0.1031	-0.119452	0.120429	0.0126672	0.109594	0.0429412	-0.091553	-0.0559994	0.0339789	-0.183904	0.0134445	0.0147287	0.00184157	-0.121905	-0.157793	-0.112975	0.0649931	-0.239091	-0.202051	-0.00184392	0.13829	0.101206	0.184046	-0.0323948	0.127471	-0.434132	-0.13852	-0.268435	-0.129146	0.0632051	-0.238503	-0.23984	-0.010708	-0.179542	0.0536093	0.232168	0.251552	0.0106291	0.0245801	0.118264	0.0498514	-0.150075
EHBP1L1_Q8N3D4	-0.00107667	-0.0267803	0.00107587	0.0302567	0.11543	0.0720151	0.0465099	0.340593	0.0344686	-0.0733692	-0.0133245	0.0654155	-0.0395472	-0.0692919	-0.0115417	-0.020699	0.0632048	-0.0565991	0.433581	9.39386e-05	0.00912747	0.0997215	-9.39447e-05	-0.0109865	-0.104337	-0.132879	0.0939043	0.107315	-0.152929	-0.259824	0.0655718	-0.174796	0.0563863	0.110698	0.0227222	-0.013417	0.000826681	0.130172	-0.024654	0.153823	0.0481721	-0.0532402	-0.000827155	0.0240231	-0.0793647	-0.0217406	-0.0446999	-0.0531127	0.18242
EHBP1_Q8NDI1																	-0.176142	0.0518197	0.0785891	0.0350779	0.0158745	-0.0842037	-0.230194	-0.0779463	-0.0124842	-0.0158681	0.0465965	-0.0169785	0.0175148	0.0123771	-0.0573615	0.0801402	-0.0946417	-0.0582884	-0.197488	0.0449257	-0.121288	-0.203862	-0.0620615	0.0215972	0.0412775	0.0407741	0.207805	0.108301	0.322292	0.136606	-0.0219254	-0.147499
ACTR1A_P61163	-0.0687601	-0.0780216	-0.024551	-0.0403975	0.00522487	-0.0399364	-0.00524386	-0.0524474	-0.0311092	0.0231352	0.0185306	0.0232398	0.0163291	0.00845483	0.0227439	0.0277432	0.0501677	0.0141998	0.0691368	-0.00508612	0.00802735	-0.067798	-0.081488	-0.0181092	0.0273599	-0.0707203	-0.0158031	0.00506825	-0.0343746	-0.0364616	0.0170534	0.0121796	-0.00113076	-0.00958976	-0.0242513	0.0307094	-0.0196584	0.0372295	-0.0178436	0.0276355	-0.00712072	0.0232273	0.0131339	0.037966	0.00226578	0.00112987	-0.0196771	-0.0304657	-0.00129385
ACTR1B_P42025	-0.0920408	-0.138997	0.0193166	0.0422596	0.0187501	-0.0848052	0.0196337	-0.143649	-0.0458654	0.00290961	-0.00291549	0.00727049	0.134838	-0.128119	-0.115845	0.0170652	-0.201337	0.219605	0.17691	0.0762634	0.488504	0.430012	-0.361889	-0.0805209	-0.491538	-0.463346	0.377006	0.235715	0.178702	-0.512003	-0.32141	-0.83992	-0.0350562	0.0171956	-0.0816248	0.0601481	0.184032	0.0251397	-0.0183422	-0.0327925	-0.017403	-0.0468339	0.0525567	0.0904938	-0.105079	0.0473423	0.0405271	-0.157382	-0.137592
HNRNPM_P52272	-0.223339	-0.0158838	0.129214	-0.0416744	0.0140551	-0.256885	-0.118386	0.399092	0.221202	0.0786807	-0.0141934	0.228602	-0.111659	0.119939	-0.109518	0.108324	-0.157561	-0.023778	-0.0979418	-0.0828922	0.0558743	0.0224247	-0.0692686	-0.0455478	-0.0734498	-0.0152102	0.0150515	0.127573	0.101731	0.130862	0.115529	0.271347	-0.0829009	-0.0406927	-0.167367	-0.274378	-0.241834	-0.246357	-0.113978	0.232981	0.0636745	0.189738	0.409013	0.302957	0.0395763	0.07283	0.193873	-0.1086	-0.0541301
GALNT12_Q8IXK2	-0.0710038	-0.0467808	-0.00857797	-0.0740023	0.141517	-0.0400454	0.0353936	-0.0180896	0.0666496	0.090522	0.142784	-0.120148	0.00852727	0.145739	0.113438	-0.238115	-0.0052586	0.042859	-0.0498543	-0.0295162	-0.0321922	-0.0139609	-0.017511	0.0617523	0.0120949	-0.0146716	-0.0523728	0.0994479	0.0889672	0.0052395	0.0413871	0.0597988	0.132399	-0.192017	0.0474537	-0.191305	0.0949063	0.0660522	0.0165271	-0.000358795	-0.00731078	-0.182201	0.0686881	0.000358706	0.0975739	-0.19126	-0.156196	-0.171183	0.0146992
GALNT4_Q8N4A0	-0.0157552	-0.10629	-0.0136699	0.036191	0.000193494	0.101093	-0.021774	-0.0621811	0.00413833	-0.00423109	0.051832	0.0369142	0.0234643	-0.00146125	0.0151815	-0.00019352	0.0978971	0.00717528	0.183905	0.160674	0.0797496	0.0303527	0.00234896	-0.0862748	-0.00235279	0.217654	-0.333465	-0.40013	-0.250429	-0.0556289	-0.0582793	-0.00325989	-0.020999	-0.0912234	0.043712	0.113753	0.0894669	0.0353832	-0.0346626	7.48667e-05	0.0474462	-0.079806	0.0400108	-0.00597305	-0.00477068	-7.48706e-05	0.0530704	-0.119014	0.148419
GALNT2_Q10471	0.0069758	-0.0751088	-0.00250895	0.0244447	0.0208384	0.0334799	-0.0296841	-0.0630623	-0.0332163	-0.0556391	0.015674	0.0287288	-0.000774358	-0.0381902	0.0147256	0.000773942	0.0544283	0.0679499	-0.00653862	-0.0134895	0.0622458	0.00345764	0.0244572	0.05783	0.0237276	-0.0171594	-0.0480502	-0.105324	-0.0025378	-0.0456202	0.00253335	-0.0711882	-0.00764537	0.0224646	-0.00413356	0.0688289	0.0421825	0.0727534	0.0410095	0.0452715	-0.0329865	-0.0335382	0.00224352	-0.0317023	-0.00581437	-0.00224701	-0.0289282	0.00395173	0.0212766
GALNT5_Q7Z7M9	0.0269823	-0.0617456	0.000149946	0.0401632	0.0265702	-0.000149962	-0.0133777	-0.0653016	-0.0197275	-0.0121884	0.00687915	-0.0197859	0.0145778	-0.0212812	0.020649	0.0230826	0.00561349	-0.0230289	0.00375319	0.0111205	-0.0554772	-0.086194	-0.0021702	-0.0696264	-0.0425033	-0.175846	0.0532492	0.0412016	0.0480214	0.0284036	-0.00533205	0.00216694	0.0360807	0.0275573	0.00465949	2.07627e-05	0.0170011	0.051367	-2.0763e-05	0.0137873	0.00540206	-0.0120628	-0.054037	-0.0420115	-0.0383442	-0.0505039	-0.0053691	-0.105062	0.0250009
NECAP2_Q9NVZ3	0.017675	-0.0285253	0.00839044	-0.000122429	0.0370465	0.0193511	0.0243883	-0.00654717	-0.00630123	0.000122418	0.0207362	-0.00567728	0.0106989	-0.0493034	-0.0280707	-0.034541	0.0633494	-0.00590804	0.112836	-0.0150264	0.0106014	0.00114178	0.08852	0.0159044	0.000280623	-0.000280677	0.0098927	-0.0446679	-0.030816	-0.084427	-0.0333928	-0.00164673	-0.0183878	0.00393067	0.0105429	0.0659259	0.0383427	-0.00394141	0.0283822	0.0296704	-0.0736242	-0.108805	-0.124103	-0.114756	0.0371276	-0.0653612	-0.0891701	0.0123327	0.059306
FLII_Q13045	0.020538	-0.0221077	0.021774	0.0300256	0.0279677	0.0243701	-0.0203309	-0.0408882	-0.0156578	-0.050932	0.000194016	0.0350707	0.00453178	-0.0385495	-0.0255974	-0.000194042	0.0260486	0.00493123	0.0624338	0.0333688	0.0239487	0.00965638	-0.0121303	0.0314874	-0.0740118	-0.0544022	-0.0146249	0.0456176	-0.00494814	-0.0382897	-0.0198706	-0.0316067	0.0523171	-0.00737113	-0.00174038	0.12334	-0.0213315	0.0104007	-0.0151559	0.0409001	-0.0997522	0.0446135	0.0420739	0.01791	0.00173829	-0.0464881	-0.0586625	-0.0166669	0.00724403
FLII_Q13045-2																																	0.131775	0.0876076	0.191572	0.272587	-0.169718	0.19172	0.283906	0.342945	0.0343964	-0.39619	-0.0352366	-0.0583181	-0.22878	-0.0476061	-0.119798	-0.297786
AQR_O60306																	0.00145688	-0.126085	-0.236124	0.00414495	-0.116196	0.120415	-0.0441843	-0.0488784	-0.114616	0.0618326	0.0444861	0.180848	0.0375743	-0.0505151	-0.00145835	0.0199091	-0.0703663	-0.0571708	-0.149181	-0.174527	-0.0674709	-0.0346346	0.0679867	0.0980596	-0.0898607	0.146185	0.260519	0.255828	0.115857	-0.0732334	0.117454	0.0338226	-0.0011425
RRP12_Q5JTH9	-0.0816911	0.00956168	0.00452763	-0.0411931	-0.0471116	0.098866	-0.0457867	0.0660914	0.0305205	0.0511769	0.00886129	0.0666053	-0.130988	-0.068309	-0.00454188	-0.0249894	-0.162268	-0.133469	0.0381343	0.026684	0.104414	0.0398655	-0.091077	0.0196643	-0.0330986	-0.205182	0.153422	0.168428	0.167434	-0.0199361	-0.0791261	-0.0343853	-0.154955	-0.114528	-0.129856	-0.142628	-0.0675504	-0.0687845	-0.193975	0.102523	0.0862903	0.12587	0.903413	0.719254	0.0324906	-0.0332392	0.284276	0.180902	-0.0389597
TRRAP_Q9Y4A5	-0.0164771	-0.102467	-0.0165795	0.00731789	0.000441916	-0.0410097	-0.0348085	-0.0648587	0.00374969	0.0135388	0.00612412	0.047151	0.0211946	-0.0478088	0.00385989	-0.000442052	-0.0607028	-0.0324957	-0.0308438	-0.0510927	-0.0149958	-0.0256839	0.0347605	0.00427194	0.0086125	0.0632196	0.0572164	0.081986	-0.0381504	-0.00428462	0.00705333	0.0134647	-0.0028204	-0.0142551	-0.0180613	0.0134704	0.038124	0.0207386	0.0028149	-0.035568	-0.02939	0.00794531	-0.0244811	-0.0153529	0.0284173	0.0109367	0.0132377	-0.00417727	-0.0285903
TIA1_P31483	0.058436	-0.0313973	-0.037646	0.0353173	0.0239444	-0.0545652	-0.0628059	-0.0727251	-0.0458524	0.015752	-0.0570137	-0.00755905	0.0320294	0.0316397	0.00751965	0.0281527	0.225482	-0.03874	0.0236095	-0.115186	0.0353692	-0.0189196	-0.0612367	0.203423	-0.0541083	-0.0549983	0.132835	0.0474733	0.0186747	0.0408667	-0.0740362	-0.0317477	0.0565764	0.0195993	0.0277813	0.0839298	0.0306548	0.0167975	-0.031389	-0.00350754	0.0855351	-0.0666783	-0.0462745	-0.0983698	-0.0110804	-0.0416444	-0.126296	0.00349903	0.0911788
TIAL1_Q01085-2	0.00838801	-0.0723265	-0.055291	0.0135082	0.00200664	-0.0394049	-0.0419211	-0.101766	0.00369137	-0.0310648	0.0172546	-0.00200944	0.0167573	0.00491896	0.00656797	-0.0535453	0.104796	-0.0588734	0.0325177	-0.0120544	0.0111839	0.0387545	-0.0630822	0.00784385	-0.00788673	0.0361698	-0.00840208	-0.0506605	-0.0611504	-0.0341006	0.0106086	0.0418684	0.0567197	0.0172718	-0.0117563	0.0304202	0.024439	0.0743241	-0.0271384	-0.00415539	-0.042278	0.00414345	-0.014302	-0.0139391	-0.0399471	-0.00807443	0.0152954	0.0572636	0.0931235
EMC2_Q15006	-0.0345753	-0.0977692	0.00954286	-0.00940219	0.0497772	-0.101685	-0.00785291	0.0303727	0.0238408	0.0089404	0.000590072	0.0367538	0.00508834	-0.0733433	-0.000590313	-0.00477555	0.0481571	0.00390934	-0.00303253	0.00738155	0.0335791	0.00302617	0.03243	0.0595728	-0.00974798	-0.0282325	0.0166206	-0.00497911	-0.0329823	-0.075307	-0.0110298	-0.0563932	0.0986016	0.060684	0.0428327	0.0725188	0.0589078	0.00709137	0.0228392	-0.0160833	-0.0106454	-0.0364243	-0.0514523	-0.00728859	0.0149822	-0.0071264	-0.0386912	-0.00921076	0.043024
YWHAE_P62258	0.0295626	-0.0968501	0.0164624	-0.00947109	-0.0167878	0.00024558	-0.00948269	-0.0723185	-0.00305999	-0.000245622	0.0326208	0.020947	0.0334232	-0.000277913	0.0347948	0.00546779	0.0413588	0.0184936	0.0114298	0.0156357	0.00884444	-0.0690961	-0.0514162	-0.0546963	0.0194518	-0.0194021	-0.0492073	-0.0367413	0.0128682	0.00968537	-0.0122	-0.008899	0.0138735	0.0206685	-0.00146743	0.00177461	0.0320694	-0.028309	0.010235	-0.0361666	-0.0291512	-0.0247833	-0.0384858	-0.0362707	0.0277009	0.0149055	0.00146594	-0.00238649	-0.0247633
SFN_P31947	0.145362	0.0447686	0.0302709	0.0102101	-0.0440639	0.103876	-0.00345049	0.0411792	-0.00014491	-0.083437	-0.0205467	-0.0426351	-0.0660205	-0.00725057	0.000144895	0.00724891	0.146253	0.620071	-0.00151242	0.00164747	-0.0684361	0.0495178	-0.035129	-0.0347798	0.0765092	-0.0362745	-0.112853	0.0105934	-0.116646	-0.0380611	0.00151083	0.0215527	0.0892873	0.0103114	0.00319938	0.0388091	0.0507348	0.033935	-0.00320649	-0.0488741	-0.014197	-0.0392839	-0.0470932	-0.0106449	-0.0365372	0.0032734	-0.042277	0.00838803	0.031342
YWHAB_P31946	0.0672789	-0.00743679	-0.0056356	0.0114354	-0.00426422	0.0799722	0.0116892	-0.0274914	0.0133388	-0.0755988	0.0414939	0.00425165	0.010294	-0.0362469	-0.0143126	-0.0335528	0.126909	0.0493672	-0.0698821	0.0732288	-0.206073	0.165202	0.00131077	-0.117983	0.138601	-0.00131197	-0.134456	0.0513413	-0.262785	-0.237105	0.0368543	-0.00848311	0.0699468	0.0172474	0.00318502	0.00753851	0.0406068	0.00827656	0.0103558	0.0200389	-0.00319207	-0.0582966	-0.0692255	-0.0601456	-0.0342277	-0.0262023	-0.0836456	-0.0367598	0.0258583
YWHAQ_P27348	0.00757523	-0.053386	0.00370185	0.00812043	0.0469787	-0.0234082	-0.0449699	-0.0247104	0.00399033	-0.0440726	0.00921253	-0.00371137	0.0325509	-0.0288381	0.0300948	-0.0915434	-0.0459244	-0.0777025	-0.197425	-0.0871446	0.0445075	0.735614	0.725864	0.661445	-0.0760861	0.631856	0.819132	0.350169	-0.0789758	-0.0634264	0.397953	-0.111249	0.261389	0.226854	0.218985	0.028568	-0.176884	0.193896	0.178448	0.21295	0.151175	-0.0455572	-0.383737	-0.220808	-0.136921	-0.0291451	-0.116493	-0.268264	-0.295948
YWHAZ_P63104	0.0924356	0.0330153	-0.000206837	-0.00325007	0.000206807	0.0159162	-0.0329871	-0.0108044	0.0450188	-0.0475974	-0.0104486	-0.013605	0.0215156	0.0168904	0.0193321	-0.0437908	0.0292469	-0.0429167	-0.070465	-0.00268887	-0.0285881	0.00268386	0.0257152	0.0332606	-0.105556	0.097603	0.0885638	-0.0184644	0.104004	0.0637052	-0.0350237	-0.0489839	0.114681	0.117295	0.101942	0.00226861	-0.0254295	0.0954056	0.118716	0.0948356	0.0818804	-0.022325	-0.216178	-0.140322	-0.0483758	-0.00227218	-0.0223534	-0.0893752	-0.202153
YWHAZ_E7ESK7	0.01156	-0.0116533	0.0516134	0.176026	-0.0848842	0.122353	-0.194434	-0.0674618	0.130048	0.129392	0.0432569	-0.0632154	-0.0534449	-0.281545	-0.159381	0.290882																	-0.00467157	-0.610857	0.0566912	0.147521	-0.0480534	0.0666325	-0.0511171	-0.0930313	0.0046565	-0.0449154	0.104367	0.254327	-0.00837752	0.111936	-0.0291005	0.0224432	0.272852
YWHAG_P61981	0.0286255	-0.0367935	0.00114729	0.00688277	0.0319099	-0.0861988	-0.0826132	-0.0241155	0.0515906	-0.0268645	-0.0461526	-0.0011482	0.0690712	0.00849559	0.0463737	-0.0281323	0.0532815	-0.0102012	0.00207279	0.0267736	-0.0069786	0.0352502	-0.0133796	-0.00207577	-0.0175612	0.0414935	0.0416443	-0.0156937	0.067129	0.0234865	-0.0106539	-0.0198115	-0.0286744	0.0586815	-0.0655628	0.00209014	-0.038873	-0.0336568	0.0172459	0.0257557	0.0515895	0.0158811	-0.0644966	-0.0515619	-0.0185639	0.0154045	0.0535504	-0.00209317	-0.118124
YWHAH_Q04917	0.0710229	-0.0519515	0.000511602	0.0364999	0.024442	0.0390968	-0.0149883	-0.070724	-0.0152941	-0.000955554	0.0158719	0.0152983	0.00283981	-0.000511784	-0.0157915	-0.0133529	0.11025	-0.0383343	-0.00333158	-0.0155603	-0.0774676	0.0771894	-0.000192908	0.0566816	0.0187114	0.0705368	0.0111734	0.000192883	-0.0643065	-0.00229231	0.0144592	-0.0251735	0.0233582	0.0388382	-0.028876	0.0026346	-0.0352488	0.00559926	-0.00263942	0.0441871	0.0221848	-0.0476019	-0.033361	-0.0536097	-0.0130405	0.0441266	-0.00481192	0.0212131	0.0416049
LRSAM1_Q6UWE0	-0.0494963	-0.105787	0.274626	-0.010024	0.0658543	-0.0264249	-0.00229267	-0.0700626	0.0707742	-0.0547776	0.0251722	0.141046	0.00228903	-0.0668815	0.0687761	0.044863	0.142591	0.00911722	0.091218	-0.000446473	0.100492	-0.0203978	-0.0144738	0.0596287	0.0386134	0.0222163	-0.138844	-0.204349	-0.0904953	0.000446335	-0.0369012	-0.0671654	0.104555	0.0381191	0.0189049	0.0917269	0.0675471	0.00897966	-0.0159193	0.0238147	-0.0858823	-0.030148	-0.0814377	0.001115	-0.0070663	-0.00111586	-0.0929488	-0.0817112	0.047755
LMAN1_P49257	0.0124472	0.0122692	0.0231107	-0.00419458	0.00746013	-0.0293232	-0.0791958	-0.112352	-0.0271992	-0.00241846	0.0378066	0.0142166	0.00241442	-0.0503407	-0.0052128	0.0097821	0.0112055	0.0625692	-0.0627767	-0.014293	0.0258304	-0.00251298	0.00895211	0.00250861	-0.0282385	0.00601931	-0.125065	-0.128226	0.0140366	-0.00480635	-0.0234565	0.0216355	0.0248682	0.00663682	-0.0565345	-0.0100354	-0.00694727	-8.05482e-06	-0.00692184	-0.0184513	8.05477e-06	0.00189853	0.010944	0.0117317	0.00351795	-0.00889338	-0.0128701	0.00828526	0.0180536
MYDGF_Q969H8	0.00813385	-0.0987069	-0.0389077	0.00704403	-0.0528818	-0.0166271	-0.0405697	-0.155409	-0.0366986	0.0416711	-0.00707859	0.0238343	0.00874838	0.014409	0.0549226	0.0340727	0.00423307	-0.0196926	-0.00283051	0.00282496	-0.0263131	-0.0553231	-0.0259796	-0.0544462	0.0222783	0.00515496	0.0938358	0.0494759	-0.0339225	0.117856	0.0190474	-0.00959677	-0.0930006	0.0256141	-0.0619181	-0.0151952	0.0119223	0.00632315	0.000720591	-0.0849982	0.000669874	-0.0261945	-0.0504387	-0.0984599	-0.000670185	0.0632116	0.0429679	0.00859477	-0.0287663
LRBA_P50851	0.0460187	-0.0374033	0.0248503	0.0506631	0.055667	0.0393577	-0.0185116	-0.0747542	-0.0126839	-0.00731925	0.0527644	0.0482381	0.0072823	-0.0472567	-0.01452	-0.0172505	0.0881531	0.0299906	-0.0140561	-0.0165808	0.0602043	0.0378794	0.0518263	0.0538128	0.0619522	0.0139205	-0.109304	-0.168063	-0.101601	-0.0858208	-0.0487288	-0.0989233	0.0715606	0.024109	0.0380656	0.0549812	0.0389735	0.0613146	-0.00255901	0.00599318	-0.0195136	-0.0583197	0.00255448	-0.0132566	-0.00791755	-0.0381938	-0.0859821	-0.0226769	0.0346183
LRBA_A0A494BZW2	0.00535394	-0.108082	-0.0528761	0.104949	-0.0281887	0.0510959	0.0314251	-0.113052	-0.0363948	-0.00537388	-0.00675336	0.127781	0.0240283	0.0112088	0.0341356	-0.0301318	0.286721	-0.0415938	0.0392203	0.150423	-0.0385642	-0.0249479	0.0304716	0.0571102	0.23331	0.0245238	-0.0823854	-0.148528	0.194669	-0.113193	-0.0325003	-0.0455858	0.0970486	-0.0182474	-0.176567	0.0253947	0.095406	0.00154544	-0.137892	-0.116516	-0.0152547	-0.0628154	-0.0015471	0.209754	0.00435195	0.023176	-0.0547613	0.0845805	0.066309
CPT1A_P50416	-0.00447708	-0.0338326	0.00442805	0.0148303	-0.00444168	0.0550506	0.17877	0.164115	-0.0698699	-0.0211737	-0.0895517	-0.102118	-0.0817224	0.0343697	0.0405478	0.150138	-0.0755398	-0.0988378	0.271606	0.241904	-0.00511325	-0.0289216	0.00509519	0.00688287	-0.0874867	-0.165674	0.337471	0.328111	0.226371	0.196478	-0.0281465	-0.100161	-0.0311376	-0.162209	-0.0435209	-0.00459273	0.0171129	0.00457815	0.076988	0.15957	-0.0401641	-0.0750378	0.0508095	0.0425914	-0.106922	-0.128741	0.571584	0.585135	-0.0691835
DFFA_O00273	0.00636717	-0.0143348	-0.000447471	0.0158758	0.000721659	0.0227479	-0.00885988	-0.0326464	-0.00841907	-0.0151876	-0.00407619	0.0511561	0.0111854	0.000447333	0.0119541	-0.0510501	0.0235468	-0.043496	0.0382285	-0.0127471	-0.0264298	0.0109382	0.0189905	-0.00707891	0.00704435	0.058919	-0.0211616	-0.0816198	-0.076645	0.0282696	0.0214829	-0.0554842	0.0715712	0.00211323	0.0223846	0.0294903	0.047606	-0.0143278	0.0222075	-0.00211633	-0.015705	0.0128435	-0.072645	-0.0657615	-0.00939599	0.0286337	-0.059038	-0.0233819	-0.0486258
DFFA_O00273-2	-0.0200176	0.0878818	-0.0325986	-0.0767874	0.15626	-0.0323925	0.0243229	-0.139618	0.0603561	0.03368	-0.056343	-0.00276979	0.00276448	-0.0677553	0.0602983	0.0346502																																	-0.366061
KRT87P_A6NCN2	-0.176699	-0.0947679	-0.143551	0.300258	-0.103176	2.41135	-0.171162	2.66723	-0.251834	-0.00785744	0.28036	-0.171979	0.12864	0.33364	0.0659114	0.00781488
GAR1_Q9NY12	-0.203699	-0.238794	-0.0530614	-0.104353	-0.0219526	-0.166514	0.0395934	0.272951	0.145807	0.066885	0.0157954	0.0232361	-0.0931985	0.103501	-0.0159702	0.10899	-0.403038	-0.193202	-0.146534	-0.0353337	0.000637715	0.00727375	-0.000637997	-0.0765695	-0.0359707	-0.106586	0.214592	0.269917	0.128865	0.104706	0.106009	0.335901	-0.150019	-0.107021	-0.101827	-0.167809	-0.128808	-0.149234	-0.0397437	0.100735	0.0184125	0.198632	0.304006	0.236506	-0.00702884	0.00699476	0.262441	0.163465	-0.188041
DES_P17661	-0.210457	-0.152099	0.017631	-0.034328	-0.0178491	-0.0275073	-0.146753	-0.117392	0.0476348	0.115353	-0.0314645	0.109859	0.159472	0.113494	0.148535	0.179088	0.00414126	0.169232	0.119843	-0.00415318	-0.00680618	-0.093471	-0.0106506	-0.144996	-0.0409487	-0.232593	-0.0181721	0.0161788	0.165418	0.286341	0.10811	0.183688	-0.076341	-0.0815947	-0.0426314	0.242666	0.342388	0.32637	-0.0755826	0.0438245	-0.214402	-0.115211	0.135281	-0.0156912	0.00373951	-0.00374923	0.250078	0.12922	-0.100642
VIM_P08670	-0.165297	-0.0651382	-0.0527472	-0.0338682	-0.0500875	-0.147824	-0.14469	0.00885616	0.122688	0.166188	-0.00891086	0.17754	0.179435	0.221143	0.165802	0.33678	-0.239135	0.25023	-0.0355477	-0.147414	-0.137681	-0.0675466	0.0671445	-0.0742389	-0.0310919	-0.153634	0.194714	0.28989	0.0304359	0.326801	0.37989	0.533903	-0.122998	-0.00817372	-0.205832	-0.349576	-0.228244	-0.235119	-0.00422651	0.32471	0.259611	0.207914	0.178652	0.197974	0.137273	0.00421416	0.237815	-0.0262109	-0.271798
GFAP_P14136-2																	0.634646	-0.581854	0.279803	-0.0143384	0.154326	0.622869	0.132464	-0.710644	0.0141973	-0.237717	0.620511	-0.444158	0.385159	-0.79537	-0.808753	-0.787001
NEFH_P12036	-0.171796	-0.0974458	-0.0819267	-0.0927801	-0.0554594	-0.204713	-0.244849	0.0115967	0.130133	0.191587	-0.0116907	0.198625	0.181959	0.256238	0.145626	0.346667	-0.254275	0.238343	-0.0787716	-0.0562076	-0.0959862	-0.042951	0.00572643	-0.018947	0.0707684	-0.240714	-0.00574925	0.201511	0.0144486	0.296974	0.377082	0.454399	-0.20953	-0.112542	-0.285893	-0.547386	-0.283748	-0.249833	-0.0945671	0.227268	0.170549	0.192922	0.212797	0.110043	0.106045	0.0352167	0.2457	-0.0360979	-0.253759
PRPH_P41219-2	-0.149973	0.00662142	-0.0560122	-0.0138511	-0.138941	-0.221436	-0.237495	-0.104482	0.122277	0.110031	-0.00665195	0.200378	0.189085	0.153403	0.0927733	0.301494	-0.21841	0.0116231	-0.0853889	-0.11886	-0.159088	-0.0146466	0.0130609	-0.0117176	-0.131243	-0.117553	0.16602	0.264812	0.157265	0.104302	0.226502	0.350534	-0.0993443	0.0420839	-0.247804	-0.304227	-0.10671	-0.0805919	-0.0433485	0.130277	0.342536	0.103288	0.0984242	0.0544515	0.12875	-0.0544609	0.286102	-0.0592369	-0.314028
SRRM2_Q9UQ35	-0.00757459	-0.0225255	-0.0515446	-0.0297555	0.0901988	0.0021061	0.0866498	0.049992	0.0574966	0.0842717	-0.000108763	0.0282811	0.000108755	-0.0297181	-0.00320336	-0.00624711	0.0100577	-0.0371524	0.141413	0.0935707	0.241508	0.210386	0.0578541	0.030844	-0.0101283	0.0708482	-0.210697	-0.233058	-0.0926975	-0.167878	-0.118244	-0.0252619	-0.0111247	0.0221262	0.00351721	0.092375	0.0100895	-0.0394001	-0.0351427	0.134899	-0.0035258	0.028574	-0.257516	-0.251592	0.0158419	0.0590238	-0.411641	-0.411538	0.150477
SDHA_P31040	-0.0709908	-0.137805	-0.0847216	-0.0187754	-0.000774279	0.0100028	0.000773864	-0.0596111	-0.0288277	0.0344418	0.00563096	0.0302247	0.0286063	0.00590861	0.0690384	-0.0339698	-0.0248295	-0.0116569	-0.0598548	0.0402505	0.0186422	-0.0392144	0.0219587	0.0127993	-0.00991608	0.0577955	0.0296527	0.00263657	0.0401632	-0.0026414	-0.0369626	-0.0204276	-0.000323718	0.0215752	-0.00930382	0.00806943	0.02329	-0.00316541	0.000323645	-0.0669949	0.00212138	-0.0119449	-0.0516892	-0.102956	-0.0147724	0.0354773	0.0185717	0.0579859	-0.0128383
SLC25A19_Q9HC21	0.00118836	-0.115192	-0.0553546	-0.00118934	-0.00713222	0.0238102	-0.019141	-0.091632	-0.0354795	0.0471266	0.00489022	0.0547965	0.0257934	-0.00758931	0.0410299	0.0108389	0.00152969	-0.046733	-0.0724748	-0.0893953	0.0448034	-0.0255861	0.025705	-0.028823	-0.0525795	0.00941765	0.0999464	0.00625384	0.0676688	-0.00153131	0.0469032	-0.0800144	-0.0231221	0.00880632	-0.00922278	0.0685485	0.0477175	-0.0695152	0.0145195	-0.115508	-0.0475856	0.0220437	-0.0460857	-0.0358332	0.00512831	0.0562081	0.00343203	-0.00344021	-0.0608172
PDCD10_Q9BUL8	0.0386352	-0.110519	0.00736748	0.0162201	0.0375582	0.0328321	0.0295177	-0.0595519	-0.0240822	-0.0325194	0.0201696	0.0523443	-0.0696908	-0.112072	-0.0074053	-0.0282934	0.17692	0.128789	0.0622892	0.0342603	0.0545101	-0.0345415	-0.0644378	0.046044	0.00278849	-0.00373601	-0.00883136	-0.197374	-0.00279389	-0.0177533	0.0188024	-0.0663302	0.0655755	0.00534322	0.0262964	0.0100297	-0.0268903	0.0796318	0.027895	-0.00256768	-0.00453083	-0.0422453	-0.0486721	-0.0585018	-0.0493919	-0.00674661	0.00256312	0.0146895	0.054377
SPEN_Q96T58	-0.120089	0.0568471	-0.0603908	0.0128683	0.0805208	-0.0153435	-0.048345	-0.0609897	-0.00539926	0.00537913	0.0391876	-0.187873	0.0596246	0.0126159	0.0568805	-0.0159591	-0.0058537	0.0803577	-0.077102	-0.0140979	-0.025061	-0.0396546	0.0188901	-0.0271145	0.00768756	0.00583004	0.0333633	0.0503627	0.106573	-0.00772874	-0.0113625	0.0487385	0.111914	-0.064575	0.108546	0.131807	-0.114772	-0.0164895	-0.0975213	0.0324988	0.00680749	-0.15197	-0.0585172	0.133368	0.0729431	-0.00683977	-0.175045	0.0494725	0.104963
VPS51_Q9UID3	-0.0592845	-0.0816922	0.0841833	0.0340349	0.00592337	0.0268288	-0.0288502	0.0474378	-0.0266818	-0.0142706	0.0535949	0.0168238	-0.00594779	-0.0230572	-0.124146	0.0293699	0.0863475	0.031357	-0.0234132	0.0492848	-0.00482841	-0.065897	0.0185744	0.0601876	0.0267194	-0.0853176	-0.207212	-0.0621846	0.0048123	-0.0854735	-0.00897829	0.0145891	0.050503	-0.0144342	0.00474133	-0.1557	0.046952	0.00443908	-0.0464094	0.0256434	-0.0938135	0.00350217	0.0412219	0.0595265	-0.082727	-0.00542546	-0.0035107	-0.222807	0.00897641
CAMSAP1_Q5T5Y3-3	-0.0233954	0.0631913	0.125536	0.0277453	0.0633197	-0.0846039	-0.139811	0.101945	0.0059429	0.0138976	0.0199968	-0.00596748	-0.0660211	-0.0713075	-0.047689	-0.0731428	0.161681	0.277116	0.104761	0.130643	0.0123704	-0.16906	-0.165868	0.0660313	0.0920055	-0.156496	-0.357213	-0.150911	-0.0651415	-0.0124774	-0.180856	0.175528	0.0248391	-0.0667474	-0.0386262	0.220352	0.0220523	0.143602	-0.0868589	0.177234	-0.0231863	-0.0393959	0.000794033	0.0803295	0.0435135	-0.00282716	-0.00079447	-0.053657	-0.121186
AARS2_Q5JTZ9	0.0659517	-0.001377	0.0596722	0.0572569	0.0428897	0.0656213	-0.0472618	-0.093436	-0.0165741	-0.0378873	0.0203375	0.00137569	0.0137165	-0.0640465	-0.0598614	-0.0349862	0.214383	0.130218	0.124174	-0.0043419	0.0734765	-0.0439365	0.0182663	0.00432887	0.112246	0.0456363	-0.269195	-0.354254	-0.0724253	-0.0439484	-0.0244535	-0.0765328	0.108213	-0.000628368	0.00527326	0.0977852	0.0643199	0.097755	0.000628095	0.0564424	-0.0315123	-0.0756895	-0.0223564	-0.0377915	0.00140448	-0.0329999	-0.130285	-0.0692653	0.136756
XPO7_E7ESC6	0.0447276	-0.0481267	0.00929275	0.0306997	-0.0015759	0.0106231	-0.0591033	-0.148784	-0.0215502	-0.00647206	0.00157418	0.0198988	0.0206578	-0.0277158	0.0134713	-0.00654361	0.0713411	0.0800423	0.0197368	0.027102	-0.00157245	0.00157074	0.0206929	0.042843	0.0399338	-0.0139705	-0.0145483	-0.0351398	-0.0976932	-0.0656398	-0.00521591	-0.0144996	0.0942723	0.0469055	0.0262246	0.0500559	0.00842841	0.0861936	0.00832333	0.00907471	-0.0124239	-0.0293598	-0.0775023	-0.094373	-0.0196844	-0.00837163	-0.0710603	-0.0950992	0.0350287
RANBP17_Q9H2T7	0.0994613	0.0337564	-0.0757026	0.234082	0.129812	0.127777	-0.0615973	-0.0568789	-0.102532	0.0179822	-0.0182092	-0.11098	0.097385	0.0643913	-0.0238326	-0.0394975	0.227857	-0.00751612	-0.245044	0.0503546	0.081222	-0.04264	0.12082	0.159011	0.026999	0.00747717	-0.15035	-0.298326	-0.158679	0.117156	-0.0502498	-0.16839	0.199738	0.463973	-0.435686	0.248219	0.176705	0.087981	-0.0649005	0.343	0.38545	0.0621061	-0.164824	-0.378011	-0.348899	-0.159074	-0.176439	-0.246507	0.0775572
GAPDH_P04406	0.117663	0.00484186	0.0420006	-0.00531795	0.00465274	-0.00879889	0.0358608	-0.0125613	0.0289669	-0.0941077	-0.0046678	-0.0349081	0.0851685	-0.0427571	0.0732863	-0.0107162	0.023213	-0.047855	-0.0457277	-0.0370052	-0.000814733	-0.00315502	0.0262337	0.0300823	-0.0814606	0.109154	0.0798495	-0.0345359	0.0869495	0.0187637	0.000814274	-0.0605715	0.100066	0.097568	0.11846	0.0179504	-0.0165442	0.0565072	0.0914674	0.00898472	0.0289057	-0.0163617	-0.224997	-0.0873585	-0.00904103	-0.0120292	-0.0352874	-0.108417	-0.0681991
GAPDH_P04406-2
ANO6_Q4KMQ2-2	0.0396924	-0.0513069	-0.0321497	0.00362352	0.0316678	0.0765567	0.0250281	-0.0188562	-0.00322085	-0.0088689	0.0288632	-0.00851133	0.0869351	0.00216322	-0.00216647	-0.0276821	0.0584894	0.0457744	-0.0611178	0.0644057	0.0716249	0.0128246	-0.0129396	0.0411769	0.0883718	0.0790791	-0.239462	-0.145405	-0.111624	-0.131289	-0.0815377	-0.0202517	0.0384479	-0.0326784	0.0314895	0.0789098	-0.0130805	0.0433319	0.0428615	0.0682818	0.0121828	-0.0673034	-0.167826	-0.157846	-0.0122865	0.0396071	-0.0386921	-0.0161346	-0.0201697
SCAF4_O95104	0.0461387	-0.161289	-0.0757027	0.132604	0.0191482	0.00955878	-0.196491	-0.0463255	-0.0154999	-0.0179021	0.0799077	0.00995607	-0.00962253	0.0171253	-0.078156	0.0453458	0.159738	-0.105169	0.0745834	0.0773099	0.10891	-0.0520873	-0.0840516	0.0686299	-0.0568294	0.00367499	-0.148563	-0.148607	-0.00368438	-0.0394836	0.0237895	0.059824	-0.148216	-0.0338404	-0.174724	-0.0774728	0.187113	0.0316721	-0.0256527	-0.00587771	-0.132298	0.00585386	0.0430025	0.0807497	0.0570409	-0.14743	0.0612685	0.0255203	-0.0818341
SCAF8_Q9UPN6-2	0.0612174	-0.0572959	0.0716501	0.0624682	0.0923287	0.0894395	0.0114177	-0.0590803	0.0122527	-0.00352311	0.00351453	-0.0601957	-0.026763	-0.0872264	-0.0112646	-0.133165	-0.165668	0.0593757	-0.101021	-0.00936772	0.0707313	0.261472	0.0525193	-0.0143331	-0.00530122	0.285598	0.109121	-0.0791638	-0.09907	-0.0972281	0.137492	0.00528181	-0.0119076	-0.0308469	0.0647912	0.0624428	0.0924964	0.105916	0.0318853	0.0118101	-0.0387511	-0.0350004	0.0195497	-0.0556923	-0.012552	0.0361298	-0.273471	-0.0601897	0.16752
AKAP1_Q92667	-0.0125699	-0.0786615	0.0420941	-0.059045	0.00635134	-0.00338462	0.0350106	0.00760951	0.00056256	-0.0151977	-0.000562779	0.0500938	-0.0624455	-0.00479412	0.0352524	0.00917723	-0.051962	-0.0360631	-0.012466	0.0394413	0.0410266	0.00788703	0.0789372	0.0415689	-0.00793039	-0.0371104	-0.0313321	0.0828997	0.0437945	-0.0481575	-0.0205159	0.101623	-0.00062764	-0.155657	-0.0123341	0.000627367	-0.00578648	-0.00354941	0.0204714	0.144352	-0.031293	0.132919	0.299838	0.231545	0.0638031	-0.0572659	0.0650011	-0.0116126	-0.0815718
IGSF3_O75054	0.00342582	-0.0289078	0.0595843	-0.00455227	0.0578574	0.00249032	-0.00249463	-0.119031	-0.0306426	-0.0347972	-0.00398028	0.0158567	0.110996	0.0070331	0.0233801	-0.0108313	0.0764078	0.0174795	0.150454	0.00596198	-0.00598672	-0.0673557	-0.11401	-0.0101521	0.0862784	-0.0892238	0.0583364	0.223451	-0.0438157	-0.0476648	0.0418357	-0.0352135	0.0529469	0.0559063	-0.0286747	-0.0306191	0.0946945	0.0128117	0.0245632	-0.0197312	-0.0192164	-0.0141011	-0.00513376	-0.0384775	0.0693789	0.0187837	-0.0345394	0.00511555	-1.03902e-05
COMMD3_Q9UBI1	-0.129207	0.0573862	0.0757792	0.101753	0.0111257	0.0740605	-0.0632746	0.0558232	-0.256831	-0.112698	0.0810953	0.123294	-0.117983	-0.0543589	-0.0112122	-0.0314851																	0.0479023	0.215039	-0.00851998	0.120086	-0.0499133	-0.0060693	0.111472	0.195373	-0.583413	-0.0865028	0.00604388	-0.0446522	0.0810626	0.0417243	-0.27155	-0.0448094	0.00679442
COMMD3-BMI1_R4GMX3																	-0.00880541	0.080287	0.127162	0.143445	0.0659224	0.151368	-0.0648086	0.00153708	0.316995	-0.105242	-0.177549	-0.0328115	-0.00153872	-0.0199734	-0.0435967	0.0562792	-0.123443	0.0371864	0.0874931	0.195008	-0.0538858	-0.174944	-0.150989	-0.0886294	-0.216861	0.11331	-0.102445	0.140999	0.243625	0.0639261	-0.0381703	0.138224
PCGF2_P35227	0.0440688	0.330252	0.106139	0.120554	0.0485108	0.00821175	-0.0136192	0.0428329	-0.0517684	-0.113743	-0.0615387	0.0162772	-0.158855	-0.0438087	-0.0839334	-0.00825876	0.346381	0.214621	0.0682359	-0.108271	-0.157313	0.0390329	-0.0806542	0.00996165	-0.19237	-0.0100309	-0.28694	-0.277407	0.213039	0.029249	-0.102792	0.0618664	0.00730716	-0.0292268	-0.0502085	0.057481	0.153225	0.113254	0.119615	-0.0593879	0.0532276	-0.0138277	0.15812	0.0156164	-0.0916781	-0.00734435	-0.105802	-0.0418465	0.0907614
DDX42_Q86XP3	0.040003	0.0187275	0.0485918	0.163624	0.173872	0.211117	-0.13166	0.349127	-0.183999	-0.297951	-0.094433	6.10231e-05	-0.0601289	-6.10256e-05	-0.240474	-0.220761	0.202423	0.0416528	0.018316	0.115836	0.152268	0.156964	-0.0396235	0.119529	-0.0776382	-0.0532645	-0.0565753	-0.0185516	-0.11587	-0.145544	-0.0623393	0.0187071	0.0838532	-0.106764	-0.0753751	-0.121441	-0.131963	0.190163	0.0747073	0.013134	-0.124149	-0.00925118	0.035395	0.0276446	-0.243693	0.149757	0.00919224	-0.263012	0.118977
IK_Q13123	-0.0201649	-0.0643372	-0.0033539	0.0982245	0.00334612	0.0369303	-0.0762768	0.101914	0.0283337	0.0966258	-0.0841351	0.0403105	-0.0917446	-0.0412997	-0.0269043	0.072695	-0.000299408	0.0198171	-0.0463655	-0.0232641	0.0226574	0.0287899	0.000299346	-0.0197519	-0.0805907	-0.118288	-0.0615287	-0.00857742	0.0388914	0.0043171	0.0611776	0.0774548	0.0246151	-0.336687	0.242491	-0.255804	0.198298	-0.331856	-0.0946262	0.108602	-0.16043	0.00932591	0.0638899	0.307653	-0.0718354	-0.0181071	-0.00938659	0.225735	-0.0112448
FAT3_Q8TDW7-1	-0.465622	-0.0397841	-0.152168	-0.0386997	-0.0448934	0.0591742	0.0376887	-0.130273	0.237489	0.55795	-0.118276	-0.0902371	0.352223	0.638121	0.424812	0.11575																																	-0.19048
TMEM208_Q9BTX3	0.0528145	0.0420477	-0.0599385	0.0353794	0.0133404	0.148714	-0.0903642	-0.171076	0.0123222	0.0568168	0.0336007	-0.0124284	-0.105251	-0.073861	-0.0771689	-0.12434	-0.241391	-0.109336	-0.0304787	-0.309582	0.231261	0.143353	0.225882	-0.0315824	0.244172	-0.0547559	-0.174517	0.246771	0.142185	0.0298481	-0.118501	0.0740521	0.18533	0.00866614	-0.0951365	0.0474802	0.103622	-0.0639054	-0.105338	-0.117382	0.011164	-0.146888	-0.0582157	0.0509727	0.0305733	0.0305169	-0.0701374	-0.00871851	0.213524
CCDC124_Q96CT7	-0.0667202	-0.155985	-0.0403167	-0.0845826	-0.0465569	-0.00234677	0.0277836	0.0774054	0.0311607	0.0179103	0.0145408	0.00234295	-0.0281148	-0.00799927	0.0045117	0.0365945	-0.0314377	-0.0517222	0.00432054	-0.0179296	-0.0122381	0.0073416	-0.0226951	-0.0292813	-0.00433352	0.039868	0.0837541	0.0759596	-0.0193688	0.082151	0.0552601	0.0605044	0.00765646	-0.0269068	-0.02546	-0.0656923	-0.0259068	-0.0688873	-0.00323329	-0.0541595	0.0147215	0.0614722	0.0526742	0.0517607	-0.0054972	0.00322606	0.0789722	0.0543081	-0.0281937
HUWE1_Q7Z6Z7	-0.0150272	-0.0833943	0.0189875	0.00409452	0.0538241	0.00159888	0.0199388	-0.00784248	0.00323167	-0.0220019	-0.00160065	0.0131681	0.00346411	-0.0305295	-0.0448145	-0.0198955	0.0382294	0.00458554	0.016213	-0.0774224	0.0281616	0.0323023	0.0159142	0.0406266	0.0196669	-0.0417636	-0.0324852	-0.0410205	-0.0783208	-0.0904002	-0.00460017	-0.0448704	0.024195	0.0189932	-0.0120781	0.00852148	-0.000759137	0.0448033	0.0289373	0.045816	-0.00190437	-0.0396209	-0.0164836	0.00158621	0.000758738	-0.0388221	-0.0633981	-0.0254715	0.0589109
HUWE1_Q7Z6Z7-2																																	-0.177347	0.0932898	-0.309261	0.336226	0.124416	0.103236	-0.00383499	0.025899	0.00382482	-0.338694	-0.2929	-0.379753	0.12522	0.327506	-0.474746	-0.030307	0.0551052
HUWE1_A0A087X1S3	-0.0892867	0.0744656	-0.123604	0.00702958	0.0733635	-0.0712176	0.0777756	-0.0192267	-0.186303	0.206222	0.138883	0.0372037	0.024891	-0.0873253	-0.007064	-0.282554	0.0290152	0.0401606	-0.130616	-0.0673871	-0.0526542	-0.0859318	0.0579779	0.112514	0.175367	0.037516	-0.0530848	-0.103196	0.026144	-0.0266265	0.148139	-0.125786	-0.127007	0.14801	-0.2867	0.128803	-0.0121414	-0.00381149	0.111831	-0.048875	0.128729	-0.0620252	0.12015	-0.226177	0.185674	0.056393	-0.0307435	0.00380145	0.201601
MRTO4_Q9UKD2	-0.235811	-0.191638	0.0569074	-0.020383	0.0546981	-0.18338	0.0200991	0.489989	0.127093	-0.0388249	-0.0464152	0.0612691	-0.15514	0.0729864	-0.0911071	0.137142	-0.37778	-0.125787	-0.010079	-0.0485475	0.00805434	0.102325	-0.0574705	-0.00809956	-0.138028	-0.197639	0.0788062	0.377796	0.299228	0.182911	0.156744	0.261899	-0.0607547	0.0138417	-0.0312968	-0.283365	-0.374216	-0.118773	0.0217668	0.416708	0.107385	0.286251	-0.0664855	0.118218	0.0322482	-0.0139758	0.256619	-0.243124	-0.226786
SRM_P19623	0.0412498	-0.050599	-0.00661107	0.00822864	0.0382431	0.0189491	0.0487481	-0.0146835	-0.0187145	-0.0666861	-0.0121468	-0.0133657	0.0387717	0.00658092	0.0225808	-0.0179308	0.0842777	-0.00147679	0.056111	0.0903699	0.0332576	-0.0248973	-0.0325697	0.0342775	-0.011447	-0.0422511	0.00147528	-0.103568	0.0533422	0.0144155	-0.0682413	-0.054613	0.0379777	0.013783	0.0550386	0.0663537	0.0637504	0.0664442	0.0381959	-0.013916	0.127071	-0.0743754	-0.0297856	-0.069769	-0.0403935	-0.0655471	-0.112559	-0.0393558	0.05228
IQGAP2_Q13576	0.00442688	0.161126	0.114173	0.110304	0.0155437	0.0476375	-0.0044405	0.111533	-0.00777348	-0.0374524	0.00544335	-0.0353177	-0.137721	-0.00481638	-0.0712276	-0.00771999	0.181626	0.124432	-0.0763138	0.0313913	0.150073	0.182048	0.0765709	0.0719445	0.139977	-0.0320896	-0.357056	-0.052404	-0.0374702	-0.231655	-0.172382	-0.0868767	0.0395694	-0.070794	0.0369612	-0.0677825	0.000308728	0.0250363	-0.0489306	0.165489	-0.185875	-0.0158053	0.0980468	0.0732201	-0.000308794	0.0108926	-0.103571	-0.173667	0.0704398
IQGAP1_P46940	0.0345087	-0.0364917	0.0374818	0.0561533	0.0537596	0.0754068	0.00786706	-0.0636279	-0.00180948	-0.0181381	0.0127727	0.00180721	-0.0359395	-0.0430292	-0.0649279	-0.0647708	0.0879732	0.0351979	-0.0298197	-0.0896396	0.055543	0.0439803	0.0319783	0.0810861	0.0292158	0.0588015	-0.0866057	-0.184592	-0.111242	-0.151318	-0.0562864	-0.127698	0.064415	0.0601476	0.00335857	0.0999601	0.0305151	0.101669	0.000415917	0.0412474	-0.000416037	-0.0486557	-0.067242	-0.0600254	-0.035981	-0.0409676	-0.0682859	-0.0224094	0.0809222
IQGAP3_Q86VI3
TARBP1_Q13395	-0.0671241	-0.152624	0.0396748	0.0067298	0.0384487	-0.0125054	-0.00489898	-0.0390851	0.115469	-0.0184623	0.110091	0.0190085	0.0807552	-0.0939852	0.00488241	-0.121059	-0.0158132	-0.127818	0.13077	-0.286662	0.0525697	-0.0456847	0.0806928	-0.0710461	-0.133971	0.0368277	0.0518863	-0.106819	0.0192633	-0.168655	0.138858	0.0156417	0.190231	-0.00431357	0.174842	0.0563794	0.0594937	0.0359844	0.0908533	0.119155	-0.0834456	-0.105492	-0.141463	-0.00580777	-0.0353948	-0.0183122	0.00430071	-0.0658752	0.102314
H1-5_P16401	-0.327213	-0.337652	-0.0168164	-0.216199	-0.0123583	-0.314623	0.107017	0.55893	0.244515	0.125805	-0.0172611	0.0122534	-0.107811	0.147588	0.0303053	0.245368	-0.717313	-0.262997	-0.159246	-0.103934	0.0416784	0.174736	-0.0429184	-0.0832029	-0.117744	-0.144526	0.250401	0.359144	0.319227	0.200229	0.0693736	0.335787	-0.340841	-0.293582	-0.167766	-0.476717	-0.374469	-0.333864	-0.135236	0.0771755	0.0500398	0.233832	0.409889	0.299185	-0.00472763	0.00471218	0.447368	0.155463	-0.247314
H1-2_P16403	-0.388473	-0.395508	-0.0584544	-0.290541	0.00261216	-0.372451	0.124749	0.597808	0.270294	0.148713	-0.0026169	-0.0244566	-0.103499	0.156499	0.039753	0.238515	-0.704724	-0.213306	-0.118058	-0.0841789	0.0236172	0.0761586	-0.0240103	-0.0849921	-0.0674341	-0.189331	0.33223	0.420896	0.396114	0.317664	0.130499	0.434941	-0.278122	-0.230123	-0.172701	-0.370163	-0.261437	-0.372062	-0.122859	0.143786	0.120105	0.317082	0.443717	0.369556	0.011885	-0.0119837	0.489029	0.230835	-0.252992
H1-4_P10412	-0.174016	-0.16404	-0.0327361	-0.161672	-0.0206145	-0.356111	0.0457431	0.580013	0.29988	0.0996683	-0.0522344	-0.0445438	0.0203241	0.244906	0.0550352	0.298512	-0.790752	-0.280434	-0.174711	-0.108847	0.031222	0.162088	-0.0319126	-0.117283	-0.276619	-0.197263	0.294842	0.33816	0.278639	0.16028	0.0743072	0.335489	-0.370778	-0.307288	-0.27089	-0.459109	-0.36937	-0.38827	-0.113455	0.0468309	0.0703564	0.255077	0.393169	0.243286	0.0143596	-0.014504	0.411067	0.126286	-0.247472
H1-3_P16402	-0.31536	-0.295127	-0.00383707	-0.230936	-0.015728	-0.349239	0.130671	0.652699	0.338062	0.111162	-0.0463222	0.00382689	-0.0705761	0.153664	0.0168009	0.262142	-0.574796	-0.17995	-0.179515	-0.119002	-0.0235244	0.261917	0.023147	-0.0679581	-0.102512	-0.0324995	0.359739	0.455523	0.350149	0.169051	0.181671	0.328839	-0.336266	-0.280718	-0.181615	-0.401632	-0.302049	-0.273964	-0.0974663	0.0611114	0.0717893	0.236562	0.320306	0.267458	0.0347023	-0.0355577	0.409407	0.0954681	-0.297166
EEF1A1P5_Q5VTE0	0.0680642	-0.0437179	0.00247667	0.0181389	0.0172344	0.0910776	0.076902	-0.0662546	-0.0131241	-0.0550936	0.0464142	-0.0387071	0.0153504	-0.049519	-0.00248093	-0.0519979	0.0467489	0.0617231	-0.0465272	0.0107893	0.00676036	0.00361539	0.00192141	-0.000780616	0.0470331	-0.0135663	-0.0735079	-0.0828523	-0.0646709	-0.029562	0.000780194	-0.0140496	0.0107434	0.0347563	0.00166275	0.087834	0.0500559	0.0199017	-0.00458682	-0.0291726	-0.0151194	-0.0355575	-0.00434791	-0.0285286	0.00660846	-0.00166467	-0.00636014	0.00861878	-0.00187882
EEF1A1_P68104	-0.0593843	0.139777	0.0193972	0.085194	0.115678	-0.76726	-0.158748	-0.0702034	-0.0147858	-0.0463694	-0.592588	-0.0926012	0.187404	0.0544143	0.208474	0.0146358																	0.40166	0.08363	0.1748	-0.0862061	0.279526	0.143825	0.042585	0.321787	0.0666027	-0.672644	-0.905089	-0.0438804	-0.199976	-0.741645	-1.08018	-0.690702	-0.259044
EEF1A2_Q05639	0.0640112	-0.0486152	0.0115026	0.00227322	0.0191172	0.0801294	0.0386366	-0.0318486	-0.00548686	-0.00575856	-0.00471617	-0.0022768	0.035566	-0.0207532	0.0221341	-0.0183967	0.0807026	0.0246172	0.0481807	0.0321926	0.0347601	0.00881053	-0.0231347	-0.0182842	0.0254334	-0.00886467	-0.0614261	-0.0328304	-0.0115041	-0.0269759	0.00929326	-0.0219857	0.0658809	0.0113453	0.0739158	0.0599283	0.076239	0.0694697	0.0209662	-0.0134045	-0.0379212	-0.0698664	-0.0194455	0.010737	-0.0135796	-0.0453043	-0.0629319	-0.0108175	0.0920842
NMD3_Q96D46	0.00804439	-0.0579385	0.00589412	0.0239704	0.0366469	0.0904449	0.0925506	0.0486897	-0.00693405	-0.0522189	-0.0059183	-0.0333526	0.0115883	-0.103689	-0.0100529	-0.0828628	0.0333824	-0.0124022	0.116236	0.0611562	0.000375422	-0.000375519	-0.029447	0.0887758	-0.0719622	-0.102222	0.16064	0.0681537	0.0194344	-0.00623984	-0.136863	-0.189457	0.0734809	0.0455171	0.0636997	0.102192	0.0109346	0.0875082	0.00122034	0.0144304	-0.0747299	-0.175797	-0.170113	-0.187843	-0.0946284	-0.124968	-0.00122137	-0.0222147	-0.0171171
CNOT3_O75175	-0.0131698	-0.0702427	0.0544413	0.0829238	0.068328	-0.0142889	0.0291097	0.0145704	-0.0127331	0.0206337	0.0188325	-0.041249	-0.0100504	-0.0134757	-0.0442098	0.00998089	0.121164	-0.0116256	-0.0244044	0.0523259	0.00301249	0.159011	0.1114	0.0522835	-0.0496671	-0.083001	-0.0030188	-0.0987217	-0.0490253	-0.105508	0.0282964	0.0271726	-0.00399552	0.0674636	-0.00639026	-0.0284706	0.00448755	0.0193019	-0.0149354	0.0420492	0.01029	0.0118885	-0.00231392	-0.0173624	0.00231022	0.0187651	-0.00605787	-0.00433904	-0.00986632
TOR3A_Q9H497	-0.00204306	-0.042598	0.00439682	0.0375197	0.00204017	-0.0353443	-0.0694106	-0.119308	-0.00443569	0.0648432	-0.0071773	0.0597673	0.071617	0.0481783	-0.0472834	0.00421762	-0.0327301	0.0409731	-0.045884	-0.0378732	0.0644929	-0.0177598	-0.00407977	0.0547556	-0.00344213	-0.011979	-0.0176525	0.0469097	0.0472576	0.00343393	0.0145039	0.03352	0.0325719	0.0150992	-0.0282044	-0.041324	0.00424749	-0.0493922	-0.010632	-0.0243324	-0.00426003	0.0417657	0.0429204	0.11456	0.0235412	-0.0211651	0.0216811	-0.0394377	0.00428425
BAG6_P46379-3	-0.00220892	-0.0508522	-0.00245828	0.0517362	0.0524477	0.0187583	0.000268531	-0.058689	-0.0569494	0.0110536	0.0344279	0.0358182	-0.0240736	-0.0162844	-0.000268581	0.00883065	0.0519941	0.0232883	0.0378698	-0.0468341	0.0689843	0.0116963	-0.0168604	0.0696061	-0.0117919	0.029603	-0.0410094	-0.0369099	-0.0854709	-0.0684021	0.044414	-0.0342022	0.0756932	0.0320107	-0.0600294	-0.0271991	0.0408935	0.0917637	0.0269968	0.0633254	-0.0645037	0.00208125	0.00652163	-0.00208425	-0.019746	-0.0272297	-0.0797516	-0.0275233	0.0179469
FARSB_Q9NSD9	0.0225239	-0.0785155	0.0379909	0.0156554	0.00804242	0.0113271	0.00860492	-0.0258967	-0.0169996	-0.0236015	0.0137216	0.0165871	-0.0259766	-0.0469263	-0.0256663	-0.00808751	0.0628118	0.0027027	0.0355913	0.0353299	0.0467719	-0.00974185	-0.0250928	0.038643	-0.00190288	-0.0254571	0.0091282	-0.0405661	-0.0215046	0.00190037	-0.00382101	-0.0350618	0.0317878	0.0202076	0.00375334	0.0299253	-0.0108047	0.0520181	-0.00603848	0.0627875	-0.0229679	-0.0143198	0.0535387	-0.00969071	0.00939435	-0.018435	-0.0304837	-0.00376313	0.0243698
FHAD1_B1AJZ9-3	-0.47623	0.105578	-0.238353	0.207919	-0.0266608	-0.244933	-1.01074	-0.344778	0.0261771	0.421501	0.0277319	0.278571	0.223355	0.309134	-0.420462	-0.095718	-0.213962	0.0249256	-0.00437358	-0.192996	0.104939	0.423565	-0.0296342	0.17671	0.00436036	0.648173	-0.0826404	-0.0469343	-0.217696	0.0072254	-0.261654	0.17548	-1.00369	-0.111754	0.247659	0.189197	0.148922	-0.184839	-0.95777	0.123303	0.00550406	-0.106633	-0.390693	0.0251953	0.193256	-0.37771	0.424639	-0.00552514	-0.305311
RIDA_P52758	-0.00731239	-0.122246	0.0239569	-0.005162	0.0051436	-0.064308	-0.0467784	-0.0784403	-0.0440868	0.0230606	0.00845983	0.0749631	0.0307813	0.0373889	0.0409017	-0.0353285	0.0327243	-0.109934	-0.0198042	0.0176186	-0.0777666	0.00203447	-0.0615522	0.00974194	-0.0327338	0.0688168	-0.00203735	0.0926004	-0.0768518	0.0968292	-0.00327898	0.00956738	-0.154258	0.106051	-0.00887262	0.0149139	0.00881839	0.0121652	0.0499914	-0.040249	-0.16292	-0.0834612	-0.0736898	-0.126493	-0.0306775	0.0553262	0.0412185	0.0612487	-0.0927222
DERA_Q9Y315	-0.0367671	-0.0378868	0.0442104	0.00332141	-0.00814709	-0.0654487	-0.022419	-0.0341161	-0.000653175	-0.0198622	0.0477951	0.0569926	0.0842057	0.00065288	0.0564192	0.0405403	-0.033586	0.0311262	-0.00833075	0.00702056	0.00156295	-0.0257614	0.0125791	-0.00180533	-0.0617187	0.0624309	-0.0244936	-0.0228041	0.0937813	0.0033537	0.0181733	-0.00156465	-0.0715936	0.0219576	0.0444592	0.0560568	0.0177601	-0.0432576	0.00857708	-0.0857645	-0.0169286	-0.0236897	-0.0112935	0.0291612	0.0527757	-0.0505481	-0.00642319	0.00639472	0.0178366
KARS1_Q15046	-0.133156	-0.183554	-0.0841343	-0.107874	-0.0651864	-0.114733	-0.0415755	0.0495262	-0.00910597	0.0204098	0.0307115	0.0700577	0.0184966	0.0454215	0.00904885	0.0764504	-0.30871	-0.216262	-0.088547	-0.136921	-0.045054	0.162852	0.152421	0.12943	-0.0656228	0.170518	0.377221	0.281981	-0.0140245	-0.040858	0.199624	0.0138894	-0.129018	-0.106459	-0.0975544	-0.172658	-0.11836	-0.138096	-0.0543006	-0.00214697	0.00214378	0.14687	0.153488	0.173592	0.0466243	0.0192877	0.192073	0.0855927	-0.126627
KTN1_Q86UP2	-0.026202	-0.0784581	0.0447841	0.0214102	0.0269435	-0.0450984	-0.0105601	0.0950979	0.0565239	0.0187837	-0.0223214	0.0104834	-0.0423032	-0.015079	-0.0285986	0.0386938	-0.0102926	0.000672023	-0.0651032	-0.106728	0.00461471	0.0493004	0.027245	-0.000672336	-0.0507602	-0.0254096	-0.0425577	0.0305823	0.0225704	-0.117365	0.0575408	0.109553	0.00569879	-0.083616	-0.0615119	-0.101328	-0.0184862	-0.00572139	-0.0293198	0.0981914	-0.0459066	0.024234	0.116554	0.128058	0.00969433	-0.00756159	0.140015	0.0786098	0.0805214
DNAJC2_Q99543	0.0870377	-0.0264801	0.172466	0.0892242	0.167056	0.0615352	0.0314314	0.184747	-0.0043776	-0.0282833	-0.0414469	-0.039076	-0.095711	0.00436435	-0.175715	-0.00954079	0.00183661	0.0272542	-0.0742897	-0.06143	0.149764	0.0432375	0.0855308	0.0393113	-0.0611393	-0.156701	-0.134879	-0.114589	0.0675212	-0.0817576	-0.00183895	0.0308087	-3.71508e-05	-0.0677859	0.0382297	-0.0311405	-0.0429017	0.0544414	-0.0941301	0.0984588	3.71498e-05	0.0750428	0.147802	0.16957	-0.0737483	-0.0982875	0.111561	-0.0655706	-0.0138701
DHX16_O60231	0.0219046	-0.0734139	0.0263001	0.0379854	0.026445	0.0354898	0.0348709	-0.0321198	-0.0170383	-0.0319877	-0.024889	0.0041556	-0.00157948	0.00157775	-0.0366593	-0.0113578	0.0499165	-0.000724338	0.0301978	-0.0543878	0.000723975	0.00212017	0.0214082	0.0661788	0.0485703	-0.0587122	0.00939262	-0.0334327	-0.0677021	-0.0521504	-0.00254602	-0.104505	0.00750223	0.0189737	0.0364391	0.0805739	-0.0176219	0.0311088	0.0274817	0.0180243	-0.028006	-0.0479946	-0.051824	-0.00796344	0.0421664	-0.00754145	-0.0128369	-0.0768225	0.0505869
DHX15_O43143	0.0327082	-0.0870995	0.0147887	-0.0142341	0.00321276	0.0193986	-0.0108095	-0.0404331	0.00341051	-0.00175847	-0.00468748	0.00276195	0.00175633	-0.0181615	0.018177	-0.00474298	0.022665	-0.0197004	0.0205897	-5.87734e-05	-0.000642027	0.0113078	0.0103081	0.00682789	-0.0238325	-0.00939605	-0.00543686	-0.0363453	-0.0150467	0.0176967	0.00207397	5.8771e-05	0.000708549	0.037706	0.017321	0.0238692	0.0260552	0.0195237	0.0079148	0.0118977	-0.0273727	-0.0433467	-0.0816186	-0.06148	-0.0467971	-0.00175847	-0.000708897	-0.0116364	-0.0139839
DHX8_Q14562	0.0150788	-0.0404171	-0.0504934	0.0251162	0.0293115	0.086408	-0.00779103	-0.0596469	-0.0438282	0.0403078	0.0541819	0.0657741	-0.0122793	-0.0800973	-0.0719288	0.00774919	0.0331156	0.085984	0.192432	0.0402552	-0.025492	-0.161879	-0.228802	-0.229973	0.2029	-0.267428	-0.398367	-0.025635	-0.295595	0.0250494	0.0499282	0.106656	-0.0301898	-0.0471046	-0.0504243	0.0351269	0.110901	-0.023084	-0.0448514	-0.0638688	-0.0808081	-0.0213259	0.16792	0.110524	0.0529329	0.0210152	0.048276	0.186584	0.115471
DHX38_Q92620	0.0140038	-0.0677172	-0.0111404	0.030595	0.0408322	-0.0244526	-0.0185108	-0.0923811	-0.0242903	-0.0195303	0.0227661	0.0516737	0.110835	-0.0135899	0.0257774	0.011055	0.0211442	-0.00823208	0.0196984	0.0901091	-0.000997223	-0.0381192	-0.103488	-0.0841071	-0.0040719	-0.0717152	0.000996534	0.058897	0.0724311	0.0849981	0.0164549	-0.0105322	0.0093291	0.0361829	-0.024555	0.0300481	0.0325106	0.00959105	-0.00819137	-0.021035	-0.0912214	-0.0618519	0.0498281	-0.0196276	0.0237414	-0.0579076	-0.015397	0.00814512	0.0235855
ATP6V1D_Q9Y5K8	-0.0306125	-0.112481	0.0378565	-0.00934052	-0.0144599	0.0500682	-0.0249433	-0.086599	0.00124	0.0342908	0.034347	0.0508335	0.0397133	-0.0576399	0.0264998	-0.00124107	-0.0397111	-0.0291203	0.00317789	-0.0542956	0.0217547	0.014687	0.0508991	-0.0366077	0.03545	0.032	-0.0199396	-0.0938002	0.0322524	0.0144042	-0.0031849	-0.0365321	-0.0155388	-0.00243936	0.02012	-0.0252328	0.0332815	-0.0486971	0.0381717	-0.0440819	-0.0276495	-0.0399503	0.0481032	0.073456	0.0186562	-0.013719	0.0542842	0.00243524	-0.13009
GART_P22102	0.0797808	-0.00432104	0.0439539	0.039818	0.0405618	0.0733076	0.0591682	0.0590303	-0.00490235	-0.0465197	-0.0212888	-0.0293347	0.00430814	-0.0201696	-0.00927894	-0.0239116	0.113338	0.0410474	-0.023239	-0.0282553	-0.050584	0.115873	0.0139022	0.0853919	0.066253	-0.0140374	-0.0334434	0.0160859	-0.0439451	-0.0654595	0.0353524	-0.0530851	0.080603	0.00691939	0.0945935	0.0775465	0.0340819	0.0722675	0.0673562	0.0694097	-0.0413298	-0.0657567	-0.00695273	-0.0265463	-0.0128501	-0.0656693	-0.0738795	-0.0519205	0.0625746
GART_C9JZG2	-0.0154262	-0.159109	0.0709613	-0.239054	0.015263	0.196591	0.151549	0.108131	-0.050113	0.0563217	0.121713	0.0315117	-0.155463	-0.201484	-0.207454	-0.230869	0.110284	0.0673779	0.228343	-0.00881812	-0.0674154	0.0539974	0.00490971	-0.0435456	0.280253	-0.0899706	-0.390898	0.00481482	-0.416935	-0.142687	0.148984	-0.00483094	-0.108733	-0.264636	-0.0539635	0.237656	0.106233	-0.0470187	0.0468119	-0.150394	-0.181006	-0.0597096	0.244244	0.0587638	0.136986	-0.0249311	0.0245076	0.216562	0.422507
HSPA14_Q0VDF9	0.0780928	-0.0446112	0.106849	0.0405682	0.0771586	0.069339	-0.00948102	0.0327813	-0.0233487	-0.0261439	0.0215662	0.00941912	-0.0601904	-0.0576665	-0.122896	-0.0358957	0.00379869	0.0712661	-0.00380872	-0.0624987	0.134993	0.0538143	0.0149425	0.0437724	-0.0612077	-0.0635357	-0.140665	-0.0844434	0.0429209	-0.127112	-0.108186	0.017136	0.0369528	0.0138069	0.0400654	-0.0141496	-0.0668031	0.0371121	-0.0428627	0.0674401	-0.030728	0.0751738	0.139803	0.146985	-0.0250034	-0.0225308	-0.0139403	-0.0310316	0.0118631
STT3B_Q8TCJ2	-0.014611	-0.0888294	0.00458628	-0.0137259	-0.0046009	-0.00828248	-0.0246113	-0.0152986	0.03019	0.0614366	0.0715425	0.0489267	-0.0181384	0.0293088	0.0241758	0.108235	-0.124725	0.0298478	-0.0816048	-0.0338441	-0.0187774	-0.0661472	0.00433678	-0.0038109	-0.00372996	-0.0920551	0.0907163	0.0428929	0.0772656	0.0613471	0.00372034	0.139855	-0.155722	-0.0127866	-0.146798	-0.0658382	-0.0489982	-0.062809	-0.0238619	0.0186705	-0.00122994	0.0210456	0.0486068	0.00122889	0.0165491	0.0371226	0.0834353	0.0708279	-0.168035
STT3A_P46977	0.0213301	-0.0770114	-0.00626378	-0.00277401	0.0023392	0.0152712	-0.0180532	-0.0541732	0.021185	0.0406851	0.0462909	0.0321622	-0.0418824	-0.0514548	-0.00234299	0.0506471	-0.00788112	0.0089523	0.0638783	-0.0424687	-0.0222938	-0.0219107	0.028148	0.0202744	0.0479867	-0.0681595	0.00757053	0.00202331	-0.00879984	-0.0270122	-0.00202615	0.0221766	-0.0656711	-0.0138261	-0.0847158	-0.0627339	-0.0415058	0.018339	-0.0173078	0.00743892	-0.00747748	0.0230113	0.0615818	-0.0333005	0.00811859	0.0161064	0.039049	0.0641127	0.017405
DDX1_Q92499	-0.0618961	-0.144808	0.0624977	-0.0258123	0.0493873	-0.0607733	0.109318	0.280502	0.0385063	-0.0243754	0.0104989	0.00656135	-0.0930356	-0.00659133	-0.0326578	0.0573096	-0.148344	-0.0531431	-0.0129491	-0.00384235	0.00993924	0.0143715	0.00962163	0.058053	-0.129983	-0.142331	0.0701183	0.0857678	0.138895	0.00383215	-0.0241226	-0.0368983	-0.0629563	-0.0662321	-0.0612213	-0.0700346	-0.0660024	-0.00489471	0.00487816	0.130332	-0.0209919	0.0371967	0.234287	0.211563	0.00512704	-0.0932647	0.116652	0.0551185	0.0199532
GNPDA1_P46926	-0.00553471	-0.0652154	0.0111333	-0.000449344	0.00164486	-0.00598926	0.000449204	-0.0889998	-0.00235454	0.0193456	0.0279962	0.0190515	0.0550359	-0.0175261	0.044812	-0.00265998	0.0434264	0.00981131	0.0398469	0.0664954	0.0334965	0.000441122	-0.00227241	-0.0333776	0.0660718	-0.000441256	-0.0589973	-0.0517677	-0.0274139	-0.00974361	0.00650613	-0.000688512	-0.0265666	0.0217992	-0.0220047	-0.00306849	0.0264854	0.00483573	0.0244361	-0.0257763	-0.0122807	-0.0163984	-0.0243496	-0.073542	0.04514	0.0655334	0.0817059	0.00306197	-0.0679428
GNPDA2_Q8TDQ7	-0.028266	-0.149392	-0.00225324	0.0286046	-0.00241531	0.00224972	0.0368842	-0.0231362	-0.0367323	0.115949	0.0651847	0.0936818	0.0651825	-0.063699	0.020929	-0.0138292	0.00985404	-0.030735	-0.00992181	0.154847	-0.0498727	-0.0858127	0.174018	-0.0723315	-0.0777006	0.268205	0.013138	-0.0311105	0.0118248	0.0569543	0.0784828	-0.126701	0.189167	0.0657282	0.185364	-0.00651484	-0.0216125	0.112759	0.194885	-0.0214037	0.0354211	-0.0714556	-0.189527	-0.0926008	0.00648556	0.0345886	-0.0455945	-0.145919	-0.12277
KIAA2013_Q8IYS2-2	0.0248211	-0.086515	0.0071893	-0.00695121	-0.00909197	0.0121373	-0.0674219	-0.0717761	-0.0462897	0.0157292	-0.0150311	0.0594444	0.0499526	-0.0435117	0.0432699	0.00691788	-0.125475	0.050735	-0.099992	0.0312469	0.105493	-0.03415	-0.0331515	-0.0112208	0.061035	-0.0337879	-0.00275215	0.139898	0.177959	-0.0389818	0.00274691	0.136567	-0.0385567	-0.0451934	0.00978023	0.033821	-0.0403669	-0.0110018	-0.0116332	0.0152044	0.0165189	-0.148454	0.0117877	-0.0691001	-0.00921177	0.00915332	0.0637269	0.033742	0.120023
PRRC2B_Q5JSZ5	0.111262	-0.0686936	-0.0353612	0.026857	0.00655298	0.0187181	-0.0585827	0.0306437	0.0527034	-0.0583903	-0.131764	0.0647896	-0.00658288	-0.0673744	-0.100399	0.0897216	-0.0541049	0.0129104	-0.0438907	0.0311996	0.0107233	-0.0614206	-0.0686742	-0.0565666	0.152038	0.071707	0.0765148	0.0270813	-0.0374474	-0.0115389	-0.0108036	0.165157	-0.0730712	0.00154503	-0.0810333	-0.00154669	0.0733999	-0.0587198	-0.123824	-0.0536112	-0.00501572	0.0495344	0.0208567	0.127208	0.0695963	0.0688304	0.0180821	-0.022785	-0.015647
PRRC2C_Q9Y520-7	-0.201381	-0.200381	-0.0890309	-0.102075	0.00429676	-0.179815	0.0135029	0.200336	0.0622118	0.0736925	-0.00430959	-0.00523409	-0.0334072	0.0848025	0.00746592	0.109018	-0.290318	-0.130388	-0.0278654	-0.0126667	-0.000899674	0.000899113	0.00324692	-0.0227255	-0.0325963	-0.0310065	0.19722	0.273704	0.295627	0.175489	0.0970921	0.223331	-0.17549	-0.144707	-0.161051	-0.190493	-0.122031	-0.190954	-0.0480219	-0.00757359	0.00753404	0.173284	0.238899	0.217334	0.0536241	0.0123631	0.282577	0.137676	-0.126932
PRRC2A_P48634	-0.148461	-0.22646	-0.03476	-0.113199	-0.0173863	-0.12487	0.0241648	0.174349	0.0812379	0.0243827	-0.0105443	0.0104678	-0.0399689	0.0348532	0.0107109	0.123251	-0.240116	-0.113324	-0.00598258	0.0329839	0.00595787	-0.0362435	-0.00958712	-0.0378804	-0.0642598	-0.0571293	0.232241	0.302505	0.264078	0.151008	0.109636	0.215936	-0.119663	-0.0664308	-0.0648538	-0.110339	-0.0540712	-0.113505	-0.0108122	0.0150548	0.00179263	0.125692	0.185434	0.16659	0.0478502	-0.00179486	0.200675	0.1276	-0.0980919
LRRC47_Q8N1G4	0.0207251	-0.0700608	0.00583962	-0.00492667	0.031228	0.0080731	0.0373099	-0.00607159	0.0203776	-0.0451122	0.0049099	-0.0225407	0.0108406	-0.0233835	-0.0078961	-0.0238613	0.0699359	-0.0375317	0.0908353	0.00204811	0.0357284	-0.00339228	-0.0317964	0.0298902	-0.057439	-0.00205102	0.0129614	0.00732364	0.00496042	-0.0305485	-0.0527853	-0.083077	0.0858396	0.04378	0.0591615	0.036744	-0.0141535	0.0413258	0.0319651	0.0358048	0.014016	-0.058077	-0.110139	-0.0686948	-0.0424164	-0.0588544	-0.0838192	-0.0415956	0.0104953
METTL26_Q96S19	0.00336085	0.467691	-0.2981	-0.399904	0.0991368	0.0326252	0.129511	0.0724642	-0.191179	-0.00336869	-0.245222	-0.300271	0.364881	-0.526838	-0.287788	0.381998
LAP3_P28838	0.0210058	-0.0460063	-0.0115001	-0.00115973	-0.00189109	0.0325188	0.0143444	-0.0435006	-0.00011063	0.0035012	-0.00632642	0.0223839	0.0314097	-0.00559975	0.0354272	0.000110621	-0.027266	-0.058064	0.00964856	0.0178599	0.0786265	0.107466	-0.00971352	-0.0107371	-0.0358666	0.0305988	0.0642535	0.010978	-0.0504351	-0.0383282	0.0401251	-0.0988606	0.0277417	0.0155863	0.0442838	0.00865006	0.0236348	0.00911962	0.0331642	-0.0328266	-0.0257613	-0.00870224	-0.0882177	-0.0704279	-0.00944439	0.0314289	-0.0143196	-0.01294	-0.0552715
CDC5L_Q99459																	-0.104135	0.106412	-0.567293	-0.0237055	0.105519	-0.107147	0.0977666	-0.233891	-0.055193	0.39492	-0.212139	-0.127017	0.0233222	0.135433	0.0480491	0.238108	0.217892	0.281816	-0.273038	-0.129679	-0.144242	-0.329462	-0.0755389	0.442623	0.129699	-0.0324176	0.531546	0.24822	-0.0432042	0.0154296	0.0235029	-0.0155964	-0.285751
ADSL_P30566	0.00819949	-0.103366	0.00698446	-0.0292872	-0.021872	-0.0145018	-0.00771799	-0.0769918	-0.000721522	0.00207266	0.0182973	0.0399565	0.0473195	-0.00977229	0.0528066	0.000721161	0.0537694	-0.0359832	9.10291e-05	0.03113	-0.0343326	-0.0542495	-0.0274222	-0.058472	0.00792562	0.0687164	0.0258087	-0.0263375	0.0274964	0.0100258	-0.0306931	-9.10348e-05	0.0401538	0.0183792	-2.76555e-05	-0.0123617	0.0254226	-0.000165941	0.00962184	-0.0706537	-0.00837384	0.00524496	-0.0730299	-0.0327038	2.7655e-05	0.0616532	0.00447092	-0.0152539	-0.0339243
RAP1GAP_P47736-4	0.0317826	-0.0257026	0.0740566	-0.145068	-0.189476	0.448426	0.050252	-0.0802587	0.144375	0.0252527	-0.139925	0.0306501	0.140836	-0.19511	-0.0592901	-0.0808827	-0.0376825	0.157685	0.0147704	0.0909698	0.195517	0.0403998	-0.101495	-0.0462277	-0.0999938	-0.0149232	-0.671044	-0.302201	0.0177625	-0.303968	0.0388978	0.162549	0.028796	0.0623776	-0.0916332	-0.00562491	0.102723	0.0928208	-0.0251055	0.140764	-0.145985	0.0634658	0.00560307	-0.0612731	-0.0284001	0.147623	-0.209384	-0.147101	0.04858
TMA7_Q9Y2S6	0.166749	0.0736788	0.0298438	0.0168714	-0.0653531	0.0260532	-0.0396332	-0.0155165	0.0513752	-0.0137612	0.0111407	-0.0112274	0.0638506	-0.0299706	-0.0666099	-0.0394058	0.109329	0.0449651	-0.120975	-0.019197	-0.188511	0.0189449	-0.150005	-0.0346368	0.0879098	0.0818019	-0.0641744	0.0677521	-0.0621713	-0.0591165	0.0489091	0.0474001	0.0230275	-0.00370465	-0.00339508	0.0354232	0.0414168	-0.0571503	-0.0203289	-0.0722405	-0.0807821	0.0336255	-0.0718529	0.00338711	-0.0399992	0.0528656	0.00441215	0.0164625	0.0535419
P4HB_P07237	0.0544729	-0.0223712	0.000513151	0.00661085	-0.0497085	0.0230106	-0.0201543	-0.0688664	0.0098471	0.0104701	0.0281774	0.0205613	-0.00722537	-0.0358509	-0.004578	-0.000513334	-0.0182246	0.00190408	-0.0373924	0.00820695	-0.0483136	-0.0383893	-0.0447687	-0.0432015	0.0371357	-0.00679076	0.0782858	0.10818	-0.0019066	0.00339839	0.00606081	0.0216194	-0.0119962	0.041961	-0.0203309	-0.00149552	0.0051555	-0.0226676	0.00149397	-0.0353296	-0.00286547	0.0230503	-0.0444975	-0.0341198	0.0182751	0.0568266	0.0273368	0.0262772	-0.0291082
P4HB_H7BZ94
SF3B1_O75533	-0.0480357	-0.0653339	0.0250133	-0.0388831	0.0733281	-0.0598557	0.0278059	0.0686902	0.0319431	-0.0221363	-0.00289327	0.0217631	-0.0112895	0.00288748	-0.0519068	0.00619189	-0.10398	-0.043426	-0.0550379	-0.0807814	0.122457	0.131285	0.101085	0.0949688	0.0185398	-0.00406563	0.00653868	0.0133839	-0.0473109	-0.0796962	0.0040542	-0.0257012	0.0228443	0.00622634	-0.0159305	-0.0653725	-0.0254006	0.0550838	-0.0342293	0.0878542	-0.0325932	0.0486527	0.0550172	0.024367	0.0235412	-0.00625333	-0.0637249	-0.046727	0.0129918
THUMPD2_Q9BTF0	-0.11723	-0.182671	0.0630548	0.00462043	-0.0209354	-0.0650778	-0.025376	-0.00463527	0.0669072	0.0613842	-0.0508767	0.0558934	0.0940836	0.0980508	0.021762	-0.0704167	-0.0752013	-0.115333	-0.0594729	0.0182657	0.184292	-0.0591089	-0.0780825	-0.143106	0.0284538	0.169126	-0.0757352	0.153438	-0.0184999	0.138943	0.0906281	0.199838	-0.0850406	-0.0310801	0.00606322	-0.0476739	0.0230057	-0.051778	-0.0739017	-0.00944032	-0.00608881	-0.0644463	0.0627027	0.0799905	0.0461891	0.0743285	0.0414473	0.0739418	-0.0630983
RPS6KB2_Q9UBS0																																	-0.200643	-0.0437548	-0.101298	0.14848	-0.0339714	0.000445538	-0.136192	-0.000445676	0.0036838	0.131218	0.15214	0.221714	0.181908	0.151321	-0.234789	-0.21049
AKT2_P31751	0.101215	-0.0311991	0.103343	0.05443	0.0811238	0.0825879	0.047324	-0.00555814	0.0126123	-0.0183287	-0.0505163	0.00430875	-0.00432166	-0.0611678	-0.130807	-0.117672	0.140751	-0.00860155	0.0372526	0.0515219	0.01172	0.032756	0.0524201	0.0451245	-0.0215802	0.00855057	-0.0744731	-0.163738	-0.243887	-0.221477	-0.152315	-0.197013	0.0720588	-0.0317247	-0.0343576	0.0729928	0.0697169	0.0395159	-0.0288365	0.00934589	-0.0785042	-0.0314287	0.0701207	0.0309309	-0.00940683	-0.045784	-0.0346423	0.0253658	0.163242
AKT1_P31749	0.266486	0.156159	0.122023	-0.182879	0.356192	0.157428	-0.106588	0.188852	-0.00985244	-0.00176004	0.0017579	0.365855	-0.235758	-0.252418	-0.0494276	-0.0861721	0.0388826	0.0152644	0.221795	0.209457	0.0830489	-0.131518	-0.0154276	0.0232106	-0.0360355	-0.0910759	0.213552	0.23087	-0.135377	-0.152947	-0.0274143	-0.13206	0.109841	-0.0521046	0.0800931	0.01537	-0.0126022	0.0479945	0.0124931	0.106416	-0.0319511	-0.0322716	0.109288	0.16035	-0.0593282	-0.084327	-0.0223043	-0.0644328	-0.0687626
RPS6KB1_P23443	0.0699844	-0.0350625	-0.0149319	0.019613	0.0666011	0.099478	0.030988	-0.0961461	-0.013653	-0.0170425	0.134376	0.0768718	0.013525	-0.0240964	-0.0848739	-0.0599119	0.113556	0.0491686	0.0324557	-0.00654679	0.0881628	0.0028457	0.0215537	-0.00285132	0.0515786	0.0180479	-0.15015	-0.127093	-0.157741	-0.14479	-0.0316977	-0.118186	0.0706204	0.0015906	0.0267864	0.103076	0.0362799	0.0284947	-0.0198705	0.0288022	-0.0233004	-0.0164487	-0.00589355	-0.0117787	-0.00159235	-0.055496	-0.0926998	0.00963193	0.0985412
HERC2_O95714	-0.786069	-0.333394	-0.541652	-0.17867	0.0388524	0.116827	-0.0326745	0.0319508	0.0644171	0.407515	-0.790469	0.164495	0.0571281	0.31758	-0.0573746	-0.320901	-0.573587	0.0179468	0.138475	-0.0483221	-0.205067	-0.126496	0.0269985	-0.196167	-0.173594	-0.146898	0.258248	0.439436	-0.0181729	0.106653	0.249618	0.333978	-0.157942	-0.099263	-0.296467	-0.160866	0.0966838	-0.130506	-0.122402	0.134088	-0.044544	0.248665	0.338765	0.416673	0.0419942	-0.0432533	0.265924	0.153535	-0.247255
DERPC_P0CG12	-0.13784	-0.070851	0.0101109	0.0129696	0.0421286	0.0370957	-0.132315	0.0132516	-0.196074	-0.0516043	0.164734	-0.00904537	0.0258064	-0.0186807	-0.00197183	0.00196913	-0.00533563	-0.104221	-0.16361	-0.0497	0.00287294	-0.0871323	-0.408675	0.0230327	0.111187	0.333541	-0.00287867	0.0521891	-0.0607453	0.0718603	0.187344	0.207512																	0.023881
COL15A1_P39059	-0.19381	-0.0863786	0.000244096	0.0542401	-0.0872848	0.102419	0.118285	0.381696	-0.0801446	0.0288	-0.131442	-0.000244137	0.143979	-0.115728	-0.120403	0.0589056																	0.00329181	0.0747662	-0.0579957	0.0530585	0.0226256	-0.0396007	-0.165379	0.129347	-0.330014	-0.0589544	-0.213934	-0.00329934	0.0655314	0.142792	-0.0413581	0.0511367	-0.105845
TARS2_Q9BW92	0.036435	-0.0323228	0.00654758	0.0493973	0.0328027	0.0024257	-0.0737402	-0.0878388	-0.0297114	-0.00242979	0.0118996	0.0634775	0.00705772	-0.0936088	-0.0125893	-0.0236092	0.15626	0.0795042	0.059691	-0.0520879	-0.0522587	-0.0505444	0.0993629	0.128957	0.0697395	0.0282168	-0.0260349	-0.111027	-0.223838	-0.122409	0.0255734	-0.0292373	0.0613783	0.0545159	0.0454095	0.122269	0.00869396	0.040679	-0.00544236	-0.00630392	-0.0712571	-0.0331491	0.00542191	-0.00978067	0.00840508	-0.0544717	-0.0512247	-0.0302253	0.0699128
ZNF593_O00488	-0.298684	-0.21038	0.00052184	-0.243997	0.00494466	-0.0933035	-0.000522028	0.283586	-0.0053023	0.0626747	0.0823253	-0.127734	0.0506756	0.0712019	-0.0573726	0.0603645	-0.442934	-0.165971	-0.21295	-0.066567	-0.00605737	0.0717982	-0.0321933	-0.07862	-0.0631795	0.00603204	0.178787	0.223361	0.25974	0.143414	0.111322	0.195127	-0.101105	-0.227201	-0.0927926	-0.483251	-0.074018	-0.0239923	0.0120355	0.209863	0.00715331	0.246403	0.390427	0.286742	-0.00718895	-0.0484012	0.34319	0.231124	-0.232116
C11orf24_Q96F05	-0.302881	0.0865898	0.260432	-0.268415	-0.0619079	0.320218	0.112431	-0.433129	-0.0775721	-0.461319	0.31144	0.0531711	-0.0808362	-0.0404632	0.0448074	0.0393592
MACROD1_Q9BQ69	0.0601738	-0.0355515	0.0938865	0.227101	0.122371	0.0843824	-0.187651	0.0157368	-0.281361	-0.223295	-0.0159104	0.182237	-0.0338362	0.0914699	-0.0513922	-0.170798	0.300826	0.0540275	0.265213	0.0992949	0.2076	-0.0420798	-0.081085	0.136193	0.229419	-0.226381	-0.0956735	-0.129459	-0.251445	-0.113311	0.0408871	-0.154819	-0.0280468	0.14894	0.00331497	0.111337	0.314834	-0.142174	0.00788813	-0.00841097	0.0996161	0.272417	-0.0231086	-0.00332261	0.0335028	-0.11185	-0.136017	-0.151942	-0.197266
PSMB1_P20618	-0.118673	-0.114676	-0.0594861	-0.0330586	-0.00354018	-0.100478	0.00590855	0.0402121	0.0193246	-0.00916475	-0.0428664	0.00353152	0.0265247	0.0131484	0.0744355	0.032707	-0.212624	-0.232561	-0.000688935	-0.145549	-0.02288	0.0928085	0.142428	0.123551	-0.219904	0.0726849	0.24495	0.0600781	0.000688606	-0.147751	0.0830434	-0.233981	-0.0691851	0.0194641	0.00535304	-0.0654118	-0.012593	-0.023961	-0.0402473	-0.0458486	-0.00537297	0.0128054	0.0344471	0.0835698	0.0262684	-0.0220683	0.0273452	0.038958	-0.105307
PEX7_O00628	0.097052	0.106342	-0.123757	-0.0544312	0.0431967	-0.133866	-0.0173197	0.21868	0.298249	0.132206	-0.251909	0.0171142	-0.227081	0.0425036	-0.334696	-0.40822	0.0340753	-0.0217996	0.0702354	0.0394222	0.0470646	-0.020313	-0.00198807	-0.0472547	0.0618115	-0.0612274	-0.0601611	0.105966	-0.0511141	0.0401303	-0.0228191	0.00198533	-0.0200744	-0.0515813	0.0637679	0.0357532	0.107601	-0.0375085	0.0295071	0.0857832	-0.088344	0.0767092	0.0578561	-0.0107676	0.0106878	-0.0713525	-0.0118283	-0.0339868	0.0559573
RPA1_P27694	0.0785139	-0.041718	0.079169	0.0558418	0.0650331	0.0616603	0.0490205	0.00971486	-0.0329508	-0.0135388	-0.00997177	0.0155549	-0.0196951	-0.025263	-0.0547291	-0.00978072	0.0870712	0.0496924	-0.0895255	-0.0874662	0.126313	0.0852685	0.0419318	-0.00324322	0.0621181	0.00323594	-0.0774575	-0.0814698	-0.111174	-0.094095	-0.0460703	0.00668347	0.0374835	0.0509684	-0.0012362	-0.00710519	0.0493951	0.00123514	-0.0133111	0.0484109	-0.0248356	-0.0430203	0.0698571	0.00233292	0.0268999	-0.00418047	-0.0377636	-0.0237766	0.0122019
PDSS2_Q86YH6	0.133326	-0.107027	0.111733	-0.0585074	0.0279247	0.0820543	0.0946545	0.0589087	-0.0568042	-0.0718337	-0.0522423	0.00131837	0.150263	-0.00131957	-0.035686	-0.0953949	-0.0239991	-0.0883011	-0.0514145	-0.025362	-0.105858	0.187048	0.0716444	0.0236064	0.0286851	0.165254	0.080081	-0.0450126	0.0758205	0.119923	-0.0392558	-0.0985522	0.0468821	-0.00924846	-0.00850911	0.112074	0.105966	-0.00172798	0.152717	0.215228	-0.0873514	0.000333761	-0.0561533	-0.0590893	0.0273403	0.160269	-0.000333838	-0.105412	-0.0175708
HMGN5_P82970	-0.0573261	-0.10184	-0.0432238	-0.0120143	0.0180154	-0.058367	0.007609	-0.0597993	-0.00764934	0.0175147	0.0416538	0.0902694	0.0513092	-0.0119537	0.0400315	0.0119472	-0.00642588	-0.00431866	-0.0396435	0.00430577	-0.024591	-0.0124275	-0.0432142	-0.00876672	-0.0105237	0.0444441	0.0808962	0.130194	0.0949408	0.0566158	0.0138765	0.0294862	0.0219464	-0.0564786	-0.00489221	0.0420338	0.0269167	-0.0267658	-0.0201972	-0.090045	-0.000136571	0.000136558	-0.0690329	0.004405	-0.0142427	0.0863242	0.0477867	0.0292708	0.051441
HMGN5_Q5JSK9	0.144364	-0.152856	0.0348942	0.0247875	-0.0618206	0.133086	0.0802971	-0.18815	-0.0257974	-0.0252209	0.0887727	0.0452654	0.0645829	-0.039652	-0.0722772	-0.038313	0.359197	0.260717	0.324263	0.313818	0.00299948	-0.00300573	-0.122396	-0.131816	0.356103	-0.248259	-0.336616	-0.00816507	-0.271334	-0.0377622	0.151374	0.0328723	-0.147907	-0.294659	-0.198834	0.0239736	0.0562902	0.0932099	-0.109323	-0.131149	-0.12806	-0.0185593	0.411974	0.247192	0.0183236	0.0925277	-0.0844023	0.0475141	0.185108
GAK_O14976																	-0.102072	-0.00295543	0.330358	0.122319	-0.0248797	0.00486261	-0.0262607	-0.118334	-0.148743	-0.114764	1.02613	0.87396	0.166617	-0.127118	0.217365	0.00294939	-0.0906363	-0.329291	-0.0380629	-0.101709	0.0370844	0.153131	-0.0715728	0.13768	-0.167352	0.122109	1.29817	1.23099	-0.22111	-0.197676	1.18417	1.09	-0.232185
OPA1_O60313-2	0.0353129	-0.0410595	0.0632212	0.027033	0.0609217	0.0799977	0.00149757	-0.046136	0.0324217	-0.028272	0.023446	-0.00306439	-0.00149913	-0.016905	-0.0708375	-0.0374669	0.062472	0.0477823	-0.0877862	-0.0519056	0.0376311	0.0280627	0.0510139	0.0878673	0.0539701	0.0421513	-0.271152	-0.422292	-0.0286194	-0.0973844	-0.0844439	-0.0784993	0.0610199	0.0567776	0.0335386	0.0741579	-0.0135218	0.0685325	0.027522	0.0417053	0.00214695	-0.0328856	-0.00215015	-0.00404383	-0.0184346	-0.0560977	-0.0433168	-0.050576	0.0831439
CYB5R4_Q7L1T6	0.00989064	0.00821401	-0.0550021	0.0525013	0.00914087	0.0158429	-0.00968471	-0.0778894	0.0416331	-0.00826104	-0.0341446	0.0136817	0.0222207	-0.0961657	-0.0531379	-0.10909	0.122083	0.0803661	0.0209292	0.0312359	0.0845188	-0.0948833	-0.0775069	-0.0532528	0.064836	-0.0771392	-0.121882	0.00011309	0.0365811	-0.0476502	-0.000258525	-0.000113099	-0.0282778	0.0423539	0.0194009	0.0471713	0.0615698	0.0351233	0.0211146	0.0087406	0.000386547	-0.0434661	-0.0322446	-0.0501943	-0.0155416	-0.0479687	-0.00038665	-0.00136586	0.0994357
GLRX5_Q86SX6	-0.106967	0.0642858	0.0274743	0.0449929	-0.00617929	-0.0251603	-0.235468	-0.0680047	-0.0974113	-0.0139038	-0.0912902	0.0957011	0.00615293	0.094872	0.0887973	0.0971896																	-0.159113	-0.00591526	-0.103487	0.259841	0.424505	0.00905744	-0.00717563	0.0149928	-0.404298	0.00754856	-0.104672	-0.0817322	0.060323	0.0058911	-0.129031	0.102733	0.0148341
FLNB_O75369-8	0.00860976	-0.0266367	-0.00891282	0.0377227	0.0254017	0.020477	0.0106939	-0.0607426	-0.0292806	-0.0149984	0.0137767	0.0218652	0.00528081	-0.0473585	-0.00530021	-0.024661	0.100769	0.0646071	0.0918954	0.0320132	0.0244683	0.00041055	-0.00111428	0.00808193	-0.000410667	-0.0145111	-0.000480087	-0.0345701	-0.0257757	-0.033625	0.020323	-0.0331799	0.0746993	0.0563962	-0.0291083	0.0135934	0.0267194	0.0940437	0.038135	0.0329959	-0.0137671	-0.0181293	-0.0452636	-0.0537096	0.00268092	-0.00268591	-0.0467037	-0.0119186	0.0326465
FLNA_P21333	0.00316431	-0.0765801	0.0338317	0.00447476	0.0313554	0.00612557	-0.000632768	0.0217638	-0.0957478	-0.0965156	0.000632491	0.00957347	-0.119354	-0.102599	-0.131863	-0.0885448	0.101207	0.0397694	0.0609414	0.000867577	0.087419	0.0342787	0.0479025	0.0700406	-0.000868099	-0.0192281	-0.0953528	-0.145251	-0.000893605	-0.0884277	-0.0029611	-0.00554325	0.0535929	0.0271044	-0.0484894	-0.0583247	-0.0134707	0.0449888	0.00110031	0.0844661	-0.00348715	0.0154019	0.0571231	0.0227701	-0.00110115	-0.0157367	-0.0117525	-0.0222031	0.0927408
FLNC_Q14315	0.0483319	-0.0495817	0.00422368	0.0204174	0.0231389	0.026393	0.00728624	-0.0552545	-0.0441407	-0.0076251	0.0311101	0.0409002	-0.00423608	-0.0159656	-0.0162693	-0.0109546	0.0535178	-0.00595511	0.0294825	-0.0439942	0.010293	0.00504	0.00287442	0.0328443	0.0131527	-0.0398109	0.0293784	-0.0399771	-0.0454835	-0.0526489	-0.00288015	-0.0422138	0.0363345	0.0245932	-0.0225655	-0.0021269	0.00467047	0.0511641	0.0211233	0.0215194	0.00236595	-0.0317273	-0.0142101	-0.0323745	-0.00782716	0.00131387	-0.0459807	-0.00131507	0.04884
ASPSCR1_Q9BZE9-2	-0.0718104	0.51943	0.03951	0.0767861	0.0166195	-0.0542648	-0.0674106	0.113005	-0.0881202	-0.0866526	-0.00154318	-0.0291357	0.00154153	0.0320357	-0.106	0.0233988	0.00327566	0.0202748	0.0040547	0.00398075	-5.09878e-05	-0.0026793	0.0440815	0.104648	-0.0187712	-0.0915597	0.0801717	-0.000618928	-0.0268873	-0.0603188	-0.0208671	5.0986e-05	-0.0181292	-0.0392906	-0.0481271	0.00277727	-0.0342861	-0.00278262	-0.0289087	-0.026211	-0.00410448	0.0318997	0.120851	0.0408646	0.0375175	0.0314871	0.04348	0.045644	0.0833689
SEPSECS_Q9HD40	-0.0560686	-0.0788467	0.0877906	0.034818	0.00195949	-0.0661933	0.0577769	-0.0268323	0.0507219	0.0669668	-0.00483383	0.0259132	-0.00196215	-0.0535179	0.0606265	-0.00295813	-0.163373	-0.0413633	0.123352	0.033132	0.0106239	-0.102552	-0.0740181	0.00192369	-0.00794953	-0.00336715	-0.00192626	0.176221	0.0111127	-0.140345	0.0764287	0.0516068	-0.0274072	0.0528835	0.0172182	0.0154578	-0.044187	-0.0357076	0.0159724	0.0150619	-0.04392	-0.0152209	-0.178234	-0.168282	0.0580434	0.0334947	0.0275271	-0.0284516	-0.106993
FIS1_Q9Y3D6	-0.00576797	-0.0920825	-0.0320048	-0.0222639	0.00897128	0.023295	-0.0449222	-0.12938	-0.0323101	0.0311539	0.005745	0.0431163	0.0377102	-0.0325137	0.0746202	0.0193038	0.0875095	0.0142602	0.108169	0.0333234	0.0111193	-0.064795	-0.0492686	-0.0187599	-0.0112056	-0.0156024	-0.0648822	-0.0859338	0.0418881	0.0228542	-0.0342085	0.049944	0.193439	0.245206	0.227052	-0.00586906	-0.0879669	0.129849	0.162756	0.143666	0.0850807	-0.0224109	-0.369745	-0.201423	-0.0269221	0.00584528	-0.00735024	-0.212441	-0.328695
MRPL2_Q5T653	-0.0448022	-0.252544	-0.00604812	0.00602287	0.0983309	-0.161021	0.160647	0.20404	0.0502901	-0.0445584	0.0445069	-0.034688	-0.130602	-0.00760576	0.0115622	0.0165008	-0.33665	-0.0111277	0.0332192	-0.0131585	0.105758	-0.0200667	0.134907	0.0775749	-0.109056	-0.142591	0.065818	0.0914221	0.0143021	0.0110425	-0.0261395	-0.0413808	-0.109351	-0.0625812	-0.00175644	-0.196024	-0.0959717	-0.143136	0.0134253	0.175168	-0.0175664	0.087144	0.337873	0.197072	0.0017543	-0.0528636	0.115254	0.112232	-0.0887948
JAGN1_Q8N5M9	-0.157227	-0.10129	-0.0587348	-0.00285268	0.00284705	0.02406	0.00847641	-0.131327	-0.131302	0.0245974	-0.0421072	0.0862526	0.0437273	0.0152887	0.0758537	-0.014283	0.0250421	-0.228662	0.0355256	0.0627279	-0.282946	-0.13012	-0.296973	-0.00630366	-0.193902	0.161181	0.0935284	0.035595	-0.197934	0.0975282	-0.215974	0.00627623	-0.17339	0.0227257	0.111062	0.025059	0.153211	0.115902	0.0289199	0.00188069	-0.566149	-0.0933122	-0.0557326	-0.102235	-0.0352584	0.0899199	-0.181542	-0.00188315	-0.130177
TATDN3_Q17R31-3	-0.0848388	-0.136516	-0.0197046	0.0123022	0.0451427	-0.0115006	-0.0480269	-0.0539461	0.0392285	0.0126271	0.0341803	-0.0108797	0.0930559	-0.0518587	0.0730509	0.0107982	0.0650251	-0.177229	0.188427	0.0192012	-0.0154078	-0.0180972	0.126657	-0.0940592	0.0439446	-0.046452	0.015245	0.221293	-0.148413	-0.0269501	0.128262	-0.0660859	-0.121488	-0.0856993	0.00594477	0.0922563	0.113042	-0.108247	-0.0843604	-0.205777	-0.0559033	-0.0160284	0.157611	0.104396	0.0779487	-0.00596937	0.014473	0.064767	0.0628573
MOCOS_Q96EN8	-0.0637739	0.0179104	0.00510629	0.118231	0.0415705	-0.0407481	-0.00783566	-0.0540165	-0.0131733	-0.0177755	-0.00643186	0.0628145	0.0670194	-0.00512442	0.0893081	0.0278709	0.0935913	0.0189054	0.0240396	0.00770262	0.0678666	-0.0485749	-0.0111417	-0.0404762	-0.00774397	-0.0351598	-0.0125245	0.0314594	0.0218194	0.00851768	-0.0143959	-0.0669012	0.0309679	-0.0245397	0.03913	0.0284822	0.0525366	0.01436	-0.0145044	-0.105846	0.0173767	0.0161717	-0.0767623	-0.0866459	0.0582403	-0.0282457	-0.216175	-0.156304	0.0325975
RPLP1_P05386	-0.669213	-0.281809	-0.0338283	-0.206185	-0.0731932	-0.407625	0.0866565	0.693758	-0.0228055	0.0988919	0.0961003	0.055834	-0.206591	0.290982	0.0224506	0.294823	-0.968628	-0.246084	-0.167051	-0.0612098	-0.265794	0.0587181	-0.25865	0.0776822	-0.394978	-0.0937122	0.558261	0.633669	0.370886	0.330736	0.286584	0.57961	-0.513671	-0.295686	-0.0586344	-0.710579	-0.345982	-0.432288	0.0563442	0.328826	-0.571257	0.551409	0.458943	0.548699	-0.16306	0.561416	0.376636	0.368363	-0.358718
RPLP2_P05387	-0.437236	-0.299707	-0.0606023	-0.241664	-0.0938877	-0.324252	0.0699342	0.622914	0.179391	0.151352	0.0130282	-0.0131469	-0.17885	0.236202	0.0159383	0.268551	-0.790573	-0.275869	-0.239163	-0.0783105	-0.122195	0.0645809	0.0401543	-0.041304	-0.188038	-0.0702333	0.357521	0.402495	0.42774	0.326537	0.19425	0.43965	-0.404404	-0.307238	-0.235353	-0.598184	-0.407905	-0.369737	-0.0431794	0.318461	-0.0291637	0.402126	0.550261	0.567088	0.0336121	0.0285858	0.53005	0.338034	-0.462322
PPP1R9B_Q96SB3	-0.273857	-0.439197	-0.0994873	0.0061031	-0.0542112	-0.117454	0.0956691	0.152675	0.0341513	-0.0287011	0.179112	-0.0743528	-0.00612902	0.290018	0.260641	0.22705	-0.152457	0.0470139	-0.139075	-0.059959	0.0431777	0.263032	0.0200392	-0.218413	0.0156741	-0.124033	-0.0896587	0.0261822	0.107245	-0.0158463	0.103442	-0.151083	-0.354794	-0.180055	-0.225368	-0.38579	-0.142498	-0.283544	-0.155081	0.0510803	-0.00470718	0.00469187	0.122993	0.117131	0.0183026	0.0703035	0.192151	0.0647432	-0.228032
PPP1R9A_Q9ULJ8-3	0.104724	-0.000676738	-0.095606	-0.122118	-0.134519	-0.0395897	-0.0634438	0.0457436	0.0810514	0.0108409	0.195687	0.000676421	-0.101854	-0.170228	0.161438	0.191385																																	-0.148628
RUVBL2_Q9Y230	-0.0404001	-0.094093	-0.0201197	-0.0212404	-0.0295185	-0.0394953	0.0643986	0.0239239	-0.0152805	0.008995	0.0115085	0.0362763	0.039295	-0.00905143	0.055144	0.0113384	-0.0420337	-0.114133	-0.0286618	0.0178714	-0.0766703	0.0241528	0.0668517	0.0269378	-0.0644952	0.0850598	0.208932	0.135712	-0.0414544	-0.0180955	0.0248905	-0.111884	-0.0456985	0.00528812	-0.0339113	0.00909511	0.0374288	0.0130206	-0.00530758	-0.0613357	-0.0496555	-0.0237657	-0.019832	-0.0180861	0.0385928	0.0172948	0.0580156	0.0189666	-0.0914922
PCBD2_Q9H0N5	0.0232781	-0.131666	0.0148102	-0.00474276	-0.0388973	0.0538999	0.0302721	-0.0688553	-0.034835	0.0507674	0.00226809	0.0299734	-0.0103654	-0.00227166	0.0293556	-0.0123213	0.0662159	-0.0362001	0.0801475	0.0306804	-0.0182532	-4.38965e-05	4.38952e-05	-0.00496182	-0.00283985	0.0609987	0.00732813	-0.0161747	-0.0594511	0.0854811	-0.0594415	0.0137018	-0.159708	0.0501382	0.00808073	0.0712021	0.0594111	-0.00812624	0.0547254	-0.0534173	-0.13179	-0.0388689	-0.0426594	-0.0452722	0.0571079	-0.031386	0.0408167	0.0358628	-0.0590287
PCBD1_P61457	0.0402388	-0.0674505	0.061413	-0.00624403	-0.0101772	0.0131321	-0.0312866	-0.107843	-0.0226689	0.00164778	-0.0296098	0.0331058	0.0272391	0.0366396	0.0499006	-0.00164966	0.0595324	0.114748	0.00426077	0.0661596	-0.0151891	-0.0410695	-0.00427339	-0.0371744	-0.0361833	0.077596	-0.0626826	-0.147276	0.0441924	0.084789	-0.0247188	0.076024	-0.185589	0.00904874	0.0552711	0.0346993	0.0743299	0.0631522	0.000356217	-0.118714	-0.285691	-0.1749	0.00982992	-0.185033	-0.000356305	-0.0515129	-0.0102062	0.0317587	-0.147136
DUT_P33316	0.0463692	-0.0828155	-0.0262973	0.0169693	0.0314279	0.00332511	0.00111691	-0.0935398	-0.0496093	-0.00758275	7.38721e-05	-7.38759e-05	0.00821353	-0.000115433	0.00855322	-0.104064	0.021689	0.0370032	0.0646933	0.0411509	-0.0164076	0.003537	-0.0299531	0.0198663	0.0449109	-0.00142971	-0.0389755	-0.0727288	-0.0646977	-0.000704284	-0.0312618	0.00070394	0.0398288	0.0318729	0.0318593	0.068639	0.0362402	0.0125454	-0.00109005	-0.0539094	-0.0323875	-0.0793454	-0.0420479	-0.050728	0.00108923	-0.0156489	-0.0185901	0.00309477	0.120878
AKNA_Q7Z591																																	0.113483	-0.028932	-0.142334	-0.125706	0.371571	-0.230038	-0.101906	0.122309	-0.22377	0.160192	-0.195252	0.155745	0.384147	0.0283631	0.074047	-0.206753
RAB11B_Q15907	0.0201575	-0.0837107	0.0130668	-0.0197249	-0.0733668	-0.0104392	-0.0341172	-0.145342	-0.0402462	0.017917	0.027777	0.0366797	0.0103642	-0.0216464	0.0265499	0.0141227	0.0302835	-0.0103265	-0.0271006	0.00647988	-0.037472	-0.0840029	-0.0402735	-0.0679673	0.0145373	-0.00121635	0.0294632	0.0645316	-0.0152284	0.00594924	0.00121532	0.0432738	-0.0643033	0.0251642	-0.0523185	-0.00306476	0.0245201	-0.070206	-0.0106332	-0.10522	-0.062529	0.0246562	0.00305826	-0.0494697	0.0623326	0.0920411	0.0987592	0.0633575	-0.0424209
RAB11A_P62491	-0.106314	-0.12418	0.0566112	-0.0210296	-0.000158986	-0.0224055	-0.0100458	-0.0581502	0.000158968	0.026636	0.0508625	0.0285144	0.082765	0.00674365	0.0259614	-0.00539325	0.30297	0.208011	0.158525	0.155523	0.00497194	-0.218683	-0.177678	-0.246383	0.0249319	-0.149971	-0.23289	-0.0417944	0.157106	-0.00498913	-0.0467123	0.229125	-0.0694738	0.0521636	-0.0103894	0.0793752	0.00987032	0.141916	-0.0468933	-0.0577371	0.0113701	0.07328	-0.117007	-0.0647983	-0.00993832	0.028123	-0.051172	0.0315807	-0.0379532
CHMP4B_Q9H444	0.00513879	-0.0963818	0.00642522	-0.0035031	-0.0159375	-0.0457509	-0.0369145	-0.118932	0.00349462	0.00593835	0.0774396	0.036621	0.0150651	-0.0639059	0.00590619	-0.0360771	-0.00528563	-0.0761921	-0.102652	-0.0856133	0.030757	0.0180099	0.0897428	0.0321539	0.00526633	0.0909322	0.0126356	-0.0790691	-0.102286	-0.0480871	0.0151689	-0.145471	-0.00844545	0.0267111	-0.00600922	0.0309794	0.0337691	-0.0418731	0.0173982	-0.0471633	-0.0293506	-0.0190425	-0.0389058	-0.00443516	0.0466106	0.0609848	0.0293915	0.00442156	0.00275355
CHMP4C_Q96CF2	-0.0465861	-0.0872944	0.0379592	-0.0169848	0.01454	0.0408173	0.0201503	-0.0404911	-0.0146881	-0.0231079	0.212816	0.0561823	0.0342673	-0.0774437	0.0274245	-0.0307413	0.0705152	0.00164218	0.032584	-0.0419856	0.0409398	-0.000936254	0.000935647	-0.00593758	-0.032533	0.0708695	-0.0543846	-0.123616	0.0714832	0.0737796	-0.0153384	-0.0517041	0.140784	-0.121727	-0.105343	0.0891491	0.153876	0.18492	-0.0048543	-0.0509594	-0.0918004	-0.0523175	0.115644	-0.121523	-0.074293	0.133798	0.00483802	0.0356061	0.0367938
IPO4_Q8TEX9-2	-0.00538961	-0.0846819	0.0916353	0.0412071	0.0502935	-0.000350808	0.00120691	0.128758	-0.0238101	0.000350722	0.0547006	0.0851196	-0.0907616	-0.0378742	-0.0505245	-0.0212185	-0.023583	0.00543298	-0.0362624	-0.0317489	0.0851731	0.0891377	0.0379622	0.0677631	-0.043009	0.058633	-0.171988	-0.131579	-0.00507707	-0.0419908	0.00505927	0.0734556	0.0203461	-0.0529159	-0.143073	-0.177626	-0.068513	-0.0324899	0.00190422	0.132456	-0.0422149	0.125119	0.115331	0.118644	0.0201612	-0.00190674	0.031754	-0.0285384	0.00965705
CDC23_Q9UJX2	-0.0696476	-0.146495	0.0142764	0.0123142	0.00119675	-0.0944745	-0.0321491	0.0490086	0.000433719	-0.00043385	-0.0288221	-0.0202893	-0.0485077	0.482386	0.753842	0.0805786	-0.11096	0.0674113	-0.00752348	0.00748445	0.0236312	-0.0140593	-0.0190205	-0.0571422	0.0467662	-0.0387359	-0.0416881	0.100382	0.0412684	-0.0285224	0.0446839	0.0326746	-0.0235696	-0.0176978	-0.0514596	-0.0534269	-0.0436934	-0.0108728	0.072079	0.0757957	0.151703	0.0107914	0.0758374	0.0836198	0.0216782	-0.0678484	-0.0488319	0.0562215	0.043966
TACC1_O75410-2	-0.0117574	-0.0562543	0.0174059	0.0399791	0.0116623	0.0135542	-0.0328388	-0.105811	-0.0235503	0.0123832	0.0302041	0.0702938	0.0297	-0.0981996	-0.0348186	-0.0239022	0.0886042	0.0232527	0.0125262	0.047784	0.00439535	-0.0485425	-0.0162186	-0.0246333	0.0155202	-0.0789648	-0.047643	0.00241766	-0.00242172	-0.00928045	-0.0307922	0.0122265	0.0243412	0.00480138	-0.00639511	0.0457364	0.0474591	0.031241	-0.0238084	-0.0267629	-0.0659763	-0.0279765	-0.00481741	0.0153752	0.0396288	-0.00572073	-0.0453371	0.0137325	0.0781687
TACC2_O95359	0.00163626	0.00092929	0.0509657	-0.0271566	0.0552206	0.0223648	-0.000929889	-0.087749	-0.0606998	0.0196437	0.0860992	0.0643079	-0.0435625	-0.0719267	-0.00312282	-0.0596631	0.137087	0.0187104	0.101014	-0.00945631	-0.0789684	0.0121444	0.0117683	0.00939473	-0.0387159	-0.0225244	-0.0555766	-0.0319692	-0.206745	-0.100728	0.0481974	0.0331576	0.135844	0.0501083	-0.0275313	0.0260713	0.00123199	-0.0614934	0.0438477	-0.0507182	-0.0563506	0.010171	-0.00123304	-0.0252516	0.016954	0.082544	-0.114436	-0.0535353	0.00208313
NCAPD2_Q15021	0.0280633	-0.0536615	0.0375722	0.0216935	0.0242221	0.0216867	-0.0220177	0.0811239	-0.0843636	-0.089088	0.0378171	0.0421398	-0.0790382	-0.0539991	-0.103974	-0.0518937	0.0817429	0.0250111	0.0771483	0.040923	0.0698083	0.0465322	-0.00537548	0.0961709	-0.0955518	-0.0792989	-0.131477	-0.0644637	-0.0317309	-0.121761	-0.00320809	0.00320097	0.0858242	-0.00771886	-0.00903644	-0.0618579	-0.000482086	0.0809483	0.000481925	0.12189	-0.0520575	0.0115403	0.0977655	0.0884165	0.0317871	-0.0178916	-0.0246698	-0.0326188	0.0852982
STXBP2_Q15833-3	0.0459341	-0.0219799	0.130044	0.00688368	0.117019	0.0740845	0.00586338	0.16947	-0.00636697	-0.10041	0.0102281	-0.0186455	-0.10756	-0.0058873	-0.212322	-0.0876754	0.0229091	0.0553776	-0.0426331	-0.13892	0.175224	0.0351437	0.0817783	0.110355	-0.0232788	-0.103873	-0.110324	-0.0330718	0.03752	-0.0970301	-0.0999395	0.0500999	-0.0115381	-0.0235639	0.107739	0.039044	-0.0923581	-0.00767987	-0.126576	0.0402058	0.408218	0.0275593	0.0308426	0.0474886	0.0076392	-0.0674478	-0.0936886	-0.131485	0.0234727
PA2G4_Q9UQ80	0.00472643	-0.0912516	0.0236988	-0.00474197	0.0600113	0.0478523	0.0903849	0.0970131	0.0169612	-0.0162347	0.0293754	-0.00641988	-0.024172	-0.0252015	-0.0526852	-0.0445258	-0.00081289	-0.0158454	0.016649	0.00950729	0.014973	0.0252515	-0.00401818	0.0472233	-0.0277375	-0.0403092	0.0132173	0.000812432	0.0352053	-0.00282113	-0.075259	-0.0814269	0.0633535	0.0110776	0.0834171	0.0413478	-0.049382	0.0606172	0.0166125	0.0673943	-0.00183051	-0.0331672	-0.0472555	0.00182819	-0.0617523	-0.0901419	-0.0285838	-0.0422355	0.0352773
EDRF1_Q3B7T1	0.0744207	-0.160387	-0.0210604	-0.0512593	0.0104702	-0.00166529	-0.00439384	-0.0752744	0.00166337	0.0916103	-0.0486977	0.0152371	0.0647856	0.0703895	0.0890047	-0.00239984	0.330108	0.0012135	0.284996	0.202022	0.343946	-0.177514	-0.409923	-0.00759651	-0.0840882	0.135415	-0.208193	0.179269	-0.0731703	0.26994	-0.00121452	-0.0903318	-0.0678468	-0.220916	-0.241993	-0.307546	0.424838	0.0647989	0.42819	0.40885	-0.584424	0.6319	0.159965	-0.176511	-0.244006	0.122142	0.151189	-0.163984	-0.042978
CTH_P32929	-0.00412092	-0.0994183	-0.0439968	-0.0214587	0.00968041	-0.0130505	0.00961642	0.0467521	0.154046	0.0403518	-0.0108257	0.0122242	0.0254277	-0.00668904	0.00410918	-0.0519748	0.0281413	-0.0826982	0.00237251	-0.00107259	-0.0617695	-0.0597225	0.0295216	-0.00741389	0.00541289	0.0436024	0.044533	0.0128662	-0.118723	-0.0663926	0.00107179	-0.0466001	0.00463677	0.00672459	0.0478944	0.00216691	0.0102608	0.0277408	0.0152097	-0.0433067	-0.0134476	-0.0322084	-0.149409	-0.0568273	0.00440052	-0.0169447	-0.00217017	-0.0463803	-0.101308
FXYD5_Q96DB9																	0.39166	0.147796	0.603265	0.404396	-0.0889908	-0.171197	-0.375658	-0.375178	-0.142867	-0.162771	-0.410082	0.24969	-0.0539485	0.419744	0.0520036	0.380001	0.0370573	0.200978	-0.113676	0.164044	0.375084	-0.0215557	-0.134235	0.120798	-0.0529332	0.190007	-0.184812	0.0516838	0.0212383	-0.287841	-0.750446	-0.227393	0.0171839
CCT2_P78371	-0.0051385	-0.0910438	0.00231478	-0.0438878	0.00359047	0.0109096	0.0244191	0.0293722	0.0293948	0.00679773	0.0103232	-0.0303526	-0.0273841	-0.00662823	-0.0023185	-0.00819143	-0.00815314	-0.0359778	-0.0296211	-0.0514778	0.0160199	0.0255201	0.0193181	0.0230243	0.0464993	0.00810732	-0.0400928	-0.00843162	-0.0319877	-0.0251084	0.0436658	0.0184002	-0.00987132	0.0185529	0.0135076	-0.0175351	-0.0162908	0.0215293	0.0205356	-0.000940574	0.00149788	-0.00892142	-0.0436131	-0.0314334	-0.000557346	0.00863954	0.0200828	0.000557131	-0.000628905
STXBP1_P61764	-0.00869713	-0.0704448	0.061825	-0.000259327	0.0853101	0.00506438	0.195201	0.0107725	-0.0898145	-0.0473586	-0.117849	0.00025928	0.154435	0.0988481	-0.0704179	-0.14196	0.138934	0.100107	0.054214	-0.0196602	0.170196	0.0917557	0.0367932	0.113359	0.0193959	-0.104739	-0.36564	-0.264533	-0.124066	-0.22328	-0.134589	-0.0928148	0.096651	0.0421155	0.118128	0.135663	-0.0938692	0.0407393	0.0329523	0.155974	-0.147385	-0.15598	-0.000820004	0.000819538	-0.105126	-0.149906	-0.0640902	-0.167604	0.0200141
SMU1_Q2TAY7	-0.0567404	-0.113754	-0.00314855	-0.0237951	0.00138282	0.0384421	0.0818552	0.0503017	0.00707298	-0.0122356	0.0817528	0.0193992	-0.0562416	-0.0729113	-0.00138415	0.0260609	0.0771056	-0.0598531	-0.0813555	0.0732644	-0.0405151	-0.0278691	0.000996916	0.0377201	-0.126821	0.133777	-0.00744966	0.0120104	0.0587842	0.022491	-0.0742616	-0.000997606	-0.00585709	0.0436729	-0.118092	-0.0365117	0.060135	-0.0263806	0.0179971	0.0253814	0.00583341	-0.0444655	-0.0336058	-0.0252187	0.0461606	0.0520687	-0.0566756	0.0177716	-0.00511873
SMU1_Q2TAY7-2	-0.650629	-0.249836	-0.0226954	-0.136432	0.183702	0.105421	0.217302	0.153509	0.202961	0.150774	0.240708	-0.118695	0.0223439	-0.562377	-0.324408	-0.088911
SUPV3L1_Q8IYB8	-0.029291	-0.0473985	-0.0078945	0.0644227	0.043702	-0.000620985	-0.0123836	-0.0727574	0.000825645	0.029469	0.000620717	0.0447432	0.0232009	-0.00888392	0.0240666	-0.00644751	0.0173619	0.00887191	-0.00782154	0.0109494	0.0109242	-0.0242113	-0.0492125	0.0158839	-0.0138354	-0.031113	0.0181128	-0.00824084	-0.0320078	0.0396634	0.00777936	-0.0162517	-0.0564998	0.0733616	-0.0943682	-0.0137691	-0.00978125	-0.0252085	0.0236112	-0.0266486	-0.00641511	0.0458706	0.00638671	-0.125891	0.0465421	0.100538	0.129287	0.00902187	-0.0317193
TAF15_Q92804	-0.096043	-0.149077	-0.180654	-0.106681	-0.0569059	-0.157695	0.0116557	-0.0380683	0.0524859	0.0308036	0.013623	-0.0117507	0.0296947	0.158696	0.0786926	0.108557	-0.0777378	-0.0792588	-0.125827	-0.0159113	0.0207274	-0.0252866	-0.0693159	-0.0847987	-0.004969	0.0531835	0.0473776	0.0182599	0.0620063	0.0714479	0.00495195	0.0479333	-0.0126825	-0.0220321	-0.0867489	-0.185876	-0.0364381	-0.139084	-0.0267261	-0.0750312	0.0136139	0.0903553	0.0177235	0.076643	0.012572	0.0352693	0.116733	0.159963	-0.0555454
FUS_P35637	-0.0996716	-0.133215	-0.0995445	-0.0833323	-0.0575996	-0.126229	0.0169102	0.0762952	0.190863	0.0407782	-0.0154986	0.0153338	-0.0358849	0.119749	0.0279216	0.0658706	-0.188982	-0.131096	-0.061934	-0.130943	-0.0381579	0.0626411	-0.0543894	-0.131103	-0.0582222	0.0895786	0.160001	0.107507	0.0371746	0.0766792	0.101737	0.135704	-0.117215	-0.00509244	-0.134803	-0.0917888	-0.0812086	-0.114842	0.00507453	-0.0499885	-0.00921076	0.157635	0.0761539	0.148383	0.116735	0.0755512	0.176502	0.198942	-0.0759414
TDRD15_B5MCY1																	0.314935	0.342026	0.484584	0.289754	0.0396135	-0.277627	-0.226672	-0.273485	0.361015	-0.345351	-0.53436	-0.040732	-0.0882139	0.0719086	-0.0757138	0.374279	-0.168712	-0.246557	-0.248833	0.0687613	0.265122	-0.309207	-0.205909	-0.347952	-0.0745953	0.0609347	0.411552	0.223448	0.0634421	0.0940419	-0.0636223	0.256725	0.343641
MYH15_Q9Y2K3	1.22933	0.765199	0.348948	-0.122701	-0.210504	1.63216	-0.0901643	-0.51453	0.0848592	-0.286243	-0.110604	0.894132	-0.136922	1.66316	-0.134863	1.28282
SRP68_Q9UHB9	0.0187039	-0.0186762	0.0832506	0.0726325	0.0894281	0.00699923	0.0133353	0.0723431	-0.0170932	-0.0337998	-0.00703335	0.0262847	-0.0401452	-0.0337077	-0.0535928	-0.028719	0.0520546	0.0381906	-0.0638404	-0.0443423	0.0278769	0.13166	0.0257038	0.081409	-0.00316972	-0.0114977	-0.214485	-0.145286	0.0040254	-0.131385	-0.0508204	0.00316277	-0.00717819	-0.00265443	0.0035884	-0.0546547	-0.0407678	0.0853725	-0.0556754	0.141846	-0.0632861	0.0544061	0.163662	0.136825	-0.0246961	-0.0326376	0.0843527	0.00264955	-0.00928873
NOL12_Q9UGY1	-0.14309	-0.432451	-0.00909154	-0.259099	-0.00244314	-0.356906	0.00243901	0.364531	0.194736	0.193064	0.0577479	0.0888735	-0.0414612	0.146991	-0.012583	0.258112	-0.602973	-0.131368	-0.0386714	0.0310831	-0.0317676	-0.177116	0.076018	-0.0889465	-0.210242	-0.258473	0.430603	0.493949	0.38437	0.260176	0.0864399	0.468512	-0.24666	-0.481902	-0.220163	-0.449478	-0.174928	-0.252425	-0.0335821	-0.00345298	0.0975021	0.352581	0.396054	0.502575	0.0912111	0.00344473	0.460082	0.300494	-0.394531
PPP1R21_Q6ZMI0	-0.146659	-0.0068836	-0.0393715	-0.0255997	-0.0778949	-0.0861035	0.0243959	-0.378741	0.1128	0.0443525	-0.200416	0.127753	0.107583	0.00685091	0.0602215	0.0912232	0.0943216	-0.0876973	-0.193887	0.0122639	0.0487631	0.0375172	0.143789	0.0155031	-0.012369	0.108414	-0.172378	-0.168579	-0.0425774	-0.0615015	0.102002	-0.175234	0.0938529	-0.0231304	-0.0343138	-0.064893	-0.170371	0.302458	0.0904429	-0.052515	0.0161287	0.110446	0.141008	-0.0163111	-0.0458648	0.224546	0.228957	-0.429703	0.00737523
IARS2_Q9NSE4	-0.0080606	-0.0607624	-0.0235954	0.00873867	-0.0176226	0.0333419	0.00506326	-0.0451459	-0.00139595	0.0532433	-0.00467117	0.044998	0.0326177	-0.00549808	0.0360413	0.0013946	0.0033153	-0.0110381	-0.0701663	-0.00867466	0.0109475	-0.0170841	-0.00332294	0.0417357	-0.0153404	0.0745156	0.0792556	0.0237323	0.0064254	0.042917	-0.0230101	-0.00689241	0.0163423	0.0177656	-0.00136823	0.0174099	-0.0148028	-0.0192193	0.0211132	-0.0796637	-0.0393348	0.00136693	-0.0848954	-0.0607889	0.0129905	0.046961	0.012407	-0.0202606	-0.050733
EIF2AK1_Q9BQI3	0.0864598	-0.0327342	-0.104701	0.0707676	0.0263151	-0.0770116	-0.133001	-0.191304	0.0528249	0.0407057	-0.208434	-0.0193796	0.13428	-0.0991052	0.0191227	0.0305381	-0.127423	-0.134334	0.0609813	-0.355256	-0.147089	0.0320351	0.20644	0.135701	-0.0517254	0.0007462	-0.000746586	-0.164197	0.04759	0.225554	-0.0428934	0.111072	-0.023354	-0.0542224	0.158926	0.221892	-0.000346044	-0.0709066	-0.0896714	-0.0245611	0.0373831	-0.0349899	0.0862723	0.0028081	0.0834093	-0.04673	0.000345961	0.143537	-0.0261923
SLC12A6_Q9UHW9-2	-0.111305	-0.089741	-0.0672331	-0.0152004	-0.0274259	-0.106853	0.0409917	-0.0210304	0.0205262	0.0150419	-0.0381146	0.0306623	0.136875	0.0797087	0.096985	0.0658782	-0.054765	-0.000503071	-0.140464	0.0837893	0.0441274	0.0818418	0.0759092	0.013273	-0.0139354	0.014871	-0.0665097	0.0169633	-0.102462	0.000502896	-0.00537708	-0.061538	0.0230058	-0.00601841	-0.000294684	-0.0269227	0.0111308	0.0176332	-0.00881353	0.0122839	-0.0661759	-0.00509175	-0.0853907	-0.109755	0.000294624	0.0462302	0.00836642	0.00681387	-0.0323083
SLC12A4_Q9UP95	-0.0218984	-0.0332984	0.0704466	0.0615175	-0.0316364	-0.000948834	-0.00180713	-0.0638772	0.0371327	0.0883596	0.162078	0.141234	0.0579127	-0.115698	0.00094821	-0.00129717	0.0734476	0.0732964	0.0566444	0.150149	0.0635912	-0.0658675	-0.0868875	0.00580391	0.124675	-0.00582736	-0.272933	-0.0978057	-0.026245	-0.0428776	-0.0826414	0.0521805	0.00144569	0.013142	0.0299216	0.00194529	0.0757207	0.00508401	-0.00144714	-0.0222495	-0.00804043	-0.0282969	-0.0351631	-0.00177943	0.0374921	-0.0230198	-0.0852812	0.038774	0.00781935
SLC12A5_Q9H2X9	0.152535	-0.102542	0.0382154	-0.0459393	-0.0438362	-0.000141487	-0.0361365	0.0549968	0.000141473	-0.0667183	-0.0897618	0.0485885	-0.0384262	0.0256726	0.14092	0.0622545																	-0.0179951	0.0223343	-0.00614192	0.00954377	0.162233	0.0362547	-0.0207548	-0.131174	-0.103014	0.00611588	-0.0435911	0.0976619	0.0514012	0.0577169	-0.0922086	-0.0419402	-0.208413
APRT_P07741	0.0548757	-0.0909664	0.041162	-0.0198467	-0.00803881	0.0309868	0.00631615	-0.0963997	-0.00479705	-0.00641818	0.0151148	0.000358039	0.0121581	-0.000358128	0.0529529	-0.0072747	0.0646348	-0.0139237	0.0811145	0.0407174	0.00066288	-0.0506406	-0.0483358	-0.0742894	-0.0111133	0.00312926	-0.127184	-0.10518	0.0302879	0.0134244	0.0145889	-0.000663185	-0.0414922	0.00464414	0.0276194	0.0269552	0.0576963	0.0467475	0.042633	-0.0563189	-0.103291	-0.062735	-0.0305398	-0.0561508	-0.00465914	0.0140777	-0.00551926	0.0309178	0.00462687
TDRKH_Q9Y2W6	0.071715	0.0319431	0.0262539	0.0621635	0.0796922	0.0255656	-0.00117654	0.0217501	-0.0159221	-0.0197834	-0.0559238	-0.0820597	-0.0350721	-0.091043	-0.0305813	0.00117558	0.0589955	0.000356127	0.0262619	-0.0488524	0.0773958	0.0331291	-0.000356215	0.0462536	-0.0262353	-0.0101937	-0.137913	-0.0492089	0.067328	-0.00204596	-0.037312	0.0511862	-0.00681338	0.00348811	-0.0538565	-0.0307503	-0.00349656	0.0141472	0.0504181	0.148008	-0.0337942	-0.0497546	0.219522	0.110929	0.0388994	-0.0502455	0.0496139	-0.0392547	-0.0325813
EIF4G3_O43432-3	0.103497	0.0121105	-0.0106421	0.12816	-0.102496	0.140574	0.0499742	-0.0699165	-0.00891051	-0.0364452	-0.134591	0.0430696	-0.016957	0.0176075	-0.0517581	0.00885581																	-0.0611779	-0.137905	-0.100127	-0.0449468	0.00293191	0.0384953	-0.0870741	0.0911592	0.0150476	0.173326	0.0561055	0.0927772	-0.00293788	-0.1174	-0.0396004	0.00347939	0.0481012
EIF4G1_Q04637-8	0.0340615	-0.048292	0.0793154	0.0548898	0.079949	0.0141535	-0.0677714	0.0640789	0.00928384	0.0402551	-0.0884438	-0.0886006	-0.214635	-0.0814407	-0.13842	-0.00934397	-0.0417763	0.0170847	-0.247312	-0.291787	0.106706	0.126148	0.0388031	0.0523169	-0.0043986	0.00215689	-0.415979	-0.434672	0.0165059	-0.0806929	0.0122587	-0.00216012	0.0318397	-0.0165982	-0.119541	-0.191003	-0.0500427	0.0180691	-0.187028	-0.0541207	-0.00407535	0.0939407	0.118234	0.100745	0.0141457	-0.018381	0.0385357	0.00406387	0.0787159
EIF4G1_Q04637																	0.0431067	0.00223733	-0.204364	-0.409381	0.147125	0.0234224	0.00616964	0.0280322	-0.0246194	-0.00713216	-0.559669	-0.544894	0.0375685	-0.202282	-0.00224081	0.127118	0.0790579	-0.0482039	0.0583532	-0.121633	-0.0473896	-0.0163169	-0.205863	-0.0295233	-0.00247755	0.116937	0.161859	0.205716	0.0024733	-0.0584429	0.0794427	0.0151043	0.180971
GCLC_P48506	0.00895282	-0.0386586	-0.00159873	0.0576042	0.022021	0.101149	0.0145468	-0.0805062	-0.0348271	0.00159696	-0.0691291	0.00620048	0.0177457	-0.0147229	-0.0349381	-0.0466858	0.0513464	0.0618748	0.0931751	0.0723729	0.0956522	0.0331084	-0.0738451	0.00395919	-0.00397009	-0.104506	-0.0938413	-0.0197035	0.00645185	-0.0341954	-0.108684	-0.101816	0.0223275	0.0202101	-0.0380407	0.0345825	0.0454949	0.0297707	-0.0397153	-0.00320847	-0.0360393	-0.0716638	0.00558278	0.0206329	-0.0102157	-0.00799054	-0.0531303	0.00320135	0.0908258
CCDC91_Q7Z6B0	0.0370029	-0.0319181	-0.00613124	0.0622052	0.00422613	-0.00423855	0.0231834	-0.0735822	0.00677403	-0.00686861	0.0075435	0.0955467	-0.00668771	-0.020679	0.00621792	-0.0204659	0.0942671	0.0466474	0.0370074	0.0344155	0.0506267	-0.0218573	-0.0175095	-0.0379154	0.0115518	-0.0655448	0.00210712	0.00404199	-0.0217682	-0.0575471	-0.0021102	-0.0861932	-0.00879147	0.0115919	-0.126801	0.0111247	0.0245491	-0.000140815	-0.0377697	-0.0934587	-0.0902778	-0.0217389	0.0752359	0.0545361	0.000140801	0.0164976	-0.072015	0.0316032	0.0737496
EEA1_Q15075	-0.00530572	-0.0930077	0.00528628	0.0132521	-0.0172573	-0.010581	-0.00837717	-0.0778506	-0.00716171	0.0200052	0.0365158	0.0553395	0.0270891	-0.0233056	0.0318022	0.0123008	-0.00664824	-0.016976	-0.0110611	0.0108487	0.0366879	-0.0282414	-0.00730663	-0.0349387	0.016368	0.0395235	0.00702647	-0.00413565	0.00412383	0.0354413	0.0446527	-0.00673168	-0.0383156	0.00324246	-0.0401457	0.0108601	0.00554255	-0.035175	0.00468965	-0.0604494	-0.0268775	-0.00324976	-0.0532547	-0.0381995	0.0260506	0.0504633	0.0143616	0.0108739	-0.0372581
MYH14_Q7Z406-2	0.0691596	-0.0547582	0.0262572	0.0420896	0.0439401	0.0434171	-0.0131238	-0.104643	-0.00912508	-0.00615713	0.0355649	-0.0058458	0.0235351	-0.0369385	0.00582221	-0.0179697	0.0648825	0.0635636	-0.0285446	0.0476799	0.0756279	-0.0325526	0.0112905	0.04883	-0.0113795	-0.0503994	-0.0562069	-0.103252	0.0230422	0.0230672	-0.063732	-0.0300888	-0.0486801	0.0439255	-0.0538201	0.0469186	0.0168422	-0.0208858	-0.00154869	0.00233956	-0.0131833	-0.0854799	0.0899504	-0.113323	-0.0239971	0.0430881	0.00154703	0.00203692	0.0503814
MYH10_P35580-3	0.0134958	-0.0633801	0.0458396	0.0302892	0.0265774	0.0168729	-0.0102425	-0.0812631	-0.00055932	-0.00289792	0.0184915	0.00151575	0.000315241	-0.043658	-0.00031531	-0.0050394	0.00667551	8.85967e-05	-0.0144796	-0.0515176	0.00826664	-8.86021e-05	0.0218693	0.0441254	-0.0184553	0.0212663	-0.0477876	-0.10651	-0.0382707	0.0303692	0.0136338	-0.0849942	0.0551238	0.0498224	0.0358288	0.0767412	0.040976	0.044874	0.0156032	0.00670185	-0.019851	-0.0594347	-0.0204905	-0.0319148	-0.00673313	-0.0187992	-0.0314867	-0.0368712	0.0678591
MYH9_P35579	0.00512714	-0.0519161	0.0137381	0.00508801	0.0258161	0.0446976	0.0253465	-0.0464893	-0.0022905	-0.0114425	0.0363218	-0.00652513	0.00228687	-0.0709714	-0.0125999	-0.0420717	-0.0720465	-0.0623561	-0.085373	-0.119833	0.00560572	0.12422	0.0988576	0.100696	-0.00562759	0.0868673	0.0868303	0.0498694	-0.121113	-0.107001	0.0347761	-0.130942	0.079833	0.0747545	0.0401924	0.0772369	-0.00451977	0.0852594	0.0490102	0.0460113	0.00450566	-0.0680415	-0.126349	-0.0876143	-0.0482769	-0.0277949	-0.0590561	-0.0740459	0.00817311
MYH2_Q9UKX2	-0.0772476	-0.0287186	0.538988	-0.00665151	0.00662098	0.0622418	-0.212104	-0.0948647	3.79453	0.0881185	-0.423691	0.217956	-0.0136916	-0.119294	0.0285967	0.19184																																	0.000394213
MYH3_P11055	-0.0343254	-0.00304579	-0.0613729	0.023103	0.189792	0.00578407	-0.12756	-0.00558172	3.08166	0.129837	-0.593281	0.00303938	0.00320269	-0.0215535	-0.0306277	0.350526	0.202846	0.208642	0.124103	-0.0205149	0.0803027	-0.00605265	0.137359	-0.207438	-0.0827511	0.00602736	-0.265085	0.0565493	-0.0743521	-0.0506939	-0.0119054	0.120137	0.0115378	-0.176553	0.0396831	0.0538679	-0.167619	0.115929	-0.0116308	-0.128541	0.186128	-0.0888864	-0.0965295	-0.0827032	-0.134578	0.313803	0.0128361	0.0294322
MYH4_Q9Y623
MYH6_P13533																	0.107574	-0.00847046	0.151423	0.0753982	-0.0659956	-0.110303	-0.0135616	0.0116675	0.0924278	-0.0908051	-0.192967	-0.00919094	-0.0706846	0.14718	0.0941104	0.00842102	0.3003	-0.419311	0.0323958	-0.217575	-0.018301	0.0231839	-0.337419	-0.197763	2.88576	0.0634017	-0.599278	0.0839436	-0.241707	-0.124397	0.0385767	0.0180717	0.0894066
GOLGA4_Q13439-5	0.193008	0.0379042	0.0879168	0.118713	0.00395189	0.131516	-0.191984	-0.249265	-0.0264787	0.0127311	0.00946363	-0.00396274	-0.0597165	-0.100008	-0.0767973	-0.0293382	-0.0591414	0.025909	-0.0238339	-0.0577113	0.01542	-0.0155866	0.0960522	0.100034	-0.0598218	-0.102001	-0.05865	-0.123795	0.151212	0.0179008	0.0441751	0.0675245	-0.0649087	-0.0808173	-0.111171	-0.107767	-0.0164642	-0.067546	-0.124583	0.149483	0.0162785	0.165625	0.32064	0.292203	0.0305883	-0.0760819	0.151527	0.0757731	0.243002
MYH16_Q9H6N6	-0.552628	-0.352089	-0.0256376	-0.113094	0.126401	0.00438252	0.41965	0.543986	0.155968	0.146337	0.369563	0.197559	-0.00439587	-0.0356033	-0.237504	-0.0896545	-0.281329	-0.0812845	-0.292156	-0.603216	0.00478677	0.576848	0.369962	0.235258	-0.0048027	0.326841	0.289726	0.230116	-0.418081	-0.140556	0.0337804	-0.16767	0.0569716	0.0186963	0.0885446	0.0479945	-0.0913253	0.0082598	-0.122145	-0.114691	-0.0732929	-0.0233027	-0.00830737	-0.0159317	0.0714524	-0.139492	0.135783	0.139241
KHDRBS1_Q07666	-0.105448	-0.0899387	-0.138778	-0.0739423	0.0458382	-0.100875	0.0903825	-0.00873849	0.10941	0.00868587	0.0672153	0.0239914	0.0162121	0.0593612	-0.0586503	-0.018007	-0.145267	-0.0674741	-0.0606634	-0.083819	0.0697807	0.0041621	-0.00102238	0.0158324	-0.223715	0.0392728	0.194419	0.0383016	0.138747	0.00102165	-0.0538148	-0.138966	0.0970074	0.0599667	0.0270823	0.0227563	-0.0748926	0.03896	-0.0204241	-0.00332393	-0.0159599	0.0154479	-0.0414997	0.00331629	-0.00580735	-0.0354401	-0.0100743	0.0634479	0.0759626
MYH11_P35749-2	-0.00884338	-0.136837	0.0581729	0.0550138	0.0579844	-0.0281934	-0.0178126	-0.0915588	0.00616413	-0.00619058	0.0227364	0.0131774	0.00858525	-0.0338291	0.03139	-0.00891772	-0.019272	0.0340285	-0.039926	-0.0305097	0.151712	0.0900834	-0.0440596	0.0127884	0.0257423	-0.0190614	-0.0343185	-0.00174308	0.00174097	0.025917	0.123592	-0.0323668	0.000949778	0.0764669	-0.0328108	0.111241	0.00091286	0.0461434	0.042514	0.00102361	-0.000913438	-0.0706475	-0.040339	-0.116512	-0.0692758	-0.00182168	0.00821109	-0.055229	-0.0322416
POLE2_P56282																	-0.111932	0.167343	0.0887304	0.0834615	0.0294612	-0.181313	-0.0619633	-0.000672378	-0.0757567	-0.205203	0.000672065	0.238165	-0.063336	-0.0313565	0.00288847	0.048086
RRBP1_Q9P2E9	-0.343439	-0.280465	-0.0332816	-0.167298	-0.0506674	-0.37451	0.0477294	0.515878	0.206781	0.144719	0.0752069	0.0325311	-0.126098	0.193422	-0.134757	0.243041	-0.565522	0.0306919	-0.247804	-0.153225	-0.134252	-0.0444151	-0.0960524	-0.0116666	-0.116416	0.011573	0.207829	0.327913	0.327601	0.276676	0.291719	0.449068	-0.424952	-0.344162	-0.275984	-0.462749	-0.355163	-0.329158	-0.0883042	0.107614	0.0966479	0.311496	0.54815	0.455319	0.0172541	-0.017463	0.452008	0.131724	-0.204601
THADA_Q6YHU6	0.0176061	-0.0931785	0.0834015	0.0569164	0.0744771	0.0776048	0.019371	-0.0184177	-0.0138435	-0.0922462	-0.00454204	0.018106	0.00452779	-0.0561413	-0.0567299	-0.0629245	0.0411086	-0.0618939	-0.0310922	0.00340119	0.0220858	-0.0239069	-0.00340923	0.0567992	0.030434	0.0732748	-0.134044	-0.158882	-0.233993	-0.244773	0.0761411	0.0370106	0.0359158	0.00470897	0.0626381	0.1339	0.0566952	0.0756259	-0.0435541	0.0268724	-0.00768674	-0.00472439	-0.0103516	0.0453957	-0.0245128	-0.039694	-0.126181	-0.0646368	0.0540859
PRMT5_O14744	0.0421297	-0.0935701	0.026481	-0.0127957	0.0196989	0.0178072	0.017403	0.00303796	0.00552499	-0.0348719	-0.0056089	-0.0302987	-0.00304437	0.0164251	-0.0144386	-0.0480765	-0.00577832	-0.0240137	0.00739378	-0.0179736	0.0253933	-0.00197215	0.00166699	-0.00319265	0.0156798	-0.0409548	-0.00166892	0.0112801	0.033098	0.0565105	-0.0172598	0.0247049	-0.0128039	-0.0351857	0.0110519	0.0313221	0.0369462	0.00757662	0.0155551	0.0185548	-0.0424503	-0.0493426	-0.00761662	-0.0158859	-0.0206175	-0.0644131	0.220914	0.198654	0.0661736
ERC1_Q8IUD2	-0.0459101	-0.114541	0.0987823	-0.01337	0.0696152	-0.100818	-0.0298331	-0.14575	-0.102855	0.0132472	-0.154604	0.0258054	0.193165	0.0415637	0.265733	0.116931	0.657862	-0.247575	0.124998	0.16899	-0.18107	0.024595	0.153048	-0.0158047	0.0544341	-0.0555819	0.0156334	-0.223822	-0.377697	-0.055144	-0.332146	0.169783	-0.146655	-0.0359822	0.193548	0.149541	0.220446	0.176574	0.0975278	-0.0625817	-0.212829	-0.165367	0.0924075	-0.0938234	-0.0206559	-0.0834118	0.0382125	0.0203643	-0.00293992
NPRL3_Q12980																																																	-0.0950911
MIEF1_Q9NQG6	0.0589362	-0.0156349	0.00706209	0.022281	-0.00348907	0.0860375	-0.137835	-0.12801	0.00848036	0.00348065	-0.0106906	0.0123213	0.00757592	-0.0143949	-0.0198476	-0.0663842	0.091875	-0.00268298	-0.0133267	-0.0398218	-0.020325	0.0579707	0.032742	-0.0198615	-0.0281797	0.0441565	-0.485755	-0.605396	0.0919243	0.0988822	0.002678	0.0357814	0.120691	-0.0032772	0.0736649	0.106812	0.0594111	0.0463545	0.00326977	0.00910837	-0.0325076	-0.0288172	-0.038447	-0.054395	-0.0495055	-0.0586488	-0.0663782	0.00451182	0.136068
RBM17_Q96I25	-0.0851212	-0.0447995	-0.00450091	0.0895884	0.0464708	0.151908	-0.0770322	-0.0354753	0.106478	0.179082	-0.062554	0.00448691	0.0830918	0.145505	-0.0433933	-0.0326755	0.271125	-0.00472356	-0.327286	-0.224769	0.00742889	0.176903	0.214084	-0.130871	0.238577	0.00470814	-0.102595	0.0292871	0.131831	-0.193026	-0.0913055	-0.0272924	0.104791	0.0466601	-0.0332049	-0.101432	-0.00297446	0.0368428	0.0315581	0.0969463	-0.0227514	0.0807516	0.0377617	0.00296834	-0.0196987	-0.00673354	-0.00726507	-0.0292566	0.0771371
RANBP1_P43487	-0.0456265	-0.0928923	0.0350511	-0.00459059	-0.00175054	0.0052044	0.0894914	0.00799539	0.00174842	0.0616863	0.0957207	0.057742	-0.0178204	-0.0691495	-0.0543968	-0.0415418	0.0288096	-0.0174954	-0.108427	-0.00275214	0.0271288	0.0027469	-0.0292363	0.012616	-0.0929662	0.103833	0.0368871	-0.122096	0.0841068	-0.0370183	0.0120435	-0.0365018	0.0797722	0.0718792	0.0684297	-0.00161296	-0.0117781	-0.00684554	0.051989	0.00808382	0.0364041	0.00778063	-0.0972031	-0.109051	-0.018591	0.00161116	-0.0554848	-0.075744	0.000273655
PRC1_O43663																																	0.0315578	-0.0186626	0.0236198	-0.115178	-9.46781e-05	-0.114101	-0.0467808	0.142429	-0.203278	0.172167	0.163575	0.0763988	0.0985164	-0.0173977	9.46718e-05	-0.120392
PKIB_Q9C010-2																	-0.1233	-0.214847	0.0404651	0.124799	-0.0553498	-0.0125965	-0.193453	-0.0334721	0.0610562	0.0810784	-0.200927	0.126759	0.0124875	0.316172	-0.172369	0.0724989
APOB_P04114	-0.023951	-0.0937616	-0.0209296	-0.00249504	-0.0112856	0.0519228	-0.285918	-0.346795	0.00249073	0.103855	0.0299043	0.0700902	0.00819397	-0.0323831	0.0560747	0.0253976	-0.0528777	-0.00335251	0.106475	0.0488109	0.00334474	-0.0208656	0.0708108	-0.00708617	0.0862955	0.0947659	-0.329787	-0.37749	-0.250451	-0.144703	0.0530563	0.0438759	0.099527	0.116849	0.125728	0.0169527	-0.0280633	0.0836341	0.00646093	-0.0319007	0.0665625	-0.0105199	-0.263669	-0.142513	-0.0198459	-0.00648999	0.0309439	-0.0584564	0.00557175
CHMP4A_Q9BY43-2	0.0151311	-0.110833	0.0199195	0.00202943	-0.0317351	-0.0233284	0.023297	-0.0690453	0.00937087	0.0311737	0.060505	0.0424816	-0.00203229	-0.0311703	-0.00508149	-0.016728	0.0389055	0.0196163	0.0676708	0.00380457	0.0299056	-0.0706875	-0.0411467	-0.0821053	0.0525242	-0.0145668	-0.0431951	-0.0411443	0.0287008	-0.00381463	0.0211827	-0.0122218	-0.0555459	-0.0298862	-0.0280491	0.0189176	0.0893513	-0.0196871	-0.0195611	-0.0889181	-0.0459534	-0.00625348	0.0706349	0.0062265	0.0188585	0.0610568	0.0793698	0.084	-0.0422582
TM9SF1_O15321	-0.0111024	-0.134993	-0.145374	-0.0443694	0.0381622	0.145868	0.0140015	0.0110176	-0.0428314	-0.101245	-0.227501	-0.286939	0.352787	0.132296	0.174698	0.162339	0.222254	-0.0798898	-0.0730963	0.420218	0.0771519	-0.198332	0.0303181	-0.106542	0.164141	0.0580545	0.0170917	-0.374168	-0.0172966	-0.217089	-0.187488	0.10752	-0.0617934	-0.0627229	-0.064936	0.00532307	-0.00534278	0.0944638	0.0902781	0.0608179	-0.0277881	-0.0143429	0.0792082	0.036851	-0.0930455	-0.00769153	0.0156463	0.0429123	0.0541713
CEP131_Q9UPN4																	-0.062522	-0.0321478	-0.00615874	-0.0163335	0.10325	-0.0352784	0.00891954	-0.0684531	0.0303035	0.00613256	0.0509709	0.118326	0.0130544	0.0142736	-0.0504833	-0.0839964	-0.00593456	-0.0635455	-0.145576	-0.153577	0.00070311	-0.0960831	-0.000703453	0.145342	0.0947057	-0.0712273	0.00502525	0.168367	0.150516	-0.26641	0.0111354	0.111399	0.159397
EXOC3_O60645	0.106427	-0.0845015	0.0655761	-0.00844472	0.0981864	0.0545905	-0.0118998	0.00939303	-0.14433	0.0234943	-0.058738	0.00839557	0.121849	-0.0251012	-0.0282646	-0.0100446	0.13008	0.0689387	-0.108103	-0.0993191	0.156421	0.162931	0.154225	0.0564598	0.0496012	-0.116062	-0.266443	-0.376213	-0.193518	-0.246385	-0.0513675	0.0566062	-0.0118905	-0.0422206	0.0684459	0.17272	0.147696	0.0552945	0.089667	-0.0230953	-0.06443	-0.112561	0.222588	0.0117933	-0.0143095	-0.121857	0.0157217	-0.118372	0.0965539
ITIH1_P19827
VPS35L_Q7Z3J2	0.0860811	-0.0116921	0.0753226	0.0655255	0.140506	0.00261611	0.0154595	-0.00262086	-0.076614	-0.0407913	0.0641438	0.0546454	-0.00630873	-0.00645691	-0.0822936	-0.0103009	0.158745	0.0574911	0.0492456	0.072547	-0.00136636	-0.0772303	-0.00676372	-0.0100165	0.00136507	-0.024559	-0.156484	-0.0422728	0.123001	-0.123052	0.022878	0.119405	-0.0618827	-0.0887222	-0.0983557	-0.204711	-0.126583	-0.133485	-0.0571722	0.0255776	0.0249796	0.112714	0.220467	0.152004	-0.00864077	0.00858933	0.184582	0.154959	0.00892496
OXSR1_O95747	0.0306314	-0.0292088	0.0304988	0.0387961	0.0662486	0.0400005	0.000788598	-0.0282811	-0.0364586	-0.0475113	0.0081327	-0.000789029	0.0113192	-0.0556866	-0.0307352	-0.0478127	0.176857	0.0918466	0.0621918	-0.00707069	0.0774698	0.00703621	-0.0470865	0.0233809	0.0206964	0.00922608	-0.218464	-0.262394	-0.0539382	-0.138678	-0.0188905	-0.135039	0.0354446	0.0289589	-0.0017923	0.0783868	0.0146135	0.0821858	-0.0290272	0.015627	-0.0150902	-0.147995	0.0195539	0.00179008	-0.0335118	-0.0271563	-0.11049	-0.0769161	0.0771553
STK39_Q9UEW8	0.0611873	-0.0153746	0.0458852	0.0207375	0.0331766	0.0653134	-0.0634059	-0.117363	-0.0361826	-0.07089	0.0974238	0.0228878	0.0152125	-0.0276375	-0.096572	-0.113638	0.173446	0.13624	0.106678	0.106723	0.146741	-0.0209421	-0.0509911	0.0512455	0.0717711	-0.0376403	-0.246675	-0.252349	0.0162615	-0.0918622	-0.056001	-0.0164469	0.00206223	-0.00951424	-0.013376	-0.00206518	-0.102396	0.0719218	0.0861733	0.0381751	-0.0266107	-0.0802103	0.13573	-0.013478	-0.0981953	0.0406434	0.0124364	0.0134851	0.0193735
VWA5A_O00534	0.111574	-0.0444466	0.0456665	0.0776291	0.0497033	0.0730625	-0.0472097	-0.169247	-0.065588	-0.0529294	-0.048574	0.0531889	0.0109291	-0.0218841	-0.0110125	0.0471262	0.179491	0.0332221	0.108019	-0.198418	0.145809	-0.015257	-0.0145411	-0.00274758	-0.319207	-0.233908	0.00274236	-0.125144	-0.13791	0.083988	0.0248802	0.09182	0.220588	0.176186	0.0182868	0.204261	-0.0616533	0.0619637	-0.0185216	0.104982	0.188088	0.0222412	-0.0240861	-0.1147	-0.110732	-0.121725	-0.175786	-0.100709	0.118185
WDR3_Q9UNX4	-0.113505	-0.231199	0.0239215	-0.102292	0.12884	-0.0800502	-0.0606001	0.214584	0.0896268	0.015593	-0.0157634	0.031526	-0.0319045	0.157723	-0.104502	0.0651177	-0.259726	-0.161493	-0.02504	-0.11836	-0.025548	0.0519018	0.0705105	-0.0460128	-0.171157	0.0246128	0.255151	0.29435	0.0645778	-0.0316937	0.06249	0.111012	-0.201347	-0.247449	-0.199497	-0.371261	-0.215932	-0.259599	-0.0228539	0.126357	-0.0589917	0.119335	0.41029	0.387623	0.0244412	0.0224975	0.395162	0.142748	-0.142144
SIDT2_Q8NBJ9-2	0.0777951	-0.0261523	-0.213219	-0.0820667	-0.0126432	0.0513984	-0.212733	-0.267037	0.0333758	-0.132384	0.0125334	0.160917	0.1447	0.101762	0.110872	-0.121096	-0.0343659	0.0595445	0.00158561	0.0869915	-0.0717528	-0.14209	0.0307454	-0.0801858	0.0770329	-0.0090081	-0.0375598	-0.00158735	0.0194586	-0.00741837	0.0849326	0.0522721	0.0564944	-0.0220097	0.00174926	-0.0085693	-0.0917095	0.0815585	0.23063	0.0239957	-0.043486	-0.108397	-0.00175138	-0.00698933	0.154766	0.0206329	0.132307	-0.0373632	-0.027604
RAB24_Q969Q5	0.00852797	-0.0359241	-0.0040391	-0.00167659	0.00167464	-0.0494371	-0.00767704	-0.0855192	0.0084157	0.0255112	-0.0250414	0.0953471	0.0663377	0.0358946	0.0593273	-0.0216098	0.0764783	0.0747505	-0.0422186	0.0546569	-0.0329145	-0.0378134	-0.100342	-0.100849	0.084065	-0.0193048	0.0113823	0.0907639	-0.0114728	0.074884	-0.0175119	0.0483274	-0.0856439	-0.000444901	-0.0393237	0.0570804	0.000444764	-0.00277076	0.0267832	-0.0304737	0.0219539	-0.0289655	-0.0150015	-0.0150131	0.0668307	0.0466614	0.0529383	0.0546347	-0.0243544
RNF13_O43567	-0.0576346	0.119164	-0.025999	0.0139886	-0.116233	-0.0344401	-0.22644	-0.00918949	0.0209556	0.0186007	0.0147886	0.0470171	-0.132253	0.0151021	-0.014165	0.00913133																	-0.231459	-0.0149684	0.0148147	-0.0232658	-0.21063	-0.149694	-0.111616	-0.152189	0.0252015	0.0358477	0.106204	0.0679253	-0.214641	0.129224	0.0390708	0.0601762	-0.014602
SLC25A14_O95258-3	0.0885682	0.0105526	-0.0606075	0.0596874	-0.0807694	0.0153363	-0.0106304	-0.176778	-0.0209989	0.0559075	0.0812367	0.114203	-0.0349334	-0.16079	-0.126782	0.0873219	0.0336592	0.0412878	0.1484	-0.00588456	-0.0415113	0.106527	0.000246316	-0.000246358	0.132507	-0.0503039	0.0301996	0.100289	-0.113342	-0.0265403	-0.0942131	-0.0941014	0.43482	-0.0441758	0.144799	0.00373901	0.0537317	-0.251553	0.0910543	0.0815168	-0.308023	0.0967028	-0.532375	0.0242772	-0.0442693	-0.164217	-0.234731	-0.00374872	0.161444
SLC25A30_Q5SVS4																	0.11927	-0.0570979	-0.0496026	-0.0437826	-0.0526219	-0.167685	0.119387	0.220085	-0.0492853	0.212686	0.241307	-0.166212	0.145166	0.0424929	0.171035	-0.165772	-0.145154	0.122338	0.0916897	0.113529	0.152118	0.00072721	-0.0706814	-0.000727577	-0.0940511	-0.297602	-0.123147	-0.0987294	0.0529284	-0.0949792	0.0164469	0.0342098	-0.0891219
FEM1B_Q9UK73	0.053712	-0.0914355	0.0143128	0.0846472	0.016635	0.00637392	-0.0247865	-0.12776	-0.0685248	-0.0202247	-0.0064022	0.112678	0.00683157	-0.144951	0.0287341	-0.0810682	-0.0722715	0.0647888	0.0139822	-0.0597872	0.076317	-0.0528302	-0.148405	0.031977	-0.00963027	0.0724794	-0.0828227	-0.0339455	0.107883	-0.0627546	0.00956641	0.195658	-0.0575626	0.0472514	-0.0868668	0.0577219	-0.0543516	0.0152549	0.0110058	-0.0459675	-0.0206933	-0.0109228	0.0134868	-0.0109624	-0.0101036	0.0591884	0.0100334	0.0189604	0.0646308
NUFIP2_Q7Z417	-0.128197	-0.127462	-0.06237	-0.0241444	0.00194838	-0.150318	-0.00860801	0.134042	0.128984	0.0900373	-0.0167258	0.000723131	-0.000723494	0.0450301	0.0101877	0.0528645	-0.309035	-0.160776	-0.110189	-0.0588932	-0.0637408	0.0110024	-0.052467	-0.0293945	-0.0110869	0.0633505	0.130673	0.0975689	0.164044	0.0724804	0.0352085	0.0991562	-0.125649	-0.0282486	-0.102108	-0.121066	-0.173517	-0.166516	-0.128034	-0.0172853	0.0170806	0.117205	0.0532299	0.125525	0.0804493	0.12633	0.138228	0.0727416	-0.102588
PRDX6_P30041	0.0715666	-0.0700188	0.0251443	0.0126733	0.0253691	0.044896	-0.00883629	-0.0768744	-0.0173118	-0.0374751	0.00699186	-0.00871538	0.00549835	-0.00551938	0.00818051	-0.0304141	0.177521	0.040452	0.0478895	0.00203246	-0.0475714	-0.0501009	-0.0512428	0.00547417	0.029108	-0.00535582	-0.0555238	0.0113428	-0.00203533	-0.0405347	0.00899957	-0.0270744	0.0874921	0.0463023	0.120969	0.0885598	0.101351	0.0501113	0.042867	-0.00537786	-0.0338007	-0.0281569	-0.0130655	-0.0451262	0.00535789	-0.013938	-0.0278671	-0.0284964	0.115461
RPL11_P62913	-0.467461	-0.387179	0.00811511	-0.252769	-0.0419317	-0.453604	0.147061	0.763487	0.315469	0.227079	-0.00816102	-0.0810207	-0.197782	0.291298	0.0848233	0.322804	-1.03722	-0.239139	-0.242984	-0.168934	-0.00118365	0.00118268	0.096109	-0.00569303	-0.138565	-0.130272	0.352419	0.275411	0.632342	0.422993	0.151131	0.283781	-0.519837	-0.408895	-0.321072	-0.603129	-0.398852	-0.515812	-0.163092	0.15071	0.0690532	0.397903	0.613817	0.530984	0.0446706	-0.0460981	0.611993	0.286758	-0.406848
JMJD1C_Q15652	-0.0244055	-0.129029	-0.0298608	0.139056	0.05934	0.0410882	-0.0559146	-0.00608103	-0.031488	-0.0248117	0.0382807	0.0707362	0.0105155	-0.155928	0.00605551	0.00731019	0.0467147	-0.00317092	0.0455252	0.0589733	0.0567377	0.120236	0.0823277	0.154258	-0.0169078	-0.041455	-0.153519	-0.02738	0.00316397	-0.086277	-0.138056	-0.109459	-0.0456355	-0.0238127	0.0792477	0.106923	0.0659947	0.0749955	-0.0457023	0.0146704	0.0523428	0.0455856	0.0882446	-0.0148211	-0.0819649	-0.0556447	-0.0387584	-0.0992662	0.00246582
KDM3B_Q7LBC6	0.0643052	-0.00156433	0.095713	0.068047	0.0415296	0.0539835	0.000530308	-0.0096244	-0.0160461	-0.0453579	0.0283398	0.0572923	-0.00903589	-0.0699889	-0.000530503	-0.025888	-0.000634546	-0.00133067	-0.0142711	0.0391294	0.0610501	0.0769593	0.0361978	0.0399479	-0.00602034	0.0550828	-0.0680687	-0.073134	-0.0399875	-0.0498175	0.000678159	0.000634267	0.0176241	0.0278593	-0.0539646	-0.0101084	0.0130255	0.038801	0.00744917	0.0578253	-0.0698288	-0.0191249	-0.00748783	-0.0813509	0.091394	0.0505844	-0.11889	-0.0621523	0.0612771
KDM3A_Q9Y4C1																	0.279292	0.147567	-0.063006	0.0224996	0.0363858	0.0230173	0.0409917	-0.0495663	0.0352791	-0.105214	0.0165519	-0.171997	-0.122937	-0.0821921	-0.016744	-0.0983383	0.0949883	-0.118696	0.0890347	0.100031	-0.0615145	0.176839	-0.161063	-0.282514	0.0081998	0.0651342	-0.00824667	-0.137379	-0.0648978	-0.235496	0.160528	0.0448284
GHDC_Q8N2G8	0.0236746	-0.0763281	-0.0326654	0.0170217	0.0156893	-0.00011614	-0.145252	-0.184493	0.000116131	-0.0106559	0.0224049	-0.015541	0.0796693	-0.0491839	0.063506	0.0585349	0.00425165	0.034192	-0.00729356	0.0902976	-0.0485297	0.0019454	0.0837873	-0.0479352	0.00315521	0.012159	-0.0547627	-0.028048	0.0276327	-0.023782	-0.0450733	-0.00194802	0.0078208	-0.0240731	0.0308632	0.0583284	0.0379948	-0.00548835	0.036269	0.00546755	-0.110226	0.030978	-0.0593718	-0.0885894	-0.0615109	0.0225985	-0.0295671	-0.0286989	0.064199
CCDC85C_A6NKD9	-0.0379193	-0.144202	0.00727259	0.0642524	-0.133707	0.0909686	0.00424496	-0.00439055	0.935855	0.0738749	0.0222749	-0.00425749	-0.119791	0.00761992	-0.0421334	-0.0421501	0.247853	0.0961646	0.161724	-0.0624519	0.0907544	0.0822668	-0.23541	-0.24997	-0.0297227	0.167548	-0.118858	0.0486927	0.0291227	-0.0706879	-0.335415	-0.101766	0.230635	0.165808	-0.00631556	-0.0770476	0.149531	0.00628803	-0.0828338	-0.108854	0.215041	0.0901314	-0.417546	0.0311104	-0.1423	-0.0368611	-0.124995	0.184118	-0.29942
CARS2_Q9HA77	-0.0543048	-0.0243349	-0.0306616	0.087592	0.0471091	0.0484552	0.00904817	-0.0110223	-0.0159159	0.059768	0.0785691	0.138166	0.0145936	-0.0221072	-0.00910527	-0.0213693	0.0364804	-0.00548615	-0.0399773	-0.031304	0.0273123	0.0281996	0.0272444	-0.136433	-0.0961967	0.070271	0.0934228	-0.0234985	0.10349	0.00546536	-0.0166475	-0.055447	0.0181983	0.048415	-0.0309067	0.00673488	0.0125546	-0.00474628	0.0163309	-0.0523964	-0.0583502	-0.136462	-0.104979	0.0339527	0.023559	-0.0401398	0.00473071	-0.0573582	-0.100426
ISCU_Q9H1K1	0.0497097	-0.0545791	-0.00188323	0.0341024	-0.0172625	0.602119	-0.0584983	-0.155579	-0.016321	0.0200949	0.00188077	0.016264	0.00815379	-0.0110106	0.00441305	-0.028133	0.0406492	-0.00899344	-0.00578342	-0.0673811	-0.00119551	-0.0758747	-0.0124062	-0.0124924	0.052203	0.00119452	0.0496439	0.0542238	0.00417706	0.0117348	0.0182001	-0.0180819	0.0011426	-0.00240588	-0.0129758	0.0210829	0.021274	-0.0616471	-0.00361843	-0.0417149	-0.0189087	-0.00114351	0.00382358	-0.00739914	0.0103289	0.0221657	0.00695238	0.0297568	0.022567
EML3_Q32P44-2	0.0574261	-0.102218	0.0319024	-0.0654485	0.0654679	0.139569	0.143414	-0.00157707	-0.0641738	-0.0524195	-0.0205811	-0.0673444	0.147026	0.00157535	-0.184229	0.0118781	-0.0955632	-0.0229283	-0.0922607	-0.132625	0.0253847	-0.0591224	0.0207264	0.0566406	-0.028671	-0.0115063	-0.0334884	0.041633	0.177674	0.0773581	0.0114153	0.121214	-0.10772	-0.019363	-0.0594381	0.0174494	-0.0238708	-0.00785246	-0.0962591	-0.00818159	0.0704009	0.126732	0.127489	0.0785248	0.0189898	0.00236933	0.128789	-0.00237323	0.0716351
EML3_Q32P44	-0.183266	-0.2496	-0.0889143	0.152082	0.213528	-0.00387085	-0.0816071	0.285094	0.0285158	0.0741873	-0.018382	0.107488	-0.107803	0.152441	0.00386049	-0.0454107	-0.326073	0.219309	-0.156271	-0.058233	-0.0276852	-0.00818775	0.116578	0.0578414	0.00814154	-0.0321603	0.0861921	-0.149397	0.377351	0.0337067	-0.207062	0.044855	-0.139405	-0.074395	-0.0562892	-0.0956538	-0.0970321	-0.143179	-0.11569	0.0541752	0.0699759	0.191984	0.196434	0.182845	0.0956954	-0.0759042	0.217443	0.0765842	-0.074142
INTS14_Q96SY0	0.0405325	-0.0378277	-0.0228571	0.0375624	0.031015	0.0156005	0.00108353	-0.102552	-0.0286157	-0.00108434	0.00675498	0.0515647	0.0422052	-0.00967439	-0.0188221	-0.0563675	0.0142816	-0.0148171	-0.0469913	0.000843069	0.101318	0.0298324	0.0501576	0.038466	-0.000843562	0.00940308	-0.0585247	-0.0641883	0.0612763	-0.0393533	-0.03426	-0.0233555	0.0767844	0.0159793	0.0583452	0.0586985	0.0444762	-0.0252932	-0.0222966	-0.0321683	-0.0316479	-0.00789714	0.0466641	-0.0700891	0.0335613	0.00785415	-0.0383064	-0.02727	0.106872
POLG_P54098	-0.0412408	-0.0651663	0.0622828	0.000685633	0.0581225	0.110762	-0.00901541	0.0457828	-0.0720272	-0.000685959	0.0525053	-0.0282888	-0.0395582	-0.0286912	0.049694	0.0541447	-0.0367915	-0.222417	0.144976	0.14456	0.0188981	-0.229075	0.149387	0.0764057	0.0463897	-0.132046	0.0111443	-0.230476	-0.0526628	0.0746018	-0.011231	-0.0910913	-0.0502493	0.00788538	-0.0176575	0.0597856	-0.00792871	-0.106311	0.0101686	-0.0866792	-0.101963	0.116933	0.0374456	0.0569015	0.0144004	-0.0715235	-0.173295	0.0931606	-0.0216582
PDLIM1_O00151	0.0575846	-0.0860235	-0.0175211	-0.00111361	0.00111275	-0.00281164	-0.00944963	-0.101052	0.00494372	0.00686228	0.0147098	0.0140565	0.0297425	-0.007324	0.0367878	-0.0168277	0.0430423	0.0194339	-0.0131165	0.076391	0.00358424	-0.0190586	-0.00744227	-0.0245511	0.0180994	0.0203555	-0.0040535	-0.00266139	-0.0474884	0.00322058	0.00265649	-0.0211337	0.0167352	0.0287014	0.0244794	-0.0170413	0.0358598	0.0406498	0.0557623	-0.0396333	-0.015105	-0.0263016	-0.0991069	-0.0647548	0.00735472	0.00355087	-0.00355963	-0.0467149	-0.0181121
TCOF1_Q13428-4	-0.000940772	-0.0823446	0.0140339	-0.00291886	0.010077	-0.0314659	-0.0503967	-0.0235741	0.0566384	0.0546712	0.000940159	0.0272157	-0.0212681	-0.0466134	0.00327408	0.0293427	-0.0199902	-0.0199178	0.0217302	0.0338338	-0.0116262	-0.0408433	-0.00813325	-0.0161622	0.0157962	0.00808765	-0.073451	-0.0467622	0.0519755	0.0318194	0.0458389	0.0806628	-0.0100992	0.017882	-0.0684354	-0.0237053	0.011093	0.00131789	-0.00269714	-0.0202882	-0.000809304	0.0391727	0.000578455	-0.031718	0.0365658	0.0474469	0.0250539	-0.000578687	0.0430663
TCOF1_Q13428-3																	0.139549	0.00317314	0.388546	-0.0122185	0.054872	0.35503	-0.00685753	-0.00318013	-0.146757	0.00788013	-0.521025	-0.351523	0.0111361	-0.342731	0.388962	-0.0797624
TCOF1_Q13428-6	-0.318713	-0.0449686	0.0883418	-0.0717336	0.138996	-0.484078	0.234816	0.0381966	0.244909	-0.312355	0.0148139	-0.105153	0.391694	-0.151881	-0.0149676	0.4325																	-0.605743	-0.0485406	-0.118436	0.259331	0.0831309	0.218628	-0.291165	0.166672	-0.130661	-0.17424	0.0469604	-0.0977696	0.413711	-0.355921	0.13176	0.0758056
CLEC11A_Q9Y240																	-0.0738876	-0.208015	0.130411	-0.0990863	0.222925	-0.0886223	-0.0159813	0.0345422	-0.19752	0.0825637	0.229705	0.157141	0.0375797	-0.0531276	-0.0561056	0.0158063																	0.02976
CCNA2_P20248	-0.0261275	-0.0612399	-0.00601841	0.0308356	0.0120822	-0.00378301	0.0258713	-0.0153634	-0.00465822	0.0396445	0.000714341	0.0269277	0.0300445	-0.0291043	-0.000714694	0.0116037	-0.017243	-0.0124543	-0.0263532	-0.0221249	0.0428371	0.019458	0.00588764	0.0216497	-0.010295	0.095234	0.0220909	0.0251115	0.0100799	-0.00591177	-0.0415415	-0.0928119	-0.0186069	0.0298195	0.0151821	0.0168944	-0.029473	-0.00190125	0.0277262	-0.0440135	0.00156439	-0.00156609	-0.0700162	-0.0593947	0.0173074	0.0989863	0.0064382	-0.0127233	-0.0754452
AP1G1_O43747-2	0.0623267	-0.0900316	0.079902	0.03067	0.0961386	0.00685667	0.0079318	-0.00688941	-0.0430218	-0.0131395	0.010827	0.0629856	-0.0237036	-0.0321978	-0.0216488	-0.0549924	0.0349011	-0.0150387	0.0312791	-0.026729	0.128398	0.0550493	0.00736791	0.0869163	-0.0174837	-0.00740574	0.0150092	-0.0622611	0.0125551	-0.0384081	-0.0259858	-0.0716774	0.0324761	0.0480555	0.00623949	0.00120253	-0.00576806	0.0749331	0.00748737	0.100221	-0.00120353	-0.0188235	-0.0137583	0.0656257	-0.0204316	-0.0750351	-0.0476719	-0.0534496	0.0886437
AP1G2_O75843																																	0.0461109	-0.0476335	0.124435	-0.861225	-0.152956	0.18242	-0.586549	-0.285546	0.484018	0.0477019	0.367594	0.611367	-0.220199	-0.37701	0.208888	-0.153262	-0.00721727
NAPA_P54920	0.0154988	-0.0628448	0.000329296	0.00354692	0.00393283	-0.00656937	0.0101482	-0.0283367	-0.0142197	-0.0305109	0.049428	-0.000329372	0.00716076	-0.0252842	0.00114876	-0.0604412	0.0547271	-0.0173828	0.0212075	-0.00321978	0.020926	0.0107599	0.0142531	0.0302567	-0.0458239	-0.00577258	0.00321261	0.0117402	-0.0296537	-0.0812452	-0.0502001	-0.0714958	0.106397	0.0304202	0.0514495	0.0266337	0.0103541	0.0220957	0.0107016	0.0289583	-0.0276839	-0.0534384	-0.0679222	-0.0442854	-0.0104289	-0.0197682	-0.103803	-0.0298782	0.0305138
ARHGAP17_Q68EM7	0.136364	-0.0139444	0.00693292	0.0289602	0.0676474	0.129715	-0.0745545	0.161428	-0.119294	-0.183024	0.134856	-0.0069664	-0.0676665	-0.0326273	-0.146832	0.0258037	0.084665	-0.106808	-0.32594	-0.0230731	0.193099	0.0407662	-0.0535853	0.206879	-0.151251	0.173031	-0.046447	-0.129644	0.0812624	0.00975917	-0.0030928	0.00308618	-0.000440429	0.0231433	0.108528	-0.156561	-0.300262	0.0569828	0.0436698	0.144442	-0.121959	0.000141372	0.152415	0.163465	-0.178588	-0.130676	-0.0575283	-0.000141386	-0.0179599
LRP5_O75197																	0.21149	0.128614	0.0125645	0.0336337	-0.156421	-0.0687973	0.0519431	-0.0784176	-0.141261	0.200563	0.102726	-0.0126748	-0.100075	-0.0403347	-0.0363664	0.13185	0.267481	-0.0036445	0.155215	-0.20971	-0.109361	-0.124213	0.0281054	-0.475969	-0.0314906	0.0726479	0.00363531	-0.0598287	0.171043	0.389972	0.337533	-0.0657168	-0.0276323
LRP6_O75581	0.0704582	-0.0742904	-0.0743195	0.0760366	-0.0212346	0.204283	0.0209266	0.157952	-0.0733289	0.128965	-0.0288284	-0.0400372	0.264564	-0.0991026	0.227583	-0.0607233	-0.00198193	-0.230136	0.230642	0.0149969	-0.122154	0.156901	-0.0702846	0.126878	0.229755	0.00197921	-0.201747	0.0606204	-0.104102	0.090107	-0.0690208	-0.301213	0.0175905	-0.154099	-0.135947	0.231381	-0.0178077	0.162848	-0.0846467	-0.237613	-0.0918768	-0.0859806	0.21718	-0.0858141	0.22578	0.205105	0.184337	0.0418846	0.0602387
LRP1_Q07954																	0.0897907	0.00820417	0.126404	0.106051	0.285962	0.205772	-0.0550428	-0.0207104	-0.0293688	0.410765	-0.222951	0.0310837	-0.123928	-0.00825109	-0.298155	-0.156778																	-0.0444222
QDPR_P09417	0.0010921	-0.133681	0.0398268	-0.00283965	-0.0141776	-0.0457343	-0.000155753	-0.0941515	0.0213171	0.00910475	-0.0370627	0.0259975	0.0800741	0.000155736	0.038758	-0.00834313	-0.00777815	0.0284462	-0.048656	-0.00262581	0.0162418	-0.0690849	0.0560627	-0.033359	-0.00772247	0.0438668	0.00262104	-0.0165761	0.034582	0.0619166	0.0120491	-0.00367794	-0.0442263	0.0692695	-0.0321788	-0.014519	0.0272535	-0.0233441	0.0143743	-0.0682767	-0.0201445	0.0227998	-0.0307262	-0.0256487	0.0843144	0.106254	0.110415	0.0573427	-0.0678933
EVPL_Q92817																	0.16742	-0.00415936	0.474152	0.451865	0.342162	0.0041474	0.113591	-0.113952	-0.0272244	-0.156162	-0.0250718	-0.315418	0.369724	0.492173	-0.0787949	-0.238976
CMAS_Q8NFW8	-0.168355	-0.119454	-0.0999891	-0.0836526	0.0102417	-0.114371	-0.0153013	0.15927	0.0714292	-0.00954106	0.00947837	0.0565503	-0.0461293	0.0440288	0.0114938	0.0525381	-0.234223	-0.0440073	-0.00229472	-0.0563028	-0.0122455	0.0701982	0.00229108	-0.0510098	-0.0590807	-0.0413892	0.0281152	0.0721153	0.0349777	0.0548342	0.0524119	0.14641	-0.0501263	-0.0832871	-0.0526259	-0.0957156	-0.0475617	-0.0213947	-0.0369448	0.0454112	0.021082	0.0952731	0.277026	0.227007	0.0333601	-0.0651697	0.135167	0.134939	-0.00385133
FBXO6_Q9NRD1	-0.0451065	-0.106891	-0.0246783	0.00901394	0.0232613	-0.01208	0.466289	0.417434	-0.150081	-0.0583162	-0.000251716	0.013889	0.0296311	0.000251672	0.0488212	-0.02315	-0.256411	-0.105501	-0.0834433	-0.0986164	0.0784855	0.0685738	0.00366959	0.025514	-0.0215972	-0.0708893	0.390289	0.341478	0.0245361	0.150642	-0.00367895	-0.0724813	0.168028	0.0418893	0.0840818	0.00903966	-0.00909665	0.183867	0.0243789	0.0644091	0.0596118	-0.061197	-0.150434	-0.0144587	-0.0119282	-0.0520791	-0.0709041	-0.112612	0.0557674
FBXO44_Q9H4M3	0.0237467	-0.135622	0.0155746	0.0596619	0.0501939	0.0383258	-0.0590949	-0.182621	-0.201765	-0.127118	-0.0267076	0.101232	0.0425637	-0.0157446	0.0168303	-0.101196																	-0.132649	0.0442145	0.262702	0.241099	0.193039	-0.0586528	0.183857	-0.127681	-0.00401861	-0.277285	0.0591117	-0.192289	0.00400745	-0.127879	0.0554662	-0.123013
C6orf47_O95873	-0.00038277	-0.0739409	-0.00314588	0.0301188	0.0394072	-0.00127322	-0.036323	-0.119918	-0.0471924	0.0315722	0.0442136	0.0907433	0.0453736	-0.0458186	0.00425895	0.000382669	-0.0387236	-0.00208918	-0.0392992	0.0732671	0.0106067	-0.193798	-0.0750346	-0.111384	0.0112589	-0.0788574	0.00208616	0.159131	0.138047	0.103391	-0.0736655	0.0560856	-0.00452132	-0.00438025	-0.0153952	0.0877091	0.127677	0.0253785	-0.000276691	-0.0683072	-0.0292827	0.000276638	-0.00520838	0.0247508	0.0804642	-0.036063	0.0012721	0.0472446	0.0420364
ZNF598_Q86UK7	0.0501871	0.00677133	0.0558234	0.0225212	0.0953567	0.0347357	0.00996666	-0.00841756	-0.00630336	-0.0132062	0.00437075	-0.00438404	-0.0310024	-0.00654403	-0.0997536	-0.0345801	0.0794479	0.0150702	-0.0152293	-0.0696237	0.0909128	0.105886	0.0421577	0.139817	0.0297082	0.087595	-0.14532	-0.158328	-0.108042	-0.0992784	-0.0253393	-0.0396921	0.133478	-0.0201446	0.138123	0.031667	0.0133193	0.0874486	-0.0309223	0.0622368	-0.230891	-0.0770983	0.0187488	0.0790652	-0.0134434	-0.146885	-0.167496	-0.283188	0.0391697
ADH5_P11766	0.041377	-0.109525	-0.0156158	-0.0295683	-0.0105614	0.0622899	0.0460727	-0.0632214	-0.00546218	0.0411729	0.0108169	0.00225791	0.0246652	-0.00226145	0.0627276	-0.0110823	0.0364342	-0.00218517	0.000126943	-0.000126954	0.0021012	-0.0281037	0.0200244	-0.00724266	0.027861	0.0313411	-0.0299335	-0.0103568	-0.0343045	0.00675627	0.0120878	-0.0142491	-0.0134276	-0.000936259	0.00411993	0.0375152	0.0514582	-0.00353233	0.0529764	-0.0365742	-0.0280013	-0.00507878	-0.0437749	-0.0232083	0.000935652	0.0327712	0.0111983	0.0110883	-0.054603
PHKA2_P46019	0.214707	-0.0452284	0.090034	0.0236623	-0.0323865	0.0852107	-0.088424	-0.126076	0.0233133	-0.0161291	0.0159508	0.0654884	-0.0570924	-0.133534	0.0218302	-0.0584926	0.176346	0.0294021	0.157548	-0.00235611	0.06299	0.0177381	0.00235226	-0.0754994	0.0357057	0.0862678	-0.358699	-0.341462	-0.0863389	-0.0796827	-0.0532225	-0.00408067	0.110477	0.0887728	0.108143	-0.0411874	0.0147691	-0.0198879	-0.0149218	0.0592464	0.0289246	-0.0951441	-0.189244	-0.0268832	0.0271828	0.0204602	-0.111247	-0.0640434	0.0267533
PHKA1_P46020	-0.146994	-0.0748627	-0.118003	-0.148391	-0.047084	-0.0297104	-0.00295253	0.0479737	0.0112766	0.084936	0.0264782	0.020863	0.0029465	-0.00411909	0.00298322	0.0524293	-0.0856056	0.124404	0.0995296	-0.000604978	-0.0285359	0.0542744	0.107738	-0.11583	-0.0839178	0.000298945	-0.173894	0.0833729	-0.0305593	-0.000299007	0.167714	0.119203	-0.0542348	-0.108582	0.0801818	-0.0271232	-0.172886	0.0176473	-0.0602745	0.0132104	-0.00581528	0.107468	0.164466	0.213528	0.0607528	-0.0387632	0.00579194	-0.152408	0.0266374
SHMT2_P34897	0.0116638	-0.0949442	0.00264269	-0.00273299	-0.014406	-0.000185573	0.000185549	-0.0514807	0.00617025	0.0391005	-0.0288456	0.0477545	0.033875	-0.00953425	0.0356684	-0.0116195	0.0292032	-0.0270325	0.0141415	0.023783	-0.0237644	-0.0655802	-0.0332936	-0.0461098	-0.0234926	0.0169327	0.0647067	0.0285796	-0.00991833	0.00933311	0.0302871	-0.00939388	-0.0049252	0.0235176	0.025179	0.00164491	0.00287161	0.00390878	0.0177139	-0.045396	-0.0310685	-0.00164679	-0.044654	-0.0305198	-0.00413206	0.0219565	-0.012025	0.0173086	-0.0245837
SHMT1_P34896	-0.0593333	-0.118061	-0.0284903	0.0114503	0.0134856	-0.0179768	0.0521444	-0.0359075	0.00915464	0.0265077	-0.0092131	0.0267077	0.0799393	-0.0232875	0.063987	-0.0342167	0.130063	-0.0337689	0.0624164	0.0760649	-0.04123	-0.0457883	0.0302884	-0.0129611	-0.0680438	0.0413129	-0.0435491	-0.0590801	0.0128457	0.0574897	0.0223776	-0.0548282	0.0305536	-0.00927832	0.0423606	0.000992558	0.020033	-0.000993242	0.0490583	-0.0371751	-0.0393664	-0.07125	-0.0286343	-0.0442768	0.0373039	0.00556707	0.00586215	-0.0324995	-0.0224045
TBL3_Q12788	-0.0441846	-0.117025	-0.0112713	-0.0645981	0.0938277	-0.0913939	0.0111839	0.0373711	-0.0281768	-0.0149142	-0.0760373	0.0240569	0.0256517	0.071774	0.0181215	0.0339627	-0.177729	-0.0174141	0.0229672	-0.0345374	-0.0215633	-0.0257268	-0.0365912	0.00183404	0.115922	-0.0608799	0.241877	0.189954	0.0381489	-0.00183637	0.0062915	0.0663862	-0.0267683	-0.0335283	-0.0124303	-0.0637487	-0.0278675	-0.0100197	0.0480846	0.0394433	0.0537975	0.0555208	0.140657	0.127514	-0.00041266	-0.091046	0.0651425	0.000412542	-0.0702758
CELF2_O95319-3	-0.0716439	-0.0898292	-0.0375904	0.04045	0.0421262	-0.14087	0.0199375	0.00812229	0.0455715	-0.0912837	0.00296747	0.0908915	-0.0811842	0.0378339	-0.00297358	-0.00613233	-0.041518	-0.198545	0.10932	-0.00815082	-0.066382	-0.0211928	-0.0179048	0.00810503	0.051675	-0.301566	0.11035	0.111971	-0.114603	0.0609446	0.166542	0.038836	0.0694182	0.00845724	-0.00850711	-0.0352954	0.0702895	0.166946	0.0339257	-0.104004	-0.0527156	-0.031225	-0.0559637	-0.0197087	-0.0497337	0.021486	0.0542215	0.0180421	0.0310745
CELF1_Q92879-4	0.0498484	-0.0698342	0.00660929	0.141191	0.171546	-0.00663971	0.0440367	0.0169966	-0.0355384	-0.0226693	0.0404906	-0.0986638	-0.0704613	0.0454396	-0.113557	-0.0384128	0.0449381	0.00425989	-0.112103	-0.0216265	-0.0263774	0.0858605	0.203221	0.154405	-0.114232	-0.0800715	0.0524173	-0.115423	0.00543218	-0.0042725	-0.135551	0.0124231	0.0559352	-0.0027928	0.0683086	0.0644321	-0.0608556	0.0566968	-0.0535873	0.17211	0.0110026	-0.0182494	0.0027874	0.0842375	-0.0514934	-0.0392192	-0.0805403	-0.174258	-0.00928343
MRPL12_P52815	-0.274267	-0.0570766	-0.01671	0.0478108	0.0216519	-0.0231106	-0.052684	0.0165186	-0.34955	0.0891424	0.100537	0.0895866	-0.0700132	0.0370733	0.0358256	-0.0470822	0.0227973	-0.158586	-0.0284377	0.281967	-0.0644487	-0.0231634	-0.202863	0.200507	-0.169469	0.171571	0.195858	0.170482	-0.0865085	0.325135	-0.0359565	0.302963	-0.255959	0.076731	0.0247047	0.00465457	0.150172	0.00216801	-0.00179724	0.131613	-0.734921	0.00179501	-0.0875861	-0.107897	-0.07115	-0.00866303	-0.0815327	0.0543792	-0.278236
SLC25A10_Q9UBX3-2	-0.0669044	-0.114169	-0.0352382	-0.00959376	0.0451939	-0.0473942	0.0222653	0.0111264	-0.00368325	0.0461994	0.000926836	0.0460274	0.0141967	-0.000927432	0.00867784	-0.0153584	-0.0492174	-0.117952	-0.031166	-0.0829678	-0.021461	0.0421296	0.0211464	0.041332	-0.0701464	0.112184	0.191836	0.0748682	-0.0219292	0.0570374	0.0412468	-0.116884	0.0244744	0.0469575	0.0125183	0.0188696	-0.000268709	-0.0245636	-0.0154924	-0.0512831	-0.0911893	0.0164638	-0.0857994	-0.0515484	0.00947425	0.00161236	-0.0187224	0.000268659	-0.0826295
ANAPC2_Q9UJX6	0.0151122	-0.0659331	0.044491	-0.00114396	0.0769165	0.306054	0.00114305	-0.0979445	-0.0131961	0.0126937	0.281124	0.00716581	-0.0424305	-0.0485137	-0.00218113	-0.0318504	-0.0390492	-0.0395815	0.00696906	0.022577	0.10874	0.0401042	-0.0333251	0.0819272	-0.0615308	0.00851471	0.00286921	-0.00586008	0.0457943	-0.134111	-0.00287493	-0.0333441	0.0848148	-0.00162426	-0.00984525	0.000425428	0.0325772	-0.000566662	-0.00827917	0.0332463	-0.0239653	0.00764779	0.0336643	0.0366793	-0.000425554	-0.0980621	-0.0547943	0.0145045	0.0604667
KRT10_A0A1B0GVI3																	-0.237185	2.68606	-0.0633581	0.0666682	-0.0197334	0.151293	0.0825533	-0.118278	0.0407768	0.112186	0.0194671	0.0708704	-0.0638134	-0.132437	-0.587494	-0.0766959
MLKL_Q8NB16																	0.0724165	-0.0288661	-0.0586002	-0.0795775	-0.00426346	0.152271	0.171394	0.14045	0.0042509	0.0540158	0.106789	0.0144481	-0.106503	-0.212501	-0.0468229	-0.131733	0.00984643	0.00760806	0.244368	-0.150336	-0.0495131	0.146865	-0.171008	-0.279784	0.262571	0.445177	0.0455328	-0.199771	-0.317732	0.411404	-0.56105	-0.00764839
NFXL1_Q6ZNB6	0.0260265	-0.0833725	0.000309347	0.0728889	0.0306562	-0.0405983	-0.0556347	0.0322646	0.0423059	-0.0116417	-0.0536899	0.0156471	0.00710056	-0.000309414	-0.0353905	-0.0109622	-0.017803	0.0159085	-0.0476506	0.0517622	0.0261184	-0.101756	0.00475638	-0.0176113	-0.0870476	0.0619103	0.0371432	-0.0489948	0.153488	-0.00477211	-0.0153694	0.00998674	0.0392512	0.0814548	0.00271952	-0.00225747	-0.0622656	0.00225394	0.0178402	0.0125491	-0.0490819	-0.0294519	-0.0730427	-0.0407883	-0.0317583	-0.10096	0.0249377	0.00403937	0.0761689
SIPA1_Q96FS4	-0.00454099	-0.109431	-0.034661	0.0195885	0.00792082	0.0262418	-0.0784454	0.0514904	-0.0526398	-0.0445647	-0.0135636	0.00452674	0.0243391	-0.0714151	0.073772	0.069483	-0.0691592	0.105564	-0.110799	0.0277322	0.0449483	-0.00154596	-0.0161425	0.0984787	-0.0222421	-0.038465	0.0208629	-0.0604137	0.07409	0.00154431	-0.205391	0.0337914	0.0792481	0.122174	-0.0277393	0.0348686	0.0357109	0.00565133	-0.00567355	0.0551336	-0.0649331	-0.0226382	0.00634542	0.0142853	-0.0414973	-0.0100175	-0.0733759	-0.0187307	0.0890278
SMARCC1_Q92922	0.010193	-0.0653977	0.0674653	0.0955145	0.106704	0.0166997	-0.0459138	0.0408902	-0.0426832	-0.063591	-0.0906447	0.141144	-0.0102656	0.0970294	-0.140576	-0.0788939	-0.0214532	-0.0382328	-0.0226953	-0.0241492	0.204296	0.152408	0.0648899	-0.0055647	-0.0473663	-0.0244303	0.0973707	0.0810214	0.0876983	0.00554332	-0.0360464	0.0380671	0.00987964	-0.00121566	0.013757	-0.0229983	0.0278122	0.0930805	0.00121464	0.153394	-0.00492774	-0.0389414	0.128946	-0.018761	-0.0103468	0.0206995	-0.0835559	-0.218515	0.0754638
SMARCC2_Q8TAQ2	0.0100825	0.353023	0.00883321	0.121975	0.139977	-0.0178539	-0.0611815	-0.0583664	0.0986191	-0.14888	-0.00888763	0.157181	-0.032623	0.0814377	-0.06956	-0.166506	-0.0364904	0.0688051	-0.240198	-0.055901	0.126961	0.0784063	0.0481369	0.0185595	-0.02311	-0.0736452	0.0832105	0.0578361	0.0495974	-0.125401	-0.0188014	-0.0767207	-0.053136	-0.0753842	-0.00106261	-0.095247	0.00106182	0.0307348	0.0311762	0.0884481	0.053427	0.00217625	0.15555	0.233771	-0.0374216	-0.105658	-0.0962281	-0.0913713	0.110386
HARS_P12081	0.0398839	-0.0826622	0.0138776	-0.00101996	-0.0233059	-0.0176624	-0.0261642	-0.113648	-0.00554232	0.00101924	0.0118611	0.0155331	0.0208633	0.00342152	0.0303044	-0.0207481	0.0478412	-0.00136165	-0.00510935	0.0246848	0.00520165	-0.0157464	0.00136037	-0.0146088	0.0417945	0.0632633	-0.0268761	-0.0180314	-0.0438355	0.0203266	-0.00746097	0.0149533	0.0210008	0.00895136	0.0200343	-0.00182467	0.0185525	-0.019091	0.0321138	-0.0563825	-0.0157849	-0.0372694	-0.0417337	-0.0305034	0.00182237	0.0411814	0.0270016	-0.00229131	-0.0214574
HARS2_P49590	-0.0592543	-0.0998693	-0.0546151	0.0321274	-0.000833971	0.00815256	-0.0159915	-0.0417704	-0.0160873	0.0435335	0.000833489	0.0129969	0.0991328	-0.0263104	0.0623942	0.0217228	0.00749332	-0.016134	0.0609757	-0.00394308	0.0370451	-0.132837	-0.0750271	-0.109457	-0.013833	-0.00648114	0.0704357	0.0836771	0.00393234	-0.044014	0.0455846	0.0614096	-0.000614458	0.00693261	-0.0128843	0.0894018	-0.00235993	-0.0427906	-0.0180083	0.00796194	-0.00604043	-0.0105909	0.000614197	0.0719921	0.057935	0.0381319	0.0406129	-0.0370188	-0.0116987
ATXN2_F8W0B5																	0.393258	0.00271061	0.356439	0.0308727	-0.00271571	-0.305816	-0.0509075	0.109653	-0.279588	-0.265525	-0.441018	-0.162538	-0.526647	0.0747469	0.0881747	0.560901	-0.0908198	-0.00121371	0.151102	0.250858	-0.135322	-0.113896	-0.0717014	0.0377721	-0.236427	0.0755448	0.0677323	-0.0964787	0.00121269	-0.0597911	0.224049	0.0807005	-0.0160028
ATXN2L_Q8WWM7	0.00675511	-0.0568231	-0.0186117	0.0276469	0.0202734	-0.00678689	-0.0205086	-0.0703441	-0.0138199	0.0159447	0.0101666	-0.0119597	0.0111572	0.0143986	-0.0153913	0.00994462	0.0539926	-0.00173411	0.0120122	-0.026219	0.0188843	-0.0102457	0.0215886	-0.00233877	0.0558518	0.00173203	-0.0180772	-0.0405638	-0.0398031	-0.0342536	0.0239728	0.0187228	0.00579711	-0.0325684	-0.0831298	0.0314277	0.0229445	-0.0407285	-0.0390275	-0.0426381	0.0368834	0.00400561	0.0250275	-0.0315174	-0.00401676	0.0213649	-0.022545	0.0088055	-0.0217282
ATXN2_Q99700	-0.00381019	-0.0674977	0.0194502	0.00934756	0.0183388	-0.112222	-0.0692615	-0.0732982	0.000546787	-0.0135604	-0.0549278	0.0410974	0.0159741	0.0364519	-0.000546995	0.00831321	0.048089	0.0362269	0.0237354	-0.00971747	0.035421	0.0363979	-0.0467863	0.0116682	0.0232427	0.00642146	-0.0402533	-0.0400089	-0.0169606	-0.00817108	-0.038361	-0.00645017	-0.0681422	-0.0081792	-0.0910119	0.0171022	0.0409819	-0.0300471	-0.0189641	0.000462591	-0.0213182	0.00134353	0.0441879	0.0144591	0.00893368	0.0192806	-0.000462739	-0.0454056	0.00302089
ATXN2L_H3BUF6	0.123834	-0.12175	-0.171295	0.00936125	0.0858312	0.00575557	0.0217286	-0.0970474	0.0973996	-0.0370468	0.0423594	-0.121818	-0.0265154	-0.0506938	-0.00577863	0.039349	-0.0163355	0.449273	-0.502877	-0.214543	0.0697566	-0.312573	-0.147848	0.450765	0.01175	-0.0833485	0.286584	0.141982	0.569696	-0.0118465	0.114101	-0.268216
ACAP2_Q15057	-0.0176909	-0.0179743	-0.00116264	0.0011617	0.0121108	0.0345216	0.0114937	0.173919	-0.00700504	-0.00456686	0.0241628	0.0490782	-0.0143864	-0.00973837	0.0100268	-0.0285344	0.0128594	0.00237558	-0.0703009	-0.0467696	0.0494481	-0.0502091	0.0481871	0.0562061	-0.0662949	0.0276758	0.0569332	0.0690966	-0.0260513	-0.114868	-0.0023795	-0.0279766	0.0175097	-0.00119852	-0.146234	0.00119752	0.0270427	-0.0290263	0.00763046	0.0118275	-0.0637159	-0.00335975	0.0206093	0.0257915	0.0465107	-0.0235432	-0.129971	-0.00617211	0.0998796
XRN2_Q9H0D6	-0.0348717	-0.0679365	-0.0950021	0.0203744	0.0131453	-0.046177	-0.00152397	-0.0123139	-0.0387117	0.0448253	0.0165306	0.00152237	0.00833255	0.10204	0.0648586	-0.0299788	-0.014711	-0.0371669	0.00224377	-0.0343186	0.0263125	0.0233726	-0.0893955	-0.0490704	-0.000514738	-0.0501667	0.0184731	0.0753514	0.000514555	-0.012556	0.0504254	0.0911515	-0.047982	-0.0377851	-0.0219849	-0.0350467	0.00288421	-0.0691199	-0.0517255	-0.00288999	-0.0121929	0.143661	0.114396	0.148366	0.121266	0.0897837	0.0462966	0.124094	-0.0314758
HEBP1_Q9NRV9	-0.00682258	-0.0234539	-0.0480621	0.0203202	0.0497966	-0.106803	0.154444	0.00679046	-0.0766096	-0.0745476	-0.133363	-0.0591673	0.112787	0.00681845	0.318297	0.221537	0.21538	0.150641	0.268674	0.396908	0.0111316	-0.206163	-0.168056	-0.0886725	-0.0112181	-0.127535	-0.0898567	-0.127768	0.461754	0.399343	-0.0192609	0.157236	0.0877027	0.0316497	0.179683	0.0469106	0.010749	0.0242279	0.0614751	-0.0299005	-0.0108297	-0.0159291	-0.0661069	-0.0196326	0.0243846	-0.0117295	-0.0265143	-0.0170954	-0.0139366
TRIM32_Q13049	-0.0621174	0.000223569	-0.0167894	-0.0127681	0.0329697	0.115907	-0.00389939	0.0111293	-0.0261625	-0.000223603	0.0511321	0.0737699	-0.0294319	0.0482699	0.0235099	-0.0483144	0.0738584	-0.018428	0.137162	-0.00207199	-0.0321776	-0.0543841	-0.100786	0.0182254	0.00218297	0.00206902	0.00373557	0.0807789	-0.0858854	0.0745509	-0.0933202	-0.0332259	-0.0473045	-0.0817842	0.24501	0.371772	0.0829761	0.0400444	-0.158938	-0.0680979	-0.189407	0.0551962	-0.0131594	0.183654	0.112586	-0.0124075	-0.0216409	0.0123017	-0.103314
CEP250_Q9BV73	0.157197	-0.0210521	-0.030476	-0.0170307	0.155427	0.0888664	-0.363545	-0.513261	-0.120249	-0.328304	-0.188415	0.117147	0.0676445	0.0676292	0.231298	0.016832																	0.0646858	0.0832819	-0.0584021	-0.00753579	-0.102464	-0.0461283	0.00749663	0.255834	-0.0706149	0.153137	0.0216552	-0.145849	0.0831974	0.0251128	-0.133675	-0.00874536	-0.0583962
SAMD4B_Q5PRF9	-0.0254647	-0.0166486	0.136938	0.17673	0.0992702	-0.116024	-0.434459	-0.438213	0.0602679	-0.167117	0.0839966	0.164878	0.0164587	-0.0648439	-0.174305	0.387397	0.122502	0.0867924	-0.00962496	-0.0790967	0.105829	-0.244737	0.180204	0.0703519	0.0697514	-0.0762006	-0.322692	-0.294277	-0.0653807	-0.204846	0.00956117	0.0370621	0.157575	-0.0602917	-0.0296294	-0.114181	0.000331066	-0.0548849	0.0412766	0.102471	0.0304798	0.0611679	0.0184248	-0.000331142	0.135553	-0.018956	-0.0612957	-0.0571607	0.112381
SAMD4A_Q9UPU9																																																	0.161267
SYMPK_Q92797	0.151785	0.0267971	0.0811568	0.00236468	0.105495	0.154946	-0.0776401	0.023507	-0.0838724	-0.105319	-0.00236856	0.068753	-0.0545151	-0.12018	-0.221693	-0.0319126	0.171932	0.00152019	0.238162	0.0718245	0.102233	0.118134	0.0351583	0.0367675	-0.00763893	-0.0161281	-0.233466	-0.0483094	-0.0854011	-0.22469	-0.00152179	-0.0501284	0.139858	0.126168	0.00579846	-0.0399558	-0.0126628	0.0803702	0.0101852	0.129317	0.0137611	-0.00668618	-0.00582185	-0.0463216	-0.00667693	0.0458282	-0.174153	-0.226428	0.154391
CIT_O14578-4	0.0701552	-0.0600405	0.0283108	0.0654823	-0.0774318	0.19203	-0.0696235	0.0489716	0.152635	-0.0288775	0.219025	0.0416983	-0.0648855	-0.048661	-0.0382361	-0.0713556	0.0314845	0.0199431	-0.0223479	-0.0654965	0.0771896	0.0050134	0.0620207	0.0783902	0.0806358	-0.0314239	-0.0606759	-0.00503088	0.0878221	-0.0903616	-0.0138425	-0.0524271	-0.0801934	-0.0512152	0.0255047	-0.0135157	-0.0349092	0.0390639	-0.00890483	0.00345031	-0.0322093	0.0627852	0.0831073	0.0773152	0.0384651	-0.0202846	-0.00345858	0.0047597	0.0579755
PEX26_Q7Z412																	-0.0173832	-0.0810921	-0.0470381	-0.0194332	0.0342319	0.0171763	0.0266957	0.0206154	-0.114229	0.120811	0.112952	0.0219427	-0.0910835	-0.0387863	0.0315398	-0.0999539	-0.0481751	-0.198286	-0.0413308	0.065615	0.188689	-0.0359586	-0.10866	0.140174	-0.311186	0.00460969	0.0278048	0.112144	-0.00462446	0.0506597	-0.163073	0.0465487	0.00683345
PRXL2A_Q9BRX8	-0.130617	-0.153148	0.351976	0.044274	0.341909	-0.158374	-0.128808	0.0179914	-0.0182186	0.143781	0.0740527	0.0531436	-0.0726422	-0.133051	0.179692	-0.108804	-0.49337	0.254422	-0.521464	0.156568	0.410081	-0.274259	-0.177774	-0.155012	-0.0458194	0.0500715	0.103566	0.418842	-0.469374	0.0444089	-0.243604	0.530139	0.0167495	0.0486885	-0.0885518	-0.010044	-0.0309486	0.111677	0.104825	-0.0889124	0.0566365	-0.0754375	-0.0760117	0.048962	0.0594354	-0.146709	-0.046638	0.00997455	-0.627574
SFSWAP_Q12872-2	-0.188151	-0.0170341	-0.246545	-0.134269	-0.059164	0.0382249	0.124086	0.153724	0.0285558	0.0153724	-0.0155379	0.0632298	0.101007	0.115319	-0.107162	-0.126182	0.00602038	0.100675	-0.0693506	0.0866903	-0.0632155	-0.0411096	0.0186002	-0.00389779	0.00377663	-0.0334103	0.0112293	-0.0109377	-0.0602746	-0.00378654	0.0444804	0.0809827	0.178035	-0.0198517	0.0387391	-0.065387	-0.0243348	-0.0571677	0.172435	0.14299	0.0195822	0.0408887	-0.186825	-0.157301	0.0556558	0.113458	-0.139038	-0.112197	-0.156487
EXOSC7_Q15024	-0.0107373	-0.132732	0.00129234	-0.0263549	-0.0107164	-0.041329	0.0137618	-0.0816233	-0.0347497	0.0400276	0.00595865	0.061186	0.0425248	-0.0012935	0.0717048	0.0310906	0.00501188	-0.0354611	0.0308355	-0.00304001	-0.00465903	-0.0814183	-0.0239677	-0.079918	0.000805977	0.0193261	-0.0130538	0.0295682	0.0283224	0.0712987	-0.000806427	0.0467673	-0.0351822	-0.0212168	-0.0497113	-0.0309574	-0.0191232	-0.00577722	0.00575418	-0.0494248	-0.0559948	0.0485884	0.0264257	0.0403529	0.0424352	0.0633533	0.0474394	0.0604385	0.0117269
ERMP1_Q7Z2K6	-0.0351339	-0.0728834	-0.0390741	-0.0028617	0.00285603	0.0126263	0.00519464	-0.0692607	-0.0659243	0.020004	0.0043428	0.0462882	0.0704225	-0.0170648	0.0592407	-0.0196897	-0.0217614	-0.00844576	0.00214658	0.000351268	0.00230989	-0.06635	-0.0696922	-0.0616612	-0.000351354	0.0328908	-0.0115495	0.0492801	-0.00470602	0.0251397	0.00936508	0.0152786	-4.72262e-05	-0.0258646	-0.0151976	0.0566305	0.0348822	0.0189938	0.0447023	-0.0506008	-0.0743416	-0.0390587	-0.0534978	-0.0538278	4.72246e-05	0.0407057	0.00688192	0.0127759	0.0517248
PKLR_P30613	0.0501276	-0.0785411	-0.0118948	0.014955	-0.0022986	0.0398749	-0.00508445	-0.0798323	0.00229495	0.0157262	0.00264486	-0.00427473	0.039002	-0.0170331	0.0345466	-0.0105933	0.106964	-0.00833716	0.0248895	0.0147861	0.010903	0.0202082	0.00138063	-0.0271087	0.0631272	0.0436966	-0.0628166	-0.0745994	-0.0659753	-0.0108257	-0.00138195	-0.0126414	0.0196396	0.0132812	-0.00537837	0.0328074	0.0468588	0.010033	0.0422708	0.0053584	-0.0125972	-0.0335827	-0.096765	-0.0675041	0.0185541	-0.0061725	-0.0126134	-0.0446072	-0.0257019
PKM_P14618	0.0404384	-0.068723	-0.0280697	0.0051739	-0.00360012	0.0334064	0.0163597	-0.061566	-0.026696	0.0186019	0.00359116	-0.00953027	0.0184723	-0.0264894	0.0176577	-0.0333468	0.0349871	-0.00658877	0.0250237	0.0270264	0.0209986	-0.0398756	-0.0060426	-0.018636	0.0393009	0.0060174	-0.0136683	-0.0196517	-0.0350633	0.00974583	0.0249105	-0.0386752	-0.00654826	0.00433565	-0.0109621	0.0411238	0.0573684	0.00710346	0.0382814	-0.0465221	-0.0247515	-0.028897	-0.0348898	-0.052517	0.018909	0.032474	0.00261399	-0.00261874	-0.0437192
PKM_P14618-2	-0.000671068	-0.387606	-0.00967877	0.000670756	0.106175	-0.307073	-0.284581	-0.0260371	-0.0437781	0.0828542	-0.436643	0.0765034	0.220516	0.222491	0.00995548	0.116988	-0.0198156	-0.0268661	0.0267348	0.190834	-0.393227	0.00405205	-0.0507631	0.108717	-0.0463875	0.0559492	-0.00406347	-0.0872279	0.0589535	0.203978	0.112945	-0.125282																	-0.152003
PKLR_F8W6W2	0.470526	-0.122248	0.164882	-0.304327	0.34598	0.423514	0.0691142	-0.296464	-0.170302	0.0591502	-0.0589304	-0.00384574	0.0836059	-0.00941653	0.00383551	-0.0251931
UMPS_P11172	-0.000900606	-0.0897302	0.00455215	0.0156018	0.0238883	-0.0214643	0.00371194	-0.0580939	-0.0233869	-0.0141442	0.000900044	0.0236635	0.0432779	-0.0140276	0.0206467	-0.0209629	0.0302705	-0.0383631	0.0120897	0.0543605	0.0324999	0.00301409	-0.04306	-0.0262005	-0.0030204	-0.019598	-0.0834524	-0.065054	0.0273989	0.0318791	0.0207514	-0.00986799	0.0474768	0.0283092	0.0310253	0.00929413	0.006015	-0.00071813	0.000717773	-0.0630003	-0.0064297	-0.0191417	-0.0691799	-0.0641511	0.000816986	0.0195813	-0.0293469	-0.0372232	0.0259281
FDXR_P22570-7	0.0688238	-0.043803	0.0016405	0.0692378	0.0370189	0.0325673	0.0230556	-0.0480387	-0.00164236	-0.0405599	-0.121716	-0.137658	0.0584837	0.0344057	-0.0565332	-0.0824574	0.291503	0.130774	0.22178	0.17951	0.104813	0.0628363	-0.17471	-0.149989	0.210489	0.0464727	-0.312914	-0.461454	-0.0801727	-0.0480197	-0.103337	-0.184	0.00565293	0.0169109	-0.0627032	0.0162364	0.100922	0.111276	0.0271871	0.0156343	-0.031386	-0.0699747	0.036497	-0.0572454	-0.00567517	-0.0137887	-0.081808	-0.0342649	0.136283
HCLS1_P14317	-0.0032048	-0.066238	0.0195362	-0.000122331	0.0104773	-0.0228753	-0.0189272	-0.0901749	-0.0133582	0.000122321	0.0287875	0.0645045	0.0390675	-0.0129437	0.0435645	0.035399	0.0605649	-0.0465375	0.0727257	0.0446602	-0.0375243	-0.0784041	0.00714297	-0.0951969	0.0516962	-0.00330311	-0.11348	0.00329557	-0.0520687	0.0560652	0.0828597	-0.0317417	-0.0450008	-0.000587515	-0.0522601	0.0247717	0.0792988	0.00153518	0.0495703	-0.0443104	-0.0515687	0.00237186	-0.0491548	-0.0141517	0.000587275	0.0574809	0.0258807	-0.0135831	0.0156875
SNAPC5_O75971	-0.501818	-0.0296434	0.243343	-0.0845159	0.000661969	-0.275664	0.0798003	0.265632	-0.2453	0.34704	-0.0171298	0.223957	0.443827	-0.529358	-0.000662273	0.155963	0.0422249	-0.0277803	-0.126876	0.0263084	-0.251701	-0.0553564	-0.149895	0.00475109	0.0694597	0.0506463	-0.00476679	0.14751	0.0444079	-0.0193998	-0.118397	0.0507202																	0.0173321
NAA10_P41227	0.0215679	-0.0483873	0.026967	0.0303702	0.00297236	0.0271168	-0.00519813	-0.0482199	-0.00299009	-0.00826764	-0.0968985	-0.0716999	0.0134978	-0.0029785	0.0374096	0.00449948	0.176293	0.0784861	-0.00720501	-0.00209808	-0.00877482	0.082041	-0.00672626	0.042725	0.09557	0.0610423	-0.0670333	0.038671	-0.0616936	-0.025994	0.000350348	-0.000350433	0.0269045	0.00349965	0.0176128	0.0360263	0.0228968	0.0583428	0.0107124	0.00251183	-0.00251621	-0.0564975	-0.0530622	-0.0739415	-0.0428861	-0.0297749	-0.0886594	-0.046763	0.000250918
NAA11_Q9BSU3	-0.130541	0.321518	-0.0318008	-0.0212123	0.103717	-0.210189	-0.00316168	0.00315476	0.0718824	0.0741122	-0.262384	-0.150797	0.0938542	0.00449713	0.0569953	-0.0391689																	-0.140776	0.0370078	-0.00923983	0.213244	0.0187883	0.0656321	-0.0102183	-0.0344997	-0.0963303	-0.0437795	0.163602	0.00918103	0.100759	-0.198672	-0.0998392	0.0240291	-0.0526691
CSTF2T_Q9H0L4	-0.0373414	-0.0867766	-0.0515963	0.00740889	0.00998069	0.0262245	-0.00537314	-0.0319343	-0.0588709	0.00218453	0.0340977	0.025066	-0.00218784	-0.0480397	0.00687511	0.0179907	0.0643862	0.0411272	0.0502713	-0.0229169	0.071632	-0.0405447	-0.0405827	-0.00849687	-0.001675	-0.090983	0.159381	0.069353	-0.0126708	0.00167306	0.0881464	-0.00814804	-0.092226	-0.0035594	-0.0226761	-0.0131899	0.0639759	0.00935597	0.0143965	-0.0338338	-0.175768	-0.0878993	0.03134	0.086881	-0.00012602	0.000126009	0.0386588	0.0776534	0.012572
CSTF2_P33240	-0.00775858	-0.0861814	-0.104061	0.0198994	0.0209721	-0.00196233	-0.0152229	-0.0849878	-0.0426745	0.0488604	0.0457086	0.0572271	0.0228512	-0.00680446	0.0313019	0.00195967	0.0946628	0.000113175	0.103483	0.0355088	-0.0858431	-0.0742263	-0.106071	-0.0165541	-0.0293489	-0.0968772	-0.0412738	0.0335423	0.0956597	-0.000113184	0.0291305	0.0531856	-0.0836936	-0.00240301	-0.0459244	0.0236728	0.0662794	0.0132399	-0.0116035	-0.00732323	-0.209428	-0.0596767	0.0110801	-0.0958117	0.0400281	0.00239902	0.00739655	0.0827743	0.0812064
STARD3NL_O95772	-0.0153999	0.0325126	0.0332708	-0.0875595	0.0236378	0.00507107	0.0360088	-0.0146277	-0.0435596	-0.00885255	0.0731065	0.0222057	-0.0362432	-0.0090627	0.0595828	-0.00508896	0.167646	0.0264572	0.0125756	0.0361744	0.0640375	0.00994092	0.0452151	-0.0620014	0.00455413	-0.0285845	-0.29036	-0.452012	-0.16337	-0.115696	-0.00456855	-0.0234133	-0.197245	0.0816061	-0.127534	0.0323207	0.00916235	0.0418114	-0.00922091	-0.0996433	-0.0723511	0.0747385	-0.0338788	-0.100231	0.022731	0.0556565	-0.0615954	0.0418025	-0.00945536
ZNF706_Q9Y5V0	0.0576313	-0.122724	0.0558799	0.0230469	0.0330849	-0.0183307	-0.0566902	-0.103878	-0.0542644	-0.0113883	0.00899499	0.0403394	0.0209093	-0.00905143	0.012206	-0.0186207	-0.0369589	-0.129863	-0.137036	-0.0988099	-0.00422218	0.0712217	0.0948823	0.0664295	-0.0272935	0.125166	0.0601825	0.0340188	-0.0629354	-0.0929347	0.0412081	0.00420986	0.0664813	-0.00466338	0.0276103	-0.0484135	-0.130729	-0.0659763	0.0598647	-0.0392715	0.0428642	0.0521045	-0.0635203	-0.05115	-0.00877845	0.00974855	0.00464835	0.0339793	-0.0713991
UAP1L1_Q3KQV9	0.0779412	0.0155958	0.00947752	0.00283882	0.0234613	0.0551323	-0.00284442	-0.0762888	-0.0488881	-0.051105	-0.0125097	0.0224999	0.0318867	-0.0484404	-0.0187604	-0.047562	0.0253005	0.0523198	-0.0248993	-0.00259161	-0.00513562	0.0448326	-0.0915971	0.00258697	0.0387382	-0.158022	-0.0460914	-0.0211451	-0.182992	0.0133246	0.085296	0.0378026	0.105633	-0.0711312	-0.0414286	0.0806298	0.263171	0.00552564	-0.0355584	-0.0394431	-0.0520815	-0.0098082	0.124471	0.0693975	-0.00554689	0.00929812	-0.0604362	0.159805	-0.00142672
UAP1_Q16222	0.0567593	-0.0136448	0.0202237	0.0209032	0.017032	0.0240523	0.0292561	-0.00910159	0.00183285	-0.0220416	-0.0702759	-0.0259545	0.0179117	-0.0056124	-0.00183518	-0.0127742	0.123648	0.0769789	0.0802422	0.0380847	0.0276041	0.040974	-0.0183746	0.00331615	0.0527257	-0.0112922	-0.0515011	-0.00741406	-0.0825871	-0.00332379	-0.0672547	-0.064986	0.109089	0.091927	0.110362	0.0303152	0.00810997	0.0737039	0.0575118	0.0175793	-0.00815582	-0.0702067	-0.122293	-0.109798	-0.0125468	-0.0538111	-0.0749127	-0.0454857	0.0738116
CCDC43_Q96MW1	0.0390954	-0.0575218	0.025526	0.0342949	-0.0280087	0.0456257	0.0035796	-0.0617033	-0.0109134	-0.0035885	0.0737491	0.0480839	-0.0112832	-0.0807376	-0.0173711	0.00572885	-0.206615	-0.0799456	-0.0801676	0.00738233	0.0156112	0.0143728	0.0800122	-0.0074203	-0.0187374	-0.0915779	-0.0131586	0.145834	0.0365914	-0.0720588	0.132441	0.0141328	0.082889	0.0373688	0.0782213	-0.0247711	-0.00814795	0.0466788	0.0698086	0.0503842	0.00810219	-0.0948668	-0.219692	-0.156114	-0.0155124	0.016295	-0.121471	-0.0951455	0.0276089
WASL_O00401	0.0709611	-0.0625561	0.0356477	0.0313835	0.111688	0.0717932	0.0656315	-0.0429917	-0.0810383	-0.0420675	-0.0692259	0.00217134	0.0527961	-0.00217462	-0.0197961	-0.0659755	-0.121164	0.0789144	0.0802933	0.0184096	0.124592	-0.0275951	0.0360742	-0.14913	0.0912166	-0.182427	0.0971167	-0.240868	-0.124365	-0.230104	-0.0131123	0.0129942	0.0587574	0.00964146	0.0222819	0.0195738	0.0476114	-0.00970633	-0.0732768	-0.0617544	-0.151486	-0.120862	0.0100595	0.0615969	0.0172422	-0.158465	-0.0931554	-0.0395526	-0.0834379
UBE2O_Q9C0C9	-0.0393032	-0.154898	0.0489672	0.010325	0.0790904	-0.0156005	0.052693	-0.0340114	0.000110993	-0.000111001	-0.00487824	0.0250198	0.0598742	-0.0453804	0.0291524	-0.0162552	0.138093	0.0403716	0.0423782	-0.0322061	0.0490991	-0.00180252	0.00791225	0.0207545	0.0139893	-0.0528498	-0.151984	-0.14056	0.00180027	-0.124448	-0.0332256	-0.0533488	0.024464	0.00620364	0.061547	0.0938706	0.0717108	0.0732392	0.000225445	-0.000961139	-0.0671315	-0.108503	0.0114393	-0.0188569	-0.000225481	-0.0485756	-0.0233881	-0.0648633	0.0600173
SPTAN1_Q13813-2	-0.0916043	-0.0770095	-0.0394983	0.0201743	-0.038565	-0.0804355	0.100813	0.0310896	-0.0166791	0.0741478	0.041306	0.0568962	0.0371477	-0.012211	-0.00886846	0.00881428	0.0191594	0.000121648	0.0741588	0.0396973	0.0199755	-0.0122484	-0.0556782	-0.0275664	-0.000121658	-0.0229397	0.0761846	0.114529	-0.00095616	-0.0330114	-0.0199951	0.0331925	0.00889603	-0.0315078	0.0824714	0.154472	0.00186414	-0.0257076	-0.0231269	0.0228099	-0.0325313	-0.00969754	0.00909177	-0.00186655	0.089954	0.0373995	-0.0418758	-0.0471836	-0.00348115
SPTAN1_Q13813-3
RPP30_P78346-2	-0.00948093	-0.158876	-0.0118866	-0.00232963	0.00232588	-0.0810154	-0.024519	-0.0536033	0.0792124	0.056766	-0.0561367	0.0412734	0.0688791	0.0344711	0.0439198	0.0484913	-0.135189	-0.022326	-0.11106	-0.0541954	-0.0425379	0.0230929	0.000121473	-0.0480462	-0.000121483	0.0587812	0.0184218	0.0881091	0.114877	0.131354	-0.0399474	0.00498356	-0.18655	-0.127618	-0.11254	0.0212427	0.0247724	-0.0842436	0.00219304	-0.0663693	-0.0439565	0.0232363	0.0265341	-0.00219638	0.0817279	0.0184652	0.046735	-0.0403138	0.0552592
RPP30_Q5VU11	-0.0238566	-0.0665125	-0.114352	-0.112806	-0.018389	0.0497473	0.0383943	0.10922	0.0364283	0.142104	0.0849144	0.0510984	-0.000662664	0.000662359	-0.158768	-0.0872434	-0.200839	0.255471	0.345991	-0.0870736	-0.271374	0.00143781	0.239943	-0.0578277	0.135873	-0.00143925	-0.173785	-0.240102	0.187615	-0.0668327	0.404461	0.0461038																	0.0270139
FHOD1_Q9Y613	0.068389	-0.139207	0.131264	-0.0424857	0.0254149	0.0520727	-0.161386	-0.213224	-0.0259488	-0.0184077	0.205661	0.0869065	0.133801	-0.112516	0.0181758	-0.0834939	-0.153123	-0.0383444	0.0116084	0.00772385	-0.0086142	0.0772423	0.0357648	-0.0455035	-0.15697	-0.175995	-0.166607	0.123391	0.153201	0.0562021	-0.00776542	0.194654	-0.0320917	-0.223425	-0.15866	-0.318191	-0.0784807	-0.0522993	-0.0338805	0.224201	0.122516	0.365026	0.630193	0.52904	0.0313933	-0.0997719	0.465811	0.118363	-0.0988255
EPRS_P07814	-0.0867664	-0.168068	0.0383554	-0.080941	0.0265358	-0.136973	-0.0228982	0.238602	0.095636	0.017873	-0.0180972	0.020077	-0.0918668	0.103536	-0.0551014	0.106333	-0.41779	-0.180173	-0.18376	-0.14491	-0.00914565	0.00777312	0.026476	-0.00249876	-0.172145	-0.180284	0.00249444	0.0940819	0.25079	0.0312831	0.0409881	0.233754	-0.222212	-0.201558	-0.193609	-0.28651	-0.214024	-0.195897	-0.0665126	0.165391	0.0190782	0.243104	0.460323	0.342374	0.0367783	-0.0193339	0.369465	0.0588063	-0.11737
QARS_P47897	-0.117224	-0.191267	0.1496	-0.0682619	0.125165	-0.147431	-0.00542935	0.423992	0.187458	0.005409	-0.0424013	0.0834081	-0.0840458	0.215655	-0.0381039	0.269528	-0.393331	-0.0858668	-0.175989	-0.102059	0.0325762	0.00525928	-0.0366334	0.0205417	-0.100711	-0.13884	-0.00527853	0.155466	0.300742	0.0954665	0.125344	0.22933	-0.248481	-0.33892	-0.133055	-0.355803	-0.252594	-0.209725	-0.0664914	0.195621	0.0143776	0.287134	0.476454	0.478988	0.0617193	-0.0145223	0.427049	0.0952683	-0.112171
SUPT16H_Q9Y5B9	0.164081	0.0278298	0.236923	0.136083	0.0824537	0.0637337	-0.0627054	0.0738707	-0.130794	-0.181532	-0.00721689	0.00718096	-0.138242	-0.139812	-0.287488	-0.189301	0.142555	0.0905425	0.00269258	0.0186268	0.177709	0.1773	-0.0223027	0.119513	-0.0547747	-0.00269761	-0.21466	-0.180865	0.0525344	-0.0998333	-0.104859	-0.073926	0.192036	0.107104	0.0911716	0.0540009	0.00237491	0.0427367	-0.0143345	0.221518	-0.102995	-0.0836456	-0.00237882	-0.183051	0.00869202	-0.019939	-0.263077	-0.454917	0.19294
GALNS_P34059	-0.0375391	-0.101062	-0.0206416	0.052974	-0.0976566	0.0160101	0.0451925	0.00256761	0.0477345	0.00210509	-0.0893201	0.00365315	0.12589	-0.0487863	-0.00210816	-0.0155932	-0.104484	0.0310778	-0.0436719	0.12782	0.0837218	-0.0715278	-0.0274356	0.0146076	-0.0584912	0.0983626	0.161155	-0.0866865	0.12011	-0.014757	-0.0549481	0.0693615	0.0630279	-0.031755	0.0357981	-0.0336506	0.00214881	0.0347882	0.0426975	-0.00215202	-0.0507402	0.0935622	-0.146551	0.0322233	-0.0595405	-0.067984	0.0496732	-0.0163227	-0.102729
ARSA_P15289	-0.0529754	-0.00773363	0.178928	0.12036	-0.0723926	-0.268463	0.207642	-0.21458	-0.239278	0.166893	0.0076924	-0.0367394	0.0189549	0.196761	0.327207	-0.0890051	0.011227	-0.0976702	0.116168	0.173643	-0.0165561	-0.0184577	-0.0485669	0.0142846	0.0266713	0.0154759	-0.0526698	-0.0608212	-0.00499637	0.129105	0.00497912	-0.0183849	-0.106933	-0.00118799	0.0334211	-0.0313002	0.0697829	0.0323601	-0.0689983	0.101483	-0.0236057	0.047397	0.0382424	0.0924272	-0.0969693	0.00118701	-0.0239995	-0.116419	-0.0921576
IFNAR1_P17181	0.0338095	-0.0156181	-0.0785288	-0.290716	0.115723	0.0154508	0.0525194	0.0955242	0.105298	-0.313014	0.0983538	-0.34686	-0.431781	-0.174425	-0.138876	0.208479	0.181321	-0.00211109	0.0394579	-0.155208	0.00210801	0.0503303	-0.0324842	0.00579251	0.28822	0.0404489	-0.0947579	-0.0715677	-0.166272	-0.0716994	-0.163146	0.0927598	-0.0112365	-0.38605	-0.260505	0.147906	0.438997	-0.173842	-0.250134	-0.247241	0.283971	0.255027	0.0707766	0.0111497	-0.0116436	-0.0949983	0.12987	0.161758	-0.0305309
NLRP2_Q9NX02	0.00709361	-0.124691	-0.00257384	0.0134149	0.00151161	-0.00895183	0.0236338	0.0096319	0.0949891	-0.101995	-0.0015132	0.0635925	-0.130732	0.0196083	-0.128056	-0.0407459	0.111766	0.0894541	0.0437526	0.0691856	0.143281	-0.0115475	-0.0193663	-0.0573414	0.0759215	-0.0563095	-0.0507607	0.0114558	0.0515835	-0.131288	-0.0722142	-0.0162852	0.0185734	-0.0790842	-0.0288877	-0.099033	0.00214329	-0.00214648	-0.0781294	0.112433	0.0355384	0.0317564	0.175472	0.191048	-0.0276661	-0.0218083	0.018861	-0.0237418	0.0814355
BCCIP_Q9P287-2	0.0820644	-0.0265792	0.0338942	0.0190922	0.0114334	0.030785	0.00995496	0.0170991	-0.0366364	-0.0136841	0.0158823	-0.0108498	-0.0397829	-0.0100241	-0.0474848	-0.0154242	0.0195934	0.00929435	-0.0249736	-0.0163791	0.0331745	0.0324771	-0.00200805	0.0430676	0.00757258	-0.0252438	-0.030739	-0.025902	-0.0481555	-0.0467285	0.0428165	0.00200526	0.0110129	-0.00443692	-0.0459642	-0.0812106	-0.0274415	0.0305284	-0.000902005	-0.00373063	-0.0623871	-0.0245684	0.0589985	0.0649556	0.026519	0.000901442	0.000924519	0.0602637	0.0760989
BCCIP_Q9P287	-0.00327402	-0.143455	0.0305198	0.0359899	0.023504	0.0603143	0.046423	0.0491285	-0.0644777	-0.0133392	0.00326661	0.027523	-0.0725312	-0.053734	-0.0846706	-0.00371885	0.0610577	0.0821507	-0.0294789	-0.0180436	-0.0368859	0.127008	0.00691806	-0.0069514	0.0548323	0.0697249	-0.0334354	-0.0520977	-0.124799	-0.0604509	0.0199878	0.045766	-0.00292081	0.0221857	-0.0209836	0.00291491	-0.00303198	-0.0330286	0.00426359	0.0578107	-0.0814061	-0.0377421	0.0558065	0.0917837	-0.067864	-0.0551848	0.0890463	0.0402588	0.0456194
VMA21_Q3ZAQ7	-0.0389056	-0.0763787	0.103213	0.00672782	-0.057085	-0.0379363	-0.162281	-0.0164772	0.0535607	0.0108835	-0.0679023	0.0251489	0.0496765	0.0544989	0.132949	-0.00675934	0.157458	-0.0130578	0.297922	0.0926704	-0.314911	-0.137716	0.0129407	0.0260089	-0.080751	0.262486	0.489967	-0.0182386	-0.0185533	0.0602875	-0.206595	-0.107719	-0.0150412	0.0451133	0.223531	-0.0472213	-0.184637	0.194745	0.0869593	-0.268141	-0.156626	-0.32159	0.0835121	0.0334282	0.0373586	-0.0211113	-0.0571899	0.014886
VMA21_Q3ZAQ7-2	-0.0761956	0.00561684	0.0307804	0.0646367	0.0391596	-0.0805306	-0.147287	-0.0658212	-0.135797	0.041761	-0.00563879	0.127273	0.179086	-0.0652899	-0.128021	0.130523	-0.286277	-0.22366	-0.451414	-0.252045	-0.0865984	0.226638	-0.0173395	0.165328	0.00867348	0.23899	0.3946	0.243818	-0.00872594	0.258378	-0.0245775	0.0322298	-0.146324	0.1044	-0.00796577	0.0729169	-0.0310297	-0.180965	0.0567835	0.117758	0.0342959	-0.238787	-0.169262	-0.0977861	-0.00890321	0.00792203	0.0185487	0.136572	-0.25794
TTC37_Q6PGP7	0.0335172	-0.0566055	0.137248	0.0189832	0.115777	-0.115196	-0.00461822	0.0200494	-0.0652642	0.00460348	-0.145105	-0.0419988	-0.176416	0.0420137	0.114895	-0.0313198
HNRNPLL_Q8WVV9	0.0141533	-0.0289222	0.140425	-0.0142936	0.0414824	0.106037	-0.086387	0.016859	-0.0328726	-0.0591976	0.080813	-0.147998	0.101965	0.138275	-0.0846174	-0.126106	-0.0166482	-0.0497095	0.0504935	0.00555145	0.20943	0.253093	-0.0055729	0.142792	-0.0497358	-0.0439209	-0.256776	-0.0811178	0.062063	0.0913528	0.0608145	-0.127633	0.0999616	0.00530638	0.116386	0.000867093	-0.0600353	-0.0745538	-0.0825761	0.0766201	-0.0198494	0.0575189	0.00936031	-0.000867614	-0.0532319	0.0233601	-0.210519	-0.198358	0.0139383
HNRNPL_P14866	-0.164097	0.0599324	-0.0230863	-0.0357807	0.0367263	-0.0112772	-0.178567	0.134112	0.097622	0.0583326	0.0111898	0.217997	-0.0608375	0.138433	-0.187882	-0.0606168	-0.0696475	-0.00257524	-0.0415396	-0.196684	0.00257065	0.0105108	-0.0558415	-0.106582	0.0171281	-0.00739925	-0.0625598	0.124112	0.075144	0.237383	0.0270435	0.268933	-0.0840529	-0.031094	-0.15384	-0.202242	-0.167388	-0.273598	-0.151428	0.13018	0.0383914	0.157495	0.390266	0.278675	0.0304379	0.0670545	0.333875	-0.113979	-0.221146
ECH1_Q13011	0.0670352	-0.0581165	0.03209	0.0370739	0.0465027	0.0573283	0.336676	0.299916	-0.022566	-0.0645905	-0.0193813	-0.0171468	0.0169454	-0.0219753	-0.0342082	-0.110761	0.193075	0.0199792	0.0886066	-0.0235182	-0.0346736	0.00468756	-0.00593415	-5.41581e-05	0.121303	-0.0907261	0.667186	0.721276	-0.188423	-0.201617	5.41561e-05	-0.0420706	0.106057	-0.0415362	0.0854377	0.183074	0.132625	0.189937	-0.0945714	-0.00561617	-0.0890308	-0.13898	0.0055944	-0.0275291	-0.0248963	-0.0671501	0.0408087	0.0642217	0.0523572
PIGA_P37287	0.0823229	-0.0519293	0.0390303	-0.00502185	0.0345523	0.0734256	0.00245075	-0.0319374	-0.0820183	-0.00345984	0.0524887	0.0591644	0.063653	-0.0821969	-0.00245492	-0.00634416	-0.596786	-0.132133	-0.665834	-0.184118	-0.111014	-0.0586605	0.112281	0.0350023	0.216466	-0.0358727	0.17524	0.20536	0.15403	0.236505	-0.0765267	0.408114	0.0264836	-0.0453724	0.0131457	0.0170399	0.00179893	-0.0136328	0.0673506	0.00312764	-0.0348165	0.0112165	-0.0631752	-0.0443117	0.0008755	-0.0468922	-0.000876031	-0.0388155	0.136035
RBM48_Q5RL73-2	-0.0471487	-0.256116	-0.0476305	-0.0896481	0.0933528	-0.0806594	0.155284	0.0806032	0.0278331	-0.0272692	-0.127268	0.236532	0.104123	-0.0021879	0.00218459	0.0144057	0.0409811	-0.0623273	-0.0573635	-0.107645	-0.0610224	0.0714556	-0.0392017	0.0142748	-0.0350627	-0.0144175	0.016368	0.210701	0.241964	0.0611783	-0.0806422	0.237615	-0.0538305	0.0633833	-0.0114158	0.105942	0.0786199	0.0383396	-0.134533	-0.0179749	-0.0776	0.147698	0.126138	-0.245728	0.00146062	0.223798	-0.0204149	-0.0014621
LIMS1_P48059-3	-0.00868237	-0.113519	0.0138471	-0.0177161	-0.00699917	0.00262402	-0.0026288	-0.044781	-0.00780575	0.0399537	0.0122246	0.0589622	0.0322265	0.0035306	0.0497956	-0.0358746	0.0357399	-0.0425611	0.052155	0.0229446	0.0125927	-0.0228609	-0.00222228	0.0182937	-0.0164164	0.0154791	-0.0641773	-0.0595705	0.00319703	-0.0177231	-0.0583118	0.00221886	0.0135535	0.0352213	-0.00882737	0.0458595	-0.00326306	-0.00984622	0.0310816	-0.0173088	-0.00205255	-0.00725755	-0.0244184	-0.0393668	0.0388442	0.0538187	0.00204963	0.0187456	0.0329287
LIMS1_P48059-5																																	-0.139885	-0.365318	0.0888022	-0.324192	0.166322	-0.152996	-0.410484	-0.0262791	0.0631459	-0.163966	0.152099	0.025809	-0.0485442	0.0576144	0.306213	0.243203
LIMS1_P48059	0.0643049	-0.118052	0.104075	-0.0196457	-0.20715	0.0386601	0.321056	-0.307763	-0.222707	-0.292498	0.154271	0.0709693	0.0193817	-0.0467259	-0.0811546	0.0216109
FPGT_O14772	0.0949947	-0.0287486	0.00905579	0.00813842	0.0233257	-0.0400759	0.0322107	-0.0987331	-0.0181776	0.00677966	-0.00681167	0.0088288	0.05042	-0.0648288	-0.045473	-0.0094311	0.0801446	0.00369357	-0.00529299	-0.0375956	0.0216801	0.0414058	0.0989391	0.106571	0.00589646	0.0463853	-0.0763018	-0.170674	-0.0535086	-0.00370306	-0.03333	-0.151461	0.0399254	0.00283957	0.0345023	0.129979	0.0423941	0.0417173	-0.00661581	-0.0473802	0.00300535	-0.0336842	-0.0678689	-0.0458218	-0.00284517	0.0109059	-0.022456	-0.0149722	0.0354324
DNAJC3_Q13217	-0.0256276	-0.125231	0.0276916	-0.0454241	0.017105	-0.028744	0.0158201	-0.0129252	-0.0154263	0.0271665	0.0326581	0.0128104	-0.063444	-0.0241167	0.0267618	0.0509332	-0.0719314	-0.050431	0.0264422	-0.0281213	0.00331269	-0.0161677	-0.0339802	0.0378073	-0.0468031	-0.0270303	0.0656109	0.11714	0.0556388	0.0330895	-0.00332031	0.0607456	-0.0658937	-0.0480972	-0.0541967	-0.0473118	-0.0520189	-0.0226121	-0.0120862	0.0490265	0.00126673	0.0400275	0.109372	0.11829	-0.00126784	0.0012783	0.0328982	0.0418426	-0.0231594
GDF15_Q99988	-0.169381	0.107163	-0.158115	-0.137564	-0.0700284	0.0247728	-0.0853197	0.281771	0.563867	0.088784	0.154579	-0.0860269	0.0975006	-0.0883638	-0.0252056	0.032704																	-0.341295	0.0758815	-0.149319	-0.148712	0.0646953	-0.188759	-0.116193	0.031968	-0.128538	0.078093	-0.0216127	0.226959	0.134858	-0.0502573	0.0867118	0.0212937	0.007979
PTPN23_Q9H3S7	0.0275106	-0.0970618	0.0661032	0.0276713	0.0403478	-0.00710326	0.0308565	0.0247988	-0.0778184	-0.0586168	0.00706846	0.0295055	-0.00909609	-0.0941038	-0.0434237	-0.0329936	0.186669	0.0411809	0.0684515	0.00570993	0.0617234	0.0389776	-0.00570251	0.111009	-0.079954	-0.10648	-0.120574	-0.0918807	-0.0145073	-0.130065	0.00568005	-0.0183106	0.0862072	-0.0101644	-0.0345522	0.00295333	0.0173508	0.078603	0.0188999	0.0992758	-0.057524	-0.0342522	-0.021034	0.0757558	0.0780764	-0.00295939	-0.0587609	-0.063741	0.0992112
KIF2A_O00139-4	-0.105834	-0.131625	-0.029664	-0.011646	0.0304124	-0.0449329	-0.00559897	0.103422	0.0971469	-0.00464551	0.0178629	0.00938107	-0.0147376	0.0390584	0.0046306	0.0830991	-0.098269	-0.0820651	-0.00122636	-0.00759748	-0.095429	0.00925329	-0.00781647	0.0413852	0.00122532	-0.0207985	-0.0171662	0.0306586	0.00894473	0.00347174	0.0637111	0.0220077	-0.033966	-0.0280989	-0.0485975	-0.0694013	-0.109274	-0.0392997	-0.0286283	0.0791561	0.00926825	0.0370949	0.135611	0.0753144	0.0236214	-0.00932818	0.0801713	0.0170044	0.00233509
KIF2C_Q99661	0.0340899	-0.0471127	0.0614279	0.0455489	0.0728263	0.0404839	0.0817537	0.117323	-0.00316189	-0.0266487	-0.0110244	0.00315498	-0.0505243	-0.0144821	-0.0545718	-0.0689432	0.0316602	-0.0495757	0.0674093	-0.051012	0.114821	0.128769	0.108642	0.134476	-0.107223	0.0186051	0.0135611	-0.133213	-0.0334945	-0.0955608	-0.0136897	-0.11162	0.0407577	0.0130648	0.0493299	0.0556925	-0.0601482	0.0187349	-0.0372577	0.0384449	-0.0556652	-0.0225099	0.0143953	0.00907282	-0.0249218	-0.0326728	-0.00913024	-0.0282106	0.0593152
DCTPP1_Q9H773	-0.113576	-0.0233273	0.0458336	0.0721258	0.052073	-0.028669	-0.0462718	-0.0603907	-0.250786	0.0704519	0.00313912	0.0665268	0.0362481	-0.0142581	0.0474853	-0.00314597	-0.108007	-0.146333	-0.183208	0.0836648	-0.243125	0.0573306	-0.037593	0.247213	-0.0952742	0.255059	0.278336	0.124648	-0.0764021	0.0693323	-0.0997958	0.0366382	-0.252987	0.201422	0.078724	0.0682447	0.0446536	0.0140323	0.0819014	0.0831205	-0.541281	-0.0141701	-0.201831	-0.151786	-0.0175061	0.0355189	-0.0473163	-0.017989	-0.161318
NUDT2_P50583	-0.00692039	-0.125708	-0.000477557	0.0236513	0.127306	-0.145187	0.000477399	-0.0632494	0.0293085	-0.0717456	0.0157329	0.0827473	0.0486772	0.0544462	-0.060531	-0.0689749																	-0.0295454	-0.118304	-0.0424271	0.0338659	0.116424	-0.0111716	0.0537874	0.0215178	-0.073991	-0.0814205	0.064084	0.123979	0.0611752	-0.103436	-0.00664576	0.00661529	-0.121694
RPS25_P62851	-0.159848	-0.177032	0.0286878	-0.179144	0.0165324	-0.141474	0.107519	0.409931	0.243374	0.0654493	-0.0536606	-0.128334	-0.0876857	0.107129	-0.0167241	0.108909	-0.435726	-0.125952	-0.084885	-0.0748986	0.00376148	0.0592446	-0.0106005	-0.00377131	-0.0210088	-0.0286085	0.0875937	0.204052	0.275213	0.203094	0.0987124	0.168398	-0.170992	-0.17739	-0.108349	-0.246466	-0.16079	-0.171323	-0.0735631	0.0442085	0.0185407	0.146297	0.221174	0.25607	0.0235005	-0.018782	0.236175	0.120438	-0.157154
POLR1B_Q9H9Y6-3																	-0.214467	-0.128716	-0.198536	0.10302	0.17178	0.0898027	0.00488638	-0.00490299	0.0375829	0.218392	-0.0782723	0.134953	-0.0531847	-0.0680758	0.0720109	-0.0277952	-0.0662523	-0.0316934	-0.147494	-0.112194	-0.149202	-0.104512	-0.0121344	0.173711	0.128087	0.286585	0.301266	0.282418	0.046129	0.0120332	0.255408	-0.0859826	-0.162767
HERC1_Q15751	0.0262563	-0.0863505	0.00404158	0.0127123	0.0375206	0.0115607	0.0121161	-0.0578773	-0.0252696	-0.0243554	-0.00405294	0.0165989	-0.0365455	-0.0290381	-0.0251688	0.0063237	-0.0863126	0.0614449	-0.0229372	0.00132428	0.0162629	-0.0231432	0.0617142	-0.0159893	-0.0013255	0.0498746	0.00831473	-0.00785084	0.0799683	-0.0143919	0.0142041	-0.0343694	-0.000826276	0.0113641	-0.056415	-0.0493496	-0.0214572	0.0446757	-0.0142953	0.0485195	-0.0272383	0.00802719	0.0193706	0.0246829	0.000825803	-0.00113524	-0.0268134	0.00304863	-0.0428467
PAK4_O96013	0.0341571	-0.00632181	0.0235919	0.0300146	0.000789154	0.123468	-0.0465497	-0.0977954	-0.0512686	-0.047654	0.0973209	-0.000789586	0.00207555	-0.0661303	0.00304715	-0.012399	0.134053	0.0324517	0.116535	0.0269063	2.44493e-05	0.0202103	-0.038034	0.0600085	-0.0277167	0.0248982	-0.098881	-0.0674924	-0.0554766	-2.44497e-05	-0.0129122	-0.104137	0.0959108	-0.0089635	-0.0131871	0.0923157	0.0564503	0.0340309	0.050882	0.00863506	-0.0177815	-0.0564061	0.00424215	-0.0382755	0.0118026	-0.0429865	-0.115744	-0.00425466	0.0850382
FOXO3_O43524																	0.257943	0.237659	-0.0397576	-0.140169	0.196989	0.246415	-0.142724	0.147701	0.197245	0.0938106	-0.287908	-0.0890236	-0.00873629	-0.112303	0.00868371	-0.0165772	-0.125807	0.171304	-0.00151506	0.00151347	0.0805866	0.0485369	0.0139903	0.15208	-0.0351369	-0.0740926	0.0556168	-0.0296941	0.00240001	-0.0813388	-0.137124	-0.110523	0.21708
ZNF106_Q9H2Y7	0.0263006	-0.102142	0.122203	-0.0791444	-0.0542367	0.0965249	0.0144144	-0.0415633	0.0413204	0.0800124	-0.0145598	0.130017	0.117623	-0.143995	-0.0776781	-0.119039																																	0.0522512
TGDS_O95455																	0.270609	0.0840196	0.522807	0.0931955	0.0990957	0.0272936	-0.0278199	-0.303345	0.188207	0.0875529	-0.139268	-0.30936	-0.108945	-0.201535	-0.250947	-0.600669	-0.00658517	-0.0426475	0.237181	0.174322	-0.0152334	-0.39573	0.115803	0.0695163	-0.0453268	-0.213135	0.177848	-0.283273	0.246394	-0.0281961	0.00655525	0.0767862	-0.158888
PPP5C_P53041	0.00897128	-0.0814446	0.0116441	0.0140146	0.0194029	0.0205447	-0.0174508	-0.07222	-0.00568756	-0.0274866	0.00622904	0.0163218	-0.00559477	-0.00551126	0.00549029	-0.02723	0.112638	0.0602249	-0.00628854	0.0215603	-0.0903472	-0.0267897	-0.0123377	0.0385404	0.0582976	-0.0366326	0.00104755	0.0346204	-0.056032	-0.00791405	0.01008	-0.00104831	0.032035	0.0219769	0.012492	0.0700978	-0.00941114	0.048426	0.00837409	0.0272063	-0.040437	-0.0426773	-0.0552899	-0.0281816	-0.0171608	0.00682252	-0.0609289	-0.00685494	0.0170847
DIMT1_Q9UNQ2	-0.256199	-0.313517	-0.0645595	-0.189967	-0.00267956	-0.222439	0.0570365	0.328454	0.0736701	0.0534672	0.00464413	-0.0234689	-0.0745574	0.0768292	0.00267459	0.087219	-0.471705	-0.187093	-0.140336	-0.0539216	-0.0333248	0.0418797	-0.0335756	0.0325724	-0.143119	-0.0821806	0.141573	0.20618	0.22567	0.139674	0.0481959	0.200656	-0.250894	-0.194704	-0.165321	-0.217805	-0.210438	-0.196551	-0.130788	0.0906938	0.00121899	0.236866	0.328723	0.296218	0.0114666	-0.00122002	0.310342	0.212101	-0.144869
ACAA2_P42765	-0.0230954	0.148654	-0.016216	0.00321087	-0.0142841	-0.00321803	-0.00597776	-0.0672141	-0.0329018	0.0370264	-0.0316356	0.036977	0.0270537	0.0116027	0.0450188	0.0253259	0.0225136	-0.0242933	0.0726352	-0.000198322	0.000198295	-0.101897	-0.0508765	-0.0743392	-0.00409881	0.0560113	0.073878	0.0194319	0.0223161	0.0807233	-0.0222779	-0.075991	0.0220459	0.00624241	0.0166445	0.0578401	0.0457383	0.00745188	0.0254505	-0.0858395	-0.0203566	0.000205212	-0.094492	-0.025119	-0.0116131	-0.000205241	-0.00615607	-0.00967338	-0.0398994
ACAA2_K7ER88	-0.109852	0.000267448	0.214171	-0.0532287	-0.0337191	0.360751	-0.233107	0.349873	0.394352	-0.0535517	-0.000267498	0.521298	-0.050511	-0.180179	0.178119	0.198115
PRKDC_P78527	0.0205305	-0.0566675	0.0168925	0.033603	0.0171476	0.0360981	0.0180015	-0.0570367	-0.0187752	0.00104144	0.00322327	-0.00104219	-0.0238771	-0.0525071	-0.00247298	-0.0305477	0.0750166	0.0272173	0.0121177	-0.0414144	0.0313347	0.0240631	0.0171601	0.0525189	0.00876538	-0.00881896	-0.0406319	-0.0780418	-0.0601321	-0.0654621	-0.00908568	-0.0653126	0.0685647	0.0511892	0.0164197	0.0564185	0.00350726	0.092427	0.020134	0.0373126	-0.00351581	-0.0608507	-0.0663621	-0.0814765	-0.0234401	-0.0144792	-0.0880029	-0.0516958	0.0479198
AIFM1_O95831	-0.00154279	-0.0583217	-0.0256336	0.0102162	-0.0109341	0.00960093	-0.00871724	-0.0695769	-0.000519455	0.0142493	0.0319511	0.026817	0.0281954	-0.0168314	0.0210202	0.000519268	0.0568759	-0.0159799	0.00962037	0.0200631	0.00834777	-0.0517668	-0.0324003	-0.0433119	0.0172302	-0.0239525	0.06677	0.0763171	-0.0371804	-0.0338779	0.031772	-0.00839635	0.0255889	-0.00616835	0.0339388	0.0174976	0.01538	0.0143861	0.00970388	-0.0662743	-0.0348131	0.00614209	-0.0518301	-0.0603015	-0.0166706	0.0310001	-0.0227154	-0.0113705	-0.00999685
PPP2R5C_Q13362-5	-0.024104	-0.0225641	-0.0170249	0.0530781	0.0205723	0.0223997	0.00147422	-0.0492599	0.0110264	0.0128023	-0.0393388	-0.0319571	0.0570821	0.0247418	-0.00147573	-0.0759653	0.0380396	0.0591857	0.17136	0.050263	-0.0655015	-0.0215594	0.0152803	-0.00564347	-0.0568837	0.0466424	-0.152247	-0.254299	0.00562148	-0.052918	0.0553069	-0.0729776	0.00123913	0.0238558	-0.024808	0.0868286	-0.0533979	0.0559066	0.0520721	0.0090692	-0.0420673	0.0443435	-0.0222552	-0.0782575	-0.0901214	0.0311421	-0.0882849	-0.0012402	0.0280946
PPP2R5C_Q13362-4	0.140717	-0.0934849	0.0537626	0.0595996	0.0628801	0.0404805	0.0391405	-0.102203	-0.0660471	-0.0104216	-0.0592756	0.0513299	-0.0577953	-0.0440619	0.0103468	-0.0702382	0.0589754	0.0271329	0.025555	0.0158561	0.0437293	-0.109508	-0.0646847	0.0273445	0.085017	-0.0160323	-0.0755981	-0.14375	-0.0393513	0.0178089	-0.114568	-0.0842722	0.095782	0.0105333	-0.00787322	0.0819454	0.00783049	-0.013728	-0.0576191	0.0196298	-0.0477173	-0.0135642	0.0119438	0.0467036	0.0709847	-0.047933	-0.0371737	-0.0893713	-0.00871051
PPP2R5C_Q13362-2	0.118738	-0.0590474	0.0668486	0.0422531	0.0901989	-0.0712008	0.0127007	0.0783172	0.0248786	-0.0741105	-0.021951	-7.96816e-05	7.96772e-05	-0.0756236	-0.0956858	-0.0351381
PPP2R5D_Q14738	-0.0573439	-0.0535155	0.057598	0.0280296	0.0465465	-0.00116478	0.0117032	0.0141259	-0.0441584	-0.0138889	0.0593936	0.027475	-0.0483357	-0.0535299	0.00116384	-0.0325254	0.00130042	-0.0410965	-0.0013016	0.0112182	0.103351	0.154312	0.0267883	0.0774248	-0.0701619	0.135667	-0.0304201	-0.0585909	0.0443597	-0.0224038	-0.0426326	-0.0471741	0.107212	0.111735	-0.0735312	-0.0164845	0.0542825	0.151907	0.0779375	0.104094	0.0143633	-0.0656822	-0.102466	0.0323578	-0.044365	-0.0145078	-0.0756271	-0.0725514	-0.000783367
PPP2R5B_Q15173	-0.0342405	0.0114399	0.00247138	0.0158002	0.0862043	0.133228	0.090179	-0.0779326	-0.00247562	-0.0253121	0.105217	0.0389927	-0.01896	-0.146597	-0.0138683	-0.102097	-0.100607	0.135126	-0.0402668	0.0594742	0.185448	0.0391734	0.11693	-0.229933	0.207147	0.0930454	-0.630279	-0.427622	-0.0771637	-0.47612	-0.117595	0.147158																	0.0894254
PPP2R5A_Q15172	-0.0224237	-0.0963259	-0.0391456	0.0438517	0.16666	0.0582038	0.0108947	-0.0262586	-0.0109776	0.0143133	0.0342501	0.0760594	0.0254389	-0.0731216	-0.0255887	-0.0454829	0.185491	-0.00104371	-0.0937335	-0.099024	0.0772876	0.133745	0.0232197	0.0317114	0.0795232	0.0645491	-0.235136	-0.374859	-0.194382	-0.22463	0.00104295	-0.0939447	0.0440213	0.0429453	-0.00602984	0.0693875	0.0332253	0.105974	0.036818	-0.032836	-0.061808	-0.0686149	0.0370332	0.00600474	-0.0717911	-0.0881224	-0.117871	-0.0592864	-0.0350665
PPP2R5E_Q16537	-0.00272147	-0.0125983	0.0152028	0.0384015	0.128552	0.0691772	-0.0495028	0.00271635	-0.0230314	0.00823482	-0.0210892	0.0212566	0.00461499	-0.00570086	-0.043748	-0.0456923	0.150551	-0.0703524	-0.206164	-0.0301386	0.0895943	0.14638	-0.165371	0.049041	0.431221	0.0723763	-1.28778	-0.691701	0.0295219	0.304687	-0.272662	-0.0567708	0.091317	-0.0342015	-0.0463494	-0.0515064	0.0931199	0.107549	0.016593	-0.0338822	-0.0204576	-0.0102804	0.14392	0.0651366	0.0102076	0.0897202	-0.0273344	-0.110115	-0.000688554
ATF6_P18850
FANCA_O15360
[truncated: 7,538 more rows]
[truncated: 207 more columns]

## Sheet: Example plot
	DMSO-00001_Log2FC_Rep1	DMSO-00001_Log2FC_Rep2	AZD1152_Log2FC_Rep1	AZD1152_Log2FC_Rep2	Rosiglitazone_Log2FC_Rep1	Rosiglitazone_Log2FC_Rep2	Bafetinib_Log2FC_Rep1	Bafetinib_Log2FC_Rep2	DMSO-00002_Log2FC_Rep1	DMSO-00002_Log2FC_Rep2	AS-605240_Log2FC_Rep1	AS-605240_Log2FC_Rep2	Ibrutinib_Log2FC_Rep1	Ibrutinib_Log2FC_Rep2	MP7_Log2FC_Rep1	MP7_Log2FC_Rep2	DMSO-00003_Log2FC_Rep1	DMSO-00003_Log2FC_Rep2	Pictilisib_Log2FC_Rep1	Pictilisib_Log2FC_Rep2	Vorinostat_Log2FC_Rep1	Vorinostat_Log2FC_Rep2	GSK2656157_Log2FC_Rep1	GSK2656157_Log2FC_Rep2	DMSO-00004_Log2FC_Rep1	DMSO-00004_Log2FC_Rep2	SGI-1776_Log2FC_Rep1	SGI-1776_Log2FC_Rep2	Gandotinib_Log2FC_Rep1	Gandotinib_Log2FC_Rep2	GSK-1070916_Log2FC_Rep1	GSK-1070916_Log2FC_Rep2	DMSO-00005_Log2FC_Rep1	DMSO-00005_Log2FC_Rep2	GSK2606414_Log2FC_Rep1	GSK2606414_Log2FC_Rep2	CPI-203_Log2FC_Rep1	CPI-203_Log2FC_Rep2	Zotarolimus_Log2FC_Rep1	Zotarolimus_Log2FC_Rep2	DMSO-00006_Log2FC_Rep1	DMSO-00006_Log2FC_Rep2	Y-33075_Log2FC_Rep1	Y-33075_Log2FC_Rep2	GSK-LSD1_Log2FC_Rep1	GSK-LSD1_Log2FC_Rep2	Flavopiridol_Log2FC_Rep1	Flavopiridol_Log2FC_Rep2	DMSO-00007_Log2FC_Rep1
[truncated: 1 more rows]
[truncated: 207 more columns]
