# Supplementary material for: Large-scale characterization of drug mechanism of action using proteome-wide thermal shift assays
Source: bioRxiv preprint, doi:10.1101/2024.01.26.577428, version 4 (2024-08-14)
Supplement: Table 4 [file 577428_file05.xlsx]

## Sheet: Lysate-based data
	DMSO-00001_Log2FC_Rep1	DMSO-00001_Log2FC_Rep2	AZD1152_Log2FC_Rep1	AZD1152_Log2FC_Rep2	Pictilisib_Log2FC_Rep1	Pictilisib_Log2FC_Rep2	HY-15846_Log2FC_Rep1	HY-15846_Log2FC_Rep2	Bafetinib_Log2FC_Rep1	Bafetinib_Log2FC_Rep2	AS-605240_Log2FC_Rep1	AS-605240_Log2FC_Rep2	MP7_Log2FC_Rep1	MP7_Log2FC_Rep2	Ibrutinib_Log2FC_Rep1	Ibrutinib_Log2FC_Rep2	DMSO-00002_Log2FC_Rep1	DMSO-00002_Log2FC_Rep2	GSK2656157_Log2FC_Rep1	GSK2656157_Log2FC_Rep2	GSK-1070916_Log2FC_Rep1	GSK-1070916_Log2FC_Rep2	Y-33075_Log2FC_Rep1	Y-33075_Log2FC_Rep2	SGI-1776_Log2FC_Rep1	SGI-1776_Log2FC_Rep2	Gandotinib_Log2FC_Rep1	Gandotinib_Log2FC_Rep2	GSK-LSD1_Log2FC_Rep1	GSK-LSD1_Log2FC_Rep2	Flavopiridol_Log2FC_Rep1	Flavopiridol_Log2FC_Rep2	DMSO-00003_Log2FC_Rep1	DMSO-00003_Log2FC_Rep2	GSK2606414_Log2FC_Rep1	GSK2606414_Log2FC_Rep2	Duvesilib_Log2FC_Rep1	Duvesilib_Log2FC_Rep2	Saracatinib_Log2FC_Rep1	Saracatinib_Log2FC_Rep2	HY-10181_Log2FC_Rep1	HY-10181_Log2FC_Rep2	GSK2334470_Log2FC_Rep1	GSK2334470_Log2FC_Rep2	JQ-1_Log2FC_Rep1	JQ-1_Log2FC_Rep2	ER-27319_Log2FC_Rep1	ER-27319_Log2FC_Rep2	DMSO-00004_Log2FC_Rep1
KDM1A_O60341	0.051249	0.00211419	0.0307452	-0.00333055	-0.00474654	-0.0538418	0.00374707	-0.0114653	0.0337306	-0.065057	0.0229964	-0.0340837	0.0379394	-0.0247906	0.0168171	-0.00211729	0.0344348	0.0127179	0.046016	0.00342894	0.0152996	-0.144368	-0.0430775	-0.0673459	0.0222274	-0.0532566	-0.0498149	-0.0625449	0.872566	0.760942	-0.00343711	-0.0651924	-0.00712162	-0.011823	0.017291	0.00708664	0.0247228	-0.0739534	0.0126481	-0.0148458	0.0120546	-0.0584395	0.0407403	-0.0148062	0.0301331	-0.0114059	0.0408077	-0.0342766	0.0448773
PHOX2B_Q99453	-0.161616	-0.110216	-0.245388	0.023691	0.00171023	0.0264214	0.0678808	-0.00171226	-0.803907	0.224361	-0.443025	0.0666226	0.114164	-0.088982	-0.164287	0.236521																	-0.0757372	0.556569	0.0126644	0.43546	0.0271985	0.502145	0.308494	0.196022	-1.17856	-0.0319171	-0.0127765	-0.327181	-0.5317	-0.243409	0.348951	-0.282382	-0.091761
ZFP91_Q96JP5	-0.0101025	0.0267943	-0.0194655	0.00204158	0.0999762	-0.009672	0.00169767	0.0254665	-0.100033	-0.0333411	0.00888654	-0.00169967	0.083014	-0.00324846	-0.0137867	0.0586139	-0.114274	-0.0157948	-0.0966979	-0.0614726	0.114341	0.0719268	0.115417	0.10276	-0.0634589	-0.157936	-0.0803491	-0.0386013	0.0306706	0.0345027	0.0363406	0.0156237	-0.0453193	0.00141717	-0.0218087	-0.00578358	0.0418728	0.0270767	-0.028839	0.019098	0.114058	-0.00645898	0.0667516	0.0976076	-0.0641485	0.0283622	-0.0790119	-0.00141857	-0.14611
ZNF692_Q9BU19-5																																	0.108619	0.19849	0.173394	-0.429559	0.347824	-0.114879	-0.147245	0.0700479	0.321695	0.301937	-0.305914	-0.0773914	-0.0736233	0.194787	-0.185329	-0.229045
SLC15A4_Q8N697	0.00638187	0.0755857	-0.0263213	0.0440846	-0.0231765	-0.051446	-0.0780023	0.0667161	0.0060355	-0.00606085	0.0548342	-0.0668609	0.0331115	-0.0551205	-0.0316711	0.11948	-0.0364248	-0.105096	0.0222575	-0.286711	-0.210348	-0.232034	-0.12356	0.0214946	0.553165	0.181023	0.130674	-0.0218197	-0.0317304	0.131315	0.129784	0.2413	-0.0219692	0.0104593	0.00564631	-0.195399	-0.11021	0.170749	-0.188231	0.103879	0.110562	-0.0056685	0.0332395	-0.0638435	-0.046711	0.0669763	-0.160694	0.016896	-0.209729
IRS2_Q9Y4H2	-0.106115	-0.340636	0.15334	-0.191983	0.0451524	0.00166604	0.314455	0.17743	-0.0291677	0.0917607	0.253091	0.0746018	-0.00166796	-0.180135	-0.0877165	-0.0909611	0.130737	0.271356	0.209894	0.403844	-0.45382	-0.942352	-0.668564	-0.486477	0.392212	0.290286	0.251133	0.339875	-0.52783	-0.180085	-0.458112	-0.143776	0.0480274	0.294189	-0.089685	-0.0574188	0.00240007	-0.00240406	0.00830059	0.0167794	0.0134825	-0.0501131	0.341992	0.208062	-0.0816621	-0.175803	-0.015523	-0.142517
CDK12_Q9NYV4	0.0514245	-0.0100757	0.0329061	0.0144829	0.022637	-0.016576	0.00439434	0.0588744	-0.046162	-0.0157659	-0.0313014	-0.0752264	0.00338136	-0.082558	-0.00338931	0.0585242	0.00772525	0.00164383	0.0630767	-0.0016457	-0.0938389	-0.109008	0.00271794	-0.0305632	-0.0195142	0.0183401	-0.159105	-0.222279	-0.0779016	0.0182603	0.0407595	0.0769945	-0.0868666	-0.000292047	-0.0826216	0.0693562	0.00262116	-0.0272683	0.00639519	0.0691362	0.0229369	-0.00479219	0.0727272	0.0860025	-0.0498731	0.000291988	-0.0152899	-0.0620542	-0.128465
CDK2_P24941	-0.0113542	-0.00666188	0.0047958	-0.0243141	0.04974	0.00659159	0.0372558	-0.0294949	0.101465	-0.0175917	0.0436797	-0.049899	0.00845273	0.0027404	-0.00274562	-0.0599573	0.00807626	-0.0269189	0.019862	-0.0225186	-0.0230331	-0.0871628	-0.0228235	-0.0418579	0.145556	0.188648	0.420607	0.385632	-0.00812173	-0.0486266	0.28744	0.32127	-0.00485649	-0.0455831	0.0512793	-0.030802	-0.0318251	-0.0198338	0.0295128	-0.0638558	0.0464906	-0.0108651	0.088975	0.00740351	0.0604363	0.0924601	0.0048402	-0.0364991	-0.124391
YES1_P07947	0.0140612	-0.0188301	0.325266	0.343263	-0.0444476	-0.0818276	-0.0198614	-0.178461	0.163394	0.146884	-0.00611239	-0.0402032	0.0060866	-0.14203	0.973381	1.00206	0.0965603	0.0392008	0.108814	0.0750704	-0.0974506	-0.193946	-0.0576542	-0.143816	0.0977062	-0.112022	0.226382	0.196862	0.0088826	-0.00893763	-0.0382334	-0.0915713	0.0134078	0.0220034	-0.0394097	-0.134289	-0.0864099	-0.0449253	0.388916	0.272814	0.0742852	0.233287	-0.0135335	-0.174173	0.015853	-0.106525	0.129089	-0.0420685	0.0262971
SRC_P12931-2	-0.103881	-0.00263803	0.09336	0.172351	0.318409	-0.473862	-0.42113	-0.402037	-0.299974	-0.00520279	0.0973655	0.106175	0.00263322	-0.106272	0.442276	0.288061	-0.0436795	-0.219368	-0.0195088	-0.0108082	0.114588	0.253076	0.201921	0.0998856	-0.0545003	-0.186552	0.110755	0.0107278	0.0688346	-0.0344707	0.0377412	-0.108448	-0.205063	-0.0192474	0.018994	-0.0645936	-0.0311743	0.032422	0.0346146	0.125552	-0.0346206	0.0896523	0.0340316	-0.0951679	-0.100135	-0.110232	0.0298483	0.110187	-0.357094
CDK9_P50750-2	0.0307916	-0.0846411	0.0243291	-0.0736703	0.0279345	0.0409788	0.0190928	-0.10518	-0.107147	-0.142439	0.0401805	-0.000520876	0.0248065	-0.0271635	-0.0845565	0.000520688	-0.0245269	-0.142172	-0.0362808	-0.0748088	-0.158417	-0.247984	0.0728029	0.0601659	0.0927141	0.0644885	0.124411	0.0241169	-0.103962	-0.124644	0.560209	0.596137	-0.0123048	-0.0318948	0.0344794	-0.0492789	0.00505117	-0.0568064	0.0257677	-0.0163396	0.0109487	-0.00506892	0.0248595	0.0080986	0.0121565	-0.0274552	0.0141231	-0.0555454	-0.118388
LYN_P07948	-0.0357607	0.0080382	0.24442	0.271895	-0.0135419	-0.0578482	-0.0019385	-0.20394	0.836151	0.689419	-0.0285169	-0.11222	0.0019359	-0.128235	1.14229	1.16614	-0.064133	-0.0359359	-0.0450246	0.0355231	-0.024333	-0.000439519	-0.0020229	-0.155018	0.31322	0.15369	0.578724	0.522604	0.0223251	0.000439385	0.0898845	-0.0385823	0.00238672	-0.0531224	0.116588	0.0742899	-0.00908002	-0.0747159	0.637854	0.571192	0.498861	0.414535	-0.0796568	-0.104955	-0.00239067	-0.0623178	0.0329211	-0.118118	-0.118329
LYN_P07948-2																	-0.0282251	-0.190387	0.0231098	-0.0361071	-0.0955036	0.0336687	0.394664	-0.341898	0.46931	-0.421733	0.859084	0.922325	0.226922	-0.023486	-0.0248028	0.301217	-0.114824	0.0377658	0.207771	-0.0863588	-0.342017	-0.372928	0.388733	0.31629	0.453665	0.421508	-0.105013	0.132973	0.125713	-0.0387811	-0.225037	-0.226969	-0.028791
CDK6_Q00534	0.0557557	0.014933	-0.00571893	0.00301607	-0.0423551	0.028983	-0.045544	0.00897419	0.0132651	-0.00302239	-0.0153955	0.0353725	-0.0203427	-0.0268617	-0.0104885	0.0315952	0.0161278	-0.0224654	-0.0401054	-0.0294922	0.00798978	-0.0306876	-0.00540772	0.0134301	-0.0136871	0.00538752	-0.0677	-0.0597808	0.0277217	0.0367331	0.0865927	0.0845716	-0.00018857	-0.00790283	0.011461	0.0174301	-0.00289372	-0.0128127	-0.0205574	-0.00644034	0.0272507	0.0443263	-0.0263963	0.000188545	0.00821869	-0.00894073	0.016241	0.0299249	0.00911214
CDK16_Q00536-2	0.0225363	-0.084964	0.0735941	-0.0590935	0.275378	0.169974	-0.0469575	-0.070419	-0.0214852	0.00758967	0.0318637	-0.0418201	-0.00762981	-0.0319889	0.040681	0.00867066	0.00716175	-0.115164	-0.0697393	-0.0311096	-0.013498	-0.0408595	-0.0403612	0.00887501	0.10576	0.0599499	0.562914	0.502291	-0.00719748	-0.0917931	0.538504	0.546023	-0.0293431	-0.014252	-0.0494548	-0.0161149	0.0720864	0.0142343	-0.0422654	0.10142	0.122783	-0.0576982	0.136676	0.0754703	0.0731988	-0.0959749	0.0141126	-0.0287861	-0.168536
CDK1_P06493	0.0191443	0.00149179	-0.0704458	0.0114832	0.0217874	-0.0636506	-0.000780493	-0.0170464	-0.0493372	0.0168336	0.000780071	-0.00412398	0.0575138	0.0166422	-0.0327453	-0.109879	0.0198607	0.0373968	-0.0449549	0.000411405	-0.0235993	-0.0890871	0.033071	-0.0688758	0.000252388	-0.0991284	-0.193275	-0.254326	0.0355268	-0.000252432	0.0614026	0.0113071	0.0468032	0.019921	-0.00418986	-0.0350758	0.0464685	0.0158091	0.0299011	0.00211915	-0.0162244	-0.0370753	-0.00212227	-0.0400584	0.0567705	-0.0146284	0.04038	-0.0199404	-0.0356805
CDK5_Q00535	0.0167965	-0.0690501	-0.0312544	-0.00512835	0.128528	0.061788	0.0191818	-0.0782097	0.0390298	-0.0554572	0.00511018	-0.0519125	0.0153946	-0.0349443	0.0862354	-0.056385	0.0640042	-0.0437539	-0.0223703	-0.0229812	-0.0327063	-0.0764597	-0.00725436	-0.0401274	0.103909	0.0377168	0.473163	0.42943	0.00721807	-0.0465316	1.09821	1.04773	-0.00298992	-0.00167039	-0.0169135	0.0546512	0.0489181	0.0112222	-0.0293984	0.0138625	0.0416048	0.00166846	-0.0260945	-0.0380027	0.0629776	-0.0580972	0.0132124	-0.0253632	0.0487901
CDK13_Q14004	0.0416842	-0.168268	-0.0310528	-0.0900033	0.0999018	0.115409	0.0364418	-0.098944	0.0947141	0.107513	0.0578176	-0.037554	-0.145287	-0.0374146	-0.106205	0.0303985	0.0578762	-0.077204	-0.0380112	-0.0535144	-0.0824758	-0.0982945	0.047499	0.00170003	0.0817693	-0.00170204	-0.10406	-0.0965313	0.0886172	0.0149507	0.286812	0.286329	-0.153789	-0.195625	0.0129823	-0.00300353	-0.0143899	0.00299729	0.11707	0.030536	-0.035585	0.0445594	-0.264224	-0.104677	0.108625	-0.0104963	0.0240514	0.0572691	-0.0280268
STK3_Q13188-2	0.00107375	-0.00904883	0.0375647	0.0266672	0.0357419	0.00507852	-0.0437381	-0.0408063	0.0457962	-0.0431785	-0.00188749	-0.00107455	-0.0412654	-0.0213954	0.101254	0.119599	-0.0730254	-0.101022	0.0923749	0.152243	-0.0195109	-0.0140964	0.0109173	-0.0691986	0.245453	0.186798	0.473749	0.461503	-0.0678098	-0.0789653	-0.0110005	0.0111539	-0.0954936	-0.0808779	0.271276	0.280852	-0.04976	-0.0669873	-0.0115442	-0.0080431	0.134776	0.128693	0.0225512	0.00799851	-0.0332843	0.0534545	0.0213235	-0.0222498	-0.200294
STK4_Q13043	0.012747	0.0118032	0.0726797	-0.0141241	0.0267508	-0.0758241	-0.00520776	-0.190285	-0.0365356	-0.0688709	-0.0234824	0.00716919	0.00518903	-0.0667816	0.0713563	0.0416209	-0.159478	-0.149546	0.0654413	0.0591643	0.00477007	-0.042113	-0.072932	-0.135601	0.180497	0.156307	0.517742	0.490392	-0.115836	-0.131727	0.0272886	-0.0047859	-0.0546153	-0.00749223	0.270919	0.292084	0.0105377	-0.00310915	0.0287989	0.0287225	0.224849	0.202361	0.00282198	-0.00282751	-0.0360342	-0.0213738	-0.00557996	-0.0247745	-0.163717
CDK4_P11802	-0.0086193	-0.025145	0.0751424	0.0625025	-0.0253221	0.00856811	-0.0358615	0.0245136	-0.0469147	-0.0294027	-0.0232696	0.0237356	0.0888661	-0.0316227	0.0712174	0.0736795	-0.00871849	-0.029044	0.00725192	0.0150669	0.025119	0.522674	0.0126291	-0.242188	-0.00728856	-0.039556	0.0641066	-0.0529796	-0.038069	-0.16633	0.097466	0.1233	-0.0482141	-0.0487395	0.00383529	0.00450377	-0.0039874	-0.00384551	0.0530684	0.0327824	0.0667835	-0.0824667	0.0170914	-0.0193685	0.0329049	0.0572147	-0.0344116	-0.0976845	-0.164739
CDK17_Q00537-2	0.0520311	-0.00527155	0.0311916	-0.0101217	0.00525236	-0.0214782	0.123034	0.0758665	-0.090115	0.0238823	-0.00911501	-0.218951	0.0879435	0.0563373	-0.0454922	-0.0117016	-0.432591	-0.366055	-0.297857	-0.420257	0.0816961	0.101045	0.0911556	0.100579	-0.216609	-0.381889	0.0878478	-0.00450455	0.00449053	-0.297287	0.773454	0.424331	-0.0920485	0.0142007	-0.0435225	0.0654565	-0.0128056	-0.067786	-0.103275	0.0697448	0.0579821	-0.193783	-0.0583721	0.0217251	0.0878652	0.0570323	0.012693	-0.172867	0.0434809
PRKD2_Q9BZL6-3	0.0566582	0.0619519	-0.0137096	0.0807443	-0.000172669	-0.0173421	-0.011095	-0.0508819	0.112013	-0.0720703	0.14559	-0.0888856	0.126811	-0.125668	0.000172649	0.0524598	-0.0479029	-0.0210597	0.0250188	-0.0457507	0.0652639	0.0106025	-0.115782	0.0212286	0.0147807	-0.153801	-0.142062	-0.157173	0.157886	0.0501882	-0.010681	0.0300013	0.058902	-0.0420295	0.0985524	-0.0179189	0.0801859	0.0191423	0.00456134	-0.0045758	0.140951	-0.0852628	-0.0535613	0.100823	0.066401	-0.0256431	-0.0685426	-0.154298	0.436788
STK36_Q9NRP7	-0.166597	-0.000995494	0.0272417	-0.173259	0.00923313	-0.0226894	0.213361	0.134106	-1.05577	0.412663	-0.242178	-0.0953511	0.175706	-0.203181	0.000994808	0.0376169	0.193211	0.320379	0.483054	0.31359	-0.474262	-0.589828	-0.541892	-0.560487	0.440532	0.444269	0.349433	0.218034	-0.42972	-0.411153	-0.437168	-0.223147	0.218968	0.688627	-0.250301	0.023963	0.0261443	0.356681	-0.0620379	0.216985	-0.259286	-0.0243677	0.644461	0.411654	-0.316634	-0.543072	-0.18641	-0.166395	-0.145569
PRKD3_O94806	0.271881	-0.0638979	0.202858	0.118866	0.0883777	-0.0507906	0.01805	-0.0182787	-0.0530414	-0.118905	0.031037	0.0460128	0.12722	-0.0575775	-0.180001	-0.0434677	0.515404	0.507439	0.4858	0.433739	-0.557966	-1.19441	-0.565466	-0.720089	0.247764	0.189941	0.545328	0.301531	-0.517282	-0.254422	-0.396279	-0.218795																	-0.267818
CDKL5_O76039																	0.174517	-0.20058	-0.0175208	-0.128364	-0.0262138	-0.155219	0.109224	-0.364859	0.15845	0.0173106	0.601771	0.471256	-0.208013	-0.0551611	1.23662	1.03491	0.216412	-0.229624	0.125673	0.249884	0.110196	0.0365244	-0.0374732	-0.206079	-0.393161	0.203917	-0.233021	0.12989	0.205617	-0.483187	-0.168518	-0.533822	0.282983
FYN_P06241	0.0874479	0.232727	-0.0930925	0.222881	-0.143375	-0.25804	-0.148371	-0.313499	0.153912	0.241166	-0.253846	0.129385	-0.253283	-0.3934	0.620684	0.959251	-0.165219	-0.237104	-0.0701828	-0.0430679	0.05666	0.0401754	0.057168	-0.241795	0.320557	0.119042	0.446729	0.397957	0.0178798	-0.241015	-0.0181042	-0.138268	-0.133316	0.000720893	-0.0679257	0.076139	0.0516518	-0.0892581	0.0539831	0.0418586	0.0268573	0.0140151	-0.0403994	-0.0981666	-0.0223876	0.061233	-0.0829632	-0.000721253	-0.287808
RPL4_P36578	-0.0795842	0.025614	-0.0727107	-0.0751935	0.00534696	0.0419193	-0.01238	0.0306479	0.0792923	-0.0525765	-0.00411642	-0.0304053	0.0184563	0.0681121	-0.034411	0.00410471	-0.0496425	-0.0505434	-0.0558404	-0.0403442	0.0852613	0.2045	0.0752758	0.165309	-0.0462806	0.0151849	-0.0583232	-0.0319925	0.0125195	0.0462799	-0.0126291	0.0503488	-0.084113	-0.00391507	-0.0192567	-0.00846748	-0.0317519	0.0708285	-0.0251584	0.00953051	0.0352566	0.0619345	0.00390447	0.0145476	-0.0358015	0.0718763	-0.0147378	0.0171409	-0.142061
KHSRP_Q92945	-0.0981964	-0.0198218	0.0044429	-0.0238601	-0.0153887	9.5802e-05	-0.00897236	-0.0126333	0.0165802	0.0256847	0.004291	0.00747304	-0.0234189	0.0439157	-9.58084e-05	0.0342092	-0.0226402	-0.00104038	-0.0440279	-0.02839	0.0153953	0.100112	0.00861861	0.0233402	-0.00818741	0.0165346	0.00103963	0.0291843	-0.0405642	-0.028576	-0.0386897	0.0342069	-0.0673644	-0.0374855	0.0207278	0.00828582	-0.0105389	0.0376297	-0.0201963	0.0265372	-0.019183	0.0610144	-0.0734949	-0.00144935	-0.00600666	0.0572963	0.00144789	0.0699492	-0.115614
FUBP3_Q96I24	0.107241	0.012246	0.090019	0.00630034	-0.0769366	-0.14113	0.0450539	-0.00632798	-0.050656	-0.0586617	0.0154455	-0.0338445	-0.0170156	-0.0862723	0.0180291	0.0302583	-0.00481929	-0.0349681	-0.022083	-0.076991	0.0378549	0.0183743	0.082405	-0.0100599	0.0339703	-0.0582952	0.0340106	0.00480324	0.0720671	-0.0503936	0.0365835	-0.021166	0.0631532	-0.0102296	0.00615424	0.0134935	-0.00341789	-0.0404362	0.0378738	0.0230041	-0.128298	-0.0596435	-0.0401156	-0.0606546	0.00340981	-0.0234957	0.0787853	0.0649121	-0.124369
FUBP1_Q96AE4-2	-0.0250862	0.000152834	-0.0395395	0.00808951	-0.0324949	0.0454511	-0.0190382	0.0580341	-0.0349152	0.102225	-0.0208955	0.035503	-0.000152851	0.0704025	-0.0204491	0.050205	-0.00408621	-0.012123	-0.0192024	0.00407467	0.0423668	0.154691	-0.00620111	0.0725314	0.0112777	0.0828713	0.0277775	0.0583589	-0.0184751	-0.0214172	-0.0638904	-0.0116537	-0.0296743	0.0246278	-0.00107725	0.00835661	-0.0745198	0.0619439	-0.0278128	-0.0134688	-0.0451796	0.0659029	0.00107644	0.0291511	-0.024516	0.00715655	-0.0330942	0.0270003	0.0432312
FUBP1_Q96AE4	-0.139994	-0.00527949	-0.0778072	-0.00771481	-0.00141937	0.00141797	0.176955	0.109669	0.00279403	-0.0105188	0.0513972	-0.0546184	0.0235164	0.114484	-0.00620652	0.182717	-0.0107665	-0.21025	-0.029545	0.116049	0.162101	0.00693513	-0.0780398	-0.278312	0.0690026	-0.028565	0.107459	0.144214	-0.00696863	0.0134223	-0.189868	0.0304521	-0.0845208	-0.106118	-0.00162723	-0.0454254	0.00716254	-0.0237468	0.0628112	0.0440836	0.196682	0.00950606	0.186916	-0.0592532	-0.0496501	0.148574	-0.105309	0.00162539	-0.356399
MAGED4_Q96JG8-4																	-0.00495047	0.25528	0.35467	0.39712	-0.200913	-0.315343	-0.19998	-0.20261	0.430035	0.308583	0.358183	0.267014	-0.271657	-0.0577101	-0.158979	0.00493354
GTPBP1_O00178	0.0250622	0.00242664	0.0169676	-0.0707964	-0.00662447	-0.0234943	0.0380287	0.0573913	-0.033776	-0.014792	0.0114763	-0.0255076	0.0592058	0.013576	-0.00243072	-0.00477401	0.00727689	0.0178233	0.0121842	-0.0108258	-0.0810824	-0.194506	-0.114542	-0.108926	0.039697	0.0255184	0.0512342	-0.00916518	-0.0589534	0.0159423	0.000991687	-0.000992369	0.0139672	-0.0277168	0.0236632	-0.0410935	0.00895583	-0.0183854	0.0248352	0.0216123	-0.0313686	-0.0260766	0.0239177	-0.00825893	0.0142028	0.00821192	-0.0347197	-0.0434481	-0.107598
MAGED2_Q9UNF1	-0.0878307	0.0145991	0.0112667	-0.00746399	0.024564	0.00156996	0.0865498	0.0736678	-0.327602	0.0152729	-0.0128397	-0.0257526	-0.000899534	0.000898974	-0.0688832	-0.0578911	-0.00604408	-0.0322679	0.00154584	-0.00196659	0.0485956	-0.0015475	0.0285143	0.00262293	-0.080012	-0.0986713	-0.11974	-0.0962943	0.016425	0.0803516	0.019639	0.0658173	0.00357074	-0.0300823	0.0180545	0.0817105	0.00984775	-0.0385612	0.0211197	0.108658	-0.0290987	-0.0185022	-0.0428644	-0.0331972	0.00195472	-0.00195738	-0.0748601	0.0266145	-0.132226
MAGED1_Q9Y5V3-2	0.0902931	-0.192523	0.106672	0.0952038	-0.0341491	-0.0421155	0.162477	-0.000739489	-0.117015	0.00073911	-0.23428	-0.0184533	0.0260464	-0.16942	0.0141886	0.208861	-0.135989	0.053647	-0.495338	0.205138	-0.0979041	0.0290585	0.0571471	0.0375842	0.143208	-0.173646	0.158785	0.278133	-0.0296558	-0.10878	-0.0404514	-0.2828
MTMR14_Q8NCE2	0.0734989	0.0105878	0.0443701	0.00911809	-0.0271649	-0.0616632	-0.0120436	0.0479953	-0.180042	-0.0609513	-0.0077456	0.0162236	0.00770424	-0.0694879	-0.0304733	0.0275473	0.113138	0.0889687	0.110181	0.0521396	-0.00711196	-0.0244957	0.00098155	-0.0536617	0.0121096	-0.0079646	0.0750063	-0.000982218	-0.00258841	0.0578925	-0.0230172	-0.00215207	-0.0270322	-0.0069313	-0.00679003	0.0271662	0.0368732	-0.00256763	0.0452873	0.0228146	0.00256307	-0.0432548	0.00862443	-0.0354077	-0.009683	-0.0106254	0.0119634	0.0140991	-0.030132
QSER1_A0A3B3IRW6																																	-0.168111	0.00707841	0.0343372	0.0692935	0.0227965	-0.013117	-0.0493658	-0.0232398	0.0413066	-0.00596367	-0.0246258	-0.0453397	0.00593912	-0.0597615	0.0315463	0.0418279	-0.123183
SAMD1_Q6SPF0																	0.267675	-0.130375	-0.0350724	0.195731	0.115324	-0.0968422	-0.280897	-0.44282	-0.248948	-0.544963	0.0524616	0.303885	0.181824	0.03424	-0.30513	0.175404	0.0935069	0.061632	-0.00746832	0.0223307	0.0825114	0.21583	-0.147352	-0.0401419	0.0507139	0.0111948	-0.130001	-0.0428442	-0.0415936	-0.0627728	0.00742986	-0.037072	-0.0263807
CLPX_O76031	0.0391114	0.0185953	0.100306	-0.0264259	0.0349086	-0.0915633	0.0289964	-0.0461913	0.0569423	-0.0663863	0.105555	-0.0188381	-0.0420745	-0.103431	0.0276104	-0.0464349	0.02935	0.000382799	-0.011493	-0.0159653	0.0832462	-0.031978	0.0458768	-0.0349161	0.0491403	-0.000382901	-0.0495775	-0.0992099	0.0597682	-0.0168918	0.00770693	0.0273971	-0.000192016	-0.0351093	0.0141937	-0.0200257	0.0538535	-0.00256772	0.0430224	0.00019199	0.0586014	-0.092319	0.060863	-0.0127959	0.00147744	0.0686771	-0.0269172	-0.0723634	-0.108953
ABT1_Q9ULW3	-0.0665112	0.0547907	-0.0602495	-0.0235129	-0.0387702	-0.0970284	0.0638502	-0.00307838	0.0335353	0.0665955	0.0265287	-0.0894586	0.130524	0.0751171	0.00307183	-0.0354188	0.0650628	-0.000265459	0.0683653	0.0691367	-0.05369	0.0493729	-0.0449918	0.0103863	-0.014589	-0.0189184	0.00026541	-0.0319542	-0.00875106	0.0536453	-0.0359962	0.0165827	0.0377657	0.0759036	0.0354784	-0.0468644	-0.0263161	0.0823838	0.150496	-0.108771	-0.0625681	0.097868	0.043009	-0.0165281	0.0163409	-0.121581	-0.036694	-0.0591538	-0.214292
CACTIN_Q8WUQ7-2	-0.154111	0.0100105	-0.146245	0.035373	-0.0657954	0.00925209	-0.0548259	0.100901	-0.115579	-0.228648	-0.111339	0.00417124	-0.00418334	0.0333098	0.0808999	0.0188186	-0.0810554	0.0995804	-0.0686434	0.0173551	0.127381	0.105293	-0.0109483	-0.00985631	0.00978943	-0.105033	-0.0771884	-0.0878201	0.048653	0.0838747	0.0198121	-0.0148023	-0.12623	-0.0853267	-0.024126	0.0154417	-0.0299098	-0.0985899	0.0415885	0.00780863	-0.00346755	-0.0221688	0.0281107	-0.0753257	0.0270426	0.0211447	0.00345923	0.0192728	-0.168935
NCL_P19338	0.0351026	0.0161182	-0.0236574	-0.00852934	-0.0034182	0.0258528	-0.00804345	0.0118763	0.0472896	0.016918	0.00341012	-0.0244166	-0.0599559	0.0562034	-0.0139154	-0.0165926	0.0302429	0.00308839	-0.00698736	-0.0120832	-0.00500972	0.0155912	0.0023247	0.0500196	-0.0731157	-0.00232845	-0.0548961	0.00730101	-0.01086	0.00289692	-0.00588911	0.0638388	0.0132752	0.0215699	0.0411977	-0.0154975	-0.0173281	0.0864849	0.000726798	-0.0035468	-0.0379452	0.0438798	-0.00772852	0.0231245	-0.000727165	0.00131352	-0.0375489	-0.0156003	-0.0760416
NCL_H7BY16	-0.281655	-0.157383	-0.24185	0.188725	0.115659	-0.34996	-0.135198	-0.0240472	0.0962126	0.0177582	0.119728	-0.0179795	0.190461	0.304027	0.0306931	-0.284183
MRPS15_P82914	0.20974	-0.0129556	0.117604	0.0909511	-0.0332635	-0.0353184	0.0623619	0.109092	-0.480485	0.0128403	-0.044164	0.0512505	0.0362073	-0.087915	-0.0283225	-0.0767532	0.120372	0.124138	0.268027	0.111198	-0.00615864	-0.078217	-0.00133259	-0.108017	0.0727908	-0.058409	0.0866624	0.0664546	-0.0564098	0.00133136	-0.0274231	-0.0587958	0.109722	0.104415	-0.0230176	-0.0306543	0.0871032	0.0148221	-0.0149759	0.0639569	0.0672121	-0.0984168	0.265222	0.196451	-0.0561004	-0.062505	-0.0988342	-0.205692	0.112231
UNC119B_A6NIH7	0.0322278	-0.102215	-0.0140247	0.089072	0.033349	-0.065023	-0.0678221	0.000193076	0.0563971	0.097515	-0.0261194	0.0400129	-0.000193102	-0.088661	0.037086	-0.105174	-0.00228882	0.0906202	-0.00136036	0.0460002	-0.0224542	-0.178503	-0.0809298	-0.139393	0.0431909	0.064353	0.125133	0.0246743	0.0387855	-0.154203	0.00135908	-0.0335711	0.0365056	0.203849	-0.0387093	0.0233666	0.0833049	0.0155366	-0.0960755	-0.000372351	-0.132499	0.000372255	0.0683856	0.0908395	-0.107378	-0.288938	-0.0675568	-0.103927	-0.455141
UNC119_Q13432																																	0.239901	0.0167621	-0.010895	-0.05426	0.121884	-0.0630116	-0.140955	-0.0395461	-0.0660262	-0.275065	0.098952	0.156045	0.132813	0.0108134	0.0330283	-0.0266657
RBM42_Q9BTD8	0.0362519	-0.0436868	-0.00646543	-0.0666706	0.0471016	0.0508093	-0.0261984	0.0211544	0.221299	-0.0546355	0.00610328	-0.0425251	-0.0245257	-0.00287616	0.00287044	0.139866	-0.00334209	0.0125681	0.0285007	-0.049081	-0.0262978	0.0338787	0.0599747	-0.0077877	0.0455347	-0.050272	-0.0239796	0.104434	-0.0422809	0.0300611	-0.075386	0.00333437	-0.0497089	-0.0333605	-0.0359799	-0.0426065	-0.0116775	-0.0531948	0.066505	0.0115837	-0.112319	0.0703138	0.0844324	0.0696096	0.110829	0.0944372	0.0947681	-0.0141262	-0.104147
RCC2_Q9P258	0.0295149	0.0127935	0.0125374	-0.0495839	0.0458905	-0.0045521	0.0407345	-0.0588998	0.0026576	0.00114846	-0.00793735	-0.0434105	0.00866925	-0.00114938	-0.00444796	-0.0760837	0.0280178	-0.0188865	0.0126105	-0.0567145	0.0109263	-0.00893521	-0.00250534	-0.00735752	-0.0247256	0.00256779	0.002501	-0.0421747	0.0448711	-0.0142377	0.0308343	0.00885957	-0.0128777	0.0291238	-0.00532762	-0.0280457	0.00804076	0.0288909	0.0414453	-0.0270086	0.0023582	-0.0138929	0.0388672	-0.0212259	0.0254043	-0.00236207	0.0155121	-0.00277346	0.333101
UNC45A_Q9H3U1	0.0189248	0.021289	0.0198859	0.0169095	-0.0128701	-0.0400582	-0.00378075	-0.018306	0.0373543	-0.0739852	0.0208873	-0.019433	0.00377087	-0.0758434	0.0176968	-0.012805	-0.00257938	-0.0247099	0.0266335	0.0150042	0.0331009	0.00646389	0.0529307	-0.0151642	-0.0233002	-0.137861	-0.0931726	-0.128403	0.0472272	0.0298607	0.00257478	-0.0362238	0.04306	0.024595	0.0370659	-0.00497618	0.0191486	-0.0248856	0.0296779	0.00495908	-0.0330227	-0.068651	-0.0159511	-0.0061622	0.0409393	-0.0324549	0.0121158	-0.00824066	0.0303028
TAL1_P17542	0.00411612	0.000136239	0.0588978	-0.0128573	0.0393978	-0.0313325	0.082578	0.0111245	-0.0951954	-0.00157345	-0.0470071	0.0216726	-0.000136252	-0.0408365	-0.0620099	0.0711294	0.00457428	-0.0200888	0.0568701	0.0457161	-0.0399293	0.0256231	-0.0208711	-0.0433044	0.0747409	-0.00458883	0.135889	0.129924	-0.021771	-0.0301435	-0.0483986	0.0222298	-0.109502	-0.0656691	0.0317082	0.00932225	-0.0321303	-0.00684696	0.0149554	0.0423743	-0.0375217	0.106519	-0.0534462	0.00681462	-0.051571	0.0347164	-0.0453404	0.0160063	-0.194434
LYL1_P12980	0.137769	0.0429057	0.147308	-0.211506	-0.195061	-0.121916	0.179485	0.112141	-0.30056	0.0552592	-0.136714	0.122648	-0.185639	-0.179171	-0.044221	0.117288	-0.2011	0.194311	0.0458123	0.211924	-0.153351	0.308765	-0.023543	-0.386824	-0.0203502	0.0773334	0.144537	0.0125923	-0.210073	-0.0451613	-0.0127032	0.112344
VKORC1L1_A0A3B3ISV4	-0.0641453	0.183544	0.129161	0.142312	-0.169655	-0.000284276	-0.106878	0.00028422	0.000773963	-0.0296259	0.0494924	0.0361714	-0.0715185	-0.0598969	-0.165652	0.0427261	0.0583726	0.048838	-0.0175611	0.0646352	-0.0795155	-0.152241	-0.129012	-0.0628871	0.026021	0.0173499	-0.0492599	0.0379058	-0.107033	0.0350328	-0.0972126	0.032457	0.00397053	-0.0131875	-0.055326	0.0675965	-0.0654977	0.0958097	-0.00398149	-0.0280121	-0.0292119	0.0601702	0.0426981	0.150389	0.00621578	-0.042943	0.0215554	-0.0320162	-0.115267
RANBP6_O60518	-0.0789705	-0.00915662	0.00774642	0.0189296	-0.0237315	0.0132768	-0.101901	0.00694676	0.124853	-0.0926011	0.0292145	0.0921693	0.0796677	-0.0543878	-0.0606105	-0.00698037	0.110762	0.147007	0.0827733	0.213121	-0.0072322	-0.0820489	-0.0275672	-0.105615	0.0944804	0.0254196	-0.0182068	-0.0023242	0.00232046	0.00687895	-0.0152254	-0.0501214	-0.0860823	0.0402669	0.0678371	0.0295925	-0.0163007	0.0542569	-0.0291536	-0.0478097	-0.00547726	0.00201951	0.0295201	-0.00202234	-0.00429999	0.151778	-0.0434901	0.00957618	-0.0415396
IPO5_O00410-3	-0.0243137	0.0144218	-0.0025101	-0.0701037	-0.00311197	-0.00536659	-0.0183626	0.00250574	0.0318785	0.00768117	0.0250215	-0.00811489	0.0175362	-0.00427707	0.0183485	0.0282151	-0.0177298	-0.021817	-0.0545859	-0.0358554	0.0453935	-0.00492257	0.00490583	0.0112079	-0.0113888	0.0265092	-0.024665	-0.0280745	0.0475546	0.0155457	0.0206404	0.00702261	-0.0582786	-0.015979	-0.0174959	0.0200732	0.0371963	-0.00252283	-0.0367676	0.000124755	-0.000124766	-0.0259394	0.0177656	0.00299346	0.0249432	-0.0102226	0.0160393	0.00040195	0.00870806
IPO5_H0Y3V4																	-0.0401159	-0.0196069	-0.355446	-0.30787	-0.128196	0.133952	0.0456301	-0.0226463	0.0727181	0.0649569	0.100692	0.0678898	0.00574175	0.179976	-0.00576469	-0.0211433	-0.185254	0.198871	-0.0934182	0.106157	-0.111914	0.0190782	0.0991673	0.023803	-0.0193339	-0.20951	0.0763561	-0.188716	-0.104511	0.0592675	-0.157721	0.0782938	-0.326204
TNIP2_Q8NFZ5	-0.0137419	-0.0353926	-0.0440872	0.193003	0.113853	-0.181354	0.00473152	-0.0954449	0.0741261	-0.0222154	0.157157	-0.00474709	0.0212841	-0.212125	0.12498	0.102624	-0.101679	0.0363056	0.0263637	0.0123582	-0.223565	-0.158099	0.151783	-0.104004	-0.0028803	0.00287456	0.116786	0.143475	0.0864969	-0.0090405	-0.0710934	-0.132461																	-0.0587349
EP400_Q96L91-5	0.0131022	0.00813801	0.0491251	-0.0784665	-0.128519	-0.00818417	0.0295093	0.0188791	-0.0768799	-0.0292864	0.0392284	-0.123747	0.0625173	-0.0784519	-0.183533	0.0620079	0.0225355	-0.101732	0.0300078	-0.0526397	-0.00866125	-0.00440553	-0.00581963	-0.029646	-0.00739248	0.0285457	0.085805	-0.109473	0.00439212	0.0275251	0.00627087	0.0227531	-0.0522016	-0.00603811	-0.00824322	-0.00251646	0.00103113	-0.0724922	0.0140385	0.00557264	0.0355097	-0.0330167	0.0719987	-0.00103186	0.067921	0.0522628	0.0414193	-0.0703753	-0.267974
EP400P1_Q6ZTU2-6	0.0263544	0.106101	0.0553796	-0.0424358	0.0845892	-0.0882533	-0.0268448	-0.11722	-0.0421524	0.273698	-0.116836	-0.0768057	0.170762	-0.04008	0.155663	0.0525482	0.0952371	0.134846	0.0413861	0.0280031	-0.048786	-0.0152752	-0.130458	-0.171539	0.121203	0.0927845	0.00585158	-0.00587541	-0.161893	-0.0937201	-0.0234621	0.182109	-0.0887979	-0.0805018	-0.0668221	0.171264	-0.0800667	-0.0103848	0.0707279	0.0938033	-0.0165542	0.0196323	0.0383605	0.101262	-0.0152121	0.0582198	-0.0903925	0.0103106	-0.654657
MSH6_P52701	0.0711266	-0.0200219	0.0359307	0.00563215	2.30614e-05	-0.0102503	0.0369493	-0.0165583	-0.0341115	-0.0688531	0.0658881	0.0159668	-2.30617e-05	-0.0410634	0.0207007	-0.0186313	0.0174986	0.0159303	0.0605287	-0.0166609	0.00468311	-0.074403	0.0395477	-0.0447506	0.0369066	-0.118101	-0.0608783	-0.113914	0.0320993	-0.00469836	0.0121414	-0.0535098	0.0657173	-0.000741619	0.0517149	0.00806854	0.0610163	-0.0336593	0.0325289	-0.037659	-0.0444973	-0.100608	0.000741238	-0.065426	0.074408	-0.0628029	0.032114	-0.0517195	-0.0280368
MSH3_P20585	0.0208393	-0.0419706	0.0319685	-0.0348525	0.0351368	-0.0458299	0.0633379	-0.0352167	0.0215876	-0.0277271	0.0463311	-0.097112	0.0672005	-0.0305226	0.0210782	-0.0211447	0.106539	-0.0109004	0.0742078	-0.0173987	0.000323091	-0.0502265	0.058387	-0.0937005	0.105242	-0.0439835	0.0429174	-0.0813892	0.0848756	-0.00553144	0.0431212	-0.000323163	0.00479047	-0.0330767	0.0640059	-0.0356437	0.0536803	-0.0548582	0.0407358	0.0348744	0.0226184	-0.0831632	0.104151	0.00909728	-0.00984968	-0.00576779	-0.00480643	-0.0447999	-0.0451463
NAPRT_Q6XQN6	-0.0785203	-0.0109702	-0.0115224	-0.0423868	0.024235	0.0763206	-0.016343	0.0339575	-0.0103064	0.0778065	-0.00184612	0.0132283	0.00184376	-0.0435968	0.048528	0.0969473	-0.0648337	-0.0496237	-0.100341	-0.047725	0.0658492	0.0887506	0.0113853	0.0478818	-0.0636493	0.000381423	-0.0753964	-0.0437755	0.0259255	0.0204174	-0.000381523	0.029425	-0.0698081	-0.044282	-0.0179023	0.0331568	0.0287487	0.00997046	-0.0531827	0.00835545	-0.00840412	0.0269413	-0.124843	-0.0151264	0.0193856	0.0564033	-0.02793	0.0376033	0.0785697
PSMD4_P55036	-0.0330435	0.0195736	-0.00051812	-0.0754102	-0.0170849	0.00716418	-0.0206922	0.000517934	0.0346889	0.00979763	0.00914889	-0.0309863	-0.0482093	0.0425562	0.00402668	-0.0529291	-0.0396776	0.000756651	-0.0472159	-0.00537486	0.0800299	0.0117066	-0.00959862	0.0855553	0.00612485	0.0461196	-0.0136088	0.0205896	-0.00272539	-0.0580523	-0.000757048	0.01028	-0.0814109	0.0225593	-0.00103527	-0.0263399	-0.022313	0.0381695	0.00103453	0.0137685	-0.013419	-0.0234594	0.0437073	0.0284355	-0.0392282	0.0212298	-0.030734	0.0222299	-0.0829572
PSMD4_Q5VWC4	-0.0135212	0.0155298	-0.0584804	0.0555493	0.0690274	0.051596	0.0884452	-0.0627569	-0.0153875	-0.0639907	-0.0422772	-0.00482052	-0.060022	0.0703224	0.00480447	0.0853626	0.08508	0.220064	0.182013	0.0386084	-0.150482	-0.225118	-0.0218339	-0.0240428	-0.00419923	-0.0951668	0.0708769	0.114826	-0.116577	-0.128067	0.00418704	0.031635
PIP5K1A_Q99755	0.0198593	-0.016118	0.218977	-0.00315454	0.101311	0.0381803	-0.0217368	0.156307	-0.0727329	-0.0519242	0.0977338	-0.0544479	-0.0383634	-0.0776163	0.0218162	0.00314765	0.00809739	-0.102771	0.00987675	-0.0770104	0.0511306	0.00224265	0.0575861	0.00256307	-0.535936	-0.491421	-0.00840826	-0.0168774	-0.238435	0.045677	0.156715	-0.00224614	-0.239098	0.148271	0.0377303	0.0290523	-0.098366	0.0128768	0.0793351	0.135589	-0.198961	-0.0740801	0.118773	-0.265999	0.13013	-0.0129928	-0.157303	-0.0963647
STRN4_Q9NRL3-3	-0.00365132	-0.00902446	0.0530796	0.126594	0.0524765	-0.0342335	0.0036421	-0.029598	-0.0158529	-0.0407869	0.0213759	-0.0338136	0.0703364	0.0682276	-0.0359308	0.0853883	-0.0238157	0.0368316	0.0930827	0.0437888	-0.00836483	-0.0692383	-0.0210601	-0.0455302	0.0567841	0.0687291	0.0400463	0.0337546	-0.00288271	-0.00790583	-0.0472888	0.00287696	0.0719706	-0.00404159	0.0475823	0.0538967	-0.0229021	-0.00529209	0.0040303	-0.0074493	-0.0125491	0.00989136	-0.0348101	-0.0277003	0.0258796	0.0459269	-0.0331805	0.0181788	0.00120657
STRN_O43815	-0.00086679	-0.0055356	-0.0169398	-0.0188699	0.000866269	0.00621636	-0.00710452	0.0309169	0.0686649	-0.0370698	0.0520356	-0.0371338	0.0255238	-0.0083753	0.0229926	0.0587401	0.0241963	-0.0084671	0.0212392	0.028514	0.0249414	-0.0166324	0.0253865	-0.049565	0.0084177	-0.0422535	-0.0258577	-0.0553256	0.0221384	0.0212939	-0.0261306	-0.0332399	-0.0114488	0.00321298	0.00381922	0.0563598	-0.00322015	-0.0166359	-0.0102289	-0.0190971	-0.0119287	0.0474636	-0.0177373	0.00568477	0.0224353	0.0125343	0.0117598	-0.0105361	-0.128642
STRN3_Q13033	-0.0240462	-0.000101755	-0.0100133	0.0225801	-0.0460984	0.0263339	-0.053908	-0.038996	0.147992	0.0282967	0.0154045	-0.00945917	-0.0369091	0.0147821	0.000101748	0.059768	-0.0566147	-0.100061	-0.125809	-0.108787	0.110093	0.198898	0.119647	0.146805	-0.119296	-0.105445	-0.0664683	-0.103371	0.113626	0.105303	0.0544767	0.0706682	-0.0401333	-0.0561747	0.0220848	-0.003196	0.0121531	0.00318893	-0.00395871	-0.0448586	0.00335737	0.00450357	-0.0598364	-0.0394059	0.0113067	0.0268345	-0.0572811	0.00930679	-0.0405995
STRN3_Q13033-2	0.0211686	-0.0274612	-0.139419	-0.0214839	-0.0521902	0.155989	-0.259344	0.0482317	-0.321888	0.149844	-0.106185	0.136911	0.194406	0.0535942	0.0635224	-0.0780955	-0.0691415	0.120361	0.00713684	-0.167646	-0.0590872	-0.0247367	-0.0939222	-0.00717232	0.138895	-0.00844995	0.142978	-0.0809277	0.0449755	0.178698	0.0846065	0.0660828	0.00572428	0.00575195	-0.105465	-0.0814444	-0.191702	0.285612	0.00222265	-0.134588	0.0790603	0.23073	-0.00222608	0.0323088	-0.0948884	-0.188881	0.0631724	-0.00674437
STRN3_H0YJT2																	0.119003	-0.140317	0.491152	0.155369	0.058121	0.543625	-0.0457901	-0.127989	-0.0698011	-0.300664	0.000807405	0.221688	-0.0928186	-0.0446586	0.0491276	-0.000807858	0.0016049	0.182424	0.29295	-0.0323721	0.128866	0.191398	-0.0256059	-0.00160668	-0.0766184	0.00301658	-0.0233415	0.0232728	-0.103077	0.0674768	-0.0264596	-0.299469	0.106344
PHLPP1_O60346	-0.178077	0.0165911	-0.00629578	0.0220497	-0.152741	-0.294725	0.00626842	0.00886058	0.0764431	0.0592547	0.0372341	-0.166828	-0.519897	0.328404	-0.041648	-0.424226	-0.0891536	0.043042	0.0379613	-0.04425	-0.0307792	-0.121186	0.114323	-0.0728196	0.0185727	-0.0830406	-0.00419758	0.0364707	0.0714855	0.0041854	0.0865125	-0.0304237	-0.0410236	0.132466	-0.317866	0.0595053	0.0874502	0.259702	0.1025	0.212412	0.11997	-0.206436	0.017666	-0.194339	-0.0967243	-0.39198	-0.017885	-0.0714427
SELENOS_Q9BQE4	-0.0979877	0.0583543	-0.116376	0.122973	-0.0478724	0.0714775	-0.00765382	0.0525668	-0.0123425	0.0760832	-0.0784815	-0.0165202	0.0539975	-0.0157824	0.00761343	0.133868	-0.159497	-0.00960116	-0.123221	0.00538625	-0.0668024	-0.0512407	-0.0237511	0.0196884	-0.00540643	0.0152974	0.0109318	0.0285726	-0.0150403	0.0159053	0.0106805	0.0318072	-0.107935	0.0467738	-0.130915	0.0717491	-0.0554514	0.00799803	-0.0952706	0.00183903	-0.000268172	0.000268122	0.0336567	-0.0214318	0.0123268	0.071219	-0.0132737	-0.0704739	-0.236737
POLR1A_O95602	0.235467	0.179134	-0.0368377	0.184989	-0.0409292	-0.114564	0.0359205	-0.0571948	-0.179932	0.125793	-0.0413187	-0.126838	0.0501187	0.0728066	0.214253	-0.0629519	0.0158974	0.02982	0.0456606	0.0268734	-0.00965223	0.0328286	-0.00274638	-0.0328921	-0.0337524	-0.0774989	-0.00121622	-0.0415972	0.0340766	0.0012152	0.00224737	-0.0211629	0.0464704	0.0874755	0.0614805	0.0584285	0.0429694	0.00155624	-0.0212501	-0.00155792	-0.0172727	-0.0502565	0.212662	0.0803964	-0.0780724	-0.0862834	-0.0583296	-0.103164	-0.127485
POLR3A_O14802	-0.00273954	-0.0108308	0.0121141	0.022074	0.0185037	-0.0384396	0.0416002	0.0150633	-0.0347398	-0.0140355	-0.0045488	0.00273434	0.0380332	-0.0200979	0.0301657	-0.0280905	0.0244674	0.0277209	0.0476385	0.0890014	-0.0864216	-0.129795	-0.0558699	-0.105968	0.0949116	0.0686205	-0.00265662	0.0125517	-0.0803297	0.00265173	-0.0539498	-0.0444824	-0.0198742	-0.0131304	0.0208283	0.00556314	0.0448176	-0.0149226	0.0212746	0.0072271	0.00160265	0.0016325	-0.00198884	-0.0210097	0.0130667	-0.00160443	-0.00764016	-0.0463519	-0.105401
MICAL1_Q8TDZ2-4	-0.0834683	-0.00551085	0.011869	0.0246318	0.00371863	-0.0766649	0.00805547	-0.0220806	-0.00372824	-0.034003	0.00959906	-0.150133	0.0741971	-0.1641	0.0227794	0.0289922	-0.0203219	-0.0592292	0.0140646	0.0218978	-0.00321933	0.0542819	0.0679583	-0.0187103	0.00321216	-0.0630693	-0.0134062	-0.056702	-0.0595202	0.020431	0.0141057	0.00897082	0.0437234	-0.0918759	0.010329	0.0813809	0.060924	0.00206389	0.0707768	0.0588585	-0.0548682	-0.0268089	-0.0825627	-0.0304928	-0.00206685	-0.0681711	0.0965015	-0.0399611	-0.147734
MICAL3_Q7RTP6	0.024423	0.0269413	0.0649107	0.0556109	-0.0186391	-0.0104652	0.000613105	-0.0136384	-0.000613366	-0.059375	-0.015124	-0.0318216	0.0816646	-0.0148421	0.0412409	0.0361462	0.0197903	-0.00576693	0.0426304	0.0116035	-0.025098	0.0204815	-0.0359744	-0.0792542	0.048592	0.00574397	0.0588846	0.00755227	-0.0757707	-0.00605629	-0.0569783	-0.024296	0.00280524	-0.056687	-0.0437278	0.0515036	0.0143989	-0.0153617	-0.0220552	0.0177571	0.023398	-0.0300434	0.023965	-0.00281071	0.0085461	-0.0574185	0.0151747	-0.10127	-0.2025
MICAL2_O94851	-0.427614	0.258417	-0.0165669	-0.0730805	0.0163788	-0.248724	0.184356	0.0439594	-0.173963	-1.32647	0.125455	-0.536445	0.510045	-0.257998	0.0496411	0.0498711	-0.0405711	-0.00386546	-0.0547485	0.306177	-0.000131764	-0.188054	0.0301875	-0.0206247	0.0936677	0.000131752	-0.00588563	0.0502819	0.0406799	0.0220356	-0.17001	0.0790191	0.217905	-0.0839164	-0.228462	0.0614839	0.367592	-0.289256	-0.0643325	-0.347198	-0.194313	-0.0454615	0.0315891	-0.0322963	0.363844	0.324205	0.132924	0.338202
C16orf58_Q96GQ5	0.0514783	0.0226676	0.115255	0.0134002	-0.0110892	-0.0592185	0.00680492	-0.0206893	-0.117957	-0.0279947	0.00274084	0.0381098	-0.00274605	-0.118494	-0.0170575	0.0335951	0.0502228	0.0692638	0.11219	0.131351	0.0527662	-0.0041077	0.103506	-0.0347042	-0.0163622	-0.128948	-0.13071	-0.0967569	-0.0133063	0.00409604	-0.0186437	0.0186457	0.0976598	0.00812755	0.0230969	-0.106407	0.0632441	0.0706032	0.0475551	-0.0206271	-0.0304022	-0.119204	-0.0081736	0.0590341	-0.0667815	-0.139196	0.023188	-0.0540715	-0.000973434
ZFPL1_O95159	0.00232172	0.00878513	-0.229049	-0.102779	-0.168812	-0.0224731	0.101481	-0.00553408	0.115224	-0.109479	0.0376605	-0.208889	0.0535301	0.0242201	0.208405	-0.00232546	-0.00466287	-0.025899	0.00464784	-0.00663994	0.154942	0.0774793	0.121829	0.107605	0.0548287	-0.122668	-0.054333	-0.06604	0.0653601	-0.112874	0.0520708	-0.0144271	0.0352562	0.136917	-0.0930964	-0.0766713	-0.0178976	0.0633061	-0.0513413	-0.0533012	0.0700022	-0.13376	-0.0353487	-0.0585269	0.119513	0.152775	0.037447	0.0176783	0.125196
EDC4_Q6P2E9	0.053491	0.00891401	0.0395987	0.0116839	-0.0299368	-0.0290048	-0.00214092	0.0120093	-0.0719376	-0.0149191	0.00943377	0.00213775	-0.00422174	-0.047856	0.00761607	-0.00974991	0.0365465	0.0249018	0.0603191	0.0381918	-0.0215128	-0.0886003	-0.0106279	-0.0777586	0.00333076	-0.00161257	-0.00495362	-0.0485131	0.0114722	0.010368	-0.0258412	0.00161077	-0.024262	0.0298934	-0.0217538	0.0181856	0.0168938	0.0146404	0.00521672	0.0175194	-0.0899244	-0.0269219	-0.0745842	0.00618562	0.0253741	-0.0101022	-0.00523565	-0.00676765	-0.0894971
PFDN4_Q9NQP4	-0.230341	-0.20455	-0.0779437	0.0516527	0.0156159	-0.0880411	0.0174231	-0.0948826	-0.0907406	0.15429	-0.056862	0.0123476	-0.0124542	0.0784347	0.05718	0.125378	-0.0458869	-0.0338014	-0.159083	0.0603462	-0.014217	0.140756	0.0136268	0.076762	0.0122046	0.0442287	-0.0123087	0.0499261	-0.0310162	-0.0439651	-0.0570774	0.0457662	-0.185052	-0.0135243	-0.169165	-0.203329	0.00277884	0.031076	-0.302836	-0.137863	0.103316	0.00702737	0.0162645	-0.00278421	-0.101901	0.274739	0.110119	0.060946	-0.143775
TDP2_O95551-2	-0.0303841	-0.00290983	-0.024898	-0.045019	0.0197621	0.0346255	0.0151588	0.0684592	-0.00262066	-0.0376036	-0.0265268	0.0340122	0.00261591	0.0407505	-0.0231396	0.00318045	-0.0162733	0.0263982	-0.0260107	0.0373718	-0.0124745	-0.0168011	-0.0182151	0.0391324	-0.00911073	0.0406237	-0.0342056	0.00905356	0.0321224	0.0241339	-0.0259073	0.0280816	-0.0113779	-0.0124651	0.0425036	0.0653589	-0.0100358	0.0361316	0.0189066	0.0307782	-0.0362688	0.00996646	-0.0548918	-0.0357953	0.0271914	-0.0121508	0.0492649	-0.0387688	-0.234232
IPO9_Q96P70	-0.0077942	0.038637	0.0172226	-0.0103536	-0.0243267	0.0092368	-0.00498223	0.00597904	-0.0960504	0.0365121	-0.0020047	0.0290534	0.0126199	-0.0259942	-0.0199464	0.00200191	0.0234772	0.0702281	0.0116003	0.0302348	-0.0441304	-0.167186	-0.121398	-0.0912813	0.0317167	0.0845556	0.0458061	0.0211774	-0.0614916	-0.0263949	-0.0595011	-0.0116944	-0.0194738	0.0452817	0.00697161	0.0224788	-0.0114931	0.0461806	-0.0269415	0.0235124	-0.0339045	0.0729766	-0.0329974	0.0479676	-0.0311709	0.00235911	-0.00236297	-0.0154628	-0.0399945
BCKDHB_P21953	0.0641046	0.0635426	0.157661	-0.0285717	-0.0462346	-0.0392122	0.026766	0.0187661	-0.0619697	-0.0421524	0.0408609	0.0576936	-0.0190134	0.0734232	-0.117947	-0.0864868	0.00628253	-0.00631001	0.0298171	-0.0631701	0.10608	-0.0615213	0.108971	0.0579858	-0.0227169	-0.0174802	0.069067	-0.0392695	0.249782	-0.01215	0.159455	-0.0348001	-0.0406398	-0.00964193	0.0443305	0.0333701	0.0823618	-0.0312625	-0.0294459	0.00572061	0.120685	0.00304215	0.0234434	-0.0860529	-0.00304858	0.150673	-0.0291734	-0.0148103	0.336249
CDC27_P30260-2	0.0693584	-0.0452683	0.0584475	-0.0332167	0.0383071	0.000886098	0.0428069	0.00666697	-0.0550263	-0.0694743	-0.00726619	0.0279347	-0.000886642	-0.0359048	0.0116076	-0.0359711	0.0870675	-0.0177332	0.0750307	-0.0176678	0.0173081	-0.0469163	-0.00160166	-0.0218284	-0.0243029	-0.0595476	0.00159989	-0.0435199	0.0565189	0.0183933	0.0208707	0.00536708	0.0086473	-0.0467065	0.0386521	-0.0188226	0.00185119	0.00425361	0.0231758	0.00700353	-0.0305607	-0.017058	-0.00185356	-0.0241386	0.0744631	-0.0365451	0.00863124	-0.0228787	-0.116509
CDC27_G5EA36	0.0419279	-0.136163	0.0377851	-0.18401	-0.137334	0.101336	-0.00754697	0.0702169	-0.274331	0.21035	-0.0170403	-0.301394	0.274429	0.00750769	-0.0754835	0.287105	0.0710269	-0.151153	-0.00436841	-0.0615253	0.105912	-0.102374	0.0118142	-0.126789	0.0533046	-0.271621	-0.0426015	-0.235889	0.0382992	0.240785	0.0221668	0.00435522	-0.0230023	0.0185309	0.0350547	-0.018772	0.120873	-0.026305	-0.0394225	0.0483035	-0.0539813	0.104704	-0.124734	-0.0539243	0.0760543	0.055341	0.130073	-0.154734
U2SURP_O15042	0.0103046	-0.054821	0.00947989	-0.038182	0.0208851	-0.0235579	0.0254474	-0.00144117	0.0316707	0.00143973	0.00576525	-0.0681049	-0.00971442	0.00438387	-0.03397	-0.029709	0.0203769	-0.0174761	0.0208953	-0.0296066	-0.000742904	0.0263797	0.0705964	0.00571815	-0.0106471	-0.052146	-0.0406057	-0.0737585	0.00988427	0.0400887	0.000742522	-0.00541442	-0.0749776	-0.0812426	0.0556584	0.0365083	0.0131976	-0.0893373	0.0158373	-0.0253139	0.0176361	-0.0766015	0.00881178	-0.0150035	0.0438168	0.0868198	-0.00886593	-0.0277925	-0.0782236
U2SURP_O15042-2																																	-0.207909	0.437737	-0.24071	0.00506649	0.0220947	0.0946109	-0.274566	0.311535	0.216914	-0.0259175	-0.00508434	0.0992991	-0.0809484	0.0218716	-0.0266287	-0.0298771	0.741808
SINHCAF_Q9NP50																	-0.299264	-0.564592	-0.162652	0.226734	-0.329328	0.226891	0.366693	-0.466828	-0.0360905	0.149819	-0.0669077	-0.243671	0.287673	0.0927575	0.244205	0.0352097	-0.0685182	-0.0992639	0.963762	0.147811	-0.0398292	-0.0165613	0.176491	0.0354022	0.0163734	-0.337571	-0.398871	-0.236098	0.325127	-0.0647231	0.0378941	0.149733
EXOSC10_Q01780	0.0509172	0.0535699	-0.0198504	0.17357	-0.0155156	-0.0190368	-0.0188985	-0.00906908	-0.00178934	0.0353759	0.007469	-0.0376822	0.0438409	0.00797062	0.000469537	-0.00046969	0.0156904	0.0733909	0.0474998	0.0900218	-0.00234419	-0.0600391	0.00234038	-0.0102696	-0.0481432	-0.082558	0.0294326	0.0640429	-0.0538375	0.0193813	-0.0193357	-0.0101695	-0.0811	-0.0426369	-0.0120006	0.000605975	0.0256139	-0.000606229	-0.0132562	0.0147896	0.106262	-0.0381025	0.137643	0.0661072	0.00369434	0.0725871	-0.0524179	-0.0649564	-0.077074
TFRC_P02786	-0.0428228	0.0154039	-0.026902	-0.0291121	-0.0227595	0.0125477	-0.0032632	0.0313836	-0.0852618	0.0409549	0.00325584	0.0197779	-0.0508795	0.0177341	-0.044421	0.0256356	-0.0234581	-0.00750447	-0.0263617	0.0215764	-0.0178975	-0.0274283	-0.0378715	0.00746564	0.0128787	0.0897277	0.0182465	0.0189811	-0.0349327	0.0464824	-0.0115358	0.0346732	-0.0682141	0.0115852	-0.0376805	0.0106886	-0.0255112	0.0356035	-0.0149513	0.0371854	-0.0462023	0.0459956	-0.0193641	0.0400697	-0.0328662	0.0100577	-0.0101283	0.0110487	0.0529169
TFR2_Q9UP52	-0.00445431	-0.0264732	-0.0291418	-0.0408303	0.0360247	0.0479631	0.0256285	0.00444059	-0.0551541	0.089816	-0.00626309	-0.0368454	0.0833081	0.0271416	-0.00480893	0.0677369	0.0338485	0.000720651	0.056486	0.0937573	-0.0187661	-0.0142395	-0.0292125	-0.00573413	0.00805907	-0.000721011	0.069561	0.0458228	-0.0558744	0.0105428	-0.0032335	-0.0134067	-0.0606555	0.0426961	-0.0173496	0.00966068	0.0239696	-0.0392709	-0.00607631	0.0331092	0.0125929	0.00605082	-0.014691	0.0670942	-0.0893821	-0.0199123	-0.0462319	0.0103926	-0.137294
FH_P07954	0.0626527	-0.0325208	0.0678262	-0.0132833	0.00952368	-0.0111916	0.070733	-0.00958697	0.0389627	-0.011695	0.0427792	-0.0437099	0.0125617	-0.0215515	0.0110045	-0.0171974	0.0221579	-0.068524	-0.0106779	-0.0718375	0.073356	-0.0340268	0.0958672	0.00283429	0.00930889	-0.0666606	-0.00696496	-0.0704068	0.108801	0.00683715	0.0750911	-0.00283987	0.0042505	-0.024125	0.0419001	-0.0264851	0.0303997	-0.0290379	0.0528906	-0.0361946	0.0168337	-0.0378362	0.022809	-0.0556076	0.0923494	-0.00426306	0.0691702	-0.0110623	0.103992
TLN1_Q9Y490	0.0203886	-0.0123473	0.0157465	-0.0480469	0.0012451	-0.00124618	0.0181584	-0.0112895	0.0154882	-0.020838	-0.0099508	-0.0260878	0.0194222	-0.0208708	0.00961866	0.0140677	0.0346017	-0.00135373	0.0165818	-0.0120618	0.00135247	-0.0515287	0.0158528	-0.039268	0.0430065	-0.00181645	0.0123239	-0.0220847	0.0192705	-0.0140393	0.0128302	-0.0152813	-0.00106115	0.00106037	0.0214819	-0.00744911	0.00505457	0.00549666	0.018058	-0.0120629	-0.00270179	-0.00999269	-0.0058982	-0.0113919	0.0250363	-0.00675935	0.0229566	0.00734187	0.0477329
TLN2_Q9Y4G6	0.028314	0.00479869	0.0314007	0.210248	-0.0225686	-0.0180024	-0.00149889	0.00149733	-0.0910322	0.00612403	-0.0267297	-0.0146585	0.0301709	0.026373	-0.0241653	-0.00738216	0.0219407	-0.023429	0.0175954	-0.0587047	0.0360771	0.482237	0.0383431	0.0324236	-0.0571103	0.00766451	-0.0118425	-0.027477	0.00585445	-0.0689269	-0.00587831	-0.0270078	0.0315637	-0.0580084	0.0284547	-0.0231422	0.00945161	-0.0192868	-0.00711707	-0.00230743	0.0977299	-0.0265435	0.0178308	-0.00599679	0.0262207	0.0154705	0.00230375	-0.00413701	-0.0344315
RPL17_P18621-3	-0.109647	-0.00805025	-0.0760778	-0.0700961	0.0527469	0.044831	-0.0312023	0.0204218	0.23482	-0.0720873	0.0209469	-0.0402433	0.00800558	0.123944	-0.0201865	0.053818	-0.119245	-0.0789879	-0.0741321	-0.0558437	0.0272057	0.0464999	0.0411134	0.102254	-0.0526522	0.0134277	-0.0653787	-0.0382814	-0.00406518	0.0768186	0.00405376	0.0583581	-0.0888468	-0.0125185	-0.00493258	-0.0328196	-0.0177964	0.00943118	-0.00283091	0.0127308	0.0173449	0.00535922	0.011647	0.00282536	0.0142316	0.0388302	-0.0157062	-0.0275359	-0.221239
TOMM70_O94826	0.148692	-0.105064	0.11595	-0.0404061	0.0282749	-0.0690874	0.0957619	-0.0888916	0.0385538	-0.0406111	0.0465104	-0.0238728	0.0234842	-0.0738983	0.0273153	-0.112496	0.0482949	-0.0817508	0.0361085	-0.117033	0.189197	0.191704	0.236965	0.0289828	-0.029577	-0.200374	-0.0540027	-0.15437	0.184456	-0.104235	0.135129	-0.121283	0.102768	-0.0618816	0.086776	-0.0937283	0.0159691	-0.0419028	0.0760645	-0.112282	0.0832945	-0.118897	0.0886781	-0.109923	0.111626	-0.0327203	0.0983811	-0.0161478	0.181727
B3GALT6_Q96L58	0.00563403	-0.160469	-0.142616	0.14574	0.013138	-0.106504	-0.0105333	0.0919259	-0.0134623	-0.119174	0.0501485	-0.00565611	0.0314841	0.0782622	0.0159609	-0.0655976																	0.184748	-0.0416071	0.379179	0.0874337	0.291027	-0.200435	-0.171414	-0.173112	-0.318574	0.0225536	-0.0229118	0.140359	0.27831	0.258943	-0.182187	-0.0418386
BMP1_P13497
MYBBP1A_Q9BQG0-2	0.0401847	0.0154158	0.0367984	0.00441266	-0.0578261	-0.0561597	0.0239031	0.0727527	-0.00442619	-0.130945	0.0330482	-0.0554027	0.0478303	-0.0534114	-0.0111648	-0.0252648	-0.0306966	-0.016616	0.00169532	-0.0220492	0.0692586	-0.00600027	0.0180938	0.0441947	-0.00169731	-0.0747943	-0.089916	-0.114864	0.0492665	0.109163	0.0592043	0.0423741	0.0841077	-0.0901871	0.037205	-0.0269733	0.0265552	-0.0658829	-0.00980202	0.0236197	-0.0142224	-0.0930457	0.0125581	0.0107886	0.0119296	0.00973587	-0.0484977	-0.0737958	-0.0743963
NSUN5_Q96P11-2	0.0687692	-0.0308515	0.178393	-0.0186845	-0.0412326	0.0661181	0.0661645	-0.0263419	0.033208	-0.0327487	0.00665105	0.000731281	-0.000731652	-0.051574	0.0315086	-0.00901719	0.0599624	0.0298604	-0.000748994	0.042693	0.000134038	-0.148676	-0.0073263	0.0614515	-0.018695	-0.00342682	-0.0211038	-0.0143422	-0.000134051	0.0652426	0.0266604	0.0318896	-0.0145651	-0.0596469	0.0181033	-0.0108183	0.0246568	-0.0400274	0.0260443	-0.00251553	-0.0876773	0.00251115	-0.0746803	-0.0855471	0.00850864	0.0212767	0.0356767	0.0237773	-0.107679
CBR4_Q8N4T8	-0.0281518	-0.00287073	0.124911	-0.0893201	-0.0521521	0.0480177	-0.0486612	0.0161154	0.0263683	-0.0200022	-0.0161239	0.0674301	0.128481	0.00286503	-0.0193136	0.150011	-0.182757	-0.0859794	-0.170846	-0.0654118	0.213532	0.447145	0.325871	0.215427	-0.0422944	-0.000129837	-0.0608703	-0.0749262	0.0577688	0.0383696	0.0256829	0.000129825	-0.0342451	-0.105469	-0.0305249	0.0315061	0.000519231	0.0246326	0.0214611	-0.144671	-0.000519418	-0.0594587	0.0597921	0.0366416	0.0365624	0.0578156	-0.14943	-0.136406	0.361862
WARS_P23381	-0.00881056	0.0159774	-0.0598566	-0.0258015	-0.011484	0.0512043	-0.0542919	0.00832377	0.194301	0.378875	0.0179732	-0.0360796	-0.0325086	0.113639	-0.00837207	0.0628312	-0.105454	-0.0588745	-0.131759	-0.0899164	0.0771844	0.185524	0.0956042	0.147448	-0.115728	-0.00627828	-0.0409456	-0.0100066	0.0531263	0.00625108	0.0474412	0.101479	-0.133708	0.00372106	-0.0512461	-0.00873008	-0.0549987	0.0429854	-0.0137773	0.009067	0.0735249	0.0139065	0.0771998	0.0297734	-0.0188046	0.071289	-0.00373068	-0.0115903	-0.0131185
WARS1_G3V277	0.0631007	0.0285841	-0.265113	0.0535132	-0.0730523	-0.122485	-0.109546	-0.17625	-0.28031	0.0264297	-0.114072	-0.0269229	0.0569063	0.0848039	0.0979093	0.206462																																	0.106578
WARS1_G3V456
WARS1_G3V5U1	0.420517	-0.0499654	0.524668	0.477401	-0.0457467	0.0155999	-0.0189158	-0.0354706	-0.233674	0.177132	-0.228316	0.154079	-0.0157704	0.411148	-0.148323	0.0647161																																	-0.305119
CTNNA1_P35221	0.0303305	0.0408379	-0.0109775	0.030326	0.00628538	-0.0212597	0.0192866	0.0477024	0.00145415	-0.0312269	-0.022224	-0.0273257	-0.00145561	0.00422471	-0.0296774	-0.0244173	0.040811	0.0387205	0.00368896	0.0346836	-0.00369842	-0.0444985	-0.0434194	-0.0336487	0.0212736	0.0569457	0.0720752	0.0564602	-0.00841947	-0.0302071	-0.037806	-0.013675	-0.00719315	0.0323047	-0.0144526	-0.0107661	0.000318147	0.0395867	-0.000209831	0.00338306	0.000209801	0.0409163	0.134273	0.0782668	-0.0166808	-0.00317841	-0.0188212	-0.0091061	-0.120379
CTNNA2_P26232	0.0288108	-0.0804383	0.0419003	0.0276104	-0.0201883	0.0075243	-0.027846	0.0372306	-0.0461473	-0.0778935	-0.00316975	0.0031628	-0.0320307	0.029143	-0.0332309	0.0305452	0.0357078	0.0312458	0.0538476	0.0645961	-0.0448852	-0.16644	-0.134488	-0.102194	0.0563461	0.0760614	0.0675007	0.0173005	-0.109288	-0.122147	-0.0869574	-0.0175105	0.0218024	-0.024107	-0.0457546	0.00751972	0.0220748	0.048092	0.0155331	0.0407242	-0.0628767	-0.00755912	0.00910121	0.0325773	-0.0558362	-0.0257253	-0.0175817	-0.0397848	-0.147998
EFHD2_Q96C19	-0.0110016	0.00355181	-0.0455314	0.00393452	-0.0232372	0.0703411	-0.00356058	0.0840961	-0.0462568	0.0515553	-0.0187435	0.0553307	-0.016972	0.0861227	-0.0206533	0.0354724	0.00335811	0.0514929	0.00481713	-0.0150718	-0.0674657	-0.122204	-0.0931519	-0.00724263	0.021683	0.107596	0.0717692	0.0978357	-0.0260423	-0.00336595	-0.0247672	0.0439119	-0.0895099	0.00290143	-0.0452428	0.0373633	-0.0208432	0.0972481	-0.0389503	0.0189823	-0.00290728	0.0706955	0.00545973	0.0846455	-0.0872121	0.0123812	-0.022096	-0.00401481	-0.154484
EFHD1_Q9BUP0	-0.0489537	0.0701769	-0.0472523	0.0488088	-0.0359558	-0.000266193	-0.00752322	0.0569906	-0.0544738	0.122948	-0.0904901	0.0255969	-0.0762136	0.0486209	0.000266144	0.0290648	-0.0281134	0.202911	0.0295637	-0.115559	0.171718	-0.35156	0.0464351	0.0566479	0.027576	0.100718	0.135696	-0.0671747	-0.0650618	-0.195701	-0.16566	-0.121817	0.0193292	-0.00991113	-0.0207018	0.0109327	-0.0588441	0.0725196	-0.0149186	-0.017812	0.0716037	0.0510279	-0.0239574	0.0603073	0.00174755	0.05382	-0.0412941	-0.00174967	-0.0559804
EGLN1_Q9GZT9	-0.00248588	0.0024816	0.0104403	-0.0595993	0.0658151	-0.00403625	-0.0047497	-0.0421757	0.0747012	-0.0720629	0.0132964	-0.068293	0.105264	0.0841388	0.0165861	-0.0991659	0.0294233	0.00264819	-0.0669457	-0.0425419	0.0411242	-0.00229335	0.0714659	0.00211963	0.0232325	-0.0259428	-0.00212275	-0.0694724	0.0273717	-0.0410373	0.0220677	-0.0568922	0.00578225	-0.0641959	0.0310948	0.0292079	0.225076	0.173756	0.0331636	0.0247369	-0.0554527	-0.0340877	-0.0509649	-0.00100397	-0.0380717	-0.0387407	0.00100327	-0.0592156	0.0606133
MRPL11_Q9Y3B7	0.0136941	-0.00754762	0.0782598	0.0724285	-0.0311784	0.00794125	0.0919689	-0.0195329	-0.0962405	-0.0690313	0.0408821	0.0109337	0.00218602	-0.145266	-0.00218934	-0.077307	-0.100217	-0.00823299	-0.0121361	-0.023441	-0.0195282	0.0393838	0.0771229	-0.0664971	0.0169842	-0.137664	0.0236712	0.00164328	0.0149641	0.00693322	-0.00164515	0.0148525	0.0719368	-0.000256787	0.0471686	-0.0128364	0.0543185	0.0182229	-0.00427691	0.0292478	-0.0463759	-0.0820195	0.0622141	0.000256741	0.0556529	-0.022532	-0.00268874	-0.0553643	-0.159414
CHFR_Q96EP1																																	0.00769081	0.00660515	0.0209607	0.0776882	0.0621784	-0.0165576	0.0385682	0.0659881	-0.00663553	0.0396998	-0.0347818	-0.0291641	-0.0922179	-0.0195934	-0.0186096	-0.100536	0.292413
RUFY1_Q96T51	0.021714	0.0333619	0.0207524	-0.00201551	0.00145044	-0.0241041	-0.0302496	0.00666135	0.0214344	-0.0571545	0.0131435	-0.0384647	0.0459157	-0.0172864	-0.0152472	-0.0014519	0.0507939	0.0627582	0.0322579	0.0228715	-0.0115505	-0.0299586	0.00133174	-0.0242813	0.0487813	-0.00987001	-0.039146	-0.0424401	-0.0214779	0.00301108	-0.00133297	0.0317164	-0.00150155	0.0525524	0.00464019	0.0399173	0.0313259	0.00331265	-0.0481323	0.0440294	0.00149999	-0.00763475	-0.0546471	-0.00475932	-0.0602819	-0.0404765	-0.00974226	0.0142233	-0.112488
RUFY2_Q8WXA3-1	-0.00719647	0.00716075	0.0798218	-0.490855	-0.573367	-0.492349	-0.438656	0.2269	0.188979	0.164121	-0.0194748	0.0521285	-0.370106	-0.189772	0.114032	0.0220389	0.111961	-0.00324639	-0.0799138	-0.118446	-0.10971	0.0915237	0.128758	0.103623	-0.350117	-0.00585476	0.0155876	0.128079	-0.0281634	-0.193877	0.0032391	0.0173618																	-0.117896
USP14_P54578	0.0298162	-0.00794131	0.000653543	-0.0108317	-0.00414445	0.0227065	-0.0107454	0.0253554	0.013956	-0.0411316	-0.000572817	0.000572589	0.00690793	-0.0211217	-0.0203119	0.0235377	0.00420179	0.00641272	-0.0130085	-0.044273	0.114048	0.0899612	0.103162	0.112225	-0.0333505	-0.025908	-0.0181873	-0.0297461	0.0920989	-0.00421407	0.0629981	-0.0152471	-0.0459765	-0.0185822	0.0386347	-0.000900408	-0.00194735	-0.00365372	0.00800945	-0.0160178	0.0917896	-0.0223491	0.0503601	0.00411296	0.000899846	0.074852	0.0041891	-0.00255223	-0.0404247
RUFY3_Q7L099-3	0.0385725	0.019	0.0223566	-0.0117453	-0.00374884	-0.0352645	-0.109646	-0.0168957	0.0856635	-0.099266	0.0422109	-0.0654296	0.0619193	-0.0485862	0.00373913	0.0275138	0.00601607	0.0407391	-0.0122939	0.027896	-0.000260534	-0.0208128	0.00529042	0.0248197	0.0109597	0.0160733	-0.0373307	-0.0614787	0.000260487	-0.00227723	-0.00281303	-0.0150332	-0.0815873	0.0447062	0.0122529	0.0044874	0.031188	0.0264515	-0.0159921	0.000745606	-0.0200423	-0.0349657	-0.000745991	-0.0253421	-0.0174918	-0.0552768	0.00140446	0.0103246	-0.156681
RUFY3_Q7L099-2	0.0873565	-0.0570798	0.0207574	-0.0261163	0.0927386	-0.157479	-0.0210604	0.0726329	0.0279158	-0.156126	0.0245687	-0.0694914	0.0347043	-0.0502759	-0.0783633	0.369569	-0.115314	-0.0378495	-0.0839925	-0.0403834	0.323586	0.585919	0.427576	0.389999	-0.0887693	-0.20915	-0.0939079	-0.117722	0.199162	0.242004	0.0368819	0.163874	-0.0183151	-0.137365	-0.0697745	0.0430903	0.0620527	0.0180855	0.0554587	0.0420021	0.113599	-0.0379006	-0.127684	0.06709	0.0689743	-0.0556652	-0.0226931	-0.136645
STRIP1_Q5VSL9	0.00121531	-0.00853363	0.042419	0.0225617	-0.0813704	-0.0424705	0.00674491	0.052215	-0.0313555	-0.02044	0.000801114	-0.0175585	0.0124726	-0.000801559	-0.0427432	0.0164348	-0.00932257	0.0155728	-0.00163007	0.0555524	0.00162824	-0.0187093	0.0611319	-0.0617448	0.0166294	-0.0458621	-0.0173546	-0.0307544	0.0225629	0.0367004	0.025025	-0.02053	-0.0112834	-0.00707507	0.0405732	0.0203339	0.0536667	0.00666927	-0.00670025	-0.0148316	0.00788585	-0.0576014	0.0169879	-0.00942571	0.0183458	0.0399596	-0.0276046	-0.0286988	-0.14753
STRIP2_Q9ULQ0	-0.00885734	0.0258904	0.0204376	-0.0337511	0.00526867	-0.0354013	0.0452189	-0.0190884	-0.0482687	-0.00267852	0.0241031	-0.0174474	0.00267355	-0.0196958	0.0766347	0.0263386	-0.000310047	0.000309981	-0.0142583	-0.0454103	0.105984	0.0523951	0.0654807	0.0384334	-0.0542981	-0.0807851	-0.044414	-0.0731558	0.0555235	-0.0550354	0.00155614	0.000750062	-0.103854	-0.000552138	0.00130976	0.0382	0.0597115	0.0716241	-0.0671765	-0.00692564	-0.0228572	0.0179846	-0.0503449	0.000551927	-0.0226371	0.0113337	-0.0234053	0.0124881	-0.111629
ATF7_P17544-6	-0.180649	0.00963527	-0.254868	-0.00970005	0.125951	0.122281	0.305045	-0.195499	0.334169	0.0390105	-0.069292	0.200295	0.0493107	-0.217276	-0.0536004	-0.0756099	-0.120361	-0.10225	-0.117263	-0.127052	0.122096	0.240343	0.108195	0.118421	-0.151091	-0.0487863	-0.0648498	-0.0349705	0.137274	0.0341429	0.0851099	0.035419	-0.190051	0.00924909	-0.116307	0.0488241	0.111728	-0.00930877	0.0486224	0.0955198	-0.0424723	-0.0466375	0.199008	0.143962	0.117344	-0.044058	-0.144413	-0.144535	-0.303459
ATF2_P15336	-0.00857157	-0.0883829	-0.0605459	-0.142903	-0.0229756	0.00852094	-0.121328	0.033182	0.113463	0.0603975	-0.13019	0.132097	0.0776094	0.0987854	-0.0910211	0.0364945	0.03208	-0.000854406	-0.0531011	-0.0639052	0.0008539	0.213952	0.169853	0.157909	-0.0408357	-0.126117	-0.0446508	-0.0686725	0.122492	-0.0122064	0.0342652	0.0410194	-0.111614	-0.0291013	-0.0263664	0.0777059	-0.0476407	0.0089949	0.017726	0.0344144	0.0551357	0.0566722	-0.0194426	0.16862	-0.0152654	0.0356502	-0.00905133	-0.0315527	-0.0768366
ARID1A_O14497	0.0470166	0.00601151	0.0412411	0.163078	-0.0145614	-0.0434836	0.0234048	0.024539	-0.12567	-0.0107504	-0.00289962	-0.0591151	0.017486	-0.055851	0.00289381	-0.00374798	0.0265024	-0.0159727	0.0461088	0.0154853	0.0140517	-0.0201226	0.0156358	-0.0491004	0.0294385	-0.0377371	-0.0337228	-0.0633948	-0.00705025	0.00701597	0.0262487	-0.00761122	0.0374775	-0.0451936	0.00775824	-0.0186745	0.026157	-0.0355714	0.0109387	-0.0237861	0.0169163	-0.0732062	0.00254621	-0.0316315	0.0158514	0.0366076	-0.00255071	-0.0041365	0.0234412
ARID1B_Q8NFD5-3	-0.00998664	0.0777545	0.00608202	0.0789314	-0.0429022	-0.068639	-0.0109306	0.0262199	-0.00610776	-0.0856848	0.0183616	0.0143831	0.00673625	0.0240801	-0.069088	-0.0436462	-0.0155076	-0.0448487	0.00260774	0.0267879	0.131718	0.177342	-0.0136283	-0.00760037	-0.0144041	-0.0868074	0.0489934	-0.00261246	0.0813938	0.0450627	0.138623	-0.0648729	-0.0639583	-0.0260007	0.0374983	0.0272807	0.00808756	-0.0939466	0.11391	-0.0651247	0.0671234	-0.0266676	-0.0133107	-0.00813316	0.0634035	0.0578546	0.0633814	-0.0252681	0.0153381
PPP1R35_Q8TAP8	0.111318	-0.0658839	0.0401828	-0.00385564	-0.0691084	0.0763845	-0.0356403	0.00384536	-0.137845	0.0454007	-0.0173614	0.0524523	0.129459	-0.123975	-0.0290154	0.124576	0.103478	-0.0945228	0.090231	0.0583476	-0.0224779	0.106495	0.0221331	-0.0606652	-0.0662967	0.0549399	0.184809	-0.0681927	0.118593	-0.221692	-0.179385	-0.114372	-0.121182	-0.0586055	-0.042859	0.205001	0.00778206	0.275455	-0.040798	0.0573374	0.0377634	0.0458236	-0.0114087	-0.0377903	-0.00782426	0.126209	-0.0225209	0.0580951	-0.282774
FYCO1_Q9BQS8-4	0.0404175	0.0331138	0.00159354	0.0893367	-0.0362634	-0.000216228	0.000216196	0.0743089	-0.0571653	0.0187505	-0.00165549	-0.0364365	0.0382145	-0.019056	-0.0221922	-0.00209311	0.0337317	0.237841	0.203623	0.149166	-0.0345393	-0.17383	-0.103556	-0.12528	0.0868752	0.0393277	0.261275	0.196146	-0.119807	-0.0802519	-0.0606231	-0.0436034	-0.0287294	-0.0239722	-0.0111239	0.0729828	0.0479048	0.0240739	0.0192948	0.0615035	0.0349082	-0.0124435	-0.00701676	-0.00485269	0.00234059	0.0427911	-0.0023444	-0.03635	-0.177138
BLOC1S4_Q9NUP1	-0.28141	-0.00382282	0.00381272	0.0846075	-0.0842095	-0.101981	0.00585756	-0.0664167	0.133183	-0.0620129	0.0316734	-0.0755233	-0.013718	0.0477941	0.0468763	0.0874339	-0.0283	-0.0368575	-0.080854	-0.0191646	0.0484518	0.0454672	-0.00261732	0.0540038	0.00242555	-0.0153653	-0.00242963	-0.0580004	0.0254734	0.0499742	0.0568797	0.0709599	-0.0346832	0.00613859	-0.0852962	-0.0538694	-0.157629	0.00436398	0.0256552	0.0434464	-0.0343018	-0.048678	0.0808026	0.00438473	0.0159768	-0.0273686	-0.00437722	0.0587752	-0.0995615
GYS1_P13807	0.0998434	-0.0219739	-8.55126e-05	0.0673343	-0.0784337	-0.0320593	-0.076612	8.55076e-05	-0.0152549	0.0872417	-0.0205526	-0.00394347	0.215242	0.192541	0.00554517	0.118533	-0.148956	0.0527473	0.00666362	-0.0270349	0.0395479	0.0512069	-0.0573393	0.0158338	-0.00114907	0.0524465	-0.0317427	0.00861766	-0.039705	-0.0024935	-0.066238	0.00114815	-0.0766985	-0.0428525	-0.0326679	0.161236	0.0143873	0.000315428	-0.03164	0.0190613	0.0265137	0.0834132	-0.021846	0.0545766	-0.000315497	-0.00853112	-0.024709	0.0661902	-0.0957541
NDUFA8_P51970	-0.00417218	0.0200912	-0.0843595	-0.025548	0.00416015	-0.0388257	-0.0126068	0.00863261	0.105742	0.0119451	-0.0478211	0.00959232	-0.0780891	0.0317344	-0.0471253	0.0133834	-0.00961796	-0.0269157	-0.132422	-0.0470737	0.112124	0.238204	0.111022	0.147373	-0.102275	-0.0633075	-0.0681623	-0.0376063	0.0780131	0.122852	0.00955427	0.0241414	-0.00534964	-0.0431334	0.131966	0.0579632	0.0166884	0.0658365	-0.0302784	-0.0183973	-0.024864	0.0584805	-0.0136974	0.00441129	-0.00607219	0.118342	-0.00442482	0.0915571	0.541914
HSPA1A_P0DMV8	0.0274946	0.0136431	-0.0280311	-0.0415326	0.0636041	-0.00562975	0.0116947	-0.0635059	0.181558	-0.0277455	-0.00695979	-0.0528256	0.00560787	0.0623829	0.0201734	-0.0368819	-0.00554957	-0.0579221	-0.0857539	-0.0707541	0.139586	0.27764	0.214642	0.186403	-0.0602157	-0.0729928	-0.0969069	-0.073765	0.119108	0.00552831	0.0779352	0.0157617	-0.0394469	0.0202077	0.00941488	-0.00620859	0.0144455	0.028623	0.00295338	0.00482819	0.0331529	-0.00864968	-0.0137383	-0.0472721	-0.00619464	-0.00295943	0.0158636	-0.0141544	0.0161235
HSPA1L_P34931	0.308546	-0.13309	-0.081653	-0.108765	0.15155	-0.236199	0.0149379	0.288413	-0.180273	0.18412	0.0668808	-0.0237724	0.134257	-0.199141	0.0854691	-0.0150942	-0.0374323	0.0477867	0.0247108	-0.00427117	0.0899899	-0.0110195	-0.0772982	0.00425856	0.0738789	-0.0168484	0.0381931	-0.0142115	-0.0351441	0.0463349	0.0730232	-0.0807849	0.0215217	0.144052	-0.0794244	-0.0246516	0.0812558	0.127663	0.0172327	0.0677942	0.153935	-0.017441	0.115772	-0.0782412	-0.0195769	-0.148343	-0.0669297	-0.193377	0.00768516
HSPA5_P11021	0.0257145	0.00959042	-0.00325344	-0.052425	0.0472466	-0.010396	0.0272125	-0.0241238	0.0472109	0.0410863	-0.00135086	-0.00930146	0.00134959	-0.00351718	0.0232842	-0.0316844	-0.0147499	-0.0834821	-0.0729873	-0.0856457	0.00453056	0.0822192	0.0183041	0.0491485	-0.0491329	-0.00454483	-0.0898915	-0.0645896	0.0380862	0.0234455	0.0085973	0.00555637	-0.0529708	0.0108211	-0.00546663	-0.0358831	-0.0308306	0.0603635	0.00551268	-0.0115798	-0.0341284	0.0324395	-0.0722106	-0.0407325	0.0278737	0.005446	0.0252406	0.0318707	-0.00687944
HSPA6_P17066	-0.000662477	-0.00574196	0.0124405	-0.0727655	0.0657601	0.00472069	0.0688691	0.000662173	-0.0590398	0.038158	-0.00697528	-0.0187855	0.00575591	0.0186009	-0.0150398	-0.0384067	0.0431437	0.0573916	0.0221716	0.0728478	-0.020502	-0.148762	-0.0782906	-0.040033	0.0278455	0.0747062	0.0244452	0.0202147	-0.0309874	-0.10145	-0.0574255	-0.0329565	0.189157	0.233455	0.207486	-0.00296912	0.126231	-0.0715812	-0.174234	-1.25006	0.00296302	-0.497854	-1.21398	-0.166441	0.0107288	-0.477507	0.205843	0.114105	-0.0419552
HSPA9_P38646	0.00945167	0.00914193	0.00481471	-0.0683564	0.0675284	-0.0391441	0.0546017	-0.0866334	0.0280105	-0.00483083	-0.0206024	-0.0620965	0.0234669	-0.008854	0.0320768	-0.0707918	0.0609379	-0.0348984	0.0106074	-0.086371	0.0365956	0.00495509	0.0495256	0.002758	-0.00276329	-0.0260706	-0.00947681	-0.0607399	0.0579152	-0.0758721	0.0493984	-0.044252	-0.0309825	-0.00977553	0.0206231	-0.0323492	-0.00120821	0.0012072	0.0148111	-0.0169914	0.0276379	0.00858998	-0.0356261	-0.0490425	0.012107	-0.0115901	0.0220838	0.0106476	0.00468236
HSPA8_P11142	0.0197239	0.00360314	-0.0112205	-0.0597285	0.0511134	-0.00794988	0.0105276	-0.0394455	0.0866388	0.0320748	-0.00746132	-0.0483628	-0.00361216	0.00816865	0.00534946	-0.0463111	0.0426975	-0.0061779	-0.0127465	-0.00803365	-0.00404372	-0.00684272	0.00768075	0.0155589	0.0101439	0.0172428	-0.0126812	-0.0155063	0.0255193	-0.0133373	0.00403242	0.00530105	-0.0273013	0.0282699	0.00285967	-0.017154	-0.0189395	0.0286579	0.00126062	-0.00320856	0.0187535	0.00719039	-0.013419	-0.0249426	0.0045054	-0.0117966	0.0104885	-0.00126172	0.0917389
HSPA8_E9PN89	0.0127233	-0.0915696	0.0438629	-0.126064	0.114548	-0.0151167	0.136656	-0.0491793	-0.390127	0.347183	-0.17689	-0.0128365	0.122585	-0.116107	0.0589241	0.103825	0.316721	0.444469	0.232258	0.36505	-0.169842	-0.561645	-0.816745	-0.595749	0.497947	0.141702	0.220356	0.116904	-0.165443	-0.62144	-0.368568	-0.127218	0.0549222	0.233775	-0.147437	0.0828961	-0.0635538	0.0709411	-0.181978	0.16295	-0.435338	0.0181718	-0.158043	0.00711523	-0.162104	-0.276827	0.0416819	-0.0071505	-0.281863
HSPA8_E9PK54	-0.233495	0.032207	-0.232317	0.00558943	0.000784421	-0.0259552	-0.0320977	-0.0303909	-0.000784847	0.0519784	-0.00784238	0.0359601	0.154289	-0.0240784	0.0439292	0.0857843	-0.00358118	0.106582	0.0688622	0.0237034	-0.0497832	-0.237236	0.129678	-0.179262	0.126913	-0.0235116	0.111757	0.00363639	-0.136799	-0.113462	-0.097055	0.00357231	-0.137569	0.18525	-0.147631	0.0830243	0.0264035	-0.0188889	0.0709944	0.1453	0.0704264	-0.119369	-0.051764	-0.0477008	0.0186448	-0.109754	-0.0307459	0.046134	-0.173855
HSPA2_P54652	-0.0524077	-0.00814299	-0.228219	-0.0980488	0.102729	-0.0794873	0.104296	0.0571375	0.106638	0.0804395	0.00809729	-0.0411897	0.102487	-0.0292716	-0.0110894	0.0834547	0.085754	0.0588621	0.150719	0.561801	-0.151044	-0.362722	-0.0679663	-0.15142	0.0698896	0.492003	0.327528	0.154623	-0.170355	-0.113186	-0.0613662	-0.216579	0.0527986	0.0385917	-0.110501	-0.045332	0.064747	-0.0985309	0.0303518	-0.00890646	-0.0810258	-0.0764666	0.048606	0.0241134	0.00885182	-0.0568456	0.0692847	-0.060336	-0.093058
SFXN2_Q96NB2	0.0268405	0.0124246	-0.0452418	0.104602	0.0210423	0.0728831	-0.00137996	-0.0383407	0.00137864	-0.146176	-0.00579501	-0.100323	0.019563	-0.0622229	0.0407979	-0.0656124	-0.106302	-0.00439811	0.00438474	0.0960549	0.0428911	0.235199	-0.00969453	0.1559	0.0557794	-0.202096	-0.0471074	-0.153983	0.0389439	-0.116269	-0.103551	0.0299972	-0.0920541	-0.0867726	-0.0315702	0.0217065	0.0807919	0.0216157	-0.0882296	0.00724587	0.0467304	-0.0203355	0.00354932	0.00943636	-0.067682	0.0799919	-0.0805914	-0.00355808	-0.125988
NCOR2_C9J0Q5	0.181418	0.0340974	0.0758257	-0.0269454	-0.023851	-0.0313356	-0.00296817	0.0689458	-0.0036273	0.160743	0.00057531	-0.0159602	0.0906779	-0.00057554	-0.0449474	0.0402851	0.024209	-0.0403574	-0.072934	-0.0678743	-0.00727073	0.0457501	-0.0308399	0.0673787	0.0548516	0.0163363	-0.0481916	-0.0619328	-0.0286533	0.0172678	0.0408919	0.00723427	0.0572761	0.028185	-0.000638087	-0.0299164	-0.0328035	0.00429251	0.0234358	-0.0754023	-0.011913	-0.151152	-0.0161124	0.0141149	0.101803	-0.00662273	0.0429781	0.000637805	-0.166829
NCOR1_O75376	0.0449717	0.0183156	0.0475957	-0.0110195	-0.00287	-0.0522693	0.0105844	-0.00752616	0.0277507	-0.0841611	0.0028643	-0.0310915	0.0274822	-0.0462953	-0.0335614	0.0367098	0.0050343	0.0503949	0.0227013	-0.0104378	-0.0550386	0.0515872	0.0374272	0.0241338	-0.00505193	-0.060195	0.0158265	-0.0763964	0.0269066	-0.0243994	-0.0227838	-0.0339004	-0.0667412	0.00888569	-0.000416388	0.0157844	-0.018692	-0.0247117	0.000416268	0.0119617	-0.021603	-0.0413219	0.00519818	0.0361032	0.0225552	0.00695727	-0.0379647	-0.0148942	-0.0958403
SEMA7A_O75326	-0.0542032	0.0686091	-0.177744	0.155065	-0.0167582	-0.0549926	0.041817	-0.00750859	0.0355438	-0.0223319	0.110929	-0.260472	0.0966812	0.00746971	-0.0577819	0.0758369	-0.0312406	-0.0401	-0.115091	0.00719387	0.0237925	0.0771274	0.0343667	0.0419427	-0.0572	-0.111083	-0.00771298	-0.00722993	0.017721	0.0583105	-0.0450615	0.0438041	-0.113073	-0.102013	-0.0743105	0.0273289	-0.00519034	0.0255141	0.191829	0.172492	-0.0198188	-0.012669	-0.113903	0.173915	0.0918115	-0.137842	0.0973011	0.00517174	-0.257623
GADD45GIP1_Q8TAE8	-0.0567163	-0.0247471	-0.0561872	0.150226	-0.0472385	0.0603355	0.000358918	-0.0298734	0.124887	-0.0379393	-0.0674274	0.0881742	0.060135	0.10185	-0.000359007	0.049104	-0.0447942	0.0285841	0.0205325	-0.00268484	-0.0189774	-0.0236721	-0.112009	-0.0134533	0.0316195	0.12976	-0.0468856	0.106621	0.00267985	0.0991544	0.00415403	-0.0208195	-0.0399921	-0.00301541	0.11626	0.0769775	0.0510743	0.00971958	0.0110459	-0.0897933	-0.0271789	-0.05037	0.00300913	0.12836	-0.00326223	0.0701972	-0.12065	-0.0665659	1.18297
DHX30_Q7L2E3-2	0.00649852	-0.00652793	-0.0192315	-0.0580658	0.0533663	-0.0230982	0.0493666	0.0555395	0.0476861	-0.081468	0.0446073	-0.0216209	0.0143163	-0.043793	0.0253005	-0.041497	-0.0276284	-0.0188905	0.0284184	0.0282173	0.035995	-0.00295938	0.0546031	-0.00433903	0.0247319	-0.0833741	-0.0591221	-0.0893211	0.00295332	0.0340376	0.00594537	-0.0206665	0.00153901	-0.0601131	0.074386	-0.00513577	-0.00154066	-0.0658007	0.0124629	-0.0109447	0.031251	-0.046277	0.0248418	-0.0210162	0.0492185	0.00288776	0.0100041	-0.0502743	-0.0712759
PM20D2_Q8IYS1	-0.0975913	0.0197499	-0.020024	-0.242479	-0.645602	-0.14457	0.266979	0.188697	0.129091	-0.203041	-0.0696292	0.0579169	0.159548	0.304369	0.211427	-0.335871																																	-0.134745
SPTLC1_O15269	0.0950417	-0.0553791	0.0512976	-0.042136	0.00697157	0.0341437	0.0120339	0.0225409	-0.0339636	-0.0301288	0.00327576	-0.0248594	0.0176343	-0.054862	-0.0394614	-0.00328322	0.106884	0.0352986	0.0890401	0.00830959	0.0358701	-0.0944145	-0.0275471	-0.0556534	0.0210289	-0.0773615	0.0176	-0.0134104	0.0459006	-0.103027	-0.00835773	-0.0586836	0.0667919	-0.0111105	0.0593122	-0.0763384	0.047333	-0.0508609	0.0623575	0.0084431	0.0622134	-0.0754209	0.0296372	-0.0291858	-0.0084928	-0.0491639	0.0172157	-0.024737	0.0428012
CKAP5_Q14008	0.102988	0.00120184	0.0539811	-0.048087	0.0356852	-0.00931476	-0.00082944	-0.0379092	0.0784973	-0.0683709	0.026567	-0.0447545	0.000828964	-0.0175169	0.0114595	-0.0594865	0.0595748	-0.0134774	0.0660515	-0.0368573	0.0036232	-0.0365336	0.0050424	0.0038047	-0.00894853	-0.0563886	-0.033263	-0.0728531	0.0572656	0.0393253	0.0198852	-0.00363233	0.018053	-0.035308	0.0507514	0.00090723	0.0216176	-0.0204201	0.0162435	-0.00564962	-0.000907801	-0.0476346	0.0135398	-0.0073016	0.0379081	-0.0103096	0.028594	-0.0185594	-0.00934027
TRAPPC11_Q7Z392	0.117533	-0.0594068	0.105264	0.0168986	0.0382262	-0.019474	0.0585295	-0.0117994	-0.0297416	-0.054633	0.0117037	-0.0743632	0.0811304	-0.0370696	0.0649629	-0.0272508	0.0102399	-0.028531	0.00879299	0.062538	-0.0440208	-0.128478	0.0159516	-0.134038	0.0824586	-0.0511539	0.0289508	0.00560048	-0.014385	-0.000768854	-0.036087	0.000768444	0.0131638	-0.0422965	0.0266119	0.0290368	-0.00411456	-0.0541968	0.0142384	0.00410285	0.0206603	-0.0758635	-0.0469604	-0.0211595	0.0373538	-0.0386572	0.0102468	-0.0487834	0.00619014
ACAD10_Q6JQN1-5																	0.00638379	-0.0318195	-0.118309	-0.0395877	0.0394103	0.0851463	0.300723	0.144855	0.156596	0.0577014	-0.00641216	-0.151291	-0.0402883	0.0743238	-0.00736198	-0.0300543	0.00508917	-0.000341906	-0.0838457	0.0237252	0.124058	-0.114428	0.0834161	-0.100767	0.0565381	-0.0266696	0.000341825	-0.0964923	0.0193446	-0.0573802	0.0590157	-0.12491	-0.170591
ALDH2_P05091	0.0263216	-0.0480739	0.0185341	-0.0428236	-0.00735428	0.00689934	-0.0117122	-0.0452478	-0.00236365	0.0363482	0.0491794	0.034108	0.0590646	-0.00171346	-0.00320933	0.00171143	-0.0188975	-0.130965	-0.0771308	-0.0764118	0.00899326	0.00532921	0.00249173	-0.0259818	-0.0169817	-0.00102876	0.0218109	0.00102803	0.041375	-0.0208794	0.084019	0.0330976	0.054174	-0.00819939	0.0272104	-0.0253008	0.0126492	-0.0728234	0.029032	-0.00569231	0.0176605	0.0108391	-0.0332589	-0.0696345	0.00566994	-0.0419365	0.0436501	-0.0149079	0.00983988
ALDH1B1_P30837	-0.0281347	-0.0255176	-0.0100879	-0.0330754	0.0230957	-0.00770257	0.0308608	-0.0737812	0.0162063	-0.114561	0.0588648	0.00356795	0.217188	0.0695112	0.020223	-0.0035768	-0.0187524	-0.0395728	-0.0190146	-0.0621161	-0.00963495	-0.0210497	0.00957103	-0.0581304	0.150578	0.0655651	0.0572504	0.0476115	0.0515913	-0.0144372	0.216111	0.119673	-0.00206331	-0.0181315	0.036997	0.0313307	0.113058	0.00206036	0.0579402	-0.0349441	-0.00815026	-0.0355174	0.0323637	-0.018174	0.102727	-0.00413775	0.0133499	-0.0226827	-0.0131652
ALDH1A2_O94788	-0.0425718	-0.00741772	-0.0757902	-0.0164643	-0.00430706	0.00707313	-0.0275222	0.00429424	0.118756	0.0388454	-0.00655621	0.0219677	-0.0156161	0.0311786	0.0502586	0.0887241	-0.0033545	0.00288429	-0.0186973	0.0451226	-0.0292994	-0.00177835	-0.0261908	0.00581822	0.0720088	0.117707	-0.00434657	0.00177616	-0.0127683	0.0299127	-0.00682857	0.0607715	-0.0691726	0.0655578	-0.0175217	0.0217258	-0.00224939	0.0952484	0.00224589	0.0408132	-0.06103	0.044051	-0.0501019	0.0337501	-0.0137411	-0.024342	-0.00477196	0.0479271	0.0620595
ALDH1A1_P00352	-0.101621	-0.048214	-0.0420082	0.0146363	-0.0902105	-0.0452773	-0.0349138	0.0477563	0.0487138	0.0742012	-0.00793352	0.0244454	0.00789014	-0.0716828	0.0682251	0.116608	-0.133876	-0.138394	-0.209833	-0.119113	0.0513048	0.0510056	0.0298475	0.0706491	-0.150006	-0.030478	-0.141174	-0.079859	0.0454974	0.0451253	0.0627547	0.0572312	-0.0441402	0.17185	-0.0515655	-0.028818	-0.0349909	-0.011561	0.192089	0.351059	0.269246	0.342263	-0.0557914	-0.0182647	-0.0328356	0.0114691	0.248655	0.270839	0.140715
ALDH1A3_P47895																																																	-0.397098
NSRP1_Q9H0G5	0.0359286	0.00790121	0.0341596	-0.0210797	-0.0163409	0.0157171	-0.0204238	-0.00794472	-0.0194125	-0.0498562	-0.0174996	-0.0250798	0.121493	0.038415	0.0376032	0.113028	-0.0782736	0.00149537	-0.128017	-0.0305418	0.0368978	0.155627	0.0916701	-0.00149692	-0.0563851	-0.0271522	-0.0577158	0.0137048	0.00417992	0.0303224	-0.050204	0.0511386	-0.1047	0.00249719	-0.0350756	-0.0113522	0.00327372	0.0374569	0.0252481	0.0918012	0.0178829	0.0479652	-0.00250152	0.0306174	-0.0196396	-0.00300581	-0.0312082	-0.0116664	-0.163206
STIP1_P31948-2	0.000559787	0.0299753	-0.0373073	-0.0112638	-0.000560004	0.013195	-0.0368981	0.00755788	0.0393862	0.0103504	-0.0113456	-0.0103388	-0.0275029	0.0586783	-0.00815249	0.00262321	-0.0423922	-0.0668995	-0.110076	-0.127301	0.115146	0.158692	0.0383086	0.131561	-0.130373	0.000108961	-0.0721887	-0.0342616	0.0787688	-0.000108969	0.0464223	0.0720953	-0.0556464	-0.0245887	0.026894	0.00816777	-0.0242704	0.0575927	-0.00278013	0.00137416	-0.0103493	0.0434131	-0.00495133	0.0194999	-0.00137547	0.051722	-0.00532127	0.0386946	-0.0338439
ST13_P50502	-0.0177982	-0.00274992	-0.0330005	0.00274469	-0.024684	0.00440511	-0.00573222	0.0638567	-0.0154932	0.0077937	-0.00544715	0.0128091	0.0232832	0.0180169	-0.0147209	0.0565806	0.00719886	-0.0680338	-0.0676902	-0.035497	-0.00723496	0.0690291	-0.0144108	0.0474079	-0.0433693	0.034622	-0.0203528	0.0237488	0.0257912	0.0211166	-0.0333525	0.016121	-0.0448666	-0.0143385	0.0240327	-0.00442091	-0.033896	0.0251334	0.00651414	-0.0200813	-0.0140401	0.0144534	-0.00653209	0.00856273	-0.00753431	0.0257413	0.01185	0.00440741	-0.0503235
ST13P4_Q8IZP2
TSC1_Q92574	0.210484	-0.0739728	0.091407	0.0988518	0.140423	-0.0418341	-0.121276	-0.0665969	-0.0136653	-0.110096	0.0281024	0.0968907	-0.0120649	-0.000407686	0.151272	0.000407571	-0.0602563	-0.012079	0.059247	0.179579	-0.0136794	0.237541	0.101878	-0.200737	0.162696	0.0119787	-0.0716405	-0.0580552	-0.0190036	0.0914901	-0.0913106	0.0233041	-0.00542349	-0.0399865	0.0854304	0.0442378	0.0714707	-0.0759233	0.0308388	-0.122315	0.00540318	-0.0112406	0.185797	0.167895	-0.0843297	0.0741704	-0.0966457	-0.0232819	-0.105527
NNT_Q13423	0.0642347	0.00460947	0.0387441	-0.0133484	-0.0251522	-0.0678241	0.0842518	0.0188556	-0.00660615	-0.00462425	0.0180991	-0.0299084	0.0193165	-0.0293071	0.0493716	-0.0252084	0.0357327	-0.0363193	0.000481967	0.00540742	0.0467143	0.0361053	0.0338774	-0.00734834	-0.000482128	-0.00672405	-0.426558	-0.463427	0.0695661	-0.00249753	0.0378277	-0.0258875	0.00998026	0.00899962	0.0195299	-0.0159517	0.0619265	0.015907	0.00153276	-0.0507804	0.00740038	-0.00153439	-0.0377287	-0.0416027	0.0333087	-0.00392499	-0.00904222	-0.0284761	-0.0754265
UBXN4_Q92575	0.0434675	0.0235051	0.00989857	-0.0585028	-0.0255564	-0.0600492	-0.00788776	-0.0867227	0.288049	-0.265005	0.061198	-0.174353	0.00784487	0.0405753	0.0221552	-0.0889947	0.099925	0.330205	0.448161	0.0297693	-0.158787	-0.260051	-0.0486351	-0.303521	0.375817	-0.00843158	0.320573	0.00838259	-0.0138114	-0.114198	0.109439	-0.10418	-0.0201724	0.00456616	-0.00458066	0.0419126	0.0138924	-0.0227485	-0.0214774	0.08163	0.0699493	0.0142889	-0.0495731	0.012465	-0.0166508	-0.11424	0.0141453	-0.0648406	-0.0326226
CCNDBP1_O95273	-0.248513	-0.00879928	0.0799549	0.0130379	0.00704581	-0.0889186	-0.0150393	0.019559	0.0802521	-0.123606	-0.0158168	-0.00708039	0.0154625	0.0431887	0.0269966	-0.090669	-0.0796013	-0.152269	-0.0962428	-0.0885709	0.177641	0.191695	0.166962	0.109602	-0.181551	-0.154216	-0.126457	0.00157692	0.148357	-0.00157864	0.141152	0.103007	0.0349857	-0.0201827	0.0835402	0.0589828	-0.00930023	-0.0278069	0.0434477	0.00843018	-0.00847973	-0.0262323	0.0912112	0.0340633	-0.0430893	0.0293311	-0.0608081	-0.0610756	-0.0303184
FAM89A_Q96GI7	-0.42193	-0.0677588	0.196868	0.419421	-0.0413146	0.111542	0.114221	-0.0373058	0.122702	0.102743	0.00764956	-0.121922	0.303313	-0.0951951	-0.00769034	-0.0353703	0.0156477	0.087187	-0.062606	-0.0158193	0.0824205	-0.0394482	0.022931	0.0482626	0.0469169	0.0673395	-0.0385153	-0.0307121	-0.0240725	0.0474887	-0.022909	-0.053302	-0.188099	0.136671	-0.128633	0.089803	-0.213183	0.0278391	-0.00502467	0.0762435	-0.0716877	0.0233065	0.163579	-0.0865468	-0.0214873	0.00843709	-0.0245892	0.00500724	-0.23797
BRD4_O60885	-0.00208819	0.0134723	-0.0112474	-0.00291355	0.0616425	-0.0322341	0.85592	0.880559	0.00563746	-0.0537196	-0.00344455	-0.0105395	0.04174	0.00208517	0.0358187	-0.0572415	0.0359212	0.00807663	-0.0359217	0.0236134	-0.00957814	-0.00354984	-0.0591419	-0.0602707	0.055387	0.0183685	0.0377186	0.000639398	-0.0298873	-0.000639682	0.00941758	-0.0161391	-0.0712345	-0.0551035	-0.0655565	0.0635936	0.023285	0.00330362	-0.0247778	-0.0260131	-0.033385	-0.0033112	0.0283839	0.0438246	0.374066	0.456013	-0.00806108	0.00929699	-0.194648
BRD3_Q15059	-0.157424	0.0421948	-0.141276	-0.0323986	0.0335904	-0.0249336	0.605822	0.655526	-0.0754324	0.0442546	-0.0820189	0.0155482	0.0695564	-0.0157175	-0.0393321	0.017262	0.0576082	0.0567375	0.125537	0.182759	-0.102489	-0.184329	-0.340195	-0.326532	0.177634	0.197587	0.244788	0.0496821	-0.246431	-0.0883243	-0.0673133	-0.0514542	-0.122286	-0.00637891	-0.0614354	0.0255215	0.193389	0.00635083	0.0820843	-0.0663955	-0.0103885	-0.0111721	0.0944976	0.0862607	0.578453	0.42131	-0.0222484	-0.0440553	-0.160629
BRD2_P25440-2	0.117958	-0.198685	-0.0600918	-0.0456144	-0.0676379	0.0920552	0.973524	1.14345	0.0251997	-0.288197	-0.0252101	0.0247771	0.140748	-0.0934012	-0.0989364	0.24749	-0.10916	-0.0694996	-0.213026	-0.159603	0.538017	0.695906	0.253825	0.00232385	0.00535844	-0.137926	-0.153623	-0.112394	0.0985863	0.0431884	0.123072	-0.00232759	0.00493356	-0.084667	-0.0756966	-0.0202281	0.000233852	-0.0147046	-0.00514725	-0.0891984	0.0353826	-0.0127299	0.106203	0.028812	0.554391	0.733538	-0.00023389	0.0160288	-0.437298
RPAP1_Q9BWH6	0.0246516	-0.0099819	0.0393394	-0.0143466	-0.00168783	-0.0531633	0.0330957	0.00306801	0.00357508	-0.0855081	0.0117028	0.00299687	0.000895464	-0.0138914	-0.0312759	-0.00089602	0.00234152	-0.00693189	0.0136371	-0.013888	-0.0144453	-0.0471807	0.00276162	-0.0537659	0.0185085	-0.00234532	0.0458068	-0.0498564	0.0252427	0.0316329	0.00236907	-0.00410855	-0.00283259	-0.0264029	-0.0337527	0.096779	0.0388447	0.00282704	0.0151592	0.0252393	0.0100138	-0.0638397	0.0234688	-0.00971794	-0.00826237	-0.0683249	0.00408886	-0.00763108	-0.0679186
TYK2_P29597																																																	-0.400458
EFNB1_P98172	0.133849	-0.0465283	0.121837	0.300428	-0.0597203	-0.042392	-0.017359	0.0229007	-0.0985824	-0.0865014	-0.0132377	0.0131173	0.101073	-0.0907589	0.059481	0.156917	-0.03395	0.151237	0.148912	0.24101	-0.103474	0.188763	0.141224	-0.0630149	-0.0150137	0.0336988	-0.0713629	0.00530693	-0.00532653	-0.143312	-0.0609167	0.0143433	-0.0575305	-0.0823031	-0.0159605	0.07548	0.0145852	0.0292252	-0.0101632	-0.0163586	0.0215303	-0.00944042	0.00937905	0.0528304	-0.0480046	-0.0140161	0.06474	0.056763	0.0734975
CTNND1_O60716-3	0.0502197	0.0590341	0.0732187	-0.00134757	-0.0189991	-0.0747554	0.0842103	-0.0135712	-0.00949678	-0.041117	0.0316927	-0.0264456	0.0108078	-0.0522565	0.00134631	0.0184736	0.0610914	0.0317345	0.0951025	-0.0152587	-0.00312042	-0.0614458	0.0376534	-0.0492159	0.0500176	-0.0419749	0.0147511	-0.0166428	0.00311368	0.0523163	-0.0278935	-0.0113822	0.0640319	0.00564725	0.0524479	-0.0348318	0.0326526	-0.0165445	0.0278839	-0.052296	0.0327363	-0.0211363	-0.0554813	-0.0238208	0.0716188	0.00129895	-0.00130012	-0.0707706	-0.000966885
NDFIP2_Q9NV92																	0.105602	-0.0928444	0.130611	0.329244	-0.093931	0.0327002	-0.0334586	0.118524	0.134897	0.0548015	-0.141552	-0.083332	-0.152668	-0.284139	0.213172	-0.0756617
RBM39_Q14498	0.119555	-0.047851	0.101788	-0.0716577	0.118533	-0.0694602	0.0393368	-0.0038088	0.00807923	-0.115102	-0.00997307	-0.193136	0.0132333	-0.0488066	0.0191903	0.00379877	0.182904	0.117772	0.17228	0.0734577	0.102671	-0.0157024	-0.0798332	-0.138516	0.0155333	-0.12272	-0.0976655	-0.0763592	0.115496	0.0683586	-0.168385	-0.184166	-0.0489401	-0.0976359	0.0138589	-0.0284751	0.0654786	-0.0253874	-0.00314809	-0.0067927	0.00314123	-0.0579516	0.128263	0.0338386	0.0710311	0.0661788	0.0307805	-0.0677274	0.0444689
RBM23_Q86U06-2	0.0890984	-0.390304	0.389883	0.0771845	0.181949	-0.288573	0.103546	-0.271326	-0.200103	-0.0276602	0.0441898	0.251754	-0.106176	-0.129068	-0.276172	0.0271398	-0.0858058	0.0627417	0.33583	-0.170749	-0.0106418	-0.0100245	0.00995533	0.0777035	0.0606519	-0.347259	0.347364	0.195675	-0.0335631	0.0303652	-0.0626763	-0.0490416	0.124464	-0.17821	-0.0553912	-0.0670026	0.196139	-0.212764	0.0978302	0.0303218	0.047844	-0.0559167	0.157367	0.204465	-0.0309728	0.0539064	-0.192665	-0.0511043	-0.714169
RBM4B_Q9BQ04
RBM4_Q9BWF3	-0.0424603	0.0195617	0.00990209	0.0361517	0.0176918	-0.0376154	-0.0346737	0.0659178	-0.00715413	-0.0326122	-0.0235499	0.0391711	-0.00090357	0.000903004	-0.031731	0.0444852	0.0370571	-0.059889	-0.0452134	-0.0932803	0.264103	0.423727	0.146271	0.219387	-0.0380341	-0.0500266	-0.0491418	-0.143936	0.146765	-0.160109	0.125429	0.194742	-0.0847412	0.00820758	0.031587	0.0291231	-0.00540448	-0.00101886	-0.0107852	-0.0160579	0.0560772	0.00758881	-0.143628	-0.0319124	-0.0245996	0.0845484	0.00101814	0.00813655	-0.0124252
RBM4_Q9BWF3-3
RBM14_Q96PK6	0.00753443	-0.0775935	0.089398	-0.12145	-0.0175018	-0.0232733	-0.0839942	-0.00757399	0.26514	-0.163926	0.0479855	0.0715803	0.176288	0.205726	-0.0748077	0.0206777	-0.0343495	-0.0621104	-0.0301185	0.217045	0.0102735	0.116786	-0.0436395	-0.0616773	-0.0344824	0.113336	0.135877	0.194143	0.0105473	0.0782548	-0.0103472	-0.0342474	-0.00602761	-0.126692	0.0147131	0.101752	-0.021176	0.0503535	-9.27176e-06	-0.00401793	-0.0446313	0.042797	-0.0445476	9.2717e-06	0.0578328	0.0747442	-0.0230025	0.00635566	-0.10016
RAB3GAP1_Q15042	0.070102	-0.00736195	0.04551	-0.0291148	0.0121483	-0.00533089	0.00531127	-0.032899	-0.0605939	-0.0510576	0.0247741	-0.0146315	0.0306799	0.0104044	0.0250861	-0.0226598	0.0455847	0.0115311	0.068395	-0.0410098	-0.0032439	-0.0647421	0.0669441	-0.0750335	-0.0227334	-0.153638	-0.0508348	-0.1029	0.0378272	0.0134286	0.01344	0.00323662	0.02142	-0.125675	0.013367	0.0395472	0.00116933	-0.024637	-0.0193557	0.0167501	-0.0309998	-0.0844374	-0.0750577	-0.0361919	0.0263302	0.0461819	0.000539366	-0.000539568	0.0720849
CHCHD3_Q9NX63	-0.0265767	0.0055682	-0.0242796	-0.051184	-0.0301067	0.0152238	0.0298545	0.0480408	-0.0468596	0.0446844	-0.0186183	0.00251611	-0.0378901	0.00773221	-0.00252051	0.00819027	0.00105323	-0.00886949	-0.0132882	-0.0362432	0.0442691	-0.0564981	0.026503	-0.001054	-0.0732616	-0.0584897	-0.00136285	0.00484308	0.0274365	0.00196195	0.025234	0.0287149	-0.0579322	0.00710787	0.0502232	-0.0039989	-0.0279954	-0.0354747	0.0388866	-0.016547	-0.0454673	0.0275732	-0.0983611	-0.0644702	0.0292216	0.00398784	0.0342725	0.0541081	0.187966
HDAC10_Q969S8	-0.322972	-0.0420411	0.0173245	0.00112457	-0.03616	-0.00112545	0.0533989	0.177043	0.0498023	0.0207689	-0.342137	-0.0594007	0.110195	-0.261903	-0.10244	0.0263749	0.0159053	-0.0359238	0.0192429	0.103362	0.000515294	-0.0520511	-0.000515478	-0.0843633	0.132664	-0.0918451	0.0853642	-0.0269751	-0.0828174	-0.0264394	0.0118931	0.0538854	0.0595307	0.0671865	0.0592002	0.227809	-0.0859344	0.0575131	-0.033401	-0.0703981	-0.17111	-0.0365787	0.106127	-0.133371	-0.102604	0.495652	0.0326451	-0.20899	-0.0593522
EEF1G_P26641-2	0.0886038	-0.0191091	0.0447181	-0.0446868	-0.00597863	-0.0144409	0.0168312	-0.0512674	0.118188	-0.0367934	0.0401749	-0.0271999	-0.0377144	0.00595396	0.0544041	0.0212848	0.0136912	-0.109763	-0.0728174	-0.123684	0.0394825	0.0208903	0.041943	0.0314302	-0.134888	-0.106066	-0.15437	-0.180117	0.0912907	0.0197779	0.041136	-0.0138223	0.0200783	-0.0922733	0.118474	-0.0510869	-0.0256549	-0.0294457	0.0278523	-0.067148	0.0718775	-0.037332	0.00566558	-0.0624858	0.0886114	0.10302	0.0451262	-0.00568792	0.0799304
CAST_P20810-6	-0.0253608	0.0221774	-0.0632817	-0.00615296	-0.00281387	0.02542	-0.0525489	0.0296833	0.0460503	0.0152583	-0.0323757	0.0028084	-0.0144777	0.0388264	-0.0316725	0.0178259	-0.0384347	0.0176555	-0.0330699	0.00123021	-0.0271412	0.0474957	-0.0211994	0.025108	-0.00123126	0.0195063	0.0151832	0.0418396	-0.083127	-0.0137274	-0.033967	0.030357	-0.120469	-0.000883638	-0.0698754	0.00958163	-0.0197504	0.0481722	-0.0330582	0.0301813	0.025768	0.0725654	-0.0455802	0.000883097	-0.0955868	0.0137757	-0.0610049	0.0205636	-0.159207
HVCN1_Q96D96	-0.00327231	-0.0613592	0.210256	-0.0665746	-0.00288914	0.0391034	0.154372	-0.116899	2.33136e-05	0.0258894	-0.0437788	0.105496	0.12456	0.0305533	-0.113962	-2.3314e-05	0.111554	0.223528	0.0524189	0.012774	-0.257856	-0.0128882	-0.434653	-0.219288	0.183664	0.27505	0.554665	0.169644	-0.45258	-0.0784659	-0.184551	-0.0745129																	0.238138
BEGAIN_A0A1B0GVM0																																																	-0.0451641
INPP5A_Q14642	-0.14367	-0.00630942	-0.152038	0.0820814	0.00628194	-0.184896	0.0356375	0.0499117	-0.270989	0.00813483	-0.0402035	-0.240345	0.034791	-0.0470644	0.0600555	0.057997	-0.0187256	0.139119	0.150048	0.079703	-0.0558877	-0.052562	-0.223561	-0.354163	0.159239	0.145645	0.239848	-0.190231	-0.0813705	0.0184857	0.140325	-0.197389	0.00106955	-0.0536662	0.193476	0.0639383	0.148791	-0.231617	0.230158	-0.00107035	0.20505	-0.0727364	-0.128145	-0.150892	-0.47024	0.0138923	0.154326	-0.154027	-0.137473
RFLNB_Q8N5W9	-0.0146729	0.228378	-0.0303285	-0.101069	-0.193077	0.00272957	-0.0386137	-0.0281136	0.322155	-0.158179	0.154294	0.0329725	-0.00273474	0.0589625	0.0317923	0.0733347	-0.185671	0.0309064	-0.132605	-0.0336796	0.00420236	0.0759137	0.109142	-0.00923338	0.0980154	0.0303906	-0.0845303	-0.026453	0.0128421	-0.00421464	0.0502099	-0.0207099	0.135861	0.213674	-0.103391	-0.183629	-0.179219	0.0865227	-0.0242016	-0.141557	0.0445177	0.0238023	-0.127195	0.368146	0.116805	-0.0872502	-0.232358	0.521289	-0.00586852
RRM2_P31350-2	-0.00269022	-0.020286	0.0337189	-0.0238099	-0.030702	0.0448259	-0.0488885	0.0924498	-0.012728	0.0330555	-0.00350706	-0.000771424	0.0833926	0.0917284	0.000771011	0.129048	-0.0717511	-0.0507911	-0.117891	-0.076983	0.0264417	-0.00621312	-0.0264273	0.0377644	-0.0254682	0.0876491	0.0938936	0.10399	0.00618647	0.0824726	-0.0183132	0.0492243	-0.0759714	-0.144848	0.00399717	0.0133684	-0.0162766	-0.00176865	-0.0154572	-0.00291348	-0.0407271	0.131058	-0.0341061	0.0960285	0.0684909	0.0696509	0.00176648	0.0421653	-0.220818
RRM2B_Q7LG56-6	-0.0888252	-0.0300474	-0.0455233	0.0113907	-0.0454403	0.0381169	-0.0338031	0.0271675	-0.012024	0.0187978	-0.0286014	0.0283093	0.0422041	0.0650344	0.0278829	-0.0114813	-0.0311517	-0.00310986	-0.0304021	0.0433162	0.019127	-0.00893307	-0.0221587	-0.0590759	0.0174213	0.0924344	0.0853686	0.0697258	-0.0829708	0.00310317	-0.0554595	0.0571873	-0.0487651	0.0226004	-0.000435966	0.0113405	-0.0733377	0.0710906	-0.0222404	-0.009447	0.019851	0.0618513	0.00422744	0.0716051	-0.0180977	0.000435834	-0.0185403	-0.0189784	-0.170868
DBN1_Q16643	-0.0437147	0.0604667	-0.0208063	-0.0214317	0.0032925	0.0191422	-0.00603497	0.0141267	-0.0352384	-9.23324e-06	-0.0122629	9.23318e-06	-0.0503444	0.0382337	0.00539594	0.0106389	-0.0320156	-0.0279737	-0.0560757	-0.0496682	0.0357341	-0.0214856	0.032621	0.00552702	0.0247145	-0.00366331	0.00661426	0.00365403	0.0178432	-0.0251899	0.0430453	-0.0068604	-0.0459042	0.07969	-0.0258277	-0.00590169	-0.0134728	0.0560738	-0.0542087	0.0239076	-0.0363139	0.0930351	0.00587765	0.102939	-0.039143	0.00771561	-0.00960327	0.0330598	0.164663
WIPF2_Q8TF74	-0.0400829	-0.0199227	-0.118963	0.0394348	-0.0386084	0.0196513	-0.0758052	0.0432387	-0.067036	-0.0544172	-0.0630014	0.0346325	0.0320021	0.0414758	0.0435386	0.0582308	-0.0184103	0.0406643	-0.0639535	0.0501929	-0.0997701	-0.0969475	-0.0975767	-0.0793907	0.0336841	0.06821	0.0202724	0.0368266	-0.130545	0.0234827	-0.0665262	0.0181783	-0.150713	-0.0319814	-0.00930985	-0.050708	0.0286151	0.0398511	0.0154458	0.0596402	0.00925016	0.044352	-0.0964751	-0.063974	-0.059222	0.0366568	-0.0378967	0.0274341	-0.264565
CASP8AP2_Q9UKL3	0.0875787	0.033227	0.133147	-0.0650037	0.0110871	-0.0439568	0.15559	-0.0283346	-0.0809	0.0804368	0.0938688	-0.0188552	-0.123246	0.027725	-0.011173	-0.118312	0.027441	0.0001918	0.0877352	-0.124436	0.0525718	-0.224246	-0.0169944	-0.0171143	-0.056764	0.0326805	0.0558635	-0.0307279	0.0833946	-0.000191826	0.0760752	-0.0340163																	-0.077086
COPB1_P53618	0.0234928	0.00984892	0.00658564	-0.0427154	-0.0188795	-0.0134597	0.0268198	-0.00584096	-0.095507	0.0347983	0.0158478	0.002522	0.0173687	-0.0451229	-0.00252641	-0.0241088	0.0305497	0.0237194	0.041234	0.0701356	-0.0552217	-0.165756	-0.0769937	-0.0821897	0.0632636	0.0607021	0.0614505	0.0244781	-0.049123	-0.0241159	-0.0438237	-0.0326092	-0.03974	-0.0172109	-0.00793409	0.00948174	0.0345588	0.0238632	-0.0231525	0.0204181	0.002376	0.0168896	0.0012558	-0.00751499	0.00422805	-0.0335601	-0.00125689	-0.0213001	0.039867
TEPSIN_A0A1B0GV70	0.233959	0.015796	-0.00295291	-0.0390519	-0.0113074	0.0583677	0.0779504	0.00294688	0.00429368	0.0632705	-0.0127536	-0.0207748	0.0372161	-0.0555531	-0.041601	-0.0493527	0.0149123	-0.0448256	0.0717045	0.0101593	0.0810269	-0.161077	-0.0163906	0.0536975	-0.0675897	0.0642834	0.0317266	-0.114641	-0.0464262	-0.0102314	-0.074424	0.055009	0.211166	0.253017	-0.0102478	0.000813613	0.179635	0.229095	-0.000814072	-0.258964	-0.082683	0.0667658	-0.039349	-0.185579	-0.172808	0.0206592	0.0681611	-0.16464	-0.275573
URGCP_Q8TCY9	-0.0600282	-0.0794836	-0.00136123	-0.0452359	0.0289096	-0.0781724	0.0699682	0.00135994	-0.332234	0.0573389	-0.077777	0.05759	0.164645	-0.157722	0.0584783	0.104346																	0.031365	-0.24236	-0.181614	-0.108409	0.162622	0.153266	-0.0157772	0.0156065	-0.507225	0.10008	-0.0448435	0.0345287	-0.135537	0.230109	-0.053299	0.0690153
BTAF1_O14981	0.0743238	0.012646	0.0634196	-0.00638562	-0.0368749	-0.0491804	-0.000200347	0.000200319	0.00671736	-0.118985	0.039937	-0.0452427	0.0567602	-0.0299159	-0.0338048	0.00235602	0.0727066	0.0697544	0.121129	0.0644043	-0.0826372	-0.193924	-0.143648	-0.13004	0.0749076	0.026781	0.0124474	-0.0197511	-0.00910351	-0.0304708	-0.011613	0.00904643	-0.049078	-0.0364379	-0.0282852	0.0434715	0.0338925	-0.0115828	-0.00757725	0.0237014	-0.0303814	-0.0260139	0.00248475	-0.00248904	0.0530429	0.0266002	0.0270748	0.0197297	-0.0572547
TTC4_O95801	0.0451627	-0.0481065	0.0726946	-0.0798713	0.0852305	-0.0355035	0.0377409	-0.043805	0.0481283	-0.0508086	0.0138126	-0.00313759	0.00313078	-0.0394125	0.0101469	-0.00538587	0.0612358	-0.0013509	0.0343562	0.0167288	-0.0618105	-0.116963	-0.0647735	-0.0535432	0.00520696	-0.0584544	0.040029	0.0307693	0.0218996	-0.0469695	0.00134964	-0.0245457	-0.00434414	-0.0196391	0.0384079	-0.0147769	0.0283191	-0.0302304	0.0641137	0.00104015	0.0454795	0.00542184	0.0358923	-0.0293614	0.0727481	-0.00717757	-0.0010409	-0.0641042	-0.000831968
FBXL8_Q96CD0	-0.0170706	-0.102922	-0.0406558	-0.145376	-0.0325819	0.0479179	0.0337578	-0.0619251	-0.131422	-0.136661	0.0168709	0.0324869	0.251021	0.101399	0.0735524	0.0177858	0.0263434	-0.0710267	0.0723903	-0.0298068	0.055583	-0.0849229	-0.0483877	-0.037917	0.0766451	-0.0874376	0.0977906	0.131224	-0.0584206	0.0561555	0.102673	-0.0268334	0.0600749	-0.115511	0.0294803	-0.0858907	0.0416234	-0.0728863	0.0476912	0.0106102	0.0457916	-0.162874	-0.0493456	0.179024	-0.0265619	-0.0106888	0.037246	-0.1258	-0.340456
RAB3GAP2_Q9H2M9	0.0910099	0.008167	0.0839148	-0.0235389	0.00625046	-0.0392659	0.0217211	-0.024761	-0.0333709	-0.0857926	0.0386724	-0.0458707	0.0336512	-0.00280429	0.00279885	-0.040072	0.0174702	-0.0127887	0.0538699	-0.0376999	0.0180489	0.0343991	0.0469846	-0.00965954	-0.0330333	-0.134328	-0.0329861	-0.112121	0.0362045	0.0155728	0.0095953	-0.0151762	0.0330843	-0.0502792	0.065235	0.0221857	-0.0128131	-0.0205209	0.0233233	0.000892441	-0.0666837	-0.0339458	-0.02373	-0.00406563	0.0516337	0.0302725	0.0392887	-0.000892994	-0.0635151
BAG4_O95429	-0.0421065	-0.022099	-0.0149791	0.110316	-0.206478	-0.140546	0.0118001	0.029404	0.00719125	-0.0118164	-0.0290341	0.037067	0.0330656	0.0855949	-0.00722728	0.170528	-0.0766499	-0.0202063	-0.069449	0.0777761	-0.0554691	-0.0183568	-0.0702586	-0.0421975	0.143368	0.0612094	0.127054	0.0765553	-0.0388261	0.0454316	0.0181262	0.0627553	-0.084757	-0.0331153	-0.0492906	0.0792229	-0.0204263	0.105714	-0.0192906	0.0543649	0.021026	0.0321747	0.0595396	-0.0134745	-0.0163669	0.0759424	0.00212985	-0.002133	-0.137272
OTULIN_Q96BN8	-0.00995838	-0.0267982	0.0246941	-0.0294072	0.0216922	0.0193882	0.055777	-0.00138276	-0.0736882	-0.023506	-0.0395915	0.0361532	0.0439649	-0.0700086	0.00138144	0.0272729	0.0676618	-0.0042229	0.0356746	0.0443938	-0.0236222	-0.00262803	-0.00282469	-0.0355989	0.0838389	-0.0313116	-0.0399892	0.00262325	-0.0210822	0.0283817	0.0128606	0.0297373	-0.0107771	-0.0610816	0.0993442	-0.038225	0.0379358	-0.0884472	0.0353603	-0.0276077	0.243432	-0.0155825	0.0131638	-0.0581575	0.041077	0.17402	0.00208722	-0.00209025	-0.0798036
PPP2R1A_P30153	-0.0305671	-0.0243132	0.0427765	-0.0247331	-0.000833829	0.000833348	0.0476326	-0.0194156	0.0313077	0.00747598	0.0193671	-0.0376267	-0.00701201	-0.0279151	0.0274191	0.0108648	-0.00847139	-0.0582405	-0.0413628	-0.0210397	0.0563463	0.0460109	0.0336648	0.01749	-0.0360169	-0.0156938	-0.0555612	-0.0549479	0.0499254	0.0273954	0.00842194	0.0287116	0.00125733	-0.0207788	0.0260021	0.0139009	0.0131562	-0.0123211	0.0145699	-0.00125843	-0.0122513	-0.0357675	-0.0401448	-0.0523069	0.0214837	-0.00944707	0.0076182	0.0236948	0.039528
PPP2R1B_P30154-2	0.00553405	0.00134378	0.0566548	-0.0187273	0.0255308	-0.0214772	-0.00134504	-0.0637383	0.0490807	-0.0589109	0.0357128	-0.0176377	0.028274	-0.0748973	0.0242604	-0.00253552	-0.00888868	-0.0686436	-0.0146635	-0.0288075	0.0691822	0.103685	0.0356802	0.0123497	-0.0652792	-0.0839009	-0.104323	-0.0894451	0.0295646	0.0225499	0.0275384	0.00883425	-0.00752733	0.00252877	0.0499802	0.0253452	0.0251731	-0.0411	0.035751	-0.0205748	0.0267119	-0.0368415	-0.00253321	-0.0286535	0.0333643	-0.0111264	0.0253565	-0.0135292	-0.0647115
IRF2BP2_Q7Z5L9	-0.00904283	0.0089865	-0.0663002	0.0211265	-0.0173498	-0.0301543	-0.0544553	0.0189985	0.132267	-0.0610367	0.043305	-0.0739788	-0.0101964	0.0567364	0.0146737	0.0254297	-0.0666958	-0.00408682	-0.0349191	-0.0139343	0.00891188	0.0277375	0.00407527	-0.0455045	0.102	0.0325001	0.075668	0.0288883	-0.00871856	-0.0100975	-0.0207735	0.00473399	-0.112525	-0.0128768	-0.0672487	0.00744513	-0.0554465	0.00174779	-0.0122755	0.0994243	-0.0205122	0.0555521	0.0447772	0.0648496	-0.0260719	0.0724979	-0.00174991	0.0129964	-0.237558
IRF2BPL_Q9H1B7	-0.0668108	-0.0064721	0.000193149	0.0473778	0.0316039	0.0167033	-0.0323543	-0.0811996	0.112632	-0.143363	-0.0323425	-0.0352506	0.0767315	0.0337749	0.105031	-0.000193174	0.0667639	0.0795748	0.0561653	0.0948203	-0.108253	-0.281781	-0.188447	-0.243301	0.141571	0.079647	0.0897991	0.0510522	-0.174486	-0.09382	-0.0997745	-0.0529252	-0.0311034	0.05636	-0.122845	0.00480483	0.0262165	-0.0135699	-0.00482089	0.0552918	-0.00546861	-0.0806539	0.0476576	0.0480313	0.0211304	0.0718845	-0.0301086	-0.0052457	0.483079
IRF2BP1_Q8IU81	0.104389	-0.0873594	0.0637183	-0.0693964	0.100104	-0.0844411	0.0553146	-0.0809635	-0.170705	-0.0300595	0.014801	0.0276361	0.0224051	-0.118309	-0.0149544	0.0212306	0.067868	0.0145354	0.103655	-0.0180975	0.0637469	0.0100106	0.0124384	-0.0210519	0.0032378	-0.124128	0.0727059	-0.063748	-0.00806821	-0.0827037	-0.00324509	-0.0545759	0.0203162	-0.0829551	0.0626878	0.000598401	-0.0630591	-0.10866	0.0286088	-0.0283174	-0.0913056	-0.0719311	0.0743393	0.108333	0.0344422	-0.00059865	0.00115531	-0.054239	-0.133391
TIMELESS_Q9UNS1	0.047449	0.00147347	0.0325579	0.0452747	-0.02867	-0.00480985	0.022923	-0.00147497	-0.081187	-0.0836493	0.0475379	-0.0515042	0.00671886	-0.0333379	-0.0611509	0.0827033	0.0590777	0.0280719	0.0520924	0.0112648	-0.0658158	-0.122783	0.0352751	-0.119456	-0.00489401	-0.135389	-0.104579	-0.136199	0.016895	0.0231819	0.00487747	-0.0391857	0.00320227	0.0425228	-0.00606126	0.0158998	-0.00320939	-0.0540035	0.05117	0.0194162	-0.074869	-0.089622	-0.0501985	-0.0268111	0.0159862	0.00778782	0.00491411	-0.0180722	-0.0903203
ARAP1_Q96P48	0.0593683	0.0155923	0.0367197	-0.00975634	-0.028383	-0.0638285	0.00389354	-0.0207672	0.0439267	-0.0768347	0.0694029	-0.0262668	0.0475779	-0.00390408	-0.0620294	0.0414799	0.0600941	0.0326834	0.0444909	0.0238488	-0.0290187	-0.12221	0.0382387	-0.0984351	0.0846754	-0.0544541	0.0268516	0.0016076	-0.0016094	-0.0276984	-0.00791239	-0.0463649	-0.0111275	-0.0692466	0.0252188	0.000325342	0.0410643	-0.0446965	-0.00192481	-0.000325416	0.00293003	-0.0758601	0.0284803	0.00535134	0.0459973	-0.0199323	0.0107731	-0.0302862	-0.0689812
AFF1_P51825-2	0.0872394	0.149423	-0.106205	0.172141	-0.0374963	-0.0892646	0.13059	0.135803	-0.116069	0.0354185	-0.0363099	-0.10027	0.0652368	-0.283269	-0.0646434	0.336527	0.266086	0.584015	0.557067	0.834586	-0.123327	-0.490862	-0.386408	-0.406034	-0.0206343	0.269981	0.498611	0.184149	-0.255432	0.0203433	-0.192688	-0.122262	0.0651418	0.138367	-0.061488	-0.0250717	-0.0197818	0.15396	-0.0459068	0.0165884	0.106776	0.0114304	0.000561888	0.00677429	-0.0662455	-0.106949	-0.0928267	-0.000562107	-0.24937
GPATCH8_Q9UKJ3	0.144872	0.00562602	0.124091	-0.0355226	0.0808984	0.0231123	-0.00946614	0.0112141	-0.00564805	-0.0436707	-0.0709759	-0.0297046	0.0329338	-0.0641343	-0.059493	0.140982	0.023478	-0.0154429	0.0768912	0.000188737	-0.000188762	0.0388039	-0.061332	-0.00374859	0.0570108	-0.0101668	0.0574582	-0.0125314	-0.107082	0.0687131	-0.0605783	0.00657732	-0.0110569	-0.0328784	-0.0140051	-0.0146764	-0.0340303	0.0109728	0.0653737	0.0199408	-0.0113066	-0.030679	0.177752	0.0507247	0.0578976	0.0966758	0.0439249	-0.0593796	-0.369431
CDC25B_P30305	-0.0289125	0.0132993	-0.0363273	0.00827056	-0.0156835	0.0114182	-0.0628044	0.018935	0.015508	-0.0809024	-0.0508219	-0.00831825	0.0167816	0.045518	-0.0281806	0.0322113	-0.0319837	0.0249839	-0.10552	0.0375955	-0.0493754	0.122008	0.0177394	-0.0260657	0.102553	-0.0179603	-0.0784003	-0.0514856	0.0820507	-0.0439428	0.0769577	0.0213832	-0.0182362	0.0928917	-0.0490054	0.110684	-0.0270929	-0.00972068	-0.0724331	-0.0617287	0.0571942	0.00965562	0.020074	0.0182698	0.0206114	0.0266183	-0.0538267	-0.033354	-0.259335
CDC25A_P30304																																	0.030942	-0.0014113	0.0348077	0.0127399	0.0502029	-0.0783593	-0.0101688	-0.0328754	0.018817	-0.0881238	0.0966952	-0.0258875	0.00140992	-0.129434	0.114403	-0.0902358
PDHA1_P08559-4	0.0652732	-0.0488348	0.10289	-0.0250485	0.0171558	-0.0558896	0.0527162	-0.0256445	-0.00365859	-0.0409831	0.0426899	-0.0397333	0.043173	-0.0715451	0.0450162	0.00364933	0.0322085	-0.092376	-0.0109757	-0.0945593	0.195132	0.194297	0.196448	0.0688109	-0.0221895	-0.179783	-0.0647428	-0.141548	0.111381	-0.00489141	0.100392	0.00487488	0.0468269	-0.00461387	0.0644067	0.0110617	0.106864	0.059948	-0.0709724	-0.0604989	-0.0191333	-0.00264827	-0.0165952	0.00264342	0.0355245	0.0343721	-0.0532559	-0.0998471	0.153623
CPSF1_Q10570	0.00381696	-0.000443952	0.0139327	0.000443816	0.00149229	-0.0735727	0.0163811	-0.014765	0.00387446	-0.0235463	-0.0235252	-0.0501059	0.0219946	-0.0937392	-0.0104616	0.0298535	0.0190438	0.0500998	0.001308	0.0521651	-0.0300793	-0.120813	-0.0424057	-0.0500749	0.0654809	0.00112599	0.070079	-0.00710926	-0.00924506	0.0152863	-0.00112687	-0.0287732	-0.0187132	0.0155932	5.53403e-05	0.00442053	0.0161611	-0.0240914	0.0553541	0.0274494	-0.0233506	-5.53425e-05	-0.0146567	-0.0181597	0.0115454	-0.0404491	0.0078211	-0.0177091	-0.0234385
TEX30_Q5JUR7	0.102986	-0.0512917	-0.0305953	0.249451	-0.150952	-0.0937029	0.239025	-0.106522	0.0103996	0.121	0.116467	-0.0239653	-0.0104752	-0.137297	0.32736	0.0131466	0.0032124	0.067884	-0.00321957	0.140885	-0.206918	-0.395671	-0.4615	-0.573236	0.110756	0.0652836	0.207545	-0.194111	-0.1093	0.0331864	-0.0692086	0.0280169	0.0962969	0.0602136	-0.00150088	-0.00654371	0.105288	0.0989994	0.00149932	-0.0236872	-0.0788885	-0.139928	0.125855	0.0145192	-0.0596798	-0.140811	-0.0560308	0.0884542	0.146657
NAP1L4_Q99733-2	-0.00712193	0.0585821	-0.0174886	-0.0465862	0.0786488	-0.0114327	0.0478796	-0.0116909	0.119749	-0.0331112	0.0313819	-0.000109622	0.000109613	0.0723457	0.0138158	-0.0602196	0.00998786	-0.0264359	-0.0760797	-0.0203354	0.0251394	0.0787985	0.026205	0.0690552	-0.0274116	-0.0149156	-0.0593741	-0.0218809	0.010366	0.050011	-0.0100575	0.0371476	-0.084371	-0.00133796	-0.00551101	0.000478777	0.00479328	-0.0282104	0.00603479	0.0150679	-0.000478935	0.0115901	-0.00121323	0.00753697	-0.00996105	0.015093	-0.0136256	0.00618646	0.0403838
NAP1L4_C9JZI7																																	-0.0129973	0.101253	0.112951	-0.0120836	0.211616	0.121677	0.107954	0.0461215	-0.390509	-0.12081	0.00977031	0.028459	-0.0394821	-0.0822447	-0.00983693	-0.120856
NAP1L4_C9J6D1
NAP1L1_P55209	-0.111849	-0.0224793	-0.118529	-0.0856829	0.128373	0.0457272	0.0221344	-0.0504945	0.0822702	-0.0528206	-0.0483949	-0.0314323	0.0514623	0.0228573	0.0543491	0.0418064	-0.0584341	0.00626184	-0.0372315	0.0253241	0.134473	0.302326	0.146367	0.171361	-0.00655667	-0.0558918	-0.0427105	-0.0396172	0.00783371	-0.0435911	0.0123898	-0.00628914	-0.0499993	-0.0364605	-0.0180177	0.0268969	-0.016096	0.0173539	-0.0305579	0.0248199	0.0522298	0.00285985	0.020892	0.0153662	-0.00986313	0.0240798	-0.0173542	-0.00286553	0.373492
NAP1L1_P55209-3	-0.00954854	-0.038845	0.0716527	0.138933	0.0424241	-0.0570106	0.136238	0.0608003	-0.75336	0.2659	-0.0951648	0.234994	0.00948576	-0.223312	-0.169847	-0.153357	0.133095	0.244379	0.0726741	0.22229	-0.315768	-0.712537	-0.40126	-0.658335	0.0746908	0.124856	0.220321	0.175104	-0.297482	-0.0765301	-0.201749	-0.204033	-0.16453	0.287615	-0.524028	0.081094	-0.0329935	0.17907	0.0035878	0.0796918	-0.00359674	-0.0490002	-0.0507286	0.179786	0.0711109	-0.318313	-0.146627	0.193093	-0.15743
NAP1L1_H0YHC3
SLC39A11_Q8N1S5	0.0724849	-0.0340507	-0.0782951	-0.173116	0.0572507	0.105019	-0.0212892	-0.0609479	-0.00182763	0.0453756	0.00832933	-0.151015	0.00182532	0.0425811	-0.161229	0.0307138	-0.0377767	0.0085628	-0.0170078	0.0437546	-0.0488827	-0.036257	-0.0456367	-0.147544	0.163086	0.130758	0.101916	0.0983364	-0.00861393	0.0804149	-0.0898153	0.0501176	0.196802	0.00865179	-0.290117	0.0446983	0.00233033	-0.00653942	-0.0485328	-0.168213	-0.0023341	-0.182259	-0.0744448	-0.148094	0.265241	0.107623	0.165324	0.155479	-0.260963
MED17_Q9NVC6	0.0133685	-0.00857052	0.0335773	-0.0254865	0.033856	0.00307205	0.0446875	-0.0030786	0.00746767	-0.0164918	-0.00685696	-0.0273044	0.0372178	-0.0200162	-0.0274615	0.0643223	-0.00348205	-0.0364849	0.0453051	0.0229108	0.00108527	-0.0741587	-0.062121	-0.0548703	0.0119161	0.0132409	0.00985467	-0.083346	0.0404085	-0.00108609	0.0792371	-0.0804465	0.00360445	-0.0284464	-0.0314594	0.00329238	0.00301696	-0.0121568	0.025148	-0.00599748	-0.00302328	-0.062904	0.00940684	-0.0475085	0.0250373	0.0160233	0.0697831	-0.0315629	-0.0710154
C11orf54_Q9H0W9	-0.0087462	0.0283012	-0.0433232	-0.0305303	-0.0455344	0.0136067	-0.0177446	-0.0148564	-0.0441424	0.0554199	0.0308568	0.0186014	0.0151074	0.0153726	-0.0225875	0.0086935	-0.0232484	-0.00173274	-0.0170909	0.0426737	0.0173269	-0.0138727	-0.0469264	0.0490882	0.00180451	0.0297652	0.0230502	-0.00131411	-0.0329973	0.00131291	-0.0160532	0.00894955	-0.098762	0.0562601	-0.101915	0.00283909	0.0306284	0.0798691	0.033936	-0.00284469	-0.0403691	0.0638265	-0.0426519	0.0119556	-0.036698	-0.0113613	-0.0112193	0.0309631	0.198891
MARCKSL1_P49006	-0.0263765	0.0151419	-0.0398362	0.0232167	-0.0367416	-0.00590448	-0.0801817	0.0391664	0.172193	0.0115294	-0.0214212	0.0210321	-0.053237	0.109705	-0.0362026	0.00588041	-0.167142	-0.173097	-0.28935	-0.225432	0.125573	0.238022	0.160577	0.186112	-0.251542	-0.0986103	-0.183804	-0.103291	0.116805	0.13808	0.109552	0.0922992	-0.125191	-0.165141	0.0812	-0.0298763	-0.033375	0.024621	-0.048357	-0.0814802	0.0332249	0.0886279	-0.122528	0.0185573	0.0311829	0.124665	-0.0187991	0.0577861	-0.15679
MARCKS_P29966	-0.059585	-0.00470528	0.00468998	-0.0296739	-0.125001	0.0695675	-0.0724897	0.0760304	0.358369	-0.0695487	0.0679251	0.0202072	-0.0312981	0.1202	-0.0308047	0.0468221	0.0296718	0.0248697	-0.0931277	0.0496667	-0.0982255	-0.121628	-0.0616188	-0.037737	0.00487046	0.0217241	-0.0195079	0.0534434	-0.0308213	0.114911	-0.00488696	0.0865807	0.0194218	-0.0300081	-0.00504304	0.0086138	0.00223274	0.152177	0.0583923	0.0186313	-0.0403846	0.105758	-0.0703577	-0.0700019	-0.0022362	0.0995092	-0.005064	-0.0498219	-0.0664337
SND1_Q7KZF4	0.0965053	0.00447396	0.0685346	-0.0261184	0.000236913	-0.0245046	0.0574331	-0.01514	-0.0077796	-0.047746	0.0622165	-0.000236952	0.0183074	-0.0342689	0.0352005	-0.010974	0.0216677	-0.0262949	0.0396601	-0.0574866	0.0845173	0.0305596	0.129134	0.0255608	-0.0219981	-0.133019	-0.0747455	-0.140544	0.105978	-0.0230195	0.0727563	-0.0544685	0.0554347	0.00134122	0.0797679	-0.00288189	0.0378329	-0.020879	0.0299507	-0.00134247	-0.0234822	-0.0335069	-0.00168956	-0.0364127	0.0633496	0.0101638	0.0521121	-0.0213106	0.0128296
BCR_P11274	0.00296386	0.00716909	-0.00296997	-0.0382241	0.0373631	-0.100853	-0.0219129	0.0320448	0.0771496	-0.0393646	0.0454993	-0.0646852	0.0129153	-0.0733624	0.0252272	-0.0764753	0.11737	0.097412	0.14055	0.0591943	-0.117317	-0.10758	-0.0250948	-0.10357	0.03037	-0.0885537	0.01642	-0.0416603	-0.016609	0.0700465	-0.0452045	0.0319097	0.0826972	-0.0711912	0.0197787	-0.0554241	-0.0411565	-0.0566454	0.0308153	0.0175207	0.0736177	0.0119573	0.0215249	-0.0309889	-0.0120572	0.025595	-0.0340871	-0.0291919	-0.102892
DHRS11_Q6UWP2	-0.0711116	0.0131799	0.000984096	-0.000984768	0.0306212	-0.00190557	0.0262495	-0.00179246	-0.0189924	-0.0829769	0.0592038	-0.0712036	0.0657762	-0.073982	0.024707	0.0321642	0.0264713	0.0159392	-0.0263086	-0.0140671	0.0313907	-0.0922322	-0.0354922	-0.0354	0.0139313	0.0352835	0.041083	-0.0547069	0.0534524	-0.0257405	0.0218599	-0.0234376	0.0708983	-0.0262886	0.0758415	-0.0149322	0.0522689	-0.00455702	0.00454267	0.0218974	0.00535601	-0.0422386	0.0767818	-0.0140147	0.0913366	-0.0655434	-0.00774056	-0.0506956	0.194808
ITPRID2_P28290	0.146795	0.0122041	0.0491835	-0.151818	0.142063	-0.0815279	0.0271229	0.126355	-0.0762512	-0.0123082	0.0792834	-0.0177452	-0.135901	-0.176031	0.0428781	-0.109159	-0.108703	-0.0129486	-0.0815291	0.100116	0.127415	0.133199	0.225645	0.0128334	-0.0904616	-0.0464113	-0.245208	-0.0340282	0.0568346	0.120903	0.0226121	-0.119352																	-0.337151
TADA3_O75528	-0.0284957	-0.021713	0.0264791	-0.0223913	0.0400309	-0.0227118	0.00986674	-0.00993469	-0.13116	0.030113	-0.017557	-0.0631506	0.0660262	0.0205126	0.0134241	0.0505262	0.00882782	0.0184947	0.149222	0.0246643	-0.0325679	-0.21158	-0.126974	-0.0527591	-0.0107582	0.0231442	0.157518	0.128536	-0.104825	-0.0918283	0.0104454	-0.00888217	0.0245794	0.0329423	0.0162862	0.0209246	-0.0148213	0.0117722	-0.033243	0.00021649	-0.0116995	-0.0154149	0.0700459	0.0500447	-0.000216523	-0.0297236	-0.00456075	-0.00503449	-0.115265
MIOS_Q9NXC5	0.0224945	0.0441482	0.0290969	-0.00240436	0.00509902	-0.0279897	-0.0305979	-0.00649045	-0.0522231	-0.00100027	0.0357457	-0.00456628	0.023566	-0.0353107	0.00099958	0.0575022	0.0114747	0.0437879	0.0209767	0.0883149	-0.014341	-0.0149143	0.000510829	-0.030287	0.0720816	-0.00051101	0.0452618	0.000603059	-0.0722335	-0.00272093	-0.00912965	-0.0375131	-0.0401907	-0.0182018	-0.0165629	0.0484437	0.0212472	0.00177156	-0.0155996	0.016945	-0.010788	0.0357007	-0.0623465	0.00398152	0.000697588	-0.029232	-0.000697926	0.0236703	-0.0787327
SNX13_Q9Y5W8	0.226327	0.0277806	0.0277443	0.176833	-0.00317873	-0.231119	-0.0937049	-0.110415	-0.29351	0.0464271	-0.00306053	0.00305405	0.07063	0.0879706	-0.0774036	-0.0345873																	-0.240582	0.0871512	-0.04802	-0.074543	0.0121765	-0.144233	0.0552289	-0.114924	0.0892527	0.0430427	-0.00786466	0.251315	0.0642219	0.00475962	-0.00477537	-0.0374978
VCL_P18206	-0.0225159	0.0057056	-0.0326123	-0.00572825	0.00969255	0.024258	-0.0150423	0.0279472	-0.0548314	0.0585506	-0.0277506	0.0229519	-0.0246493	0.0262477	-0.0134333	0.0253564	0.00334406	0.0326071	-0.00335183	0.0303638	-0.067541	-0.146849	-0.119397	-0.069415	0.0243442	0.0746825	0.0357661	0.0480388	-0.0699578	-0.0187006	-0.0497391	0.00385306	-0.0349428	0.0523694	-0.0156934	0.00874045	-0.00835242	0.060394	-0.0098139	0.0333676	-0.018317	0.0336338	0.00830434	0.0362706	-0.045813	-0.0178915	-0.0306982	0.024435	0.0807647
EXOC8_Q8IYI6	0.0520021	0.0454337	0.0443097	0.0221392	-0.0152907	-0.0527961	0.0632342	-0.0367343	-0.072349	-0.0398127	0.0357929	0.00794541	0.056332	-0.106124	-0.00798941	-0.0186312	0.0112102	-0.0172091	0.0284454	-0.0441532	0.0529128	-0.00315195	0.00828515	-0.0252759	-0.010992	-0.135173	-0.0951054	-0.1735	0.0710358	0.00314508	0.0395014	0.0105663	-0.00467454	0.0548299	0.00493232	-0.0199265	0.0136394	-0.0926181	0.00788935	0.00851617	-0.00380693	-0.0835306	0.0127617	-0.0137627	0.00379691	-0.0457696	0.0155799	-0.0442481	-0.0505831
NDUFV2_P19404	-0.282207	-0.0708329	0.098203	0.111327	-0.058721	-0.0140564	0.0406393	-0.147434	0.000611652	0.00186634	-0.000611911	-0.070147	-0.0903501	0.0296633	0.0741325	0.0341019	-0.0138718	0.0570465	0.00867565	0.0131974	-0.0821377	-0.00212785	0.0133022	0.0443631	0.000451866	-0.0619885	-0.0258971	-0.000452007	-0.0470461	0.00941846	0.00375435	-0.0445865	-0.0587725	0.0145072	-0.00167187	0.0579681	-0.0155796	0.00166993	-0.0268411	0.00437588	0.0281609	0.0168028	0.0109235	-0.00645769	-0.0256536	0.00729874	-0.0253493	-0.00798095	-0.167505
IDH3B_O43837	0.0498021	-0.0504366	0.0607837	0.001076	-0.0437092	-0.0373518	0.0123579	-0.0199092	-0.0798627	0.0425112	0.0440534	-0.0302226	0.0112146	-0.0073804	0.0152314	-0.0010768	0.0373357	-0.000169785	0.0390228	-0.0471716	0.0475029	-0.0998944	-0.0597755	-0.102196	0.00648423	0.000169765	0.0385034	-0.0342274	0.0169412	-0.14031	0.00181096	-0.0459525	-0.00258243	-0.0496236	0.0428095	-0.00467813	0.00192284	-0.00953889	0.0415016	-0.0264934	-0.00192541	0.00731756	0.0163144	-0.0217934	0.057387	0.0166798	0.0249332	-0.0423051	0.00255361
INTS1_Q8N201	0.0150377	0.0114782	0.0489185	-0.0694805	0.0242293	-0.046547	0.00915059	0.120381	-0.252829	-0.0745033	0.00125666	-0.0360695	0.074437	-0.108639	-0.00125775	-0.205571	-0.00184792	-0.0665351	0.0603274	0.00184556	0.0483485	0.0707466	0.108968	-0.00802172	0.00443248	-0.0861196	-0.110678	-0.16218	0.019481	-0.0110294	0.0476615	-0.029722	0.0599438	-0.0101936	0.0499479	0.00616825	-0.0472819	-0.0326389	0.00284601	-0.00285164	-0.0543265	-0.119028	0.0664796	-0.0574802	0.0219188	0.0159847	0.140939	-0.0656882	-0.0635958
TLNRD1_Q9H1K6	0.161057	0.0809363	0.158256	-0.721361	-0.227499	-0.577153	0.0405909	0.0202879	-1.43253	0.0370239	-0.0847148	-0.899564	0.100303	-0.466511	0.382867	-0.0205772																	-0.0639654	0.15247	-0.00973972	0.102045	0.242742	-0.177982	-0.283762	0.520927	-0.0567201	-0.00278161	-0.112003	0.238494	0.174137	0.0720003	0.00277626	-0.366019
COPG2_Q9UBF2	0.0502857	0.00909699	0.0201913	-0.00155782	-0.0159361	-0.0435206	0.00739833	0.0201913	-0.0393571	-0.0245213	0.00152612	0.0130566	-0.0109845	-0.0391884	0.0193361	-0.00152774	0.0145301	-0.0204533	0.0136762	-0.0111534	0.0499608	0.00834215	-0.0047655	0.027115	-0.00767932	-0.0177967	0.00109075	-0.0316791	0.038986	0.00484658	-0.00109157	-0.0183515	-0.0328209	0.00498942	-0.0158811	0.0241967	0.00820194	0.0218169	0.0259348	-0.00991685	-0.0474106	-0.0291292	0.00961723	-0.00500674	0.0148207	-0.00572838	0.00640096	-0.0195297	-0.00880346
COPG1_Q9Y678	-0.00673897	0.0141866	0.0111598	0.00289827	-0.00364666	-0.00640046	-0.0244964	0.0168878	-0.0595281	-0.000180037	0.0209198	-0.00997736	0.010161	-0.0202466	0.0131807	0.000180014	0.0268913	0.0143455	0.0268663	-0.004444	0.0196602	-0.0476722	-0.0141725	0.00759298	0.0119372	0.0019432	-0.0179324	-0.0154131	0.0175914	-0.0164492	-0.00194582	-0.0136435	0.00721526	0.0103512	0.0157833	0.00138415	-0.00476469	0.016379	-0.0273703	-0.0183285	-0.0186792	-0.00149868	0.00974379	-0.00121915	0.00121812	-0.0226641	0.0276692	-0.0219726	0.00799815
NAGLU_P54802	-0.0749591	-0.0303802	-0.00817108	-0.0214076	0.00436174	-0.0557035	0.064669	0.102841	0.0654805	-0.00332896	0.0226097	-0.0286567	0.0401213	-0.0842402	0.00332129	0.0961801	-0.0549512	-0.110186	-0.0407051	0.0166014	-0.0169796	0.0662496	0.0418098	-0.0153421	0.0390501	-0.0378385	-0.027824	0.0308544	0.00900344	-0.00905999	0.0623537	0.0563712	-0.00975497	0.0513562	-0.100339	-0.0586191	0.023551	-0.0286508	0.0083861	0.110789	0.108234	-0.0168614	0.116999	-0.000222077	-0.0125243	0.000222043	0.022194	-0.00638213	-0.242592
FMNL2_Q96PY5-3																																	-0.406896	-0.0581886	-0.0665213	0.00967475	-0.00974007	-0.160271	-0.0712132	0.150574	0.163246	0.0391934	0.134591	-0.0469637	0.0635954	0.113544	-0.0952146	0.236737
FMNL3_Q8IVF7	-0.282048	-0.0172871	0.0373178	0.0307144	0.0220869	0.187223	0.0791568	-0.201622	-0.0979851	-0.202964	0.0202219	0.0166528	-0.0678661	-0.0360411	-0.0168473	0.0932697
PDHX_O00330	0.0160925	-0.0133358	0.018277	0.00703636	-0.0507587	-0.00103871	0.0018595	-0.000243724	0.0157201	-0.0176063	-0.041286	-0.0684895	0.0492209	-0.0208533	0.000243683	0.0103772	0.0415217	-0.0599532	-0.0373538	-0.053749	0.0557773	0.0210422	-0.0110959	0.0110112	-0.0846994	-0.0284089	-0.0531258	-0.0406954	0.054074	0.0522817	0.049809	0.0164797	-0.00381305	-0.000594945	0.000594699	0.00138417	-0.0196538	0.0186738	0.0161108	-0.018907	-0.014236	-0.0511391	0.0183797	-0.00891284	0.00717198	0.0179417	-0.00366714	0.00366706	-0.0207806
MTHFD2_P13995	0.0349261	0.0029798	0.00865472	-0.10347	0.0614006	-0.0204915	0.0335345	-0.0783767	0.0435907	-0.00504495	-0.00614397	-0.0472143	0.014113	-0.00298597	0.0350118	-0.107047	0.129834	0.00538177	0.0744316	0.0354039	-0.00412511	0.0176583	-0.0370409	-0.0466273	0.00677322	-0.0650604	-0.0388098	-0.0836439	0.0155646	-0.0720649	0.00411335	-0.0778745	0.0447532	-0.0146094	0.0049376	0.035165	0.0374938	-0.0489073	0.0072375	-0.0240215	-0.00495456	-0.0452515	-0.0120568	-0.0795819	0.0498649	0.0158548	0.0467603	-0.0344248	0.189486
MTHFD2L_Q9H903	0.292563	0.00311351	0.386897	-0.00312024	-0.00666493	-0.341417	-0.212967	-0.0136472	-0.14893	-0.21591	0.1501	0.362491	0.42684	0.190746	0.103523	-0.0157769	0.135083	-0.20301	-0.15338	-0.0797598	-0.00299256	-0.263773	0.0664418	-0.260634	0.00298637	0.00709077	-0.0916827	0.288954	0.246321	0.100752	0.0505995	-0.125227
PCYT1A_P49585	-0.0195624	0.000915628	-0.0409049	0.0101592	-0.0562762	-0.000916209	-0.00488779	0.0784538	0.0432918	0.0138566	0.00676009	-0.019207	-0.00467483	0.0163337	-0.0161638	0.119988	0.0117494	-0.0333758	-0.0402393	0.00378214	0.0573295	0.0425808	-0.00379208	0.0631402	-0.0322948	0.0437295	-0.0476124	-0.0328163	-0.00584533	0.0726443	-0.00418306	0.0533063	-0.0902108	-0.000860805	-0.0351938	-0.00257933	0.0108188	-0.0313172	0.0305027	-0.0171744	-0.0137114	0.093692	0.0244204	0.0645098	0.0157542	-0.0133388	0.000860292	0.0479055	-0.142639
PCYT1B_Q9Y5K3	0.000241775	0.0625806	0.0590091	-0.0349386	-0.000241816	0.00781689	0.044129	0.0212036	-0.265397	0.0115884	-0.0270284	-0.0338462	-0.0241244	0.0120451	-0.0353701	-0.067408	0.133205	0.27179	0.247307	0.230646	-0.0426611	-0.146288	0.00280742	-0.09023	0.160052	-0.0334885	0.198655	0.186999	-0.121147	-0.0242115	-0.00281289	-0.0118572	-0.00127896	0.00875093	0.00763277	-0.0592243	-0.0189879	0.00489124	0.00127783	0.0229103	0.0023732	-0.00324649	0.0758683	0.0952927	-0.039766	-0.0207356	-0.0303943	-0.029251	0.0834801
USP34_Q70CQ2	0.0405434	0.0302812	0.0511473	0.0438682	-0.0139922	-0.00266233	0.00265742	-0.0316801	-0.0334663	-0.0489049	0.0105753	-0.0258367	0.0443559	-0.0489169	0.00946644	-0.00546156	2.65293e-05	-0.0139398	-0.0137674	0.0503132	0.0534266	-2.65298e-05	0.0854429	-0.024758	-0.0384106	-0.119229	-0.109592	-0.13374	0.0754481	0.0703225	0.0295887	0.0394361	0.0371784	0.0274649	0.0339711	0.0122906	0.0259906	-0.0172932	0.0394675	0.0116249	-0.027845	-0.0567094	-0.0044951	-0.0241151	-0.000291854	-0.00750195	0.000291795	-0.0637641	-0.109209
NRBF2_Q96F24	-0.0647399	0.0173375	0.000377896	0.0431562	-0.0360913	0.00728736	-0.0853473	0.0116919	-0.0227312	0.00579392	-0.0487584	-0.000377995	-0.0867532	0.0193985	-0.0520163	0.0257863	-0.0567414	0.0131209	0.01503	-0.0285821	-0.0132413	-0.0330974	0.0239221	0.042823	-0.0158168	-0.0293864	0.0914886	0.0732251	-0.0277265	0.0442338	-0.0365856	0.0653045	-0.0424133	-0.0541903	0.0800248	0.0278591	-0.0151836	0.0177726	0.0150254	-0.030243	0.0165276	0.0591607	-0.0389633	0.0305027	-0.0535712	0.0404896	-0.0424586	-0.0192189	-0.182675
PFKL_P17858-2	0.0370454	0.0372255	0.00568393	0.00500244	0.00143549	-0.0305225	0.00278076	0.0225286	-0.0590915	-0.00406477	-0.0135392	-0.00817239	-0.00143692	-0.0504337	0.0373314	-0.0261956	0.0513784	0.0440207	0.0214487	0.0148858	0.0113731	0.0854621	-0.0213596	-0.0370054	-0.0359697	-0.0652304	0.0502362	-0.00538744	0.0053674	-0.0148099	-0.0105064	-0.0385735	0.0224024	0.0353833	-0.0225046	0.00134199	-0.0804431	-0.119165	-0.00134324	0.0173493	-0.0184613	0.00538121	0.0654281	0.00689991	-0.0025442	-0.0264462	0.0100404	-0.0506096	-0.0197527
PFKP_Q01813	-0.00355697	0.0208819	0.0508662	-0.0147685	-0.00395531	-0.0231026	0.0289868	0.0116753	0.0125983	-0.00332775	0.0107355	-0.0311759	0.00332009	-0.0134506	0.00794255	-0.00902747	-0.00564018	-0.0276468	0.00233801	-0.0262371	0.067214	0.0365714	0.0403275	0.0253282	-0.0482091	-0.0172513	-0.0214511	-0.0474045	0.0560747	-0.00234181	0.012351	0.0259681	-0.00189534	0.0246222	0.00635892	0.011618	-0.0396745	-3.23386e-05	-0.00342268	0.0198137	0.0047344	0.0188884	-0.0217114	-0.0101227	-0.0262301	-0.0367121	3.23379e-05	0.0138732	-0.0903819
PFKM_P08237-3	-0.00891623	0.0189009	-0.0204331	0.011264	-0.031755	-0.0324649	-0.00368335	0.0463458	-0.0280723	-0.00813206	0.00372918	0.0358395	0.0329682	-0.00795347	0.0274188	0.00367397	0.00841784	0.0214879	0.0218128	0.0232297	-0.00846725	-0.0735324	-0.0211737	-0.0401338	0.0171983	0.0408915	0.0210197	-0.00856701	-0.0358266	0.0161997	-0.0357249	-0.0115933	-0.0151013	-0.000324081	0.011693	0.0379404	-0.0178424	-0.0736999	-0.00660554	0.0341027	-0.00129791	0.0248923	-0.0523077	0.000324008	0.00790872	0.0058911	-0.00542206	0.0293783	-0.0638583
C8orf33_Q9H7E9-2	0.00638979	0.0388934	-0.0270995	0.00866461	-0.0741824	0.00043085	-0.000430979	0.0169493	-0.0321549	-0.0551582	-0.0853161	-0.0122148	0.0127412	-0.0128848	0.0143463	0.0571615	-0.0961814	-0.0976094	-0.0408301	-0.0526997	0.0324125	0.155918	0.0113178	0.00824079	-0.00160044	0.0391003	-0.0489621	-0.113698	-0.0778222	0.0703141	0.00159867	0.0252782	-0.0578733	-0.0635686	-0.0390734	-0.0577609	-0.0106628	0.228339	2.64292e-05	0.164383	0.172087	-2.64297e-05	0.25538	0.0037057	-0.0573088	0.0708667	-0.0496458	0.0631024	-0.29251
CSE1L_P55060	0.036156	-0.00402478	0.0134698	-0.0231764	0.00907132	-0.021912	0.0642636	0.00401358	-0.0584881	0.0145679	0.0359559	0.00926831	-0.0140389	-0.051063	-0.00416349	-0.0338062	0.0251316	0.00439973	0.00822577	0.00171983	0.0141091	-0.077946	-0.0241512	-0.0524417	-0.00172188	-0.0204288	-0.0539078	-0.0922755	0.0392304	0.0163149	0.0147116	-0.010937	0.0277311	0.019665	0.0350393	-0.0292929	-0.00808168	-0.00193308	0.0267833	0.00193049	-0.0316497	-0.0695843	0.0048168	-0.00943149	0.0327358	-0.0339135	0.0193671	-0.0163511	0.028893
PURA_Q00577	-0.0309971	0.0956003	-0.144365	0.0103425	-0.0251073	0.0218221	0.0217286	0.0358795	-0.0212309	0.0196989	-0.0180167	-0.0260362	-0.0104172	0.0193287	-0.0801666	0.0465755	-0.0432514	-0.0865528	-0.11612	-0.0311355	0.146727	0.340756	0.220452	0.191134	-0.0167005	-0.0121714	-0.132958	-0.180951	0.0341535	0.088572	0.077778	0.0120696	-0.0388703	0.0114321	0.105186	0.0196075	-0.0114557	0.0632086	0.0394018	-0.00775779	0.0412554	0.0146821	-0.0306516	0.000640263	-0.000640547	-0.0200679	-0.079491	-0.0401914	-0.0678558
PURB_Q96QR8	-0.0238068	0.085393	-0.0160842	0.00355493	0.0894536	0.0241378	-0.0619588	-0.0877296	0.248019	-0.0825096	-0.00480624	-0.00356371	0.123563	0.0992127	0.0468252	-0.00776008	0.00990628	0.0398081	0.0508961	0.0362128	-0.0375326	0.0515733	-0.074583	0.0340318	-0.00310065	0.0226123	-0.0614694	-0.0269944	-0.102983	-0.0440167	0.003094	-0.0116173	-0.0161264	0.0446939	0.0138326	0.055212	0.0340759	0.00231621	-0.0141536	0.028431	0.0420939	0.0212655	-0.102813	-0.0303784	-0.0285915	-0.00231993	-0.0500518	-0.014474	0.00528989
PAXX_Q9BUH6	-0.104548	-0.0138071	-0.0525712	-0.0350133	-0.0289626	-0.000666825	-0.0205818	0.0253328	0.00317965	0.000666517	0.0166718	0.035422	0.0448521	0.00564007	-0.0540506	0.05752	-0.0138561	0.0233037	-0.00812805	-0.0263832	-0.00850457	-0.00202223	-0.0565478	0.0230035	0.0242925	0.0689414	0.0176879	0.0514408	-0.0207061	-0.00075468	0.000754285	0.0400706	0.0494504	0.00205401	-0.00356653	-0.0210859	-0.00946722	0.0423545	-0.0169742	-0.00106452	0.0457815	0.0398256	-0.0787551	0.031525	0.00106374	-0.053945	-0.081645	0.00952718	-0.10102
KIF20A_O95235	0.241363	0.0614888	-0.0140901	0.0230888	-0.170222	-0.268149	0.0139538	-0.36219	0.0315427	-0.478317	0.200953	-0.014496	0.0827942	-0.477178	-0.178061	0.145025	-0.0481295	-0.0715067	0.110226	0.12199	-0.0563129	-0.0037085	-0.0654105	0.00369899	0.134715	0.162076	0.172154	0.0448794	-0.0165483	0.103822	-0.00645989	-0.0178386	-0.00460728	-0.115658	0.0095298	-0.0212475	0.0290751	-0.013232	-0.0227719	0.0508475	-0.0484854	-0.0773412	0.0420622	0.0651408	0.061854	-0.0416602	0.00459261	0.0228956	-0.0492619
RECQL4_O94761	0.0235402	0.135143	0.0391578	0.16154	0.0477082	-0.112235	0.0831194	-0.106925	-0.122354	-0.0760223	-0.0956004	-0.0667128	0.0535739	-0.0491631	-0.0239307	0.0562126	0.139819	-0.0269096	0.27662	0.0146222	-0.499823	-0.00810819	-0.0225638	-0.0558768	-0.216185	0.163388	-0.550524	-0.393965	0.158537	0.149752	0.00806287	0.0761981	-0.158492	-0.026659	-0.219898	0.182483	0.00469146	0.117325	0.106305	-0.0198631	-0.0437617	0.0302468	-0.100435	0.0602091	-0.00470676	-0.016963	0.110766	0.0403304	-0.265914
HDLBP_A0A024R4E5	0.0247987	0.00371693	0.0160995	-0.0498012	0.0244952	-0.0579823	0.0347845	-0.0608774	-0.00372653	-0.0934357	0.0146749	-0.0624162	0.00987116	-0.0569154	0.00985972	-0.0778511	0.0348632	0.0247828	0.0416832	-0.0155288	0.00193501	-0.0371229	0.0153635	-0.011824	0.0185237	-0.0350206	-0.00107741	-0.0594363	0.0208145	-0.00556392	0.00107661	-0.00904173	0.0318478	-0.00639094	0.0289492	0.00198217	0.0157361	-0.0214336	0.0156518	-0.020494	-0.00927705	-0.0668288	0.00706672	0.00053207	-0.000532266	-0.0350903	0.0185294	-0.0272277	-0.0702835
ANKRD30A_Q9BXX3	0.225466	-0.00793265	0.118932	0.055203	0.0739597	-0.0187244	-0.0423208	-0.0602011	0.300618	-0.163338	0.110661	-0.0405847	-0.0888109	0.00788927	0.0429823	-0.0626384	-0.0217464	0.0148439	-0.162155	1.99789	-0.249958	0.773607	-0.0535747	-0.257333	0.526613	1.25621	1.35081	1.8322	0.143631	-0.0149982	-0.266465	-0.0294049	-0.0162623	-0.0340476	0.00217132	-0.0360903	0.0438454	-0.119296	0.0733791	0.0705734	0.0168181	-0.00413004	0.0596944	-0.02635	-0.0583623	-0.00217459	0.0275681	0.0479227	-0.278527
ANKRD30B_Q9BXX2	0.0583402	-0.0806751	0.0743563	0.0196664	-0.0935217	-0.043451	0.156762	0.0663126	-0.390595	0.0644557	0.00702587	0.00240003	-0.119267	-0.0760727	-0.00240403	-0.124368	0.212295	0.230442	0.485857	0.307619	-0.491608	-1.01917	-0.635941	-0.479746	0.257072	0.30416	0.361669	0.313073	-0.482927	-0.33083	-0.364133	-0.249016	0.175881	0.242253	-0.00988655	-0.0206186	0.0475737	0.126201	0.0705963	0.00981926	-0.0389632	-0.0836816	0.393862	0.173321	-0.0789071	-0.171819	-0.024649	-0.102621	0.0393471
NEK7_Q8TDX7	0.128464	-0.0344824	0.0415584	-0.0374769	0.0350707	-0.0717	-0.0147211	-0.0496488	0.0145724	-0.0662082	0.0858183	-0.0657458	0.095073	-0.0356102	0.0621092	0.0196616	0.160932	0.0159396	0.124884	0.175257	-0.132006	-0.127748	-0.0201666	-0.104504	0.105867	-0.02394	0.00357994	-0.0664467	-0.000173448	0.0531403	0.000173427	-0.111065	0.0107259	-0.0836605	0.0850532	0.250535	0.00215942	-0.0533467	0.0169856	0.00838501	-0.00461736	-0.055359	-0.0333673	0.00790441	0.00786762	-0.159215	-0.00216266	-0.093595	-0.00772475
LCP1_P13796	-0.040095	0.0135638	-0.0727987	-0.0266344	0.0108738	0.0351777	-0.018031	-0.00892748	0.0347536	0.0579827	-0.0380911	0.00122303	-0.00122407	0.0654307	-0.0173293	0.00604729	-0.031593	0.0251392	-0.0378895	0.0245805	-0.00596833	0.0639702	-0.0852593	0.0220839	0.00594374	0.0769801	0.00870261	0.0503355	-0.0788899	-0.0654438	-0.0804136	-0.0261496	-0.070146	0.0268379	-0.0275398	-0.001984	-0.026172	0.027169	-0.0453541	0.0211062	0.0133978	-0.0101708	0.0102212	0.0179716	-0.0438979	0.0356523	-0.0481611	0.00198128	0.121259
PLS1_Q14651	-0.0340555	0.00266599	-0.0574501	-0.014415	-0.037692	0.0285859	-0.0202342	0.00409949	0.0488428	-0.0524738	0.00542128	-8.53378e-05	0.0534284	0.040675	8.53328e-05	-0.000929763	0.00943553	0.00219283	-0.0357414	0.00211453	0.0816073	-0.0361812	0.0112926	0.0292178	-0.0258387	-0.00211764	-0.00507715	-0.0406104	-0.00577861	-0.0261839	0.00475594	0.0258938	-0.0489669	0.0141491	-0.0156292	0.0312832	-0.000489031	0.045747	-0.0111225	0.0401525	0.0302469	-0.0377938	0.00532937	-0.00640975	-0.0370411	0.000488865	-0.0249713	0.0184409	0.0111313
PLS3_P13797	-0.0412555	-0.0264282	-0.00770381	-0.0072193	-0.0711805	-0.0299397	-0.0257887	0.0383675	-0.0490983	0.113371	0.0156945	0.0197165	0.0141854	0.00718335	0.0283293	0.0132029	-0.00568762	0.0253608	0.0510722	0.113356	-0.1314	-0.185568	-0.142873	-0.159658	0.140913	0.153281	0.111517	0.0825599	-0.135831	0.00566529	-0.140097	-0.0573311	-7.99519e-05	0.0878115	-0.0383516	7.99474e-05	0.00617302	0.0663134	-0.0206783	0.0106817	-0.0414391	0.0771552	0.0118613	0.0908371	-0.0404998	-0.0431621	-0.0151808	-0.0263998	0.543502
TANK_Q92844	0.000214641	-0.0123438	-0.000214673	0.0150941	-0.0252841	-0.0352753	-0.112354	-0.0637389	0.0714701	-0.0258557	-0.00549523	0.0112079	0.0768046	0.00346863	0.0595772	0.0251451	-0.12983	-0.240668	-0.184627	-0.139005	0.152324	0.208029	0.0289747	0.0138133	-0.083991	-0.0243787	0.18086	0.101059	-0.0139468	-0.0350934	0.0747426	0.0574971	-0.0871601	0.00675571	0.0515621	0.123788	-0.0259443	-0.02671	-0.0241993	0.0445883	0.145495	-0.0067875	0.0804009	0.0564464	-0.0963969	-0.061772	0.0434831	-0.00805175	-0.419757
GLOD4_Q9HC38-2	0.0670266	-0.00626669	0.0262562	-0.0025965	-0.00211372	-0.00740288	0.0459989	0.00343124	-0.00528954	0.0745347	0.00189542	0.01029	-0.00716998	0.00530254	-0.00189792	-0.0166982	-0.00430492	-0.00489538	-0.0364267	0.00509589	-0.000257238	0.0530151	0.0390793	0.00337923	-0.0161275	-0.0188154	-0.0376725	-0.0331746	0.017129	0.012643	0.0130633	0.000257192	0.0273276	-0.00690918	-0.00434094	0.00452428	-0.0298552	0.0290273	-0.00220423	-0.00368566	-0.000307068	0.00863483	0.000307003	-0.0140376	0.0106443	-0.00203018	0.0304892	0.0259217	0.363377
POP1_Q99575	-0.109291	0.00477475	-0.0654008	0.0240144	-0.0634505	-0.00112665	-0.0891741	0.0154454	0.00342989	-0.0036114	0.0039243	-0.02673	-0.0318213	0.00112577	0.0122875	0.0783306	-0.0838267	-0.0420972	-0.064423	-0.0061039	0.0254296	0.0953958	0.00224377	0.0622209	-0.038991	0.0769116	-0.0200065	0.0317988	-0.00224726	0.0132095	-0.0300747	0.0188843	-0.0840161	0.0128451	-0.0572676	0.0257048	-0.0313476	0.0243204	-0.0342745	0.0332561	-0.024456	0.0148591	0.0526423	0.063447	-0.0520118	0.0292471	-0.0129605	-0.020819	-0.0520464
AGK_Q53H12	0.00933423	0.0620299	-0.0196582	-0.0170062	0.00297539	0.0310853	0.0195328	0.0439632	0.0761663	-0.0764907	0.0210547	-0.051142	-0.045507	-0.0131548	-0.00298153	-0.0159561	-0.0182966	0.0121543	-0.0488503	0.0110627	0.0269802	0.154696	0.000508624	0.0800336	-0.15818	-0.108387	-0.128364	-0.0691589	-0.000508804	0.0463546	-0.0468208	0.049187	0.00344959	-0.00345786	0.0237805	-0.00752456	-0.0120075	-0.0119075	0.0150237	-0.0260337	-0.0103799	-0.0268021	0.0942322	0.0399429	0.00800642	0.0559729	0.0267322	-0.00849429	-0.117495
UBE3A_Q05086	0.00906176	0.00356299	0.00457018	0.0357305	-0.0424565	-0.00357181	-0.0119925	0.0262851	-0.0496991	-0.018177	-0.020189	-0.011086	0.00617379	-0.0138074	0.0106169	0.0234224	0.0368965	0.0197273	0.0143034	0.0401543	-0.0457864	-0.130831	-0.0745378	-0.0789324	0.0199639	0.0247366	0.00472533	-0.00474086	-0.0438453	-0.0148682	-0.0126449	0.0277664	0.02572	0.0237502	0.000552183	0.0217027	0.00903541	0.0236821	-0.00298822	-0.00335106	-0.0394945	-0.0130334	0.00976396	0.0061979	-0.000552395	-0.0339853	-0.00744336	-0.0142579	-0.0543166
DAGLB_Q8NCG7	0.0619803	-0.0856126	0.00982732	-0.0412691	0.066113	-0.0447672	0.0394078	0.0588237	-0.0856983	0.023347	-0.017939	-0.00989472	0.0645919	-0.0316857	-0.0581174	0.0284333	-0.00408969	-0.12798	-0.082555	-0.000564082	-0.012539	0.0718797	0.0350683	-0.0534912	0.106953	0.0773359	-0.0520198	-0.0913798	0.0275566	0.000563862	0.0111612	0.0477834	0.0385827	-0.00529767	-0.00941288	0.080906	-0.0599689	-0.0403378	-0.0371367	-0.0427593	-0.113037	0.0271402	0.00527829	-0.0272374	0.0129545	0.0927104	0.0461959	0.025659	-0.199285
NUMA1_Q14980	0.0368243	-0.0405472	0.0201907	0.00948995	-0.0231134	-0.0190487	0.00833741	0.0314141	-0.00723846	-0.0534661	-0.004177	-0.0340635	0.0138919	-0.00258852	0.00258388	0.0391465	0.0214067	-0.00799788	0.058005	0.0036673	-0.00590639	0.0242081	0.0396725	0.00790324	-0.0118965	-0.0157636	-0.0126537	-0.0352348	0.0131733	0.0913861	-0.00445272	-0.00367665	-0.00116247	-0.0180881	0.0719213	0.03975	0.0547982	-0.0136806	-0.0189071	0.0337731	-0.0228494	0.010184	0.000658239	0.0401747	0.0527462	-0.0140118	-0.0187222	-0.00065854	-0.109445
EXOC5_O00471	0.17117	-0.0199135	0.0871487	0.000216753	0.0681352	-0.0334584	0.0664977	-0.0702125	0.0101386	-0.0764141	0.0537459	-0.066472	-0.000216786	-0.129329	0.0155897	-0.0460076	0.0228135	-0.0027526	0.0518952	-0.0467946	0.0695192	0.0659129	0.107471	0.00274735	-0.0640267	-0.16569	-0.181365	-0.221759	0.077623	-0.0080927	0.0255846	-0.0173521	0.0242519	-0.0600377	0.0602819	0.0340937	0.0224117	-0.075635	0.0658556	0.0212919	-0.0216108	-0.104136	-0.0423565	-0.0978369	0.0264702	-0.0719725	0.053827	-0.0483653	0.0198494
GCN1_Q92616	0.131043	-0.0169512	0.117503	0.00386812	0.00293141	-0.0565163	0.055487	-0.0487259	-0.0525919	-0.0456296	0.110296	-0.00293738	0.0364801	-0.129475	0.0436779	-0.010751	0.0859766	0.00972081	0.116872	-0.0107928	0.00795304	-0.107015	0.0631429	-0.0671642	-0.00799712	-0.132193	-0.0906921	-0.151048	0.100214	0.0258535	0.0897187	-0.017222	0.0621313	-0.0374289	0.114515	0.0182517	0.0752083	-0.0591216	0.0497528	-0.0192125	-0.0140224	-0.127957	0.0138875	-0.0608146	0.0930987	-0.022133	0.0521733	-0.0719405	-0.0138361
MTMR4_Q9NYA4																	0.00772222	-0.0256088	0.1747	0.0521454	-0.0014859	-0.0784067	0.0311052	-0.187665	0.00148437	-0.0211111	0.051948	-0.00273376	-0.0806222	0.0178918	-0.0315298	0.0970481	0.0545869	-0.113406	0.0823207	-0.0474572	-0.0002851	0.0206389	-0.0304212	-0.212136	-0.0344488	-0.0672188	0.00599244	-0.0330792	0.118536	0.103377	0.011748	0.000285044
MTMR3_Q13615	0.0204986	0.026345	0.0416927	-0.0186179	-0.00797121	0.0259804	-0.0138445	0.00792741	0.0174333	-0.0310272	-0.0166502	0.013304	0.0606511	-0.0364442	-0.0275587	-0.0335785	-0.000144119	0.0298071	0.0551289	0.0194139	-0.0322127	-0.0453157	-0.0282428	-0.0454037	0.0186993	-0.0847966	0.0320707	0.000144105	-0.109853	-0.0103985	0.03461	0.0780187	-0.0557788	-0.0031393	0.0114854	0.130436	-0.0625292	0.00313248	0.0153005	0.0242843	-0.0703012	0.106021	-0.0127356	-0.00524599	-0.0283051	-0.0386558	0.0108746	0.0286152	-0.0986104
ADCK5_Q3MIX3																																	-0.211562	-0.0121632	0.186417	-0.271234	-0.154359	0.158715	0.103363	0.177785	-0.249803	-0.0553713	0.241607	0.0120615	0.0963944	0.327953	-0.175632	-0.0562411	-0.0697421
PACSIN2_Q9UNF0	0.0608425	0.0503094	0.108316	-0.065844	-4.51019e-05	-0.0127691	0.074758	4.51005e-05	-0.0324098	0.0283111	0.021179	-0.0381883	0.00237915	-0.0513003	-0.0166291	-0.028774	-0.0178709	-0.0664143	-0.0616101	-0.0508677	0.0457445	0.053559	0.0312802	0.0425569	-0.0499265	-0.0369432	-0.06457	-0.0755517	0.0515786	0.0481154	0.0276499	0.0176522	-0.0404783	-0.0343875	0.0761683	-0.00133978	-0.011604	-0.00483508	0.000263645	-0.0260549	0.00891401	-0.000263693	0.000984952	-0.0427375	0.0205737	0.000617408	0.0192392	0.0031721	-0.121697
PACSIN1_Q9BY11	0.0221712	0.112123	-0.0201985	0.00356996	0.0237089	0.0337503	-0.128233	-0.00891686	0.166769	-0.217685	-0.0190719	0.0836887	-0.00357882	-0.0223607	0.0337525	-0.109509	0.0489996	-0.0538622	0.0014741	0.0627517	-0.0563267	0.0834422	0.0487838	0.041988	0.0664347	-0.0014756	-0.0122441	-0.102903	-0.136165	0.0425689	-0.0144641	-0.179458	-0.251013	0.0208349	-0.292548	0.0485057	0.244639	0.121634	-0.00456291	0.0779879	-0.109935	-0.00944133	0.25091	-0.168692	-0.0466387	0.0235968	0.00454852	-0.121548	-0.345214
SNX2_O60749	0.0231799	0.00268767	0.0206098	0.0101619	-0.00337936	-0.00269268	-0.00385352	0.00867425	0.00370288	-0.0523565	-0.0121243	-0.038293	0.0448464	-0.0240041	-0.00726048	0.0815473	0.00818109	-0.0236968	0.00899757	-0.0421981	0.00107013	0.00153116	0.00379263	-0.0492425	-0.0638452	-0.112445	-0.0476629	-0.0688337	0.0141861	0.0218147	0.00339678	-0.00107093	0.054025	0.0105009	0.0771843	-0.0169789	-0.0110591	-0.0599004	0.0287996	-0.0105779	-0.0301941	-0.0225996	0.0220942	-0.0508715	0.0174517	-0.0297159	0.0212283	0.0181877	-0.065154
SNX2_O60749-2	0.00567445	-0.0824971	0.0169591	0.025423	-0.087363	-0.078925	0.0347933	0.108427	-0.00569685	-0.165439	0.0931789	-0.0736571	0.122975	-0.181286	0.0937481	-0.0441832																	0.319224	0.165694	0.0700785	-0.0920238	0.048189	-0.138869	-0.0498544	0.068578	0.12397	-0.277284	0.660199	0.363295	-0.130749	-0.0718784	-0.190202	-0.337612	-0.351169
SNX1_Q13596	0.0269326	0.00347258	0.0222983	0.00403615	0.0148669	-2.88291e-05	0.0035347	2.88286e-05	-0.0333099	-0.0159262	-0.012386	-0.0134145	-0.00798227	-0.0141084	0.00786953	-0.00517425	0.0145918	0.00886124	0.0380798	0.0109044	-0.00996762	-0.0349571	-0.0162888	-0.00690313	-0.0169607	-0.0189293	0.00687025	-0.0129432	0.0350938	0.0125538	0.0159701	-0.0183966	-0.0177509	0.00281671	0.0191155	0.032274	0.0155652	-0.0215617	0.0208737	-0.00727743	-0.00486875	0.00598512	-0.0309564	-0.00282222	0.0115578	-0.00717081	0.0104363	-0.00757648	-0.105187
RBBP6_Q7Z6E9	0.0169825	0.00287429	0.0529391	0.0148494	-0.000676729	-0.020289	-0.0427833	0.0175939	-0.00142543	-0.0487111	-0.00117351	-0.0303729	0.0175278	-0.0354592	0.000676412	0.0773764	-0.0331855	-0.0448602	-0.0136174	-0.0329587	0.00385223	0.0646698	1.27001e-05	-0.0142446	-0.0255102	0.0216248	-1.27002e-05	0.065824	-0.011826	0.0327282	0.000181254	0.0181926	-0.0872778	-0.0705274	-0.10649	0.0202297	0.00400421	0.0557955	0.00717617	0.0717112	-0.00401536	-0.0143099	0.0189973	0.0267928	-0.0161441	0.0714101	-0.0320896	-0.0651736	-0.192318
GRHPR_Q9UBQ7	0.0343734	-0.0227841	0.0624536	-0.0753387	-0.0229743	-0.0236674	0.0561324	0.00375876	0.111545	-0.0283776	0.040179	-0.0579502	-0.0048236	0.000379091	0.0175757	-0.000379191	-0.0521296	-0.105563	-0.118588	-0.126082	0.208999	0.096232	0.208225	0.16889	-0.0857807	-0.114458	-0.050424	-0.109107	0.17029	0.0711776	0.148693	0.048721	0.0268559	0.0577114	0.0109637	-0.0494547	0.00354315	0.00418874	-0.00355188	-0.0305755	-0.0213228	-0.0675155	0.0389565	-0.0186693	0.00727201	-0.0385601	0.0111771	-0.0128263	0.106665
GPD2_P43304	-0.0209396	0.0318852	-0.00373579	0.00196354	-0.0358133	-0.0326366	-0.0108615	0.0295725	-0.00161673	0.0084588	-0.0167568	0.0284261	0.00161492	0.0606826	0.0115877	-0.0128029	-0.0280202	-0.00576629	-0.0104947	0.0297593	0.0119924	-0.005634	0.00561209	0.0419919	0.0166341	-0.0195858	0.00747373	0.00741623	-0.0228982	0.0285451	-0.0139076	-0.0122748	-0.0117305	0.0387606	0.00582046	0.0657603	-0.0129708	0.0178618	-0.0185727	0.0416696	-0.00584404	0.0557315	-0.0233339	0.0237814	-0.0408292	0.0233993	-0.020949	-0.0176855	-0.132094
SHC1_P29353-6	-0.0207811	0.00316027	0.0377123	-0.0207411	-0.111384	-0.00316721	-0.0369156	0.0489868	-0.077109	0.00955457	0.0279212	0.0521793	0.0920153	-0.0532471	-0.0131775	0.119942	-0.152745	-0.201244	-0.172053	-0.177476	0.584437	0.686109	0.558644	0.594829	-0.137656	-0.18887	-0.115834	-0.0970656	0.362624	0.136957	0.281916	0.0909446	-0.0245708	-0.0848613	-0.0416212	0.0325689	0.0133983	-0.00341122	0.0108346	-0.0250921	0.205954	-0.113334	0.154114	0.0180403	0.00314639	0.169994	-0.00315327	-0.00960427	0.0803442
SHC1_P29353																	-0.145901	-0.0560006	-0.000540861	0.0177218	-0.318835	-0.0801846	0.289071	-0.230214	0.165992	-0.393487	0.214586	-0.281089	0.243455	0.157815	0.000540658	0.287878
C9orf64_Q5T6V5	-0.0161169	0.00321526	-0.0532136	-0.0328873	-0.00322244	0.0109294	-0.0168179	0.00424282	0.0257109	-0.0691433	0.0289181	-0.0149565	0.0276315	0.0162952	0.0168113	-0.00750936	0.0494177	-0.0190561	0.00434415	-0.0397806	0.00991574	-0.0736115	-0.0289816	-0.00155424	0.00169562	0.00173946	-0.0271562	0.00155257	0.0464258	-0.0259093	0.0454525	-0.00481609	0.0458139	-0.0470565	0.0499433	-0.00271437	0.0570103	0.0140289	0.00979529	-0.0624813	-0.0514902	-0.0816128	-0.0580787	-0.0322175	0.0132212	-0.0170364	0.0154282	0.00270928	0.216559
STIM1_Q13586	0.0901636	0.0151625	0.0637543	0.00824717	-0.00853408	-0.0475616	-0.000628884	-0.0149779	0.00062861	-0.11309	0.0171672	-0.0142026	-0.0223353	-0.0745141	0.0389398	0.0264864	0.0161035	-0.0669917	0.00520665	-0.0787472	0.148485	0.370208	0.171571	0.119142	-0.179435	-0.230995	-0.0699222	-0.119287	0.101895	-0.00522551	0.0562539	-0.0400022	0.00270085	0.00168069	-0.0151472	-0.039679	0.0130073	-0.0266956	0.0463424	-0.0397479	-0.00656474	-0.0536725	0.0555979	-0.00821671	0.0525052	0.00354967	0.046846	-0.00168265	0.00543235
STIM2_Q9P246-2																	-0.0101289	-0.143468	0.112281	-0.0176313	0.318845	0.268806	-0.0301154	0.0621212	-0.104477	-0.159313	-0.269172	0.0835442	0.0174664	0.0100583	-0.0519709	0.0615112	-0.13804	0.0103192	-0.0460216	0.110582	-0.199152	-0.0280351	0.0103468	0.147185	0.245337	0.106495	-0.0519721	-0.0016554	-0.0916723	0.0146029	0.0016535	-0.0837194	-0.321349
RBM33_Q96EV2	0.0187134	0.00745155	-0.0255683	0.101284	-0.0216152	-0.059328	0.0215623	-0.0502343	-0.00749024	-0.0736102	0.0158153	-0.0881015	0.0109876	-0.0674892	0.0320104	0.0806599	-0.0346102	-0.00385371	-0.0090499	-0.0477914	0.0809165	0.187647	0.169244	0.086195	-0.00738462	0.00384345	-0.050855	-0.0660851	0.0846823	-0.033792	0.0329193	0.0607743	-0.0494287	-0.0459795	0.0445324	0.00190628	0.0107034	-0.0882389	0.0205109	0.0108959	0.00771573	-0.0784594	-0.0818919	-0.00190881	0.0283127	-0.0759743	-0.0206052	0.0172354	-0.161625
IWS1_Q96ST2	0.00359617	0.0138555	-0.00360516	-0.0435158	-0.0202441	-0.0584917	-0.0242666	0.0180607	0.00885088	-0.0152707	-0.00639092	-0.0374729	0.033736	0.00428255	0.0104752	0.0657326	-0.0393479	0.00407184	-0.0817521	-0.0269126	0.0342221	0.00715697	0.0297381	0.0155644	0.00147392	-0.0144762	0.000890074	-0.0168296	-0.00969236	0.00313187	-0.00465556	-0.000890623	-0.0412824	-0.0458146	-0.0364019	0.0184142	-0.0239989	-0.0179084	0.0163947	0.0191049	0.0303974	0.0211684	0.0204786	0.0777794	-0.0124888	-0.00108823	-0.028649	0.00108741	-0.11542
PIK3C2A_O00443	0.0671356	0.000957963	0.0411123	0.0701667	-0.0390343	-0.0009586	-0.0369625	-0.025215	0.0212157	-0.0562145	-0.0147139	-0.0191447	0.0462101	-0.0104174	0.0163065	0.0784044																	-0.0111833	-0.0389727	0.0568636	-0.0126442	-0.0133462	0.00312485	0.00453319	-0.0101482	-0.0209713	0.0289851	0.0883578	0.0358279	-0.00313163	0.0099218	-0.00680462	0.0638468	-0.00343755
ARID4A_P29374																	0.223852	0.139052	0.267377	0.0218644	-0.0697313	0.188845	-0.0940735	-0.026617	0.000102939	-0.000102946	-0.12274	-0.182711	0.212822	0.0861811	-0.238014	-0.186716	0.0632459	-0.0965979	-0.0663907	-0.0923621	0.0317613	-0.124561	0.00199733	-0.00200009	0.0554667	-0.133694	0.201107	0.0770049	0.0403327	-0.00591803	-0.0155527	0.064618
ARID4B_Q4LE39	0.10116	-0.0202808	0.107073	0.0380204	-0.0150222	0.012808	-0.0281339	-0.0107751	-0.0219471	0.0252114	0.0209687	-0.0863095	0.0211716	-0.0391826	-0.137038	0.0106952	-0.0489474	0.0125994	-0.0391779	0.0585042	-0.0080351	0.142992	0.0747538	-0.024048	0.00371077	-0.0753607	0.01331	-0.0183446	-0.0292216	0.0991248	0.00991905	-0.00372034	-0.0882457	0.0459684	-0.0215761	0.0685918	0.0253136	-0.023928	-0.0127944	0.0505492	0.00662603	0.00391838	0.064789	-0.00392905	-0.0365827	-0.00636619	-0.00462959	0.0489896	-0.23763
LIN28A_Q9H9Z2	-0.0533884	0.0746848	-0.0196116	0.0718473	-0.14593	0.0720248	0.0331128	0.274544	-0.0471241	-0.0745671	0.0936099	-0.0553258	0.0193486	-0.131824	-0.0244165	0.227155	0.0718096	0.419714	-0.092327	-0.143184	0.0277281	0.179609	-0.0822699	0.125276	0.0919982	0.113422	-0.0503881	-0.299483	-0.450301	0.0176539	-0.0535263	-0.0178727
LIN28B_Q6ZN17	-0.0349831	0.0523065	-0.0264745	-0.00829543	0.008248	0.0401172	-0.0240714	-0.0415305	0.0217264	-0.0119576	0.0150623	-0.0343359	0.0289251	0.0277357	0.0118479	-0.0186954	-0.021471	0.00430579	0.0155506	0.0639063	-0.0739245	-0.0074445	-0.0578634	-0.00431868	0.0497267	0.0186839	-0.0226207	0.0134982	-0.1364	0.0191186	-0.0677072	0.0392692	-0.0276822	0.0228958	0.0306035	-0.00019833	-0.00324126	-0.0192656	0.00414484	0.045568	0.0343868	0.00670179	-0.0225575	-0.0200814	-0.0208228	-0.0265238	0.000198302	0.0169825	-0.0710015
LIG3_P49916	0.0220014	0.0065567	0.0436768	-0.00658663	0.0415366	-0.0292337	0.023494	-0.0600121	-0.0343852	-0.057237	0.0214506	-0.0343357	0.0425445	-0.0493937	0.0267864	-0.0384819	0.0455775	0.00609622	0.0141938	0.0182983	-0.00420081	-0.0627925	0.00418861	-0.0211041	0.0194974	-0.0414721	-0.0596787	-0.0396616	0.00496618	0.0361542	-0.0156019	-0.0185077	-0.0135054	-0.0224753	0.0755617	0.0162156	0.0817563	-0.0623575	0.0202758	0.0151595	-0.00105654	-0.0216763	-0.00406005	0.00105577	-0.00944418	-0.0608639	0.0744324	0.00541326	-0.021229
CDC73_Q6P1J9	0.0826594	0.00669774	0.0235674	0.00904818	0.037098	-0.0525239	0.024983	-0.0470853	-0.00672898	-0.0505664	-0.0256108	-0.0674232	0.0303204	-0.0591082	0.00847353	-0.0671408	0.00926906	-0.0902266	0.0175463	-0.0800156	0.0404492	0.072414	0.129748	-0.00440163	-0.0818257	-0.137106	-0.0496923	-0.113372	0.0580576	0.0315705	0.00249015	-0.00249445	0.00553714	-0.0319436	0.0369117	-0.0129862	0.0652162	-0.0189579	0.0137011	0.0146294	0.00461672	-0.0419919	-0.00849115	-0.0872834	0.0478181	-0.0356669	0.0662418	-0.00463154	-0.00544865
DNAJC6_O75061-2	-0.00950899	-0.000320416	0.0147494	-0.0398839	0.0393537	-0.00636168	-0.0426612	-0.00845603	0.0213391	-0.0850007	0.000320345	-0.0758375	0.111539	0.0725448	0.0224561	0.0401722	-0.00661868	0.0477178	0.0494583	0.0303791	-0.000527917	-0.0109761	0.000527724	-0.0924176	0.0740629	0.041064	0.155802	0.118067	-0.0640045	-0.0777288	-0.0325146	-0.0436468	-0.115877	-0.0106823	-0.0703469	0.0223165	-0.0517648	-0.00242102	-0.00559675	0.0118822	0.00901273	0.039763	0.0460544	0.0376403	-0.0242109	0.000858317	-0.000858828	0.0235619	-0.195828
DUSP3_P51452	-0.0427614	-0.0236919	0.0580167	0.00483184	-0.072433	-0.00433601	0.0352346	0.000404613	-0.109578	0.0133678	0.0338585	-0.0870464	0.00740984	0.0105951	-0.0818562	-0.000404726	-0.00891296	0.0297077	0.0194386	0.0430543	-0.00396822	-0.083864	-0.045235	-0.0543361	-0.00250952	-0.00733832	0.00936317	0.00250517	-0.0366862	0.0107012	0.00378765	0.0135421	-0.0146422	-0.0162341	0.0164172	0.00560618	-0.0325565	0.0392902	0.00746017	0.00967496	-0.0505913	-0.0699281	0.0549655	0.0141991	0.0619735	-0.0670324	-0.00562805	-0.0439485	-0.138423
VDAC3_Q9Y277	-0.0122482	0.00514077	-0.0116995	0.0242875	-0.0751395	0.00823228	-0.00515915	0.0706463	-0.0970449	0.0526671	-0.0168203	0.0235799	-0.0108141	0.0144001	-0.0317243	0.0492595	-0.0556858	9.33807e-05	-9.33867e-05	0.0216278	-0.0656441	-0.0908237	-0.115938	-0.0739789	0.000826382	0.046554	0.036216	0.0484415	-0.0901069	0.00713139	-0.0639631	0.0272251	-0.0735554	0.0521524	-0.0469948	0.00878814	-0.0311034	0.00479954	-0.000765719	0.00345452	-0.0374243	0.000765313	0.0595811	0.0398217	-0.0271789	-0.0545037	-0.0163386	0.00227861	-0.147231
VDAC1_P21796	-0.0261075	-0.000439686	-0.0511084	-0.0160471	-0.0508975	0.00620839	0.0100943	0.037167	-0.0117625	0.0700629	0.000439552	0.0318129	-0.0562139	0.0360932	-0.0160588	0.0320822	-0.036413	-0.0155781	-0.0637285	-0.00793608	0.0187957	-0.0237405	-0.0707683	0.0342699	-0.0223957	0.0706172	0.0336032	0.0649813	0.000889376	0.0459715	-0.000889924	0.0346201	-0.0590012	0.0595853	-0.0329598	-0.00228899	-0.036985	0.0514119	-0.00166805	0.0228005	-0.0282378	0.0360673	0.0338835	0.0545478	-0.0333173	0.00166612	-0.0313202	0.0126161	-0.0751869
WIZ_O95785-3	0.0543177	0.0463329	0.0470233	0.0180774	-0.0044722	-0.0137473	0.0072508	-0.00553277	-0.0307539	-0.0533436	-0.0295852	-0.139978	0.0934427	-0.0843487	0.00445838	0.0933822	0.0459251	-0.0325407	0.00203505	0.00454464	-0.0876639	0.0502127	-0.0216538	-0.101247	0.0917753	0.0278854	-0.00203793	0.00757565	0.0305176	-0.0391742	-0.0451786	-0.0590864	-0.0919026	-0.0182098	-0.0460289	0.0329263	0.0352477	-0.0328358	-0.00741847	-0.0109787	0.00323974	0.022511	0.00795666	0.0380441	0.00972498	-0.0262055	0.0279261	-0.00324703	-0.0467068
ASAP3_Q8TDY4	-0.00683154	0.14052	-0.00103433	1.05285	0.00103359	-0.283514	0.257916	-0.258798	-0.211479	-0.00828158	0.214502	-0.264454	0.121512	0.0349495	-0.18601	0.0866555	0.0178017	-0.13178	0.120056	-0.0236978	-0.0183046	0.182125	0.0374591	-0.00418577	-0.0403173	0.159482	0.0333244	-0.0971362	0.122138	0.00417366	-0.0876335	-0.0780809	-0.00785454	0.146563	0.0389898	0.0348076	0.041665	-0.170171	0.0511967	0.00781201	-0.0272754	-0.162409	-0.0177811	-0.0569768	0.0879503	-0.00935672	-0.0291206	0.0241662	-0.118645
EMG1_Q92979	-0.0127064	-0.0131156	-0.00272625	0.00272111	-0.0225173	0.0307435	-0.0102118	0.00887644	-0.0144789	-0.056264	0.0153978	0.0154183	0.0797943	-0.0883181	0.0299944	0.0472709	0.0768129	-0.0444217	0.0414589	-0.0137412	0.0331506	-0.0497236	-0.0479859	-0.0404492	0.0310999	-0.0401909	0.0515484	0.000315654	0.0356684	-0.000315723	0.0240761	-0.0620835	-0.00238	-0.0851785	0.03918	0.00520522	0.0553942	0.00237608	0.00245429	-0.0519458	0.0119031	-0.0689897	-0.00688551	-0.0143067	0.0395186	-0.0449351	0.0587078	-0.0175452	0.101867
ACVR2B_Q13705
TCF3_P15923	0.0868768	0.00599908	0.116885	-0.0927641	0.0149008	0.0130408	-0.0643648	0.0759028	-0.0108551	-0.0607977	0.0382329	-0.00602413	-0.0222486	-0.0349755	-0.0447215	0.0464049	-0.0828867	-0.000223483	-0.0526627	-0.010553	0.00441046	0.0511566	0.000223448	-0.0845333	0.0796801	0.00645676	0.073659	0.031455	-0.141221	-0.0193976	-0.0936225	0.0154885	-0.147311	-0.0437496	-0.0501778	-0.227335	0.208539	0.232399	0.0507106	-0.367675	-0.137873	0.101928	0.322743	0.0565185	-0.163788	0.100637	0.0424619	-0.190974	-0.102497
TCF3_P15923-2
TCF3_X6REB3																	0.230574	0.26043	0.229747	-0.0207252	0.0014198	-0.0014212	-0.240218	0.0774732	0.297241	-0.0411402	0.109757	0.428388	-0.282266	-0.217567	-0.274199	-0.060931
TCF12_Q99081-3	0.00718862	-0.00722462	0.0102272	-0.0849327	0.136872	-0.0271924	-0.105046	-0.0388397	-0.131357	-0.0896392	0.015357	-0.0233394	0.0636789	0.0593786	0.0606054	0.0572136	-0.0957296	0.00479257	-0.0611692	0.0596854	-0.0905427	0.0107479	-0.0196878	-0.0563512	0.103067	0.0544232	0.0889103	0.0234749	-0.0989926	0.00690021	-0.0857282	-0.00480855	-0.0607265	0.0476458	-0.0133557	-0.0297649	-0.0217284	0.0712707	0.0216598	0.0650527	-0.00510514	0.00568297	-0.0318939	0.00508714	-0.0754164	-0.0203724	0.0776124	0.0500762	-0.171112
TCF4_P15884																	-0.0585513	0.0413649	-0.00871538	0.00866305	-0.0700088	0.0484376	0.0961031	-0.0179389	0.139974	-0.0791943	-0.0233587	-0.0211306	0.099525	0.081685	-0.064774	0.0741855	-0.199502	-0.00749714	0.0337788	-0.0140164	0.00745838	0.0701546	-0.0171667	0.0587444	0.144724	0.0101009	-0.00970887	-0.00775047	-0.114406	0.209249	-0.110725	0.0722429	-0.0870481
SPEN_Q96T58	-0.139236	0.0618044	0.0222292	-0.169068	-0.0958772	-0.0869718	0.187756	-0.0902237	-0.119388	-0.0750886	0.0818333	0.12043	0.21568	-0.0225771	0.167683	0.168944	-0.0531975	0.0209802	0.0601436	0.0310782	-0.230794	-0.223127	-0.256824	-0.176453	0.098112	0.0754581	0.0412385	0.0327965	-0.214261	-0.0186062	-0.132899	0.0183693	-0.0375789	0.01719	0.0947532	0.0808283	0.00469869	0.00915933	0.0194701	-0.0712609	-0.127512	-0.00471404	0.0226935	-0.0722764	0.0168268	-0.023526	-0.119969	-0.128969	-0.175427
EIF2B5_Q13144	0.0475886	0.00713278	0.0441638	-0.0176477	0.00365184	-0.027647	0.0173001	-0.00281568	-0.0128634	-0.0526215	0.0567314	0.00281019	-0.0245117	-0.0357159	-0.0116919	0.0126127	0.0328381	0.0040495	0.0239979	-0.011915	-0.00406089	-0.126704	0.0102026	-0.0192654	-0.0299958	-0.0840503	-0.117114	-0.121525	0.0271045	0.0063643	0.0495229	0.0107243	-0.00560331	-0.000808037	0.0394599	-0.0191463	0.0274211	-0.0261277	0.0173729	0.000807584	-0.00408632	-0.0259353	0.0468592	-0.000877219	0.00518669	0.0417029	0.0304639	-0.00720065	-0.0605469
EIF2B5_A0A3B3ITK8
PRPF3_O43395	-0.0255738	0.00102282	0.0243701	-0.0245727	-0.00102354	0.0453191	0.0683669	0.0086491	-0.0298377	-0.0392434	0.0273216	-0.0930584	0.117114	-0.0428364	-0.0116017	0.00551645	-0.13368	-0.119409	-0.0929992	-0.00303346	0.125317	0.128308	0.188077	-0.0278184	0.0209277	-0.111734	-0.0626122	-0.0425771	0.0696109	0.0989604	0.0797717	0.00302709	-0.0863215	-0.0709046	0.0229705	-0.000579841	-0.0273758	-0.0429792	0.000579608	-0.00379977	0.0512606	-0.0563303	0.0456503	0.00971628	0.00521271	0.0677103	0.0438411	-0.00538229	-0.00671013
ASMTL_O95671	0.0511751	-0.000101577	0.0324567	0.0295624	-0.010963	-0.0242761	-0.0243231	0.00839462	-0.106614	-0.0310698	0.0338058	0.0246938	0.00010157	-0.081833	0.0333908	-0.0344137	0.0431922	0.0646959	0.0927992	0.10592	-0.0103607	-0.0221108	0.00938805	-0.020513	0.0955176	-0.00438819	0.00437489	-0.0438493	0.0146398	-0.0137757	-0.020602	-0.039036	-0.0207811	-0.0599485	-0.00857031	-0.0308351	0.0216872	-0.0120183	0.0433905	0.00851969	0.0419875	0.00891666	-0.0115621	-0.0324704	0.0584014	0.0872393	0.010045	-0.00964126	0.00120338
CAND1_Q86VP6	-0.0185822	0.0389573	0.000330609	-0.0323306	-0.00594771	0.037034	-0.00987452	0.021468	-0.0358061	0.0492151	0.0236919	0.0274945	-0.00418192	0.0514079	-0.000330685	-0.0071323	0.0355797	0.0496418	0.0175124	0.0546285	-0.0445267	-0.168414	-0.144001	-0.0544741	0.0459107	0.114063	0.0499523	0.0543925	-0.0706258	-0.0908975	-0.0637146	-0.0177276	-0.0122395	0.0398258	-0.00603826	0.00684639	0.0129457	0.0453641	-0.0400409	0.00152064	-0.00624028	0.0304293	-0.0286772	0.0328317	-0.0180038	-0.00152224	-0.026662	0.0248697	-0.0282138
CAND2_O75155	0.0329638	0.017396	-0.00222383	-0.0227115	-0.00901459	0.00222041	-0.00271822	0.0107224	-0.00591044	0.00684841	0.00442475	0.00287194	-0.0186032	0.0392348	-0.0141293	-0.0155926	-0.0346013	-0.000688593	0.0229611	0.0461289	0.000688265	0.0119077	0.00730512	-0.00748834	0.0166461	-0.0714445	-0.0602893	-0.0261315	0.0762883	0.00729823	-0.0159051	-0.0138266	0.0102507	0.00747261	-0.00365665	-0.00672119	0.0217326	-0.0173282	0.0136108	-0.0104379	-0.0187738	-0.000831659	0.00505001	0.00976059	0.0416702	-0.0384451	0.00083118	-0.0101731	-0.106877
CAND1_F5H6I6	0.0361302	0.0471664	-0.0518531	0.544185	-0.0160696	-0.124793	0.137509	0.0959416	-0.0393398	-0.0440091	-0.0495973	0.0429716	-0.0292587	-0.00113222	0.00113133	0.0174179																	-0.0430528	-0.036318	-0.0633945	0.183944	0.0354262	-0.0787373	-0.118915	0.0632447	0.064548	-0.0429191	0.169168	0.0682431	-0.0989319	-0.0531541	0.0563118	0.0434247	-0.496672
ATP2C1_P98194-7	0.00734842	-0.0134763	0.0166234	0.0581882	0.0326518	-0.0968611	0.041699	0.0242326	-0.0653798	-0.154344	0.047074	-0.0437078	0.072328	-0.127409	-0.0288224	-0.00738604	0.00731297	-0.0413199	0.0405494	0.0472397	-0.00735023	-0.0415802	-0.0438583	-0.122224	0.0899132	-0.0259744	0.0185437	-0.0686225	0.0105095	-0.0569739	0.0449797	0.0104615	0.222851	0.134459	0.0491208	0.0382519	0.122053	-0.15456	0.0848042	0.0358454	-0.21876	-0.191901	-0.138065	-0.0367588	0.246969	-0.298466	-0.147973	-0.1068	-0.308893
ATP2C1_P98194-3																	-0.00365757	-0.183931	0.207368	0.170106	0.0827242	0.0251518	-0.0374115	0.00260555	-0.0422962	0.112292	-0.00261027	-0.0606805	0.127434	-0.106285	0.00655385	-0.126812
TP53BP1_Q12888-2	-0.0317994	0.0120238	-0.00726173	0.024854	-0.0116685	0.00603476	-0.00413913	0.0127129	-0.0199864	-0.0153161	-0.0370588	0.016199	0.0143461	0.00412729	-0.0263993	0.00523664	-0.0376334	0.0366541	-0.0151213	0.0373	-0.0194234	-0.0416539	-0.000402985	0.0052838	0.0205979	0.0450399	0.0035458	0.000402872	-0.0209572	0.0593838	-0.0018149	-0.00136183	-0.0481485	-0.0355954	-0.0102632	0.00965637	0.0166305	0.000893325	0.00522744	0.0390687	0.0436214	0.0057841	-0.000893878	-0.0110425	-0.0534008	0.0553196	-0.0596779	-0.00638477	-0.11482
CDT1_Q9H211	-0.11685	-0.329214	0.0309051	0.00666061	0.319779	-0.339439	-0.40163	0.533443	0.238034	-0.00669151	-0.284519	-0.326679	0.473836	0.292039	-0.0537516	0.412044	0.0118098	0.0302799	0.0117503	0.071626	-0.000396558	-0.00666371	-0.0133258	-0.159371	0.0666753	0.000396449	-0.036517	-0.048602	0.0952129	-0.114537	0.0591233	-0.027692	0.00888126	0.047144	-0.00619945	-0.0613098	0.0811858	-0.0113716	-0.0494403	0.116868	-0.0344485	0.106129	0.00617292	0.0503533	0.0778894	-0.0156555	-0.0184173	-0.189742	-0.15202
QRSL1_Q9H0R6	0.0119017	0.140229	0.0615125	0.0260441	0.0827112	0.00545855	0.0233142	-0.135833	-0.107699	-0.345532	-0.00547928	-0.216083	0.033004	-0.0425937	-0.284416	-0.0569496	0.0199898	-0.0926321	-0.118707	0.0746249	-0.265497	-0.0895734	0.130633	0.0795669	-0.0104726	-0.265276	0.0103971	-0.0904313	0.0817422	0.105317	0.0833188	-0.139036	0.0219733	-0.00817811	0.0742028	0.0663951	0.0282982	0.0589163	-0.108743	-0.00275088	-0.023504	-0.0117047	-0.0347187	-0.0670661	0.0542955	0.026728	0.00274565	-0.148614	-0.147224
BOD1L1_Q8NFC6	-0.081061	0.0082819	0.0152105	0.0553205	-0.0243857	-0.0219859	-0.0525695	0.00853205	0.00687654	-0.0409429	-0.0226119	-0.0196229	0.0294122	0.0108732	-0.00690948	0.0314509	-0.00450731	0.050243	0.0076012	0.0727091	-0.065905	-0.0261535	-0.0101105	-0.0364436	0.0605528	0.0190851	0.0627801	0.081026	-0.0841447	-0.020736	-0.059605	0.00449327	-0.0449144	0.0121968	-0.0337555	-0.00650826	0.0136381	0.0211123	0.00647903	0.0170299	-0.0332877	0.0261038	0.00719815	0.00826583	-0.079082	-0.0232052	-0.0281164	-0.0147078	-0.173223
BOD1_Q96IK1																	-0.157256	-0.146119	-0.0830871	0.202673	-0.00396015	0.366667	0.141987	0.00394931	0.204993	-0.479975	-0.242939	-0.00770485	-0.176545	0.34356	0.0319225	0.0383212	0.235219	-0.223768	-0.0774597	0.471817	0.0865494	0.704789	-0.409427	-0.393569	0.408291	0.243094	-0.218382	-0.223178	0.203249	0.0735119	-0.398449	-0.153822
TRPM7_Q96QT4																	0.195759	-0.534031	0.0628092	0.338454	0.30239	0.000952184	0.035139	-0.170334	-0.239511	-0.0505169	-0.000952813	-0.0166463	0.518274	-0.165914	0.176575	-0.0666086	-0.132733	0.0259228	0.00668917	0.106289	0.136126	-0.044632	0.155602	0.0255412	0.0711914	-0.0272573	-0.187563	-0.00672033	-0.0171406	-0.202059	0.0427643	-0.0495007	-0.223392
SRPK2_P78362-2	0.0388168	0.0219969	0.00405335	-0.00413424	0.0148229	-0.00687611	0.0299769	-0.00406477	-0.106705	-0.0219975	0.00680902	-0.00469239	0.01249	-0.00425928	0.0196893	-0.0621934	-0.0478149	-0.00945238	0.0246993	0.00939085	-0.0970874	-0.133372	-0.128985	-0.0696143	0.0566166	0.051292	0.106347	0.0929849	-0.13542	-0.0209886	0.114617	0.150065	-0.0212464	0.0828376	-0.0633932	0.0547506	0.085521	0.0814744	-0.0484308	0.0194512	-0.0207216	0.028204	-0.0041516	0.0611782	0.00413969	-0.0899088	-0.00655716	-0.0214362	-0.0786672
SRPK1_Q96SB4	0.0113377	0.0376194	-0.0162625	-0.011231	-0.00259868	0.0176253	-0.0494248	0.00259401	-0.0275042	-0.0278378	0.0272561	-0.0213493	0.0471788	-0.0514777	0.0236709	0.0379201	-0.0739749	-0.0530578	-0.0779068	-0.0305986	0.0169842	0.0935837	0.140708	0.05857	-0.0627691	-0.0807026	0.170458	0.170109	-0.0329241	-0.0171865	0.268907	0.304045	-0.00967961	0.0735902	-0.00134464	0.0363286	0.0709496	-0.0217321	0.00300756	0.0204236	-0.0116439	-0.00770395	-0.00259287	0.0181216	0.0160158	-0.0455061	0.00134339	-0.0364241	-0.0185814
AP2A1_O95782	0.0647342	-0.0125159	0.0383561	-0.0165722	0.0148253	0.0227048	0.0293499	0.0429225	-0.0512614	0.0323643	-0.0105001	-0.043441	-0.0121817	-0.0444491	0.00115812	-0.00115905	0.0771714	-0.0374001	0.0556086	-0.0379233	0.00247956	-0.107918	-0.0561002	-0.144161	0.0484854	-0.00248383	0.143457	0.0606541	0.0211871	-0.0531209	0.0382162	-0.0313536	0.0241171	-0.0309214	0.014909	-0.0600263	0.0136287	-0.0103403	-0.00893597	-0.0527976	-0.0385884	0.00888097	-0.0137657	0.0141956	0.0327052	0.0155487	0.0228724	-0.0223275	0.271663
AP2A2_O94973-2	0.110378	0.0938025	-0.0468331	0.25388	-0.006249	-0.0662293	0.0799788	-0.0657311	-0.187753	0.216449	-0.128385	-0.107845	0.108738	-0.14122	0.147914	0.00622205	0.00026104	0.0339085	-0.0319514	0.0424696	0.00354425	-0.0925058	-0.000261087	-0.11078	0.0570265	-0.0254657	0.0195096	-0.0299923	-0.0366903	0.0096937	0.0028942	-0.0347555	-0.1114	0.0892806	-0.117428	-0.00923253	0.0173644	-0.0339996	0.00411223	-0.0476483	0.0191643	-0.00412399	-0.0286542	-0.0210693	0.0343451	0.0107592	0.0225162	0.0109243	0.0325584
RCN1_Q15293	0.0221776	0.0002355	-0.00340056	-0.000235538	-0.0201429	-0.0513576	-0.0310862	0.0959854	-0.105229	0.00122556	-0.0146066	0.0520351	0.00112866	0.0271259	-0.0777618	0.0149356	-0.0313706	0.0419204	-0.0397959	0.00453354	-0.0463428	0.0198826	-0.024891	0.00710462	-0.0257981	-0.00454783	0.0137136	0.00944863	-0.0348672	0.049071	-0.057067	0.0113261	-0.0729302	0.0207467	-0.0545913	-0.0168779	-0.0296808	0.0448545	0.0345371	0.0527409	0.0414684	0.100978	-0.100327	-0.0524227	-0.10345	0.0389422	-0.0491532	0.0166827	-0.14879
BCAT2_O15382	-0.0471045	0.0141455	-0.0719705	0.034198	-0.0398838	-0.00223415	-0.00371854	0.0589391	-0.0116068	0.136548	-0.027042	0.00223069	0.0241542	0.0245957	-0.0286325	0.0648329	-0.0492188	0.0141764	-0.0400516	0.0185954	-0.0252425	0.157761	-0.0440431	-0.02379	0.0132616	0.0640593	0.0317332	0.0480763	-0.0831801	-0.0133847	-0.0556708	0.0244808	-0.0227773	0.0426945	-0.026495	0.000644468	0.00447755	0.0336848	-0.0149729	0.00470136	-0.0102518	0.037138	0.0317117	0.00374823	-0.0488441	-0.000644756	-0.00596659	-0.0170747	0.25226
PLXNA1_Q9UIW2	0.0315655	-0.00148244	0.0697857	-0.011626	-0.0218273	-0.0167048	0.0455702	-0.0152896	0.00148092	-0.0430375	0.00225718	0.0107572	0.0560998	-0.029863	-0.00726239	0.0155321	0.0220363	-0.0386528	0.0559073	0.0554955	0.00184716	-0.0537463	-0.00184952	-0.0466564	0.0557315	-0.0182912	0.0303621	-0.0242872	0.00390191	-0.0255629	0.0225534	-0.0398913	0.0372046	0.00305266	-0.0260574	-0.0330205	0.0394731	0.0282653	0.00226527	-0.0227447	-0.00511454	0.0196285	-0.00226883	-0.0166006	0.0100487	-0.00903396	0.0288323	-0.0488539	0.0967233
PLXNA3_P51805	0.0585132	-0.161546	0.10458	0.488291	-0.0149307	0.0369356	-0.0676345	0.0147778	-0.352926	-0.0685674	-0.0387727	0.175111	0.0487632	-0.161729	0.077066	-0.137521	-0.0449174	0.23646	0.238055	0.153822	-0.348771	0.51577	-0.370116	-0.455072	0.222865	0.0963341	0.184121	0.0435611	-0.371025	-0.368565	-0.279028	-0.301925																	-0.295203
SEL1L_Q9UBV2	0.000983228	-0.000983898	-0.0339564	0.0908014	-0.0304498	-0.0745053	-0.0534792	0.0437024	0.0382958	-0.134945	-0.0554358	0.0317302	0.105726	-0.0621904	0.0515207	0.0458709	0.00102817	-0.00743795	0.0339337	0.0232919	0.0396617	0.055282	0.0795853	-0.0184745	0.0643751	-0.029535	-0.0143064	-0.0579362	-0.00882249	0.0212141	-0.01341	-0.0010289	-0.107664	0.0134841	0.00553445	0.00593412	0.0104858	-0.102611	-0.0303626	0.0170734	0.0231501	-0.086172	-0.00555576	0.0305814	0.0189319	-0.158895	-0.0508944	-0.10592	-0.0999504
PPP1R12C_Q9BZL4-4	0.00685849	0.0431951	-0.00290706	-0.0953945	0.00341259	0.031405	-0.0100424	-0.0238188	-0.00807472	0.00597364	0.00290122	-0.0455264	0.0148617	-0.0471522	-0.0252441	0.0691114	0.0687097	-0.039797	-0.00307709	0.158336	-0.0405495	-0.07858	-0.0132039	-0.10684	0.105691	0.00307054	-0.0170414	0.0841821	0.00848082	0.00581845	0.0411762	-0.0168289	0.126657	-0.000126975	0.0228708	-0.0433099	0.00873898	0.0196725	-0.0301695	0.0630162	0.000126964	-0.014452	0.0385814	-0.0437287	-0.0733252	-0.0554864	-0.0872956	0.0318205	0.0385781
PPP1R12C_Q9BZL4-3	0.0112123	0.0119832	-0.0224127	0.2939	-0.0296301	-0.00438083	0.0969724	-0.0255042	-0.0456735	-0.0254421	-0.0282934	0.00436757	0.100143	0.152101	-0.0340299	0.234339	0.0502716	-0.127748	-0.0746451	-0.148592	-0.00229222	0.0291086	0.113297	0.104818	0.157448	0.124381	-0.16073	0.0128713	-0.1698	-0.303908	-0.0556525	0.00228858
YBX1_P67809	-0.105549	0.0704141	-0.101078	-0.0120969	0.0608185	-0.00973891	0.0370087	-0.0130417	0.00967361	-0.017826	-0.0310094	-0.0644916	0.0122975	0.0279778	0.0198322	0.0483176	-0.156142	-0.0287306	-0.172873	-0.0525552	0.0906481	0.156384	0.0931117	0.103569	-0.106694	-0.0574007	-0.102856	-0.0679801	0.0449512	0.0281696	0.0676831	0.069489	-0.189594	0.0498589	-0.0662035	0.000430245	0.0028276	-0.000430373	0.00900831	0.0569416	0.0844566	-0.0124729	0.00329144	0.0306881	-0.0795735	-0.00796309	-0.0192548	-0.0262211	-0.246112
YBX3_P16989	-0.0255973	0.0401957	-0.0432371	-0.0467271	0.0928073	0.0293142	-0.00919816	-0.00226165	0.110969	-0.00411199	0.00225811	0.00547062	0.0322818	0.137209	-0.0127326	-0.0753205	-0.125045	0.0370293	-0.0855686	-0.00457436	-0.00396253	0.0935254	-0.0757235	0.0245231	0.00395167	0.0641014	0.0483022	-0.0196014	-0.0927435	0.0531967	-0.0204426	0.0564179	-0.132526	0.00452075	-0.0782633	0.00632554	0.0127735	0.0481905	0.0108139	-0.0265938	-0.00453496	0.0211068	0.00597581	-0.0234691	-0.0767028	0.00855081	-0.0358712	-0.0563864	-0.161142
YBX3_P16989-2	-0.0273461	0.109568	-0.049548	-0.186589	0.242274	0.0635395	0.0658675	-0.14293	0.0836598	-0.138537	-0.0808644	0.0157981	0.0283149	0.155675	-0.015973	-0.264955	0.103462	-0.0712406	0.0980114	0.367566	-0.0294448	0.287718	0.186247	-0.0390105	0.174841	-0.115468	-0.120624	0.185997	-0.0541737	0.00784194	-0.0709374	-0.0078848	-0.0672573	-0.0135507	0.0240998	0.0776792	0.0476301	0.0557019	-0.166072	0.04617	0.0313157	0.0213248	-0.256961	-0.0310969	-0.150698	-0.151295	-0.105817	0.0134246	-0.192808
YBX1_C9J5V9																	0.35996	0.0668505	0.00838578	0.140445	-0.0751403	-0.108645	-0.0330465	-0.128698	0.0890396	0.029014	-0.0084348	0.0534902	-0.0364679	0.295405	-0.334541	-0.17623
YBX2_Q9Y2T7	0.0433143	0.0476086	-0.0303938	0.0332053	-0.530131	-0.146496	-0.430239	0.183679	0.123489	-0.182573	0.0451917	0.0297666	-0.0554867	-0.305606	-0.151667	0.0677615
SLC30A10_Q6XR72	-0.0183138	-0.0741995	0.0662155	0.216906	0.0180842	-0.0662673	-0.0193009	0.0977882	-0.0565246	0.196366	-0.0324578	-0.0224334	0.15883	0.0913423	-0.0705848	0.189564	-0.396616	-0.0711513	0.183131	0.317707	0.325647	-0.484501	-0.0524065	-0.260129	-0.0654745	-0.226624	-0.86474	0.169197	0.0505694	0.0837242	0.11262	0.0686561	0.00546529	-0.04664	-0.0786351	0.0626761	-0.0581962	0.0891273	-0.00548608	-0.0805029	0.0560085	-0.262011	0.138514	0.125944	0.0619029	0.0803823	-0.0181458	-0.0755909	0.0738899
TTC38_Q5R3I4	0.0872927	-0.0467867	0.138553	0.0660247	-0.0432037	-0.0148344	0.0168492	-0.0165935	0.0740705	0.0568393	-0.00666083	0.0200044	0.00663022	-0.00947869	-0.0466688	-0.051322	-0.112056	-0.152688	-0.221078	-0.151836	0.220737	0.15641	0.285374	0.140251	-0.169405	-0.192736	-0.0822847	-0.149411	0.144756	0.1067	0.164187	0.0778437	-0.10625	0.00488208	0.018799	-0.0248012	-0.014078	-0.0295032	-0.0146309	-0.0373892	0.0986893	-0.0408116	0.0622137	0.00590547	-0.00489866	0.0111202	0.343716	0.320399	-0.0184337
STXBP2_Q15833	0.0427422	-0.0116446	0.0768221	-0.0636554	0.0400812	-0.049413	0.0391375	-0.0248294	0.0112207	-0.0681406	0.0291471	-0.03054	-0.00812042	-0.0635562	0.0106992	0.00807497	0.0700592	-0.0183743	0.0496028	-0.0241418	0.0420724	-0.0385184	0.0560702	-0.00244895	0.0024448	-0.0944239	-0.061697	-0.0934035	0.0804216	0.0476242	0.0702951	-0.0290866	0.0791369	-0.0350952	0.0823612	-0.0363766	0.00884938	-0.0268361	0.0190402	-0.00487536	0.00124142	-0.0552858	0.00814978	-7.98671e-05	7.98627e-05	-0.00423906	0.0287035	-0.01812	-0.0604593
STXBP1_P61764	-0.0193331	0.0416191	0.0181822	-0.0452775	0.0577474	-0.0543474	0.0419576	-0.0100687	-0.0291095	-0.0181736	0.0657466	0.0443361	0.0248503	-0.0105126	0.00999889	-0.0525202	0.0873632	0.08692	0.0698681	0.0947099	-0.0570649	-0.276145	0.0214963	-0.158989	0.0453785	-0.0126876	-0.0417505	-0.0501195	0.0055806	0.0276783	-0.00560228	-0.0495247	0.00572657	-0.0476666	-0.0295487	-0.0481032	0.00735069	0.00531738	0.0510773	0.00948431	-0.126634	-0.025536	0.0420192	-0.00533705	0.0474489	-0.0688102	0.0579812	-0.0128564	-0.00418173
C5orf24_Q7Z6I8
CCDC137_Q6PK04	-0.0153431	-0.0206885	-0.0534681	0.0151816	0.0820116	0.23641	-0.0656566	0.0749166	0.100442	-0.130205	-0.0197406	-0.0579573	0.0974714	-0.0610042	0.0844565	0.16782	0.0284443	-0.00205855	0.0103495	0.012791	-0.00507275	0.0206809	-0.00721144	0.00205561	0.0592086	-0.128489	0.0538756	0.0371224	-0.146693	-0.0245976	-0.0570624	-0.0212994	-0.164905	-0.209075	-0.055699	-0.0452726	-0.165635	0.189216	-0.0997182	0.0471341	0.228638	0.012	0.0356756	-0.0256132	0.0574895	0.104279	0.0393992	-0.0121007	-0.219465
TOM1_O60784-2	-0.0267013	9.4498e-05	0.0621755	-0.0182779	0.0392799	-0.0243693	0.0145487	0.0803773	-0.114691	0.0674554	-0.0204435	-0.0170833	0.064917	0.0175666	-0.019761	-9.45042e-05	0.022076	0.00610314	0.0322974	0.02619	-0.0510723	-0.00812805	-0.00549266	-0.0131109	-0.00822309	-0.0256721	0.0343222	0.00269077	0.00914791	0.131494	-0.00759734	-0.0026958	-0.012089	0.0168264	-0.0323451	-0.0619053	-0.00708189	0.0532132	0.00704729	0.0261029	0.0512103	-0.0552825	0.0423719	0.0507698	-0.0244888	0.0494073	-0.010261	-0.0498801	-0.188567
TOM1_O60784	-0.311741	0.127494	-0.0950805	0.0598183	-0.00852636	-0.131932	0.0267343	-0.0473418	0.0524626	-0.0591681	0.0703267	-0.101841	0.0780167	0.00255419	0.0876718	-0.00255872	-0.035694	0.0101818	-0.0214922	-0.032708	-0.0116341	0.0729026	0.0915676	0.0789894	-0.0708025	-0.0147672	-0.0102541	-0.0572516	0.0182004	0.0189354	0.0274717	0.0183615	-0.0423649	-0.00345333	0.0177318	-0.0168802	0.0124652	-0.0679706	0.0435417	0.0722416	0.0327502	-0.0994032	0.0232755	-0.00972309	0.00344509	-0.0527338	-0.0140024	0.00862589	-0.0297117
RAPGEF6_Q8TEU7-4	0.0343508	0.0418017	0.0527588	0.000481077	0.00406913	-0.119184	-0.0312404	-0.000481237	-0.0236217	-0.0688549	0.0483485	-0.0575429	0.0408576	-0.0256989	0.00133925	-0.0215988	0.0407815	0.011938	0.0644855	0.011995	0.0117393	0.00113223	0.00681447	-0.0700483	0.0481504	-0.0870898	-0.0178273	-0.00113312	-0.0420272	-0.0186457	-0.0742547	-0.0378261	-0.0580162	0.0137919	-0.0018556	0.0647508	0.0206506	0.0176268	-0.0335984	0.0439705	-0.00681558	-0.0282897	0.0061418	-0.00465446	-0.00336627	0.00185322	0.00645583	-0.0472428	0.0361301
FNIP1_Q8TF40-3	-0.0231683	0.00284596	-0.0415491	-0.00285158	-0.0346391	-0.208479	0.0495769	0.033782	0.0546664	-0.0514796	-0.0636976	-0.017311	0.00829249	0.0664221	0.102875	0.0392049	-0.0082329	0.00470462	0.102114	0.0184695	-0.0147431	0.0878176	0.0510923	-0.0640304	0.0270337	-0.0430253	-0.0156237	-0.0774179	0.00618892	0.00573555	-0.0474072	-0.00472002	-0.157209	-0.0787892	-0.143394	0.018331	-0.0408476	0.00448918	-0.0199114	-0.0045032	0.0505818	-0.0332608	-0.140365	0.0643159	0.0794968	0.12574	0.025085	0.0501599	-0.0911805
MORC3_Q14149	0.0554161	0.0102672	-0.0142213	0.0518932	-0.0360496	-0.0373171	-0.00253698	0.00253252	0.027019	-0.0296581	-0.0136743	-0.0369954	0.0136601	0.0120767	0.0115439	-0.00390943	0.0311017	-0.0388462	0.0276637	0.000803196	0.0183841	-0.0323999	0.0272272	-0.0165981	-0.000519953	-0.109633	-0.0490993	-0.0576684	0.0225321	0.000519766	0.0230994	-0.0535043	-0.00910605	-0.00367366	0.0366885	0.0559817	0.0210493	-0.0227889	-0.00659803	0.0137492	0.012271	0.000388402	-0.056414	0.00089766	0.0268222	-0.000388506	-0.0342354	-0.0293617	-0.00688408
RAPGEF2_A0A2R8YGD3	0.0209234	-0.0586031	0.043369	0.244847	0.0400326	-0.00953537	0.0317788	0.00947276	-0.445683	0.103238	-0.134178	-0.0311025	0.010818	-0.0965652	-0.0354511	-0.0821744	0.0463603	0.0746884	0.443607	0.0891507	-0.405592	1.05553	-0.42356	-0.439416	0.00998456	0.0904432	0.0861411	-0.0100541	-0.389173	-0.251078	-0.318601	-0.162736	-0.0345602	-0.0807447	-0.0334008	0.0494293	-0.0434896	0.0793098	0.0264306	-0.00575342	0.0494651	0.0541701	0.0392767	0.0105916	-0.0121661	0.00573056	-0.0999627	-0.0409477	-0.232422
RFC1_P35251	0.0982231	-0.0890721	0.0654627	-0.0515555	0.0345928	-0.129855	-0.0388652	0.133345	-0.0219966	-0.199937	0.000542389	-0.131663	0.00825194	-0.000542593	0.0961816	0.191411	-0.0547474	0.0503673	0.0106469	0.0530298	0.102099	0.111149	-0.120219	0.0158077	-0.0204199	-0.0962484	0.0749491	-0.010726	-0.0857448	0.0494304	-0.204656	-0.0164464	-0.0707276	-0.0977464	-0.00433723	-0.0481587	-0.0221428	0.0482323	-0.112095	0.00432423	-0.115959	0.0159809	0.0972619	0.0550623	0.0972533	0.0934065	0.0233366	-0.0644439	-0.0285289
KNOP1_Q1ED39	-0.0173948	0.0677747	-0.0336067	0.00581193	0.074252	-0.0138446	0.064389	-0.00583544	-0.163983	0.0447344	-0.0155543	0.0525864	0.0545829	0.102164	-0.0143799	-0.144324	-0.0250763	-0.0258704	-0.00685044	-0.0149003	0.0163283	0.0157926	-0.0306701	0.0390752	0.0285162	-0.00414768	0.0501657	0.00413579	-0.054832	0.119373	0.0373865	-0.0453164	0.137709	0.30874	-0.0417875	0.0406111	-0.0580701	0.10258	-0.0995298	0.0412974	0.0446816	-0.0997828	0.407612	0.267074	-0.23333	-0.0897183	-0.103979	-0.124868	-0.218515
TPR_P12270	-0.0147624	0.00939707	-0.0122407	0.00685323	-0.0174637	0.022733	-0.0368725	0.0131644	0.0288554	-0.0196741	-0.0121732	-0.00688594	0.0259108	0.0412852	-0.00768349	0.0383501	-0.0291501	-0.019466	-0.0579357	-0.0416987	0.0485189	0.129316	0.0304486	0.08208	-0.0345151	0.0135095	-0.0189681	0.000396709	-0.000396818	0.0147042	-0.0116802	0.0379929	-0.0726075	-0.011636	-0.00975591	0.00165991	-0.0259125	0.0186422	-0.00526671	0.0059438	0.0154827	0.0225037	0.0159915	0.0325679	-0.0390679	0.0283556	-0.0153801	-0.00166183	-0.163302
PCM1_Q15154	-0.034967	0.0545216	-0.0134664	0.0325506	-0.0727357	-0.00812411	-0.017712	0.0141346	-0.124272	0.0582944	-0.0113517	0.0201266	0.0414124	-0.00325918	0.00325183	0.0168795	-0.0210513	0.0790121	0.00242661	0.0226683	-0.0293128	-0.047766	0.0174117	0.0133316	0.018143	-0.0201996	-0.0119039	-0.0443609	-0.000906705	0.0519909	-0.00607402	0.000906136	-0.102846	-0.00356319	0.0180155	0.0536408	-0.0204382	0.00760492	0.0193132	0.0535074	-0.0468246	0.0227024	-0.00574748	0.0423925	0.000887696	-0.00514555	-0.000888243	-0.00345222	-0.181549
PCM1_Q15154-5																																																	0.0648342
SLC20A2_Q08357	-0.117086	-0.187383	0.00451256	0.158072	-0.0873274	-0.00452672	-0.0415528	0.14863	-0.14292	0.169959	0.0945883	0.0615225	-0.0137966	0.13816	-0.0886682	0.302257	-0.0328982	0.0329983	-0.087884	0.00944271	-0.00282535	0.11165	-0.0439972	0.0567138	-0.0507166	0.104611	-0.038943	0.00199186	-0.00199461	0.121016	-0.0701034	0.0688313	0.000829115	-0.00464208	-0.0692672	0.094189	-0.0522502	0.0727132	0.20573	0.101312	-0.0314373	0.0134231	-0.0694305	-0.0412049	0.0302323	-0.161755	0.0329733	-0.000829592	-0.293632
SLC20A1_Q8WUM9	0.156484	-0.0485049	-0.0126431	0.0314044	-0.13344	0.00306814	-0.0932603	-0.00307468	-0.24551	0.0952797	-0.0481587	0.0581254	0.158373	-0.0171724	0.018874	0.0244923	-0.0365117	0.00820616	-0.0221892	-0.00379833	0.095037	0.21103	-0.007283	0.0383299	-0.0593844	0.0329267	0.00378835	-0.0353913	-0.0636766	0.112216	-0.0187438	0.0233135	-0.00856064	0.0515133	-0.0838189	0.0982128	-0.00788485	0.084411	0.0437975	0.0812739	-0.0393223	-0.00721172	0.0183783	0.0136715	-0.0654358	-0.0267664	-0.0374861	0.00717585	-0.144649
ATP11A_P98196	0.00692347	0.00770823	0.00610851	0.00654352	-0.0640698	-0.110785	-0.0539246	0.0267588	-0.0038039	-0.0970689	0.0037939	-0.0486158	0.106081	-0.0261939	0.0038283	-0.0434402	0.0298311	0.046629	0.0640499	0.135039	-0.0857146	-0.147065	-0.0726353	-0.144134	0.111034	-0.0622211	0.0554144	-0.0214913	0.0498648	-0.102025	0.0211758	-0.0257268	-0.0316005	0.00825594	-0.00830346	0.0780228	0.067405	0.0948814	0.0135212	-0.0335645	0.0187809	0.0176955	-0.0285199	-0.0153075	0.0488026	-0.0396239	-0.0586457	-0.0720623	-0.219474
ATP11C_Q8NB49	-0.00316103	0.0694819	0.0512063	0.0241185	0.0209975	-0.0079371	0.00315412	-0.014929	-0.0230956	-0.0594097	-0.0180375	-0.0521179	0.0581432	0.00745697	0.0344459	-0.0247731	0.0210931	0.0418654	0.00102674	0.0356096	-0.0149173	-0.0706061	0.0340329	-0.0017144	0.0940577	-0.0244793	0.0247592	-0.00774426	-0.0180516	0.0236731	-0.00102747	-0.0649729	-0.0820736	0.0197945	-0.000689909	-0.0122908	0.000934376	0.000689579	0.032502	0.0247274	0.032825	0.0145153	0.00833484	-0.00924347	-0.00917603	-0.0172516	-0.0645934	-0.0165198	-0.0409268
ATP11C_A0A067XG54	-0.00886346	0.0867831	-0.090813	0.199547	0.000672494	-0.0641645	-0.00352136	-0.409413	0.201772	-0.141019	-0.000672807	-0.0105761	0.377465	0.114566	0.0651341	0.0121574	0.0176185	-0.0505469	-0.00129882	0.105647	-0.0806574	-0.233323	0.0422381	-0.169808	0.191354	0.0149218	-0.0603736	0.0783245	-0.0144677	0.00129765	0.0106803	-0.127315	-0.208584	0.00164396	0.194626	-0.00164583	0.0777503	-0.290314	0.17244	0.120835	0.00791118	-0.169795	-0.0298306	-0.179824	-0.00863133	-0.0791578	0.00674857	0.028837
ATP11B_Q9Y2G3	-0.0146081	0.0247227	-0.0389028	0.0672392	-0.0359709	-0.000750723	-0.0716023	0.00737228	-0.0977529	0.0318381	0.000750333	0.00732181	0.0426395	0.00625007	-0.00530031	-0.00894756	0.050715	0.0379026	0.0689427	0.0529572	-0.178688	-0.198965	-0.170052	-0.247407	0.0496506	0.113034	0.0650378	0.0561743	-0.167921	-0.0461232	-0.147575	-0.0389253	-0.0297058	-0.0168996	-0.0389668	0.0253799	0.0362138	0.0238952	-0.00333916	0.0353298	-0.0387797	0.0544512	-0.0363846	0.0546666	-0.0324976	0.00333145	-0.024959	0.0174855	-0.197837
AP3M1_Q9Y2T2	0.0642876	0.0227081	0.0851278	-0.0297984	0.0146881	-0.00363336	-0.0061047	0.02264	-0.0377378	-0.043364	0.00362424	-0.0393224	0.0234231	-0.0114041	0.0279427	-0.0231486	0.0584152	0.00726119	0.0457583	0.0668351	-0.0248627	-0.101891	-0.0339881	-0.0552457	0.0169281	-0.0208468	0.0911136	-0.00729792	-0.015902	0.0165816	0.0393319	-0.0376076	-0.0282312	-0.054163	-0.00319646	0.018172	0.0291275	0.0133885	-0.00667918	-0.0201895	-0.0373093	-0.0274906	0.0031894	0.0429807	0.017295	0.0217271	0.00541284	-0.0182637	-0.117465
AP3M2_P53677	-0.00265244	0.10783	0.0102738	-0.0442509	0.188136	0.0111384	0.00264758	-0.158872	0.193231	-0.0389425	-0.0589265	0.022954	-0.0536904	0.0140661	-0.0167112	-0.0986122	-0.0121415	0.0276639	-0.0358938	0.140271	0.0465447	-0.0401815	0.108963	-0.0993888	0.0278217	-0.0829536	0.110571	0.0470609	-0.0956829	-0.131381	0.0120401	-0.0455087	-0.0833297	-0.00625819	-0.0711743	0.13426	0.0209031	0.00623116	-0.0933921	0.101728	-0.174724	-0.304593	0.00632727	0.0253746	0.0575351	-0.0845989	0.0333514	-0.0802454	-0.0169089
ASB6_Q9NWX5	-0.0288786	0.120045	0.0814761	0.137242	-0.0488742	-0.00924018	0.0511296	0.198585	-0.0453195	-0.0647137	-0.0598877	0.0493655	0.0021776	0.0224095	-0.0779246	-0.0021809	-0.0948423	-0.0635715	-0.0208042	-0.0358153	0.177198	0.18644	0.189561	-0.00322218	0.147066	0.003215	-0.0280851	-0.101555	0.106382	-0.0503902	0.0858106	0.108501	0.0416384	-0.092544	-0.0714012	0.0211021	0.0331399	-0.0173026	-0.0312513	-0.068479	0.0919447	-0.0709931	0.123887	0.0741369	0.0348743	-0.00384684	-0.0177099	0.00383661	-0.421577
WBP2_Q969T9	-0.0553143	-0.0457059	-0.0309427	-0.00536054	0.0053407	0.0537867	-0.0257031	0.0443134	0.0310949	0.0779986	0.0092965	-0.048099	-0.0198184	0.0694048	-0.0260542	0.0819768	-0.0883089	-0.0626989	-0.112977	-0.113177	0.126369	0.184203	0.114393	0.128458	-0.0434765	-0.011975	-0.0508221	-0.0426562	0.0527652	0.0391379	0.0118764	0.0585613	-0.0597217	-0.0508916	-0.00477762	-0.0246645	0.00102717	0.0390433	0.0079231	-0.0010279	0.0291049	0.0821408	0.0451548	0.0243865	-0.0197386	0.0287692	-0.0544898	-0.00908429	-0.165966
CYHR1_E9PJD7	-0.174626	0.00451772	0.0988811	-0.00453191	-0.0271575	0.0437852	0.0679013	0.0590952	-0.0620303	0.166506	0.123816	-0.00556779	0.0291075	-0.0913072	-0.0403519	-0.0177567	-0.0581636	0.000945154	-0.0509765	-0.00868338	0.0651286	-0.069121	-0.000945773	0.0110221	0.0103743	0.00485338	0.0055337	-0.0145958	0.0630542	-0.032849	0.0445181	-0.0351737	-0.174796	-0.124391	0.0845421	-0.0195503	0.0332999	-0.112169	-0.0612428	-0.000231466	0.147439	-0.000449078	0.0777969	-0.0351915	0.000231429	0.0415585	0.0296563	0.01123	1.91648
PRKRA_O75569	-0.0370529	0.00733033	-0.0873699	0.0032803	0.0652231	-0.0721729	0.0574427	-0.00328778	-0.0889394	0.0819982	0.12974	0.0308821	-0.0658276	0.0625658	-0.0313478	-0.0551962	-0.0104365	0.0338193	0.0364648	0.027217	-0.00892454	0.00886967	-0.0223179	-0.0124201	0.0125794	-0.0454447	-0.0971952	-0.0905107	0.0191213	0.0526839	0.062272	-0.0149493	0.0411057	-0.0329744	0.0755202	-0.0174072	0.0104566	-0.0112675	0.0207834	0.039587	-0.0167232	-0.00348549	0.00347709	-0.0223144	0.0541123	0.00417656	-0.0306325	-0.0450865	-0.0879043
CCAR2_Q8N163	-0.00833718	0.0248641	-0.0225844	-0.0720695	-0.0638242	-0.0591418	0.0103516	0.000584893	-0.00058513	-0.0220382	0.0107076	0.00951835	0.00706373	-0.00551469	0.0181199	0.0328358	-0.0483717	0.00307349	0.0181426	0.101033	-0.0655094	-0.049399	-0.0142564	-0.00308005	0.0242992	0.0400372	0.0364354	0.0795622	-0.0319122	0.040672	-0.0743912	-0.0296509	0.00417408	0.0235011	0.0345357	0.00170116	-0.00703149	-0.0232057	-0.00111183	-0.00257566	-0.0873299	-0.050765	-0.0341018	-0.00498407	0.00473323	0.00111098	0.0167596	0.00386463	-0.0452683
CCAR2_G3V119
MTA2_O94776	0.134908	-0.0247379	0.0937226	-0.0419674	0.0537244	-0.0198357	0.0490797	-0.0196975	0.0216806	-0.0386859	0.0286427	-0.0523003	0.01262	-0.0127314	0.0127346	-0.0416273	0.0790744	-0.00225239	0.0899879	-0.0474816	0.00898145	-0.0504123	0.0434236	-0.0181301	0.00500325	-0.0662174	-0.00464739	-0.0615317	0.0596108	0.00224888	0.0434371	-0.0332667	0.0900324	-0.0060494	0.0880968	0.00480175	0.0355737	-0.0348767	0.0384475	-0.00747716	-0.00100667	-0.0379882	0.00100596	-0.0202012	0.0632237	-0.0326035	0.0564423	-0.0204309	-0.0367136
MTA1_Q13330	0.0749732	0.0129862	0.0594322	-0.0432549	0.00312088	-0.00296122	0.00295516	-0.0235182	0.0796452	-0.0335452	0.00674594	-0.0795007	0.0500164	-0.040415	-0.00382823	-0.0323723	0.0271463	-0.0642296	0.0388467	-0.00447593	0.0526274	-0.026722	0.035297	-0.0338592	0.0070765	-0.129232	-0.0634653	-0.0710488	0.0600917	-0.0360286	0.00881528	0.00446209	0.143497	-0.0651547	-0.00561127	0.015648	-0.0086873	-0.109759	0.0102875	0.0257501	0.0062534	-0.0524023	-0.0247484	0.00398947	0.12495	-0.015218	-0.00210513	0.00210207	-0.12067
MTA3_Q9BTC8	0.133575	0.0203121	-0.00383898	0.0371309	0.0544352	-0.00271544	0.0491542	-0.143869	0.00271034	-0.0993219	-0.00671166	-0.148381	-0.037876	0.0263853	0.0324399	-0.128367	0.0409039	0.00358936	0.0808721	0.0216127	0.00739722	-0.0407051	-0.00532879	-0.0382758	0.0262895	-0.220053	-0.000632993	-0.025332	-0.0232692	0.0210446	0.000632715	-0.0333001	-0.081549	0.0440522	-0.025249	-0.00819635	0.0103617	-0.00803003	0.00798558	0.0631135	0.0470635	-0.0563693	-0.010314	-0.0755383	0.0592825	-0.0304996	0.0532756	0.00910908	-0.0954415
EIF3B_P55884-2	-0.00225151	0.0449126	-0.00345545	0.00890804	0.00205917	0.0101727	-0.000307918	0.000307853	0.0380644	-0.0218118	0.0218072	-0.0106189	-0.01528	0.0296955	-0.00413296	-0.0529008	0.00454079	-0.0305705	-0.0239569	-0.0122171	-0.00321158	0.00320444	0.00413611	0.0367487	-0.0197563	0.00602748	-0.039666	-0.0295838	0.00835669	0.0187452	0.0134426	-0.0142141	-0.0100382	0.0274164	0.00909369	0.00905472	-0.013689	0.021196	-0.0121764	-0.020417	-0.0480453	0.0315763	-0.0572832	-0.00355949	0.0132518	-0.0181194	0.0053142	0.00355072	0.070036
EIF3B_C9JQN7	0.0311912	-0.313607	-0.0968036	0.108415	-0.141485	-0.031307	0.000393605	0.0171893	-0.12829	0.13215	-0.000393713	-0.110196	-0.0260008	0.00778862	0.0392552	0.0602095	-0.019575	0.140342	0.17482	0.123739	-0.113373	-0.129622	-0.0384017	0.00926102	-0.00932086	0.0645003	0.17528	0.142391	-0.155554	-0.0441918	-0.113978	0.0365756
ALDH16A1_Q8IZ83	-0.0422261	-0.0426273	-0.0309557	0.00314871	-0.0753143	0.0196896	-0.0503354	-0.00685649	-0.00566191	0.0853127	-0.00251815	0.0225086	0.0267551	0.00251376	0.0233775	0.0500327	-0.0239184	0.00725415	-0.0160444	0.051567	0.00617581	-0.0684783	-0.0712558	-0.00273176	0.0310309	0.0894641	0.00272659	0.0466166	-0.0314657	-0.111779	-0.0492056	0.00739863	-0.0959166	-0.0428885	-0.0123327	0.003289	0.0132928	0.0157893	0.000805388	0.015023	-0.0695217	-0.000805838	-0.0273617	0.0342613	0.00449359	0.031005	-0.0444827	-0.0279209	-0.0205698
BMS1_Q14692	0.205885	0.114473	0.0980442	0.155947	-0.0711922	-0.0333662	-0.0192783	-0.0523803	-0.055587	-0.00839777	-0.0287358	-0.0627282	0.0851443	0.00834917	0.151592	0.0393043	-0.0125382	-0.0223758	0.0508759	0.0397344	-0.0274634	-0.0800295	0.0124302	-0.0489334	0.0641618	-0.0529681	0.0377229	0.0479445	-0.0750185	0.0178103	-0.048857	0.0165351	-0.0533286	-0.00357356	-0.0315599	0.0122253	-0.0481682	-0.0231721	-0.0558245	0.0484815	-0.0382225	-0.00217174	0.00216848	0.0110849	0.00429917	0.0225512	0.0104249	0.00335745	-0.117581
MAP1B_P46821	0.00171744	0.0242517	-0.027355	-0.00488668	0.00601305	0.0124669	0.000183492	0.00853243	-0.0289744	-0.000183515	-0.00379624	-0.0113537	0.00628656	0.0329616	-0.0075874	-0.00389112	-0.0512511	-0.0123206	-0.0786212	-0.0159009	0.00964144	0.0365274	0.0145032	0.0507701	-0.0162207	-0.00281878	0.0101527	0.0118615	-0.0232219	-0.0122019	0.00281328	0.0239964	-0.0321454	0.0273964	-0.000111953	0.0189672	-0.00317151	0.0342898	-0.001195	0.00215311	-0.00981205	0.0462472	-0.0171232	0.0053141	-0.0184061	0.000111944	-0.023873	0.0236592	-0.0793478
MAP1A_P78559	0.0248388	0.0130536	0.00204991	-0.0128909	0.0184614	-0.00331809	0.016034	0.0296985	-0.086716	-0.00373469	-0.007522	-0.00597018	0.0441105	-0.00780517	-0.00205282	0.0387285	-0.0208213	0.00252476	-0.00428108	0.0130833	-0.0296674	0.0316852	-0.0106749	-0.0120292	0.00727626	0.000123515	0.0238627	-0.000123526	-0.0270984	0.0137398	-0.0227902	0.00357075	-0.0310196	-0.0109482	0.00414065	-1.61616e-05	0.0282151	0.00650305	0.006241	1.61615e-05	-0.0048103	-0.0183978	-0.00216034	0.010467	-0.0204712	0.000519385	0.019333	-0.00374047	-0.118778
ADK_P55263	-0.0159502	-0.0379201	-0.0633837	-0.0442465	0.217965	0.120036	0.0176413	-0.0885091	0.291966	0.292424	-0.0763316	-0.0825192	0.026686	0.0904767	0.0157757	-0.0726221	-0.110405	-0.119922	-0.0765402	-0.0518667	0.00623598	0.0818391	-0.00626305	-0.00858435	0.150973	0.158923	0.516194	0.548764	-0.1117	-0.155299	0.265574	0.226469	-0.0721998	-0.0162278	0.0299534	-0.040637	0.0568582	0.0609584	0.0288373	0.056231	0.401577	0.524287	0.00732678	-0.00736418	-0.0278257	-0.0448389	-0.0541904	-0.0628639	0.199042
ADK_A0A5F9ZH76	0.244114	-0.0993671	-0.10009	0.0617563	-0.095945	-0.0525168	0.201342	0.19342	-0.0432052	0.337383	0.030317	-0.0309678	-0.0317535	-0.240042	0.228891	0.108075
PDIA5_Q14554	-0.0238116	0.0364056	-0.0189752	0.00758134	-0.00838018	-0.0297286	0.00143462	-0.00143605	0.0531613	-0.0738733	-0.0123244	0.0152738	0.0058127	0.0159495	-0.00485647	0.0322256	0.0349456	0.00321669	0.0247061	-0.0182307	-0.0274278	-0.112321	0.0361952	-0.0113856	0.0109873	-0.0317736	0.0185067	0.0346663	-0.00121316	0.00121214	-0.0175881	-0.0228067	0.00476888	0.0262716	-0.00309784	-0.013109	0.0249658	-0.0178346	-0.038471	0.0349716	0.0747948	-0.0399768	-0.0344926	0.0118127	0.00446755	-0.0396873	0.0030912	-0.0445034	0.232781
HERC1_Q15751	0.00792895	0.0247889	0.0314475	0.0237048	-0.0355625	-0.0455662	-0.0241477	-0.0214213	0.0116437	-0.09316	0.00846447	-0.00661952	0.0100081	-0.0488195	0.00658929	-0.0460723	0.0136286	-0.0123465	0.0240331	0.0165872	0.0128692	0.0190242	0.010616	-0.0491981	0.0230006	-0.028038	-0.0373588	-0.0229592	-0.00213168	-0.0249272	0.00212853	-0.00960529	-0.0623653	-0.0210499	0.00271445	0.0189107	0.0333244	0.0234241	-0.00407839	0.0217088	-0.0080908	-0.013136	-0.0270621	-0.00233453	0.00233076	0.0116323	0.00759701	-0.0345131	-0.105159
ERCC6L_Q2NKX8	0.0444573	0.0132793	0.0234546	0.00273053	-0.00273571	-0.0260087	0.0392392	0.0479189	-0.0638651	-0.0484211	-0.0198298	-0.0148642	0.0414756	-0.053896	-0.0261823	0.003625	0.00723633	0.0326735	-0.0263395	-0.0270955	0.0375315	0.0640194	0.0539164	-0.00567556	-0.032299	-0.119035	-0.103049	-0.0448294	0.018881	0.0478699	0.00565332	-0.0247562	0.0729758	-0.0321046	0.0323344	0.0116149	0.000929559	-0.0696324	-0.00434934	0.00892639	-0.000930158	-0.0283299	-0.0240613	-0.013804	0.021668	0.0245935	-0.00219438	0.00317323	-0.169819
GON4L_Q3T8J9	-0.127209	0.0258299	0.0353984	0.158966	0.0014071	-0.0805716	0.00210783	-0.00140847	-0.0930224	-0.046797	-0.0628103	-0.08432	0.0399783	0.0149373	-0.0650852	0.116989	0.4128	-0.0597918	-0.0881751	0.109065	-0.185268	-0.0223565	0.041052	-0.173914	-0.0617609	0.00776	-0.12139	0.902475	0.472167	0.459021	-0.00780197	0.0463785	0.00438401	0.0595773	-0.00182551	0.082851	-0.0448281	-0.0452947	-0.0380045	0.000804061	0.0722986	-0.0214919	-0.00080451	0.014205	0.0276253	-0.0225675	-0.0348448	0.00128836	-0.182894
YY1AP1_Q9H869-9																	-0.0450205	-0.145129	-0.129075	-0.262766	0.262935	0.411784	0.262176	0.36978	-0.184304	-0.0395561	-0.111808	-0.0626033	0.17007	0.21561	0.110737	0.0385004	-0.0159177	0.00157886	0.148081	-0.0446526	0.0877427	-0.00441161	-0.0211832	-0.538452	0.259133	-0.00158059	0.0776809	0.31779	-0.193145	0.410586	-0.0695424	0.252541	0.00046019
BCL9_O00512	-0.199037	-0.0354221	0.108137	-0.0491989	-0.0228977	0.026957	-0.0399989	0.28672	-0.0762053	0.215791	0.228416	0.02254	0.366459	-0.10634	-0.138211	0.223986	0.0694379	0.17058	-0.0803649	0.133871	-0.102058	0.0155105	-0.170485	-0.00177282	-0.10111	-0.0570781	-0.079991	0.242676	0.248831	0.00177064	0.101586	-0.20267
DHX9_Q08211	0.0117798	0.0261907	0.00962762	-0.0219451	-0.00158194	0.00158021	-0.00362206	0.0180687	-0.0197407	-0.0268092	0.00683281	-0.00264911	0.0432927	-0.0125924	0.0126256	-0.0144241	-0.00137369	-0.00609445	0.00838717	0.00137239	0.00731585	-0.00392103	0.0476446	0.0148671	-0.014396	-0.0449254	-0.0464548	-0.0459893	0.0171279	0.0590699	-0.00947589	0.0254505	0.0436471	-0.0369898	0.0409871	-0.000589556	0.0378292	0.00849058	-0.00131585	0.0161431	-0.000478563	0.0172033	-0.00454929	-0.00190826	0.0383222	0.000478404	-0.00937352	-0.0574151	0.148861
PTMA_P06454	-0.0206961	0.02834	-0.0373399	0.0725742	-0.0202035	-0.00839802	-0.0108637	0.0474734	0.06342	0.0529505	-0.00828869	0.00505509	-0.00507287	0.0342944	-0.00846549	0.0380477	-0.133775	-0.30849	-0.438658	-0.310465	0.533091	0.605482	0.511274	0.497972	-0.382956	-0.29161	-0.362967	-0.191901	0.360358	0.122416	0.239615	0.148456	-0.0376378	0.0448111	-0.0149721	-0.0359486	0.00737296	0.0104186	-0.10214	-0.019316	0.122273	-0.0101334	0.0125961	0.000860119	-0.0886853	0.080281	-0.000860632	0.0121627	-0.160216
PTMA_P06454-2	-0.102739	0.0464027	-0.202894	0.022595	0.0544192	-0.160339	-0.0366074	0.00495076	0.0895157	-0.128554	0.035122	-0.00531619	0.0709288	0.125111	-0.00496781	-0.100617
SPG7_Q9UQ90	-0.0601924	-0.0827005	0.169744	0.092701	-0.0179952	0.0822209	0.0761662	-0.0676384	-0.00604091	-0.104084	0.0506867	-0.129877	0.0924383	-0.0943582	0.0104973	0.00601572	0.115348	0.0386521	0.0200378	-0.0929551	0.134237	-0.0203201	0.135955	-0.126891	0.0730555	-0.0224159	-0.0884388	-0.154892	0.0970732	-0.0721386	0.044004	-0.0243899	-0.0632985	-0.0591706	0.0038759	0.0266447	0.0251417	0.0495073	-0.00388634	-0.0702087	-0.0924749	-0.103337	0.121456	0.0414655	-0.094525	0.00953749	0.0750095	-0.0848165	0.0641006
PACSIN3_Q9UKS6	0.0532116	-0.200413	0.215384	0.323056	-0.0767861	-0.0264992	-0.0202916	-0.126768	-0.217985	0.0205733	0.140128	-0.129615	0.114665	0.0200102	-0.10747	0.31509	0.0526855	-0.0967341	-0.198324	0.144352	-0.130141	0.0371879	-0.103038	-0.203462	-0.0121978	0.169201	-0.347852	-0.149862	0.0794784	0.10129	0.0120956	0.150399	0.061261	0.048192	0.0777609	0.00448516	-0.0243767	-0.000371994	-0.0396211	-0.0284158	0.0544663	0.000371898	0.0448202	-0.245978	-0.212767	0.14161	-0.0217136	-0.0370951	0.00590449
NCKAP1_Q9Y2A7-2	0.0288738	0.0177223	0.0017635	-0.016058	-0.0364984	-0.0335471	-0.00348605	0.0095506	0.0112738	-0.0499885	0.0276357	-0.00176566	0.00461468	-0.0339322	0.0173324	-0.00343052	0.0220114	-0.00588739	0.0074212	-0.018665	0.0372115	0.0202213	0.0400586	-0.0448102	-0.00273197	-0.0295153	-0.0172488	-0.0464421	0.00970651	0.0266005	0.00272681	-0.0254994	0.0220637	-0.0181764	0.0489303	-0.0372585	0.0079263	-0.0588017	0.00633234	-0.0232576	0.0429764	-0.0516837	-0.00636026	-0.0552959	0.0216545	0.00829583	0.0256825	-0.0128593	0.0194939
NCKAP1L_P55160	-0.262066	0.213893	0.0120519	0.250851	0.00748904	-0.00752811	-0.111214	0.153798	-0.0185449	-0.629045	-0.0937921	0.204409	0.17885	-0.182139	-0.505646	0.144981	-0.0456697	0.0405557	-0.0128171	0.0465353	0.0690469	-0.119907	0.0127042	-0.0175968	-0.0144775	-0.150381	0.0146479	0.0350588	0.027915	-0.0178134	0.0257744	-0.0925946	-0.157033	-0.0730275	0.0711275	-0.0610076	0.00385148	0.0365724	-0.186862	0.0212446	0.0735867	-0.142421	0.0466834	0.0787125	0.043841	-0.165654	-0.00386179	-0.173577	-0.099781
GTF2H3_Q13889	0.00174687	0.0427264	0.0589113	-0.0470781	-0.154001	0.00816655	0.0743243	0.00642399	-0.00174898	0.00428085	-0.0509361	-0.078616	-0.0278515	-0.00388346	-0.0438447	0.0197111	0.0452869	-0.0260894	0.00678854	0.0663703	-0.0481658	-0.103049	-0.0608134	-0.0744168	0.0925732	-0.0281307	0.0141609	-0.00682064	0.0130302	-0.0538317	0.00741622	0.0488315	-0.0256966	-0.0162675	0.0205257	0.0826209	-0.021265	0.00644815	0.00317119	-0.0484358	0.00443864	-0.00317818	0.0876458	0.0531115	0.0495394	-0.0445463	-0.00356263	-0.0259883	-0.297226
WNK4_Q96J92	0.106543	0.0168402	0.154855	0.0627336	-0.0762412	0.0241981	-0.00432346	0.00431054	-0.0714071	0.0235735	-0.0407461	-0.00691054	-0.0293446	-0.119276	-0.0725892	0.174152	-0.0837969	-0.0872762	-0.0939347	-0.114967	0.251961	0.558321	0.289213	0.127942	-0.223684	-0.296656	-0.271642	-0.237799	0.178461	0.2305	0.164331	0.0791957	0.059286	0.0848372	0.121911	-0.00935468	-0.0235554	0.00956512	-0.00346792	0.00455341	0.0919286	-0.221545	0.0034596	-0.100575	-0.111026	-0.0610415	0.0894999	-0.147088	-0.100484
WNK1_Q9H4A3-7	0.0269491	0.0379766	0.0272898	0.0146552	-0.0153808	-0.0238675	-0.00277138	0.0107375	0.00276606	-0.0521749	-0.0216413	-0.0294611	-0.0104916	-0.0220548	0.0660821	0.0895048	0.0086044	0.000755328	0.0210547	-0.0114289	0.015159	0.0654454	0.0381953	-0.00297774	-0.000755723	-0.0251691	-0.0159914	-0.0451168	-0.00530072	0.0411894	-0.00425364	0.0279504	-0.0290857	0.0108845	0.043203	0.078629	-0.0339673	-0.0389059	0.0199597	0.0420976	0.0594401	0.108668	-0.0433392	-0.00584197	-0.0661676	-0.0819865	-0.0213712	0.00581841	-0.0578518
WDR70_Q9NW82	-0.00734077	-0.0134889	0.00866555	-0.0437881	0.00944815	-0.000823555	0.000823085	-0.00169729	0.0255244	-0.0350609	0.000853091	-0.011155	0.0663497	0.0263569	0.0746499	-0.0135961	-0.00904556	-0.0804497	-0.0448454	-0.089985	-0.00365472	-0.0405065	0.0117407	0.0514155	-0.0497997	0.0373875	0.100737	0.00364548	0.00806397	0.0189477	0.0395732	-0.0141231	-0.0331786	0.0230719	0.00968445	0.0452693	0.0197976	-0.0129085	-0.0158336	-0.0313483	-0.00640329	0.0137094	-0.0138852	-0.01767	-0.0116112	0.0155703	0.006375	0.0141074	0.202301
NUF2_Q9BZD4	0.0851609	0.00886214	0.0785412	0.0178385	0.0209029	-0.0764825	0.0253053	-0.00891692	-0.120887	-0.0538741	-0.0253283	0.0209665	0.0137325	-0.0730223	-0.0401117	-0.0645392	0.0610549	0.0113074	0.0931226	0.0125039	-0.0164412	-0.121687	0.0294835	-0.0762022	-0.0613898	-0.140552	-0.0774843	-0.129393	0.013485	0.0192057	-0.00488351	0.00486703	-0.0149074	-0.015389	-0.00518848	0.0388416	-0.0473202	0.00968682	0.0442306	0.0207225	-0.0299011	-0.0583851	-0.0215479	0.00813772	0.0576455	-0.0436302	0.0495973	0.00516989	-0.032568
CLTA_P09496-2	-0.341275	-0.0573703	0.00144251	0.0784363	-0.00144396	0.0464375	0.0509837	-0.151213	-0.160315	-0.0675694	-0.149152	0.00721425	0.0926098	-0.102339	0.0799608	0.160249																	0.0361221	0.0189041	0.0913899	-0.0795334	0.0181729	-0.236122	-0.114746	-0.00640086	-0.0633647	0.111244	-0.000396915	0.00865645	0.000396806	-0.0158481	-0.0445286	0.0153426	-0.257484
CLTA_P09496	-0.524084	-0.124427	0.0851971	0.24245	-0.132515	-0.0241	-0.013626	-0.191403	0.0211246	0.0169998	0.023449	-0.0521803	-0.116206	0.0134985	0.158079	0.14029	0.00060969	-0.0322855	-0.0289618	-0.00223387	-0.0183776	0.0549764	-0.0612224	0.107762	0.00498218	0.121904	-0.00265115	0.0245131	-0.000609947	0.0545687	-0.00886201	0.073444	-0.0471644	-0.0638483	0.00619364	0.0220935	-0.0341955	0.0723868	-0.0357628	0.0190568	-0.00622035	0.132618	-0.0379946	0.010138	-0.0248909	0.0878649	-0.0409082	0.0848131	0.0377468
TBC1D8B_Q0IIM8	-0.402042	-0.110075	0.164763	0.0507034	-0.0846215	-0.0589286	0.0463734	-0.20168	-0.116497	0.177103	0.0132224	-0.0124709	-0.184366	0.012364	0.0587793	0.0287639	0.00242526	-0.00242934	0.0815816	0.113286	-0.295939	-0.319281	-0.339454	-0.118929	0.123203	0.260573	0.181086	0.170708	-0.227574	0.0247478	-0.237225	-0.0307769	0.0193823	-0.00151121	-0.00432064	-0.079096	-0.136628	0.15058	-0.109819	0.0150943	-0.069695	0.0895065	0.10431	0.0513109	-0.0280922	0.00150963	-0.0090702	0.0212701	-0.046662
PSAT1_Q9Y617	-0.0508193	0.00401212	-0.00159105	-0.107203	0.0294225	0.00100842	0.00838278	-0.0301202	0.127497	0.111758	0.0149083	-0.0080567	-0.00100912	0.0235208	-0.0378776	-0.0589763	-0.0160825	-0.00354953	-0.0335609	0.00829527	0.00213062	0.0292931	0.0170388	0.0370801	-0.00213377	0.0299081	-0.0193326	0.00669605	-0.0174487	-0.0181124	-0.0204787	0.00653696	-0.0844372	0.0536187	-0.0493181	0.00383656	-0.0150804	0.00571352	-0.028508	-0.0100776	0.00595114	0.0437763	-0.0229007	0.000665796	-0.000666104	0.0189353	-0.0122976	0.0235573	0.272276
TXNDC15_Q96J42	-0.0863328	0.10443	0.024091	0.0288828	0.0519131	-0.0942285	0.11458	-0.138639	0.0492815	-0.191947	-0.0538199	-0.0245001	-0.0762745	0.0845491	0.0369	-0.155352	-0.0425118	-0.0363518	0.00590443	-0.0126914	0.0110114	-0.0681759	0.0499889	-0.0221996	0.00994281	-0.0059287	0.00939904	-0.033706	0.00654149	0.0779074	0.00916036	-0.0271926	-0.0683406	-0.076484	-0.0317307	0.0280743	0.0955533	-0.0015033	0.038104	0.0496498	0.0636588	0.00150174	-0.00191956	0.044884	-0.00706793	-0.180332	0.0828643	-0.0212288	-0.145053
GSTCD_Q8NEC7	0.0533313	0.00684243	-0.07043	-0.00687504	0.0271004	-0.0580634	0.054881	-0.150685	-0.0814485	-0.0236605	0.0495052	-0.10362	0.0319915	-0.127177	0.0527885	0.0621006	0.212233	0.0836743	0.0892616	-0.0696109	-0.00742364	-0.101699	0.00515891	-0.120404	-0.0240566	-0.00517742	0.0305442	0.0415021	-0.00698012	0.0202256	0.0799193	-0.0207463	0.000214892	0.0629711	-0.0750822	-0.121886	0.0400967	0.139214	0.0571285	0.0114594	-0.000214924	-0.00545195	0.0291303	-0.0560416	-0.157146	0.0477352	-0.0248631	-0.0544057	-0.164656
PTMS_P20962	0.00584158	0.0163748	-0.0751553	0.0690272	-0.0311291	-0.00586533	-0.0630798	0.0710157	-0.0290449	-0.059478	-0.035832	0.0314886	0.0466156	0.0265665	-0.0486069	0.0981412	-0.0464913	-0.0112577	-0.0786197	-0.0335673	0.0230746	-0.0118466	-0.00254797	0.0337878	-0.0288411	0.0517339	0.0157297	0.0351495	0.00254348	0.0114225	-0.0471687	0.0416832	-0.0937619	0.00709897	0.0153928	0.0253827	-0.0198669	0.0191209	-0.0148471	-0.0169623	0.00648306	0.0037312	0.0379692	-0.0144295	-0.00374088	0.0307045	-0.0152087	-0.0197241	-0.236834
PTMS_F5GXR3
PPIL2_Q13356	0.101457	-0.0125388	0.101801	-0.0327756	0.00357474	-0.0315643	0.0109768	-0.000124458	0.024497	-0.0692408	0.037849	-0.041006	0.080507	-0.00947795	-0.00503066	0.000124447	0.078269	0.000900849	0.137121	-0.0287144	0.0179496	-0.0646491	0.0458504	-0.0677231	0.0905266	-0.0584775	-0.000901411	-0.0378109	0.0853636	-0.0631097	0.0422806	-0.0539892	0.0104163	-0.114949	0.0742336	-0.081867	-0.0104921	-0.0826112	0.0394511	-0.103095	0.181851	-0.0538385	0.135662	-0.0232071	0.0840727	0.0800797	0.0607163	-0.0938248	-0.144451
NXT2_Q9NPJ8-3																	-0.0326325	-0.0691741	-0.238964	0.266008	-0.323245	-0.126363	0.11399	-0.317672	0.0369502	0.0495014	-0.00183112	-0.162536	0.137373	0.0018288	0.179318	0.0539592
NXT1_Q9UKK6	-0.378369	-0.233497	0.395299	0.35815	-0.2317	0.0903679	0.343818	0.387712	-0.607718	-0.12762	0.351728	-0.0863214	-0.0787987	0.212117	-0.066598	0.0636589	-0.419298	-0.0119958	0.231616	0.23147	-0.042968	0.442673	-0.204016	0.0531277	0.0060032	0.143102	0.32671	-0.00602829	-0.252199	-0.0533769	-0.0280865	0.0155428
MTHFD1_A0A384N5Y3	0.0861636	-0.0236327	0.0817635	-0.0482906	0.0518096	-0.0582567	0.0620597	-0.0658939	0.0232518	-0.105523	0.0851928	-0.0277995	0.0395344	-0.0448766	0.0589342	-0.0861745	0.0461572	-0.0415598	0.0202722	-0.0709889	0.0344314	-0.0177966	0.110957	-0.0306718	0.00828275	-0.114487	-0.0472102	-0.127121	0.0966109	0.0457388	0.0807973	-0.00833058	0.0904299	-0.00276072	0.0608278	0.00275544	0.0428244	-0.0121668	0.0396681	-0.0626781	-0.0452377	-0.11695	0.0416062	-0.0375356	0.0632751	-0.0282412	0.00663736	-0.0712316	0.00676611
MTHFD1L_B7ZM99	0.0268881	-0.0510573	0.0158673	-0.0825853	0.00829011	-0.080025	0.0992947	-0.049625	0.00452914	-0.111958	0.0708673	-0.0045434	0.0339039	-0.111212	0.0189472	-0.0874864	0.0675152	-0.0350321	0.0339039	0.00228076	0.0480461	-0.0748962	0.0904753	-0.0561499	0.0249671	-0.136189	-0.0121496	-0.0658938	0.100951	-0.00228437	0.0725898	-0.0149397	0.0766475	-0.0398583	0.068884	0.0230788	0.0888316	-0.0359752	0.0271611	-0.018887	-0.0404946	-0.0810005	0.0186429	-0.0376807	0.0958492	-0.0467969	0.0442946	-0.0565689	0.00185649
ZMYM2_Q9UBW7	0.217241	0.152615	-0.0245997	-0.0074956	-0.198938	-0.0959418	0.113805	0.0255201	0.0051824	-0.0528291	0.0678722	-0.111336	0.117854	0.0928695	-0.00520108	-0.0521951	-0.00437903	-0.167274	-0.10616	-0.0612798	0.0465823	0.00436578	0.0571732	0.139634	0.120117	-0.511308	-0.524303	-0.133611	0.333668	0.03307	0.282621	-0.131288	0.0427064	-0.00590475	0.0322713	0.0386041	0.00622855	0.0497842	-0.00457384	0.0408175	-0.0269113	-0.0197733	-0.0316489	-0.00950688	0.054001	-0.0240598	0.00455938	-0.0403224	0.122684
PDCD6IP_Q8WUM4-2	0.0613586	-0.000359088	0.0607479	-0.076571	0.0270347	-0.057896	0.0649858	-0.0723879	0.0652095	-0.0763781	0.033221	-0.073872	0.000358999	-0.0393454	0.0249667	-0.0940414	0.0642837	-0.0272984	-0.000467991	-0.0367816	0.0898809	0.0525451	0.0902966	0.0516223	-0.0063377	-0.100713	-0.0740792	-0.106372	0.11173	0.000467839	0.0872907	-0.0203254	0.059208	0.00767697	0.0516939	-0.00754804	-0.00709637	-0.0117502	0.0438865	-0.0225142	-0.0388552	-0.0450436	0.00706164	-0.0469807	0.0631246	-0.0229072	0.0785229	0.013708	0.0585709
PDCD6IP_Q8WUM4	0.272108	0.0118844	0.25211	-0.0862882	-0.0526623	-0.0119832	0.133679	0.0391868	-0.118256	0.0121543	0.105066	0.111267	-0.0270858	-0.126715	-0.0534088	-0.058415	0.15194	-0.112997	0.103621	-0.0804906	0.0179211	-0.163746	-0.0894908	-0.122479	-0.00411479	-0.0658302	-0.0291001	0.00410308	0.155958	0.0132529	0.0810237	0.0180624	0.0878835	-0.0606359	0.103006	-0.00532617	-0.0415409	0.049716	-0.041389	-0.0946425	0.00530658	-0.0514906	0.010154	-0.0943297	0.0525321	0.034337	0.0320153	-0.0234594	-0.00616211
6-Mar_O60337	-0.001858	0.412027	0.168689	0.297023	0.146926	0.0321223	-0.509262	0.126204	0.00185561	-0.212575	-0.0749318	-0.32992	0.0731246	-0.610589	-0.344149	-0.445626	0.0693136	-0.0240124	0.00989736	-0.0191694	0.00282391	-0.0497088	-0.0131681	-0.133399	0.0426795	-0.0175035	-0.0713643	0.0148902	-0.00282945	0.0616148	0.0851928	0.0555006	0.0583076	-0.485611	-0.367761	0.0297468	0.32127	-0.115704	-0.0689929	-0.190841	-0.271824	0.000125548	0.037112	0.130427	-0.163471	-0.000125559	0.137519	0.0636056	-0.103176
PRKCD_Q05655	0.0650779	-0.0181024	0.106826	0.00767443	-0.0146892	0.0205829	0.0197311	0.0247304	-0.108731	-0.0293237	-0.00933054	-0.011558	0.0320528	-0.0253868	-0.00771547	0.0498976	0.0541227	-0.0143669	0.00572437	0.00804214	0.0267137	-0.00328624	-0.110733	-0.159709	0.0394874	0.00327878	0.0592365	-0.0415324	0.0618055	-0.0162154	-0.0220042	-0.141	0.0125261	-0.0018659	-0.00249802	0.00186349	0.0376135	0.0095841	0.00335347	-0.0141331	-0.0363674	-0.0687928	0.0162777	-0.0221855	0.0276372	-0.0327411	0.0123365	-0.0358266	-0.096449
PRKCA_P17252	0.102382	0.00667226	0.11087	-0.00868158	0.0157472	-0.0584466	0.0271726	-0.0505609	-0.00670326	-0.131934	0.0393081	-0.040294	0.087162	-0.0672095	0.0710553	-0.0417517	0.104337	-0.0131445	0.0130258	-0.171435	0.134548	0.0678776	0.205288	-0.0971751	-0.13741	-0.277413	-0.177496	-0.235703	0.146445	0.0308914	0.108186	-0.039237	0.0204175	-0.0847355	0.0473858	-0.160312	0.066796	-0.180145	0.00259339	-0.0947264	0.0982252	-0.154857	0.0364727	-0.117704	0.0437784	-0.00259806	0.0496902	-0.23733	0.0254077
PRKCQ_Q04759	0.0401106	0.00643988	0.00960481	-0.0147439	0.0187292	0.0077251	0.0157674	-0.0222767	-0.0668684	-0.0073153	-0.00646875	-0.0644388	0.053423	-0.0447488	0.0326807	-0.0108744	0.0706118	0.088109	0.0894149	0.0474833	0.133523	-0.022955	-0.0794977	-0.200923	0.0267594	-0.0396046	0.0225955	-0.0435735	0.0450131	-0.0752436	-0.0518273	-0.073109	0.0586506	-0.0166158	0.00827293	-0.0168453	0.0698105	-0.0255478	-0.00832065	-0.0845656	-0.0605425	-0.161388	0.0165387	0.0323662	0.0749154	0.0158773	0.0735413	-0.0461414	0.666112
PRKCB_P05771-2	0.0132066	-0.0029952	0.00789521	-0.0425703	0.0119179	-0.0055426	0.0108966	-0.0546569	0.0207325	-0.0414724	0.00465239	-0.0116953	-0.0166149	0.002989	0.0429227	-0.0761577	0.0676136	0.0485028	0.0435221	-0.000547171	0.10272	0.0426779	0.000546963	-0.0253036	-0.0449905	-0.10935	-0.0996063	-0.145236	0.0940015	-0.10497	0.0385083	-0.0469654	0.049718	-0.0114726	0.0568918	-0.0711636	0.0649436	0.00040475	0.0166212	-0.0630141	-0.000404863	-0.120068	0.0954842	-0.0360085	0.0915493	0.0489468	-0.00973191	-0.100845	0.351571
HNRNPUL2_Q1KMD3	0.0230744	0.0430055	0.041191	0.0352089	-0.00735636	-0.0489946	0.0263863	0.00492069	0.00749364	-0.0261158	-0.00493753	-0.0656438	0.0515379	-0.0296143	-0.0125463	-0.0247127	-0.00303755	0.0501948	0.0116629	0.0744603	-0.0432355	-0.0142769	-0.00762678	0.00303116	0.0398337	-0.0234858	-0.0243663	0.0136064	-0.0142069	0.0782275	-0.0340963	0.0325461	-0.00479966	-0.0057592	-0.012834	0.00194077	0.00945992	0.0147977	0.0246586	0.0333677	0.00589959	-0.00122442	0.00122338	-0.0183126	-0.0152148	0.0291804	-0.00816082	-0.0516836	0.0630971
HAUS1_Q96CS2	-0.242591	-0.1238	0.115621	0.0476564	-0.100335	-0.0363772	-0.00993456	-0.129174	-0.129347	0.0276502	0.0919364	0.0704575	-0.00176243	0.00176028	0.191065	0.125044	-0.0293473	0.00209254	-0.0587008	-0.0424453	0.0318082	-0.0907687	0.069476	-0.00209558	-0.0861004	-0.0826267	0.0508439	-0.0123558	0.0688615	0.0972248	0.0326593	0.0360653	-0.0464487	-0.0505704	-0.0147264	0.00651838	0.0155778	0.00313595	-0.0599243	0.0613191	-0.0283843	0.0105788	-0.0175483	0.00660319	-0.00281516	0.00280967	-0.0233094	0.0161722	-0.240843
FHOD1_Q9Y613	0.0672582	-0.0111937	0.101829	-0.0180178	0.0186092	-0.0405406	0.0501583	-0.0383715	0.0111075	-0.137083	0.0638051	-0.103572	0.0232574	-0.104697	0.0332289	-0.0305735	0.0471452	-0.0345663	0.0759031	-0.00573214	0.0294655	-0.00388928	0.101497	-0.0681014	0.0575265	-0.0920248	-0.0785654	-0.203292	0.0502961	0.00387883	0.00619082	-0.073984	0.0522142	-0.0467313	0.0237635	-0.0196233	0.0241687	-0.0698313	0.0320915	-0.00250638	-0.00933343	-0.0909593	0.0261704	-0.0145134	0.0556686	0.00250203	0.0324449	-0.019446	0.00379389
SERPINB9_P50453	-0.109447	0.00929119	-0.0458763	-0.0509236	-0.0369224	0.034323	-0.00176317	0.00419864	0.0151984	0.183554	-0.0144986	-0.0189851	0.00176102	-0.0163743	0.0181818	0.057614	-0.0872716	-0.000776685	-0.0768167	-0.0210741	0.0574375	0.041891	-0.0062461	0.0363942	-0.00540152	0.0561689	0.000776267	-0.00194944	0.0119098	-0.0341855	0.00535605	0.0153162	-0.118385	0.0966564	-0.0630882	0.00155096	0.00231255	-0.0192286	-0.013388	0.0307192	0.0203321	0.0332756	-0.00206862	-0.0043036	0.0115282	-0.00669296	-0.00155263	0.048546	0.293144
SERPINB1_P30740	0.0392067	0.0300065	0.0138166	-0.0545177	-0.0157906	-0.0227635	0.0508817	0.0275609	-0.0498129	0.00642794	-0.00300984	-0.0230728	-0.0177174	-0.0110429	0.00300358	0.0278414	0.0377216	-0.00232723	0.00232348	-0.00496707	-0.0129343	-0.0931112	-0.0683658	-0.0121412	0.0118866	0.0424355	0.0197024	-0.00442114	0.0298021	0.0101568	0.0117197	-0.00534657	-0.0174198	-0.0143961	0.0525112	-0.0387037	0.00469494	-0.012497	0.010729	-0.0510486	0.0561618	-0.00471027	0.0381843	-0.00998033	0.0341952	0.0198116	0.0368925	-0.00771606	-0.103038
SERPINB6_A0A087X1N8	-0.0864525	-0.00400152	-0.097255	-0.0178838	-0.0279906	0.00454387	-0.0717816	-0.00865352	0.103342	0.0543673	-0.030863	0.00399045	0.01565	0.0488829	0.0226252	0.0216408	-0.028081	0.011839	-0.101685	0.0140075	-0.0738782	-0.0865637	-0.0406361	0.018869	0.033131	0.0433988	-0.000669222	0.0138045	-0.0943715	0.0262427	-0.0263629	0.000668911	-0.0940421	0.0802667	-0.0965887	0.00839471	0.0132501	-0.00234075	-0.0337188	-0.00903008	0.0301861	0.0322416	-0.017829	0.0205866	-0.0479986	0.0245274	-0.0227762	0.00233696	0.03906
LIMA1_Q9UHB6-4	0.00924814	0.0206488	-0.0236937	0.0482798	-0.0116912	0.000562603	-0.0408839	0.0840287	0.00143144	-0.063533	-0.0324649	-0.00370621	-0.000562822	0.0189314	-0.016547	0.0165052	-0.0255598	0.0157424	-0.0318576	-0.0583499	0.0142086	0.0813054	0.0374501	0.02115	-0.0308772	-0.0565788	-0.0185137	-0.0221554	0.0399737	0.00651757	-0.00654714	0.0290056	-0.0694412	-0.0183035	-0.0316054	0.0455551	-0.00704068	0.0254865	-0.0209101	0.0441243	0.0197653	0.0464866	0.039139	0.0143434	-0.00321496	0.00320781	-0.035902	-0.0432619	-0.177046
LIMD2_Q9BT23	0.210418	-0.198049	0.0153994	0.287129	0.185153	-0.071339	0.00288504	0.0794852	-0.403741	-0.228166	0.0190266	-0.171751	-0.098742	-0.0808442	-0.00289082	0.0675234
MTR_Q99707	0.0113084	0.072346	-0.00157059	0.0462279	-0.000487161	-0.0327941	-0.00048947	0.0287675	-0.0307199	-0.0762393	0.0156879	0.012531	-0.00644103	-0.0419646	0.00966068	0.000486997	0.00778032	0.0495853	0.0371372	0.0408513	-0.075659	-0.103719	-0.0365597	-0.0866823	0.0304489	-0.0475616	0.0331158	-0.0501907	-0.0610565	0.0320686	-0.00782251	0.0102831	-0.0256553	0.0194587	-0.0246922	0.0286532	0.0445066	-0.0200196	0.00958616	0.0180186	0.00900817	-0.0529109	0.0374139	-0.0348087	0.0237181	-0.0185387	-0.00906477	-0.0122042	-0.126228
ZNF131_P52739	-0.116266	-0.0100929	-0.12871	0.0353337	0.214583	-0.130778	0.183059	-0.102673	0.0766405	-0.0480403	0.123253	0.0100228	0.0226068	0.06565	-0.044954	-0.0614342	-0.0887967	0.0702361	0.000148492	0.0903814	0.0190871	-0.107276	0.0988551	-0.134079	0.0281852	0.0798876	-0.0841472	-0.00505206	-0.152506	-0.000148507	0.0142532	-0.00725091	-0.0828628	-0.00803207	-0.0409159	-0.00472286	0.0132395	0.0167644	0.0241665	0.0167189	0.00330923	-0.0477868	-0.0503975	0.0686574	-0.0800005	0.0311207	-0.00223036	0.00222692	-0.171229
PHF10_Q8WUB8	-0.0140839	0.0274134	-0.000704699	-0.0928584	-0.0403777	-0.0141283	0.00943566	0.0276019	-0.123888	0.0103364	0.000704355	-0.0444093	0.0136635	0.0385171	-0.014986	0.0360482	-0.13784	0.0373362	0.0297725	0.0790136	-0.0226606	-0.052516	0.104582	-0.0494096	0.0292035	0.027797	-0.01529	0.000320414	-0.0393169	-0.0158115	0.00500168	-0.000320486	0.159199	-0.0151731	-0.016572	0.0138194	0.068717	0.0193546	-0.0222869	-0.00740087	0.0532089	0.00288579	-0.0907551	-0.00530701	0.0111196	0.00552959	-0.0103435	-0.00289157	-0.208313
AGPAT2_O15120																	0.113787	-0.0438659	0.0487688	-0.00580959	0.00280182	-0.069952	0.0544357	-0.0424908	0.0161125	0.0305996	-0.114523	-0.175571	0.00093686	0.0669267	-0.000937469	-0.0147606																	-0.0158506
VPS18_Q9P253	-0.0221532	-0.0188458	-0.00179989	0.00179765	0.00317242	-0.0368781	0.0172743	0.00953967	0.0100313	-0.129197	0.0130886	-0.0447581	0.0184987	-0.0471213	0.00740518	-0.0205113	0.106043	0.0550674	0.0541011	0.040305	-0.011668	-0.0846994	0.00537368	-0.117383	0.0169766	-0.09795	0.00220381	-0.0668359	0.0307093	-0.00637391	-0.00220718	-0.0296734	0.0158268	-0.082098	0.00285687	-0.0131969	0.0101974	-0.0910007	0.0184851	-0.0432911	0.0350825	-0.0669451	0.0172789	-0.0338887	0.137779	-0.00286254	0.0334199	-0.126096	-0.0377446
MICALL2_Q8IY33	-0.00664217	0.00661173	0.0319843	-0.0337451	0.0241001	-0.026544	0.0254711	0.0257723	-0.0455626	-0.117657	-0.0257083	-0.0404085	0.0283878	-0.0555189	0.0208179	0.0260803	0.0224463	7.95345e-05	0.00836395	-0.036256	0.0298948	-0.0127277	0.0426195	-0.0385675	-0.0108032	-0.0674515	0.0478588	0.0290455	0.00288924	-0.0149715	-7.95389e-05	-0.0221056	-0.0371558	0.00773692	-0.0189242	0.00901819	-0.00313415	-0.0187046	-0.0535664	0.0227402	0.0524846	0.00312736	0.013641	0.00542135	-0.0252871	-0.075493	0.00877532	-0.0167488	-0.186657
MICALL1_Q8N3F8	-0.0445606	-0.00080198	-0.057703	0.0724874	0.0307513	-0.00385219	0.00931828	0.0366381	-0.0973106	0.000801534	-0.0742101	-0.012149	0.0529267	0.00927237	-0.0190345	0.0408825	0.0451771	-0.0173685	-0.0295002	0.000131695	0.037352	0.0150278	0.0200473	-0.0162745	0.0537216	-0.0102838	-0.0287881	-0.0200111	0.0289385	0.00783682	-0.000131707	-0.00567196	-0.0626148	0.045992	-0.034532	0.044877	-0.00680439	0.00518016	-0.00232165	0.0440705	0.00265237	0.00231792	0.106332	-0.00897426	-0.071027	-0.0209579	-0.0366824	0.0153616	-0.132418
VRK3_Q8IV63	-0.00140422	-0.0130336	-0.020056	0.0457549	-0.0204838	-0.0381497	-0.0176253	0.131187	0.0868101	0.0779236	0.0413287	0.00140285	0.1116	-0.0125121	-0.0277695	0.0904135	-0.0145114	-0.0846667	0.00101955	-0.074692	-0.00374375	-0.00102027	0.012185	-0.0268518	0.0931834	0.0330144	0.0200656	-0.0446537	0.0558015	0.0318518	0.075397	-0.0595222	0.0441832	-0.00389017	-0.0201817	0.043016	0.0800621	-0.0226732	0.00387971	0.0199787	0.0150507	0.0719852	-0.0163834	0.117525	-0.00798897	-0.0901513	-0.0293453	-0.0508905	0.190291
FAM98B_Q52LJ0	-0.0101524	-0.0493983	0.00324245	0.0532471	-0.00324975	0.0254714	0.0324521	-0.0242289	-0.028561	0.169526	-0.0124133	0.0266749	0.0509387	-0.0265661	0.0462191	-0.0525543	-0.0267095	-0.0140158	0.0138809	0.0259497	0.0273726	-0.0891843	0.0602013	0.0362697	0.0470213	-0.0190747	-0.0222822	-0.0280973	0.0996113	-0.0438656	0.0660642	-0.0414314	0.0186732	0.16578	-0.0170252	-0.0270387	0.0323595	-0.035378	-0.0167847	-0.0329273	0.0538831	-0.0344653	-0.0543051	-0.0113545	0.0428714	0.0416835	0.0112659	0.0204764	0.376338
FAM98A_Q8NCA5	0.0164351	-0.00322626	0.0124827	-0.0448517	0.00663218	-0.054144	0.0452478	-0.0417841	0.0513808	-0.0276454	0.0364369	-0.0759768	0.0444573	-0.0102348	0.00321906	-0.0697533	0.00609705	-0.0594217	-0.00556019	0.00553885	0.0871639	0.0879961	0.0971794	0.0518152	-0.0419709	-0.11883	-0.0566526	-0.062316	0.0692924	-0.0288612	0.104045	-0.0190454	0.0351328	-0.0766597	-0.0350351	-0.00812658	-8.49906e-05	-0.0484293	0.0296976	-0.0852019	8.49856e-05	-0.0687676	0.104024	0.067941	0.0193956	0.0119156	0.00763558	-0.0982828	-0.0842239
RBM28_Q9NW13	-0.00404521	-0.000830724	0.0247007	0.0031124	-0.000766185	-0.0344369	0.0213134	0.0131345	0.00494792	-0.0840725	0.0118327	-0.0256656	-0.00560079	-0.0111735	0.000765778	0.0135933	0.0212873	-0.00543776	0.0395735	0.00888561	0.00193611	0.0259129	-0.00306487	-0.0070342	-0.0435598	-0.0443839	-0.10826	-0.0707051	0.0117699	0.0682914	-0.00193872	0.0325702	-0.00508978	-0.0294719	0.0502444	-0.0210298	0.00241341	-0.0462726	-0.00241746	0.00463106	0.0399915	-0.0784547	0.0402223	0.00312849	0.0185301	0.0263869	-0.0269348	-0.0348758	0.0352131
USP8_P40818	-0.0135182	0.00302173	0.000352919	0.00069541	-0.0394914	-0.0573303	0.0322553	-0.000353006	0.0240064	-0.0763207	-0.00604289	-0.0624956	0.0296896	-0.0647185	0.0524318	0.0440369	0.0345481	0.00719762	0.0434446	-0.00923179	-0.00462696	0.000873518	0.0678189	-0.0644864	-0.00429713	-0.12234	-0.0488744	-0.105199	0.037038	0.0343236	0.0466584	-0.000874048	0.00519195	-0.0751756	0.0506845	-0.00354317	0.0144847	-0.0605939	0.00340144	-0.0146642	0.0423263	-0.0322062	0.0419266	-0.0319593	0.0221157	-0.00340948	0.0102671	-0.0235324	-0.0742808
RELCH_Q9P260-2	0.0779823	-0.00481148	0.00479549	0.0456549	-0.0467529	-0.0252686	0.0642175	0.0478038	0.0653626	-0.0725367	-0.0096961	-0.0197824	0.110162	-0.0249368	-0.00667786	0.00537149	0.0497876	-0.0314761	0.00679553	-0.0200813	0.0995012	-0.0966088	-0.00742485	0.0254255	-0.0491946	-0.0717674	-0.000413932	-0.0724966	0.0638979	0.0762409	0.0707146	0.000413814	0.0256663	-0.03672	0.0165978	-0.029915	0.0108768	-0.0452789	0.0343463	0.0172856	-0.0609071	-0.139386	0.059414	0.0157518	0.000330598	-0.00317343	-0.000330674	-0.114527	-0.0944163
RELCH_Q9P260																																	0.0612367	-0.125106	-0.302811	0.0320853	0.242813	0.0578808	0.0593035	-0.10283	0.0887569	-0.10969	0.210351	-0.436838	0.260932	-0.0782763	-0.141453	-0.0328152
PIK3CB_P42338	-0.00721057	-0.0151586	0.0110318	0.0118878	0.491748	0.501476	-0.00865175	-0.0998237	0.00717471	-0.0755679	0.420345	0.402698	-0.0426948	-0.0886088	0.0199957	-0.0384312	-0.00267057	-0.0792809	0.0450579	-0.0214717	0.00266563	-0.0421697	0.0730639	-0.0296736	0.473993	0.380739	0.139133	0.0536303	-0.00461743	-0.062238	0.02788	-0.0313608	0.0473058	-0.01488	0.0281656	0.0823197	0.655323	0.634421	0.0235569	-0.0844646	-0.0706295	-0.0727278	-0.034818	0.0078888	-0.00793217	-0.0907815	0.0884828	-0.0183448	0.00856828
PIK3CD_O00329	-0.142913	0.0145542	-0.0779397	-0.0147025	0.16668	0.116433	0.077792	0.0725426	-0.141211	-0.130118	0.0506356	0.13079	-0.175445	0.0685963	-0.0441547	-0.236751	-0.046378	-0.153002	-0.107767	0.074886	-0.0507121	-0.166751	0.0149075	0.055765	0.389545	0.406724	0.424114	0.353096	0.101843	-0.0150632	-0.0234653	-0.185813	0.112899	0.000943873	0.303228	-0.000944491	0.45176	0.502692	-0.05661	-0.0228851	0.0322506	-0.210388	0.00830624	-0.101749	-0.139161	0.0846418	-0.0322103	-0.0320533
MAN2A1_Q16706	0.044166	0.0737395	0.0350481	-0.0216864	0.0242643	-0.0382131	-0.0581066	-0.0332058	-0.0113178	0.0273426	-0.0163101	-0.0663588	0.031286	0.0112297	0.01303	-0.0933231	0.0613381	-0.0593912	0.00132359	-0.0359585	7.70799e-05	-0.0810503	0.0269362	-0.0641801	0.00756522	-0.0958733	-0.0461476	-7.7084e-05	0.0293551	0.00485489	0.0321639	-0.137477	0.0108632	-0.0515876	0.0412855	-0.00843922	0.0371967	-0.0179272	0.057057	-0.0345661	0.0209832	-0.0508295	-0.0423313	-0.0397911	0.00839014	-0.0498502	0.0482741	0.0260879	-0.2793
MAN2A2_P49641	-0.000329646	0.127655	0.061897	0.106529	-0.0541449	0.00221936	-0.0813956	-0.0287485	-0.26704	-0.0737878	-0.029124	0.00032957	0.0709598	-0.139099	0.0349598	0.194536	-0.0164763	0.0156014	-0.0103516	0.0824927	-0.0761396	-0.021688	0.0197364	-0.0174497	-0.0331382	-0.0534908	0.0102778	0.0673484	0.0260757	-0.018983	0.0149538	0.0871731	-0.0181195	0.027155	-0.0306781	0.0887292	0.0233301	-0.0513241	-0.0163632	0.024652	0.048694	-0.0124294	0.0174713	-0.044627	0.0123232	-0.0313231	-0.018228	0.044045	-0.104563
MYO18A_Q92614	-0.0228659	-0.00717789	0.00381067	-0.0230041	-0.0198343	-0.0106427	0.0106105	0.0105533	0.0598534	-0.0595039	0.0427774	-0.0731463	0.0349877	-0.00382076	0.0317852	0.0246361	0.0333412	0.0392591	0.0302094	0.0239595	-0.0167215	-0.0320617	0.0219474	-0.0513186	0.0570901	-0.0126886	-0.0055909	-0.00586164	-0.0151298	0.00911226	-0.000345771	0.000345688	-0.0507241	-0.0535726	0.0163135	0.0142358	0.00166546	-0.029714	-0.00166738	-0.00686869	0.019082	-0.026938	0.0714147	0.0144184	0.0343903	0.0253168	-0.00339907	-0.0176475	-0.137359
XAB2_Q9HCS7	0.0342924	-0.0222589	0.031484	-0.0611561	-0.091876	-0.0098599	0.0667051	0.0333742	0.124812	0.00437356	0.11524	0.0703282	-0.0140075	-0.00438686	-0.028627	-0.148502	-1.84771e-05	-0.00849201	-0.000341864	0.0561774	1.84768e-05	-0.0875858	0.0576095	-0.0073796	0.0444452	-0.010089	0.0258087	-0.136493	0.03618	0.0331067	0.0161711	-0.0221615	0.045052	-0.0883149	0.039712	-0.00505537	0.0301444	0.0455287	0.0564617	-0.0437591	-0.00660212	-0.0960876	0.0715079	-0.0425193	0.0517188	-0.0869381	0.00503771	-0.0680872	-0.0777719
SRP9_P49458	-0.0449027	-0.0348577	-0.0158518	0.0398765	0.0371949	0.0488373	0.0082837	-0.00833154	0.0600944	-0.0347159	-0.0389967	0.0341592	-0.0165516	0.149131	0.0153098	-0.0369363	-0.00884552	0.0543935	-0.0196898	0.0933493	-0.0573744	1.61467e-05	0.0312469	0.0540981	-0.0137649	-0.0437882	-0.0371813	0.00672903	-0.0493033	0.0119154	-1.61469e-05	0.0267389	-0.0935707	-0.0218509	0.0018937	0.0102914	0.00709748	0.0456986	-0.01668	-0.0185597	0.0281138	0.036084	-0.0531932	-0.00645584	-0.00189619	0.0995661	-0.0381556	0.0104746	-0.0794204
ECPAS_Q5VYK3	0.0741343	0.0125732	0.0725205	-0.010331	0.0178768	-0.055831	0.0575923	-0.0325443	-0.00774013	-0.0798029	0.0505936	-0.0340854	0.00769883	-0.0721465	0.0241373	-0.0752919	0.0818977	-0.0151094	0.0739992	-0.0146069	0.0168815	0.0312436	0.0213262	-0.045138	-0.0214677	-0.0816732	-0.0925293	-0.176496	0.080065	0.0144605	0.0539858	-0.0151491	0.0603081	0.00478978	0.0505021	-0.00480573	0.0241577	-0.0285229	0.0192197	-0.0157184	-0.0254424	-0.0785151	0.0136919	-0.0397908	0.0394004	-0.0248139	0.030092	-0.0343626	0.0252083
DNAJC17_Q9NVM6	0.0223282	-5.4128e-05	-0.0206871	-0.0556149	5.4126e-05	0.00335083	-0.0128483	0.0407815	-0.110004	0.0093749	-0.041847	0.00938863	0.0760949	-0.0391655	-0.00354102	0.0613612	0.0883321	-0.0627937	0.0912495	0.0121537	-0.0322701	-0.0116322	0.00782142	0.0324291	0.0519859	-0.0170199	0.0484534	-0.027114	0.0349672	-0.0123429	-0.00786405	-0.0864034	-0.0827289	-0.0273569	0.0430904	0.0418067	0.0184244	0.0134105	-0.0846791	0.0344917	0.00211631	-0.112096	0.0728488	-0.00471675	-0.0247162	-0.0711889	0.0117026	-0.00211942	-0.278997
PFDN2_Q9UHV9	-0.36066	-0.0849502	0.0793776	0.0494588	-0.0185831	-0.015424	0.022404	-0.132262	-0.104081	-0.0236841	0.0121339	-0.0122368	0.0550568	0.0321919	0.0899928	0.116986	-0.0966513	-0.115272	-0.145887	-0.114866	0.323802	0.618098	0.344758	0.385008	-0.0853369	-0.0117736	-0.127947	-0.0717126	0.115093	0.0116783	0.0712026	0.0552695	-0.106229	0.0141681	-0.0521095	0.0144568	-0.0114131	0.0122693	-0.00694355	0.0253883	-0.0389914	0.0545064	-0.0266656	0.0018503	-0.0184893	0.00296396	-0.00185267	0.0705912	-0.101827
PRPF6_O94906	0.0766199	-0.0337066	0.026963	0.0513933	-0.0239694	0.0413737	0.08088	-0.0499483	-0.0559719	-0.0566913	0.0173368	-0.0149917	0.0372155	-0.0501608	-0.00663692	0.00660653	0.0285137	-0.0496702	0.0634164	-0.000961922	-0.00532977	0.0735936	0.0430298	-0.089023	-0.019705	-0.0789235	-0.0529486	-0.108034	0.054411	0.0246583	0.000961281	0.0119371	0.0617438	-0.0512929	0.0489501	0.00234215	0.0181773	-0.064816	0.0217162	-0.00464136	-0.00234595	-0.0703887	0.00939282	-0.0308839	0.0183959	-0.0373985	0.0463241	-0.0452983	-0.0435445
PTRH1_Q86Y79																	0.102079	-0.177576	0.46193	0.211606	-0.190673	-0.756113	0.245537	-0.263754	0.165142	-0.231867	-0.00786237	-0.0116676	0.151327	0.234616	0.00781975	-0.317656																	-0.327929
POLE4_Q9NR33	-0.220032	-0.041859	0.0522462	0.178238	-0.180733	0.038127	0.0157234	0.0226472	-0.248035	-0.0733783	-0.0677117	0.0387245	-0.00998344	-0.157625	0.00991483	0.0135804	-0.00281576	0.0502677	-0.0683983	0.0570059	-0.117784	-0.0872841	-0.0689623	0.0675909	-0.0336962	-0.0275879	0.0245464	0.0738538	-0.0365951	0.0633412	0.00281028	0.0622674	-0.045666	0.00132776	0.00650535	0.0554808	-0.0311554	0.0415408	-0.0733928	-0.00795071	-0.0978949	0.051102	0.0708592	0.0491353	-0.051861	0.0389841	-0.0608609	-0.00132898	-0.350403
PHB_P35232	-0.0819559	0.0376478	0.125856	0.131807	-0.0118271	0.0758515	-0.0321096	-0.0575615	0.00776071	0.0185191	0.0398566	-0.171374	-0.11972	-0.132051	-0.00780268	0.0323439	0.0510617	0.0345946	0.0124641	-0.0324829	-0.0646723	-0.00875775	-0.0267238	0.0751477	-0.0765956	-0.0888123	0.0119967	-0.10682	-0.021004	0.00990551	0.0256773	0.00870491	-0.0481593	0.0604666	-0.0125867	0.000457398	-0.0349592	0.233336	-0.0490052	-0.0278328	0.0116576	0.0865662	-0.0335207	-0.000457543	0.00204561	0.024258	-0.013349	0.0400206	0.173909
LTN1_O94822-3	0.0862438	0.0094925	0.0967623	-0.0289051	0.00459383	-0.038793	0.0670851	-0.06764	0.00692139	-0.14796	0.0547238	-0.0485966	-0.00283861	-0.114435	0.00283304	-0.0742487	0.0402939	-0.00719098	0.0105956	0.00251329	0.0396774	0.0295255	0.0688088	-0.0156511	-0.0666356	-0.144805	-0.138188	-0.222261	0.0820588	-0.00251768	0.0464706	-0.014631	0.0602481	0.0296824	0.0439457	-0.0165704	0.026344	-0.0846306	0.0253706	0.0538505	-0.0432043	-0.128281	-0.0342228	-0.0923444	0.0163823	-0.0655729	0.050345	-0.0682814	0.0152722
ATP1A1_P05023	-0.0364228	0.0354876	-0.0399389	-0.0274244	0.00533053	0.019841	0.00527309	-0.00282052	-0.0045636	0.0111449	-0.00374497	0.00281502	0.010424	0.0467981	-0.0139578	-0.0152436	-0.0338628	0.000174082	-0.0472195	-0.0449745	0.0650107	0.0495133	0.0360983	0.0598501	-0.0244065	0.0242499	-0.000174103	-0.0152285	-0.00237122	-0.0331878	0.0126143	0.0366065	-0.0624854	0.0060632	-0.00608879	0.0231555	-0.00866142	0.01179	-0.0310929	-0.00992391	0.031272	0.0311096	-0.027173	0.0171365	-0.0472946	0.0182799	-0.0361225	0.0125766	-0.0080016
ATP1A3_P13637-3	-0.0826475	0.062393	-0.0340896	0.0281379	0.0247329	-0.0216186	0.0272693	0.00305319	-0.0162916	0.0416376	-0.0199743	-0.00305966	0.0142909	0.0156935	-0.00945682	-0.0193626	0.0427019	0.0721067	0.0248738	0.0998027	-0.120247	0.0370165	-0.0199228	0.00498523	0.0535426	-0.0278276	-0.00500252	0.013604	-0.106501	-0.0649743	-0.0474433	-0.0699019	-0.0277569	0.0737047	-0.054228	0.0769852	0.0168183	0.102172	-0.0172319	0.000499299	-0.0528268	0.0259619	0.0650077	0.112702	-0.0384567	-0.0287024	-0.0462563	-0.000499472	-0.116948
ATP1A4_Q13733	-0.0743792	0.0339732	-0.0554738	0.0132988	-0.0316844	0.0171077	-0.0170298	0.0354049	-0.00496471	0.0743109	-0.0159792	0.00494768	0.0148405	0.0560408	-0.0134015	-0.0214066	-0.0317813	0.0195311	0.00117119	0.0549278	-0.0244502	-0.0230134	-0.061827	-0.00551959	0.0719185	0.088472	0.0314087	0.0119642	-0.0663323	0.00674013	-0.0354514	-0.00117215	-0.0603934	0.0273174	0.020097	0.0223878	0.0231165	0.0575531	-0.0445532	-0.000757794	-0.0422694	0.0203274	-0.0403555	0.00985663	-0.0223695	-0.0240033	-0.0364428	0.000757396	0.537089
TBC1D23_Q9NUY8	-0.0163953	0.00993616	0.0109427	-0.0116488	-0.0381371	0.00563438	-0.00858576	0.029242	-0.0130037	-0.0408416	0.0249545	-0.0559392	0.0205928	-0.00565647	0.0148274	0.0523318	-0.00162541	0.0374423	0.0582019	0.0381965	-0.0114838	-0.103805	-0.00746197	-0.0582502	0.0443008	0.00162358	0.0392463	0.0198157	-0.0353173	-0.0129386	-0.0292026	0.0289462	-0.0458852	0.0227174	-0.0376238	-0.00355752	-0.0222897	-0.00146163	0.00146015	0.0225224	-0.0114955	0.00905485	0.0795068	0.0195293	0.00266815	0.0293459	-0.0335049	-0.0673405	0.133074
PCID2_Q5JVF3	0.0385147	0.0140255	0.0753874	0.0508431	-0.0196919	-0.0393959	0.00142987	-0.0429064	-0.00329109	-0.0117922	-0.00388691	-0.00143129	0.0445625	-0.0178785	0.0207399	0.0605731	0.0457269	-0.0468787	0.0463338	0.0242134	0.0827204	-0.0134991	0.0872293	-0.00836	0.0643444	-0.0534044	-0.050677	-0.112445	0.0829249	-0.0105745	0.00669618	-0.0067274	0.00817555	0.0215685	0.0127884	-0.0575424	0.00698163	-0.0560065	0.0355846	-0.0165543	-0.0770058	-0.0403456	-0.0574082	-0.0262621	0.0228751	-0.00679568	0.00676382	0.0195063	-0.0233198
MSTO1_Q9BUK6	0.0453476	-0.0423362	0.0122648	0.0177148	0.0180709	-0.0286041	-0.0230002	0.0424963	-0.0643637	-0.0116989	0.0485665	-0.0512041	0.0116048	-0.0934553	-0.038923	0.0756399	-0.0235463	-0.0337413	-0.0430729	-0.0617624	0.00939437	0.0893382	0.0645509	0.0295125	0.0147865	-0.0474271	-0.0498722	-0.131451	0.035421	0.0771511	0.050209	-0.00945594	0.0234933	0.0017633	-0.0429848	0.0520469	0.068199	0.0059602	0.0219874	-0.0843652	-0.0294636	0.0675133	-0.0516124	-0.00176545	-0.11637	-0.019999	0.0643498	-0.0276439	-0.15495
WDHD1_O75717	0.0674022	0.00160872	-0.0103735	-0.0298054	-0.0321598	-0.0172019	-0.0207299	-0.00161051	0.13689	-0.0912708	0.0401377	-0.0369748	0.0246423	0.0109949	0.0222776	0.0263449	-0.0213051	-0.0303772	-0.0490567	-0.0250588	0.0762553	0.080289	0.117651	0.0365317	-0.0327019	-0.0996959	-0.0694265	-0.0950144	0.0696348	0.0650185	0.0639916	0.020995	-0.0404769	0.0159045	-0.0117587	0.0318159	0.0198897	-0.00654083	0.0379341	0.0100924	0.000198164	-0.0470328	-0.0166411	-0.00597843	0.021607	-0.000198191	0.000239637	-0.00519421	0.173725
RAD54B_Q9Y620																																	-0.0458808	0.0648628	-0.0273167	0.0294391	-0.191542	-0.0291683	0.0362962	0.175136	0.0895702	-0.19781	0.026809	-0.201931	0.0292962	-0.0630069	0.0359077	-0.114672	-0.0463794
SCLY_Q96I15	-0.0183618	0.00881637	0.0366788	0.0012892	-0.00935018	-0.0567471	0.0273905	0.0509368	-0.00681662	0.0628111	-0.0481318	-0.0265956	0.0530301	-0.00129035	0.0106157	-0.0470199	-0.0576365	-0.000659499	-0.0135278	0.0948734	-0.0058581	-0.00494084	0.0327434	-0.0291653	0.0186781	0.0325466	0.053544	0.0899932	-0.0168735	-0.0432043	0.000659197	0.00635045	-0.084713	-0.0343908	0.00906928	-0.0472566	0.0116947	-0.0145966	-0.0436871	0.00294555	0.162787	0.158686	0.00650591	-0.0128075	0.0173289	0.0466001	-0.0149262	-0.00295158	-0.0620966
GOLGA2_Q08379	0.0513525	0.0223867	0.0175827	0.0748064	-0.0119231	-0.0877431	-0.0215205	0.0184571	-0.0778397	-0.0267333	-0.0317722	0.0174555	0.0600948	-0.0835503	-0.0050339	0.00501639	0.0279138	0.00243002	0.0834266	0.0442786	-0.0633644	0.0030475	0.00344677	-0.0185065	-0.0681786	-0.0698384	-0.0426786	-0.0731758	0.00852895	0.00380235	-0.00243412	-0.0204319	0.0278912	-0.0468206	0.0119497	0.00829573	0.0130487	-0.0453342	0.0138894	0.0232096	-0.0288633	-0.0961863	-0.00834371	-0.0392644	0.0294198	0.0296113	-0.023138	-0.0300581	-0.221571
MTPAP_Q9NVV4																	0.0428613	-0.0727886	-0.0900989	-0.0793378	0.0830519	0.156999	0.0818386	-0.00458742	-0.0562037	-0.156898	-0.0317717	0.00457288	0.0353624	0.0232565	-0.0396889	0.0208399	-0.00365305	-0.136208	0.152462	0.0335474	0.093361	-0.105521	0.00364382	-0.0640901	-0.0184402	-0.106725	0.136203	0.121197	0.195806	-0.029129	0.141592	-0.0804859	-0.269771
SYVN1_Q86TM6	-0.0598218	0.0530691	0.06951	0.0297858	-0.080691	-0.0184208	-0.102699	-0.0472515	0.0664898	-0.0553621	0.0196826	0.00926739	0.00319245	-0.0702187	-0.00319953	0.0742674	0.00881105	-0.0348961	0.0526687	-0.0118564	0.0745041	-0.0293465	0.0756826	-0.0777413	0.0245661	-0.0933802	0.00599644	-0.0378187	0.0445407	0.0571647	-0.00602147	-0.0162231	0.00815839	0.0013689	-0.0198952	-0.000146538	0.0635085	-0.0199513	-0.0446084	0.0804143	0.0480413	0.0132388	-0.00429501	0.000146523	-0.00449638	-0.0637996	0.02559	-0.0416008	-0.181633
IGBP1_P78318	-0.0539266	0.0380472	-0.0265388	0.0126215	-0.0344186	0.00814646	-0.0352028	0.00140888	0.0486332	-0.00141026	-0.015816	-0.0580474	0.0283062	0.0186657	-0.0367582	0.043728	0.027316	0.0461054	-0.0124775	0.0409466	-0.170702	-0.293041	-0.155996	-0.132234	0.0115104	-0.0088825	0.00882814	0.0328538	-0.11	0.0342908	-0.0739784	0.0339046	-0.0453873	-0.0592144	0.0185458	-0.0547395	-0.0293459	0.0662003	0.0579862	0.000552622	0.0758652	-0.00539164	0.0790805	0.00841894	-0.000552834	0.0910023	-0.0167948	-0.00374676	-0.120016
KIF5B_P33176	0.0677755	-0.00167216	0.067837	-0.0502256	0.0158934	-0.00343176	0.0187836	-0.018938	0.0753213	-0.0444017	0.00285319	-0.055122	-0.00133065	0.00132943	0.0111069	-0.0366919	0.0043742	-0.0440797	-0.0222571	-0.0732848	0.0560196	0.0291161	0.0532431	0.048441	-0.0463392	-0.0461107	-0.048085	-0.0955346	0.0651217	0.104144	0.0321558	-0.0043875	0.000471316	-0.0560718	0.0498468	-0.038316	-0.0256296	-0.037088	0.00457642	-0.0650891	-0.00047147	0.00569731	0.0144415	-0.0325777	0.00872029	0.00500604	0.0176011	-0.0277312	-0.0653278
KIF5A_Q12840	0.048925	-0.0221876	0.0382032	0.0327356	-0.017732	-0.0211427	0.0401192	-0.01942	0.0545606	-0.0687628	0.00832839	-0.0555512	0.0439749	-0.046904	-0.00837674	0.0115076	-0.0195837	-0.0598534	-0.0206462	-0.0290475	0.0412299	0.0123476	0.057256	-0.0375644	0.0147826	-0.0509605	-0.00915694	-0.0770384	0.03123	0.0250986	0.00909919	0.0149493	0.0413005	0.0409484	0.0258435	0.000285004	-0.00143279	0.0444214	-0.00540031	0.0236338	-0.0230492	-0.00028506	-0.0298143	0.00312504	-0.0236801	-0.0583999	-0.0151817	0.00332999	-0.102752
TOM1L2_Q6ZVM7	-0.120442	0.163327	0.0918916	0.0835412	-0.0172048	-0.161388	-0.00490606	-0.217321	0.156738	-0.299175	0.108729	-0.352103	0.109727	0.0368185	-0.0726902	0.00488943	-0.0727781	0.0698111	-0.0399074	0.0652769	-0.110873	-0.0813604	0.0287316	-0.0232899	0.103348	-0.0562866	0.047686	0.0659046	0.0229198	0.0295323	-0.135435	-0.0729344	-0.0259284	0.0472289	0.103757	0.11142	-0.0666817	0.0304792	-0.00190348	-0.0166822	0.0294857	0.104707	-0.0504948	0.0378375	-0.107829	-0.0219588	0.00190097	-0.0209269	-0.0977564
SLC7A6OS_Q96CW6	-0.0686954	0.0242863	0.00414304	-0.0123174	-0.00415497	0.00724625	-0.0738546	0.0227015	-0.0288008	-0.0413048	-0.0697494	-0.02365	0.064006	0.0101415	0.0193063	0.0606118	0.0195155	0.13419	0.00804622	-0.0544779	0.0573578	-0.256961	-0.00809134	-0.0543678	0.0344424	0.0647157	0.129159	0.0679245	-0.118979	-0.402468	-0.0632198	-0.042059	-0.0755449	0.0224599	-0.0213924	-0.00499064	-0.0149448	-0.039557	-0.0121024	0.0684882	-0.0294745	0.0341285	-0.143659	0.0118052	0.015535	0.0336963	0.0130274	0.00497343	-0.0796971
KIAA0930_Q6ICG6-2	-0.0287555	0.213931	0.221811	-0.217387	-0.0700774	0.101922	0.0281935	-0.0968107	-0.377308	0.275114	0.0447157	-0.501718	0.252676	0.347375	-0.190017	-0.12963	0.0541293	-0.051268	-0.00861272	0.391464	-0.212821	0.0573885	-0.0555614	-0.186679	0.202942	-0.147922	0.0236845	0.086157	0.127051	-0.0647311	-0.142969	0.00856161	0.0448963	0.0119012	-0.284788	0.243575	-0.12149	0.0471555	-0.0120002	0.2071	0.266159	0.137492	-0.155985	-0.0792094	-0.0386624	0.17774	-0.187183	-0.0503535	-0.442096
NEMF_O60524	0.001815	0.0434376	0.0141568	-0.029395	-0.0323222	-0.0592715	0.0192205	0.00658408	-0.0246229	0.00462076	-0.0232345	-0.0263727	0.073285	-0.00181729	0.0091487	-0.00327323	-0.00514451	0.0551485	0.0926813	-0.00859447	0.0140367	0.103228	0.100347	-0.0306112	-0.0419181	-0.0304366	-0.0270612	-0.00882461	0.00512623	0.0740414	0.0224602	-0.0199192	-0.0473996	-0.00447683	0.0176247	0.00446298	0.0188796	-0.0162645	0.0252852	0.00799909	0.015809	-0.0287149	0.0712774	0.0223897	-0.0183879	-0.0102574	-0.0467431	-0.0450734	-0.0488557
CCNK_O75909-4	0.0810624	0.0524121	-0.0412299	-0.0157304	0.00767433	0.0185276	-0.139344	0.0492328	0.0351758	-0.13626	-0.0270974	-0.0975881	-0.00771537	-0.0273706	0.0973648	0.0827415	0.0554332	0.0641449	0.0964788	0.120892	-0.104698	-0.264333	-0.220797	-0.205812	0.10246	0.0883673	0.173121	0.149552	-0.164549	-0.186119	-0.130948	-0.0576485	0.0353573	0.0876052	-0.0262934	0.0329672	0.0101813	0.0787413	0.0136813	0.0846508	-0.0754502	-0.0259475	-0.0244258	0.0414738	-0.0173072	-0.0758764	-0.0102537	-0.0232651	-0.142887
FAM78A_Q5JUQ0	-0.244815	-0.036261	0.160571	0.0874611	0.254001	-0.0704979	0.224796	-0.19207	-0.121575	0.0631087	-0.0525742	0.00628656	0.0621382	0.125835	-0.00631408	-0.0637673	0.067679	0.00903392	-0.0128093	0.0725328	-0.00346874	-0.125103	-0.116366	0.013831	0.112846	-0.0208943	0.036693	-0.0109466	-0.100275	-0.0774887	0.00346042	0.0945549	0.10936	-0.357928	-0.00588958	-0.194542	0.149711	0.0138618	-0.394369	-0.0770573	0.27438	0.21081	-0.206732	0.146959	0.0168407	-0.27493	-0.105164	0.00586563	-0.0643175
TNKS1BP1_Q9C0C2	-0.00363556	0.00362642	-0.0544284	-0.0460934	0.0240272	-0.0107231	-0.0154505	0.0321678	0.0276763	-0.0559456	0.0063417	-0.00621009	0.0372695	0.018592	-0.0152736	0.01515	-0.0239318	0.0384104	-0.00979642	0.0256584	-0.0264326	0.0301878	-0.0256165	-0.0138439	0.0220926	0.0149552	0.0535051	0.0442519	-0.0632967	0.00404105	-0.0693014	-0.0040524	-0.0614629	0.0134077	-0.0266144	0.0246568	-0.0290282	0.0231798	0.000827761	0.0308316	-0.000828236	0.028302	-0.0279405	0.0222752	-0.0679862	0.00227261	-0.0268537	-0.0163028	-0.154912
C9orf40_Q8IXQ3	-0.429316	-0.173178	0.0527834	0.160521	0.0358761	-0.114846	-0.221327	-0.0977841	-0.0402093	-0.036791	-0.0609241	0.0869757	0.0601719	0.0490141	0.131549	0.0644286	-0.0775083	-0.028899	-0.0595491	0.00150893	-0.0758101	0.00493018	-0.0213342	0.0182862	0.0295175	-0.00151051	0.0316472	0.0481128	-0.0875844	0.0250417	-0.113889	0.100823	-0.172932	0.0373045	-0.0683629	-0.0214828	0.0385433	-0.0203247	0.0200423	0.0404174	0.0445929	-0.0633325	0.078525	0.040642	-0.0404316	0.0273285	-0.0210812	-0.0727106	-0.287045
CLTC_Q00610	0.0957119	-0.0166639	0.0988666	-0.00938611	0.0220069	-0.0333857	0.0912387	-0.0221518	0.00932544	-0.0618738	0.0809054	-0.0232859	0.053879	-0.0631829	0.065492	-0.0560057	0.0748168	-0.0198626	0.0821627	-0.0311452	0.122086	0.0699548	0.0960536	0.00937397	-0.00943527	-0.129544	-0.0277791	-0.139007	0.144077	-0.0380395	0.101995	-0.0421646	0.0860331	-0.0251307	0.0743684	-0.0154339	0.0407049	-0.0661773	0.0557665	-0.0274614	0.0152705	-0.117819	0.0203361	-0.0801953	0.0986907	-0.0254739	0.0644248	-0.0340404	0.181191
PFKFB4_Q16877	0.0464599	-0.0181744	0.146556	0.0280212	-0.0791246	-0.0419019	0.119426	-0.0734912	0.0407371	-0.0465656	-0.0254305	-0.0370476	0.0327612	-0.164046	0.0179483	0.0251168	0.03335	0.00599883	0.0457112	0.032706	0.0334401	-0.00602387	0.0204436	-0.07496	0.0378885	-0.0234796	-0.0312167	-0.0577828	0.00627873	-0.0196393	-0.0326278	-0.0269779	-0.0317807	0.0946554	-0.112009	0.0222088	0.0285883	-0.00660358	0.105473	0.0489543	0.00304162	0.0147408	-0.0140202	-0.0404155	0.00509336	-0.111713	-0.0135317	-0.00304804	-0.104236
PFKFB3_Q16875-4	0.00156751	0.014734	0.00830908	-0.00156921	-0.0421719	-0.0727295	0.0251273	0.0680507	0.00337033	-0.0634449	0.020512	0.00223088	-0.0285903	-0.050417	-0.013265	-0.0171949	0.0310457	-0.0571742	0.0128573	0.000902676	0.0416431	-0.0361678	-0.00766028	0.0147077	-0.0644611	-0.0267929	-0.000903241	-0.0105383	0.067035	0.0158989	0.0318513	-0.0563873	0.0108488	0.100809	0.170694	-0.0201376	0.0610295	-0.0783035	-0.0486924	-2.88304e-05	-0.0609297	-0.115142	-0.00410085	0.0276173	2.88298e-05	0.0357828	0.0222902	-0.0154489	0.227883
PFKFB2_O60825	-0.00166561	0.00649783	0.0138749	0.00166369	0.0253417	-0.0241444	-0.00416936	0.00530628	-0.0139121	-0.125472	0.0339409	-0.0247014	0.0468188	-0.014558	0.0160837	-0.0305553	0.0775889	-0.021391	0.038312	-0.0187196	0.0289161	-0.0706714	0.018289	-0.050599	0.0251405	-0.0831524	-0.0104131	-0.0589659	0.0321891	-0.0474236	0.024048	0.0103384	-0.000566114	0.00630427	0.0270397	0.000565892	0.0356467	-0.064873	0.0252004	-0.00189943	0.0695198	-0.0360072	-0.00168749	-0.067407	0.0112325	-0.0123901	0.0255667	-0.0271247	-0.0365097
PFKFB1_P16118	0.0873421	0.0254484	0.0105923	-0.0747236	-0.0260372	-0.0586639	0.0827798	-0.0106707	-0.0869875	-0.210515	-0.0983091	0.064783	0.104515	-0.106575	0.0154501	0.0774034	0.000509741	-0.0198365	0.00571934	0.0563992	-0.035285	-0.00604855	0.138981	-0.000509921	-0.00131275	0.0204271	-0.0200405	-0.0777987	0.0504792	0.141904	0.140923	-0.0323712	-0.0128199	0.0688801	0.00495569	0.0036878	-0.0132422	-0.0624738	-0.00369725	0.010209	0.144013	-0.178268	0.113816	0.18384	-0.118042	0.00985996	-0.0274057	-0.0927407	-0.271344
FASN_P49327	0.0646133	-0.00421702	0.0575036	-0.0167037	0.0244549	-0.0192985	0.0641373	-0.0107908	-0.000426011	0.000425885	0.0439712	-0.0227373	0.00536067	-0.0240289	0.0200166	-0.0373683	0.0722508	-0.0102347	0.0672992	-0.00226926	0.0197689	-0.0922645	0.0022657	-0.0428081	0.0267029	-0.00845222	0.0114056	-0.0493928	0.0714579	-0.00940258	0.0403008	-0.018474	0.0622606	0.000557791	0.0260608	-0.000558007	0.0197723	-0.0333708	0.0194754	-0.0232218	-0.0011116	-0.0431575	0.0311807	-0.00615695	0.0543905	-0.00588032	0.0283598	-0.0167856	0.194827
POLD1_P28340	0.0248383	-0.0148137	0.0224686	-0.0435956	-0.020587	-0.0207553	0.00159082	0.00491883	0.0167153	-0.0609098	0.0352032	-0.0504042	0.049881	0.00247935	-0.00457256	-0.00159257	0.00437082	-0.00748572	0.0260149	0.00793546	0.0832688	-0.0273405	0.0328922	-0.00630447	-0.0177383	-0.0691169	-0.0316955	-0.0901684	0.0707711	0.014201	0.028259	-0.00438411	-0.00456909	-0.0723756	0.0170331	0.00455466	0.0218046	-0.0604302	0.045904	-0.0253168	-0.0125808	-0.0329189	0.0492829	-0.0281042	0.0334216	0.027117	0.00774288	-0.0308992	0.0241142
FASN_A0A0U1RRG3
FAM83D_Q9H4H8	0.082281	-0.0650693	0.119978	0.0272649	-0.00764585	-0.0396193	0.000619968	0.0462761	-0.187572	-0.0442803	0.00173478	-0.00199538	0.0138887	-0.0559128	-0.000620234	0.0566353	-0.0623986	0.0109576	0.0328606	0.0287899	-0.0203375	-0.0845054	0.0342141	-0.0766392	0.0621316	-0.00348623	0.0171168	-0.0537829	0.0058009	-0.018536	-0.0223331	0.00347782	0.0544459	0.0396035	0.0124701	-0.0788641	-0.00641349	0.00232178	-0.0229431	0.00686239	0.0481657	-0.099472	0.0107025	0.0325349	-0.00232552	-0.036871	-0.0740926	-0.121645	-0.0977208
DENND4B_O75064	0.048498	0.0566798	0.0473771	-0.0312965	-0.0112578	-0.0140149	0.0742741	-0.0994217	0.0204631	-0.0664114	-0.0751174	-0.0170389	0.0416294	0.0111706	-0.0937991	0.0438278	0.110386	0.13923	0.110615	0.120261	-0.053055	-0.137862	-0.0512887	-0.12574	0.0894267	-0.00166874	0.0764376	0.0925194	-0.0966731	0.00166682	-0.0693112	-0.0756415	-0.0124633	0.0063639	-0.104029	0.0783945	0.0285899	-0.0196573	0.0155161	-0.0761975	-0.145653	-0.00303636	0.000219276	-0.0250071	0.0500262	-0.000219309	0.182127	0.0200875	-0.200174
RAD18_Q9NS91	0.00196913	0.000984903	0.022294	0.0421733	-0.000985576	0.0128999	-0.0755274	-0.0261768	-0.0173758	-0.0307198	-0.0187464	-0.0248366	0.0481346	-0.0570294	0.00238746	0.0513971	-0.0641679	0.00120687	0.00108727	0.0430729	0.0229251	0.000988353	-0.000989031	0.0294671	-0.0187033	-0.028308	-0.0133125	0.0179707	-0.010402	-0.0322927	-0.0354341	0.00175418	-0.0650839	-0.101104	0.0023392	-0.002343	0.0298381	0.0170871	0.0134633	0.00834117	-0.0204055	-0.0595797	-0.0122917	0.0306789	-0.023128	0.0275995	-0.0646144	0.0214392	0.0170894
RSL1D1_O76021	0.0754986	0.0325311	0.00610692	-0.0795564	0.0211253	-0.00174496	0.016164	-0.0203598	0.0818347	-0.0533326	0.00138475	-0.0222447	-0.0178497	0.0596721	-0.00138608	-0.0531886	0.0309473	-0.0548694	0.0198643	-0.0301583	0.0301593	-0.0339231	0.00451921	0.054991	-0.0640304	-0.0346147	-0.0622689	-0.0489258	0.0183054	0.0273456	-0.00453341	0.0195153	-0.0711674	-0.00400103	0.00605049	-0.0137261	0.0114368	-0.0323103	-0.0209663	0.00430361	0.0429081	0.0022937	-0.0334626	0.00196114	0.0264909	0.105896	-0.00754463	-0.00196381	-0.00588089
COPB2_P35606	0.00399573	0.0168072	-0.0124592	0.0150718	-0.010267	-0.0109485	0.0038783	0.00504298	-0.0916716	0.0143359	0.00278642	0.0133365	-0.00279181	-0.0331122	-0.00507689	-0.0239889	0.0436012	0.0412808	0.0246512	0.0321695	-0.025947	-0.0989541	-0.0709659	-0.0582962	0.0411125	0.0325668	0.0416577	0.0065182	-0.0167449	-0.0322655	-0.00654778	-0.0139283	0.0018413	0.0412999	-0.0189832	0.00358813	0.008715	0.0310186	-0.0100624	-0.00395821	-0.0168442	-1.38533e-05	-0.0126688	0.00149537	-0.0262326	1.38531e-05	-0.0240218	0.0132084	0.268791
MDC1_Q14676	-0.00268669	0.0026817	0.0126234	-0.0173442	-0.0355367	-0.0269935	0.0177046	0.0328191	0.00435609	-0.00451539	-0.0145857	-0.0175618	0.0493193	-0.0295209	0.00325389	0.0680631	-0.00717217	-0.0212067	0.0132501	0.0226394	-0.0380827	0.0168765	-0.0107129	-0.0206625	0.0390532	-0.0135666	-0.00300058	0.0135227	0.0117603	0.0408433	-0.000149129	0.000149114	0.00590883	-0.00399366	0.00398264	0.00432613	-0.0335925	0.0155723	-0.0163267	0.0133818	-0.0333748	-0.0124923	0.0342534	-0.0162892	-0.0108817	-0.03141	0.0350118	0.0129442	-0.131141
ZNF638_Q14966	0.00045163	0.0272327	-0.0254032	-0.0385801	-0.000451772	-0.0227203	-0.0465997	0.0708403	0.026566	-0.0493442	0.0104872	-0.048534	0.05725	0.0317715	-0.00819893	0.0455401	0.017828	-0.0061776	0.00247934	-0.000517643	0.0251169	0.0362003	-0.0105466	0.000517457	-0.0297849	-0.0430377	-0.0166223	-0.113942	0.0155876	0.122593	-0.0402268	0.0409535	-0.0367504	-0.00133608	0.0182684	0.0589689	0.00133485	-0.0375565	0.031854	0.0319218	-0.0104418	-0.0306886	0.0245469	0.0348793	-0.0131114	0.0750303	-0.0309411	-0.014476	-0.148887
SLC16A1_P53985	0.0363227	0.00429209	-0.0565079	-0.045813	-0.000986101	0.0396233	0.000985427	0.00243992	-0.173509	0.0918349	-0.0797229	0.0446683	-0.023423	-0.00610115	-0.0596526	0.0127333	0.0777265	0.348337	0.253789	0.238932	-0.374993	-0.462282	-0.356846	-0.325213	0.270671	0.24111	0.287606	0.152343	-0.346449	-0.144292	-0.183358	-0.0821537	-0.0680338	-0.0244089	0.0691462	-0.0786912	-0.0732256	0.0505167	-0.00447219	-0.000708728	0.209714	0.0645493	0.0334158	0.0137214	-0.0100374	0.164661	-0.0601382	0.00070838	-0.090138
NOLC1_Q14978-2	0.0239142	0.00483351	0.0127052	0.00795889	-0.0754448	-0.00484976	-0.0321439	0.0326195	0.0601595	-0.00824213	-0.0489547	-0.0937213	-0.0449414	0.0242252	-0.0119101	0.0340157	0.0333855	-0.00124701	0.0332253	0.00124593	-0.0609598	-0.0709704	-0.106984	-0.0659238	-0.00675597	0.0606056	0.0740967	0.0390132	-0.0839399	0.0181189	-0.0724089	0.00188924	-0.0186123	-0.016353	0.0205479	0.00316694	-0.0463852	0.0625951	-0.0162106	-0.00274832	-0.0362212	0.052877	0.0341442	0.0452444	-0.00771293	0.0399172	-0.0563332	0.00274309	-0.136039
NOLC1_Q14978-3	0.0376696	0.00336051	-0.00336835	-0.108217	0.234139	-0.115134	-0.0712303	0.154335	-0.0336819	-0.149611	0.0721943	0.285835	-0.0985618	-0.0663762	0.339908	0.111355	-0.0439169	-0.0142115	0.0140728	0.0304024	0.0717995	0.157322	-0.0883793	-0.0171767	-0.144494	-0.109657	0.0849365	0.180813	-0.181668	-0.132036	0.0389453	0.0952769	-0.243157	-0.193729	0.129252	-0.154109	0.0383629	0.344526	0.141826	0.251767	-0.062521	-0.0405719	-0.174103	0.0337609	0.0211667	-0.0518868	-0.0195791	0.019317	-0.330191
RTF2_Q9BY42	-0.0389838	-0.102448	-0.0563745	0.111228	-0.106687	-0.138936	0.0460632	-0.00353803	0.0353552	-0.0568693	0.164043	0.0394848	0.196248	-0.0918051	0.00352937	0.143795	-0.0385354	-0.124087	-0.0627795	0.0642249	0.0449868	0.0422709	0.00742471	0.023997	-0.00464979	0.00463485	-0.030948	-0.126844	0.0139425	-0.0959931	0.0369364	-0.00907753	-0.0387442	0.00675591	0.0254183	0.0614012	0.000568051	0.0399049	-0.00643503	-0.000568274	0.0195426	-0.0726069	-0.0217346	0.0131233	-0.011222	0.0258403	-0.0322086	-0.0158148	-0.0995595
ATP6V0A2_Q9Y487	-0.0185969	0.0231085	0.0301973	0.04415	-0.0832349	-0.010211	-0.0429555	0.00954003	-0.0752911	-0.0171764	0.0192774	0.0509311	0.0130558	-0.0342378	-0.00960353	0.0413024	0.0684446	0.109808	0.103453	0.155837	-0.16243	-0.0718542	-0.207817	-0.245942	0.155229	0.124631	0.113034	0.102909	-0.133298	-0.0955801	-0.172682	-0.0855238	-0.0659771	0.00622741	-0.0462049	0.0518144	0.0243636	0.028417	0.00473297	-0.0196533	-0.0556631	-4.16064e-05	-0.0344248	0.0368751	-0.0292168	4.16052e-05	0.00130537	-0.0290446	-0.131166
TCIRG1_Q13488	0.0536038	0.127579	-0.00576557	0.146875	-0.0732232	0.000478172	-0.0337974	-0.00972161	-0.099456	-0.00047833	-0.0666303	0.0106983	0.069125	0.0627286	-0.0488885	0.00911581	0.052156	-0.0168027	0.046	-0.0390454	-0.00676229	-0.0476803	0.0176277	-0.0322986	0.0845389	0.0122641	0.00048859	0.0124547	-0.0125375	0.0205486	-0.000488756	-0.020277	-0.00188413	-0.162219	-0.0542904	-0.0803079	-0.0348991	-0.10349	0.0166688	0.156485	0.0900956	0.0830616	-0.064305	0.103971	0.17222	-0.0427623	0.00188167	0.0797322	-0.53848
ATP6V0A1_Q93050-3	-0.0325503	-0.0242477	-0.00655767	0.0529229	-0.0104716	-0.0049997	-0.0482487	0.0213685	0.0040058	0.0412664	-0.00401695	0.0395233	0.0645769	0.03472	-0.0134749	0.0732103	0.0116591	0.0273247	0.0398376	0.023226	-0.0449489	-0.0961765	-0.0703523	-0.0464645	0.0564317	0.132963	0.00980395	0.0706069	-0.10999	-0.0375823	-0.0510426	-0.00987103	0.0205205	0.02594	-0.0247341	0.0276314	0.013209	0.00197075	-0.00760385	-0.0547809	0.0234835	-0.042354	0.00781509	0.000422614	-0.00901314	-0.000422738	-0.0206474	-0.0287049	0.0202179
ATP6V0A1_Q93050	-0.0326638	-0.0826446	0.0670245	0.189423	0.119088	0.158509	-0.0413276	0.00262095	-0.0274715	0.156116	-0.0372401	0.181559	0.161258	-0.0253519	-0.00262572	-0.0339978	0.00517738	0.0188693	-0.00519602	0.106908	0.0296437	-0.0997433	-0.107585	-0.0467202	0.234427	0.0637545	0.0109752	0.0647409	-0.0508848	-0.013908	-0.0117012	-0.0339435	-0.0473495	0.0053337	0.0286262	0.0428668	0.0944131	-0.312181	0.148157	0.00329789	0.0314824	-0.187958	-0.0321045	-0.04556	-0.175056	-0.158115	-0.00330545	0.2094
GTF3C3_Q9Y5Q9	0.0756777	0.0782751	0.0442996	-0.0233911	-0.0592818	-0.0435962	0.0668959	-0.104376	-0.152262	0.0630057	0.00525248	-0.00527167	0.0417945	-0.0773055	0.077013	-0.0105592	0.0134881	0.027788	0.0283723	0.140473	-0.0621021	-0.253492	-0.0576517	-0.157572	0.0515615	-0.0422276	-0.0136154	-0.0608826	0.0186475	0.0461556	-0.0954651	0.0586445	-0.00523357	0.045146	-0.0150233	0.0329753	0.0360254	-0.00121049	0.00120948	0.0958244	-0.0131789	0.0290646	0.0529259	0.0280091	-0.0250578	-0.078273	-0.0939151	-0.130675	-0.0169038
PLPPR3_Q6T4P5-3																																	0.0245476	-0.18397	-0.443283	-0.373871	0.0360042	-0.214414	-0.0122429	0.0174659	0.352199	-0.682194	-0.109234	0.0121399	0.285862	0.290234	0.330359	-0.194834
NDUFAF4_Q9P032	0.0480754	0.00622632	0.0706811	0.0149647	-0.0449389	-0.00625331	0.0122851	-0.013434	-0.0414952	-0.074994	0.01475	-0.0283176	-0.0814828	-0.106168	0.0139639	0.0166107	0.0544426	-0.00968696	0.00281536	-0.00110135	0.0406391	0.322767	-0.0100262	-0.0165182	-0.0527257	-0.108198	-0.0264252	-0.0482178	0.0832355	0.00110051	0.0236835	0.0821371	0.0540769	0.0435633	0.0530383	-0.00104938	-0.00794416	-0.00143978	0.0401375	-0.0188933	0.00104862	-0.0206131	0.00547005	-0.0580681	0.00810494	-0.0244484	0.0135821	-0.00446487	-0.0455486
CNOT2_Q9NZN8	0.0939356	-0.0178789	0.128886	0.000718127	-0.000718484	-0.0270061	0.0362212	-0.067799	0.0586662	-0.00979544	-0.0136476	-0.0192687	0.0785591	-0.0396785	0.027053	0.017218	-0.0858534	0.00644457	0.0324281	-0.0415463	0.113463	0.227376	0.172657	0.0489079	-0.00647349	-0.112487	-0.0938662	-0.0929977	0.039145	-0.023949	0.0272375	-0.0330889	-0.00704805	-0.0376143	0.00701378	-0.0433179	0.0187997	-0.0349848	-0.0325463	0.00738778	0.00890802	-0.0573127	0.0099275	-0.064242	0.00809192	-0.0164053	0.046034	0.0145918	-0.104872
CNOT2_F8VRS8
COQ5_Q5HYK3	0.0526371	-0.00945026	-0.0209897	0.0473736	-0.00671269	-0.014822	0.00743589	0.0066816	-0.0578768	-0.00789493	-0.0244454	0.0804617	0.0939577	0.0549903	-0.0660812	0.0589822	-0.0120963	0.000668861	-0.0640348	0.0442629	0.0124243	0.0478956	0.0723578	-0.000669172	-0.00815636	0.0103332	0.0273717	-0.0382767	-0.029556	0.0843566	-0.0413864	-0.0121033	-0.20746	-0.155613	-0.037412	0.0402558	0.0164521	-0.0245981	0.118324	0.00682881	0.0123521	-0.0628069	0.117057	0.0449272	-0.0445017	-0.139906	0.146701	-0.00686129	-0.166771
POLR1E_Q9GZS1	0.0487892	0.0171344	-0.000827508	0.0359674	0.0293508	-0.0845439	0.000827033	-0.0935593	-0.019528	-0.101854	0.0117152	-0.054115	0.0396764	-0.0719318	0.00537014	-0.0859981	0.0244414	-0.00434017	-0.0145463	-0.0402633	7.15335e-05	-0.0428236	0.0224253	0.0173818	0.0349216	-0.0303361	-0.054744	-0.0540706	-7.1537e-05	0.0628208	0.017001	0.0403756	0.0454245	-0.0894545	0.0275758	0.0574512	-0.00141987	0.000606768	-0.021048	0.0554896	-0.0497433	-0.0841439	0.0596028	-0.0018126	0.075613	-0.113963	0.0132126	-0.000607023	-0.0157122
OXCT1_P55809	0.0808419	-0.0238364	0.014301	-0.00428716	-0.0273941	-0.0452484	0.0883302	-0.00893687	0.00427446	0.025477	-0.00617364	-0.00810921	0.0114226	0.00561874	0.0369377	-0.0475917	0.065967	-0.0239542	-0.0172233	-0.0347069	0.0467159	-0.024758	0.0406131	-0.0337599	0.00245005	-0.0412649	-0.00447081	-0.00245421	0.0322266	0.0377079	0.0608744	0.0233281	0.0271327	-0.0227894	0.0166707	-0.014649	-0.0024902	-0.00990852	-0.0100065	-0.0315634	-0.0117837	-0.0321865	0.00364461	0.00555525	0.0309261	0.00248591	0.0145935	0.00445585	0.448194
MARS_P56192	0.0742528	0.00983281	0.0344882	-0.0448967	0.0438464	-0.00990028	0.0400088	-0.0131468	-0.0242782	-0.076976	0.0221893	-0.0294754	0.0152244	-0.0528025	0.0354286	-0.0334802	0.0936146	0.0303576	0.0980658	-0.00851333	-0.010532	-0.0705409	0.0286894	-0.0309535	0.0287098	-0.0692338	-0.0299931	-0.0926046	0.0703117	0.00846339	0.0607809	-0.0307671	0.0462649	0.00324126	0.0415855	-0.00105507	0.0467324	-0.0638011	0.0284685	-0.0101469	-0.0118207	-0.0898395	0.00105429	-0.0629948	0.0415586	-0.0478169	0.0478704	-0.0489948	0.0222701
NUB1_Q9Y5A7	0.0202337	-0.000241964	0.0219482	0.0344867	-0.0135943	-0.0308069	0.0312974	0.0264347	-0.0193721	-0.0748998	-0.00100038	0.00415545	0.000241924	-0.0228771	0.0479182	-0.0490973	-0.00535343	-0.000467834	0.000467683	-0.00545288	0.0577921	-0.0419654	0.0389075	-0.0201243	-0.0445606	-0.0519132	0.0367841	-0.0157055	0.0567823	0.0203996	0.045913	0.0204428	0.0503113	-0.01801	0.00918416	0.0186435	-0.00188725	-0.00525745	0.0071381	-0.0251931	-0.00825775	-0.0516349	0.0249758	0.00359587	0.0547084	-0.0283386	-0.0198287	0.00188478	-0.099632
NUB1_Q9Y5A7-2
NUB1_H7C5N1
TARBP2_Q15633	0.170963	-0.02612	0.153817	0.0315704	-0.122477	-0.0727215	0.139441	-0.145267	-0.15427	0.0975578	0.026643	-0.0119901	0.0072228	-0.0044515	-0.0299285	0.00443781	-0.0338129	0.0287915	0.0192701	0.0253397	-0.0111315	-0.0295676	0.0382304	-0.0365135	-0.0743885	-0.112036	-0.0931789	-0.0662965	0.0569888	0.0455584	0.0110463	0.0199903	-0.0368938	0.0276219	-0.0239744	-0.0872999	0.103494	0.0355394	0.0141789	0.0559501	-0.075028	-0.00165966	-0.129473	0.0770449	0.024296	-0.0618192	-0.00628461	0.00165775	-0.30051
EHBP1L1_Q8N3D4	-0.0196902	0.0104171	0.0398347	0.0410258	0.0200223	-0.00930836	0.0176407	-0.00987373	-0.063794	-0.0815789	-0.00364593	-0.00261289	0.0169556	-0.0138516	0.00260816	0.0267581	0.0587308	0.0752541	0.0767341	0.0245603	0.00503544	-0.0890404	-0.0364362	-0.0895149	0.0361563	0.0019205	0.00989844	-0.0179223	-0.0189968	-0.00192306	-0.0488962	-0.0059463	-0.00199481	-0.0257148	-0.00037331	0.1337	0.000373214	0.0450749	0.00415767	0.0501421	-0.0409207	-0.0197323	0.0296841	0.0805358	0.00842862	-0.0270212	-0.0242145	-0.0164184	-0.218819
EHBP1_Q8NDI1-2	-0.19111	-0.0471556	0.118673	-0.00335733	-0.0280623	0.00334953	0.0469432	-0.12019	0.0240444	-0.23354	-0.0710912	-0.0870574	0.0733904	0.00400191	0.0279191	0.0101768	0.0578237	-0.0338686	0.068658	-0.0169542	0.114126	0.0534207	-0.00567569	0.0543736	-0.0104167	-0.0566044	-0.044262	-0.0963717	0.130806	0.0102503	0.00565345	-0.0524713	-0.0239983	0.0443435	-0.0172255	-0.00326699	0.0359664	-0.0793427	0.0713066	0.0190627	0.135449	-0.0206888	0.028565	-0.00815117	-0.021892	-0.00668766	0.0217879	0.00325961	-0.23091
BAZ2A_Q9UIF9																	0.140512	0.0579142	0.331355	-0.0123048	-0.25863	-0.101686	0.0578403	-0.322969	-0.0433163	-0.00619435	0.418275	0.100851	0.0154294	-0.0391626	0.00616787	-0.0768045																	-0.294387
CLIP2_Q9UDT6	-0.12785	-0.0492739	-0.0256896	-0.00848371	0.0141383	-0.0591485	0.192162	0.168108	0.00843411	0.0146664	0.0567518	-0.157718	0.163059	-0.0394187	0.110253	-0.0267122	-0.0774405	0.0484606	0.0801043	0.0418369	-0.206742	-0.16108	0.0156761	-0.0158483	-0.546684	0.0956902	-0.160082	0.173273	-0.0357126	-0.241542	0.110633	0.178448	0.114993	-0.233975	0.207449	-0.0340472	-0.114477	0.14092	-0.302903	0.0335681	-0.147964	0.11153	-0.0895251	-0.0456047	0.222522	0.0332622	0.0833847	-0.193538	-0.310718
CLIP1_P30622-1	-0.0475337	0.0610275	-0.0416779	0.0191454	-0.00681322	0.0236987	-0.0295991	0.0138082	0.00121594	-0.0077009	-0.0339863	-0.00121697	0.0300704	0.0505023	-0.00684334	0.0384455	-0.0118627	0.0324861	-0.0468296	0.0264693	-0.0501446	-0.0601428	-0.0408224	-0.005242	0.00522302	0.034478	0.0392996	0.0329776	-0.0487604	0.010228	-0.0245765	0.0147524	-0.0691555	-0.000562792	-0.0377062	0.0392323	-0.00366902	0.0108919	-0.016931	0.0592635	0.000959009	0.0438726	-0.0440856	0.0275511	-0.0556131	0.000562573	-0.0473752	0.0157313	-0.140917
CLIP1_P30622-2	-0.130146	0.199585	-0.150704	-0.015089	-0.160994	0.0882172	-0.0740437	0.0149329	0.144701	-0.0834956	-0.124317	-0.0399345	0.203078	0.0170179	0.0967583	0.197307	0.0576007	0.147054	0.00195009	-0.00195273	-0.0950595	-0.880904	-0.155045	-0.0518583	-0.0335779	0.0745709	0.227891	0.042186	-0.0427082	0.0383143	-0.00525253	0.0641772	-0.086456	-0.0618504	-0.0347009	0.0147639	-3.34466e-05	-0.105585	3.34458e-05	0.0568082	0.0687864	0.0287464	-0.0033196	0.179256	-0.0917582	0.110215	-0.19872	0.147946	-0.192317
CLIP1_A0A3B3ITA2																	-0.237658	0.548172	0.194944	0.34242	-0.199195	-0.830717	-0.0592921	-0.383769	0.639848	0.628838	0.616395	0.483178	-0.227674	-0.0178391	0.0176212	-0.0893145
HNRNPM_P52272	0.266351	0.0267115	0.175399	-0.0174013	0.186733	-0.0612953	0.0846892	-0.017182	0.0290908	-0.0861489	0.105664	-0.00384078	-0.0779773	-0.1208	0.00383058	-0.0663975	0.0546202	-0.024218	0.14764	-0.0425936	0.0109855	-0.0458913	0.00614908	-0.0288494	0.0359104	-0.0552141	0.0466212	-0.0061754	0.0580816	-0.0303463	0.0238817	-0.0434322	0.0510492	-0.00266564	0.076321	-0.055407	0.00266072	-0.0465329	0.0661552	0.0439811	-0.0581362	-0.160076	-0.0467068	-0.0882493	0.018912	-0.0688345	0.0442249	0.0788731	-0.0287847
HNRNPM_M0R019
HNRNPM_M0QZM1	0.337488	-0.184139	0.478694	-0.020262	0.0199814	0.131971	-0.263929	0.0802301	-0.172801	-0.312385	0.397656	0.0943072	-0.130613	-0.0545932	0.210627	-0.203921																	-0.0129956	-0.125262	-0.161639	-0.165189	0.0128796	-0.133243	-0.063753	-0.0684931	-0.0680702	0.0248169	0.16014	0.0949231	0.11799	0.186625	0.200781	0.0409884	-0.463225
VPS13C_Q709C8	0.257694	-0.0104781	0.182694	0.0568841	0.0660609	-0.0192339	-0.0235117	0.0199359	-0.0703521	-0.0374483	0.0104025	0.0231415	-0.0452893	-0.177376	-0.0643608	0.0422586	0.0994212	0.0970717	0.278599	0.14778	-0.00272028	0.00271516	-0.0191154	-0.110881	0.0469459	-0.00632818	-0.0375922	-0.0717205	-0.018116	0.0341132	-0.0773368	0.0925719	-0.104208	-0.0466306	-0.010611	-0.0665734	0.0187842	0.0228384	0.0105336	0.0463506	0.016082	-0.0381568	0.0304388	0.0156743	-0.0155351	0.0511554	-0.094579	-0.0381425	-0.108108
PALMD_Q9NP74	-0.0619855	-0.0248113	-0.123363	-0.00158347	-0.0378907	-0.104547	-0.205497	0.0992673	0.103959	0.0216758	0.109341	-0.025715	0.222408	0.0378885	0.184325	0.00158174	-0.0506432	0.0263407	-0.0829178	0.000291319	-0.000291378	0.140261	-0.0503463	-0.0626523	0.0368619	0.00339429	0.0217103	0.0793524	-0.0960191	0.0143651	-0.091172	-0.0233182	-0.103672	-0.0277356	0.0219376	0.0791362	-0.0146627	0.0766939	-0.0796604	-0.0293474	-0.0507181	0.0768397	-0.0574282	0.024048	0.0475145	-0.0627326	0.0736185	0.0145151	-0.199536
VPS13A_Q96RL7	0.318868	0.0896824	0.145275	0.0218853	0.079222	-0.0220034	0.0201462	0.0786271	-0.066611	-0.0204315	-0.0587934	-0.088242	-0.0255749	-0.0868523	-0.0347264	0.0561363	0.0553789	-0.0440906	0.134493	0.105532	-0.00889109	0.0071717	0.0572344	-0.0483357	-0.0288582	-0.109698	-0.00720752	-0.0793323	0.0181588	0.0726012	-0.0915132	0.00992864	-0.0529277	-0.116889	-0.0540178	-0.0945504	0.131784	-0.0588115	0.0111533	0.0710899	-0.0252268	-0.00685567	-0.0274561	0.0245265	0.0915737	0.00682325	0.0192209	0.0207714	-0.213202
GALNT12_Q8IXK2	0.107137	-0.0436511	0.113038	0.0441719	0.0935303	-0.0095271	-0.0182211	-0.0237774	-0.0503434	-0.166661	0.0281664	0.00132386	0.0351644	-0.00132508	-0.0322788	0.0380785	0.00807112	0.0593181	-0.00453578	0.0691757	-0.0431385	0.123204	-0.119905	-0.0711868	-0.0929352	-0.119888	0.00877493	-0.108769	-0.035296	0.0499581	0.00452156	0.0249412	-0.0474619	-0.0664938	0.159673	0.205123	-0.0103774	-0.275556	0.169681	0.107489	0.0329546	-0.106105	0.0103033	-0.0815218	0.21622	-0.265418	0.0483929	-0.0820188	-0.117658
GALNT4_Q8N4A0	0.0713414	-0.164549	0.102115	-0.0320638	0.159308	-0.0294323	0.110437	-0.0707266	-0.0479522	0.0449981	-0.0411765	-0.173003	0.204039	0.0206813	0.0999465	-0.0209821	0.117617	-0.0427549	0.0792428	-0.0130383	0.00874214	0.0394422	-0.00879543	-0.0914228	0.036088	-0.11157	0.0817577	-0.0464469	0.0816485	-0.0348281	0.0486224	-0.0882506	-0.0124563	-0.0689561	0.221343	0.0169872	-0.0309589	0.0561941	0.0604203	-0.00263741	-0.0318735	-0.130571	-0.113232	-0.0983216	0.0884556	0.00263259	0.124386	0.0670533	-0.00603413
GALNT2_Q10471	0.0516491	0.014899	0.0353351	-0.0294071	-0.0178494	-0.0609462	0.0169618	-0.0343527	0.0674144	-0.0721118	0.033199	-0.0408798	0.0502518	-0.0150544	0.0174234	-0.0255113	-0.010242	-0.115277	-0.0242197	0.384991	-0.0213584	0.150805	-0.00752443	-0.14084	0.00748539	0.0620329	0.250904	0.292372	0.037351	-0.0785877	0.0116798	-0.149391	0.0629298	-0.0145778	0.0222109	-0.00702708	0.0342178	-0.12184	0.0422526	-0.0495768	0.048037	-0.0423363	-0.0353951	-0.0786756	0.053317	-0.0455284	0.054119	0.00699302	-0.0528185
GALNT5_Q7Z7M9	-0.00736423	-0.00802163	0.0320298	0.0240848	-0.0476349	-0.0062522	-0.0260104	0.0121648	0.0721426	-0.0420597	-0.0542654	0.00622523	0.0393198	0.00983736	-0.0163779	0.0297274	0.0292712	-0.00315629	0.0488411	0.0830524	0.00154382	-0.0128218	-0.0157365	-0.0193009	-0.00154548	-0.0897565	0.0418685	0.00895239	-0.0318887	0.0152489	0.010123	-0.0315603	-0.0371875	0.0131646	0.0119231	-0.0318509	-0.00686151	-0.0844599	0.0508656	-0.0252871	0.00682903	-0.0402659	-0.0357372	-0.053818	0.0390578	0.013817	0.0429589	0.0322343	-0.0637131
NECAP2_Q9NVZ3	-0.0516022	0.0228745	-0.0304021	0.00936194	-0.0749824	-0.00942309	-0.0836898	0.0580239	0.103455	-0.0222955	0.0277425	-0.032129	0.0450932	0.0978896	-0.0557786	0.0465111	-0.0595364	-0.011879	-0.0581897	0.01038	0.013297	0.0738521	0.0333748	0.0614105	-0.0443921	0.040986	-0.0559562	-0.0208988	-0.0104552	0.0709364	-0.0230107	0.0270833	-0.06848	0.0194006	-0.0371326	0.0359103	-0.0733079	0.0266052	-0.0263102	-0.00407922	-0.000361335	0.100017	-0.00998088	0.0338124	-0.00864022	0.00354966	0.000361245	0.0021396	-0.154241
FLII_Q13045	0.0471692	0.022695	-0.0104522	-0.0091395	0.0727801	-0.0532646	0.00779491	-0.0734446	0.0223503	-0.0856225	0.0211204	-0.0304827	0.0977376	-0.00783726	0.0277045	-0.0516521	-0.0204152	-0.0606068	0.0273655	-0.0212308	0.0306054	0.0560375	0.0886744	-0.00476011	-0.0362443	-0.0868672	-0.0280755	-0.0631701	0.0549535	0.0246461	0.0228968	0.00474445	-0.0219557	0.00110989	0.0265719	-0.00967511	0.0131212	-0.0480324	-0.0128325	0.0270603	-0.00111075	-0.0481943	-0.0456766	0.00197741	0.0109464	0.00238223	0.011223	-0.0490473	0.0124465
FLII_Q13045-2																																																	-0.0243301
AQR_O60306	-0.0189846	0.0131489	-0.0561189	0.080995	-0.0722514	-0.0399897	-0.0394126	0.0109606	0.0283026	-0.132688	0.0926406	0.0629222	0.0388282	-0.0110445	0.0406101	-0.0178916	-0.00140776	-0.0223506	0.0101017	0.00348298	-0.0804272	-0.0428124	0.0420434	-0.0112787	0.0578667	-0.0376401	-0.0245185	-0.0525468	0.0289568	0.0511087	0.00140639	0.017952	0.0818996	-0.0232903	0.00260814	0.02604	0.0715074	-0.00261287	-0.0304403	-0.0671584	-0.0375149	0.0283838	-0.0430731	0.0167356	0.0249798	-0.00458746	0.0292161	-0.0359005	-0.0424497
RRP12_Q5JTH9	0.0518814	-0.0498867	0.00305755	0.0228966	0.0144806	-0.0356362	0.00631965	0.0351637	-0.0824616	-0.0595648	-0.00306404	-0.0417434	0.0117172	-0.0695562	0.0452795	-0.00994151	0.0216468	0.00127216	0.0729244	-0.00920473	-2.6636e-05	0.0377021	0.0624912	-0.027398	-0.016142	-0.0962633	-0.0700667	-0.0844249	0.107438	0.0366954	-0.0191549	2.66355e-05	0.0110542	-0.0191162	0.0177182	0.0339618	0.083251	-0.0368938	-0.0159465	0.016331	-0.0369841	0.0180636	-0.049967	0.0207989	0.0373332	-0.0501996	-0.0111396	-0.100048	-0.00384994
CAD_P27708	0.0248537	0.0107967	0.0340353	-0.0414874	-0.01275	-0.0270483	0.0248583	-0.00677733	-0.0651904	-0.0387142	0.0201886	0.00674564	0.0183885	-0.0396301	0.00897343	-0.0266155	0.0626038	0.028671	0.087463	0.0515789	-0.0297426	-0.139877	-0.0115042	-0.036453	0.0153575	-0.00907142	0.00901474	-0.0460935	0.0224889	-0.0194706	0.00415064	-0.00416262	0.0300173	-0.00958275	0.0582456	0.0180214	0.0106065	-0.0317218	0.017953	-0.0265943	-0.0732047	-0.115363	-0.00173297	-0.014538	0.0493602	-0.00496183	0.0504465	0.00173089	0.0267727
SEC24D_O94855-2	0.024521	-0.0217454	0.0103672	-0.0138309	-0.0483529	-0.0121425	0.0139872	-0.00286643	0.0355137	-0.0881489	0.0766083	-0.0122541	0.0203117	-0.0258034	0.00667621	0.00286074	0.00429416	-0.00168341	-0.0179845	-0.0194882	0.0300041	-0.0315739	0.0346218	0.0264377	0.00427578	-0.0220016	0.00168145	-0.0407549	0.0495521	-0.0320734	0.00924899	-0.0326603	0.0345318	-0.0586651	-0.0111354	0.0146615	0.0333995	-0.000193607	-0.00820495	0.0185346	0.0162758	-0.0245686	-0.00938754	-0.00605097	0.066237	0.000193581	0.0182889	-0.0404207	0.237635
SEC24C_P53992	0.0076445	0.00735784	0.00311327	0.000490924	-0.0405197	-0.0253457	0.0309382	-0.0156306	0.00807323	-0.00412991	0.0250508	-0.0531117	0.026113	-0.0504713	-0.000491091	-0.00791467	-0.00158339	-0.0261542	0.0218177	-0.0304233	0.00649868	-0.106943	0.00495113	-0.0321736	0.0274876	-0.00216736	-0.0128009	0.00125924	0.0603749	0.023252	0.0522031	-0.00126034	-0.0374315	-0.0120534	-0.0138281	-0.0134465	0.0432165	-0.0498269	0.0460526	-0.00610091	0.0149088	-0.0389037	0.00610047	0.00607522	0.0248107	0.0361431	0.0452173	-0.0264558	0.111362
RNF213_A0A0A0MTC1	0.0292423	-0.0273648	0.068328	0.0839799	0.0142352	-0.0418462	0.0390629	-0.0540177	-0.0344656	-0.097696	0.0448203	-0.014377	0.0456058	-0.0850736	0.0640537	-0.0350238	0.0927422	-0.0144995	0.102997	0.000272441	-0.000272492	-0.100688	0.0298067	-0.115633	0.0431663	-0.148302	-0.0816157	-0.164704	0.0893756	0.000835629	0.0495992	-0.0564588	0.0452131	-0.0630966	0.0734424	-0.00357651	0.058101	-0.0417927	0.0507856	0.00356766	0.0143712	-0.0680526	-0.00815543	-0.0717026	0.0586133	-0.0508438	0.0578814	-0.0423324	-0.00109836
CPS1_P31327-3	0.0540586	0.0993955	-0.038792	0.0182617	0.0324476	-0.0378859	0.00732036	0.0201551	-0.0311892	-0.0242361	0.0701683	-0.0238042	0.0386741	-0.0415186	-0.0202086	-0.00735769	0.0146638	0.0685709	0.11995	0.0785861	-0.00944028	-0.0655008	-0.0118954	-0.0450448	0.00349484	0.0212596	0.0836504	0.120676	-0.102512	-0.0270542	-0.0414681	-0.00350333	-0.0192266	0.0260726	-0.0912904	-0.00139424	-0.0305167	-0.122509	0.119731	0.00139289	0.120968	0.0633551	0.179597	0.047171	-0.0287415	-0.278968	0.00658395	-0.082042	-0.0616173
CAD_H7BZB3																	-0.0827385	0.00905508	0.0915669	0.0233139	-0.00911227	-0.0307468	0.0211278	0.116194	-0.0271725	-0.027028	-0.0258916	0.0986248	0.0890274	-0.0952719	-0.0918961	0.101145																	-0.124593
TIA1_P31483	0.00179958	-0.0313568	0.0133309	-0.109192	0.00393215	0.0258035	0.0125112	0.0380838	-0.00332919	0.0257286	-0.00577865	-0.0129446	-0.00180183	0.0612639	-0.0375246	-0.00322037	-0.0793804	-0.0559575	0.00343906	-0.0159873	-0.0060338	-0.0470564	0.0654998	-0.0120196	-0.00344728	0.0136673	0.114944	0.00767325	0.0176685	0.0294296	-0.0317487	0.042359	-0.0286915	-0.0560151	-0.0968591	0.0504389	-0.0171931	-0.0842163	0.0997979	-0.0212713	0.000767894	-0.0243856	0.138738	0.153462	0.056056	0.0429354	-0.000768303	0.159781	0.393621
TIAL1_Q01085-2	-0.00811691	0.00206905	0.0292281	-0.0756061	-0.0732935	-0.0536148	0.0134801	0.0205343	0.0354362	-0.0352762	-0.00207202	-0.03604	0.0549884	0.0817798	-0.0129623	0.0489599	0.0223038	0.00192276	0.00346556	-0.00192532	-0.064513	-0.086616	-0.0144121	-0.0344502	0.0235481	0.0887852	0.0732192	0.0340388	-0.0225556	-0.0201136	-0.0217006	0.0113793	0.0358369	-0.0202528	0.0542442	0.00212434	-0.0482065	0.0193557	-0.00657028	-0.033516	-0.0245289	0.0743382	-0.00212747	-0.00865989	0.029705	0.0318639	-0.0108432	0.0409093	-0.163935
YWHAE_P62258	-0.144646	-0.0305005	-0.00141401	0.0203745	-0.00548716	0.0093758	-0.0005966	-0.0248318	-0.00376027	0.000596353	-0.017344	0.0133044	0.019282	0.0442732	0.0108377	0.022466	-0.0211568	-0.00589372	-0.0482746	0.0117271	-0.0225694	0.0432603	-0.0277751	0.0302407	0.0163933	0.0527416	0.000348383	0.0205371	-0.0276222	-0.000348467	-0.0125958	0.019636	-0.0430302	0.0475399	0.0106762	-0.0114255	0.00118554	0.0312414	-0.0285704	-0.00118652	0.0155192	0.0469013	-0.0270766	-0.0106884	-0.0302118	-0.0163576	0.0119171	0.00649928	-0.11127
SFN_P31947	0.00705465	0.020288	-0.0437521	-0.00708932	0.0532234	0.18107	-0.0295941	-0.0354195	0.119639	-0.0258606	-0.0131967	0.00917102	-0.0559426	0.133119	-0.0258015	0.0564811	-0.0714025	-0.068226	-0.122475	-0.111972	0.282381	0.76045	0.276495	0.417364	-0.121922	-0.046373	-0.110187	0.0250278	0.117239	-0.0254696	0.0380889	0.0624045	-0.035567	-0.000861329	0.024819	-0.00945629	-0.0687821	0.0103191	-0.00464938	-0.00166276	0.120847	0.0543973	0.00164461	-0.035931	-0.022132	0.104898	0.000860815	0.0614295	-0.184524
YWHAB_P31946	-0.0299359	-0.0187025	-0.00680804	-0.0423719	0.0591655	0.0448933	0.0216248	-0.00912264	0.0522047	0.0855684	-0.0126331	-0.0224742	-0.0358838	0.0256202	0.00677606	0.0365619	-0.0770669	-0.0812716	-0.0919792	-0.0751828	0.178181	0.501512	0.168868	0.296629	-0.0922387	-0.053757	-0.0768859	-0.00599659	0.0497041	0.0157864	0.00597177	0.00861029	-0.0677426	-0.00841132	0.044972	0.00600755	-0.0442925	0.0192617	-0.0226955	0.0244834	0.0945258	0.0430338	-0.00603267	-0.0132319	-0.0108196	0.107031	-0.0205283	0.0240001	-0.0597353
YWHAQ_P27348	-0.0533342	-0.0283167	0.0250009	-0.0715232	0.0597228	0.0166498	0.0756815	-0.0335278	-0.135137	0.049022	-0.023573	0.056844	-0.00827898	0.0119038	0.00823174	-0.0309211	-0.0239313	-0.0427553	-0.0967185	-0.0939878	0.51248	0.737312	0.441334	0.490673	-0.0952834	-0.0895054	-0.0966988	-0.0804967	0.338558	0.0235408	0.23018	0.0906638	-0.0286585	-0.059436	0.0372732	-0.0149795	-0.0169658	-0.00791409	0.0372754	-0.0621985	0.0745516	0.00516761	0.0519276	-0.00518619	0.0445271	0.108408	0.0225685	-0.00857421	-0.043297
YWHAZ_P63104	-0.119573	0.00390632	-0.0805102	-0.0299886	0.0344845	0.0359885	-0.0254356	-0.00478005	0.0787419	0.0693221	-0.0132769	-0.0128462	0.000480941	0.0163893	0.00492982	-0.000481101	-0.0146897	-0.000274566	-0.0375425	0.0193686	-0.0101497	0.000274513	-0.0436432	0.0182756	0.00442966	0.0848749	0.00152877	0.0193732	-0.010101	-0.0195971	-0.0370311	0.0301429	-0.0552092	0.0720966	-0.0266571	0.00306167	-0.0201269	0.0619549	-0.00313754	0.0482449	0.0484814	0.0567474	-0.0172172	-0.00306818	-0.0411212	0.0180147	-0.00372493	0.0635806	0.184704
YWHAZ_E7EX29	-0.060092	0.186383	-0.169537	0.465143	-0.0637195	-0.183426	-0.00863549	-0.0306137	0.322045	0.107593	0.271457	-0.0015174	0.00151581	0.0933881	0.0640672	-0.00853903																																	-0.150568
YWHAZ_E7ESK7	-0.0947883	0.106041	0.0458074	0.245327	-0.147889	-0.0363269	0.0656758	0.863916	0.373843	-0.0368373	-0.210223	-0.205846	-0.164775	-0.0841699	0.0354346	0.19687	-0.267946	0.0846642	-0.364891	0.331305	0.155145	0.0733629	-0.030603	-0.00663109	0.0461287	0.221645	0.178713	-0.0685099	-0.168643	-0.0301402	0.00660075	-0.033125	0.0659715	0.0670089	-0.196752	0.078736	-0.0715691	0.204885	0.00826365	-0.0444652	-0.232546	0.0619757	-0.0975539	-0.0737557	0.100111	0.153761	-0.00831126	-0.233397	-0.298649
YWHAG_P61981	-0.100882	0.0227304	-0.0509527	-0.0144417	-0.00177551	0.0347828	-0.00202751	0.00330376	0.104981	-0.0489736	0.00666778	0.00177333	-0.0102104	0.0864357	0.0157587	-0.0134602	0.00279917	0.0199822	-0.0207219	0.0434031	-0.00543275	0.000541344	-0.047732	0.0380765	0.0110669	0.0614645	-0.00832575	0.0258522	-0.000541547	-0.0665243	-0.0194973	-0.0197993	-0.105279	-0.0113851	0.01732	-0.0346532	-0.00824447	-0.0229676	0.0612255	-0.0276813	0.093828	0.00910191	0.0369607	-0.0188937	-0.00487894	0.0410015	0.00486249	0.00938639	0.0788884
YWHAH_Q04917	0.000938963	-0.000939575	-0.0795824	-0.0207194	0.0554636	0.0333331	0.0104192	-0.0592787	0.0863184	0.0400293	-0.0740704	-0.00826188	-0.00811995	0.00972996	0.00943809	-0.0083154	-0.0423613	-0.063299	-0.125882	-0.0611879	0.16116	0.25894	0.192965	0.226901	-0.102346	-0.0628543	-0.0983829	-0.0604712	0.125728	0.0418542	0.132109	0.0411528	-0.0636749	-0.0201023	0.0496839	-0.0454295	-0.0436496	0.0274956	-0.000569226	-0.0542663	0.0662846	0.00992297	0.000569001	-0.0343821	0.0108647	0.0333331	0.0103388	-0.00324018	0.182082
LRSAM1_Q6UWE0	-0.00353613	0.0190938	0.00352748	0.0767164	-0.0189607	-0.0229938	-0.0110471	-0.0037704	0.044792	0.0447965	-0.0169648	-0.0394871	0.0263476	-0.0452793	0.0476556	0.0474698	0.00473868	0.000893952	0.00973189	0.0180865	-0.0290316	-0.0626855	-0.000257996	-0.0413835	0.040902	-0.00799847	0.00725011	0.00025795	0.00100493	-0.0224132	-0.0322149	-0.0697029	0.00573686	0.0206593	0.0186416	-0.0149552	-0.00381448	-0.0323616	-0.0425125	-0.0519076	0.0137869	0.0262772	0.0398446	0.051101	-0.00113298	-0.0013576	-0.0207669	0.00113209	0.23759
LMAN1_P49257	0.0283077	0.0354502	0.00268643	-0.02426	0.0124643	-0.00344844	0.00806729	0.00106224	-0.0588434	-0.0359454	-0.0165913	-0.00933978	0.00651355	0.0465892	-0.00106303	-0.0394833	0.00340911	-0.0420937	0.0510166	-0.00456152	0.0943664	0.119623	0.0478736	0.0810562	-0.0244468	-0.0645104	-0.0404036	-0.0858092	0.0334868	-0.00341718	0.0337847	-0.00927584	-0.00484079	-0.0246547	0.0780076	0.0048246	0.0714623	-0.0518151	0.0232861	-0.042592	0.102528	-0.0198408	0.0680837	0.0243109	-0.0122747	0.0631967	-0.00751342	-0.0668592	0.0109955
LRBA_P50851	0.0504621	-0.00771258	0.0271058	0.015751	-0.0102218	-0.0136665	0.00304751	0.00421872	-0.0795498	-0.023905	-0.00606692	0.00180394	0.0220304	-0.0279752	-0.00133972	0.00133847	0.0805908	0.0528636	0.0936962	0.0541083	-0.0123188	-0.0875452	-0.0193248	-0.0777861	0.0583082	0.00749947	0.0535439	-0.00726273	0.00144448	-0.00710741	-0.0179578	-0.00144593	0.018729	0.0292944	-0.00842822	0.0242766	0.00565898	-0.00657085	0.0049557	0.0231375	-0.0368943	-0.0240938	-0.00527604	-0.00497278	0.00737898	-0.013067	0.0264593	-0.0154596	-0.0337538
LRBA_A0A494BZW2	0.0485444	0.0564575	0.051049	0.0666146	-0.0383253	-0.0219118	0.0033417	-0.0295228	0.00276833	-0.0728854	-0.119269	-0.00277365	0.0825699	-0.0231167	0.048905	-0.0534026	0.0573785	0.0550365	-0.0143302	-0.0347359	0.0141892	-0.0820444	-0.107683	-0.0333743	0.080894	0.0398182	0.118404	-0.118994	-0.0779179	0.155795	0.0393087	-0.0672512	0.0788104	0.213147	-0.0457367	0.11906	0.113487	-0.0860683	0.00514125	0.129897	0.0508276	-0.249364	-0.0360787	-0.00515964	0.0686552	-0.135524	-0.0544705	-0.0676215	-0.195283
NBEA_Q8NFP9	0.0508021	0.000339822	-0.0121251	-0.000339902	-0.00407951	-0.0590202	0.0195808	-0.0356422	-0.0787446	0.0273303	0.087647	0.00354811	0.0134876	-0.0517256	0.0557109	-0.0961824	0.0711008	0.0928758	0.0255017	0.215505	-0.0928601	-0.0663976	-0.119109	-0.0870383	0.11129	0.0887422	0.0868321	0.0301868	-0.0907164	-0.0259606	-0.117072	-0.110847	0.0358853	-0.00382161	0.00381151	-0.0343247	0.0339285	-0.0318693	0.0460012	0.113077	0.0274024	-0.147476	-0.00420157	-0.0807006	0.00420768	-0.0474523	0.0044229	-0.125234	-0.00935348
CPT1A_P50416	0.0680238	-0.028798	0.0400773	0.0569146	0.0302795	-0.00177838	0.111358	-0.0507236	-0.011967	-0.100027	-0.0127543	-0.0870905	0.110462	-0.0267944	0.00177619	0.0823408	-0.031786	-0.00966187	-0.051496	-0.00277551	0.00435542	-0.00507435	0.00277018	0.015933	-0.126358	-0.14695	0.110975	0.0030897	0.0273152	-0.00511891	0.405902	0.408918	-0.0635505	-0.0697205	0.0437174	-0.0285155	0.0639975	-0.0217049	0.03026	-0.0382977	0.0496183	-0.0201352	0.175924	0.0504422	0.120452	0.019858	-0.0294383	-0.0521949	-0.0757804
WDR75_Q8IWA0	0.174104	-0.0911436	0.0728653	0.116353	-0.00374997	-0.0675507	0.145761	0.197126	0.00374025	-0.10766	-0.021678	0.0216058	0.11511	-0.0566454	-0.0105301	-0.0366811	-0.0331463	0.00230557	0.00881142	-0.062616	0.0181575	0.0430476	-0.0642826	-0.0808878	0.00615868	-0.128958	0.140101	-0.00230926	0.0466958	0.03403	-0.0482105	-0.0733712	-0.0208548	-0.0482816	0.0760221	0.0151337	0.0240306	-0.00636255	0.0594122	-0.0135627	0.00633461	0.0226329	-0.0309291	-0.0314074	0.0287285	-0.0650602	0.0130384	-0.0165494	-0.4486
AP5B1_Q2VPB7	-0.0917391	0.0666116	0.0350297	0.0352476	0.0114441	-0.103387	-0.0354037	-0.0115356	0.0498602	-0.161333	-0.103133	-0.0347669	0.195228	-0.0363971	0.110778	0.113853	-0.0330009	-0.00413845	0.0635348	0.0299676	-0.0399811	0.0444483	0.00412661	0.0632815	0.0685301	0.0217227	-0.0917256	-0.092334	-0.056569	0.0513725	-0.111551	-0.0702221	0.0789039	0.0522817	-0.0141411	-0.13045	0.0228706	-0.0464424	-0.0427748	0.0140038	0.0628199	0.0672071	-0.0583977	-0.126535	0.101972	-0.189464	0.0599304	-0.194535	-0.100684
DFFA_O00273	-0.0333344	-0.0100293	-0.00460118	-0.0822943	-0.0705276	0.0844961	-0.0605162	0.0128938	-0.0155341	0.105205	-0.0189173	0.0629017	0.00458655	0.0387121	0.00979019	0.0697489	-0.0428593	0.0173105	-0.0279135	-0.0302253	0.067466	-0.0457297	-0.0324746	0.0308208	-0.0138209	0.0553979	0.0366275	0.0558161	0.0136898	-0.1012	-0.0155142	0.0291474	-0.0930046	0.00680764	-0.0475589	0.00956169	-0.0851499	0.0383846	-0.0585875	-0.0107291	-0.0801921	0.0780615	-0.000607015	0.0367718	-0.0343107	0.0394872	0.00060676	0.0524135	0.461641
DFFA_O00273-2	-0.16293	-0.0482816	-0.0610609	-0.164395	0.165765	0.0876112	0.314632	0.0160138	-0.06195	-0.0161936	-0.248717	-0.158722	0.116041	0.093221	0.0795147	0.137201	-0.147318	-0.270435	-0.100687	-0.0993123	0.129187	0.16079	0.0664232	0.121779	-0.0301495	-0.0714942	-0.0828283	0.0985054	0.0295323	-0.0713677	0.125682	0.0329508	-0.122666	0.0301423	-0.013311	0.0193308	-0.15067	0.0131893	0.0721423	-0.184608	0.123609	-0.0482613	0.340061	-0.176357	0.260251	0.131142	-0.15673	-0.164397
SRRM2_Q9UQ35	-0.032157	-0.00353987	0.00704001	-0.0373262	-0.0151368	0.0235771	-0.0582812	0.0492	0.0035312	-0.0442346	-0.0693288	-0.10511	0.0765974	0.0603684	0.0128691	0.127077	0.00107317	0.0610616	0.0125571	0.044913	-0.0506327	-0.0345727	-0.134372	-0.0734277	0.0523717	0.0282831	-0.00107397	0.0402577	-0.0654972	0.020114	-0.169095	-0.0781262	-0.0864999	-0.0252286	-0.0361007	0.0364994	0.00330112	0.0416912	-0.027862	0.0248358	-0.0298855	0.0531755	0.0463598	0.0814924	-0.027916	0.0390315	-0.0132317	-0.00330869	-0.188596
SDHA_P31040	-0.0342988	0.0100064	-0.0804182	0.016556	-0.000321188	-0.0209711	-0.0245553	0.000321117	0.0450343	0.00614654	-0.0271663	0.0378638	0.0580116	0.170626	-0.0166781	-0.0138481	0.00409292	-0.00879026	-0.0338493	1.61731e-05	-1.61732e-05	-0.0441585	-0.0399505	0.0321155	0.0136935	0.0253912	0.0288898	0.0315709	-0.00592691	-0.00805123	0.00402841	-0.0116919	-0.0183631	0.0317551	-0.0630624	-0.00195018	0.0126621	0.0140494	-0.00911225	-0.0314352	-0.0123081	0.0434849	0.00246891	0.00194755	0.0191564	-0.00855898	0.0198744	-0.00381149	-0.0486023
SLC25A19_Q9HC21	-0.00837	0.0338541	-0.00792427	0.039898	-0.00749733	0.0413487	-0.0237984	0.0429376	0.0131679	-0.0228716	-0.0106498	-0.00462874	-0.00308146	0.0030749	0.0384753	0.050681	0.0179646	0.106081	-0.0181911	0.10656	-0.0434881	0.0398992	-0.026631	0.045493	-0.0393042	-0.0305601	-0.0392732	0.0298035	-0.0715757	0.114684	-0.0723392	0.0882075	-0.0288226	0.133351	-0.0229447	0.0754237	-0.0552171	0.0225855	-0.0530055	0.0874204	-0.0498865	0.164733	-0.0642822	0.0920498	-0.0233385	0.0848824	-0.040009	0.118884	-0.0941025
FCSK_Q8N0W3	0.0278778	-0.00342385	-0.000709986	0.103909	-0.0156788	-0.0302882	-0.0412963	0.0369219	0.00488193	-0.0326002	-0.00699617	-0.0077595	0.000709637	0.0150489	0.0263102	0.086529	-0.00121354	0.00645923	0.00121252	0.0814547	-0.0770672	-0.168714	-0.0897457	-0.0933736	0.0945178	0.00311403	0.0233129	0.0381768	-0.0385601	0.00312785	-0.0403275	-0.0548254	-0.02011	0.0712327	-0.013438	0.0564519	-0.0039052	0.0403244	-0.0661608	0.0504015	0.0339939	0.0195967	-0.0345305	0.0409281	-0.0369535	-0.0942333	-0.0196232	0.00389466	-0.0458916
VPS51_Q9UID3	0.0650057	0.0119485	0.101558	-0.025815	-0.0131496	-0.0736103	0.0462207	0.0227213	-0.151193	-0.0381469	0.0328007	-0.0245138	0.0606858	-0.102323	0.0886175	-0.0120483	-0.0144382	-0.0509414	-0.0049395	-0.0393703	0.163261	0.123144	0.164285	0.0726523	-0.0391568	-0.103726	-0.0444264	-0.176561	0.108075	0.0522432	0.0988412	0.00492264	0.0850959	-0.00687343	0.0437094	-0.0242826	0.048453	-0.0163592	-0.0110886	0.050614	-0.0226265	-0.0419591	0.00842266	-0.0383021	0.0430353	0.00684083	0.0154202	-0.0295499	-0.0854653
CAMSAP1_Q5T5Y3-3	0.00412423	7.83161e-05	-0.0162198	0.0279633	0.0138441	-0.0221045	0.00898546	-0.0205242	0.0133169	-0.122512	-0.014248	-0.0571971	0.050185	-0.0733204	-7.83203e-05	0.00781751	0.0508356	-0.0779799	-0.104711	-0.06986	0.0901486	0.18431	0.151222	-0.0369954	-0.0084682	-0.0513337	-0.00401709	-0.0258671	0.0849002	0.0783154	0.0795323	0.00400594	-0.0185815	0.00162074	-0.0475947	-0.0134201	-0.00162256	0.0361164	0.00539845	0.0103332	-0.0236819	-0.0171123	-0.0312722	-0.00974197	0.0145329	0.0244413	0.0296657	0.0119104	-0.0519019
AARS2_Q5JTZ9	0.0911548	0.0883128	-0.0617471	0.119409	-0.055157	0.0744093	-0.113999	-0.0384452	0.0897171	-0.171754	-0.0901816	0.064657	0.0638299	-0.0355297	0.0170816	-0.0172863	-0.0208957	-0.0329193	0.0349521	0.00393001	0.0350447	0.0179942	0.147477	-0.00394074	-0.0169739	-0.0889994	-0.142608	-0.0986525	0.0949127	-0.00458312	0.114893	0.0123749	0.00221108	-0.0527027	0.0819928	0.0417159	0.0371734	-0.0125099	0.0522841	-0.0460581	0.0282767	-0.0647222	-0.0252657	-0.00966958	0.0850653	-0.00221447	0.0509411	-0.0112626	-0.0944547
XPO7_Q9UIA9	0.0547368	0.0344441	0.0244441	-0.000161755	-0.0102657	-0.0294309	0.0483045	-0.00563049	-0.0724295	0.000161737	0.0160983	0.00651748	-0.0218947	-0.0269051	0.0110029	-0.00836103	0.0832096	0.0486955	0.0868127	0.0671501	-0.0151797	-0.0761662	-0.0148342	-0.0656087	0.025046	0.00973652	-0.0269686	-0.0498273	-0.00170396	-0.00271758	0.00743039	0.00170195	0.00947486	0.0297278	0.0142051	-0.0087957	0.0500352	-0.00265739	0.0247235	-0.00633353	-0.0154903	0.0026525	-0.00527562	-0.0164295	0.0257203	-0.0568093	0.026265	-0.022249	-0.0106428
RANBP17_Q9H2T7	0.0791623	0.154665	-0.304217	-0.355272	0.0705553	0.128902	-0.0554299	-0.466006	-0.0234506	0.0310459	-0.00703087	0.138768	0.00699677	-0.388964	0.19115	-0.0804129	0.196481	-0.0102809	0.0125794	0.000204918	0.182867	-0.250469	0.10337	-0.15586	0.103317	0.24326	0.262591	-0.0951072	-0.197138	-0.0263227	-0.000204947	-0.152564	-0.119816	0.193537	-0.249274	0.0474809	-0.0427168	0.0783261	0.0532378	-0.0287788	0.0899429	-0.0712405	0.0317319	0.028216	-0.133102	-0.226284	0.0744301	-0.0520659	-0.338673
NUP133_Q8WUM0	0.119374	-0.0309164	-0.0195806	0.039383	0.00792725	-0.0271585	0.0422382	0.0500901	-0.00797105	-0.139452	-0.0125105	-0.0237577	0.0673604	0.0319106	0.0429982	-0.0115838	0.0206291	0.0972782	0.00553812	0.431259	-0.113853	0.0208316	-0.0369956	-0.113938	-0.00555946	0.0860773	0.207481	0.295422	-0.0330707	-0.0714401	-0.0894731	-0.0695415	0.0171124	-0.0563571	0.0698848	0.0416719	0.0436783	-0.0635519	0.0276752	-0.000457274	-0.0144882	-0.0377918	-0.0264257	-0.02922	0.0477699	0.00202135	0.000457129	-0.0403494	-0.205113
SMC6_Q96SB8	-0.00256378	-0.0180802	0.052105	-0.0245594	-0.0515773	-0.0675267	0.00992869	0.00255923	0.0615349	-0.0483751	0.00872364	-0.0268108	0.015668	-0.113839	0.0170537	0.0249199	-0.00583673	0.0158205	0.0349397	0.0224703	0.00581321	-0.0782261	0.0196011	-0.0976454	0.0879931	-0.0401048	0.018704	-0.0219282	-0.010366	-0.0830814	0.0205997	-0.0541436	-0.00302381	-0.00813894	0.0211702	0.00301748	0.09749	-0.0290552	0.023819	0.0676671	-0.0262986	-0.0147526	0.0074386	-0.0152293	0.00615815	-0.0780062	0.0354417	-0.0235145	-0.174647
GAPDH_P04406	-0.0421321	-0.00121164	0.00121062	-0.0340492	-0.0331667	-0.0143948	-0.00665111	0.0234418	0.118741	-0.00894707	0.0259456	-0.0370104	0.00369569	0.0034559	0.00785785	0.0666637	-0.0786543	-0.0786665	-0.0894144	-0.0743891	0.0476027	0.0373059	0.0233167	0.0619906	-0.0463983	-0.0184064	-0.00334605	-7.16527e-05	0.0581507	0.046511	0.0203799	7.16492e-05	-0.0328487	0.000352433	0.00932257	-0.00968334	0.00541334	-0.000336336	0.0178744	-0.0176002	-0.00251112	0.000336258	0.0374466	-0.001037	0.0195353	-0.00378976	0.00639165	-0.0230878	0.0143339
ANO6_Q4KMQ2	0.0877316	0.0415113	-0.00370688	0.049002	-0.0752104	-0.0535375	6.68904e-05	0.0457052	-6.68935e-05	-0.11112	-0.0114516	-0.0316949	0.0297442	-0.0179202	0.0147033	0.0247124	0.0201556	0.0454649	0.00934721	0.00953283	0.0266283	-0.104443	0.0103232	-0.0138145	-0.00890212	-0.0596535	0.014435	-0.0700739	-0.033815	0.00884753	-0.014546	-0.0205629	-0.0494857	0.0171261	0.0235034	-0.0220014	-0.0633495	-0.050792	0.0289124	0.0220253	-0.0540475	0.0640687	-0.0379591	0.00772491	-0.00776649	-0.0313389	0.0562278	0.0287067	-0.163964
SCAF4_O95104	0.0780253	-0.0273072	0.0479789	0.0153768	-0.0480774	-0.119538	0.0534375	0.021698	-0.00919121	-0.0388608	0.0327988	-0.109228	0.00913303	-0.127528	-0.0176712	0.0173389	0.0629987	0.0491534	0.0800808	0.0513482	0.014462	-0.0111991	0.045991	-0.143476	0.0515728	-0.0730251	-0.0329746	-0.0691099	0.00282995	-0.00283551	-0.0995745	-0.0955399	0.0132155	-0.0142266	-0.0224226	0.0460625	0.0606469	0.0262523	0.0128318	-0.0421535	-0.0647688	-0.0226731	0.0149685	-0.0433311	0.0436248	-0.0129469	0.0677281	-0.0751579	-0.0446832
SCAF8_Q9UPN6	0.0355359	0.00572742	0.103522	-0.0256566	-0.0372882	-0.0598401	-0.00302493	0.0277943	0.00566993	-0.0686593	0.0119543	-0.114599	0.0030186	-0.18425	0.0751387	-0.022591	0.127328	-0.0255685	0.138752	-0.0599376	0.0265654	-0.0225851	0.00622053	-0.0276448	-0.00188839	0.00188592	-0.0597764	-0.175043	0.102539	0.0880456	0.0627807	-0.0645001	0.0356564	-0.0992247	0.0353073	0.000718902	-0.0158827	-0.0577086	0.0518389	-0.0341092	-0.0811534	-0.0597595	0.00768165	-0.00071926	0.0447352	0.0368967	0.00953577	-0.00814058	-0.0549782
COMMD3_Q9UBI1	0.0173172	0.117087	0.141871	0.0683999	-0.0102333	0.0907044	-0.057093	0.0101612	-0.0151494	-0.0945032	0.0192005	-0.107604	0.0209998	-0.131891	-0.0362967	-0.0467179	-0.0460978	0.0841864	-0.0117843	0.0086091	-0.00866078	-0.115723	0.0455779	0.0179536	-0.0731719	-0.184162	-0.0701277	-0.110185	0.0613391	0.04071	0.104708	0.0545184	0.00486828	-0.0803483	0.00912246	-0.0357812	-0.0742603	-0.0357223	0.0151935	-0.00488477	0.0256984	-0.158388	0.106101	-0.0132406	0.0156351	-0.011143	0.0338234	0.013127	-0.321243
COMMD3-BMI1_R4GMX3	-0.340629	0.201227	0.0519767	-0.227781	0.0244212	-0.200797	-0.252015	-0.639001	-0.147977	0.106227	0.0702356	-0.30002	-0.00684764	0.225931	0.334533	0.00681529																	-0.00750657	0.294151	0.0959704	0.0943623	-0.00214637	0.0360936	0.0701455	-0.0385603	0.00214318	-0.0969979	0.204833	-0.0272395	-0.287404	0.0345797	-0.105383	-0.0249568	-0.28658
PCGF2_P35227	0.0539428	-0.0347253	-0.0419687	0.0701079	-0.0605698	0.0308392	-0.0611396	-0.0255975	0.105691	-0.132996	0.0544179	-0.0881421	-0.141072	0.0288998	0.0313649	0.0251512	0.063167	0.0169608	-0.0308404	0.00356956	-0.00118182	0.0622975	0.0561649	0.00118086	-0.0282477	-0.150595	-0.110747	-0.0757324	0.00289569	-0.0195484	0.0582208	-0.0460408	-0.0374929	0.00108297	-0.00108378	0.0158383	-0.0632959	-0.0464966	0.0429609	0.00547792	0.0520631	0.0327446	-0.0792311	0.0164492	-0.0468108	0.0524299	-0.081222	-0.0152312	-0.280161
DDX42_Q86XP3	0.155071	-0.0621418	0.131636	-0.0720146	0.0590739	-0.0600054	0.099089	-0.0665992	0.016979	-0.0360376	0.0544286	-0.0641794	0.0786179	-0.0478289	0.096455	-0.0171812	0.114796	-0.01773	0.113337	-0.102617	0.0687086	-0.0838526	0.102546	-0.114937	0.0725842	-0.0783143	0.00992985	-0.0912193	0.0708035	-0.00999867	0.0718841	-0.0108312	0.0907475	-0.108726	0.0760233	-0.0455722	0.0262973	-0.098625	0.047283	-0.0952181	0.0325693	-0.0798631	0.0947688	-0.0576353	0.0947188	-0.0510751	0.0979831	-0.0267856	-0.0303107
IK_Q13123	0.0792539	-0.00624275	0.0182311	-0.0658549	0.0602883	-0.0441206	-0.0958583	-0.044047	0.0889723	-0.141922	0.0384654	0.0127374	0.0470393	-0.00925427	0.00621585	-0.0113266	-0.00374564	-0.033375	0.00373594	0.0192137	-0.0564891	-0.0140439	-0.0673196	0.00657371	-0.0528946	0.044461	0.023246	0.00852202	-0.0684788	0.00858844	0.0259937	-0.0574119	0.0372915	0.0112727	-0.000863162	0.00520603	-0.0498002	-0.0505207	0.000862645	-0.027661	0.0102183	0.024232	-0.0124882	0.0532638	-0.0335566	0.0210065	-0.0228025	-0.0214338	-0.143152
FAT3_Q8TDW7-1	0.128382	-0.00466394	0.00464891	0.0439969	-0.0726134	-0.0283755	0.045465	0.173456	-0.184961	0.134986	-0.0536747	0.10102	-0.159308	-0.0106977	0.125464	-0.0819477	-0.0210946	-0.135799	-0.0975973	-0.246328	0.109467	0.134204	0.122432	0.130991	-0.188266	-0.135893	-0.117648	-0.115988	0.0282301	0.145347	0.0229321	0.0207906	-0.184972	0.0308706	0.00552569	0.00219571	-0.0819256	-0.0437857	0.0653363	0.178029	0.0309953	-0.00219906	-0.00841576	0.0323249	-0.113712	0.0308366	-0.181042	-0.0698791	-0.197232
TMEM208_Q9BTX3	0.0900962	0.0855623	-0.00208394	0.00208094	-0.062146	0.0757531	-0.0423255	0.0333682	0.00696438	-0.0736971	0.126784	-0.0385376	-0.067082	-0.101072	-0.0529593	0.0907317	0.151358	0.266043	0.174784	0.303474	-0.180209	-0.557932	-0.165246	-0.531351	0.196518	0.295717	0.183628	0.0880835	-0.219277	-0.0938131	-0.173238	-0.173414	0.0910278	0.225689	0.023378	0.0768897	-0.205095	-0.0645651	0.0688394	0.105212	-0.0686602	0.0339429	0.0858033	-0.0237631	-0.200281	-0.0503267	-0.0787783	-0.308885	0.0668614
CCDC124_Q96CT7	-0.0357776	0.0394739	-0.0259903	-0.0370443	-0.0409152	0.0372375	-0.0680565	-0.00595527	0.159005	-0.0507495	0.00593079	-0.0797834	0.0196878	0.0778209	0.00946449	0.0802864	-0.0354872	-0.033308	-0.0635477	-0.0269008	0.0133895	0.208886	0.0396866	0.101028	-0.0627744	0.0445208	-0.0705863	0.0364044	-0.0135149	0.0811448	-0.033592	0.091074	-0.00575091	0.0182223	-0.0203495	-0.0223495	-0.0506608	0.0438445	-0.0217788	-0.000931242	-0.0366456	0.053634	0.0120931	0.0178225	-0.0447631	0.0313064	0.000930642	0.0969887	-0.18099
HUWE1_Q7Z6Z7	-0.00136156	0.0140868	-0.000371416	0.00381704	-0.051691	0.00190172	-0.0128357	0.0193719	-0.0414376	-0.014997	-0.00497475	0.00820209	0.0230087	-0.00436151	0.00037132	0.0232198	-0.000811009	0.0119781	-0.00272786	0.0125819	0.0207789	-0.071637	-0.0264947	6.57375e-05	-0.00944537	0.031886	0.00959934	-6.57405e-05	0.000766752	-0.00816896	-0.0232844	0.0116601	-0.0172526	0.00467028	0.00228637	0.0266477	0.00654519	0.0121965	-0.0256433	0.0190396	-0.0338282	0.0118946	-0.00229	0.0262016	-0.0243736	-0.0233043	-0.017507	-0.0106451	-0.0696494
HUWE1_Q7Z6Z7-2																																																	-0.170069
HUWE1_H0Y659																																	0.00715195	-0.0409896	0.158769	0.182493	-0.175399	0.21631	-0.190654	-0.33747	-0.199224	0.022309	-0.134428	0.020591	0.194432	-0.00718758	0.217668	-0.605768
HUWE1_A0A087X1S3	-0.117313	0.0775475	-0.182061	0.00485882	0.0821284	0.0799153	-0.127531	-0.0478567	-0.048237	-0.00487524	-0.0656395	0.031683	0.222312	0.0801889	0.102022	-0.0269823	-0.025344	0.321778	-0.130312	0.344611	0.0232435	0.0620947	0.0341735	-0.0949534	0.249077	0.232575	-0.0236241	0.142672	-0.21546	-0.15764	-0.0988448	-0.20117	0.0609809	0.107721	-0.108066	-0.429951	0.101274	0.348766	-0.104413	0.251976	0.190061	0.0566125	-0.232162	-0.0950361	0.264535	-0.154732	-0.237696	-0.0589251	0.456452
SAMD4B_Q5PRF9	0.0860554	-0.00528561	0.00953324	0.0126098	-0.035528	0.00526631	0.0293303	0.0475171	-0.020075	0.0430172	-0.0197696	-0.0238532	-0.0202277	-0.00743603	-0.033231	0.0482501	0.0387174	0.0408926	0.0746397	0.126202	-0.0572132	-0.123629	-0.12999	-0.069471	0.0588105	0.0788075	-0.00677473	0.0102075	-0.0638703	-0.00491356	-0.0298326	0.00489689	-0.00958149	0.00414967	-0.00416164	0.0520846	-0.0173861	0.106629	0.0166661	-0.0631475	0.0454519	-0.018308	0.0965094	-0.0298787	0.0413936	-0.022084	0.0684294	-0.00781687	-0.14769
SAMD4A_Q9UPU9	0.0111649	-0.0413075	0.226058	-0.216043	0.0732318	0.0199935	0.141939	0.0305816	-0.147554	-0.282564	-0.248396	-0.0582491	-0.00260106	0.229724	-0.0307455	0.00259637	0.0465227	0.0216602	-0.0112202	0.214109	-0.0406052	2.2847	-0.0159155	-0.112562	0.179566	0.0496085	0.00261152	-0.0740586	-0.0224051	-0.0377371	-0.00261625	0.0807974	0.0853328	-0.0320645	0.197096	-0.208057	0.013895	-0.106173	0.136641	0.00245193	-0.159873	-0.296229	0.0832173	-0.0024561	0.00622602	-0.165092	0.0264469	-0.0417687	-0.127651
MRTO4_Q9UKD2	-0.0360864	-0.000429893	-0.00708644	0.000561441	-0.0149105	0.0348945	0.000429764	0.0637607	-0.0136245	-0.0858495	0.00506124	-0.0220684	0.0227804	-0.0158868	0.00726565	0.038346	0.0503218	0.0329149	0.0885854	0.000341974	-0.0407831	-0.128064	-0.0328983	-0.066286	-0.00827361	0.0288682	0.00989824	-0.0201455	-0.022066	0.0310841	-0.000342055	0.00401999	0.0124814	-0.0819148	0.0540962	-0.00363617	-0.00876526	-0.00113394	-0.00840029	0.00697936	0.0235797	0.0213113	-0.0573769	-0.0496737	0.0230453	0.0891493	-0.0308275	0.00113305	0.0101438
SRM_P19623	-0.0622251	0.0118401	-0.016154	-0.000502303	-0.0191435	-0.00686448	0.0344692	0.0235702	-0.025631	0.0080914	0.0252564	0.00372593	-0.00624606	-0.0072994	0.0349437	0.000502128	-0.0192666	-0.0676516	-0.0134849	-0.0516285	0.023931	0.00620877	0.0158939	-0.0794022	0.00150702	-0.00150859	-0.0158908	-0.0564772	0.0598417	0.0183822	0.00184914	0.0149253	-0.00673659	-0.0044156	0.0128475	0.0105219	0.698586	0.733745	0.0433878	-0.00245762	0.0158584	-0.0313151	-0.00805092	-0.0510493	0.0433137	-0.0245642	0.00245344	-0.0142479	-0.00732964
IQGAP2_Q13576	0.0444673	-0.00537021	0.0337805	0.0237116	0.0053503	-0.0351683	-0.0101194	-0.0700585	0.027154	-0.102626	0.0553812	-0.0315708	0.0184848	-0.044587	0.0206082	-0.0158567	-0.0321039	-0.000347645	0.021671	0.000347562	-0.0225462	0.0224735	0.0565294	-0.0511657	-0.0177001	-0.146613	-0.0862909	-0.126722	0.0270987	0.0193947	0.0436423	0.0187677	0.0303031	-0.00128049	0.0357951	0.0217345	0.0128933	-0.0288334	0.0220678	0.00127935	-0.0353629	-0.0631937	-0.00829955	-0.0418248	0.0323192	-0.0250269	0.0284468	-0.0524303	-0.111173
IQGAP1_P46940	0.0658754	-0.00566883	0.03141	-0.0264472	0.0385201	-0.0274692	0.0479372	-0.0309895	0.044849	-0.0420582	0.0284015	-0.0519425	0.00564664	-0.0141529	0.0131497	-0.0933761	0.0952925	-0.0202788	0.0523426	-0.00249838	0.029658	-0.05748	0.0358121	-0.0258179	0.0230079	-0.0566331	-0.0536814	-0.110708	0.068378	0.00249406	0.050961	-0.0264073	0.0622633	-0.0099685	0.0512626	-0.0311038	0.0288977	-0.0332378	0.0430674	-0.0139096	-0.000262905	-0.0229859	0.011571	-0.0373472	0.0196576	-0.049949	0.0538018	0.000262857	0.054386
IQGAP3_Q86VI3	-0.0401639	-0.00236267	-0.227686	-0.171368	0.00235881	0.0477231	0.0715603	0.00358097	0.11579	0.147938	-0.0127577	-0.111305	0.174476	-0.196675	0.0810734	-0.0256304	0.168271	-0.0649175	0.099081	0.018577	0.0275575	-0.081802	-0.039247	-0.00666133	0.160663	-0.0794772	-0.123374	-0.0279862	0.0288691	0.169311	0.00663072	-0.0350189	-0.0832353	0.0175517	0.000867607	0.0767155	0.00910568	-0.0652065	0.00417675	0.0709851	0.0519962	-0.00695507	-0.0709114	-0.000868129	0.0113366	-0.0721572	-0.174727	-0.131625
SMARCD2_Q92925	0.0232549	-0.00580833	0.0018903	-0.0156393	-0.0391079	-0.0624787	0.0283438	-0.00189278	0.0486286	-0.0490691	0.00638347	-0.00452583	0.0601632	-0.0266561	0.0442832	0.00798953	0.0759566	-0.00506758	0.0705422	0.0214355	-0.0505862	-0.16247	-0.0342814	-0.103602	0.067612	-0.0118189	0.0232062	-0.0280887	-0.0137679	0.0221454	0.00504984	0.0103313	0.000698653	-0.0497148	0.0347798	-0.000698991	0.0415363	0.0224277	0.0292331	-0.0185868	-0.0433299	-0.0768542	0.00681896	-0.0366117	0.0412275	0.0040158	-0.00611583	-0.05915	-0.0446189
SMARCD1_Q96GM5	-0.0546531	-0.00464308	0.012086	0.00462819	-0.0806315	0.0303395	0.0542858	-0.0119457	-0.00464772	-0.110777	0.115762	-0.0255451	0.0637555	-0.0284365	0.0093449	0.0935071	0.0200012	0.0349651	-0.00722221	-0.0241075	-0.000907305	-0.068422	0.0220076	-0.0603851	0.0150037	-0.0142392	0.0221487	-0.0937883	0.000906735	0.0104683	0.0255287	-0.0359094	-0.0491028	0.0293956	-0.0342863	-0.0201125	0.0812878	0.067399	0.0768184	0.0541946	-0.0534703	-0.0053805	-0.0618594	0.0607587	-0.0163961	0.00536051	0.0204968	-0.0373636	-0.0819639
SMARCD3_Q6STE5																																	-0.0546842	-0.0119559	0.0853087	-0.0483527	-0.0405664	0.0118576	0.0222788	-0.0995805	-0.0170015	0.0516033	0.0604083	0.183492	0.114576	0.177486	-0.0126141	-0.235361
GLRX2_Q9NS18	-0.000519952	-0.0387418	0.000777848	0.00648765	-0.0456686	-0.0363189	0.000519764	0.0117291	-0.133236	0.095503	0.01974	0.0500171	-0.117614	-0.0203879	-0.0289946	0.0367176	-0.155565	-0.0875931	-0.263753	-0.0964537	0.159409	0.103792	0.0977873	0.162687	-0.101169	0.011266	-0.0764122	-0.0427673	0.0450282	0.00747532	-0.00751425	0.062896	-0.133805	-0.100792	-0.00557242	0.0813245	0.0504112	-0.00430476	-0.0640334	0.00452178	0.0341893	0.0274623	0.0374074	0.00429195	-0.0299287	0.0403853	-0.0742832	-0.0543513	-0.100497
CBX4_O00257	0.395534	-0.0167031	-0.0376122	0.115227	-0.365544	-0.128854	-0.0370824	0.0327532	-0.573714	0.0364827	0.0165119	-0.147442	0.0275135	-0.215164	0.0400607	0.0287463	0.206298	-0.0151242	-0.0691788	0.186774	-0.0729558	0.182559	0.221759	0.0246748	-0.07994	-0.0102287	0.0101567	0.0704448	-0.0239149	0.212753	-0.106803	-0.043576	0.0451935	0.126852	0.000517349	0.0437949	0.0787485	-0.00328086	0.0205632	-0.000517535	-0.0426839	-0.0365896	0.18903	0.134176	-0.091628	-0.0330154	-0.0462295	-0.0938525	0.121738
UBXN6_Q9BZV1	0.074371	-0.0558369	-0.0386176	0.0252784	-0.0365065	-0.0591989	0.156006	-0.101783	-0.000745004	0.0658331	0.0105272	0.00074462	-0.0205858	-0.0390866	0.0744214	0.0167608	0.150906	-0.0531046	0.0486419	-0.0947804	-0.0600977	0.0760192	0.0528428	-0.0804511	-0.002846	-0.0262763	0.0741126	-0.110037	0.0028404	0.0599013	-0.0145054	0.0419335	-0.0741488	-0.000492398	0.0126763	0.0791473	0.0118646	-0.0683756	-0.00586317	-0.0548917	0.0340241	0.00087944	0.109708	0.00049223	0.0662835	-0.0219958	-0.0707616	-0.0470205	-0.176467
H1-5_P16401	0.0586386	0.03691	-0.00585462	-0.00267424	0.00407354	0.0408336	-0.023849	0.0050481	-0.0372435	0.0410808	0.00243166	-0.031147	-0.045375	0.0714857	-0.00243577	-0.0227639	-0.0420374	0.0439241	-0.0505886	-0.00444437	0.0197909	-0.060217	0.00451367	0.0355261	-0.0136707	0.053795	-0.00812132	-0.0285868	-0.00417547	0.029538	0.00416342	0.0569866	-0.0233651	-0.0461742	-0.0353474	-0.0641357	-0.0837387	0.0229927	-0.0308423	-0.0835599	-0.146609	0.0621296	0.0749392	0.152277	0.11025	0.0980729	0.124677	0.210254	-0.190833
H1-2_P16403	0.00997401	0.0267909	-0.0402029	0.032672	-0.0536888	0.013344	-0.0306182	0.0260572	-0.103255	-0.00632064	-0.032622	-0.0701684	0.00888332	-0.0165495	0.00629307	0.0618534	-0.0317459	0.0340051	-0.00219042	-0.00814141	-0.0417275	0.0021871	0.0106049	-0.0153939	0.0547065	0.0143	-0.00272411	0.0126731	-0.13185	0.0161189	-0.0887269	0.0451978	-0.138989	0.0270433	-0.299466	0.0620379	0.00405814	0.0742193	-0.0209504	0.0151036	-0.0221818	-0.0323661	0.0409603	-0.0562897	-0.120972	-0.00406959	0.0519659	0.0675924	-0.0559444
H1-4_P10412	-0.0713606	0.0498363	-0.0738592	0.0127945	-0.0147394	-0.000238987	-0.047876	0.0276444	-0.0862122	0.0437658	-0.000526284	-0.023987	0.000238948	0.027987	0.00343336	0.0305156	-0.000713632	0.0717958	0.00350099	-0.00544793	-0.16772	-0.404488	-0.215252	-0.0844168	0.0360492	0.110005	0.0417147	0.0244297	-0.161189	0.000713279	-0.0645335	0.0229764	-0.0239333	0.00308489	-0.0460672	-0.0030915	-0.054652	0.0265868	0.0170789	0.00899978	-0.0597585	0.015984	0.0190576	-0.00962288	-0.108354	-0.0239216	0.107104	0.184429	-0.329924
H1-3_P16402	0.0500699	0.0511762	-0.0298583	-0.07647	-0.0209516	0.0274701	-0.0139226	0.00454055	0.0534154	0.0197473	0.018425	-0.0225066	-0.0528357	0.0908998	-0.00455489	-0.0531545	0.0106638	0.0272196	-0.0176234	-0.0243674	0.0364532	-0.142175	-0.0211146	0.0769817	-0.0201209	0.0856093	-0.0107432	0.0384251	-0.0123571	0.0565255	-0.0201373	0.107743	-0.141536	0.0124366	-0.100223	-0.0333272	-0.0789617	0.00193814	-0.00194075	-0.0307359	-0.0437532	0.056511	0.00523819	0.00735895	-0.0519541	0.0102567	0.148468	0.192128	-0.125868
NMD3_Q96D46	-0.00138194	-0.0607218	0.0206422	-0.0119737	-0.00974558	0.0469341	0.00635966	-0.0298555	-0.0314548	0.0277987	-0.00192215	0.0323832	0.00535603	0.00138061	0.0363709	-0.00855277	-0.00550561	0.0485292	0.0250636	0.0314855	0.0492626	-0.0694207	-0.00531118	-0.0601832	0.0251792	-0.0231194	0.0421538	-0.00501033	0.0220055	-0.0775494	-0.00619095	0.00499299	0.0209479	0.00922086	-0.028553	-0.00600222	0.0116476	0.00386078	0.00168353	-0.0131868	-0.0303228	-0.053205	0.0140222	0.0177603	0.0410414	-0.0150241	-0.0259422	-0.00168549	0.0457595
CNOT3_O75175	0.11715	-0.00613496	0.0574773	-0.0596767	-0.00143395	0.00970357	0.0292507	0.0142937	-0.0202813	0.00143252	-0.0221328	0.0144657	-0.0205044	-0.0697215	-0.028207	0.0733758	0.0700303	0.0129026	0.0948481	0.000200269	-0.0618611	-0.0262215	-0.0342843	-0.0583393	0.0796832	0.0806162	-0.00212827	-0.0565153	-0.000200296	0.0467073	-0.0113098	0.0148496	0.00298609	0.0732922	0.032315	-0.0071724	0.00245456	0.0535783	-0.00532831	0.0240454	-0.00855993	-0.00245874	0.0910653	0.0187528	-0.0172483	-0.0640972	-0.00749821	-0.0294566	-0.21876
TOR3A_Q9H497	0.109565	0.0351563	0.0689086	-0.131362	-0.0660011	-0.0872681	-0.0904451	0.0400794	0.0935684	-0.00229006	0.00228643	-0.0217313	0.0244306	-0.0430674	-0.0438033	0.0605846	0.103292	-0.000185421	0.107657	-0.0110806	-0.0567364	-0.190227	-0.0845424	-0.0717847	0.0297786	0.084326	0.0346527	-0.0114613	-0.0171278	0.00183794	0.000185397	0.0197195	-0.0232858	0.0587316	-0.0107801	0.0341343	0.0221631	0.00152852	-0.0115669	0.038626	0.0462211	-0.00153015	0.0852588	-0.0470346	0.048873	-0.0134302	-0.0347515	-0.00949972	-0.22667
BAG6_P46379-3	0.0154255	0.0229572	-0.0143022	-0.00299553	-0.0307579	-0.0100655	0.0175899	0.0319496	-0.00785326	0.00873874	0.0231228	-0.0232957	0.00298932	-0.0255434	-0.0110916	0.0690436	-0.0238743	0.00817514	-0.0239516	0.032504	0.0395392	-0.00726252	0.00722614	0.0634131	-0.0629669	-0.049589	-0.0786246	-0.0687827	0.043384	0.107334	-0.00771887	0.0578536	-0.0845309	-0.00459677	-0.0266088	0.0298224	0.00619162	0.0262016	0.00612278	0.0305897	-0.0663484	-0.0355118	-0.0336471	0.00458217	-0.0591443	-0.0180357	0.0118506	0.0173964	-0.138308
BAG6_F6WML8																																																	-0.411502
FARSB_Q9NSD9	0.0376765	-0.00762133	0.0433739	-0.00678867	-0.00319608	-0.023842	0.0633633	0.00767336	0.0250292	-0.0355833	0.0305501	-0.0705795	0.00318901	-0.0306649	0.0486284	-0.00718401	0.0809576	-0.0323194	0.0193969	-0.021093	0.0317154	-0.0307464	0.0204035	-0.00729914	0.0072624	-0.0425347	-0.0258162	-0.0809761	0.0703419	0.0333242	0.029885	-0.0241656	0.0435367	-0.0320875	0.0626289	0.000398	0.0421529	-0.000217558	0.0446703	0.000217525	-0.00933351	-0.0293499	-0.002038	-0.0225568	0.0434379	-0.00389323	0.0241726	-0.00919376	0.0946125
RIDA_P52758	-0.120327	0.0306324	0.0601192	0.0788137	0.00203473	-0.0598778	-0.0854793	-0.096803	0.292644	-0.117735	0.00624944	-0.0779289	-0.0020376	0.0520855	0.00365953	-0.0176443	0.017103	0.0307904	-0.00664724	-0.0516231	0.00661675	-0.0431422	-0.00680941	0.0626451	-0.0953291	-0.0480355	0.042821	-0.04352	-0.0359137	0.0609108	0.0154956	0.0276267	-0.107959	-0.0123748	1.03768e-05	0.035173	0.00562365	0.0281571	-0.0374452	0.0166324	0.0506869	-1.03769e-05	-0.055439	0.0141958	-0.0438207	-0.014281	-0.0053864	0.0396937	0.168521
DERA_Q9Y315	-0.0726894	0.0330803	-0.0704259	-0.0579821	-0.0537659	-0.00199818	-0.0189268	0.0419748	0.0245193	0.000381282	-0.000381383	0.0300799	0.0413394	0.00849368	-0.0411695	0.0185973	-0.163246	-0.127315	-0.18975	-0.0744124	0.761988	1.2083	0.701479	0.76157	-0.0983011	-0.131456	-0.0986005	-0.0448494	0.358001	0.0594024	0.198606	0.0434971	-0.0548026	-0.0251925	0.00102346	-0.0359995	-0.00102418	-0.0077282	-0.00347778	0.00282833	0.106763	0.00719039	0.132116	0.038158	0.012298	0.10984	-0.0234508	-0.0497463	-0.164184
KARS1_Q15046	0.02183	0.0291765	0.031617	-0.0266677	0.00334687	-0.00335466	0.0453012	-0.00724436	-0.00790104	-0.0415988	0.0248796	-0.0355532	0.0136315	-0.00410481	0.0255124	-0.00711399	-0.0149266	-0.0563272	-0.0137194	-0.0380864	0.0612588	0.0301046	0.0463178	0.0248659	-0.0509202	-0.0539734	-0.0803284	-0.0839626	0.0728745	0.0176919	0.0409937	0.0135902	0.00210413	-0.0201778	0.0420616	-0.0021072	0.0160835	-0.00853122	0.0238809	-0.0158222	-0.0409278	-0.0204785	-0.0348779	-0.035279	0.0806925	0.00861693	0.0432761	0.00569188	0.0151452
RNF40_O75150	-0.0136432	-0.000384262	0.0168036	0.0699838	-0.00940279	0.00038416	-0.039204	-0.000580472	0.053088	-0.0325588	0.0261793	-0.0591401	0.0384634	-0.0376162	0.0520378	0.0431875	-0.00802842	-0.0352709	0.030675	0.0291855	0.0411145	-0.0183775	0.0204301	-0.0417172	0.0187661	-0.0857207	-0.02041	-0.0754575	0.0322938	0.0503697	-0.0134545	0.00798399	-0.0241431	-0.0134126	0.0257917	0.0366693	-0.000121153	-0.00268043	0.0368155	0.0295201	-0.0303913	0.00579306	-0.0113854	0.000121143	0.00361029	-0.00930059	0.00414882	-0.0236481	-0.0739666
RNF20_Q5VTR2	0.0395634	-0.0286801	0.00470513	0.00418719	-0.0322884	0.0259478	-0.0413133	0.020845	0.00835996	-0.0096611	-0.0238854	-0.0292503	0.0390893	-0.0494292	-0.00419938	0.0278923	-0.00250174	0.0024974	0.0377413	0.00269793	-0.00584801	-0.0797745	-0.04325	-0.0618834	0.0464071	0.0386858	0.00937088	-0.0215948	-0.0202617	0.0422198	-0.0215666	0.0110423	-0.0405222	-0.000676716	-0.0201434	0.030967	0.00662105	0.0113528	-0.00722234	0.000676399	-0.0482206	0.0167425	-0.0236624	0.000888718	-0.00232248	0.00415265	-0.00820664	0.014856	-0.116219
CEP104_O60308
ABRAXAS2_Q15018	-0.0441123	0.00734373	-0.0712878	0.0368859	-0.000869296	0.0146205	-0.0466497	-0.0143324	0.0975004	-0.00890548	0.0181444	-0.0126458	0.000868772	0.0074521	-0.0174722	0.016356	-0.0229467	-0.0119528	-0.0654936	-0.00939874	0.149103	0.0879003	0.0660467	0.0921263	0.0093379	-0.0125769	-0.0154785	-0.0359792	0.0393382	-0.050097	0.0433759	0.0299218	-0.0344095	-0.0881706	0.0693922	0.088066	-0.0139591	0.0257233	0.0285843	-0.0232953	0.0516926	-0.00386019	-0.0583429	0.00303148	0.0349657	0.0871827	-0.0167229	-0.00303786	-0.170233
KTN1_Q86UP2	0.0356097	0.027711	0.0300741	0.000318037	-0.0293118	-0.0113011	-0.00278467	-0.000318108	0.0104973	-0.0261305	-0.00869478	-0.0311877	0.0221676	-0.0352019	0.00880535	0.0246078	0.0234619	0.00173568	0.0678998	-0.0201077	-0.000907253	0.000906683	0.00815116	-0.0301859	0.0152591	-0.0466536	-0.0178821	-0.0536649	0.00666296	-0.00639056	-0.00451192	0.00231339	-0.0354936	0.0277935	-0.00339561	-0.00572628	-0.01272	0.014342	0.00867362	0.00980267	0.00338764	-0.0174271	0.0232102	0.0094684	-0.0178728	-0.0210921	-0.0135434	0.00999038	-0.0839943
MARF1_Q9Y4F3	0.157695	-0.193039	0.156469	-0.0552884	-0.421107	-0.00192003	0.190275	-0.163796	0.00191748	-0.0269056	0.0677901	0.176184	-0.258446	0.155166	0.0854822	-0.03083	0.102357	0.0486132	0.199626	-0.00898323	0.00583203	-0.0594999	0.0302527	0.0391313	0.074024	-0.191438	0.0200899	-0.22104	-0.0397106	-0.0058557	-0.0181569	-0.0303098	0.0324076	-0.0791226	-0.0203093	-0.0394109	-0.00395585	0.000884774	0.0132104	0.040072	-0.0140538	-0.0488714	0.0164725	-0.05796	0.0372268	0.010172	0.0750451	-0.000885317	-0.0489584
EPS8L1_Q8TE68	0.122596	0.084391	0.234232	-0.0302945	-0.0159277	-0.222732	0.220491	-0.0735399	-0.0978208	0.0862781	-0.110923	0.0157538	0.0590692	-0.0653537	0.113033	-0.0463851	0.173558	0.0744328	0.171361	0.15297	-0.0543276	0.190529	0.041138	-0.0423456	-0.138415	-0.0816586	0.18143	-0.099565	-0.0711511	-0.0760959	-0.165675	0.183269	0.243049	0.0181383	-0.0183693	-0.0980871	0.0685832	0.0832904	-0.0771428	0.110374	-0.172497	0.247885	-0.125249	0.0433193	0.17709	-0.155321	-0.0339615	-0.157089	0.156547
DNAJC2_Q99543	0.000717949	-0.000759758	-0.0241524	-0.0118771	0.0306889	0.0214707	0.0143736	-0.0198429	0.0669461	-0.106144	0.0149363	-0.0290126	0.0638489	0.0339546	-0.00741435	-0.000718306	0.0520052	0.0247902	0.0247857	-5.63925e-05	-0.0012469	-0.0825923	0.00694701	5.63903e-05	-0.0353214	-0.0725999	-0.0267751	-0.0437098	0.122026	0.0500523	-0.0134363	0.0196884	-0.0215346	-0.0951575	0.0479788	0.0355129	0.00441593	-0.0194848	-0.00812363	0.0139622	0.00393627	0.00921296	-0.105885	-0.072445	0.0573194	0.0453001	-0.00394704	-0.00633548	0.0278526
ATP6V1D_Q9Y5K8	-0.0241515	0.0306713	-0.0234065	0.0783501	0.00210348	0.0186233	-0.0226195	0.0538638	-0.0236368	-0.00210656	-0.0375198	-0.0231339	0.0439073	0.0433173	-0.0420114	0.0580049	-0.14006	-0.0460158	-0.0924369	-0.002396	0.164578	0.0194926	0.122972	0.110549	-0.0237214	-0.016634	-0.00253495	0.00239203	0.0622892	-0.0193214	0.0257492	0.00901262	-0.0460922	-0.00622211	0.0161403	0.00447705	-0.00762058	0.0258582	0.0133049	-0.00449098	-0.00471132	0.0969238	-0.0190636	0.0259286	-0.0259417	0.0664349	-0.0446702	0.0429471	-0.151389
DDX20_Q9UHI6	0.040252	0.0593458	0.046615	-0.0236935	0.060145	-0.013139	-0.0190441	-0.108997	0.0842062	-0.115997	0.0685619	-0.0789634	0.0512635	-0.0670435	0.0130204	-0.0320209	0.0515299	3.7964e-05	0.0825057	0.0248245	-0.00558006	-0.0674991	0.0975833	-0.0386751	-0.0428501	-0.144386	-0.109404	-0.165115	0.128154	0.026086	0.0843994	-3.7965e-05	0.0482281	-0.00248018	0.0844655	0.0314371	0.0824025	-0.0655246	0.0692956	0.00247592	-0.02143	-0.0872222	-0.00995567	-0.0422375	0.0962462	-0.0429556	0.0273565	-0.019542	-0.0199945
GART_P22102	0.0670119	0.000153536	0.076185	-0.0192703	-0.0378662	-0.00936883	0.0586251	0.035398	-0.025722	0.0229463	0.0340252	-0.00235357	-0.0397304	-0.039467	-0.000153552	0.014422	-0.00820847	-0.0367513	-0.00882861	-0.0428774	0.102853	0.145687	0.0912478	0.03367	0.00168684	-0.028603	-0.0277484	-0.0758937	0.077598	0.00646436	0.0428686	-0.00168882	0.0270287	-0.00550459	0.0480982	-0.0286419	-0.0122302	-0.0149222	0.0438421	-0.0227353	0.00440449	-0.0490356	0.05717	-0.0146446	0.0701604	0.0447378	0.0231372	-0.00441797	0.0339384
GART_C9JZG2	0.691888	0.0645108	0.156754	0.0151254	0.0566457	-0.0182861	0.316402	-0.143565	-0.746039	0.797503	-0.0809015	0.265619	-0.0152857	-0.246995	-0.0253931	-0.098533	0.388277	0.230724	0.330476	0.0497241	-0.0302394	0.299633	-0.273524	-0.46918	0.166408	0.00375484	0.0434559	-0.00376464	-0.197581	-0.533695	-0.0555528	-0.0861492																	0.204516
HSPA14_Q0VDF9	-0.012381	0.0330318	0.0551631	-0.0530712	0.055241	-0.00969659	0.0508081	-0.0290726	0.0324028	-0.0845582	0.0295871	-0.0046538	0.0044358	-0.00444948	0.0399868	-0.0314456	0.041763	0.0247071	0.0347421	0.0401185	-0.0259975	0.106032	-0.027082	-0.0481367	-0.0157453	-0.0271669	-0.0448334	-0.0337597	0.020177	0.0142399	0.0159577	-0.0143818	0.0190754	-0.0192817	0.0631471	0.00574118	0.0315471	-0.0165797	0.0148665	-0.0114219	0.0370054	-0.0721737	0.0210771	-0.0427804	-0.0133898	0.0642699	-0.00576412	-0.0124744	-0.0341424
STT3B_Q8TCJ2	0.0216056	0.0521248	0.0115562	-0.0569844	0.099449	-0.0479994	-0.0577082	-0.116315	0.11782	-0.145973	-0.00193123	-0.0602729	0.00192865	0.0820856	0.023637	-0.141378	0.0812815	0.140689	0.0742374	0.18136	-0.139024	-0.103455	-0.139252	-0.0847649	0.146343	0.119041	0.140969	0.163286	-0.159582	-0.0782657	-0.134097	-0.149707	-0.0555704	0.0282932	-0.000699138	0.066807	-0.00200387	-0.0142022	0.0343576	0.122166	0.0360387	0.000698799	-0.00801487	0.0166409	-0.0520444	-0.0849286	0.0485964	-0.0180589	-0.103266
STT3A_P46977	0.051664	0.0297486	0.0386382	0.00438235	0.00147223	-0.00355036	0.00377599	0.00464411	-0.0473335	-0.0145112	-0.00527391	-0.00147374	0.00976185	-0.0114224	-0.0124652	-0.0356232	0.0992364	0.0302709	0.060335	0.021992	0.00341641	-0.106969	-0.0725043	-0.058354	0.0384061	-0.00342452	0.00918407	-0.0258526	-0.016333	-0.0362383	-0.0158951	0.00471414	0.00350833	0.015478	0.0164963	-0.0401384	0.0404187	-0.00969502	0.0207052	-0.0288056	-0.0991863	0.0103417	-0.144127	-0.0880918	0.0318038	-0.0692382	0.0440045	-0.00351688	0.0650941
RRP1_P56182	-0.103683	0.0692192	-0.0133955	0.134085	0.102546	-0.177911	-0.0363732	0.0302912	-0.337143	-0.0187035	0.0132723	0.0698095	0.126135	-0.215423	0.0386708	-0.17302	0.00337421	-0.152306	-0.00338212	-0.0860671	0.0585541	0.134588	0.149598	0.0696378	-0.0610846	-0.12139	-0.179128	-0.130427	-0.00616039	0.0994189	0.0656413	0.0672306	0.105549	0.0224146	0.00270415	-0.0837835	0.0722223	0.0239045	0.051442	-0.0923927	-0.171279	-0.00270923	-0.274119	-0.0862131	0.082379	-0.0161639	-0.0487321	0.0502593	-0.293756
GOLPH3_Q9H4A6	0.0630281	0.028955	0.0829548	-0.0102004	-0.0416176	0.0161606	-0.00525724	0.0417549	-0.0931722	-0.0527386	0.0397111	-0.0165869	-0.0444654	-0.0885796	0.00523815	0.043238	0.0418817	-0.0148065	0.0574844	0.0323829	0.0239454	-0.0817629	-0.052095	-0.0458595	-0.119448	-0.0857407	0.0742912	-0.00638851	-7.21387e-05	0.0151638	7.21351e-05	0.00106334	0.0253367	0.0181565	0.00995823	-0.0360021	0.00256145	0.00661112	0.0276481	0.015046	-0.0690612	-0.0729125	-0.142885	-0.056849	-0.0854709	-0.0929084	0.00530661	-0.002566	0.0782814
GOLPH3L_Q9H4A5	0.000989716	0.00464807	0.0465383	0.0198254	-0.0151069	-0.0813983	0.0297745	-0.0191027	-0.106949	-0.185532	-0.000654045	-0.0592545	0.121863	-0.213008	0.000653749	0.115512	0.0783808	0.0303901	0.105867	-0.0480968	-0.00328243	-0.0650693	0.0266225	-0.0820147	-0.0538907	-0.105301	0.00774077	-0.107147	0.0392275	0.00327498	0.0762989	-0.0400967	-0.000338501	0.0188122	0.029655	-0.00995555	0.0503788	-0.104687	0.137843	-0.0459155	0.0631271	-0.0633361	0.0176823	-0.00139135	0.000338421	-0.0180043	0.0499296	-0.0697473	0.0118845
DDX1_Q92499	0.0449791	0.000195525	0.0180645	-0.0481842	0.00208462	-0.0131562	0.0475003	-0.000195551	-0.0191094	-0.0170286	0.0321391	-0.0112542	0.031066	-0.0120707	0.0363965	-0.0189171	0.0394811	-0.0592941	0.0217858	-0.0586312	0.0184472	-0.114601	0.0160486	-0.0427786	0.0172702	-0.03877	0.0238222	-0.0315428	0.0612953	-0.0162292	0.0503557	-0.0487645	0.0320011	-0.0552863	0.0550576	-0.0199303	0.00902086	-0.0303335	0.0138168	-0.0345841	0.0129387	-0.0508641	0.034127	-0.02163	0.0354688	0.044674	-0.00907762	-0.0401815	0.251967
GNPDA1_P46926	-0.115258	0.0117114	-0.0678792	-0.0022239	-0.0202776	0.00789957	-0.0329285	0.0209925	-0.0277138	0.00222048	-0.00389726	0.0070598	0.0277232	0.0298823	-0.00526698	0.053992	0.00809797	-0.0155594	-0.0253916	0.0150373	-0.0598069	-0.0628487	-0.106291	-0.00573117	0.0242677	0.102062	0.00747401	0.0163104	-0.0587663	0.00611276	-0.0453451	0.0057085	-0.0758669	-0.0216489	-0.0368296	0.00349108	-0.00349955	-0.0153088	-0.0188398	0.0125759	-0.0132706	0.0592987	0.0453976	0.0721438	-0.0256792	0.0384526	0.00733519	0.0147577	0.134745
GNPDA2_Q8TDQ7	-0.0996227	-0.0197285	-0.125835	0.183897	-0.117025	0.0155648	0.113422	-0.0348093	0.18179	0.0303842	-0.00513766	-0.0447973	0.00511943	0.083071	-0.069669	0.0354512	-0.096764	-0.0923394	-0.021962	0.0064603	-0.0967591	-0.0248206	-0.0630395	0.0817231	0.0203206	-0.00648936	-0.127216	0.0817733	0.016631	0.131611	0.041517	0.110299	0.00837909	0.00273154	-0.0248054	0.0522571	0.0196106	0.0420121	-0.0124228	0.0722038	-0.0287303	0.00875129	-0.0659845	0.00896721	-0.0378288	-0.00554826	-0.0587037	-0.00273673	0.211501
ARMC5_Q96C12																	0.105252	-0.279453	-0.011183	0.130044	-0.0538136	0.36644	0.0644506	-0.191968	-0.00328191	0.00327446	-0.237587	-0.108942	0.0942791	0.025691	-0.00817984	0.0374061
KIAA2013_Q8IYS2	0.00642726	0.0392302	-0.0027078	0.0339529	-0.0910899	-0.0125602	-0.0394841	0.00784503	-0.015643	-0.0217932	-0.043372	0.00270273	0.0891431	0.0652028	-0.0287941	0.0305724	-0.0616601	-0.0294102	0.00397563	-0.0143048	0.0130869	0.0607009	-0.00077149	0.107435	-0.00537666	0.0389571	-0.019899	-0.00405609	-0.0429592	0.000771077	0.0171066	0.0940161	-0.0651746	-0.000603991	0.000603738	-0.0202748	-0.0787214	-0.00470348	0.0247391	0.0274491	-0.0140145	-0.0307743	0.0948996	0.0473894	0.0117373	0.0969803	-0.0765696	0.0857613	-0.189065
SOX12_O15370	-0.314458	0.348268	-0.104586	0.334784	0.0356	-0.0527644	-0.0286801	0.128507	0.122153	-0.231681	0.0281211	-0.14048	0.267041	-0.0642652	0.164383	-0.203804	0.199437	-0.0900243	-0.0130383	0.00754947	0.00714022	0.241768	-0.056994	-0.00259592	0.102702	0.00259125	0.332401	0.231589	-0.194201	-0.17675	-0.200572	-0.213588	0.184231	0.0442839	-0.272912	-0.21939	-0.152611	0.00599622	0.0593211	0.255518	-0.32088	0.174017	-0.243165	-0.137628	-0.278195	0.063179	0.100605	-0.00602124
LRRC47_Q8N1G4	0.00101426	0.00255853	0.0232267	-0.0403818	-0.014945	-0.00101497	0.0505332	-0.0088396	0.0159855	-0.00187791	0.025397	-0.0157346	0.0260168	-0.00911635	0.00720676	-0.0351859	0.0475453	0.00359289	0.0330488	0.00312943	-0.0278029	-0.0818103	-0.0434833	-0.0506946	0.0358223	0.0616031	0.0349856	-0.00679354	0.0227798	-0.00395409	-0.00996204	-0.00313623	-0.00247278	0.0353995	0.0295241	-0.0234235	0.0101014	-0.0102658	0.0111407	-0.00171361	-0.0124508	0.00812634	0.000205681	-0.00493358	0.0399747	-0.00897216	-0.000205711	0.0250609	0.0319054
LAP3_P28838	-0.00963995	-0.0537622	-0.00561285	0.000874858	-0.0167356	0.0224467	-0.0102632	0.0531807	-0.0882802	0.116387	0.0088089	0.0169516	-0.000875389	-0.0842121	0.0075803	0.0792878	0.115805	0.345521	0.319519	0.343222	-0.340326	-0.64904	-0.533878	-0.527893	0.318346	0.401619	0.384793	0.384227	-0.365811	-0.203651	-0.37187	-0.125918	0.0575388	0.200563	-0.203094	-0.0428421	-0.0228286	0.0915181	0.0170787	0.147561	-0.0990767	0.00446722	0.219721	0.162114	-0.00448109	-0.108371	-0.0465005	-0.0366441	0.517883
CDC5L_Q99459	0.0113192	-0.0278124	0.00717429	-0.00240555	-0.0194889	0.0248328	0.00240155	-0.0182572	-0.00939978	-0.0708482	0.0225662	-0.0244683	0.0296453	-0.0332795	0.0168006	0.0440856	-0.0548362	-0.0457211	0.0098968	-0.0297646	0.0113261	0.0916737	0.0782647	0.0532802	-0.0657015	-0.126819	-0.0871013	-0.0641833	0.0328431	-0.00912996	0.00907255	0.0118075	-0.0337124	-0.086846	-0.00612586	0.0474955	0.0485528	-0.0271529	0.00232079	0.0212915	0.0207403	-0.00232453	0.00783874	-0.0423233	0.0616551	0.0409058	-0.0156195	-0.00823482	-0.104342
ADSL_P30566	-0.0467486	0.0185615	-0.061481	-0.0226524	-0.0315443	0.031084	-0.0331313	0.0212217	0.0263076	0.0354865	-0.0105058	0.00125105	-0.00125213	0.0790416	-0.00790524	0.0128533	-0.0609967	-0.0352097	-0.122913	-0.0775442	0.0484845	0.156732	0.0709787	0.0752767	-0.104295	-0.0353753	-0.101104	-0.0616617	0.0576326	0.0622535	0.0343708	0.0450238	-0.0571319	-0.000116619	-0.0239701	-0.0350121	0.00011661	0.0137857	-0.00209019	0.00575344	-0.00767191	0.017963	0.0133968	0.0121333	-0.0219594	0.0281034	-0.0390019	0.00191421	-0.135718
RAP1GAP_P47736-4	0.0296926	0.0319248	0.00796178	0.00738438	0.0237298	-0.0604117	0.0184815	-0.0429522	-0.0921593	-0.0460786	-0.00368794	-0.0338707	0.0802672	-0.0418871	-0.0509359	0.00367854	-0.0184262	-0.00572507	0.000747279	0.0124915	0.00247295	-0.079249	0.0490819	0.0380188	0.0401217	-0.000747666	-0.0290739	-0.0580753	-0.00125247	0.0162318	-0.0172928	0.0375431	0.0096102	-0.0279426	0.0116749	0.0440537	-0.0279121	-0.035114	0.0244909	0.0959669	-0.0010692	0.00106841	-0.0475348	-0.00742932	0.00920513	-0.0275739	-0.0401737	0.0232992	0.0537964
RPL7A_P62424	-0.0227196	0.0238481	-0.0695242	-0.0332998	-0.000868676	0.0140052	0.00355519	0.0309813	0.0378872	0.0641746	0.000868153	-0.0251347	-0.0683941	0.0945265	-0.0149282	-0.076079	-0.0366875	-0.0277787	-0.017885	-0.0597622	0.103504	0.301504	0.0646365	0.204374	-0.105582	0.0575968	-0.0856493	-0.00851651	0.0171177	0.00846653	-0.0387492	0.0448119	-0.0705968	0.0920692	-0.0425562	-0.0203862	-0.011191	0.0850989	-0.0204239	0.0468408	-0.0253757	0.0618608	0.0457345	0.0474364	-0.023484	0.0496972	-0.0435969	0.0111049	0.640711
FLNA_P21333	-0.000504615	0.00996941	0.00491335	-0.0282618	-0.012275	-0.00374898	0.0224951	-0.0105644	0.0197941	0.00906104	0.0186138	-0.0233746	0.000504438	-0.00890455	0.00517337	-0.00568567	0.0051308	0.0450499	0.0227394	0.0392484	-0.0532403	-0.0978879	-0.0927028	-0.0706404	0.058731	0.0528463	0.0411257	0.00916544	-0.0549399	-0.0514995	-0.0270367	-0.00514911	-0.0251052	0.0588518	-0.0682768	-0.0288647	-0.0293171	0.0172501	0.00606119	-0.0197136	-0.0606011	0.00225763	0.0113653	0.00351355	-0.00226117	-0.0462434	0.038854	0.0169078	0.333656
FLNB_O75369-8	-0.0243081	0.00201269	-0.00265633	0.00406633	-0.0364611	0.00378761	0.00157438	0.0341171	-0.0403988	0.0600051	-0.000376537	-0.00440678	0.000376438	-0.00365169	-0.00391801	0.0352265	0.0112151	0.0412894	-0.00553202	0.0435255	-0.0268719	-0.0743235	-0.0700837	-0.0396068	0.0339422	0.0692952	0.0315127	0.0186832	-0.0377586	-0.0117803	-0.032044	0.00551089	-0.0636254	0.0889069	-0.0598864	-0.0168062	-0.0192993	0.0025062	-0.000374226	0.0347237	0.00700457	0.0476198	0.000374129	-0.00303125	-0.0143196	-0.01918	0.0200745	0.0322345	0.186243
FLNA_H0Y5C6																																	-0.179649	-0.280544	0.196452	-0.0578284	-0.0103392	-0.149368	0.0422759	0.0266719	0.353834	0.0697407	0.285728	0.0102656	-0.0649969	0.143153	-0.0223395	-0.221639
FLNC_Q14315	-0.00599591	0.0109705	-0.0154224	-0.0130774	-0.0279803	0.00565647	-0.0193641	0.0105952	0.0324548	0.0204927	0.00216579	-0.00216905	-0.0281213	0.0114258	-0.00916681	0.0133484	0.00373741	0.0430546	0.0148942	0.0298191	-0.0418775	-0.100023	-0.121846	-0.0565476	0.0559036	0.083613	0.0550094	0.0474366	-0.0582487	-0.0475498	-0.0583447	-0.00374712	-0.0760432	-0.0129064	-0.0427144	-0.0255597	-0.025724	0.00372476	-0.00617999	0.00403981	0.00946976	0.00435478	0.0302019	0.00934835	-0.0333374	0.0248949	-0.0034732	0.00346486	-0.0148119
P4HB_P07237	-0.00187686	0.0424782	-0.0365478	-0.0287882	0.0382427	0.0315206	-0.0170553	0.000430639	0.0746426	0.0368145	-0.0290858	0.00647148	-0.000430768	0.0987376	-0.0164181	-0.0144053	0.000118091	-0.010801	-0.0652291	-0.0246483	0.0127052	0.0991008	0.00910858	0.0732325	-0.0344143	-0.00185136	-0.032362	0.00207792	0.00188136	-0.00576812	-0.000118101	0.0128659	-0.0657647	0.0429098	0.0182652	0.0133225	-0.000314957	0.0408471	-0.0312399	-0.011242	0.000314888	0.0649484	-0.0385395	-0.00757336	-0.0176998	0.0107966	-0.00626573	0.0395297	0.223397
P4HB_I3L0S0
DONSON_Q9NYP3	0.151689	-0.0648645	-0.0419637	-0.0176531	-0.0304069	-0.0085706	0.0750009	0.0614097	-0.0492034	-0.0171518	0.0187147	0.00851998	0.01344	-0.0992512	0.0540071	0.0646869	0.0931023	0.0241381	-0.369788	0.0563146	-0.173144	0.121552	-0.165704	-0.473346	0.0368857	-0.448644	0.00460176	0.387336	-0.357017	-0.128408	-0.00461648	0.0837571	0.019182	-0.100479	-0.0743615	0.00462233	0.00147141	0.0130027	-0.0116754	0.0377348	0.00903394	-0.0705832	0.0108831	-0.00147291	0.0327715	-0.00597438	-0.0215361	-0.0525468
ATP5PO_P48047	0.00174965	0.00908313	-0.00729745	-0.0413264	-0.0291509	0.0525899	-0.0443501	0.0376086	0.221553	0.0182041	-0.00175177	-0.0378677	-0.0579849	0.0803679	-0.0277649	0.00867886	-0.0564243	-0.0196335	-0.0846692	-0.0391329	0.00571689	0.0345024	-0.00573963	0.0736062	-0.061444	0.0444309	-0.0210891	-0.0446289	0.0315772	0.0875766	0.047594	0.0876657	-0.0741688	-0.048417	0.000331615	-0.0322768	-0.0784989	0.00730442	-0.000160635	-0.0265261	0.000160617	0.0392109	0.00192507	0.0253525	-0.0311853	0.049259	-0.0413121	0.00708135	-0.112307
SF3B1_O75533	0.0385695	0.0129805	0.0155805	-0.00911647	-0.0250449	-0.0434776	0.0326249	0.0232139	-0.0543741	0.00905922	0.0347262	-0.0374861	0.0112088	-0.0186458	-0.0102723	-0.0434776	-0.000333163	0.0225752	-0.0040042	0.0254841	0.000333086	-0.0665396	-0.025405	-0.064231	0.0619324	0.0201379	-0.00379153	-0.0449074	0.0162041	0.0145596	-0.0102131	0.00148965	0.0484731	-0.00043232	0.0225411	-0.0274689	0.0403965	-0.0309435	0.00043219	0.0187209	0.0116285	-0.0368155	-0.0201097	-0.0099136	0.0188187	-0.0349413	0.0326193	-0.0442559	-0.016401
RPS6KB2_Q9UBS0																	-0.0252826	0.0728816	-0.0279478	0.00640561	0.09327	-0.0903828	0.213114	0.258226	-0.212106	-0.0209179	-0.0110235	-0.369052	0.167551	0.283506	0.185751	-0.00643418	0.0465487	0.0754287	0.0855547	0.0784253	0.00327856	0.106764	-0.0140039	0.0291038	-0.108799	0.0176186	-0.0457446	-0.027759	-0.0136532	-0.00328603	-0.0764208	-0.0469952	-0.301287
AKT2_P31751	-0.0287443	0.0170698	-0.0112095	-0.0408155	0.00245919	0.00753994	-0.00246339	0.00877515	0.167998	-0.0666356	0.0158897	-0.0590053	0.0170538	0.00445997	-0.00826572	-0.0227816	0.00350608	-0.0508195	-0.0416164	-0.0312301	-0.00301383	0.0161288	0.0330936	-0.046723	0.00596623	0.00260583	-0.00261054	-0.0411617	0.042569	0.014025	0.00553767	-0.00434967	-0.0352934	-0.0380435	-0.000293812	0.00997025	0.0271729	-0.0378654	0.0019603	-0.0238607	0.00273167	0.00374721	-0.0684707	-0.0593306	0.0550664	-0.0144069	0.0138864	0.000293752	-0.0131959
AKT1_P31749	-0.0599239	0.00370873	-0.0289024	-0.0161744	-0.000380684	0.00489351	0.000380583	-0.0564587	-0.0440223	-0.0445632	0.00345406	0.0348946	0.04883	-0.0266263	0.0543277	0.00153796	0.072396	-6.61482e-05	0.0422623	0.0231103	-0.0208539	-0.115229	-0.01195	-0.0555406	0.0623286	0.0486157	-0.036958	-0.0591898	6.61452e-05	0.0255408	-0.014958	0.0106842	0.0169542	0.0527153	-0.0289592	0.0305883	0.0326114	-0.0484222	0.0594773	0.0504064	-0.00807388	-0.0195065	-0.0856792	-0.0144105	0.00802894	-0.025166	0.0118506	-0.0301129	-0.0357465
RPS6KB1_P23443	-0.0163881	-0.0600291	0.0559295	0.0805971	0.133579	0.0155936	-0.0380724	-0.0648647	0.215817	-0.204374	-0.00187362	6.5451e-05	0.0589935	-6.54539e-05	0.0697154	-0.0219691	0.136122	0.196934	0.179932	0.173188	-0.0887431	-0.221621	-0.0882684	-0.119303	0.287078	0.0835043	0.123818	-0.0219703	0.00438216	-0.0406704	-0.0381096	-0.00439551	-0.00218964	-0.0286611	0.0369613	-0.0302023	0.0146336	-0.0128507	0.0047049	-0.0487683	0.0217432	-0.0274265	0.00218632	-0.0283989	0.0360884	0.0105854	0.0357167	-0.0158562	-0.00771829
HERC2_O95714	0.0224921	0.0977627	-0.00748852	0.0843648	-0.0767367	0.0630949	-0.0604055	-0.0788863	-0.0857488	-0.21465	0.00667085	0.0124676	0.0445235	-0.0353931	-0.00670184	0.00794599	0.0865934	0.00633753	0.268096	0.037577	-0.00636549	0.0707292	0.037037	-0.1185	-0.0217179	-0.0195652	0.0311462	-0.0443808	-0.10376	0.0306241	-0.0745125	-0.0748481	-0.0870323	-0.0257545	0.122587	0.114138	0.028014	0.0187485	0.0829691	-0.00893421	-0.0310983	0.0955027	-0.124304	-0.0298177	0.0724553	-0.0355055	0.00887922	-0.135193	-0.0713658
ESRRA_P11474	0.0807467	-0.303905	-0.0276693	0.110123	0.127068	-0.225118	0.160563	-0.195803	0.0134316	0.09051	-0.247851	-0.0135578	0.0912912	0.315878	-0.425895	-0.390187	-0.228865	-0.165237	-0.273891	-0.0235874	0.419151	0.718373	0.405364	0.482966	-0.292123	-0.274861	-0.170935	-0.0599585	0.306022	0.222433	0.311169	0.023208	0.0950635	0.0648629	-0.0987702	-0.0927056	0.119824	0.0559816	-0.111265	0.000813169	0.279017	-0.156466	0.340072	-0.420484	0.159996	-0.068336	-0.15017	-0.000813627	-0.146283
ESRRB_O95718-1	0.025506	-0.122203	-0.0730906	0.0657943	0.113034	-0.0135086	0.0432054	0.17577	0.263649	-0.207272	0.00681995	-0.048531	-0.287068	-0.00685234	0.0404678	-0.135111	-0.24453	-0.72048	-0.318032	-0.29842	0.107201	0.376698	0.408953	0.467904	0.00824001	-0.261448	-0.428031	-0.445293	0.650172	-0.00828734	0.0562311	0.409133
ANKS6_Q68DC2-4																																	-0.0479342	0.0635637	-0.0375747	0.0264849	-0.0117097	0.141845	-0.0105396	-0.0767273	0.039806	0.0104632	0.0676438	0.0844693	-0.17527	0.0475883	-0.134479	-0.0237716	-0.272433
DERPC_P0CG12	-0.190863	0.0962955	0.0468778	0.161113	0.101571	-0.0678084	-0.160942	-0.313298	-0.161046	-0.105632	0.03168	-0.0323913	-0.0509506	0.035173	0.195874	0.0962386	-0.0654202	0.0763251	-0.0132351	-0.0294575	-0.00108807	0.305664	-0.0319994	0.114226	-0.147851	-0.0636316	0.00108725	0.186074	0.00345743	0.125472	-0.0162187	0.0782165	-0.248225	-0.145017	-0.177071	-0.136976	-0.0731301	0.0181373	0.0466381	0.163337	0.0472691	0.115527	0.040533	0.104303	-0.134065	0.0752943	-0.117091	-0.0183683	-0.334762
COL15A1_P39059	-0.131567	0.0420073	-0.0758102	0.0325405	-0.00649173	-0.0444988	-0.0796463	0.0817215	0.0877725	0.014899	0.127932	-0.125459	0.0509551	0.00646265	-0.0514385	-0.0126491	0.0772624	0.0613722	-0.0363618	0.125636	-0.0158346	-0.0468218	-0.0789993	-0.0649017	0.0703024	0.086304	0.0154501	0.166834	-0.0156174	0.0232045	-0.0465951	-0.0249186	-0.161273	-0.0464089	-0.0834681	0.0987159	-0.00282887	-0.0323128	-0.0701783	0.00282333	0.0302229	0.094902	0.0798665	-0.00649869	-0.027957	0.074399	0.04466	0.0592669	-0.107048
ERC1_X6RLX0	-0.0158475	0.0233409	0.00161389	0.000280857	-0.0352819	-0.0373136	-0.0651788	0.006775	0.00976776	-0.00897105	-0.000280912	0.0641908	0.0364359	-0.00980641	-0.0121172	0.0481302	-0.0270293	0.000309749	-0.0509825	0.00733287	-0.000309815	-0.00317529	0.0646208	0.0103268	-0.00532001	-0.0183471	-0.00253828	0.023176	0.0304828	0.036703	-0.00268187	0.0132251	-0.0573949	-0.00960625	-0.0127328	0.0205676	-0.000417341	0.0291796	0.00085627	0.0501702	0.023657	-0.0229306	0.0129445	0.0398469	-0.0516544	-0.033201	-0.060569	0.000417221	-0.0823
TARS2_Q9BW92	0.0647499	-0.155356	0.0555508	0.0107383	0.00112022	0.0039774	-0.0319406	-0.0859917	0.0108918	0.0563435	0.070892	-0.104549	-0.00112109	-0.12309	-0.0869647	-0.0334375	0.000560796	-0.0891839	0.0808772	-0.011825	0.0146611	0.0619853	0.0116167	-0.12657	0.00425475	-0.117131	-0.000561015	-0.0895646	-0.00231704	0.0528931	0.00699778	-0.016877	0.00379439	-0.0157308	0.0961623	0.0123927	0.0127749	-0.0487165	0.0330625	-0.0278625	-0.0290019	-0.0488216	-0.0652176	-0.0366622	0.0325323	-0.0038044	0.0388712	0.0220908	0.0122943
CDR2L_Q86X02	-0.0116499	-0.0517769	-0.0245931	0.0454054	-0.140969	0.00936056	0.0134859	0.0478492	0.0254713	0.0790517	-0.0379406	-0.125745	-0.00942169	-0.0706178	0.0153395	0.105369	-0.246447	-0.176481	-0.169386	-0.0385103	0.0647054	0.14926	-0.0762017	-0.0417638	0.090904	-0.00722948	0.00828545	-0.0878105	0.0330566	0.00719343	0.0304021	0.0397233	0.0824273	0.00240987	-0.00241391	-0.0603952	-0.0765709	0.0604439	-0.115732	-0.00778129	0.141841	-0.0477898	-0.0802633	0.115606	0.119788	0.0657427	-0.0512463	0.160708	0.266914
MYO9B_Q13459	0.0535548	-0.013164	0.0457343	0.0524799	0.00580849	-0.0335207	0.0495562	-0.00568594	-0.028009	-0.052966	-0.0420121	-0.0627998	0.105253	-0.0805553	0.0755232	0.00566362	0.00436834	0.0773121	0.148918	0.0951535	-0.00822153	-0.125738	0.0137426	-0.103194	0.136229	0.0254809	0.0290218	-0.0111594	-0.00438161	-0.0292548	-0.0470504	-0.0214306	0.0300453	-0.0493958	0.0323498	0.000725899	0.033442	-0.0245446	-0.0042994	-0.000726265	0.00312373	-0.0223999	0.0131994	-0.0362655	0.0388818	-0.0526654	0.00879119	-0.0120659	-0.129319
MYO9A_B2RTY4-4	0.0607232	-0.09627	0.170992	-0.0655009	0.00739455	0.0374133	-0.0982001	0.00478713	0.0383439	-0.243527	0.275165	0.0299404	-0.202867	-0.0441864	-0.00480307	-0.108906	0.120585	0.0487341	0.0239547	0.0477811	0.00851369	-0.0500165	0.00816642	-0.0359873	0.0410544	-0.0375652	-0.0418664	-0.0462952	-0.0310038	-0.00821291	0.0948656	-0.0272486	0.00684443	0.018056	0.0432145	0.060304	0.0625495	-0.0999269	-0.139336	0.00386466	-0.138822	-0.213857	0.0337574	-0.00387504	0.00617896	-0.0593248	-0.174754	-0.110072
SAP30_O75446	0.0378945	0.0872825	0.0784168	0.0238816	-0.040416	-0.0319385	-0.0562995	-0.00213645	-0.0591775	-0.0864049	-0.0579801	-0.0153085	0.0277994	0.0310483	0.00213329	0.113892	-0.0633656	0.0464074	-0.0606115	0.0856006	0.0502891	0.156608	0.107601	-0.0236112	0.0197327	-0.0646616	-0.0570305	-0.0158884	-0.125068	0.0736077	-0.0595833	0.0157154	0.00887276	-0.169746	0.109507	-0.0855073	-0.0240165	0.0327725	0.0417969	-0.00961643	-0.0261173	-0.0993235	0.0706311	0.108268	0.0274129	0.000208518	-0.000208548	-0.013221	-0.231737
TOMM34_Q15785	-0.000988716	-0.00759134	0.000988039	0.026893	-0.0158092	-0.0211922	0.0370991	-0.0388483	0.0347683	-0.0789239	0.0178221	-0.00543187	0.0158113	-0.0551501	0.00619948	0.0372407	0.0536617	-0.00664792	0.0708622	-0.0599054	0.0262544	-0.101848	0.0579888	-0.0434264	0.0397471	-0.0763632	-0.0177741	-0.0896026	0.0722911	-0.0145155	0.0362694	0.00661742	-0.0118386	0.0712223	-0.0549081	0.0135371	-0.00118723	0.0153891	0.00850812	-0.0187062	0.00118626	-0.0666534	0.0655754	0.00948692	0.0232433	-0.0290503	-0.0115898	-0.071316	-0.0605992
AFDN_P55196-1	0.0403115	0.00173916	0.0327899	-0.0227036	0.0139691	-0.031862	0.0395828	-0.00174126	-0.0188851	-0.0572359	0.0103304	-0.0346453	0.0275532	-0.0538154	0.0231936	-0.0345532	0.033156	-3.57266e-05	0.00307723	3.57257e-05	0.0722023	-0.0128714	0.0683187	-0.0133343	-0.0169096	-0.105302	-0.0209755	-0.0963545	0.0683759	0.0190699	0.053099	-0.0247457	0.00886621	-0.00044607	0.00711269	-0.0156485	0.0152183	-0.0333108	0.0264979	-0.00567085	0.000445932	-0.0512087	0.0387719	-0.0149496	0.0177864	-0.0190567	0.00801837	-0.0121716	-0.0661632
AFDN_J3KN01	-0.0417335	-0.100334	0.0142134	0.0133537	-0.0473667	-0.00292432	0.00291841	0.045333	-0.0794895	-0.025019	-0.0369368	0.0129122	0.0209887	-0.1237	0.0332877	0.0391769	0.0548837	0.00247716	0.0542124	0.146748	-0.00248142	0.0568558	0.0762411	-0.0342666	0.0385668	-0.100934	-0.00976314	-0.0360714	-0.00704646	0.0578652	-0.0804009	-0.0250484	-0.00751977	0.0556658	0.011762	0.00748078	0.013396	0.0424028	-0.0327994	0.0559745	-0.0396831	-0.0925951	-0.0425643	-0.0622537	0.0175503	0.0278489	-0.0231587	-0.0440748	-0.0895436
AFDN_A8MQ02
AFDN_H0Y948
PARP14_Q460N5	0.0964674	-0.0562678	0.0918487	-0.016429	-0.0816658	-0.0314905	-0.0111003	0.00591257	-0.21696	0.0540621	0.162893	-0.00132246	0.0869071	-0.0455924	0.00132124	0.0571913	-0.364017	0.00674328	-0.0535622	0.0538823	-0.205529	0.0449979	0.244596	0.0512487	0.117031	0.0320469	-0.0158976	-0.230298	-0.0444343	-0.0464919	-0.00677495	0.0255876	-0.159116	0.0325045	0.298766	0.212398	-0.0949862	-0.165872	0.141503	0.0965493	0.145268	-0.193204	-0.106836	-0.0740928	-0.0611699	0.00607554	0.0288491	-0.00610123	0.0442001
C11orf24_Q96F05																	-0.0468246	-0.0317857	-0.265227	-0.104409	0.11626	0.102793	0.145021	-0.0182203	0.0179931	0.220757	-0.200796	0.238962	-0.155518	0.146099	0.020694	-0.193546
MACROD1_Q9BQ69	-0.078806	-0.239438	0.0275195	-0.0318228	-0.124438	0.0986523	0.0972582	-0.05233	0.0531735	-0.258061	0.213255	0.3529	0.191753	-0.0949502	-0.0185117	0.0182772	0.157227	-0.0595686	0.0887116	0.014618	0.0255667	-0.112087	0.186607	-0.019365	0.0815718	-0.109558	-0.0147676	-0.0199381	0.204801	-0.054317	0.269522	-0.0297554	0.0966679	-0.0842373	0.0995575	0.0113598	0.1112	-0.0321722	0.0281865	-0.0116345	-0.01145	-0.120689	0.105785	-0.074995	0.114142	-0.0160228	0.106011	-0.0728831	-0.0957571
PSMB1_P20618	-0.134294	0.0240212	-0.105274	0.0427004	0.0126494	-0.00162911	0.00162728	0.0109475	-0.00629355	-0.0565734	-0.0478526	-0.0181016	0.0378381	0.0227141	-0.0230798	0.0147328	-0.0707844	-1.15312e-05	-0.0321044	0.0464703	-0.0290303	0.0401479	-0.000680496	-0.00557336	-0.00299428	0.0437903	0.00697558	0.0531631	1.15311e-05	0.0342347	-0.0180316	0.0361162	-0.0645571	0.0216047	-0.0499485	0.0166479	-0.0174887	0.00606988	0.0145011	0.0820646	0.00561739	-0.0159279	0.0611043	0.0278526	-0.0489032	-0.0246519	-0.0332143	-0.00563935	0.117628
PEX7_O00628	0.00462175	-0.0403241	0.0398375	0.0682474	-0.224697	-0.0231981	-0.0720399	-0.00984753	0.0450014	0.0496412	0.056988	-0.0046366	0.120777	-0.100288	0.0120733	-0.138184	0.346466	-0.0281312	0.0710885	-0.0480342	-0.124138	-0.221327	0.0774134	-0.0209143	0.0633277	0.117878	-0.0891277	0.00668368	0.0474798	0.0141042	-0.00671479	-0.171913	0.128085	-0.023973	-0.188911	0.094445	0.087771	-0.325003	-0.286122	0.1936	0.0235812	-0.263355	0.0755308	-0.175035	0.0819514	-0.273064	-0.309152	0.0445517	0.00532769
RPA1_P27694	0.0151419	-0.0206815	0.00834814	0.00280344	-0.0429137	-0.0214495	0.00476905	0.0182511	-0.0505032	-0.0214706	0.0120008	-0.0028089	0.0150802	-0.0454621	-0.0108825	0.041064	0.0221958	-0.0389382	-0.0746887	-0.0752819	0.127704	0.10016	0.122382	0.110247	-0.0930618	-0.105439	-0.0446371	-0.0675806	0.113214	-0.00606236	0.0742331	0.00603699	-0.00966697	0.00925872	-0.0136405	-0.00125594	0.0166391	-0.0152115	-0.0111453	-0.0214706	0.0178386	0.00925414	0.0261615	0.00361394	-0.0274135	-0.0127881	0.00125484	0.0134967	-0.0569704
HMGN5_P82970	-0.00206284	0.0708207	-0.0419678	-0.0469464	0.0281249	0.0354022	0.0698095	0.0296126	-0.10182	0.127115	-0.00654209	0.0020599	-0.00816026	0.0732768	-0.0199518	-0.0493802	-0.21957	-0.160447	-0.198834	-0.169016	0.206214	0.39308	0.199386	0.279108	-0.204253	-0.124254	-0.124232	-0.0379034	0.0785507	0.0868652	0.036933	0.043583	-0.0629397	-0.00728844	-0.0130292	0.00725181	-0.0268961	0.0624824	-0.0751216	0.0206665	0.0243467	0.0357696	-0.0457084	0.0814727	-0.0797584	0.0279046	-0.0870402	0.0165944	-0.109794
HMGN5_Q5JSK9	0.00620459	-0.0644413	-0.13928	0.0797691	0.00897763	0.0250802	-0.00623138	0.03645	-0.228098	0.148943	-0.207772	-0.0473045	0.0243271	-0.157444	-0.0223129	0.12493																																	0.0324006
GAK_O14976	0.0651403	-0.167054	0.0739826	0.137479	0.135942	-0.0120212	-0.120412	-0.125443	0.402603	0.385077	0.0165785	-0.00394389	-0.116736	-0.30025	-0.113317	0.00393314	-0.245339	-0.248837	-0.0561647	-0.248768	-0.0941545	-0.0709877	0.173984	0.101943	0.495763	0.389181	0.126927	0.0540599	-0.184049	-0.19116	0.281003	0.338216	-0.0240779	-0.110062	-0.0129604	-0.0346608	0.0143738	0.0080553	0.468148	0.501986	0.588233	0.532778	0.286593	0.192352	-0.063692	-0.119583	-0.00810053	-0.104746	-0.3385
TBCB_Q99426	0.0258775	-0.0379114	-0.00157462	-0.115517	0.0388888	-0.0218774	0.0127616	-0.0978424	0.0269363	0.0159714	-0.0644975	0.0300269	0.0015729	0.0198539	-0.0483075	-0.0549704	0.0460316	0.0279074	0.0357757	0.0255075	-0.089962	-0.111634	-0.0985515	-0.0974688	0.0265416	0.0663492	0.00569735	0.0379543	-0.0650675	-0.00571994	-0.0830407	-0.0305204	-0.0120969	0.0545376	0.0150915	0.0212895	0.0537919	0.00593947	-0.00824485	0.00217811	-0.00218141	0.0298057	-0.0875545	-0.0343439	-0.0465645	-0.0963759	-0.0330561	0.0286451	-0.0402493
CYB5R4_Q7L1T6	-0.0742383	0.0155423	0.0857567	0.577328	-0.000797601	0.0283105	-0.0204509	0.0182242	-0.0347582	-0.143828	-0.0188694	0.019529	-0.194321	0.0817045	-0.0376852	0.00079716	0.116784	0.00284004	0.0958203	0.0576982	-0.0180617	-0.0791009	0.00429253	-0.0521605	-0.0210558	0.0486519	0.00311451	0.0246753	-0.00284564	-0.0162257	-0.0333785	-0.0623883	-0.0361463	0.00355494	0.00884801	0.107036	0.0787268	-0.115653	0.02127	0.0272699	-0.00356372	-0.0461773	0.0334821	-0.0797358	-0.0933834	-0.0782735	-0.0301417	0.0476482	-0.132134
GLRX5_Q86SX6	-0.252407	0.134486	0.178845	0.295727	-0.100125	-0.00025527	-0.123607	0.0370238	0.0242302	-0.0720452	0.000255225	-0.0778535	-0.0357014	-0.0218959	0.0372121	0.000646023	0.00357019	0.0450421	0.00611412	-0.0224668	0.0409821	0.0216738	0.157695	0.21502	-0.0322934	-0.318211	-0.00357905	-0.138833	-0.0448086	-0.0122729	0.0891711	-0.0660279	-0.111519	0.0757736	-0.0581346	0.0929039	-0.124112	0.178194	-0.365823	0.111347	0.154234	-0.0351134	0.130655	0.0321375	-0.210032	-0.196219	0.0306524	-0.0313179	-0.228023
TOE1_Q96GM8	-0.0960426	0.0273321	-0.0993284	-0.00697124	-0.0873177	-0.0274174	-0.0281479	0.00890435	0.215654	-0.121901	0.134952	-0.0262452	0.0769911	0.0483464	0.00693772	0.0150292	0.0247212	-0.014061	0.0397287	0.0785612	-0.0685919	0.0236732	-0.0216205	-0.0253298	0.0334074	-0.0440706	0.0337956	-0.0651302	-0.0135068	0.0338359	0.0133815	-0.0337831	-0.0680838	-0.0347851	0.000391535	0.0299023	0.078224	0.0263819	-0.000391641	-0.0584994	-0.00950862	0.0405373	-0.018002	-0.0707178	0.00242443	0.0622417	-0.0603901	0.0142278	-0.0427251
ASPSCR1_Q9BZE9	0.0327789	-0.0193789	0.0311827	0.00392842	-0.00117266	-0.0487923	0.0011717	-0.0432353	0.0547725	-0.0491619	-0.0305289	-0.0495579	0.0180479	0.00734973	0.0249429	-0.0213194	0.0431354	-0.0294098	0.025995	0.0445643	0.0254809	0.0133724	0.0335077	-0.0180793	0.0414946	-0.0400405	-0.0152973	-0.0134975	0.0383599	-0.035431	-0.0176172	-0.0443247	-0.00654307	-0.00165145	0.0271288	0.00807314	0.0211714	0.00962191	0.0274296	-0.00915981	0.030306	-0.0333252	-0.0188241	-0.0182567	0.066409	0.00164956	-0.0119951	-0.0396092	0.132782
PRRC2C_Q9Y520-7	0.0136928	0.0317589	-0.00813496	0.0466276	-0.00675378	-0.0415417	-0.0225342	0.021063	-0.0542807	0.00672231	-0.0319184	-0.00718165	0.018802	-0.00739447	0.010262	0.0350828	-0.0295954	0.00963572	-0.0331543	0.0116874	-0.0403507	0.0231075	-0.0174397	0.00913264	0.0187839	0.0264853	-0.00394	-0.00688791	-0.107046	0.0227904	-0.0750565	0.00392927	-0.0474237	0.0228176	-0.041402	0.000673068	-0.00617348	0.0164442	-0.000673382	0.0235605	-0.0252487	0.009016	0.0337681	0.0209972	-0.0451896	0.0337951	-0.0483183	-0.0161077	-0.203359
PRRC2A_P48634	0.0798917	-0.00717346	0.00713796	-0.0325269	0.028201	-0.0626357	-0.00922461	0.0145183	0.0301612	0.0316201	-0.007352	0.0189836	-0.050638	-0.0440864	-0.0136524	0.0249189	-0.0883576	-0.0236356	-0.0970868	-0.018574	0.0126453	0.0877711	-0.0139773	0.0355208	0.00498637	0.0105306	-0.00500367	0.0180212	-0.068187	0.0285188	-0.0447538	0.0320658	-0.0319441	0.0292798	-0.0389005	0.033118	-0.0147288	0.0122096	0.00705761	0.0907282	-0.00173256	0.00957402	0.000969834	-0.0246573	-0.00261523	0.0357515	-0.00578062	-0.000970486	-0.201712
ABCF1_Q8NE71	0.0660942	-0.00160347	0.0517962	-0.0189812	0.00171701	0.00160169	0.0191722	-0.00978016	-0.0205848	-0.0452893	0.0273161	-0.0400732	0.0211556	-0.00984061	0.023234	-0.0430036	0.0456479	0.00717066	0.0455719	-0.00600251	0.00442685	-0.0710548	0.0214856	-0.0667482	0.0147356	-0.0485933	-0.0667773	-0.104088	0.00951245	-0.00444047	0.011264	-0.0164728	0.0299071	-0.00804567	0.0386766	-0.0127253	0.0418653	-0.0253911	0.000589877	0.00947919	-0.000590119	-0.0362783	0.00423461	-0.0266679	0.0281259	-0.0645937	0.0112354	-0.0576843	0.073841
UBP1_Q9NZI7	0.0706214	-0.0599146	0.00145256	0.0144442	0.0434768	-0.0524244	-0.0582107	-0.0562618	0.0852641	-0.14275	0.0794205	-0.0470854	0.0541809	0.110325	-0.00145402	-0.010079	-0.0806258	-0.129213	-0.041499	-0.206632	0.230537	0.22616	0.227902	0.184016	-0.162694	-0.317929	0.0473763	-0.068318	0.121686	-0.0105913	0.0870081	0.0105141	-0.0733491	-0.0194314	0.00196867	0.00106305	-0.0139869	-0.0363315	0.0152159	-0.0310846	0.0382902	-0.0214693	0.0106274	-0.00640406	0.0191412	-0.00106383	0.0663801	0.0283494	-0.00783324
TFCP2_Q12800	0.0378286	0.0110201	0.0162599	-0.00166995	0.0938635	0.0723108	-0.0278908	0.00166801	-0.122826	-0.0266167	-0.0309986	-0.0529282	0.0646046	0.02357	-0.0621829	-0.0469532	-0.0553795	0.0492335	0.0174649	-0.00902474	0.0332473	-0.117793	0.0450003	-0.0455419	-0.0516473	-0.114672	0.0999321	0.0960158	-0.111736	-0.0943356	0.0214136	0.00896864	0.0318241	-0.0111945	-0.0109178	0.0511674	0.0387642	-0.07161	0.0130093	0.0315059	-0.00990246	-0.0195132	0.00184427	0.0153986	-0.00184663	-0.0244248	0.0562813	-0.05702	-0.0671262
PRRC2B_Q5JSZ5	0.0704835	-0.0423518	-0.0348899	-0.128098	0.0149727	-0.0878786	-0.0650301	-0.0151298	0.254403	-0.103782	0.0742301	-0.175081	0.0740123	0.0331882	0.0232002	0.143752	-0.0313935	0.0272044	-0.0039133	-0.0303856	0.0604349	0.132169	-0.0089332	-0.000962556	0.000961914	-0.0362702	0.0696132	0.0111872	0.0240124	-0.0387754	-0.0170911	0.102951	-0.0435829	-0.0138151	-0.00593846	-0.0484604	-0.0292945	0.0117444	0.0328962	0.031628	-0.0652191	-0.0761759	0.101163	-0.0154668	0.102109	0.00591412	0.0325589	0.0356936	-0.14816
PRRC2B_H0Y412
SEPSECS_Q9HD40	-0.0163722	0.0378556	-0.0311772	-0.0936398	0.00527443	-0.00529378	-0.0568787	0.0762091	-0.0723469	0.0508987	-0.0245469	0.0495102	0.0478844	0.0701199	0.0319338	-0.0150079	0.00507308	0.0240746	-0.0317494	0.0682625	-0.0426651	1.39803	-0.0467787	-0.0560333	0.0812938	0.0780696	0.00234863	0.0409926	-0.104599	-0.0245658	-0.0257571	-0.00235246	-0.0585721	0.059473	-0.00826097	0.0563179	0.0391435	0.0192777	0.00783744	0.048182	-0.0246733	0.0450697	-0.0624985	-0.00443732	-0.0170383	-0.0189503	-0.0295796	0.00442371	-0.126733
SEC61B_P60468	-0.0993217	0.0363797	-0.000928453	-0.0423238	0.136732	0.000927856	0.0234844	-0.0881041	0.122361	-0.0924908	-0.00666075	-0.0198074	0.0445999	0.135465	0.0392333	-0.106941	-0.00627549	0.0526116	0.0188793	0.0537485	-0.082215	0.00624831	-0.10281	0.0291246	0.0193345	0.033893	-0.0291475	0.0310946	-0.0464739	-0.0251023	-0.0450721	-0.0729148	-0.171875	-0.0177354	-0.109428	0.0311173	0.0227307	-0.00881479	0.00876126	0.0453334	-0.0281641	0.195748	-0.177712	-0.0464332	-0.0216917	0.0480774	0.0467498	0.131414	-0.0439499
FIS1_Q9Y3D6	-0.0679542	-0.111821	0.0313541	-0.00155878	-0.0684534	0.0172693	-0.0347617	0.0314355	-0.0747886	0.0441172	-0.0341225	-0.0147297	0.00155709	0.119832	0.00510164	0.119989	-0.0183971	-0.0251836	0.017887	-0.0514912	0.0328178	0.0109666	-0.023188	-0.0110506	-0.057603	0.0436766	0.172543	0.154589	-0.0375833	0.0629167	-0.0519009	0.037127	-0.139437	-0.0148967	-0.00240015	-0.121679	-0.0905216	0.145235	0.0145316	0.00239617	0.0602898	0.0245357	0.254194	0.0684977	-0.106394	0.071675	-0.0799846	-0.0270713	0.116496
MRPL2_Q5T653	0.0805126	-0.0240557	0.083016	-0.0643484	0.00473667	-0.0953327	0.0555098	-0.00553116	0.0170587	-0.0757911	0.0709105	-0.0300455	0.108453	-0.00475227	0.0395767	-0.0412349	0.190007	-0.0529455	0.0903637	0.00498069	-0.0418459	-0.112174	0.0278656	-0.0865083	0.0726379	0.00940506	0.0204719	-0.101575	-0.00499795	-0.0682059	0.0239838	-0.127259	0.033847	0.0111332	-0.0025859	-0.0920262	0.0651208	-0.0255114	0.00756916	-0.101207	-0.0750816	0.0113807	0.0551708	0.00258127	0.0727379	-0.211625	-0.0326457	-0.150078
JAGN1_Q8N5M9	-0.205829	-0.112138	-0.130194	0.130396	-0.0117691	0.0116738	-0.127509	-0.0262367	-0.100447	0.0421171	0.0149802	-0.0559176	0.0450853	0.0826177	0.0214927	0.14357	-0.0840115	0.0453623	-0.100325	0.0846693	0.069418	-0.0401856	-0.0189062	-0.127918	0.0355719	0.0483283	0.0186616	-0.0397574	-0.121627	0.105124	-0.0615034	0.0257806	-0.343494	0.115275	0.176587	-0.0133658	-0.0589953	0.0758908	-0.0159116	0.169977	0.0747047	-0.146703	0.172491	0.341666	0.0102959	-0.0583156	-0.0451328	-0.0103699	-0.37893
HDAC6_Q9UBN7	0.0458713	0.00721436	0.00337427	-0.0365756	-0.0851525	-0.0849977	0.00510865	0.0668629	-0.0861652	-0.051323	0.0230775	-0.0518799	0.054756	0.00229009	-0.00229373	-0.0998913	-0.012332	-0.0408891	0.00111252	-0.0211145	0.0853435	0.0597403	0.0550147	-0.0263205	0.00647667	-0.0284262	0.047125	-0.0805578	0.0498194	0.0340388	-0.00111338	-0.0103221	0.056844	0.0250183	0.075158	0.00845144	0.106224	0.0228313	-0.00888573	-0.0140314	-0.063686	-0.0569936	-0.0320617	0.00570862	-0.0057313	-0.00804232	-0.0162199	0.0117428	-0.0354748
ITPKA_P23677	-0.0233509	-0.0817292	0.0316021	0.0507165	-0.0803414	-0.0299062	0.0123587	0.000406189	-0.112092	0.0255953	0.0611694	-0.049946	0.0041038	-0.0479482	-0.000406303	0.0867529	-0.0183711	-0.0442375	0.116045	-0.0132539	-0.000135805	0.000135792	0.0370355	-0.0603064	0.0656596	0.0422419	0.00923234	-0.0338654	0.0100303	-0.0367595	0.0200027	-0.0213604	0.0367057	-0.00184713	0.00588946	-0.00940763	0.0136942	-0.0900704	0.0496017	-0.0242014	-0.0712192	-0.0561461	-0.0326947	0.0623173	0.0227467	-0.0473071	0.00289261	0.00184476	-0.127489
ITPKC_Q96DU7	-0.0116566	0.00114159	-0.0231573	0.0365807	0.0740002	0.00894935	-0.0882179	0.0333289	-0.114398	-0.0011425	0.0280732	0.020671	-0.104107	-0.0660142	-0.0509786	0.0582099	0.091364	0.0320906	0.00622281	0.172883	-0.0633624	0.102783	-0.00624977	-0.0984497	0.0481924	0.373178	-0.119454	-0.291854	-0.406557	0.12868	-0.244814	-0.0851945	0.107695	0.0119888	-0.0160802	0.00858702	0.0689239	0.000668921	-0.0184315	0.136716	-0.106204	0.0125676	-0.163122	-0.0420029	-0.0936632	0.0571303	-0.000669232	-0.0422476	0.00462651
KPNB1_Q14974	0.0144845	0.00858197	-0.0084708	-0.0667494	-0.0140953	-0.00934397	0.0189924	0.00505595	-0.0489359	0.0217982	0.00691766	0.00954753	-0.0138762	0.0180696	-0.00507373	-0.0409287	0.0590817	-0.0165025	-0.00881211	-0.000335847	0.0163706	-0.0156786	0.000335769	0.0175841	-0.0180277	-0.0271544	-0.0296848	-0.0543947	0.0288533	0.00251234	0.0271013	0.0112775	0.0328892	0.0405817	-0.00912911	0.00459475	0.0211263	0.0592135	0.0121463	0.0193238	-0.0385859	-0.035122	-0.0235195	-0.001002	-0.0127476	-0.0462035	0.00100131	-0.0286191	-0.0102072
KPNB1_J3QKQ5
MOCOS_Q96EN8	0.0186878	-0.0396975	-0.00218514	0.00218184	-0.0230691	-0.0455736	-0.0301775	0.0705112	0.0254671	-0.0638073	0.011753	-0.0345917	0.0293671	0.0253243	-0.00684118	0.0310636	-0.0460284	0.00411311	-0.0558601	0.0246327	-0.0467193	-0.0305686	-0.0220311	-0.0465144	0.0347121	0.0257912	0.0849382	0.0216088	-0.0242323	0.0144277	0.0220473	-0.00412487	-0.0488893	-0.129072	-0.00352811	0.108629	0.0470366	-0.0205772	-0.00563176	0.0035195	0.0266452	-0.0301492	0.0602616	0.0554658	0.00522145	0.0163495	-0.0399916	-0.00548818	-0.148208
RHPN2_Q8IUC4																																																	0.0232527
RPLP1_P05386	-0.467668	0.000413561	-0.0869906	0.204087	-0.0341172	0.0291037	-0.0408858	0.021637	-0.118695	0.0640227	-0.100076	0.0534484	-0.0589933	0.106053	-0.000413679	0.0817166	-0.16873	0.0559462	-0.151953	-0.0585696	-0.0581437	0.0878138	-0.0318108	0.133002	0.0171343	0.0311718	-0.0802359	0.123605	-0.0590842	0.044947	-0.0173403	0.0830231	-0.127091	0.0590783	-0.0634058	0.0519984	-0.0212632	0.133736	-0.0567676	0.0596076	-0.051757	0.0209543	-0.0400622	0.0875252	-0.0492036	0.0326338	-0.0293171	0.0507965	-0.465402
RPLP2_P05387	-0.33104	-0.118067	0.0355631	0.121849	-0.0469088	0.0192795	-0.0195406	-0.0977113	-0.232686	0.0667012	-0.0339082	0.0847214	-0.0473009	0.0815539	0.0666637	0.0661841	-0.0585508	0.0502567	-0.0908279	0.0499929	-0.0366483	0.0731924	0.00625281	0.0495592	-0.092369	-0.0234054	-0.0721023	0.0323276	-0.0471395	0.0933832	-0.00628003	0.0285189	-0.0739754	0.051598	-0.0596079	-0.000827501	-0.0660081	0.0457386	-0.0297471	0.070816	0.000827027	0.0334552	-0.0662697	0.00637607	-0.0933228	0.0413245	-0.0842936	0.0351635	-0.157817
PPP1R9B_Q96SB3	0.0245198	-0.0104427	-0.00218859	-0.0485705	-0.0785599	-0.0807769	0.00218527	-0.00284663	0.0559274	-0.05148	0.0497061	0.013634	0.101016	-0.0239651	0.0724358	0.0281468	-0.0262292	-0.0976338	-0.0707434	-0.125858	0.153217	0.239676	0.181265	0.0995354	-0.0579472	-0.131552	-0.0613027	-0.116755	0.111452	0.0374733	0.0923656	0.0257608	-0.0714808	0.0109887	0.0782259	0.0275989	-0.00504186	-0.0450667	-0.0349932	-0.00160148	0.055795	0.00932813	0.053909	-0.0126448	-0.0205931	0.0737122	0.0015997	-0.0222575	-0.185275
PPP1R9A_Q9ULJ8-3	0.00435968	0.182019	0.139924	0.123894	0.0648034	-0.100106	0.0437415	-0.0556214	-0.0573993	-0.0572384	-0.0812967	-0.00984697	0.095592	-0.00437289	0.105094	-0.0256714	0.052579	0.0502636	0.107465	0.0129563	-0.00491103	-0.0283548	-0.0198084	-0.0788957	0.0615008	-0.0821965	0.0145605	-0.137841	0.0686595	-0.105839	0.00489437	-0.0626124	0.0967413	0.00846541	-0.0239662	-0.0656685	0.0426298	0.111554	0.0395062	-0.0959244	-0.105553	0.14363	-0.00851538	0.0305259	0.102471	-0.050627	-0.0164114	-0.114792	-0.0334343
RUVBL2_Q9Y230	-0.0135866	-0.00599538	-0.0327389	-0.00408527	-0.0165488	0.00807167	-0.0121742	0.0156209	0.000704383	0.031956	0.0048429	-0.000704727	-0.0106514	0.0348023	0.00443073	0.00654787	0.00085907	0.00178685	-0.0335426	0.00459423	0.0107431	-0.00364055	-0.016682	0.0133912	-0.0096767	0.0443183	-0.0144403	-0.000859582	0.010915	-0.00945811	-0.00731354	0.0138489	0.0189659	0.0119475	0.00937012	-0.0110134	-0.00503421	0.0246543	-0.00386637	-0.0385198	-0.0317669	0.00385603	-0.0595482	0.00580608	0.0195768	-0.0192115	0.0100195	-0.00456835	-0.12135
PCBD2_Q9H0N5	-0.184811	-0.065272	-0.0286815	0.055598	-0.0538703	0.0353185	0.0919428	0.00500629	-0.325721	0.19949	-0.0529158	0.21151	-0.0335649	-0.00502372	0.0521182	0.0171474	0.0507355	0.168656	0.0470426	0.14506	-0.178815	-0.29611	-0.239968	-0.215633	0.084582	0.136154	0.166481	0.114866	-0.204952	-0.138974	-0.199162	-0.0486284	-0.00590294	0.107853	0.0159571	0.0865813	0.00587888	0.0497133	-0.0792576	-0.0203179	-0.008488	0.0312467	-0.0931854	-0.0249497	-0.0376274	0.0149442	-0.0219759	0.0658726	-0.0433853
PCBD1_P61457	-0.351171	-0.0855742	-0.020208	0.101306	-0.0291786	0.0177073	0.02951	-0.00724934	-0.214394	0.133092	-0.0961311	0.0708582	0.00721309	-0.0207851	0.123229	0.0835645	0.0358764	0.0152522	-0.00392846	0.0842601	0.0184876	-0.188646	-0.199104	-0.11508	-0.0141142	0.0158721	0.00391779	0.0154254	-0.119378	-0.0105918	-0.100049	0.0415683	-0.00984476	0.123113	-0.0859287	-0.0508925	0.00790974	0.0843144	0.00474003	0.0383685	-0.019972	0.0166465	-0.0153267	0.0463613	-0.0685639	0.00142065	-0.0976389	-0.00142205	0.0181339
DUT_P33316	-0.0399401	0.00297012	-0.0979348	-0.0739271	-0.00824129	0.0214985	-0.0582581	-0.00130482	0.041336	0.169929	-0.0107113	0.0274854	0.00130364	0.0968902	-0.0371354	0.0360954	0.0172941	0.0636392	-0.0377656	0.0447147	-0.0455136	-0.131307	-0.0912527	-0.00889613	0.0333191	0.100529	0.0671821	0.0447348	-0.104832	-0.0274404	-0.062873	0.00884161	-0.0743719	0.0910333	-0.103497	0.0313892	-0.0179316	0.103858	-0.0432545	0.00705097	0.0128487	0.0298502	-0.0070856	0.0327912	-0.0602664	-0.0209755	-0.0660834	0.012819	0.227618
DUT_H0YMP1	0.00865057	0.277038	-0.116017	0.440099	-0.00870275	-0.120999	0.399795	0.11734	-0.236042	-0.333794	-0.263556	-0.0630396	-0.540193	0.075927	0.415424	0.19584
POLR1B_Q9H9Y6-3	0.0124328	-0.0565789	0.0841764	0.0019554	-0.057283	-0.0174968	0.0255631	0.114263	-0.107917	-0.0074209	0.01681	-0.0287272	-0.00195806	-0.138609	0.0117891	0.262533	-0.00219982	0.0270297	0.0230746	0.0582015	-0.0668927	-0.0898596	-0.0104998	-0.202585	0.0151478	-0.0465673	0.0193799	0.00565234	-0.0814021	0.0061125	0.00219647	-0.0722237	0.0210645	0.0187313	0.0222161	0.077707	0.0637457	-0.00654341	-0.0352178	0.0561887	-0.010622	-0.0233569	-0.0278602	0.00651386	0.0247526	-0.0218316	-0.0266901	-0.0214845	-0.00455131
RAB11B_Q15907	-0.176045	-0.0613955	0.197987	0.149449	-0.0172925	-0.0468472	0.115848	-0.0949886	-0.0101257	0.0830705	0.0159382	0.0100552	-0.0478429	-0.0104313	0.111065	0.0589691	0.140567	0.044214	0.106682	0.0373647	-0.0530273	-0.154582	-0.0832133	0.00331985	0.0555756	0.096515	-0.00816198	-0.0279445	-0.00556949	-0.0227916	-0.00143904	0.00143761	0.0424136	-0.020262	0.0404624	0.00232123	0.0391105	0.0382604	-0.00919656	-0.0123701	0.00165047	-0.0240628	-0.0245975	0.00573956	-0.00293755	-0.00165236	0.016386	-0.00473269	-0.0969578
RAB11A_P62491	-0.341575	-0.0207636	0.0802714	0.0583139	-0.0886082	-0.0641614	0.0218211	-0.155543	0.198749	-0.0695897	0.0410336	-0.0944338	0.020469	-0.02554	0.249091	0.0854884	-0.107089	0.0193283	-0.018217	-0.0600504	0.0721261	-0.108653	0.0705952	0.16671	-0.0810374	-0.144267	-0.0847834	-0.178607	0.0837179	0.153793	0.149491	0.0179899	0.0204599	-0.0280617	-0.0152322	0.0404229	0.0302229	-0.0523391	-0.00594209	-0.016078	0.11631	-0.083113	0.107482	0.0628498	0.00591772	-0.00841112	0.0388761	-0.112293	-0.33512
CHMP4B_Q9H444	0.0231001	0.0151073	-0.0530027	-0.0303585	0.0289692	0.0219811	-0.0372882	-0.0195889	0.0387679	0.0128034	-0.0911304	-0.018624	0.00315515	0.11904	-0.0055509	-0.00316207	-0.0466937	0.00551011	-0.0624297	-0.00495275	-0.0432686	0.12968	0.0203396	0.000485237	-0.0500482	0.0096544	-0.0004854	0.0158817	-0.0369724	0.0496916	-0.0715105	0.0306213	-0.133948	-0.0487813	-0.00890495	0.0184857	-0.0573516	0.0114739	-0.00404846	-0.0388351	0.0179074	0.0439086	-0.0195434	0.00900842	-0.058494	0.0877692	0.00403713	0.0130536	-0.195768
CHMP4C_Q96CF2	-0.0437834	-0.0182348	0.00976563	-0.0509228	0.000959114	0.111521	-0.0593268	0.0986203	-0.000959752	-0.0467678	-0.0262536	-0.0211621	0.0720271	0.0997047	0.055133	0.115438	-0.00257278	0.112984	0.0847214	0.0817589	-0.165787	1.23413	-0.135779	-0.251705	0.117237	0.0025682	0.123068	0.0484757	-0.166025	-0.176627	-0.128446	-0.0689407	-0.0902498	-0.0668794	-0.0609156	0.0572132	-0.0211055	0.024193	-0.00298825	0.00298208	0.045288	0.0108658	-0.0493041	0.0684891	0.00598576	-0.042443	-0.0947553	0.051042	-0.123601
IPO4_Q8TEX9-2	-0.0153432	-0.00487961	0.0319022	-0.0156765	-0.0250127	-0.00262827	-0.0154248	0.0485157	-0.00364025	0.0533983	0.0372322	0.0448329	0.0324523	0.00262349	-0.0197304	0.0524449	-0.00489696	0.0336161	0.0159378	0.0174123	-0.0238439	-0.210796	-0.0707363	-0.0595619	0.0215337	0.054421	0.0509402	0.0390026	-0.0297578	-0.0283863	-0.0432662	0.00488039	-0.0572933	-0.0310056	0.0279652	0.0265784	0.0407115	-0.00292971	-0.0207065	-0.0107521	0.0222058	0.0471252	0.0140875	-0.000665269	0.00719914	-0.0121278	-0.0148412	0.000664962	0.00669439
CHD1_O14646	-0.00172002	0.00528841	-0.0333559	0.0219478	-0.0233587	-0.111649	0.00171797	-0.0372988	0.028382	-0.038377	0.0384012	0.0464506	0.0530777	-0.063214	0.0164938	-0.0413239	-0.0845531	-0.000904896	0.0330476	0.000196641	0.0695678	-0.0550501	0.0714317	-0.118211	0.0806805	-0.000196668	-0.0063044	-0.12049	0.0376441	0.00987752	0.0492728	-0.00239192	0.0743044	-0.0116006	0.0105483	0.260186	0.160196	-0.132956	-0.373456	0.102402	0.321658	-0.00011337	-0.0501263	-0.0377452	-0.114136	0.000113361	-0.051984	0.0885045	-0.0262137
CHD8_Q9HCK8	0.0902946	0.0764875	0.0810381	-0.0129693	0.0557926	0.0668207	0.0467358	-0.0272199	-0.0373361	-0.136771	0.00279338	-0.0552994	0.0921018	-0.0539696	-0.0208357	-0.0027988	0.109187	0.0613305	0.106154	0.0835893	0.0603632	-0.0612343	-0.0266397	-0.0642407	0.0526909	-0.0321316	-0.0407021	-0.02975	0.0222747	-0.0219692	0.0216397	-0.0404898	0.00883202	-0.0124311	0.064895	-0.0200499	0.00405911	-0.0477323	0.0322585	0.0521172	-0.00407056	-0.00831943	0.0297795	0.0519159	0.0915621	-0.0470492	-0.021071	-0.0484326	-0.0793071
NAA35_Q5VZE5	-0.0091797	0.0240074	-0.0419255	0.021945	0.0731366	-0.00994083	-0.000854335	0.132569	-0.114965	0.00085383	-0.0148491	0.0570798	0.0343223	-0.0258609	-0.0229584	0.0136798	-0.016527	-0.0427777	-0.0244136	-0.0203048	0.112696	0.245008	0.0891878	0.0741989	-0.0494276	-0.0201715	-0.0673491	-0.0170821	0.0995199	0.0732987	0.0163398	0.0188744	-0.0152475	-0.030772	-0.000669821	0.021216	0.0141227	-0.0289951	0.0374254	0.0140839	-0.0141459	0.00476277	-0.000554511	0.000554298	0.0291244	-0.0337163	0.00305233	-0.0100662	-0.095701
CHD6_Q8TD26	-0.159368	0.161915	0.00748263	0.225886	-0.372647	-0.0860368	-0.00752164	-0.010572	0.401945	-0.138101	-0.0892702	0.0676271	0.0964361	-0.196895	0.0785174	0.314236	-0.00608691	-0.0705516	-0.101881	-0.0546796	0.00886583	0.0693057	0.0744875	-0.0385965	0.0124587	-0.00691188	0.0135218	-0.0927716	-0.0795989	0.0391003	0.00606134	0.110757	0.0851459	-0.0333742	0.0672441	0.0838622	0.185668	0.00693632	-0.187104	-0.096691	0.080323	0.028769	-0.173566	-0.275224	-0.00696983	0.245077	-0.131692	-0.0339669	-0.307591
CHD7_Q9P2D1	0.159177	0.00358233	0.202142	-0.0453084	0.128915	-0.0819274	-0.100635	0.0606439	-0.0602426	-0.00359125	0.12494	-0.0144259	-0.0859416	-0.0187631	0.0480593	0.11063	0.00859668	0.00660634	0.000335358	-0.0716376	-0.00929768	0.00973049	0.0952696	0.0428225	-0.00297091	-0.176952	-0.0575593	-0.167684	0.0450384	-0.000335436	0.0753038	-0.0570915	-0.0683263	-0.0863503	0.141774	0.0371736	0.0566223	0.0553762	-0.0381568	-0.0725403	-0.0852812	-0.127974	0.0968407	0.041057	0.0969808	-0.129744	0.0462254	-0.13386	0.0593791
CHD9_Q3L8U1																	0.0221257	-0.33629	-0.339684	-0.200895	1.45691	2.30132	1.30753	1.43914	-0.0264142	-0.217408	-0.222856	0.00156511	0.72029	-0.256525	-0.00156681	0.0550901	-0.23551	0.0190623	-0.142797	-0.075	0.122352	0.0889962	0.0554052	0.172972	-0.106947	-0.14035	-0.167523	-0.106257	0.353989	0.117138	0.0946376	-0.0193176
CHD2_O14647	0.0905862	-0.0412367	0.0974522	0.142676	0.107838	0.0190655	-0.193226	-0.282323	0.113754	-0.0454912	0.0325457	0.00553651	-0.00555784	-0.00748644	-0.0516512	-0.157049	0.0991691	0.262096	0.279326	0.21887	-0.00526912	-0.252426	-0.128536	-0.170487	0.143449	-0.0336101	0.181419	0.177132	-0.0486504	-0.026366	-0.0630934	0.00524995	-0.19065	-0.354594	0.283556	0.193288	0.150738	-0.0787471	-0.101017	0.0437599	0.0410588	-0.203977	-0.329341	-0.0127422	0.095782	0.0126307	0.0343854	-0.22181	-0.237995
TACC1_O75410	0.166514	0.036738	0.081746	0.00722471	0.0574432	-0.0262673	-0.0203139	-0.0138719	0.226257	-0.0762067	0.0136391	-0.0456036	-0.0632366	-0.0609095	-0.00726108	0.152338	0.0279278	0.0281928	0.15789	0.0648372	0.0179653	0.0891318	0.00423254	-0.00598592	-0.0701375	-0.0941154	-0.00424499	-0.0459171	-0.040286	-0.00519517	-0.039811	0.0498996	-0.137534	-0.152997	0.000277167	0.0292118	-0.00027722	-0.0634237	0.0454008	0.0361085	0.0493037	-0.0239462	0.0657534	0.0691416	-0.0267626	0.161974	-0.0633368	-0.0121971	-0.198449
NCAPD2_Q15021	0.0877216	0.0211435	0.0606003	-0.0284115	0.0348137	-0.0327009	0.0633579	-0.00753511	-0.0365782	-0.0345004	0.0200206	-0.037473	0.00749596	-0.0541623	0.0143769	-0.0531545	0.0479749	0.0260333	0.0454352	0.0132418	0.00333737	-0.0774816	0.0405392	-0.046977	-0.00584286	-0.104241	-0.091212	-0.13926	0.0473181	-0.00334511	0.0398298	-0.0260852	0.0468838	0.00454904	0.052828	0.0100759	0.0497301	-0.0209513	0.0158229	-0.00456343	-0.0220677	-0.0527296	-0.00818063	-0.0268258	0.0481085	-0.0318914	0.0210097	-0.0261579	-0.0417718
SNAPC4_Q5SXM2	-0.0432717	0.00513571	-0.0537749	0.0928571	-0.102103	-0.00515406	0.0451334	0.0547519	-0.0582669	0.014873	0.078388	-0.0822088	-0.0249557	-0.214342	0.00635417	0.114345	-0.00547029	0.00556689	0.109663	-0.0285779	0.0785225	-0.0753407	0.0380031	-0.0334195	0.00544962	-0.168765	-0.108269	-0.108774	0.0543241	-0.0113789	0.00891073	0.018634																	-0.122766
IRGQ_Q8WZA9	-0.165138	-0.00240846	0.0445959	0.123274	-0.0353088	-0.021726	0.0394315	-0.0362192	0.00240445	-0.00605251	0.0266534	-0.0361813	0.0247427	-0.015756	0.0413228	0.0565409	-0.0011962	0.0278279	0.0284335	0.0289391	-0.0117014	-0.0382186	0.0165772	-0.049534	0.0488088	-0.0236137	0.0370226	0.00735667	-0.011916	-0.0295173	-0.0373331	0.00119521	-0.00275252	0.0694912	0.0330769	-0.0138598	0.016328	-0.0110884	0.0136454	0.0741408	0.0780373	-0.0077687	-0.015853	-0.035464	-0.0141867	-0.00521085	0.00274728	0.00963289	-0.0651912
HELZ2_Q9BYK8
PA2G4_Q9UQ80	-0.00439326	0.0132442	0.00847118	-0.0476095	0.0391711	-0.000570368	0.0404827	-0.0285369	0.0223635	-0.0115482	0.0232453	-0.03853	-0.00911123	0.000570142	0.0189269	-0.0354768	-0.0112561	-0.00554349	-0.03262	-0.0281872	0.149535	0.22679	0.134942	0.137257	-0.0378153	-0.0426963	-0.0344514	-0.0353762	0.092716	0.00552227	0.0625914	0.0140938	-0.00695097	-0.00222386	0.0191422	-0.000756305	-0.000844085	0.0169716	0.000755909	0.0150629	0.00178469	0.0049978	-0.0215517	-0.00700665	0.0190192	0.0344866	-0.00248517	-0.0153758	0.0921108
EDRF1_Q3B7T1	-0.00143297	0.0114357	0.00899054	0.0547038	-0.0553854	-0.0264608	0.122195	-0.000436674	-0.135436	-0.0550302	-0.0633892	-0.0385058	0.0520234	0.000436542	0.058156	0.0722475	-0.0138984	0.0159128	-0.0511248	0.0137658	-0.0864524	0.177304	0.0368912	0.014061	-0.189177	-0.0226952	0.139643	-0.178714	-0.0433361	0.0605381	0.130653	-0.140437	-0.0452394	-0.0756444	-0.00762147	-0.0689942	-0.0130007	0.00758141	0.035659	0.0561299	0.0854681	-0.0243295	0.0975768	0.168702	-0.0486282	0.0228622	-0.0226741	0.0413945	-0.0101271
CTH_P32929	-0.0513149	0.00468631	-0.0473806	0.017563	-0.0414455	0.0667351	-0.0160661	0.0829778	-0.0770096	0.212225	-0.017554	0.0722109	-0.0104451	0.0835909	-0.00470158	0.060489	-0.00809409	0.0374972	-0.0437033	0.0482853	-0.0652732	-0.112808	-0.076628	-0.0234882	0.00804893	0.116378	0.0372643	0.0712507	-0.0620343	0.0619142	-0.0570713	0.0532302	-0.0695062	0.118479	-0.0684015	0.00413012	-0.0147684	0.0481002	-0.0475497	-0.0136134	0.027362	0.0586137	-0.00414198	0.0421288	-0.028674	0.0122999	-0.0104907	0.0331907	0.233295
CCT2_P78371	0.00763318	-0.00757169	-0.0387884	-0.0461571	0.0209881	0.00832865	0.0179117	-0.0079801	0.027239	0.021427	-0.0183286	-0.053269	-0.0341418	0.00753216	-0.00897375	0.00758726	-0.031495	-0.0410521	-0.04933	-0.0398985	0.0327276	0.027778	0.024834	0.0489421	-0.0352861	-0.00539469	-0.0454185	-0.0451923	0.0321161	0.0053746	0.0123961	0.0134254	-0.0456925	-0.00941508	0.0139901	-0.0197037	0.00369503	0.0086407	-0.00370451	-0.0108887	-0.0124174	0.0232156	-0.0306413	-0.0068874	0.0205126	0.018028	0.0268245	0.00812441	-0.0171404
NT5C2_P49902	-0.0503025	0.00483503	-0.0119518	-0.0367555	0.0175776	0.0237514	-0.00485129	0.0370938	0.0333294	-0.0860719	0.0327405	-0.0339545	-0.0131394	-0.0168552	0.0221723	0.00883506	-0.00396098	0.00565961	-0.0351213	0.00395013	0.0213958	-0.049625	-0.0118017	0.0323918	0.0483073	0.0670293	-0.00604581	-0.0106942	-0.0157007	0.0267808	-0.00403737	0.0303747	-0.00147355	-0.0548345	0.00944753	-0.00974684	0.016964	-0.0679626	0.0515975	-0.0114514	0.00427124	0.00147204	-0.00562744	-0.0285594	0.0454615	0.0390813	0.0293425	-0.00512927	-0.0801358
NT5C2_Q5JUV3																																	0.0675544	0.0479	-0.00470058	-0.188169	0.0954666	-0.0418172	0.0484462	0.00468531	-0.0173395	-0.165797	0.0280687	0.0204446	-0.0290637	-0.325215	0.0319432	-0.0150014	-0.0287041
DNAH12_Q6ZR08	0.142374	0.0121659	0.145004	0.00225177	-0.00225529	-0.117137	0.173499	0.0681893	-0.893474	0.170637	-0.129209	-0.0496605	0.119474	-0.0800576	-0.0210513	-0.190745	-0.0173904	0.0889228	0.150571	0.537208	-0.260916	-0.00194648	-0.0581768	-0.0567785	0.125083	0.402844	0.0775165	0.00194385	-0.126356	-0.0725528	-0.14704	0.178498	1.47546	-0.112972	-0.342436	-0.0256367	-0.240991	-0.252647	0.0788304	0.025189	0.487557	0.249637	-0.191396	-0.0652806	-0.133944	0.0986605	0.304026	0.429221
NUP188_Q5SRE5	0.0876689	-0.00756108	0.100305	0.0474746	0.0325268	-0.112797	0.0591208	-0.0768604	-0.0701848	0.00752166	0.0265845	-0.0410529	0.0762147	-0.163987	-0.00987309	-0.0416477	0.00808621	0.0226807	0.069521	0.00751823	0.0242507	-0.0856486	0.0109891	-0.0595257	-0.0286013	-0.0604619	-0.0593146	-0.194485	0.0391653	-0.00755761	0.0418498	-0.0331015	0.0948409	-0.0195855	0.0767344	0.0339579	0.0675019	-0.0603046	0.0543387	0.00404935	-0.0440056	-0.104586	-0.00963894	-0.0215475	0.0310401	-0.0330768	0.074206	-0.00406074	0.0148983
SMU1_Q2TAY7	-0.0117328	-0.0211072	0.034283	0.0154104	-0.00561782	0.0092605	-0.0688189	-0.0469775	-0.0476587	0.00559603	0.0139433	0.0391951	0.0857801	-0.0323098	0.0527675	-0.0355546	0.0522163	-0.00908139	-0.0162573	-0.0172577	0.0759687	-0.0856514	-0.0280872	0.00329583	0.0460854	-0.0176754	0.0173817	0.00598402	0.0673755	-0.0862581	0.00535722	-0.00330338	0.00130519	-0.0920127	0.0203029	-0.00130637	0.0262816	-0.0194452	-0.0267035	-0.041575	-0.0218629	0.0192002	-0.0749727	-0.00234262	0.0624196	0.0116267	0.0153101	0.00307274	0.230136
SMU1_Q2TAY7-2	0.069393	0.111445	0.0798729	-0.009813	-0.000575935	-0.113154	0.188446	0.000575705	-0.583674	-0.00130802	0.0201462	0.0758013	-0.0831465	-0.348748	0.204636	-0.188956	0.234862	0.485914	0.395077	0.342311	-0.0837163	-0.713291	-0.444446	-0.815025	0.181065	0.0902816	0.325106	0.0791237	-0.179555	-0.238837	-0.184	-0.0872156																	-0.611711
CIC_I3L2J0	0.495012	-0.0476189	0.486738	0.312432	0.0285477	-0.0686562	-0.0547941	-0.0123179	-0.0865741	-0.0735182	0.0425111	0.0122136	0.0674222	-0.127381	-0.123334	0.194524	0.0448193	0.0202368	0.00238639	0.0706963	-0.0511227	-0.0487907	-0.0496141	-0.053839	0.00909439	-0.0162084	0.0139758	-0.00239034	-0.0969714	0.0568772	-0.0338651	0.0443289	-0.0825374	0.0779665	-0.0225416	0.0353415	-0.0296662	-0.0643029	-0.00277498	0.0451173	0.106281	-0.106352	0.00276965	0.0666227	0.0736897	0.00955423	-0.0483169	-0.0387815	-0.00324458
CIC_I3L1Q4	-0.0377459	-0.116033	-0.401912	0.0636213	0.18014	-0.0510306	0.247747	0.202417	0.0595528	-0.0185254	-0.0776017	0.0182905	0.0595617	-0.0466818	0.0649423	-0.0544611
CENPU_Q71F23	-0.105656	0.0856104	-0.0929103	-0.076954	0.107468	-0.117973	-0.0151161	-0.090302	0.0663241	0.0193642	-0.0141911	-0.0619779	0.0907305	0.066468	0.0140528	0.0696168	-0.0162092	-0.0148783	0.00903865	0.0296209	0.0647636	0.267635	0.106231	0.0235789	-0.0583033	-0.00909563	-0.123686	-0.109724	0.167499	0.176269	-0.0364001	-0.0444147	-0.0941581	0.0545682	-0.0251803	0.0260716	0.0153321	0.0370979	-0.0150071	0.016373	0.0120325	0.0526586	-0.0235088	0.0490894	-0.038715	-0.0121337	-0.0150235	-0.0262611	-0.229414
TONSL_Q96HA7	0.0115897	-0.0330964	0.0851149	-0.0556291	-0.0795361	-0.150011	0.0257028	0.0107439	0.248483	-0.318324	0.1246	0.0386529	-0.0108245	0.0261044	-0.0288056	-0.174496	0.107855	0.0265601	-0.0485787	0.0354509	-0.0324407	-0.00988968	0.0817041	-0.208493	0.0392254	-0.100224	0.0406488	-0.169002	0.00982235	0.123044	-0.128578	-0.0830727	-0.0107204	-0.0408416	-0.0200643	-0.0517447	0.110718	0.040899	-0.0213578	0.0193131	0.0106413	0.0271081	-0.0862886	0.0266954	0.1044	-0.0251353	0.0981867	-0.111679	-0.107873
TAF15_Q92804	0.017321	-0.0101108	-0.0526566	-0.00738612	-0.0631023	0.0302018	-0.0421121	0.0504761	0.0269935	0.0539045	-0.0481157	0.00473681	-0.00475242	0.0525872	-0.0159428	0.113591	-0.00888512	-0.0156236	-0.0768295	-0.0395604	0.00624475	0.13039	-0.0014022	0.0984251	-0.058431	0.0300829	-0.0298757	0.0006035	-0.000603753	0.0167141	0.0364494	0.0441366	-0.0771845	0.0402745	-0.149313	-0.0227826	-0.0255295	0.0333894	-0.0296148	-0.0025034	0.0165507	0.0380845	0.0177345	0.0127824	-0.078549	0.0370908	0.00249907	-0.00679812	0.0262113
FUS_P35637	0.0268955	-0.00918168	-0.0491164	0.00981501	-0.0169511	0.00912361	-0.066824	0.0429459	0.094027	0.0264574	-0.0171055	-0.0168247	-0.050337	0.0473247	-0.0399928	0.0398747	-0.0462236	-0.0936738	-0.0830081	-0.0805366	0.0704079	0.242716	0.083863	0.15007	-0.17058	0.0121291	-0.0343665	-0.0122319	0.0344115	-0.0933556	0.0146924	0.0780615	-0.0704041	-0.0550721	-0.000106361	-0.0466367	-0.0615844	0.00840085	-0.0250554	0.00481734	0.166587	0.000106354	0.0939457	0.0256116	-0.0215871	0.203381	0.00892486	-0.0315349	-0.160959
FUS_H3BPE7																																	0.0861704	-0.669153	0.0125258	-0.099085	-0.0353866	-0.424464	-0.0126355	-0.204316	-0.116796	0.222218	0.51626	0.387059	0.178915	0.420352	0.218634	-0.254116
TDRD15_B5MCY1																																	0.0926124	0.0633668	0.00172195	-0.081244	0.0536213	0.0395474	-0.0206475	-0.00172401	0.0188362	-0.178869	0.267486	0.0748065	-0.0641813	-0.183089	-0.0481382	-0.0933736	-0.273175
SRP68_Q9UHB9	0.131505	-0.00205649	0.117534	-0.0832416	0.0872064	-0.034051	0.061503	-0.0767445	0.0573399	-0.100055	0.0723417	-0.072414	0.0207755	-0.00162743	0.0016256	-0.144237	-0.0169763	-0.13419	-0.00604295	-0.22394	0.209587	0.145962	0.254139	0.126682	-0.111229	-0.23396	-0.0948214	-0.195027	0.209774	0.0723756	0.129945	0.00601774	0.00580322	-0.103324	0.0782501	-0.00611814	-0.0040651	-0.0498019	0.0347891	-0.0450616	0.0298307	-0.113265	0.0445703	-0.0556253	0.0536576	0.00405367	0.0173378	-0.107321	-0.0754234
NOL12_Q9UGY1	0.0533581	0.00485186	0.124128	-0.100569	-0.0678393	-0.0204733	-0.0489691	0.0468052	-0.0830397	0.183252	-0.0522736	-0.0328174	-0.0017168	0.0125811	0.00171476	0.19583	-0.000730058	0.0457068	-0.0648128	0.00365632	0.0285128	-0.0365377	-0.0316291	0.0279357	-0.0836203	-0.00150688	0.000729689	0.0233924	-0.0478728	0.055898	-0.0312147	0.106697	-0.131885	0.0116769	-0.0338927	0.0437884	0.000162185	0.0216199	0.00939744	0.0282538	-0.000162203	-0.0136189	-0.0157279	0.0558244	-0.01922	0.0140125	-0.0827366	-0.00472759	-0.108444
PPP1R21_Q6ZMI0	0.0525165	0.0100978	0.0572574	0.0222268	-0.0274775	-0.0473073	0.047539	-0.051996	-0.0517449	-0.13067	0.012168	0.0219427	0.0680494	-0.0733939	-0.010169	-0.0191843	-0.0407477	-0.00993431	0.0280439	0.0931807	-0.0279244	0.0100772	0.0839568	-0.0278891	0.0192901	-0.129614	-0.0179383	-0.13018	0.0190191	0.0350431	0.00986637	-0.0346669	0.0172335	-0.124004	0.080171	-0.0768619	0.0366381	-0.00176996	-0.0424235	0.013649	-0.0368682	-0.0831847	0.0017678	-0.0761537	0.0125284	0.0895773	0.0355982	-0.0104328	-0.348427
EIF2AK1_Q9BQI3	-0.0452751	-0.0489583	-0.0529157	0.0911148	0.00581032	-0.048975	-0.0752647	0.00466754	-0.0193816	-0.11634	0.0174816	0.0410943	6.43559e-05	0.0113465	0.0134931	-6.43587e-05	0.0122595	0.0147848	-0.0203312	0.143517	-0.0204968	0.0191644	0.00220141	-0.0672727	-0.00823707	-0.0667454	-0.0152654	-0.00220477	-0.0893236	0.00690759	0.0681016	0.0205926	-0.0192221	0.0196111	-0.0234303	0.178641	0.0109713	0.108095	-0.0857359	0.0484797	-0.084941	0.0307983	-0.0110554	-0.0445412	-0.0596684	0.0163696	0.0286255	-0.0424353	0.0631821
APRT_P07741	-0.0969707	-0.00135727	0.0685249	0.0846057	-0.0364828	0.0129173	0.0114953	-0.00279114	0.001356	0.0451895	0.0468385	-0.0493268	-0.0364259	-0.0171503	-0.026796	0.0140586	0.0226698	0.0291471	0.0165109	-0.0212818	-0.0121042	-0.045926	-0.0608968	0.0347782	-0.0265474	0.0364798	0.0477082	0.00236668	-0.0381908	-0.00237056	-0.00905873	0.0230796	-2.66009e-05	-0.0477025	0.034671	-0.0204404	-0.00693862	0.0350819	-0.0115853	-0.0328814	-0.0277436	0.0390002	0.0622889	0.0291913	-0.00616485	0.0520665	0.00393961	2.66004e-05	0.106124
TDRKH_Q9Y2W6	-0.014041	0.0151294	0.0593294	0.00177841	-0.0234518	-0.0495281	-0.0583771	0.00292534	0.0423213	-0.0017806	0.0335417	-0.16368	0.0158137	-0.0561896	0.0625628	-0.117706	0.125717	-0.014265	0.0869819	0.0605648	-0.0452413	-0.145627	-0.0632408	-0.0582156	0.112357	0.00456731	0.105125	0.0181672	-0.110104	0.00406793	-0.00407943	-0.0294038	0.0458946	0.0184145	0.103988	-0.0480724	-0.0113882	-0.0444401	-0.0115572	0.00346523	-0.0210986	-0.0971801	0.0701081	0.0144552	0.0128643	-0.00347358	0.0560214	-0.0717132	-0.0738301
EIF4G3_A0A0U1RQK7	0.0934856	0.00831733	0.0235238	0.00224759	0.0161367	-0.0295936	0.0310967	-0.0113117	-0.0321071	-0.0232294	-0.00182391	-0.0358726	0.00182161	-0.102063	-0.0384255	0.023551	0.051018	0.0855475	0.0708612	0.101314	-0.0574164	-0.0418728	-0.00471505	-0.097647	0.071908	0.00469969	-0.0270727	-0.0585902	-0.040186	0.0481328	-0.0217304	0.0475372	-0.0374099	0.0477447	-0.00164384	0.0380485	0.0196667	-0.00717859	0.0374667	0.0537375	-0.0197094	-0.0307073	0.00113518	0.0293987	-0.00113607	-0.0144548	0.0448396	-0.00328147	-0.142381
EIF4G3_A0A0A0MSA7																																	-0.257719	0.0944527	-0.133695	0.0969175	-0.184905	0.199215	0.0514174	0.0233254	0.147159	-0.254491	0.235534	-0.00321031	0.00320318	-0.0492586	-0.147819	-0.137815
EIF4G1_Q04637	0.0841817	0.0288594	0.0113369	-0.00160078	0.0261682	-0.0223341	-0.00067726	-0.00349586	0.033589	-0.0152895	0.0385436	-0.0286622	-0.0326023	-0.0320337	0.00156444	0.000676942	0.00606154	-0.00399199	-0.0180072	-0.0337437	0.00398098	0.0387131	0.0205626	0.00692737	-0.0239645	-0.0568156	-0.0723916	-0.0997023	0.019236	0.0159771	0.0161322	-0.0125258	0.00388665	-0.0308913	0.0372346	-0.00515841	-0.000611481	-0.00376298	-0.000976186	0.0115417	-0.01879	-0.0187175	-0.015925	0.000611222	0.0245667	0.0391645	0.0315602	0.0219061	-0.0762962
EIF4G1_Q04637-5
GCLC_P48506	0.0573641	0.026901	0.00936769	0.0103765	-0.0294983	-0.0367241	0.0319926	-0.0200618	-0.067078	-0.00532181	-0.0163025	0.00530225	0.134831	-0.0158613	0.0441767	-0.0563247	0.0118415	0.0269882	0.0251654	0.0158977	-0.032469	-0.0543013	0.0109322	-0.083301	0.0300212	-0.0342055	-0.0056868	0.0312393	-0.0180722	0.00566447	-0.0694609	-0.0514204	-0.0109983	0.120127	-0.036762	-0.00233122	0.0207905	0.00232746	-0.0569753	0.093239	0.0470978	0.0286877	-0.027984	0.0374689	-0.0562335	-0.018707	-0.04654	0.0540124	-0.0988541
CCDC91_Q7Z6B0	0.018114	0.0232004	-0.0251227	0.0140293	-0.0132977	0.00207759	-0.0594382	0.0057423	0.0214502	-0.00473462	-0.0508076	-0.00208058	-0.0320296	0.0350375	-0.0441475	0.0326941	-0.00728479	0.00440241	-0.0661839	-0.0141461	0.0329911	0.115051	0.0613907	0.0612119	-0.0467826	-0.00441588	-0.0164638	0.00993518	-0.0326771	0.105105	-0.00928322	0.0649234	-0.101857	0.0233737	-0.0063768	0.0339281	0.0267407	0.00470422	-0.0349198	0.0744173	-0.0306472	-0.00967605	-0.0896703	-0.00471961	-0.0377154	0.0126799	0.00543611	0.0488575	-0.112337
KIAA1549_Q9HCM3	-0.139977	0.067916	0.0179874	-0.161031	-0.122731	-0.198264	0.0374927	0.0590765	-1.15718	0.264853	-0.146724	0.0160076	0.095408	-0.254084	0.0177996	-0.0161872
EEA1_Q15075	-0.053727	0.0172389	-0.0456252	0.0168474	-0.0171047	0.0215663	-0.030352	0.0100785	-0.0214984	0.0374796	-0.0551479	-0.00378164	0.00377175	0.0110184	-0.0283678	0.0231359	-0.033621	-0.0143125	-0.064688	-0.0236464	0.0376525	0.0946804	0.00594359	0.041091	-0.0276327	0.0159455	-0.00601907	0.028494	-0.0106529	0.0360312	-0.00596818	0.00830915	-0.0724714	-0.0231852	0.00545487	0.023392	-0.0208649	0.0260029	-0.00749796	0.00377635	-0.00378626	0.0463651	-0.023012	0.0268375	-0.049003	0.0103141	-0.0329586	0.00990463	-0.149861
MYH14_Q7Z406-2	-0.00996982	0.0182471	-0.0334572	0.0904404	0.0099014	0.0263697	-0.0398152	-0.022077	0.104567	-0.0386688	-0.0358471	-0.0235537	0.0665674	0.0769687	0.0449784	-0.0118449	0.0156724	0.114108	0.0193151	0.06107	0.0194636	-0.0720893	-0.0042025	-0.0311577	0.0474812	-0.000124994	-0.00517083	0.000124983	-0.0578188	-0.0773497	0.0102933	-0.0229974	0.0071909	0.0494138	-0.0356549	-0.0187176	0.0150827	0.00340193	0.011342	-0.0151602	0.0609114	-0.061849	0.0264538	0.00644911	-0.0449304	-0.00340997	-0.0287791	-0.0658797	0.503318
GOLGA4_Q13439-5	0.0199696	-0.00566054	0.0246993	0.0378198	-0.0124241	-0.0367062	0.0109667	0.0200264	-0.0540461	-0.0148253	-0.040122	-0.0228118	0.053421	-0.0334494	0.00563842	0.0372337	0.0245022	0.0456705	0.0551791	0.0592509	-0.0946805	0.0387155	-0.0732693	-0.127095	0.0272914	-0.003353	0.0120048	0.00334522	-0.116297	-0.0573737	-0.0914892	-0.0490225	-0.0260857	0.0197934	-0.0158119	-0.00452365	0.0238959	0.00763338	-0.0110867	0.0529756	-0.0235086	-0.0116187	0.0131941	0.0112263	0.00735822	-0.0111633	-0.0167863	0.00450951	-0.134581
GOLGA4_Q13439	0.337214	-0.23348	1.02318	0.142519	0.281327	0.521143	0.509879	-0.0647393	-0.0135444	0.0134184	0.0607092	-0.423595	-0.134921	-0.345531	-0.220437	-0.0686234																	0.215554	0.129563	-0.0550409	0.0046828	0.152148	-0.150722	-0.0177068	-0.0268158	-0.398341	0.253814	-0.00469805	0.104626	0.0718792	-0.0726108	0.0598579	-0.157608	-0.35091
MYH10_P35580-3	0.0352917	-0.0036182	-0.000846245	-0.00538495	0.00497851	-0.0104936	0.0118494	-0.000243548	0.014329	0.0126963	0.00735283	-0.0184934	-0.011901	0.017931	0.000243507	-0.0327771	0.0126493	-0.0119464	0.000872279	-0.0236006	0.0381372	-0.000872807	0.0173439	0.0186046	0.0121916	-0.00226855	-0.0134018	-0.0445146	0.0437331	-0.0244315	0.0166823	-0.0123724	-0.00163059	-0.013777	0.0191286	-0.0267129	0.0362904	0.00162875	0.0378292	-0.0167607	0.0297817	-0.0234012	0.0356194	-0.0143434	0.0277361	-0.0171017	0.0230481	-0.00286515	-0.0529836
MYH9_P35579	0.0170582	0.01196	-0.0158077	0.0116761	0.00140503	-0.00286274	0.0160016	0.011825	0.0133512	-0.0151777	-0.0101503	-0.0198576	0.000717682	-0.00376039	-0.000718039	-0.0237265	0.0300022	0.01117	0.0110509	-0.0133454	0.0121821	0.014581	0.00124591	0.0199568	-0.00897689	-0.00360997	-0.00475586	-0.00413766	0.00643713	-0.017573	-0.00124698	-0.00869588	-0.00608462	0.00243428	0.000504261	-0.012422	0.0278133	0.00614641	0.0200444	0.0178233	0.0389843	-0.0299546	0.065784	-0.00273901	-0.000504437	-0.00568135	-0.00226038	-0.0297944	-0.0301561
MYH2_Q9UKX2	-0.0746277	-2.07288	0.619644	0.0140424	-2.24576	-1.64316	-0.0141805	0.87883	-0.166068	-0.0978269	0.707899	0.685736	0.619569	-3.198	0.494158	1.02856																	-0.0529573	-0.527565	1.4868	-0.0270169	0.0763262	0.0674626	0.307272	0.0265203	0.0913897	-0.765782	-0.128333	-0.0281281	0.477763	-0.921453	-0.0952337	0.424779
MYH6_P13533	-0.0347315	-1.37927	0.0110461	0.000287819	-1.61806	-1.42543	-0.405351	0.883207	-0.000287876	-0.263845	0.250661	0.356761	0.470843	-1.57421	0.631827	0.954252																																	-0.305332
MYH7_P12883	0.173732	-2.0235	0.259356	0.521779	-2.07186	-1.85753	-0.965962	1.19616	-0.876335	-0.0231435	0.310739	0.77837	0.0227781	-1.74218	-0.609114	0.871478
MYH11_P35749-2	0.459544	-0.00517577	-0.0155904	0.0475339	0.0197847	-0.0242238	0.00515727	-0.046323	0.428136	0.17875	-0.037125	-0.146037	-0.0463014	0.120881	0.0314567	-0.132934	-0.00360303	-0.0278631	-0.0388087	0.00359405	0.264778	0.235138	0.269744	0.288217	-0.0268301	-0.0392673	-0.0328986	0.0256371	0.13422	-0.0839092	0.0426864	-0.127562	0.0585816	0.119489	0.0358115	-0.00708659	0.0398626	0.0697924	-0.00665682	0.0654181	-0.0628814	-0.0235845	-0.00546393	0.0683919	-0.0288114	-0.100402	0.00544331	-0.0187109	-0.0709461
MYH3_P11055																	0.000569194	-0.222056	-0.294213	-0.121958	0.00851672	0.247278	0.177014	0.113887	-0.336786	-0.356007	-0.270158	-0.177445	-0.000569419	0.0627772	0.046003	0.0436432	0.0425067	-0.0724197	-0.0200365	0.126221	-0.0426287	0.254284	-0.340565	0.089952	-0.164853	0.135857	-0.649823	-0.000985363	0.000984691	0.190455	0.0827646	-0.088768
POLE2_P56282	0.155563	-0.00931054	0.0812293	-0.0124089	-0.059823	-0.187943	0.108807	0.00925083	0.0210878	-0.038024	0.121599	-0.0595759	-0.0692247	0.0234743	0.109848	-0.0289754	0.0901946	0.131943	-0.0915983	0.0925841	-0.0546393	-0.274325	-0.0800829	-0.141798	0.144035	0.025494	0.101294	-0.0140802	-0.02447	0.0283903	-0.0115095	0.0114184	-0.0131206	-0.000100129	0.0307738	0.000100122	0.0089249	-0.0102688	-0.000226738	0.0240822	0.0602681	-0.0470239	-0.0542568	0.024003	0.0192776	-0.128734	-0.00631246	0.0144433	0.00145166
CRACR2B_Q8N4Y2																																	-0.196186	0.0135543	-0.102071	0.186514	0.299329	0.104327	-0.0389466	-0.0240865	-0.0615388	-0.0573577	-0.0136829	0.0963021	-0.0628608	0.176956	0.171188	0.258198
THADA_Q6YHU6	0.0683159	0.0173446	0.101916	-0.0261155	-0.0159618	-0.1031	0.00810186	-0.0403816	0.000908067	-0.0827395	0.0320605	-0.0541628	-0.000908639	-0.0550072	0.00435604	0.0178302	0.0827641	0.0538432	0.106565	0.0656081	-0.00124191	-0.0558569	-0.017658	-0.065294	0.0449723	-0.00566909	-0.0517826	-0.0766715	0.0200154	0.0360398	0.00124084	-0.00454893	0.00800821	-0.0153859	0.0614565	-0.00805292	0.00965861	-0.0498817	0.0363623	0.0219123	-0.0139753	-0.0816988	0.0118266	-0.0381018	0.0251322	-0.0119475	0.0464742	-0.0229058	-0.0734755
PRMT5_O14744	0.0398506	-0.0194076	0.0128105	-0.0275352	-0.0132352	-0.00994377	0.0376139	0.0243542	-0.0903132	0.0474653	-0.00634901	0.0208512	-0.0166136	-0.00347363	0.0037486	0.00346528	0.0381571	-0.0473838	0.012727	-0.0278354	-0.0497147	-0.0843702	-0.0355657	-0.00367618	0.00366683	0.0302284	0.02912	-0.00800014	0.0136033	-0.0096706	0.322557	0.313365	-0.0301407	-0.0141257	0.00465574	-0.0599987	0.16728	0.149114	-0.0069568	-0.0575166	0.0882246	0.100704	0.0262193	-0.000423785	0.000423661	-0.0272034	0.019109	-0.03507	-0.000278275
NPRL3_Q12980																	0.0483742	0.160491	0.353214	0.198313	-0.118864	-0.208634	-0.297223	-0.0875103	-0.0256018	0.0910018	0.243522	0.108014	-0.109245	-0.0181083	0.0178838	-0.0764323
GPR107_Q5VW38-2	0.0564931	0.00738595	-0.0259146	0.0169451	-0.0772039	0.013874	-0.0299606	0.032098	-0.0996452	-0.00742396	-0.074727	-0.0335087	0.0208392	-0.0221034	0.0234716	0.0769397	-0.0147821	0.0246034	0.0349225	0.0146322	-0.0501322	-0.0833942	-0.0837464	-0.0488819	0.0479274	0.057553	0.0665457	0.0759744	-0.0769161	-0.0396553	-0.0737326	0.0796974	-0.0228055	0.0194229	0.0277496	0.0291028	-0.0175491	-0.0732875	0.00918099	-0.0184822	0.061549	0.0310786	0.0577898	0.0334437	-0.104819	-0.00923979	-0.114868	-0.0621725	-0.199357
REXO5_Q96IC2	0.0332599	-0.0755642	-0.00794961	0.00790604	0.0221772	-0.046066	0.030977	0.0327774	-0.251748	0.121979	-0.0825057	0.0410019	0.0337849	-0.0534674	-0.0936048	-0.0322298	-0.064037	0.0230026	0.0479609	-0.0233753	0.0804159	-0.178535	-0.108392	-0.0736174	0.131241	0.0384292	0.132333	-0.24434	-0.0661001	0.247911	-0.0408399	0.0760659	-0.0442489	-0.0930056	0.0370967	0.137256	-0.0465983	0.0184507	0.0709519	-0.0186897	0.0295077	-0.0478401	-0.0446842	0.0897574	-0.0712914	0.149595	0.0189197	-0.0266094	-0.213683
MIEF1_Q9NQG6	0.0745532	0.0471296	0.172649	-0.00844657	-0.0319317	-0.037004	0.0083974	-0.117266	-0.0226947	-0.118735	-0.0133409	0.0626773	0.0945817	-0.219457	0.0484771	0.088169	0.101181	-0.0822323	0.0883183	-0.0546677	0.0122252	-0.00640012	0.0631377	-0.0571539	-0.0878691	-0.241671	-0.159565	-0.209745	0.104968	0.0977374	0.0361114	0.00637185	-0.0133573	-0.0138486	0.0132348	-0.0407276	0.103619	-0.162925	0.0249308	0.126949	0.0443523	0.0354704	0.072278	-0.154491	-0.142145	-0.0376818	0.0855308	-0.109962	0.25346
RBM17_Q96I25	0.00310146	0.0203216	0.0177504	-0.00660675	0.00558196	-0.0133624	-0.00580929	-0.00310814	-0.0416885	-0.0515679	0.00966172	-0.108756	0.0255385	-0.0324011	0.00482289	0.0347167	0.0105382	-0.0518816	-0.00291556	-0.10041	0.049509	0.0489084	0.058059	-0.0245173	-0.0876556	-0.113749	-0.064214	-0.0900863	0.0487572	0.00290968	0.00683207	0.0118103	0.00220665	-0.0110795	0.0420419	0.0162002	0.0167418	-0.034204	-0.0228819	0.00762671	-0.0345458	-0.0613774	-0.0243417	-0.00954034	0.0323748	0.0256323	0.000567221	-0.000567444	-0.0530213
APOB_P04114	0.00115486	0.00393333	0.0337971	0.0253226	-0.00414758	0.0120561	0.0248512	0.0531386	-0.158863	-0.0221713	-0.0339773	-0.00702741	-0.0175351	-0.00115578	-0.0538107	0.00442539	0.0218346	0.0997582	0.0351672	0.0849262	-0.219501	-0.228213	-0.168461	-0.195835	0.107088	0.0778602	0.0736153	0.0941112	-0.180709	-0.0377066	-0.133514	-0.0221701	0.155464	0.27643	-0.126389	0.0507094	0.0546026	0.152859	-0.052557	0.111002	-0.086162	-0.105014	0.321124	0.206902	-0.0930572	-0.243932	-0.123879	-0.0544524	-0.138715
CHMP4A_Q9BY43-2	-0.0590059	0.0295652	-0.08438	-0.0211773	0.0200014	0.0232966	-0.0133455	-0.00402774	-0.102702	0.0309275	-0.0553619	0.0196498	0.00401653	0.065505	-0.0225852	0.0177303	0.063495	0.205515	0.200298	0.160148	-0.2445	-0.311553	-0.244511	-0.20864	0.245	0.199627	0.234292	0.12969	-0.198845	-0.10514	-0.12467	-0.0664187	-0.138935	-0.0456741	-0.0602629	0.0385724	-0.0486902	0.0464169	0.0131682	0.0834113	0.00518874	0.0734314	-0.0259893	0.103612	-0.0387924	-0.00520747	-0.0665714	0.0257318	-0.147096
TM9SF1_O15321	-0.140272	-0.114985	-0.116206	0.277442	-0.071439	-0.273979	0.0732544	-0.265478	0.191059	-0.130484	0.0732323	0.310321	-0.099869	0.286051	0.108858	0.0680678																	0.00862107	-0.00362888	-0.00935657	-0.0706766	-0.0268994	-0.0634693	0.0239666	0.0789274	0.00387187	0.00361977	-0.0893807	-0.0514523	0.105995	-0.156349	0.0143193	0.0412749	-0.0165325
CHMP4A_H0YIN6	-0.0583727	-0.0537794	0.0217578	-0.0463469	-0.0505388	-0.0922098	0.153695	0.178344	-0.26261	0.0660447	0.0299642	0.091034	0.0215344	0.0433852	-0.0218607	-0.132074	0.0261401	0.404547	0.339243	0.310189	-0.120813	-0.427272	-0.0266224	-0.155501	0.195536	0.119491	0.432125	0.469145	-0.0525739	-0.187331	-0.120818	-0.272803	0.145635	-0.055253	-0.0293682	-0.0915197	0.0082215	-0.00826862	-0.118534	0.520948	0.52086	0.066498	0.741537	0.313506	-0.431982	-0.0120966	0.119252	-0.228848
EXOC3_O60645	0.150499	0.00383678	0.0853407	-0.0447017	0.0193275	-0.0862396	0.0641143	-0.101155	-0.087997	-0.0991082	0.0820406	-0.00384701	0.0561358	-0.107545	0.034122	-0.093059	0.0824834	-0.0159982	0.103122	-0.0642709	0.0158227	-0.13053	0.106944	-0.0742298	0.123238	-0.125513	-0.133252	-0.0631134	0.0789287	0.0818322	0.10658	-0.0840995	0.0784228	0.000993447	0.046146	-0.00466629	-0.000371139	-0.0771756	0.0329984	-0.0245726	0.000371044	-0.1199	0.00273292	-0.0760343	0.0398811	-0.0744366	0.0076211	-0.0918059	-0.0146455
SNRNP40_Q96DI7	-0.109157	-0.0288723	-0.112504	-0.00820481	0.0379807	0.087671	-0.0730482	0.0131895	0.0541357	-0.0317096	0.00815841	-0.0710661	0.0332831	0.0124613	0.031064	-0.0471953	0.082853	0.00156733	0.159259	0.0180434	-0.0446883	-0.18607	-0.018345	-0.131076	0.0915766	0.0250478	0.175298	0.15849	-0.00156904	-0.002165	-0.0184203	-0.0332755	-0.0300006	-0.0159616	0.0241061	-0.0326237	0.0183924	-0.0310479	0.0309514	-0.0109794	-0.0288901	0.0144042	0.00897311	-0.0506238	-0.00111757	0.00111671	0.351423	0.31164	-0.0561535
VPS35L_Q7Z3J2	0.00783495	-0.00787774	0.0370784	-0.0358913	0.049232	-0.0558975	0.0365366	-0.0290634	0.0163407	-0.120076	0.0191943	-0.0158637	0.0810059	-0.0542752	0.0663397	-0.0451238	0.0603958	-0.00388283	0.109353	0.0201107	-0.00348913	-0.0367756	0.00348071	-0.0528297	0.0363698	-0.0459617	0.00609689	-0.0648234	0.0841256	-0.0582831	0.0304571	-0.0303938	0.00237834	0.00739521	0.0236054	-0.00748179	0.0553547	-0.015505	0.0103669	-0.00238227	-0.0178887	-0.158736	0.00748202	-0.0329948	0.0310484	-0.0941135	0.0419483	-0.0056224	-0.137049
OXSR1_O95747	0.116298	-0.00163265	0.106745	0.0343817	-0.0105791	-0.0263467	0.0284855	-0.031277	-0.0198692	-0.0510084	0.0228264	-0.00199545	0.0016308	-0.0717942	0.0309522	0.0315462	0.000806404	-0.000806855	0.010407	-0.0548331	0.0331271	-0.025758	0.0456853	0.0222436	-0.0385087	-0.0879363	-0.0590274	-0.0885595	0.0412064	0.0362161	0.033666	-0.00745661	-0.0110302	0.0368068	0.0277635	0.0196949	0.0181095	-0.0511064	0.0495719	-0.00585097	-0.0282236	-0.0158174	-0.00622874	-0.0915898	0.00582733	0.0401439	0.0293248	-0.0242422	-0.113184
STK39_Q9UEW8	0.045245	0.0381138	0.0188899	0.0049807	0.0101224	-0.08629	-0.0255089	-0.0870473	0.0325111	-0.092543	0.0207345	-0.0803048	-0.00499796	0.0276157	-0.0455795	-0.182607	-0.0869581	0.0431156	0.0224353	0.0920164	-0.00257286	-0.0242978	0.0531938	-0.0768907	-0.00970641	-0.0435404	0.00256828	-0.0901671	0.0604605	0.0955665	0.0450544	-0.0234301	0.0525851	-0.0169604	0.0550471	0.037399	0.143517	0.030186	-0.0418616	0.0373541	-0.066451	-0.0239925	-0.0598398	0.00873299	0.00537723	-0.00539734	-0.00849691	-0.0820106	0.0379514
VWA5A_O00534	0.0940512	-0.0241633	0.13098	-0.0636819	-0.0489756	-0.0283146	0.0567239	-0.0135647	-0.0595046	0.0390253	0.0134383	-0.0371453	0.0636525	0.0550625	-0.0368165	0.110252	0.0347922	0.0143849	0.0494755	0.0456964	-0.145303	-0.256307	-0.121038	-0.150207	0.123754	0.0463418	0.0778138	0.0302181	-0.10893	-0.0619467	-0.0865783	-0.0145297	0.00748564	-0.0443353	0.103101	0.0699144	-0.0685349	-0.0012987	0.00129753	-0.00869795	0.019362	-0.0443543	0.0249838	0.0148687	0.034432	-0.00472753	-0.121502	-0.0574241	-0.0462494
RNF13_O43567
FEM1B_Q9UK73	0.00302848	0.0656487	0.142946	-0.0350119	0.138728	0.00525024	0.182877	0.0166847	-0.31863	-0.10966	-0.0261255	-0.0227414	0.120418	-0.0245558	-0.00303485	-0.139564	0.0633425	0.122777	0.131475	0.112829	-0.0390238	-0.367797	-0.207329	-0.19814	0.110348	0.00238434	0.0689972	0.0622438	-0.114405	-0.121867	-0.175063	-0.00238828	-0.0104233	-0.0565337	0.0210147	0.0140644	0.0379836	-0.0316212	0.0649227	0.0103485	0.0256131	-0.0391104	-0.0130933	0.0524325	0.0198105	-0.0144407	-0.0763278	-0.0383656	-0.770356
NUFIP2_Q7Z417	0.0747621	0.0061299	-0.0491532	-0.0304452	-0.021979	-0.0284711	-0.0511821	0.0395769	0.0387885	0.0886549	-0.0360546	-0.0413012	0.0106504	-0.00615606	0.0265067	0.012958	-0.0564985	0.0199384	-0.0484298	-0.0115693	-0.0416931	-0.00941878	-0.0458758	0.025371	0.00846078	0.0314767	0.00811196	0.0354683	-0.0626876	0.0337603	-0.00815783	0.0120588	-0.0142766	0.0104248	-0.0546551	-0.0108913	-0.0371282	-0.0615997	-0.00657219	0.0212069	0.00303423	-0.00197707	0.0381896	0.067676	-0.0506262	0.0429224	0.0921615	0.00197436	-0.131222
PRDX6_P30041	-0.0892099	-0.00377084	-0.00173801	-0.00761306	-0.00832098	0.00792667	0.00848898	-0.0137754	0.0398539	0.014628	0.0400537	-0.012981	-0.00326873	0.00173592	0.0245404	0.0247764	-0.01361	-0.0388055	-0.06744	-0.00838599	0.0777039	0.0721486	0.0242113	0.0629502	-0.0486151	-0.0164509	-0.0170884	-0.0338015	0.0391172	0.0204976	0.00833752	0.0163841	-0.0442362	0.0171188	0.000197342	-0.0416774	-0.00342374	0.0302546	-0.0261515	-0.0119426	0.0372582	0.00375641	0.0343738	0.0268804	-0.0180815	0.0321949	-0.0121195	-0.000197369	-0.107829
RPL11_P62913	0.0319998	0.0380158	-0.0107573	-0.0472618	0.0808032	-0.0678761	0.0106776	-0.0906602	0.0422265	-0.0249927	0.0177258	-0.0133291	-0.0390162	0.0650929	0.0121514	-0.18178	0.0636755	0.0243592	0.0400541	0.0116462	-0.0577209	-0.00656099	0.0041398	-0.014513	0.00599533	-0.00415171	-0.00476582	-0.0449183	0.0129427	-0.0266779	0.0124549	-0.00553325	0.0918977	0.121986	-0.0281895	-0.0167269	0.070822	0.101721	-0.0245473	0.0188036	-0.0132464	0.0214032	-0.0298112	0.0405237	-0.0682794	-0.0421087	-0.000174434	0.000174413	0.0751158
GHDC_Q8N2G8	0.0374376	0.044254	-0.053059	0.12344	0.00180912	-0.115998	0.0313175	-0.00181139	-0.0589403	-0.0994289	-0.0877777	0.0219028	0.151589	-0.0989856	-0.0307034	0.176216	0.119089	0.022135	0.00370592	0.00538372	-0.0171218	0.00294473	-0.00295075	-0.0339639	-0.0268708	-0.19199	0.0530609	0.0684993	-0.0287611	0.0610434	-0.00521361	-0.0575008	-0.00815413	0.0510405	-0.118796	0.0395446	-0.0276059	0.000270473	0.0244441	-0.000270524	-0.133453	-0.135928	0.155602	0.0315369	-0.061148	-0.0961161	0.0526196	0.0876368	0.0496284
PDLIM4_P50479	-0.0565973	-0.00935802	0.051088	-0.168414	-0.0187002	0.0181996	0.0386504	0.0712081	0.00885403	-0.0347551	0.00399207	-0.00400315	0.00776712	-0.00435629	-0.0481728	0.0758033	-0.021628	0.00870191	0.0157556	-0.00104408	0.0149564	-0.00923409	-0.0792773	-0.0324971	0.0647082	0.0496223	0.0589888	0.0355113	0.00104333	-0.0254387	-0.031069	-0.0590396	-0.040809	-0.0802478	-0.0266432	0.0188278	-0.0606396	-0.0543456	-0.0077571	0.0156145	-0.015548	0.0295823	0.0660235	0.0218753	0.00771562	0.0536037	-0.0340114	0.0270909	-0.244854
CCDC85C_A6NKD9	-0.00713881	0.114517	-0.0758979	0.0919408	-0.0102684	0.00710366	0.113869	0.0276746	-0.186118	0.113648	-0.0869527	-0.0379175	0.155411	-0.0570065	0.0191899	-0.013802	-0.0257274	-0.0588064	-0.0439524	0.107374	-0.0943163	-0.120966	-0.129929	-0.0223374	0.0683859	0.075026	0.0589059	0.23206	0.131677	0.0219968	-0.111211	0.111376	-0.23552	-0.0325583	-0.0239472	0.03267	0.141303	0.0235562	0.0797548	-0.0555017	-0.0746906	-0.0490506	-0.0622868	0.133855	-0.034447	0.0360939	0.0525937	0.0493088	-0.347869
SPECC1L_Q69YQ0	9.25928e-05	-0.0557385	0.0395267	-0.0318785	-0.108227	0.090037	0.0738088	0.172495	-0.228086	0.197153	-9.25987e-05	0.0122125	-0.0683289	-0.017542	-0.0624744	0.128476	-0.0617034	-0.0257289	0.0164046	-0.0383372	-0.000648316	-0.122561	-0.0978025	-0.084239	-0.0091706	0.152634	0.166817	0.0495507	0.00940939	0.129909	0.000648025	0.192961	0.000867824	-0.000868346	0.0205778	-0.0658238	0.0241449	-0.0476766	0.0351189	-0.0104525	0.00755452	-0.0221679	0.0396596	-0.0291051	0.0127954	-0.0660177	0.00452546	-0.0215474	-0.214617
RDX_P35241	0.0229604	0.0312075	-0.00319878	0.00944598	0.0170733	0.0231334	-0.0440406	-0.0283537	0.146963	0.0077463	-0.00456291	-0.0584608	-0.0614298	0.0031917	-0.0259159	-0.0756941	-0.0996971	-0.0684085	-0.188199	-0.0846769	0.330876	1.09307	0.53868	0.552714	-0.123134	-0.0957604	-0.12351	-0.0631366	0.207087	0.0884428	0.170556	0.060489	-0.0451825	0.000861601	-0.000862116	-0.014453	-0.0344936	0.0447639	-0.0216878	-0.0140698	0.0478649	0.026446	0.0234943	0.0453716	-0.018087	0.0671497	-0.0497016	0.0267276	0.104988
CROCC_Q5TZA2	0.0174233	-0.0686404	0.119703	0.0381389	-0.0645745	-0.0368048	0.133603	0.0460223	-0.0176363	-0.0460467	0.0529237	0.0413483	-0.0515979	-0.119259	0.0391126	-0.0660328	0.0604284	-0.281872	0.0119496	0.290526	-0.146677	-0.167442	-0.227186	-0.232962	0.0201004	0.205447	0.170575	0.209673	0.0201369	-0.0120494	-0.229676	-0.235383	-0.00468762	-0.0467018	0.07749	0.320689	0.00467244	0.205629	-0.0915147	0.0492299	-0.0720022	-0.0797961	0.0513249	0.23367	0.0296996	-0.0992662	-0.0919539	-0.0580403	0.0436647
CROCCP2_Q86T23																																																	-0.53695
EZR_P15311	0.00818731	0.00223982	-0.0118596	-0.0327798	-0.0151252	-0.00675666	0.00661705	0.0151787	0.0249804	-0.0122324	-0.0106438	-0.0394356	0.00916814	0.0177238	-0.0022433	0.0363957	-0.0238491	-0.0611591	-0.0720372	-0.0961581	0.121332	0.128286	0.120335	0.115038	-0.0508027	-0.022358	-0.0194109	-0.0412952	0.0832777	0.0191532	0.0840126	0.0316073	-0.0576891	0.00822062	0.00336419	-0.0519713	-0.048129	-0.02364	0.0222421	-0.046646	0.0218803	-0.00337206	0.0275639	-0.0207255	0.0122224	0.0159342	0.0200309	-0.020559	-0.0427215
MSN_P26038	-0.0397142	-0.000515946	-0.00487298	-0.0498913	0.0300984	0.00769873	0.0421142	-0.0527006	0.0633059	-0.0122753	0.000515762	-0.0650062	0.0156289	-0.0101328	0.0281102	0.0502088	0.0317105	-0.0421845	0.00802082	-0.0644812	0.0137077	0.0888596	-0.00324682	0.0141316	-0.0224292	0.0116624	-0.00263025	-0.0384735	0.0264827	-0.0109764	-0.000393306	0.000393199	0.0154493	0.0354069	0.0259523	-0.0447699	-0.0214533	0.0139128	0.00937169	-0.0232482	-0.00943297	-0.0147609	0.0209019	-0.0104602	0.00971409	-0.0203854	0.0192457	-0.0136419	-0.0400364
CARS2_Q9HA77	-0.0648402	0.040765	-0.0121959	0.0120937	-0.0944568	-0.0534388	0.0838638	0.11485	-0.0381484	-0.0566892	0.0178193	-0.0189071	0.111356	0.0164907	-0.0778678	0.0473169	-0.0337912	-0.0546268	-0.0106903	0.00763833	0.0248047	-0.0644106	-0.0357446	0.061063	0.0460611	0.0993991	-0.0292311	-0.0146894	-0.00767899	0.0470201	0.0187847	0.0317507	-0.0412919	0.145895	0.0121522	0.0799381	-0.0423877	-0.0241322	-0.00220125	0.117377	0.0227765	0.0021979	-0.0108325	-0.0688941	0.0547005	-0.0036018	-0.0204307	0.0172787	-0.193561
EML4_Q9HC35	0.00246919	0.0451169	-0.00688163	0.00728025	0.00796132	-0.00548324	0.000497863	0.0123108	-0.0353624	-0.0251734	-0.000498035	-0.0311821	0.0404283	-0.0203981	0.014492	-0.000587977	0.00135489	0.0246896	-0.00135617	0.0521291	0.0116112	-0.0468402	-0.0584388	-0.0711871	0.0345231	0.0565737	0.0482862	0.0260736	-0.00862921	-0.0288565	-0.0297882	-0.0118564	-0.0507283	-0.0166491	-0.0266533	0.00599404	0.0168989	0.0169035	-0.00698703	0.00960993	-0.0182754	-0.0156186	-0.0319915	0.0104112	-0.00601905	0.00783636	0.00743048	0.022956	-0.105859
ISCU_Q9H1K1	-0.00793203	0.00266979	0.139212	0.11479	-0.0681892	0.0601578	0.0269964	-0.0211691	0.0220128	-0.0205489	-0.0108245	-0.00783191	0.00773205	-0.00923887	-0.00267474	0.0200707	-0.0610415	-0.0299692	-0.0602638	-0.0144863	0.078363	0.0304389	0.0438577	0.0158524	0.00292749	-0.0495378	0.00183861	-0.00240217	0.0297472	-0.00206356	-0.00184096	0.0391012	-0.0199794	-0.0134785	0.00417255	-0.00121971	-0.0465668	0.0437005	-0.0391028	0.015763	-0.0225056	0.0888849	-0.0458806	0.0285672	0.00121868	0.0702009	-0.0147108	0.0871246	0.000900507
EML3_Q32P44	0.000599987	0.0559152	0.0301795	-0.0201791	-0.0145623	0.00942694	-0.0379588	-0.0363373	-0.0235541	-0.0466174	0.00368925	-0.0234815	0.0113184	0.00258358	0.02948	-0.000600237	0.0175904	-0.0176816	0.0451625	0.0111996	0.0258732	-0.0574171	-0.00709088	-0.067796	0.0451425	-0.0553737	0.0511071	0.0070562	-0.0205506	0.0228402	-0.0156378	-0.0595474	-0.00138288	0.00704589	-0.0421689	0.0158017	0.0146049	-0.0630436	-0.0414409	0.0231429	0.00805422	0.00138155	0.0308889	0.00351346	-0.0205121	-0.0303714	-0.019001	-0.0155645	-0.0481338
INTS14_Q96SY0	-0.0341891	0.063243	-0.0217163	-0.0193598	0.0525804	-0.0209871	0.0652279	0.00290564	0.10594	-0.0869928	0.0105032	-0.0335334	0.118352	0.0151494	-0.00828343	-0.0029115	-0.0251146	-0.000740532	-0.054778	0.000740152	-0.000882942	-0.140612	0.0373792	0.0385509	0.0153368	0.00152235	-0.0160099	-0.0544109	0.0100576	0.00890364	0.0394089	-0.0417345	-0.0867539	0.00916713	-0.0275332	0.0186821	0.0244536	-0.00139183	0.0180882	-0.0554017	-0.033181	-0.0431282	0.00390189	0.0361383	0.013174	0.00139048	-0.00632915	-0.0512545	-0.193328
DPYSL2_Q16555	-0.104482	-0.0443235	-0.0154194	-0.0341681	-0.0498033	0.0270905	-0.0415509	0.0152564	-0.0371595	0.0311376	0.0152953	0.0655268	0.0967565	-0.0167123	0.0183103	0.0741901	-0.04491	0.033433	0.0259569	0.0666541	-0.0627198	-0.0380426	-0.0344871	-0.0533932	-0.00332398	0.0403459	0.048223	0.103467	0.000890273	-0.000890822	-0.0297743	0.111278	-0.11041	-0.00990989	-0.0660316	-0.0117931	0.0480024	-0.0214249	0.0891298	0.0755469	0.025305	0.0253665	0.0572765	0.000504825	-0.0128279	-0.0115363	0.0408402	-0.000505002	-0.182041
DPYSL3_Q14195-2																																																	-0.528
PAFAH1B3_Q15102	-0.0321418	-0.117724	0.197081	0.0408543	-0.0296601	-0.0177102	0.122465	-0.0374712	-0.049264	0.144884	0.0909424	-0.0462757	-0.00495449	0.00493753	0.086776	0.0602047	0.0239766	-0.0268215	0.00265873	-0.00531251	-0.000234388	-0.0804842	0.00023435	-0.0313357	0.00951304	-0.0512927	0.0237631	-0.0253027	0.00749071	0.0201267	0.0164514	-0.00565787	0.0543783	-0.0191637	0.086129	-0.0253144	-0.0288319	-0.0200204	0.0239652	0.0027417	-0.0502786	-0.0645415	-0.00274692	-0.031475	0.0853174	0.00782375	0.0218039	0.00542875	-0.0957695
PDLIM1_O00151	-0.100995	0.000959034	-0.0607516	-0.0197476	-0.000779468	0.0167471	-0.0433279	-0.0152114	0.0427797	0.0357806	-0.00703042	0.0093496	0.0233642	0.107576	0.000779048	-0.00992893	-0.110911	0.0135838	-0.126121	-0.026567	0.0332817	0.0814955	0.0179892	0.058129	-0.0444097	0.0108961	-0.010979	0.0368512	-0.0400209	-0.0369926	-0.0317102	0.0145556	-0.0586616	0.00572627	-0.0406121	-0.0332546	-0.00133055	0.0163602	-0.0281201	0.0101351	0.0226609	-0.0215288	0.0430587	0.0285086	-0.0404862	0.0669287	-0.0155743	0.00132932	-0.105273
TCOF1_Q13428-4	0.0142283	0.0099931	0.00491552	0.00122699	-0.0270991	-0.00122804	-0.00849528	0.033902	-0.0594987	-0.00403429	-0.0785888	-0.0591645	0.0157354	0.0114154	-0.0146614	0.0263842	-0.0291519	0.0420478	0.0117896	0.0281265	-0.102398	-0.0767273	-0.101088	-0.0487892	-0.0106496	0.057103	0.0251365	0.0635424	-0.0966181	0.0105716	-0.0888722	0.0302791	-0.0135173	0.00119011	-0.013946	-0.00119109	-0.0187743	0.0293354	0.00515005	0.0163652	-0.00904546	0.0657101	0.0773607	0.0746486	-0.0580447	0.0294688	-0.0383292	-0.00366643	-0.13043
TCOF1_Q13428-3	-0.180705	0.00331482	0.0230363	0.354811	-0.168743	0.0434132	-0.0501875	0.252674	-0.30408	0.157736	-0.00332246	0.0230022	-0.00971836	-0.139682	-0.0810041	0.301951	0.00510056	0.0420601	-0.30244	0.25651	0.00215654	-0.48945	-0.00215977	-0.0639628	-0.170222	-0.520923	-0.193036	0.363087	0.0919892	-0.0200142	0.0791877	0.348561
TCOF1_Q13428-6																																	-0.107757	0.00624219	0.0184329	-0.0687264	-0.0413419	-0.0352482	0.0780749	0.0973863	0.191754	0.0758468	0.0997743	-0.0813297	-0.0208212	0.213196	-0.00626931	-0.171762
CLEC11A_Q9Y240																																																	0.254276
UCKL1_Q9NWZ5	-0.0218896	0.0806166	-0.0242129	0.0553261	-0.0188077	0.0397837	0.0296025	-0.00964087	0.000836152	-0.0337471	-0.00794161	-0.000836637	0.0757799	-0.0437084	0.0367211	0.0118213	-0.0302392	0.0771585	0.0320417	0.00613243	-0.00905565	-0.118766	0.0443777	-0.038872	0.108809	0.00797615	-0.0196775	-0.00615861	-0.0361795	-0.0317455	0.0114894	0.106897	-0.0601957	-0.0974223	0.0328291	-0.037093	-0.0295372	-0.00786273	0.0465217	0.0426561	0.0391685	-0.0230871	0.0187183	-0.0678731	0.10451	0.00782011	0.114412	-0.0369628	-0.187955
CCNA2_P20248	0.00074963	0.014026	-0.0307475	-0.0814935	-0.0528081	-0.00596477	-0.0214139	0.00976306	0.0332589	0.019943	-0.00592307	-0.0270449	0.00104246	0.0259128	-0.00075002	0.0100793	-0.012756	0.0646469	-0.00517846	0.103579	-0.142313	-0.223935	-0.0976185	-0.0854867	0.162142	0.174984	0.0862928	0.0947089	-0.106017	-0.0290339	0.00515994	0.0821643	-0.107848	0.0726964	-0.117106	0.0141734	-0.00659389	0.0446792	-0.0130656	0.0148266	0.0296617	0.0500197	-0.0104976	-0.0242278	0.000988276	-0.0435392	0.0178674	-0.000988954	-0.172757
AP1G1_O43747-2	0.0301314	0.0121598	0.0499724	-0.0218021	-0.0252474	-0.0187395	-0.00513621	0.0182254	-0.134511	0.0587925	0.0179265	-0.0158866	0.014456	-0.0172235	0.00511799	-0.0393155	0.0415011	0.0548019	0.0248483	0.0430291	-0.0469849	-0.144694	-0.0665594	-0.109327	0.0529344	0.0792665	0.0783695	0.0279745	-0.0464789	-0.0252838	-0.0805642	-0.0360154	0.0215856	0.0295146	-0.0199607	-0.0111369	-0.0210458	-0.00199653	-0.00757414	-0.0208137	0.0239305	0.0361277	-0.0210012	0.0247393	0.0117622	-0.0103408	0.0138485	0.00199377	0.0619435
[truncated: 8,629 more rows]
[truncated: 111 more columns]

## Sheet: Example plot
	DMSO-00001_Log2FC_Rep1	DMSO-00001_Log2FC_Rep2	AZD1152_Log2FC_Rep1	AZD1152_Log2FC_Rep2	Pictilisib_Log2FC_Rep1	Pictilisib_Log2FC_Rep2	HY-15846_Log2FC_Rep1	HY-15846_Log2FC_Rep2	Bafetinib_Log2FC_Rep1	Bafetinib_Log2FC_Rep2	AS-605240_Log2FC_Rep1	AS-605240_Log2FC_Rep2	MP7_Log2FC_Rep1	MP7_Log2FC_Rep2	Ibrutinib_Log2FC_Rep1	Ibrutinib_Log2FC_Rep2	DMSO-00002_Log2FC_Rep1	DMSO-00002_Log2FC_Rep2	GSK2656157_Log2FC_Rep1	GSK2656157_Log2FC_Rep2	GSK-1070916_Log2FC_Rep1	GSK-1070916_Log2FC_Rep2	Y-33075_Log2FC_Rep1	Y-33075_Log2FC_Rep2	SGI-1776_Log2FC_Rep1	SGI-1776_Log2FC_Rep2	Gandotinib_Log2FC_Rep1	Gandotinib_Log2FC_Rep2	GSK-LSD1_Log2FC_Rep1	GSK-LSD1_Log2FC_Rep2	Flavopiridol_Log2FC_Rep1	Flavopiridol_Log2FC_Rep2	DMSO-00003_Log2FC_Rep1	DMSO-00003_Log2FC_Rep2	GSK2606414_Log2FC_Rep1	GSK2606414_Log2FC_Rep2	Duvesilib_Log2FC_Rep1	Duvesilib_Log2FC_Rep2	Saracatinib_Log2FC_Rep1	Saracatinib_Log2FC_Rep2	HY-10181_Log2FC_Rep1	HY-10181_Log2FC_Rep2	GSK2334470_Log2FC_Rep1	GSK2334470_Log2FC_Rep2	JQ-1_Log2FC_Rep1	JQ-1_Log2FC_Rep2	ER-27319_Log2FC_Rep1	ER-27319_Log2FC_Rep2	DMSO-00004_Log2FC_Rep1
[truncated: 1 more rows]
[truncated: 111 more columns]
